# Supplementary material for: Exploiting the DCAF16–SPIN4 interaction to identify DCAF16 ligands for PROTAC development
Source: Royal Society of Chemistry journal article supplement (doi:10.1039/d4md00681j), 2024-12-06
Supplement: d4md00681j2.xlsx [file d4md00681j2.xlsx]

## Sheet: Screen_5µM_640 compounds
Source Plate	Source Well	Compound name	Assay Well	Percent Inhibition HTRF	Average Inhibition
Zhang-ECH001	A03	ECH001-A03	A03	0.0770306	0.0354711
Zhang-ECH001	A03	ECH001-A03	A04	-0.00608837	0.0354711
Zhang-ECH001	A05	ECH001-A05	A05	0.215672	0.162366
Zhang-ECH001	A05	ECH001-A05	A06	0.109061	0.162366
Zhang-ECH001	A07	ECH001-A07	A07	0.214448	0.109964
Zhang-ECH001	A07	ECH001-A07	A08	0.00547916	0.109964
Zhang-ECH001	A09	ECH001-A09	A09	0.37712	0.314241
Zhang-ECH001	A09	ECH001-A09	A10	0.251361	0.314241
Zhang-ECH001	A11	ECH001-A11	A11	0.118413	0.206733
Zhang-ECH001	A11	ECH001-A11	A12	0.295052	0.206733
Zhang-ECH001	A13	ECH001-A13	A13	0.230319	0.235055
Zhang-ECH001	A13	ECH001-A13	A14	0.239791	0.235055
Zhang-ECH001	A15	ECH001-A15	A15	0.110223	0.161155
Zhang-ECH001	A15	ECH001-A15	A16	0.212087	0.161155
Zhang-ECH001	A17	ECH001-A17	A17	0.0818502	0.107291
Zhang-ECH001	A17	ECH001-A17	A18	0.132732	0.107291
Zhang-ECH001	A19	ECH001-A19	A19	0.100955	0.0943566
Zhang-ECH001	A19	ECH001-A19	A20	0.0877585	0.0943566
Zhang-ECH001	A21	ECH001-A21	A21	-0.044844	0.0500619
Zhang-ECH001	A21	ECH001-A21	A22	0.144968	0.0500619
Zhang-ECH001	B03	ECH001-B03	B03	0.183272	0.218276
Zhang-ECH001	B03	ECH001-B03	B04	0.25328	0.218276
Zhang-ECH001	B05	ECH001-B05	B05	0.224187	0.170142
Zhang-ECH001	B05	ECH001-B05	B06	0.116096	0.170142
Zhang-ECH001	B07	ECH001-B07	B07	0.109222	0.0515872
Zhang-ECH001	B07	ECH001-B07	B08	-0.00604806	0.0515872
Zhang-ECH001	B09	ECH001-B09	B09	0.3738	0.321247
Zhang-ECH001	B09	ECH001-B09	B10	0.268695	0.321247
Zhang-ECH001	B11	ECH001-B11	B11	0.101417	0.134628
Zhang-ECH001	B11	ECH001-B11	B12	0.167838	0.134628
Zhang-ECH001	B13	ECH001-B13	B13	0.368385	0.301427
Zhang-ECH001	B13	ECH001-B13	B14	0.23447	0.301427
Zhang-ECH001	B15	ECH001-B15	B15	0.186231	0.202987
Zhang-ECH001	B15	ECH001-B15	B16	0.219743	0.202987
Zhang-ECH001	B17	ECH001-B17	B17	0.159778	0.192094
Zhang-ECH001	B17	ECH001-B17	B18	0.22441	0.192094
Zhang-ECH001	B19	ECH001-B19	B19	0.0999662	0.151399
Zhang-ECH001	B19	ECH001-B19	B20	0.202832	0.151399
Zhang-ECH001	B21	ECH001-B21	B21	0.122426	0.140589
Zhang-ECH001	B21	ECH001-B21	B22	0.158751	0.140589
Zhang-ECH001	C03	ECH001-C03	C03	0.170613	0.174061
Zhang-ECH001	C03	ECH001-C03	C04	0.177508	0.174061
Zhang-ECH001	C05	ECH001-C05	C05	0.160085	0.146385
Zhang-ECH001	C05	ECH001-C05	C06	0.132684	0.146385
Zhang-ECH001	C07	ECH001-C07	C07	0.143928	0.147654
Zhang-ECH001	C07	ECH001-C07	C08	0.151381	0.147654
Zhang-ECH001	C09	ECH001-C09	C09	0.190423	0.192473
Zhang-ECH001	C09	ECH001-C09	C10	0.194524	0.192473
Zhang-ECH001	C11	ECH001-C11	C11	0.118391	0.0693332
Zhang-ECH001	C11	ECH001-C11	C12	0.020276	0.0693332
Zhang-ECH001	C13	ECH001-C13	C13	0.195168	0.162732
Zhang-ECH001	C13	ECH001-C13	C14	0.130296	0.162732
Zhang-ECH001	C15	ECH001-C15	C15	0.136848	0.153377
Zhang-ECH001	C15	ECH001-C15	C16	0.169907	0.153377
Zhang-ECH001	C17	ECH001-C17	C17	0.199418	0.202891
Zhang-ECH001	C17	ECH001-C17	C18	0.206364	0.202891
Zhang-ECH001	C19	ECH001-C19	C19	0.0676041	0.0938132
Zhang-ECH001	C19	ECH001-C19	C20	0.120022	0.0938132
Zhang-ECH001	C21	ECH001-C21	C21	0.0178707	0.0847813
Zhang-ECH001	C21	ECH001-C21	C22	0.151692	0.0847813
Zhang-ECH001	D03	ECH001-D03	D03	0.106339	0.137697
Zhang-ECH001	D03	ECH001-D03	D04	0.169054	0.137697
Zhang-ECH001	D05	ECH001-D05	D05	0.0966894	0.097087
Zhang-ECH001	D05	ECH001-D05	D06	0.0974846	0.097087
Zhang-ECH001	D07	ECH001-D07	D07	0.123395	0.098129
Zhang-ECH001	D07	ECH001-D07	D08	0.0728634	0.098129
Zhang-ECH001	D09	ECH001-D09	D09	0.0870878	0.0783347
Zhang-ECH001	D09	ECH001-D09	D10	0.0695817	0.0783347
Zhang-ECH001	D11	ECH001-D11	D11	0.0939011	0.0704739
Zhang-ECH001	D11	ECH001-D11	D12	0.0470467	0.0704739
Zhang-ECH001	D13	ECH001-D13	D13	0.0522991	0.0873472
Zhang-ECH001	D13	ECH001-D13	D14	0.122395	0.0873472
Zhang-ECH001	D15	ECH001-D15	D15	0.0902565	0.0897217
Zhang-ECH001	D15	ECH001-D15	D16	0.089187	0.0897217
Zhang-ECH001	D17	ECH001-D17	D17	0.173183	0.182252
Zhang-ECH001	D17	ECH001-D17	D18	0.191321	0.182252
Zhang-ECH001	D19	ECH001-D19	D19	0.17376	0.172503
Zhang-ECH001	D19	ECH001-D19	D20	0.171246	0.172503
Zhang-ECH001	D21	ECH001-D21	D21	0.0391128	0.0282893
Zhang-ECH001	D21	ECH001-D21	D22	0.0174658	0.0282893
Zhang-ECH001	E03	ECH001-E03	E03	0.13176	0.161311
Zhang-ECH001	E03	ECH001-E03	E04	0.190862	0.161311
Zhang-ECH001	E05	ECH001-E05	E05	0.176821	0.141548
Zhang-ECH001	E05	ECH001-E05	E06	0.106274	0.141548
Zhang-ECH001	E07	ECH001-E07	E07	0.194629	0.0788139
Zhang-ECH001	E07	ECH001-E07	E08	-0.0370007	0.0788139
Zhang-ECH001	E09	ECH001-E09	E09	0.312722	0.247075
Zhang-ECH001	E09	ECH001-E09	E10	0.181428	0.247075
Zhang-ECH001	E11	ECH001-E11	E11	0.10551	0.139282
Zhang-ECH001	E11	ECH001-E11	E12	0.173055	0.139282
Zhang-ECH001	E13	ECH001-E13	E13	0.171608	0.141788
Zhang-ECH001	E13	ECH001-E13	E14	0.111969	0.141788
Zhang-ECH001	E15	ECH001-E15	E15	0.202099	0.198421
Zhang-ECH001	E15	ECH001-E15	E16	0.194744	0.198421
Zhang-ECH001	E17	ECH001-E17	E17	0.0286604	0.0543168
Zhang-ECH001	E17	ECH001-E17	E18	0.0799731	0.0543168
Zhang-ECH001	E19	ECH001-E19	E19	0.0638665	0.0786838
Zhang-ECH001	E19	ECH001-E19	E20	0.093501	0.0786838
Zhang-ECH001	E21	ECH001-E21	E21	0.0716537	0.108795
Zhang-ECH001	E21	ECH001-E21	E22	0.145937	0.108795
Zhang-ECH001	F03	ECH001-F03	F03	0.169098	0.165181
Zhang-ECH001	F03	ECH001-F03	F04	0.161264	0.165181
Zhang-ECH001	F05	ECH001-F05	F05	0.188735	0.119509
Zhang-ECH001	F05	ECH001-F05	F06	0.0502831	0.119509
Zhang-ECH001	F07	ECH001-F07	F07	0.059027	-0.012088
Zhang-ECH001	F07	ECH001-F07	F08	-0.0832031	-0.012088
Zhang-ECH001	F09	ECH001-F09	F09	0.285011	0.228607
Zhang-ECH001	F09	ECH001-F09	F10	0.172204	0.228607
Zhang-ECH001	F11	ECH001-F11	F11	0.0369353	0.0860315
Zhang-ECH001	F11	ECH001-F11	F12	0.135128	0.0860315
Zhang-ECH001	F13	ECH001-F13	F13	0.0879296	0.0476349
Zhang-ECH001	F13	ECH001-F13	F14	0.00734018	0.0476349
Zhang-ECH001	F15	ECH001-F15	F15	0.0774927	0.0870394
Zhang-ECH001	F15	ECH001-F15	F16	0.096586	0.0870394
Zhang-ECH001	F17	ECH001-F17	F17	0.0489306	0.0182999
Zhang-ECH001	F17	ECH001-F17	F18	-0.0123308	0.0182999
Zhang-ECH001	F19	ECH001-F19	F19	0.109348	0.100024
Zhang-ECH001	F19	ECH001-F19	F20	0.0907008	0.100024
Zhang-ECH001	F21	ECH001-F21	F21	-0.085022	0.00771829
Zhang-ECH001	F21	ECH001-F21	F22	0.100459	0.00771829
Zhang-ECH001	G03	ECH001-G03	G03	0.0442769	0.103193
Zhang-ECH001	G03	ECH001-G03	G04	0.162109	0.103193
Zhang-ECH001	G05	ECH001-G05	G05	0.194649	0.169826
Zhang-ECH001	G05	ECH001-G05	G06	0.145002	0.169826
Zhang-ECH001	G07	ECH001-G07	G07	0.106868	0.0551301
Zhang-ECH001	G07	ECH001-G07	G08	0.00339262	0.0551301
Zhang-ECH001	G09	ECH001-G09	G09	0.294953	0.252027
Zhang-ECH001	G09	ECH001-G09	G10	0.2091	0.252027
Zhang-ECH001	G11	ECH001-G11	G11	0.154641	0.14966
Zhang-ECH001	G11	ECH001-G11	G12	0.144678	0.14966
Zhang-ECH001	G13	ECH001-G13	G13	0.160556	0.183709
Zhang-ECH001	G13	ECH001-G13	G14	0.206862	0.183709
Zhang-ECH001	G15	ECH001-G15	G15	0.212047	0.215371
Zhang-ECH001	G15	ECH001-G15	G16	0.218695	0.215371
Zhang-ECH001	G17	ECH001-G17	G17	0.562527	0.538696
Zhang-ECH001	G17	ECH001-G17	G18	0.514864	0.538696
Zhang-ECH001	G19	ECH001-G19	G19	0.319269	0.301044
Zhang-ECH001	G19	ECH001-G19	G20	0.282819	0.301044
Zhang-ECH001	G21	ECH001-G21	G21	0.0718072	0.140869
Zhang-ECH001	G21	ECH001-G21	G22	0.209931	0.140869
Zhang-ECH001	H03	ECH001-H03	H03	0.201173	0.229269
Zhang-ECH001	H03	ECH001-H03	H04	0.257365	0.229269
Zhang-ECH001	H05	ECH001-H05	H05	0.324663	0.228527
Zhang-ECH001	H05	ECH001-H05	H06	0.132391	0.228527
Zhang-ECH001	H07	ECH001-H07	H07	0.197896	0.190285
Zhang-ECH001	H07	ECH001-H07	H08	0.182674	0.190285
Zhang-ECH001	H09	ECH001-H09	H09	0.166376	0.157379
Zhang-ECH001	H09	ECH001-H09	H10	0.148381	0.157379
Zhang-ECH001	H11	ECH001-H11	H11	0.100576	0.140302
Zhang-ECH001	H11	ECH001-H11	H12	0.180029	0.140302
Zhang-ECH001	H13	ECH001-H13	H13	0.244059	0.224803
Zhang-ECH001	H13	ECH001-H13	H14	0.205547	0.224803
Zhang-ECH001	H15	ECH001-H15	H15	0.273474	0.272662
Zhang-ECH001	H15	ECH001-H15	H16	0.271849	0.272662
Zhang-ECH001	H17	ECH001-H17	H17	0.125528	0.125833
Zhang-ECH001	H17	ECH001-H17	H18	0.126139	0.125833
Zhang-ECH001	H19	ECH001-H19	H19	0.205321	0.170972
Zhang-ECH001	H19	ECH001-H19	H20	0.136623	0.170972
Zhang-ECH001	H21	ECH001-H21	H21	0.208794	0.213375
Zhang-ECH001	H21	ECH001-H21	H22	0.217955	0.213375
Zhang-ECH001	I03	ECH001-I03	I03	0.106899	0.145111
Zhang-ECH001	I03	ECH001-I03	I04	0.183323	0.145111
Zhang-ECH001	I05	ECH001-I05	I05	0.113711	0.0824477
Zhang-ECH001	I05	ECH001-I05	I06	0.0511842	0.0824477
Zhang-ECH001	I07	ECH001-I07	I07	0.0577808	0.0779864
Zhang-ECH001	I07	ECH001-I07	I08	0.0981921	0.0779864
Zhang-ECH001	I09	ECH001-I09	I09	0.078707	0.0805169
Zhang-ECH001	I09	ECH001-I09	I10	0.0823268	0.0805169
Zhang-ECH001	I11	ECH001-I11	I11	0.142928	0.131738
Zhang-ECH001	I11	ECH001-I11	I12	0.120547	0.131738
Zhang-ECH001	I13	ECH001-I13	I13	-0.0156331	0.040898
Zhang-ECH001	I13	ECH001-I13	I14	0.097429	0.040898
Zhang-ECH001	I15	ECH001-I15	I15	-0.0973224	0.0133886
Zhang-ECH001	I15	ECH001-I15	I16	0.1241	0.0133886
Zhang-ECH001	I17	ECH001-I17	I17	0.14384	0.158701
Zhang-ECH001	I17	ECH001-I17	I18	0.173562	0.158701
Zhang-ECH001	I19	ECH001-I19	I19	0.133828	0.102055
Zhang-ECH001	I19	ECH001-I19	I20	0.0702818	0.102055
Zhang-ECH001	I21	ECH001-I21	I21	0.0211011	0.0516291
Zhang-ECH001	I21	ECH001-I21	I22	0.0821572	0.0516291
Zhang-ECH001	J03	ECH001-J03	J03	0.0429499	0.0577679
Zhang-ECH001	J03	ECH001-J03	J04	0.072586	0.0577679
Zhang-ECH001	J05	ECH001-J05	J05	0.0798177	0.0642973
Zhang-ECH001	J05	ECH001-J05	J06	0.0487769	0.0642973
Zhang-ECH001	J07	ECH001-J07	J07	0.0300291	0.064853
Zhang-ECH001	J07	ECH001-J07	J08	0.0996769	0.064853
Zhang-ECH001	J09	ECH001-J09	J09	0.101174	0.0357807
Zhang-ECH001	J09	ECH001-J09	J10	-0.0296128	0.0357807
Zhang-ECH001	J11	ECH001-J11	J11	-0.05546	-0.0169939
Zhang-ECH001	J11	ECH001-J11	J12	0.0214723	-0.0169939
Zhang-ECH001	J13	ECH001-J13	J13	0.0276265	-0.0137016
Zhang-ECH001	J13	ECH001-J13	J14	-0.0550297	-0.0137016
Zhang-ECH001	J15	ECH001-J15	J15	0.0518693	0.0309115
Zhang-ECH001	J15	ECH001-J15	J16	0.00995373	0.0309115
Zhang-ECH001	J17	ECH001-J17	J17	-0.0501919	-0.0146101
Zhang-ECH001	J17	ECH001-J17	J18	0.0209717	-0.0146101
Zhang-ECH001	J19	ECH001-J19	J19	-0.0360523	0.0426641
Zhang-ECH001	J19	ECH001-J19	J20	0.12138	0.0426641
Zhang-ECH001	J21	ECH001-J21	J21	0.0178444	-0.0346914
Zhang-ECH001	J21	ECH001-J21	J22	-0.0872273	-0.0346914
Zhang-ECH001	K03	ECH001-K03	K03	0.0817482	0.0650494
Zhang-ECH001	K03	ECH001-K03	K04	0.0483506	0.0650494
Zhang-ECH001	K05	ECH001-K05	K05	0.193962	0.09329
Zhang-ECH001	K05	ECH001-K05	K06	-0.00738171	0.09329
Zhang-ECH001	K07	ECH001-K07	K07	0.159603	0.125784
Zhang-ECH001	K07	ECH001-K07	K08	0.0919661	0.125784
Zhang-ECH001	K09	ECH001-K09	K09	0.0468781	0.10105
Zhang-ECH001	K09	ECH001-K09	K10	0.155222	0.10105
Zhang-ECH001	K11	ECH001-K11	K11	0.0640298	0.0765406
Zhang-ECH001	K11	ECH001-K11	K12	0.0890514	0.0765406
Zhang-ECH001	K13	ECH001-K13	K13	-0.064963	-0.0204187
Zhang-ECH001	K13	ECH001-K13	K14	0.0241256	-0.0204187
Zhang-ECH001	K15	ECH001-K15	K15	0.0454262	0.0669107
Zhang-ECH001	K15	ECH001-K15	K16	0.0883952	0.0669107
Zhang-ECH001	K17	ECH001-K17	K17	-0.0497454	-0.0522756
Zhang-ECH001	K17	ECH001-K17	K18	-0.0548059	-0.0522756
Zhang-ECH001	K19	ECH001-K19	K19	0.0756777	0.0889129
Zhang-ECH001	K19	ECH001-K19	K20	0.102148	0.0889129
Zhang-ECH001	K21	ECH001-K21	K21	-0.0318142	-0.0275477
Zhang-ECH001	K21	ECH001-K21	K22	-0.0232812	-0.0275477
Zhang-ECH001	L03	ECH001-L03	L03	-0.0701527	0.0498142
Zhang-ECH001	L03	ECH001-L03	L04	0.169781	0.0498142
Zhang-ECH001	L05	ECH001-L05	L05	0.144464	0.111135
Zhang-ECH001	L05	ECH001-L05	L06	0.0778057	0.111135
Zhang-ECH001	L07	ECH001-L07	L07	0.117577	0.100369
Zhang-ECH001	L07	ECH001-L07	L08	0.0831614	0.100369
Zhang-ECH001	L09	ECH001-L09	L09	0.164058	0.191972
Zhang-ECH001	L09	ECH001-L09	L10	0.219886	0.191972
Zhang-ECH001	L11	ECH001-L11	L11	0.105756	0.11996
Zhang-ECH001	L11	ECH001-L11	L12	0.134165	0.11996
Zhang-ECH001	L13	ECH001-L13	L13	0.0392198	0.0907043
Zhang-ECH001	L13	ECH001-L13	L14	0.142189	0.0907043
Zhang-ECH001	L15	ECH001-L15	L15	-0.00490935	0.0125738
Zhang-ECH001	L15	ECH001-L15	L16	0.030057	0.0125738
Zhang-ECH001	L17	ECH001-L17	L17	0.00273404	0.0306079
Zhang-ECH001	L17	ECH001-L17	L18	0.0584817	0.0306079
Zhang-ECH001	L19	ECH001-L19	L19	-0.0212367	0.0110124
Zhang-ECH001	L19	ECH001-L19	L20	0.0432615	0.0110124
Zhang-ECH001	L21	ECH001-L21	L21	-0.0218858	-0.0146598
Zhang-ECH001	L21	ECH001-L21	L22	-0.00743375	-0.0146598
Zhang-ECH001	M03	ECH001-M03	M03	0.112653	0.118948
Zhang-ECH001	M03	ECH001-M03	M04	0.125244	0.118948
Zhang-ECH001	M05	ECH001-M05	M05	0.00437588	0.0439658
Zhang-ECH001	M05	ECH001-M05	M06	0.0835558	0.0439658
Zhang-ECH001	M07	ECH001-M07	M07	0.073524	0.091652
Zhang-ECH001	M07	ECH001-M07	M08	0.10978	0.091652
Zhang-ECH001	M09	ECH001-M09	M09	0.14272	0.148809
Zhang-ECH001	M09	ECH001-M09	M10	0.154899	0.148809
Zhang-ECH001	M11	ECH001-M11	M11	-0.00122478	0.0805514
Zhang-ECH001	M11	ECH001-M11	M12	0.162328	0.0805514
Zhang-ECH001	M13	ECH001-M13	M13	0.178736	0.0521879
Zhang-ECH001	M13	ECH001-M13	M14	-0.0743598	0.0521879
Zhang-ECH001	M15	ECH001-M15	M15	0.03597	0.0445062
Zhang-ECH001	M15	ECH001-M15	M16	0.0530424	0.0445062
Zhang-ECH001	M17	ECH001-M17	M17	0.0311622	0.0297554
Zhang-ECH001	M17	ECH001-M17	M18	0.0283486	0.0297554
Zhang-ECH001	M19	ECH001-M19	M19	0.126478	0.100994
Zhang-ECH001	M19	ECH001-M19	M20	0.0755105	0.100994
Zhang-ECH001	M21	ECH001-M21	M21	0.0288439	0.0129443
Zhang-ECH001	M21	ECH001-M21	M22	-0.00295535	0.0129443
Zhang-ECH001	N03	ECH001-N03	N03	0.052781	0.00537647
Zhang-ECH001	N03	ECH001-N03	N04	-0.0420281	0.00537647
Zhang-ECH001	N05	ECH001-N05	N05	0.0272929	-0.0355999
Zhang-ECH001	N05	ECH001-N05	N06	-0.0984927	-0.0355999
Zhang-ECH001	N07	ECH001-N07	N07	-0.0619424	-0.0303064
Zhang-ECH001	N07	ECH001-N07	N08	0.00132957	-0.0303064
Zhang-ECH001	N09	ECH001-N09	N09	-0.0116517	0.0293354
Zhang-ECH001	N09	ECH001-N09	N10	0.0703225	0.0293354
Zhang-ECH001	N11	ECH001-N11	N11	-0.236008	-0.107268
Zhang-ECH001	N11	ECH001-N11	N12	0.0214726	-0.107268
Zhang-ECH001	N13	ECH001-N13	N13	0.0474147	0.0403265
Zhang-ECH001	N13	ECH001-N13	N14	0.0332383	0.0403265
Zhang-ECH001	N15	ECH001-N15	N15	-0.00563881	0.0694271
Zhang-ECH001	N15	ECH001-N15	N16	0.144493	0.0694271
Zhang-ECH001	N17	ECH001-N17	N17	0.137471	0.104904
Zhang-ECH001	N17	ECH001-N17	N18	0.0723365	0.104904
Zhang-ECH001	N19	ECH001-N19	N19	0.0288519	0.0163125
Zhang-ECH001	N19	ECH001-N19	N20	0.00377316	0.0163125
Zhang-ECH001	N21	ECH001-N21	N21	-0.0657826	-0.0744818
Zhang-ECH001	N21	ECH001-N21	N22	-0.083181	-0.0744818
Zhang-ECH001	O03	ECH001-O03	O03	-0.177523	-0.0938374
Zhang-ECH001	O03	ECH001-O03	O04	-0.0101519	-0.0938374
Zhang-ECH001	O05	ECH001-O05	O05	-0.127383	-0.110583
Zhang-ECH001	O05	ECH001-O05	O06	-0.0937828	-0.110583
Zhang-ECH001	O07	ECH001-O07	O07	-0.0838037	-0.0762001
Zhang-ECH001	O07	ECH001-O07	O08	-0.0685964	-0.0762001
Zhang-ECH001	O09	ECH001-O09	O09	-0.0400223	-0.033002
Zhang-ECH001	O09	ECH001-O09	O10	-0.0259817	-0.033002
Zhang-ECH001	O11	ECH001-O11	O11	-0.151353	-0.0978632
Zhang-ECH001	O11	ECH001-O11	O12	-0.0443734	-0.0978632
Zhang-ECH001	O13	ECH001-O13	O13	-0.0592497	-0.14087
Zhang-ECH001	O13	ECH001-O13	O14	-0.22249	-0.14087
Zhang-ECH001	O15	ECH001-O15	O15	0.025993	-0.042105
Zhang-ECH001	O15	ECH001-O15	O16	-0.110203	-0.042105
Zhang-ECH001	O17	ECH001-O17	O17	0.0192967	-0.0112626
Zhang-ECH001	O17	ECH001-O17	O18	-0.0418219	-0.0112626
Zhang-ECH001	O19	ECH001-O19	O19	-0.153889	-0.0858777
Zhang-ECH001	O19	ECH001-O19	O20	-0.0178668	-0.0858777
Zhang-ECH001	O21	ECH001-O21	O21	0.0138328	-0.199507
Zhang-ECH001	O21	ECH001-O21	O22	-0.412846	-0.199507
Zhang-ECH001	P03	ECH001-P03	P03	-0.0999592	-0.108424
Zhang-ECH001	P03	ECH001-P03	P04	-0.116888	-0.108424
Zhang-ECH001	P05	ECH001-P05	P05	-0.0222575	-0.0759958
Zhang-ECH001	P05	ECH001-P05	P06	-0.129734	-0.0759958
Zhang-ECH001	P07	ECH001-P07	P07	-0.0168392	-0.0278646
Zhang-ECH001	P07	ECH001-P07	P08	-0.03889	-0.0278646
Zhang-ECH001	P09	ECH001-P09	P09	0.0786646	0.0150098
Zhang-ECH001	P09	ECH001-P09	P10	-0.0486451	0.0150098
Zhang-ECH001	P11	ECH001-P11	P11	-0.207779	-0.117301
Zhang-ECH001	P11	ECH001-P11	P12	-0.0268242	-0.117301
Zhang-ECH001	P13	ECH001-P13	P13	-0.181355	-0.174181
Zhang-ECH001	P13	ECH001-P13	P14	-0.167008	-0.174181
Zhang-ECH001	P15	ECH001-P15	P15	-0.0622712	-0.144778
Zhang-ECH001	P15	ECH001-P15	P16	-0.227284	-0.144778
Zhang-ECH001	P17	ECH001-P17	P17	-0.129546	-0.0948648
Zhang-ECH001	P17	ECH001-P17	P18	-0.060184	-0.0948648
Zhang-ECH001	P19	ECH001-P19	P19	-0.0501177	-0.00914195
Zhang-ECH001	P19	ECH001-P19	P20	0.0318338	-0.00914195
Zhang-ECH001	P21	ECH001-P21	P21	-0.178053	-0.15004
Zhang-ECH001	P21	ECH001-P21	P22	-0.122027	-0.15004
Zhang-ECH002	A03	ECH002-A03	A03	-0.0290524	-0.0571032
Zhang-ECH002	A03	ECH002-A03	A04	-0.085154	-0.0571032
Zhang-ECH002	A05	ECH002-A05	A05	-0.113233	-0.0822208
Zhang-ECH002	A05	ECH002-A05	A06	-0.0512088	-0.0822208
Zhang-ECH002	A07	ECH002-A07	A07	-0.022207	0.00168933
Zhang-ECH002	A07	ECH002-A07	A08	0.0255857	0.00168933
Zhang-ECH002	A09	ECH002-A09	A09	-0.074103	-0.0406516
Zhang-ECH002	A09	ECH002-A09	A10	-0.00720016	-0.0406516
Zhang-ECH002	A11	ECH002-A11	A11	-0.00235764	-0.0684566
Zhang-ECH002	A11	ECH002-A11	A12	-0.134556	-0.0684566
Zhang-ECH002	A13	ECH002-A13	A13	0.12496	0.010806
Zhang-ECH002	A13	ECH002-A13	A14	-0.103348	0.010806
Zhang-ECH002	A15	ECH002-A15	A15	-0.0882749	-0.107943
Zhang-ECH002	A15	ECH002-A15	A16	-0.127612	-0.107943
Zhang-ECH002	A17	ECH002-A17	A17	0.127698	0.116077
Zhang-ECH002	A17	ECH002-A17	A18	0.104455	0.116077
Zhang-ECH002	A19	ECH002-A19	A19	0.137194	0.140986
Zhang-ECH002	A19	ECH002-A19	A20	0.144778	0.140986
Zhang-ECH002	A21	ECH002-A21	A21	0.0711621	0.122673
Zhang-ECH002	A21	ECH002-A21	A22	0.174184	0.122673
Zhang-ECH002	B03	ECH002-B03	B03	-0.0887046	-0.0910307
Zhang-ECH002	B03	ECH002-B03	B04	-0.0933567	-0.0910307
Zhang-ECH002	B05	ECH002-B05	B05	-0.119571	-0.106256
Zhang-ECH002	B05	ECH002-B05	B06	-0.0929416	-0.106256
Zhang-ECH002	B07	ECH002-B07	B07	0.0608531	0.0637677
Zhang-ECH002	B07	ECH002-B07	B08	0.0666824	0.0637677
Zhang-ECH002	B09	ECH002-B09	B09	0.306209	0.259332
Zhang-ECH002	B09	ECH002-B09	B10	0.212454	0.259332
Zhang-ECH002	B11	ECH002-B11	B11	0.209193	0.144405
Zhang-ECH002	B11	ECH002-B11	B12	0.0796165	0.144405
Zhang-ECH002	B13	ECH002-B13	B13	-0.0264403	-0.0822098
Zhang-ECH002	B13	ECH002-B13	B14	-0.137979	-0.0822098
Zhang-ECH002	B15	ECH002-B15	B15	0.184904	0.174087
Zhang-ECH002	B15	ECH002-B15	B16	0.16327	0.174087
Zhang-ECH002	B17	ECH002-B17	B17	0.0998014	0.0917926
Zhang-ECH002	B17	ECH002-B17	B18	0.0837838	0.0917926
Zhang-ECH002	B19	ECH002-B19	B19	-0.105834	-0.0104725
Zhang-ECH002	B19	ECH002-B19	B20	0.084889	-0.0104725
Zhang-ECH002	B21	ECH002-B21	B21	0.0701791	0.0519546
Zhang-ECH002	B21	ECH002-B21	B22	0.0337301	0.0519546
Zhang-ECH002	C03	ECH002-C03	C03	-0.118573	-0.0887491
Zhang-ECH002	C03	ECH002-C03	C04	-0.0589253	-0.0887491
Zhang-ECH002	C05	ECH002-C05	C05	-0.00492311	0.00893813
Zhang-ECH002	C05	ECH002-C05	C06	0.0227994	0.00893813
Zhang-ECH002	C07	ECH002-C07	C07	0.0870238	0.0870401
Zhang-ECH002	C07	ECH002-C07	C08	0.0870564	0.0870401
Zhang-ECH002	C09	ECH002-C09	C09	0.0614943	0.0679482
Zhang-ECH002	C09	ECH002-C09	C10	0.0744021	0.0679482
Zhang-ECH002	C11	ECH002-C11	C11	0.0951812	0.0583904
Zhang-ECH002	C11	ECH002-C11	C12	0.0215996	0.0583904
Zhang-ECH002	C13	ECH002-C13	C13	0.244179	0.00720911
Zhang-ECH002	C13	ECH002-C13	C14	-0.229761	0.00720911
Zhang-ECH002	C15	ECH002-C15	C15	-0.000706426	0.0203787
Zhang-ECH002	C15	ECH002-C15	C16	0.0414638	0.0203787
Zhang-ECH002	C17	ECH002-C17	C17	0.00365079	0.00762578
Zhang-ECH002	C17	ECH002-C17	C18	0.0116008	0.00762578
Zhang-ECH002	C19	ECH002-C19	C19	-0.0507985	-0.0552222
Zhang-ECH002	C19	ECH002-C19	C20	-0.059646	-0.0552222
Zhang-ECH002	C21	ECH002-C21	C21	-0.0965283	-0.0836414
Zhang-ECH002	C21	ECH002-C21	C22	-0.0707546	-0.0836414
Zhang-ECH002	D03	ECH002-D03	D03	0.0486945	0.0781077
Zhang-ECH002	D03	ECH002-D03	D04	0.107521	0.0781077
Zhang-ECH002	D05	ECH002-D05	D05	0.014407	-0.00106623
Zhang-ECH002	D05	ECH002-D05	D06	-0.0165394	-0.00106623
Zhang-ECH002	D07	ECH002-D07	D07	0.123107	0.0637575
Zhang-ECH002	D07	ECH002-D07	D08	0.00440779	0.0637575
Zhang-ECH002	D09	ECH002-D09	D09	0.119816	0.125505
Zhang-ECH002	D09	ECH002-D09	D10	0.131194	0.125505
Zhang-ECH002	D11	ECH002-D11	D11	0.120229	0.080013
Zhang-ECH002	D11	ECH002-D11	D12	0.0397973	0.080013
Zhang-ECH002	D13	ECH002-D13	D13	0.198952	0.114699
Zhang-ECH002	D13	ECH002-D13	D14	0.0304451	0.114699
Zhang-ECH002	D15	ECH002-D15	D15	0.165611	0.190773
Zhang-ECH002	D15	ECH002-D15	D16	0.215935	0.190773
Zhang-ECH002	D17	ECH002-D17	D17	0.0831085	0.104621
Zhang-ECH002	D17	ECH002-D17	D18	0.126134	0.104621
Zhang-ECH002	D19	ECH002-D19	D19	0.116981	0.0997641
Zhang-ECH002	D19	ECH002-D19	D20	0.0825476	0.0997641
Zhang-ECH002	D21	ECH002-D21	D21	-0.0164396	0.0164517
Zhang-ECH002	D21	ECH002-D21	D22	0.0493429	0.0164517
Zhang-ECH002	E03	ECH002-E03	E03	-0.0496163	-0.000629522
Zhang-ECH002	E03	ECH002-E03	E04	0.0483572	-0.000629522
Zhang-ECH002	E05	ECH002-E05	E05	-0.0670526	0.038466
Zhang-ECH002	E05	ECH002-E05	E06	0.143985	0.038466
Zhang-ECH002	E07	ECH002-E07	E07	0.15744	0.182815
Zhang-ECH002	E07	ECH002-E07	E08	0.208189	0.182815
Zhang-ECH002	E09	ECH002-E09	E09	0.154058	0.148151
Zhang-ECH002	E09	ECH002-E09	E10	0.142244	0.148151
Zhang-ECH002	E11	ECH002-E11	E11	0.117904	0.129929
Zhang-ECH002	E11	ECH002-E11	E12	0.141953	0.129929
Zhang-ECH002	E13	ECH002-E13	E13	0.180793	0.126024
Zhang-ECH002	E13	ECH002-E13	E14	0.0712544	0.126024
Zhang-ECH002	E15	ECH002-E15	E15	0.0999811	0.100083
Zhang-ECH002	E15	ECH002-E15	E16	0.100186	0.100083
Zhang-ECH002	E17	ECH002-E17	E17	0.160432	0.0973804
Zhang-ECH002	E17	ECH002-E17	E18	0.0343293	0.0973804
Zhang-ECH002	E19	ECH002-E19	E19	-0.0377626	-0.0107085
Zhang-ECH002	E19	ECH002-E19	E20	0.0163456	-0.0107085
Zhang-ECH002	E21	ECH002-E21	E21	-0.0115796	-0.0184228
Zhang-ECH002	E21	ECH002-E21	E22	-0.0252659	-0.0184228
Zhang-ECH002	F03	ECH002-F03	F03	0.123076	0.0608596
Zhang-ECH002	F03	ECH002-F03	F04	-0.00135681	0.0608596
Zhang-ECH002	F05	ECH002-F05	F05	0.17436	0.164404
Zhang-ECH002	F05	ECH002-F05	F06	0.154447	0.164404
Zhang-ECH002	F07	ECH002-F07	F07	0.45254	0.467406
Zhang-ECH002	F07	ECH002-F07	F08	0.482272	0.467406
Zhang-ECH002	F09	ECH002-F09	F09	0.339863	0.371826
Zhang-ECH002	F09	ECH002-F09	F10	0.403789	0.371826
Zhang-ECH002	F11	ECH002-F11	F11	0.250619	0.245572
Zhang-ECH002	F11	ECH002-F11	F12	0.240526	0.245572
Zhang-ECH002	F13	ECH002-F13	F13	0.30823	0.243294
Zhang-ECH002	F13	ECH002-F13	F14	0.178358	0.243294
Zhang-ECH002	F15	ECH002-F15	F15	0.0785797	0.0830967
Zhang-ECH002	F15	ECH002-F15	F16	0.0876138	0.0830967
Zhang-ECH002	F17	ECH002-F17	F17	-0.00333509	0.0554263
Zhang-ECH002	F17	ECH002-F17	F18	0.114188	0.0554263
Zhang-ECH002	F19	ECH002-F19	F19	0.144394	0.0988515
Zhang-ECH002	F19	ECH002-F19	F20	0.0533085	0.0988515
Zhang-ECH002	F21	ECH002-F21	F21	-0.0339731	-0.071416
Zhang-ECH002	F21	ECH002-F21	F22	-0.108859	-0.071416
Zhang-ECH002	G03	ECH002-G03	G03	0.0572389	0.022007
Zhang-ECH002	G03	ECH002-G03	G04	-0.013225	0.022007
Zhang-ECH002	G05	ECH002-G05	G05	0.0382673	0.096789
Zhang-ECH002	G05	ECH002-G05	G06	0.155311	0.096789
Zhang-ECH002	G07	ECH002-G07	G07	0.29606	0.320979
Zhang-ECH002	G07	ECH002-G07	G08	0.345898	0.320979
Zhang-ECH002	G09	ECH002-G09	G09	0.220967	0.227357
Zhang-ECH002	G09	ECH002-G09	G10	0.233748	0.227357
Zhang-ECH002	G11	ECH002-G11	G11	0.20544	0.226805
Zhang-ECH002	G11	ECH002-G11	G12	0.24817	0.226805
Zhang-ECH002	G13	ECH002-G13	G13	0.0927064	0.108038
Zhang-ECH002	G13	ECH002-G13	G14	0.123369	0.108038
Zhang-ECH002	G15	ECH002-G15	G15	0.140234	0.140304
Zhang-ECH002	G15	ECH002-G15	G16	0.140375	0.140304
Zhang-ECH002	G17	ECH002-G17	G17	0.230087	0.173032
Zhang-ECH002	G17	ECH002-G17	G18	0.115976	0.173032
Zhang-ECH002	G19	ECH002-G19	G19	0.136168	-0.0601572
Zhang-ECH002	G19	ECH002-G19	G20	-0.256483	-0.0601572
Zhang-ECH002	G21	ECH002-G21	G21	0.0435305	0.0463722
Zhang-ECH002	G21	ECH002-G21	G22	0.049214	0.0463722
Zhang-ECH002	H03	ECH002-H03	H03	0.0545408	0.0613973
Zhang-ECH002	H03	ECH002-H03	H04	0.0682538	0.0613973
Zhang-ECH002	H05	ECH002-H05	H05	0.0291116	0.0654877
Zhang-ECH002	H05	ECH002-H05	H06	0.101864	0.0654877
Zhang-ECH002	H07	ECH002-H07	H07	0.0139429	0.0493463
Zhang-ECH002	H07	ECH002-H07	H08	0.0847498	0.0493463
Zhang-ECH002	H09	ECH002-H09	H09	0.10587	0.135219
Zhang-ECH002	H09	ECH002-H09	H10	0.164568	0.135219
Zhang-ECH002	H11	ECH002-H11	H11	0.215101	0.101873
Zhang-ECH002	H11	ECH002-H11	H12	-0.0113551	0.101873
Zhang-ECH002	H13	ECH002-H13	H13	0.160597	0.123422
Zhang-ECH002	H13	ECH002-H13	H14	0.0862465	0.123422
Zhang-ECH002	H15	ECH002-H15	H15	0.15865	0.0811167
Zhang-ECH002	H15	ECH002-H15	H16	0.00358385	0.0811167
Zhang-ECH002	H17	ECH002-H17	H17	0.250094	0.205645
Zhang-ECH002	H17	ECH002-H17	H18	0.161196	0.205645
Zhang-ECH002	H19	ECH002-H19	H19	0.0470502	0.0608553
Zhang-ECH002	H19	ECH002-H19	H20	0.0746604	0.0608553
Zhang-ECH002	H21	ECH002-H21	H21	0.110917	0.0560009
Zhang-ECH002	H21	ECH002-H21	H22	0.00108484	0.0560009
Zhang-ECH002	I03	ECH002-I03	I03	-0.0571132	-0.0894745
Zhang-ECH002	I03	ECH002-I03	I04	-0.121836	-0.0894745
Zhang-ECH002	I05	ECH002-I05	I05	-0.176731	-0.136978
Zhang-ECH002	I05	ECH002-I05	I06	-0.097225	-0.136978
Zhang-ECH002	I07	ECH002-I07	I07	-0.0056062	0.0505212
Zhang-ECH002	I07	ECH002-I07	I08	0.106649	0.0505212
Zhang-ECH002	I09	ECH002-I09	I09	0.117159	0.123883
Zhang-ECH002	I09	ECH002-I09	I10	0.130606	0.123883
Zhang-ECH002	I11	ECH002-I11	I11	0.118918	0.0747778
Zhang-ECH002	I11	ECH002-I11	I12	0.0306378	0.0747778
Zhang-ECH002	I13	ECH002-I13	I13	0.0844964	0.109314
Zhang-ECH002	I13	ECH002-I13	I14	0.134131	0.109314
Zhang-ECH002	I15	ECH002-I15	I15	-0.00563973	0.0196504
Zhang-ECH002	I15	ECH002-I15	I16	0.0449406	0.0196504
Zhang-ECH002	I17	ECH002-I17	I17	-0.0354491	-0.025349
Zhang-ECH002	I17	ECH002-I17	I18	-0.0152488	-0.025349
Zhang-ECH002	I19	ECH002-I19	I19	0.13873	0.0557772
Zhang-ECH002	I19	ECH002-I19	I20	-0.0271751	0.0557772
Zhang-ECH002	I21	ECH002-I21	I21	0.0688763	0.091812
Zhang-ECH002	I21	ECH002-I21	I22	0.114748	0.091812
Zhang-ECH002	J03	ECH002-J03	J03	0.18345	0.141521
Zhang-ECH002	J03	ECH002-J03	J04	0.099592	0.141521
Zhang-ECH002	J05	ECH002-J05	J05	0.149488	0.177576
Zhang-ECH002	J05	ECH002-J05	J06	0.205664	0.177576
Zhang-ECH002	J07	ECH002-J07	J07	0.178207	0.212459
Zhang-ECH002	J07	ECH002-J07	J08	0.246711	0.212459
Zhang-ECH002	J09	ECH002-J09	J09	0.258122	0.188887
Zhang-ECH002	J09	ECH002-J09	J10	0.119651	0.188887
Zhang-ECH002	J11	ECH002-J11	J11	0.337536	0.249987
Zhang-ECH002	J11	ECH002-J11	J12	0.162438	0.249987
Zhang-ECH002	J13	ECH002-J13	J13	0.24329	0.241
Zhang-ECH002	J13	ECH002-J13	J14	0.23871	0.241
Zhang-ECH002	J15	ECH002-J15	J15	0.202658	0.195127
Zhang-ECH002	J15	ECH002-J15	J16	0.187596	0.195127
Zhang-ECH002	J17	ECH002-J17	J17	0.303129	0.278622
Zhang-ECH002	J17	ECH002-J17	J18	0.254115	0.278622
Zhang-ECH002	J19	ECH002-J19	J19	0.214733	0.187265
Zhang-ECH002	J19	ECH002-J19	J20	0.159796	0.187265
Zhang-ECH002	J21	ECH002-J21	J21	0.187677	0.202768
Zhang-ECH002	J21	ECH002-J21	J22	0.217859	0.202768
Zhang-ECH002	K03	ECH002-K03	K03	-0.0265223	-0.00412103
Zhang-ECH002	K03	ECH002-K03	K04	0.0182803	-0.00412103
Zhang-ECH002	K05	ECH002-K05	K05	0.100094	0.125985
Zhang-ECH002	K05	ECH002-K05	K06	0.151877	0.125985
Zhang-ECH002	K07	ECH002-K07	K07	0.238312	0.25243
Zhang-ECH002	K07	ECH002-K07	K08	0.266548	0.25243
Zhang-ECH002	K09	ECH002-K09	K09	0.150762	0.167485
Zhang-ECH002	K09	ECH002-K09	K10	0.184209	0.167485
Zhang-ECH002	K11	ECH002-K11	K11	0.172839	0.155981
Zhang-ECH002	K11	ECH002-K11	K12	0.139123	0.155981
Zhang-ECH002	K13	ECH002-K13	K13	0.257921	0.206099
Zhang-ECH002	K13	ECH002-K13	K14	0.154277	0.206099
Zhang-ECH002	K15	ECH002-K15	K15	0.103316	0.11204
Zhang-ECH002	K15	ECH002-K15	K16	0.120764	0.11204
Zhang-ECH002	K17	ECH002-K17	K17	0.0878351	0.109213
Zhang-ECH002	K17	ECH002-K17	K18	0.130591	0.109213
Zhang-ECH002	K19	ECH002-K19	K19	0.169725	0.160229
Zhang-ECH002	K19	ECH002-K19	K20	0.150732	0.160229
Zhang-ECH002	K21	ECH002-K21	K21	0.0595415	0.0629507
Zhang-ECH002	K21	ECH002-K21	K22	0.0663598	0.0629507
Zhang-ECH002	L03	ECH002-L03	L03	0.0929392	0.0402074
Zhang-ECH002	L03	ECH002-L03	L04	-0.0125244	0.0402074
Zhang-ECH002	L05	ECH002-L05	L05	0.0159768	0.0272804
Zhang-ECH002	L05	ECH002-L05	L06	0.0385841	0.0272804
Zhang-ECH002	L07	ECH002-L07	L07	-0.0275499	0.0291265
Zhang-ECH002	L07	ECH002-L07	L08	0.0858029	0.0291265
Zhang-ECH002	L09	ECH002-L09	L09	0.0892571	0.0370411
Zhang-ECH002	L09	ECH002-L09	L10	-0.0151748	0.0370411
Zhang-ECH002	L11	ECH002-L11	L11	0.0642307	0.115355
Zhang-ECH002	L11	ECH002-L11	L12	0.16648	0.115355
Zhang-ECH002	L13	ECH002-L13	L13	0.0243208	0.0194317
Zhang-ECH002	L13	ECH002-L13	L14	0.0145426	0.0194317
Zhang-ECH002	L15	ECH002-L15	L15	0.12412	0.112304
Zhang-ECH002	L15	ECH002-L15	L16	0.100489	0.112304
Zhang-ECH002	L17	ECH002-L17	L17	0.131046	0.132081
Zhang-ECH002	L17	ECH002-L17	L18	0.133116	0.132081
Zhang-ECH002	L19	ECH002-L19	L19	0.265354	0.312781
Zhang-ECH002	L19	ECH002-L19	L20	0.360208	0.312781
Zhang-ECH002	L21	ECH002-L21	L21	0.0555892	0.0591829
Zhang-ECH002	L21	ECH002-L21	L22	0.0627767	0.0591829
Zhang-ECH002	M03	ECH002-M03	M03	0.109944	0.119904
Zhang-ECH002	M03	ECH002-M03	M04	0.129863	0.119904
Zhang-ECH002	M05	ECH002-M05	M05	0.0844981	0.1047
Zhang-ECH002	M05	ECH002-M05	M06	0.124901	0.1047
Zhang-ECH002	M07	ECH002-M07	M07	0.0826827	0.140015
Zhang-ECH002	M07	ECH002-M07	M08	0.197346	0.140015
Zhang-ECH002	M09	ECH002-M09	M09	0.221048	0.147466
Zhang-ECH002	M09	ECH002-M09	M10	0.0738845	0.147466
Zhang-ECH002	M11	ECH002-M11	M11	0.112848	0.0661901
Zhang-ECH002	M11	ECH002-M11	M12	0.0195323	0.0661901
Zhang-ECH002	M13	ECH002-M13	M13	0.175627	0.126509
Zhang-ECH002	M13	ECH002-M13	M14	0.0773905	0.126509
Zhang-ECH002	M15	ECH002-M15	M15	0.12805	0.125583
Zhang-ECH002	M15	ECH002-M15	M16	0.123117	0.125583
Zhang-ECH002	M17	ECH002-M17	M17	0.136531	0.118352
Zhang-ECH002	M17	ECH002-M17	M18	0.100173	0.118352
Zhang-ECH002	M19	ECH002-M19	M19	0.124038	0.123956
Zhang-ECH002	M19	ECH002-M19	M20	0.123873	0.123956
Zhang-ECH002	M21	ECH002-M21	M21	0.320809	0.277475
Zhang-ECH002	M21	ECH002-M21	M22	0.234141	0.277475
Zhang-ECH002	N03	ECH002-N03	N03	0.138682	0.135633
Zhang-ECH002	N03	ECH002-N03	N04	0.132584	0.135633
Zhang-ECH002	N05	ECH002-N05	N05	0.0893865	0.102861
Zhang-ECH002	N05	ECH002-N05	N06	0.116336	0.102861
Zhang-ECH002	N07	ECH002-N07	N07	0.0901593	0.148569
Zhang-ECH002	N07	ECH002-N07	N08	0.206978	0.148569
Zhang-ECH002	N09	ECH002-N09	N09	0.162616	0.140081
Zhang-ECH002	N09	ECH002-N09	N10	0.117547	0.140081
Zhang-ECH002	N11	ECH002-N11	N11	0.0721092	0.0588512
Zhang-ECH002	N11	ECH002-N11	N12	0.0455931	0.0588512
Zhang-ECH002	N13	ECH002-N13	N13	0.0668793	0.0651088
Zhang-ECH002	N13	ECH002-N13	N14	0.0633384	0.0651088
Zhang-ECH002	N15	ECH002-N15	N15	0.0601553	0.0427481
Zhang-ECH002	N15	ECH002-N15	N16	0.0253409	0.0427481
Zhang-ECH002	N17	ECH002-N17	N17	0.0857559	0.0421185
Zhang-ECH002	N17	ECH002-N17	N18	-0.0015188	0.0421185
Zhang-ECH002	N19	ECH002-N19	N19	0.133639	0.139469
Zhang-ECH002	N19	ECH002-N19	N20	0.1453	0.139469
Zhang-ECH002	N21	ECH002-N21	N21	0.178137	0.192627
Zhang-ECH002	N21	ECH002-N21	N22	0.207117	0.192627
Zhang-ECH002	O03	ECH002-O03	O03	0.00250762	0.0246842
Zhang-ECH002	O03	ECH002-O03	O04	0.0468607	0.0246842
Zhang-ECH002	O05	ECH002-O05	O05	0.126972	0.0993275
Zhang-ECH002	O05	ECH002-O05	O06	0.0716832	0.0993275
Zhang-ECH002	O07	ECH002-O07	O07	0.364341	0.375479
Zhang-ECH002	O07	ECH002-O07	O08	0.386617	0.375479
Zhang-ECH002	O09	ECH002-O09	O09	0.0629423	0.0882202
Zhang-ECH002	O09	ECH002-O09	O10	0.113498	0.0882202
Zhang-ECH002	O11	ECH002-O11	O11	0.200107	0.160779
Zhang-ECH002	O11	ECH002-O11	O12	0.121451	0.160779
Zhang-ECH002	O13	ECH002-O13	O13	0.0440972	0.00160068
Zhang-ECH002	O13	ECH002-O13	O14	-0.0408959	0.00160068
Zhang-ECH002	O15	ECH002-O15	O15	0.0342652	-0.016377
Zhang-ECH002	O15	ECH002-O15	O16	-0.0670192	-0.016377
Zhang-ECH002	O17	ECH002-O17	O17	-0.0246696	-0.0206586
Zhang-ECH002	O17	ECH002-O17	O18	-0.0166476	-0.0206586
Zhang-ECH002	O19	ECH002-O19	O19	-0.135235	-0.0679681
Zhang-ECH002	O19	ECH002-O19	O20	-0.000700813	-0.0679681
Zhang-ECH002	O21	ECH002-O21	O21	0.165939	0.122214
Zhang-ECH002	O21	ECH002-O21	O22	0.0784888	0.122214
Zhang-ECH002	P03	ECH002-P03	P03	0.105802	0.0488587
Zhang-ECH002	P03	ECH002-P03	P04	-0.00808511	0.0488587
Zhang-ECH002	P05	ECH002-P05	P05	0.0172378	0.0339487
Zhang-ECH002	P05	ECH002-P05	P06	0.0506597	0.0339487
Zhang-ECH002	P07	ECH002-P07	P07	0.0887787	0.0323625
Zhang-ECH002	P07	ECH002-P07	P08	-0.0240536	0.0323625
Zhang-ECH002	P09	ECH002-P09	P09	0.0648679	-0.0124364
Zhang-ECH002	P09	ECH002-P09	P10	-0.0897407	-0.0124364
Zhang-ECH002	P11	ECH002-P11	P11	-0.0604106	-0.0192349
Zhang-ECH002	P11	ECH002-P11	P12	0.0219408	-0.0192349
Zhang-ECH002	P13	ECH002-P13	P13	0.0340994	0.0321789
Zhang-ECH002	P13	ECH002-P13	P14	0.0302584	0.0321789
Zhang-ECH002	P15	ECH002-P15	P15	0.0358714	0.0386796
Zhang-ECH002	P15	ECH002-P15	P16	0.0414878	0.0386796
Zhang-ECH002	P17	ECH002-P17	P17	0.0630411	0.0442164
Zhang-ECH002	P17	ECH002-P17	P18	0.0253916	0.0442164
Zhang-ECH002	P19	ECH002-P19	P19	0.0139829	0.0135062
Zhang-ECH002	P19	ECH002-P19	P20	0.0130295	0.0135062
Zhang-ECH002	P21	ECH002-P21	P21	0.178038	0.273738
Zhang-ECH002	P21	ECH002-P21	P22	0.369438	0.273738
Zhang-ECH003	A03	ECH003-A03	A03	0.275731	0.258712
Zhang-ECH003	A03	ECH003-A03	A04	0.241693	0.258712
Zhang-ECH003	A05	ECH003-A05	A05	0.204502	0.238204
Zhang-ECH003	A05	ECH003-A05	A06	0.271906	0.238204
Zhang-ECH003	A07	ECH003-A07	A07	0.224647	0.203975
Zhang-ECH003	A07	ECH003-A07	A08	0.183303	0.203975
Zhang-ECH003	A09	ECH003-A09	A09	0.138925	0.139066
Zhang-ECH003	A09	ECH003-A09	A10	0.139208	0.139066
Zhang-ECH003	A11	ECH003-A11	A11	0.138034	0.192955
Zhang-ECH003	A11	ECH003-A11	A12	0.247876	0.192955
Zhang-ECH003	A13	ECH003-A13	A13	0.689875	0.637494
Zhang-ECH003	A13	ECH003-A13	A14	0.585113	0.637494
Zhang-ECH003	A15	ECH003-A15	A15	0.0327388	0.00251869
Zhang-ECH003	A15	ECH003-A15	A16	-0.0277014	0.00251869
Zhang-ECH003	A17	ECH003-A17	A17	0.105867	0.141912
Zhang-ECH003	A17	ECH003-A17	A18	0.177957	0.141912
Zhang-ECH003	A19	ECH003-A19	A19	0.186037	0.170408
Zhang-ECH003	A19	ECH003-A19	A20	0.154779	0.170408
Zhang-ECH003	A21	ECH003-A21	A21	0.20809	0.206775
Zhang-ECH003	A21	ECH003-A21	A22	0.205461	0.206775
Zhang-ECH003	B03	ECH003-B03	B03	0.282049	0.265023
Zhang-ECH003	B03	ECH003-B03	B04	0.247997	0.265023
Zhang-ECH003	B05	ECH003-B05	B05	0.178706	0.192315
Zhang-ECH003	B05	ECH003-B05	B06	0.205925	0.192315
Zhang-ECH003	B07	ECH003-B07	B07	0.271208	0.25221
Zhang-ECH003	B07	ECH003-B07	B08	0.233212	0.25221
Zhang-ECH003	B09	ECH003-B09	B09	0.155244	0.104786
Zhang-ECH003	B09	ECH003-B09	B10	0.0543271	0.104786
Zhang-ECH003	B11	ECH003-B11	B11	0.424101	0.417488
Zhang-ECH003	B11	ECH003-B11	B12	0.410874	0.417488
Zhang-ECH003	B13	ECH003-B13	B13	0.0610523	0.11269
Zhang-ECH003	B13	ECH003-B13	B14	0.164329	0.11269
Zhang-ECH003	B15	ECH003-B15	B15	0.196266	0.185221
Zhang-ECH003	B15	ECH003-B15	B16	0.174176	0.185221
Zhang-ECH003	B17	ECH003-B17	B17	0.0815438	0.111055
Zhang-ECH003	B17	ECH003-B17	B18	0.140566	0.111055
Zhang-ECH003	B19	ECH003-B19	B19	0.107687	0.0860952
Zhang-ECH003	B19	ECH003-B19	B20	0.0645034	0.0860952
Zhang-ECH003	B21	ECH003-B21	B21	0.42439	0.410706
Zhang-ECH003	B21	ECH003-B21	B22	0.397021	0.410706
Zhang-ECH003	C03	ECH003-C03	C03	0.187767	0.17635
Zhang-ECH003	C03	ECH003-C03	C04	0.164933	0.17635
Zhang-ECH003	C05	ECH003-C05	C05	0.201854	0.247998
Zhang-ECH003	C05	ECH003-C05	C06	0.294142	0.247998
Zhang-ECH003	C07	ECH003-C07	C07	0.128774	0.124144
Zhang-ECH003	C07	ECH003-C07	C08	0.119513	0.124144
Zhang-ECH003	C09	ECH003-C09	C09	0.11156	0.133787
Zhang-ECH003	C09	ECH003-C09	C10	0.156015	0.133787
Zhang-ECH003	C11	ECH003-C11	C11	0.206822	0.202882
Zhang-ECH003	C11	ECH003-C11	C12	0.198942	0.202882
Zhang-ECH003	C13	ECH003-C13	C13	0.204123	0.160778
Zhang-ECH003	C13	ECH003-C13	C14	0.117433	0.160778
Zhang-ECH003	C15	ECH003-C15	C15	0.0722927	0.0725981
Zhang-ECH003	C15	ECH003-C15	C16	0.0729034	0.0725981
Zhang-ECH003	C17	ECH003-C17	C17	0.272595	0.320625
Zhang-ECH003	C17	ECH003-C17	C18	0.368655	0.320625
Zhang-ECH003	C19	ECH003-C19	C19	0.0856164	0.087885
Zhang-ECH003	C19	ECH003-C19	C20	0.0901536	0.087885
Zhang-ECH003	C21	ECH003-C21	C21	0.438763	0.409133
Zhang-ECH003	C21	ECH003-C21	C22	0.379502	0.409133
Zhang-ECH003	D03	ECH003-D03	D03	0.151558	0.16877
Zhang-ECH003	D03	ECH003-D03	D04	0.185981	0.16877
Zhang-ECH003	D05	ECH003-D05	D05	0.207511	0.218154
Zhang-ECH003	D05	ECH003-D05	D06	0.228798	0.218154
Zhang-ECH003	D07	ECH003-D07	D07	0.176017	0.136046
Zhang-ECH003	D07	ECH003-D07	D08	0.0960751	0.136046
Zhang-ECH003	D09	ECH003-D09	D09	0.102933	0.0970438
Zhang-ECH003	D09	ECH003-D09	D10	0.0911545	0.0970438
Zhang-ECH003	D11	ECH003-D11	D11	0.13796	0.145025
Zhang-ECH003	D11	ECH003-D11	D12	0.152089	0.145025
Zhang-ECH003	D13	ECH003-D13	D13	0.23237	0.180263
Zhang-ECH003	D13	ECH003-D13	D14	0.128155	0.180263
Zhang-ECH003	D15	ECH003-D15	D15	0.0751662	0.0917675
Zhang-ECH003	D15	ECH003-D15	D16	0.108369	0.0917675
Zhang-ECH003	D17	ECH003-D17	D17	0.059582	0.0972754
Zhang-ECH003	D17	ECH003-D17	D18	0.134969	0.0972754
Zhang-ECH003	D19	ECH003-D19	D19	0.24257	0.264046
Zhang-ECH003	D19	ECH003-D19	D20	0.285521	0.264046
Zhang-ECH003	D21	ECH003-D21	D21	0.281358	0.259315
Zhang-ECH003	D21	ECH003-D21	D22	0.237273	0.259315
Zhang-ECH003	E03	ECH003-E03	E03	0.228954	0.245451
Zhang-ECH003	E03	ECH003-E03	E04	0.261948	0.245451
Zhang-ECH003	E05	ECH003-E05	E05	0.157653	0.156057
Zhang-ECH003	E05	ECH003-E05	E06	0.15446	0.156057
Zhang-ECH003	E07	ECH003-E07	E07	0.150599	0.176398
Zhang-ECH003	E07	ECH003-E07	E08	0.202197	0.176398
Zhang-ECH003	E09	ECH003-E09	E09	0.195835	0.175765
Zhang-ECH003	E09	ECH003-E09	E10	0.155696	0.175765
Zhang-ECH003	E11	ECH003-E11	E11	-0.0377647	0.0769516
Zhang-ECH003	E11	ECH003-E11	E12	0.191668	0.0769516
Zhang-ECH003	E13	ECH003-E13	E13	0.168233	0.157952
Zhang-ECH003	E13	ECH003-E13	E14	0.147672	0.157952
Zhang-ECH003	E15	ECH003-E15	E15	0.34386	0.430342
Zhang-ECH003	E15	ECH003-E15	E16	0.516823	0.430342
Zhang-ECH003	E17	ECH003-E17	E17	0.249359	0.153383
Zhang-ECH003	E17	ECH003-E17	E18	0.0574071	0.153383
Zhang-ECH003	E19	ECH003-E19	E19	0.187264	0.162368
Zhang-ECH003	E19	ECH003-E19	E20	0.137471	0.162368
Zhang-ECH003	E21	ECH003-E21	E21	0.0496688	0.07681
Zhang-ECH003	E21	ECH003-E21	E22	0.103951	0.07681
Zhang-ECH003	F03	ECH003-F03	F03	0.132467	0.0750616
Zhang-ECH003	F03	ECH003-F03	F04	0.0176563	0.0750616
Zhang-ECH003	F05	ECH003-F05	F05	0.167653	0.222957
Zhang-ECH003	F05	ECH003-F05	F06	0.278262	0.222957
Zhang-ECH003	F07	ECH003-F07	F07	0.147895	0.0949392
Zhang-ECH003	F07	ECH003-F07	F08	0.0419834	0.0949392
Zhang-ECH003	F09	ECH003-F09	F09	0.106708	0.10453
Zhang-ECH003	F09	ECH003-F09	F10	0.102352	0.10453
Zhang-ECH003	F11	ECH003-F11	F11	0.0233923	0.0380746
Zhang-ECH003	F11	ECH003-F11	F12	0.052757	0.0380746
Zhang-ECH003	F13	ECH003-F13	F13	0.171593	0.188825
Zhang-ECH003	F13	ECH003-F13	F14	0.206057	0.188825
Zhang-ECH003	F15	ECH003-F15	F15	0.1985	0.182967
Zhang-ECH003	F15	ECH003-F15	F16	0.167434	0.182967
Zhang-ECH003	F17	ECH003-F17	F17	0.0362102	-0.0363833
Zhang-ECH003	F17	ECH003-F17	F18	-0.108977	-0.0363833
Zhang-ECH003	F19	ECH003-F19	F19	0.305365	0.186254
Zhang-ECH003	F19	ECH003-F19	F20	0.0671429	0.186254
Zhang-ECH003	F21	ECH003-F21	F21	0.14454	0.155671
Zhang-ECH003	F21	ECH003-F21	F22	0.166802	0.155671
Zhang-ECH003	G03	ECH003-G03	G03	0.199487	0.177732
Zhang-ECH003	G03	ECH003-G03	G04	0.155976	0.177732
Zhang-ECH003	G05	ECH003-G05	G05	0.0953434	0.119816
Zhang-ECH003	G05	ECH003-G05	G06	0.144288	0.119816
Zhang-ECH003	G07	ECH003-G07	G07	0.0335195	0.043508
Zhang-ECH003	G07	ECH003-G07	G08	0.0534966	0.043508
Zhang-ECH003	G09	ECH003-G09	G09	0.0588219	0.0390556
Zhang-ECH003	G09	ECH003-G09	G10	0.0192893	0.0390556
Zhang-ECH003	G11	ECH003-G11	G11	0.0123506	0.0519684
Zhang-ECH003	G11	ECH003-G11	G12	0.0915862	0.0519684
Zhang-ECH003	G13	ECH003-G13	G13	0.0419078	0.0354904
Zhang-ECH003	G13	ECH003-G13	G14	0.029073	0.0354904
Zhang-ECH003	G15	ECH003-G15	G15	0.131311	0.173181
Zhang-ECH003	G15	ECH003-G15	G16	0.215051	0.173181
Zhang-ECH003	G17	ECH003-G17	G17	-0.111652	-0.0500174
Zhang-ECH003	G17	ECH003-G17	G18	0.0116177	-0.0500174
Zhang-ECH003	G19	ECH003-G19	G19	-0.0816394	-0.0648863
Zhang-ECH003	G19	ECH003-G19	G20	-0.0481332	-0.0648863
Zhang-ECH003	G21	ECH003-G21	G21	-0.0397774	-0.0348346
Zhang-ECH003	G21	ECH003-G21	G22	-0.0298919	-0.0348346
Zhang-ECH003	H03	ECH003-H03	H03	0.273997	0.271437
Zhang-ECH003	H03	ECH003-H03	H04	0.268877	0.271437
Zhang-ECH003	H05	ECH003-H05	H05	0.0394931	0.0297277
Zhang-ECH003	H05	ECH003-H05	H06	0.0199623	0.0297277
Zhang-ECH003	H07	ECH003-H07	H07	0.0937124	0.074705
Zhang-ECH003	H07	ECH003-H07	H08	0.0556977	0.074705
Zhang-ECH003	H09	ECH003-H09	H09	0.0147039	0.0446551
Zhang-ECH003	H09	ECH003-H09	H10	0.0746064	0.0446551
Zhang-ECH003	H11	ECH003-H11	H11	-0.0197374	-0.0354378
Zhang-ECH003	H11	ECH003-H11	H12	-0.0511382	-0.0354378
Zhang-ECH003	H13	ECH003-H13	H13	0.265427	0.201202
Zhang-ECH003	H13	ECH003-H13	H14	0.136976	0.201202
Zhang-ECH003	H15	ECH003-H15	H15	0.126142	0.202971
Zhang-ECH003	H15	ECH003-H15	H16	0.279801	0.202971
Zhang-ECH003	H17	ECH003-H17	H17	0.381914	0.345256
Zhang-ECH003	H17	ECH003-H17	H18	0.308597	0.345256
Zhang-ECH003	H19	ECH003-H19	H19	-0.273105	-0.194324
Zhang-ECH003	H19	ECH003-H19	H20	-0.115543	-0.194324
Zhang-ECH003	H21	ECH003-H21	H21	-0.129328	-0.0957068
Zhang-ECH003	H21	ECH003-H21	H22	-0.0620854	-0.0957068
Zhang-ECH003	I03	ECH003-I03	I03	0.033849	0.0088407
Zhang-ECH003	I03	ECH003-I03	I04	-0.0161676	0.0088407
Zhang-ECH003	I05	ECH003-I05	I05	-0.042626	0.0364674
Zhang-ECH003	I05	ECH003-I05	I06	0.115561	0.0364674
Zhang-ECH003	I07	ECH003-I07	I07	0.020197	-0.0492285
Zhang-ECH003	I07	ECH003-I07	I08	-0.118654	-0.0492285
Zhang-ECH003	I09	ECH003-I09	I09	-0.0212999	0.0147914
Zhang-ECH003	I09	ECH003-I09	I10	0.0508828	0.0147914
Zhang-ECH003	I11	ECH003-I11	I11	0.153622	0.116041
Zhang-ECH003	I11	ECH003-I11	I12	0.0784588	0.116041
Zhang-ECH003	I13	ECH003-I13	I13	0.156036	0.134196
Zhang-ECH003	I13	ECH003-I13	I14	0.112356	0.134196
Zhang-ECH003	I15	ECH003-I15	I15	0.203322	0.189311
Zhang-ECH003	I15	ECH003-I15	I16	0.175301	0.189311
Zhang-ECH003	I17	ECH003-I17	I17	0.171064	0.189052
Zhang-ECH003	I17	ECH003-I17	I18	0.207039	0.189052
Zhang-ECH003	I19	ECH003-I19	I19	0.464746	0.425834
Zhang-ECH003	I19	ECH003-I19	I20	0.386922	0.425834
Zhang-ECH003	I21	ECH003-I21	I21	-0.074258	-0.0239322
Zhang-ECH003	I21	ECH003-I21	I22	0.0263937	-0.0239322
Zhang-ECH003	J03	ECH003-J03	J03	0.166855	0.120351
Zhang-ECH003	J03	ECH003-J03	J04	0.0738479	0.120351
Zhang-ECH003	J05	ECH003-J05	J05	0.0714046	0.0651809
Zhang-ECH003	J05	ECH003-J05	J06	0.0589572	0.0651809
Zhang-ECH003	J07	ECH003-J07	J07	-0.0330027	0.0174538
Zhang-ECH003	J07	ECH003-J07	J08	0.0679103	0.0174538
Zhang-ECH003	J09	ECH003-J09	J09	-0.0143119	0.0174985
Zhang-ECH003	J09	ECH003-J09	J10	0.0493089	0.0174985
Zhang-ECH003	J11	ECH003-J11	J11	0.0593859	0.0124506
Zhang-ECH003	J11	ECH003-J11	J12	-0.0344847	0.0124506
Zhang-ECH003	J13	ECH003-J13	J13	0.140508	0.113832
Zhang-ECH003	J13	ECH003-J13	J14	0.0871556	0.113832
Zhang-ECH003	J15	ECH003-J15	J15	0.051209	0.0617466
Zhang-ECH003	J15	ECH003-J15	J16	0.0722843	0.0617466
Zhang-ECH003	J17	ECH003-J17	J17	0.143616	0.11221
Zhang-ECH003	J17	ECH003-J17	J18	0.0808041	0.11221
Zhang-ECH003	J19	ECH003-J19	J19	0.133684	0.105708
Zhang-ECH003	J19	ECH003-J19	J20	0.0777325	0.105708
Zhang-ECH003	J21	ECH003-J21	J21	-0.0954632	-0.0911405
Zhang-ECH003	J21	ECH003-J21	J22	-0.0868179	-0.0911405
Zhang-ECH003	K03	ECH003-K03	K03	0.111072	0.142051
Zhang-ECH003	K03	ECH003-K03	K04	0.173029	0.142051
Zhang-ECH003	K05	ECH003-K05	K05	0.0719529	0.0683905
Zhang-ECH003	K05	ECH003-K05	K06	0.0648281	0.0683905
Zhang-ECH003	K07	ECH003-K07	K07	0.102199	0.081119
Zhang-ECH003	K07	ECH003-K07	K08	0.0600385	0.081119
Zhang-ECH003	K09	ECH003-K09	K09	0.215155	0.252408
Zhang-ECH003	K09	ECH003-K09	K10	0.289661	0.252408
Zhang-ECH003	K11	ECH003-K11	K11	0.0990249	0.0925893
Zhang-ECH003	K11	ECH003-K11	K12	0.0861537	0.0925893
Zhang-ECH003	K13	ECH003-K13	K13	0.0968112	0.11944
Zhang-ECH003	K13	ECH003-K13	K14	0.142069	0.11944
Zhang-ECH003	K15	ECH003-K15	K15	0.0563033	0.0726058
Zhang-ECH003	K15	ECH003-K15	K16	0.0889083	0.0726058
Zhang-ECH003	K17	ECH003-K17	K17	0.0491992	0.0353549
Zhang-ECH003	K17	ECH003-K17	K18	0.0215106	0.0353549
Zhang-ECH003	K19	ECH003-K19	K19	0.00592182	0.105118
Zhang-ECH003	K19	ECH003-K19	K20	0.204314	0.105118
Zhang-ECH003	K21	ECH003-K21	K21	-0.159919	-0.111686
Zhang-ECH003	K21	ECH003-K21	K22	-0.0634523	-0.111686
Zhang-ECH003	L03	ECH003-L03	L03	0.333605	0.335913
Zhang-ECH003	L03	ECH003-L03	L04	0.338221	0.335913
Zhang-ECH003	L05	ECH003-L05	L05	0.342834	0.301687
Zhang-ECH003	L05	ECH003-L05	L06	0.260541	0.301687
Zhang-ECH003	L07	ECH003-L07	L07	0.208357	0.227774
Zhang-ECH003	L07	ECH003-L07	L08	0.247191	0.227774
Zhang-ECH003	L09	ECH003-L09	L09	0.194808	0.183762
Zhang-ECH003	L09	ECH003-L09	L10	0.172717	0.183762
Zhang-ECH003	L11	ECH003-L11	L11	0.0876236	0.0956435
Zhang-ECH003	L11	ECH003-L11	L12	0.103663	0.0956435
Zhang-ECH003	L13	ECH003-L13	L13	0.0270186	0.0559846
Zhang-ECH003	L13	ECH003-L13	L14	0.0849505	0.0559846
Zhang-ECH003	L15	ECH003-L15	L15	0.319033	0.29862
Zhang-ECH003	L15	ECH003-L15	L16	0.278208	0.29862
Zhang-ECH003	L17	ECH003-L17	L17	0.0294214	0.0869097
Zhang-ECH003	L17	ECH003-L17	L18	0.144398	0.0869097
Zhang-ECH003	L19	ECH003-L19	L19	0.26381	0.14242
Zhang-ECH003	L19	ECH003-L19	L20	0.0210306	0.14242
Zhang-ECH003	L21	ECH003-L21	L21	0.118863	0.0747115
Zhang-ECH003	L21	ECH003-L21	L22	0.0305601	0.0747115
Zhang-ECH003	M03	ECH003-M03	M03	0.328137	0.299001
Zhang-ECH003	M03	ECH003-M03	M04	0.269866	0.299001
Zhang-ECH003	M05	ECH003-M05	M05	0.297339	0.289127
Zhang-ECH003	M05	ECH003-M05	M06	0.280915	0.289127
Zhang-ECH003	M07	ECH003-M07	M07	0.269203	0.256298
Zhang-ECH003	M07	ECH003-M07	M08	0.243392	0.256298
Zhang-ECH003	M09	ECH003-M09	M09	0.195228	0.240454
Zhang-ECH003	M09	ECH003-M09	M10	0.285681	0.240454
Zhang-ECH003	M11	ECH003-M11	M11	0.524127	0.49834
Zhang-ECH003	M11	ECH003-M11	M12	0.472552	0.49834
Zhang-ECH003	M13	ECH003-M13	M13	0.373197	0.346848
Zhang-ECH003	M13	ECH003-M13	M14	0.320499	0.346848
Zhang-ECH003	M15	ECH003-M15	M15	0.336564	0.339725
Zhang-ECH003	M15	ECH003-M15	M16	0.342886	0.339725
Zhang-ECH003	M17	ECH003-M17	M17	0.270458	0.22299
Zhang-ECH003	M17	ECH003-M17	M18	0.175521	0.22299
Zhang-ECH003	M19	ECH003-M19	M19	0.267991	0.158864
Zhang-ECH003	M19	ECH003-M19	M20	0.0497372	0.158864
Zhang-ECH003	M21	ECH003-M21	M21	0.0325622	0.0998966
Zhang-ECH003	M21	ECH003-M21	M22	0.167231	0.0998966
Zhang-ECH003	N03	ECH003-N03	N03	0.427647	0.441977
Zhang-ECH003	N03	ECH003-N03	N04	0.456307	0.441977
Zhang-ECH003	N05	ECH003-N05	N05	0.332317	0.340887
Zhang-ECH003	N05	ECH003-N05	N06	0.349457	0.340887
Zhang-ECH003	N07	ECH003-N07	N07	0.356814	0.399821
Zhang-ECH003	N07	ECH003-N07	N08	0.442828	0.399821
Zhang-ECH003	N09	ECH003-N09	N09	0.379504	0.380738
Zhang-ECH003	N09	ECH003-N09	N10	0.381972	0.380738
Zhang-ECH003	N11	ECH003-N11	N11	0.633655	0.601545
Zhang-ECH003	N11	ECH003-N11	N12	0.569435	0.601545
Zhang-ECH003	N13	ECH003-N13	N13	0.273161	0.277685
Zhang-ECH003	N13	ECH003-N13	N14	0.282209	0.277685
Zhang-ECH003	N15	ECH003-N15	N15	0.517984	0.50493
Zhang-ECH003	N15	ECH003-N15	N16	0.491875	0.50493
Zhang-ECH003	N17	ECH003-N17	N17	0.416333	0.448661
Zhang-ECH003	N17	ECH003-N17	N18	0.480989	0.448661
Zhang-ECH003	N19	ECH003-N19	N19	0.178421	0.197506
Zhang-ECH003	N19	ECH003-N19	N20	0.216591	0.197506
Zhang-ECH003	N21	ECH003-N21	N21	-0.0123729	0.012139
Zhang-ECH003	N21	ECH003-N21	N22	0.0366509	0.012139
Zhang-ECH003	O03	ECH003-O03	O03	0.305071	0.249274
Zhang-ECH003	O03	ECH003-O03	O04	0.193478	0.249274
Zhang-ECH003	O05	ECH003-O05	O05	0.230029	0.275209
Zhang-ECH003	O05	ECH003-O05	O06	0.32039	0.275209
Zhang-ECH003	O07	ECH003-O07	O07	0.31521	0.300379
Zhang-ECH003	O07	ECH003-O07	O08	0.285548	0.300379
Zhang-ECH003	O09	ECH003-O09	O09	0.287043	0.302424
Zhang-ECH003	O09	ECH003-O09	O10	0.317805	0.302424
Zhang-ECH003	O11	ECH003-O11	O11	0.548064	0.53528
Zhang-ECH003	O11	ECH003-O11	O12	0.522496	0.53528
Zhang-ECH003	O13	ECH003-O13	O13	0.280682	0.28083
Zhang-ECH003	O13	ECH003-O13	O14	0.280979	0.28083
Zhang-ECH003	O15	ECH003-O15	O15	0.373843	0.358944
Zhang-ECH003	O15	ECH003-O15	O16	0.344044	0.358944
Zhang-ECH003	O17	ECH003-O17	O17	0.117137	0.122469
Zhang-ECH003	O17	ECH003-O17	O18	0.127802	0.122469
Zhang-ECH003	O19	ECH003-O19	O19	0.109312	0.0970928
Zhang-ECH003	O19	ECH003-O19	O20	0.0848732	0.0970928
Zhang-ECH003	O21	ECH003-O21	O21	0.0977537	0.107152
Zhang-ECH003	O21	ECH003-O21	O22	0.11655	0.107152
Zhang-ECH003	P03	ECH003-P03	P03	0.431119	0.397637
Zhang-ECH003	P03	ECH003-P03	P04	0.364154	0.397637
Zhang-ECH003	P05	ECH003-P05	P05	0.17814	0.205477
Zhang-ECH003	P05	ECH003-P05	P06	0.232815	0.205477
Zhang-ECH003	P07	ECH003-P07	P07	0.368548	0.36182
Zhang-ECH003	P07	ECH003-P07	P08	0.355092	0.36182
Zhang-ECH003	P09	ECH003-P09	P09	0.270977	0.299808
Zhang-ECH003	P09	ECH003-P09	P10	0.328639	0.299808
Zhang-ECH003	P11	ECH003-P11	P11	0.602182	0.579929
Zhang-ECH003	P11	ECH003-P11	P12	0.557676	0.579929
Zhang-ECH003	P13	ECH003-P13	P13	0.255291	0.242555
Zhang-ECH003	P13	ECH003-P13	P14	0.229819	0.242555
Zhang-ECH003	P15	ECH003-P15	P15	0.295165	0.282765
Zhang-ECH003	P15	ECH003-P15	P16	0.270365	0.282765
Zhang-ECH003	P17	ECH003-P17	P17	0.213834	0.163819
Zhang-ECH003	P17	ECH003-P17	P18	0.113803	0.163819
Zhang-ECH003	P19	ECH003-P19	P19	0.247198	0.28111
Zhang-ECH003	P19	ECH003-P19	P20	0.315022	0.28111
Zhang-ECH003	P21	ECH003-P21	P21	0.207326	0.216531
Zhang-ECH003	P21	ECH003-P21	P22	0.225736	0.216531
Zhang-ECH004	A03	ECH004-A03	A03	-0.0158283	-0.0176534
Zhang-ECH004	A03	ECH004-A03	A04	-0.0194785	-0.0176534
Zhang-ECH004	A05	ECH004-A05	A05	-0.000649693	-0.0104464
Zhang-ECH004	A05	ECH004-A05	A06	-0.0202431	-0.0104464
Zhang-ECH004	A07	ECH004-A07	A07	0.0265247	-0.0113605
Zhang-ECH004	A07	ECH004-A07	A08	-0.0492456	-0.0113605
Zhang-ECH004	A09	ECH004-A09	A09	-0.182321	-0.0945618
Zhang-ECH004	A09	ECH004-A09	A10	-0.00680293	-0.0945618
Zhang-ECH004	A11	ECH004-A11	A11	0.0757454	0.0203897
Zhang-ECH004	A11	ECH004-A11	A12	-0.0349659	0.0203897
Zhang-ECH004	A13	ECH004-A13	A13	0.054736	0.0320981
Zhang-ECH004	A13	ECH004-A13	A14	0.00946027	0.0320981
Zhang-ECH004	A15	ECH004-A15	A15	-0.229579	-0.0782167
Zhang-ECH004	A15	ECH004-A15	A16	0.0731459	-0.0782167
Zhang-ECH004	A17	ECH004-A17	A17	-0.113588	-0.147067
Zhang-ECH004	A17	ECH004-A17	A18	-0.180546	-0.147067
Zhang-ECH004	A19	ECH004-A19	A19	-2.0727	-1.27826
Zhang-ECH004	A19	ECH004-A19	A20	-0.483823	-1.27826
Zhang-ECH004	A21	ECH004-A21	A21	0	-0.122376
Zhang-ECH004	A21	ECH004-A21	A22	-0.122376	-0.122376
Zhang-ECH004	B03	ECH004-B03	B03	0.0631428	0.0022966
Zhang-ECH004	B03	ECH004-B03	B04	-0.0585496	0.0022966
Zhang-ECH004	B05	ECH004-B05	B05	-0.00444453	0.0046457
Zhang-ECH004	B05	ECH004-B05	B06	0.0137359	0.0046457
Zhang-ECH004	B07	ECH004-B07	B07	0.111046	0.0757434
Zhang-ECH004	B07	ECH004-B07	B08	0.0404407	0.0757434
Zhang-ECH004	B09	ECH004-B09	B09	-0.000850672	-0.0202425
Zhang-ECH004	B09	ECH004-B09	B10	-0.0396342	-0.0202425
Zhang-ECH004	B11	ECH004-B11	B11	0.000339874	-0.0273239
Zhang-ECH004	B11	ECH004-B11	B12	-0.0549876	-0.0273239
Zhang-ECH004	B13	ECH004-B13	B13	0.307461	0.283639
Zhang-ECH004	B13	ECH004-B13	B14	0.259816	0.283639
Zhang-ECH004	B15	ECH004-B15	B15	0.0792607	0.063466
Zhang-ECH004	B15	ECH004-B15	B16	0.0476713	0.063466
Zhang-ECH004	B17	ECH004-B17	B17	-0.0893097	-0.140705
Zhang-ECH004	B17	ECH004-B17	B18	-0.1921	-0.140705
Zhang-ECH004	B19	ECH004-B19	B19	-0.142154	-0.127641
Zhang-ECH004	B19	ECH004-B19	B20	-0.113128	-0.127641
Zhang-ECH004	B21	ECH004-B21	B21	0	-0.378663
Zhang-ECH004	B21	ECH004-B21	B22	-0.378663	-0.378663
Zhang-ECH004	C03	ECH004-C03	C03	0.0426693	0.0286237
Zhang-ECH004	C03	ECH004-C03	C04	0.0145781	0.0286237
Zhang-ECH004	C05	ECH004-C05	C05	0.0830606	0.102123
Zhang-ECH004	C05	ECH004-C05	C06	0.121186	0.102123
Zhang-ECH004	C07	ECH004-C07	C07	0.121032	0.103305
Zhang-ECH004	C07	ECH004-C07	C08	0.0855779	0.103305
Zhang-ECH004	C09	ECH004-C09	C09	0.223902	0.179858
Zhang-ECH004	C09	ECH004-C09	C10	0.135815	0.179858
Zhang-ECH004	C11	ECH004-C11	C11	0.167562	0.102461
Zhang-ECH004	C11	ECH004-C11	C12	0.0373601	0.102461
Zhang-ECH004	C13	ECH004-C13	C13	0.257032	0.215746
Zhang-ECH004	C13	ECH004-C13	C14	0.17446	0.215746
Zhang-ECH004	C15	ECH004-C15	C15	0.101867	0.0698768
Zhang-ECH004	C15	ECH004-C15	C16	0.0378863	0.0698768
Zhang-ECH004	C17	ECH004-C17	C17	-0.0210712	-0.051094
Zhang-ECH004	C17	ECH004-C17	C18	-0.0811168	-0.051094
Zhang-ECH004	C19	ECH004-C19	C19	-0.153289	-0.126988
Zhang-ECH004	C19	ECH004-C19	C20	-0.100687	-0.126988
Zhang-ECH004	C21	ECH004-C21	C21	0	-0.241549
Zhang-ECH004	C21	ECH004-C21	C22	-0.241549	-0.241549
Zhang-ECH004	D03	ECH004-D03	D03	-0.117967	-0.0632196
Zhang-ECH004	D03	ECH004-D03	D04	-0.00847219	-0.0632196
Zhang-ECH004	D05	ECH004-D05	D05	0.0535631	0.038633
Zhang-ECH004	D05	ECH004-D05	D06	0.0237029	0.038633
Zhang-ECH004	D07	ECH004-D07	D07	-0.130317	-0.0713152
Zhang-ECH004	D07	ECH004-D07	D08	-0.0123136	-0.0713152
Zhang-ECH004	D09	ECH004-D09	D09	0.0965958	0.0952185
Zhang-ECH004	D09	ECH004-D09	D10	0.0938412	0.0952185
Zhang-ECH004	D11	ECH004-D11	D11	-0.0307601	-0.0393628
Zhang-ECH004	D11	ECH004-D11	D12	-0.0479655	-0.0393628
Zhang-ECH004	D13	ECH004-D13	D13	0.283931	0.289536
Zhang-ECH004	D13	ECH004-D13	D14	0.295142	0.289536
Zhang-ECH004	D15	ECH004-D15	D15	-0.0399508	0.0623827
Zhang-ECH004	D15	ECH004-D15	D16	0.164716	0.0623827
Zhang-ECH004	D17	ECH004-D17	D17	-0.0551173	-0.072175
Zhang-ECH004	D17	ECH004-D17	D18	-0.0892328	-0.072175
Zhang-ECH004	D19	ECH004-D19	D19	-0.121869	-0.121895
Zhang-ECH004	D19	ECH004-D19	D20	-0.121921	-0.121895
Zhang-ECH004	D21	ECH004-D21	D21	0	0.319003
Zhang-ECH004	D21	ECH004-D21	D22	0.319003	0.319003
Zhang-ECH004	E03	ECH004-E03	E03	0.0294475	-0.0431975
Zhang-ECH004	E03	ECH004-E03	E04	-0.115843	-0.0431975
Zhang-ECH004	E05	ECH004-E05	E05	-0.174447	-0.155784
Zhang-ECH004	E05	ECH004-E05	E06	-0.137122	-0.155784
Zhang-ECH004	E07	ECH004-E07	E07	0.0236031	-0.0135771
Zhang-ECH004	E07	ECH004-E07	E08	-0.0507573	-0.0135771
Zhang-ECH004	E09	ECH004-E09	E09	0.157163	0.137302
Zhang-ECH004	E09	ECH004-E09	E10	0.117442	0.137302
Zhang-ECH004	E11	ECH004-E11	E11	0.0422694	0.031031
Zhang-ECH004	E11	ECH004-E11	E12	0.0197927	0.031031
Zhang-ECH004	E13	ECH004-E13	E13	0.222331	0.106437
Zhang-ECH004	E13	ECH004-E13	E14	-0.00945772	0.106437
Zhang-ECH004	E15	ECH004-E15	E15	0.208104	0.237991
Zhang-ECH004	E15	ECH004-E15	E16	0.267878	0.237991
Zhang-ECH004	E17	ECH004-E17	E17	0.00318866	-0.0536801
Zhang-ECH004	E17	ECH004-E17	E18	-0.110549	-0.0536801
Zhang-ECH004	E19	ECH004-E19	E19	-0.0772919	-0.0679663
Zhang-ECH004	E19	ECH004-E19	E20	-0.0586408	-0.0679663
Zhang-ECH004	E21	ECH004-E21	E21	0	-0.000310838
Zhang-ECH004	E21	ECH004-E21	E22	-0.000310838	-0.000310838
Zhang-ECH004	F03	ECH004-F03	F03	0.0847874	0.0946308
Zhang-ECH004	F03	ECH004-F03	F04	0.104474	0.0946308
Zhang-ECH004	F05	ECH004-F05	F05	0.0922939	0.0669245
Zhang-ECH004	F05	ECH004-F05	F06	0.0415551	0.0669245
Zhang-ECH004	F07	ECH004-F07	F07	0.162554	0.123106
Zhang-ECH004	F07	ECH004-F07	F08	0.0836571	0.123106
Zhang-ECH004	F09	ECH004-F09	F09	0.00685595	0.0872681
Zhang-ECH004	F09	ECH004-F09	F10	0.16768	0.0872681
Zhang-ECH004	F11	ECH004-F11	F11	-0.0202964	-0.0381576
Zhang-ECH004	F11	ECH004-F11	F12	-0.0560188	-0.0381576
Zhang-ECH004	F13	ECH004-F13	F13	0.454531	0.377474
Zhang-ECH004	F13	ECH004-F13	F14	0.300417	0.377474
Zhang-ECH004	F15	ECH004-F15	F15	0.203918	0.17923
Zhang-ECH004	F15	ECH004-F15	F16	0.154541	0.17923
Zhang-ECH004	F17	ECH004-F17	F17	0.11821	0.0805209
Zhang-ECH004	F17	ECH004-F17	F18	0.0428323	0.0805209
Zhang-ECH004	F19	ECH004-F19	F19	-0.0108862	-0.0390556
Zhang-ECH004	F19	ECH004-F19	F20	-0.0672251	-0.0390556
Zhang-ECH004	F21	ECH004-F21	F21	0	-0.169613
Zhang-ECH004	F21	ECH004-F21	F22	-0.169613	-0.169613
Zhang-ECH004	G03	ECH004-G03	G03	0.0114313	0.0342781
Zhang-ECH004	G03	ECH004-G03	G04	0.057125	0.0342781
Zhang-ECH004	G05	ECH004-G05	G05	0.0171867	0.0207992
Zhang-ECH004	G05	ECH004-G05	G06	0.0244117	0.0207992
Zhang-ECH004	G07	ECH004-G07	G07	0.0684386	0.0573318
Zhang-ECH004	G07	ECH004-G07	G08	0.0462249	0.0573318
Zhang-ECH004	G09	ECH004-G09	G09	-0.00285186	0.0102768
Zhang-ECH004	G09	ECH004-G09	G10	0.0234055	0.0102768
Zhang-ECH004	G11	ECH004-G11	G11	-0.0707772	-0.0147194
Zhang-ECH004	G11	ECH004-G11	G12	0.0413384	-0.0147194
Zhang-ECH004	G13	ECH004-G13	G13	0.230496	0.157213
Zhang-ECH004	G13	ECH004-G13	G14	0.0839301	0.157213
Zhang-ECH004	G15	ECH004-G15	G15	0.209696	0.171695
Zhang-ECH004	G15	ECH004-G15	G16	0.133694	0.171695
Zhang-ECH004	G17	ECH004-G17	G17	-0.100857	-0.0923697
Zhang-ECH004	G17	ECH004-G17	G18	-0.0838828	-0.0923697
Zhang-ECH004	G19	ECH004-G19	G19	-0.0513586	-0.0779255
Zhang-ECH004	G19	ECH004-G19	G20	-0.104492	-0.0779255
Zhang-ECH004	G21	ECH004-G21	G21	0	-0.0498324
Zhang-ECH004	G21	ECH004-G21	G22	-0.0498324	-0.0498324
Zhang-ECH004	H03	ECH004-H03	H03	0.0980046	0.0770436
Zhang-ECH004	H03	ECH004-H03	H04	0.0560826	0.0770436
Zhang-ECH004	H05	ECH004-H05	H05	0.196049	0.238576
Zhang-ECH004	H05	ECH004-H05	H06	0.281103	0.238576
Zhang-ECH004	H07	ECH004-H07	H07	0.175337	0.20022
Zhang-ECH004	H07	ECH004-H07	H08	0.225103	0.20022
Zhang-ECH004	H09	ECH004-H09	H09	0.0847654	0.0928781
Zhang-ECH004	H09	ECH004-H09	H10	0.100991	0.0928781
Zhang-ECH004	H11	ECH004-H11	H11	0.14448	0.126903
Zhang-ECH004	H11	ECH004-H11	H12	0.109326	0.126903
Zhang-ECH004	H13	ECH004-H13	H13	0.216231	0.169657
Zhang-ECH004	H13	ECH004-H13	H14	0.123083	0.169657
Zhang-ECH004	H15	ECH004-H15	H15	0.163273	0.20371
Zhang-ECH004	H15	ECH004-H15	H16	0.244147	0.20371
Zhang-ECH004	H17	ECH004-H17	H17	0.0341197	0.0108522
Zhang-ECH004	H17	ECH004-H17	H18	-0.0124154	0.0108522
Zhang-ECH004	H19	ECH004-H19	H19	0.00525785	0.0179865
Zhang-ECH004	H19	ECH004-H19	H20	0.0307152	0.0179865
Zhang-ECH004	H21	ECH004-H21	H21	0	0.023401
Zhang-ECH004	H21	ECH004-H21	H22	0.023401	0.023401
Zhang-ECH004	I03	ECH004-I03	I03	0.0174211	0.0263062
Zhang-ECH004	I03	ECH004-I03	I04	0.0351913	0.0263062
Zhang-ECH004	I05	ECH004-I05	I05	-0.00521368	0.00305932
Zhang-ECH004	I05	ECH004-I05	I06	0.0113323	0.00305932
Zhang-ECH004	I07	ECH004-I07	I07	0.106151	0.0962562
Zhang-ECH004	I07	ECH004-I07	I08	0.0863618	0.0962562
Zhang-ECH004	I09	ECH004-I09	I09	0.241297	0.231386
Zhang-ECH004	I09	ECH004-I09	I10	0.221474	0.231386
Zhang-ECH004	I11	ECH004-I11	I11	0.0743209	0.0844538
Zhang-ECH004	I11	ECH004-I11	I12	0.0945867	0.0844538
Zhang-ECH004	I13	ECH004-I13	I13	0.385428	0.375296
Zhang-ECH004	I13	ECH004-I13	I14	0.365164	0.375296
Zhang-ECH004	I15	ECH004-I15	I15	0.152107	0.203489
Zhang-ECH004	I15	ECH004-I15	I16	0.254871	0.203489
Zhang-ECH004	I17	ECH004-I17	I17	-0.173155	-0.127499
Zhang-ECH004	I17	ECH004-I17	I18	-0.0818435	-0.127499
Zhang-ECH004	I19	ECH004-I19	I19	-0.0314691	-0.0196931
Zhang-ECH004	I19	ECH004-I19	I20	-0.0079171	-0.0196931
Zhang-ECH004	I21	ECH004-I21	I21	0	-0.00206084
Zhang-ECH004	I21	ECH004-I21	I22	-0.00206084	-0.00206084
Zhang-ECH004	J03	ECH004-J03	J03	0.0240238	0.0279918
Zhang-ECH004	J03	ECH004-J03	J04	0.0319599	0.0279918
Zhang-ECH004	J05	ECH004-J05	J05	0.109094	0.100423
Zhang-ECH004	J05	ECH004-J05	J06	0.0917524	0.100423
Zhang-ECH004	J07	ECH004-J07	J07	0.0510614	0.0460814
Zhang-ECH004	J07	ECH004-J07	J08	0.0411013	0.0460814
Zhang-ECH004	J09	ECH004-J09	J09	0.0639717	0.0722721
Zhang-ECH004	J09	ECH004-J09	J10	0.0805726	0.0722721
Zhang-ECH004	J11	ECH004-J11	J11	0.0170649	0.0211337
Zhang-ECH004	J11	ECH004-J11	J12	0.0252025	0.0211337
Zhang-ECH004	J13	ECH004-J13	J13	0.456569	0.456678
Zhang-ECH004	J13	ECH004-J13	J14	0.456787	0.456678
Zhang-ECH004	J15	ECH004-J15	J15	0.348371	0.290422
Zhang-ECH004	J15	ECH004-J15	J16	0.232473	0.290422
Zhang-ECH004	J17	ECH004-J17	J17	-0.0113578	-0.0564689
Zhang-ECH004	J17	ECH004-J17	J18	-0.10158	-0.0564689
Zhang-ECH004	J19	ECH004-J19	J19	-0.024691	-0.038475
Zhang-ECH004	J19	ECH004-J19	J20	-0.052259	-0.038475
Zhang-ECH004	J21	ECH004-J21	J21	0	-0.0911575
Zhang-ECH004	J21	ECH004-J21	J22	-0.0911575	-0.0911575
Zhang-ECH004	K03	ECH004-K03	K03	0.00547581	-0.00332426
Zhang-ECH004	K03	ECH004-K03	K04	-0.0121243	-0.00332426
Zhang-ECH004	K05	ECH004-K05	K05	-0.000935821	-0.0250422
Zhang-ECH004	K05	ECH004-K05	K06	-0.0491486	-0.0250422
Zhang-ECH004	K07	ECH004-K07	K07	0.0305144	-0.0144066
Zhang-ECH004	K07	ECH004-K07	K08	-0.0593275	-0.0144066
Zhang-ECH004	K09	ECH004-K09	K09	0.0811791	0.228573
Zhang-ECH004	K09	ECH004-K09	K10	0.375966	0.228573
Zhang-ECH004	K11	ECH004-K11	K11	0.186452	0.167882
Zhang-ECH004	K11	ECH004-K11	K12	0.149312	0.167882
Zhang-ECH004	K13	ECH004-K13	K13	0.383315	0.325489
Zhang-ECH004	K13	ECH004-K13	K14	0.267663	0.325489
Zhang-ECH004	K15	ECH004-K15	K15	0.376633	0.312906
Zhang-ECH004	K15	ECH004-K15	K16	0.24918	0.312906
Zhang-ECH004	K17	ECH004-K17	K17	-0.0384275	-0.0418107
Zhang-ECH004	K17	ECH004-K17	K18	-0.0451939	-0.0418107
Zhang-ECH004	K19	ECH004-K19	K19	-0.122205	-0.0960845
Zhang-ECH004	K19	ECH004-K19	K20	-0.0699642	-0.0960845
Zhang-ECH004	K21	ECH004-K21	K21	0	-0.0384382
Zhang-ECH004	K21	ECH004-K21	K22	-0.0384382	-0.0384382
Zhang-ECH004	L03	ECH004-L03	L03	0.109265	0.0848004
Zhang-ECH004	L03	ECH004-L03	L04	0.0603364	0.0848004
Zhang-ECH004	L05	ECH004-L05	L05	0.276264	0.291808
Zhang-ECH004	L05	ECH004-L05	L06	0.307352	0.291808
Zhang-ECH004	L07	ECH004-L07	L07	0.168678	0.187523
Zhang-ECH004	L07	ECH004-L07	L08	0.206367	0.187523
Zhang-ECH004	L09	ECH004-L09	L09	0.113821	0.0135677
Zhang-ECH004	L09	ECH004-L09	L10	-0.0866856	0.0135677
Zhang-ECH004	L11	ECH004-L11	L11	0.0681133	0.0448279
Zhang-ECH004	L11	ECH004-L11	L12	0.0215426	0.0448279
Zhang-ECH004	L13	ECH004-L13	L13	0.2102	0.230696
Zhang-ECH004	L13	ECH004-L13	L14	0.251191	0.230696
Zhang-ECH004	L15	ECH004-L15	L15	0.241363	0.131433
Zhang-ECH004	L15	ECH004-L15	L16	0.0215033	0.131433
Zhang-ECH004	L17	ECH004-L17	L17	-0.0279413	-0.024512
Zhang-ECH004	L17	ECH004-L17	L18	-0.0210827	-0.024512
Zhang-ECH004	L19	ECH004-L19	L19	-0.062354	-0.0758508
Zhang-ECH004	L19	ECH004-L19	L20	-0.0893476	-0.0758508
Zhang-ECH004	L21	ECH004-L21	L21	0	0.0515442
Zhang-ECH004	L21	ECH004-L21	L22	0.0515442	0.0515442
Zhang-ECH004	M03	ECH004-M03	M03	0.118493	0.0778956
Zhang-ECH004	M03	ECH004-M03	M04	0.0372984	0.0778956
Zhang-ECH004	M05	ECH004-M05	M05	0.231021	0.239744
Zhang-ECH004	M05	ECH004-M05	M06	0.248466	0.239744
Zhang-ECH004	M07	ECH004-M07	M07	0.192183	0.21784
Zhang-ECH004	M07	ECH004-M07	M08	0.243498	0.21784
Zhang-ECH004	M09	ECH004-M09	M09	0.0651128	0.0339235
Zhang-ECH004	M09	ECH004-M09	M10	0.00273414	0.0339235
Zhang-ECH004	M11	ECH004-M11	M11	-0.0188471	-0.0194908
Zhang-ECH004	M11	ECH004-M11	M12	-0.0201344	-0.0194908
Zhang-ECH004	M13	ECH004-M13	M13	0.309315	0.325616
Zhang-ECH004	M13	ECH004-M13	M14	0.341916	0.325616
Zhang-ECH004	M15	ECH004-M15	M15	0.128724	0.0833402
Zhang-ECH004	M15	ECH004-M15	M16	0.037956	0.0833402
Zhang-ECH004	M17	ECH004-M17	M17	-0.108907	-0.0944838
Zhang-ECH004	M17	ECH004-M17	M18	-0.0800602	-0.0944838
Zhang-ECH004	M19	ECH004-M19	M19	-0.113108	-0.11605
Zhang-ECH004	M19	ECH004-M19	M20	-0.118992	-0.11605
Zhang-ECH004	M21	ECH004-M21	M21	0	-0.125008
Zhang-ECH004	M21	ECH004-M21	M22	-0.125008	-0.125008
Zhang-ECH004	N03	ECH004-N03	N03	0.052036	0.0531785
Zhang-ECH004	N03	ECH004-N03	N04	0.0543211	0.0531785
Zhang-ECH004	N05	ECH004-N05	N05	-0.0451973	-0.0533955
Zhang-ECH004	N05	ECH004-N05	N06	-0.0615937	-0.0533955
Zhang-ECH004	N07	ECH004-N07	N07	0.135175	0.11217
Zhang-ECH004	N07	ECH004-N07	N08	0.0891655	0.11217
Zhang-ECH004	N09	ECH004-N09	N09	0.0746175	0.101787
Zhang-ECH004	N09	ECH004-N09	N10	0.128956	0.101787
Zhang-ECH004	N11	ECH004-N11	N11	0.151678	0.157356
Zhang-ECH004	N11	ECH004-N11	N12	0.163035	0.157356
Zhang-ECH004	N13	ECH004-N13	N13	-0.136063	-0.075945
Zhang-ECH004	N13	ECH004-N13	N14	-0.0158274	-0.075945
Zhang-ECH004	N15	ECH004-N15	N15	-0.133563	-0.0777695
Zhang-ECH004	N15	ECH004-N15	N16	-0.0219758	-0.0777695
Zhang-ECH004	N17	ECH004-N17	N17	-0.0599218	-0.0764725
Zhang-ECH004	N17	ECH004-N17	N18	-0.0930233	-0.0764725
Zhang-ECH004	N19	ECH004-N19	N19	-0.149424	-0.130346
Zhang-ECH004	N19	ECH004-N19	N20	-0.111268	-0.130346
Zhang-ECH004	N21	ECH004-N21	N21	0	-0.0333862
Zhang-ECH004	N21	ECH004-N21	N22	-0.0333862	-0.0333862
Zhang-ECH004	O03	ECH004-O03	O03	0.153276	0.0876133
Zhang-ECH004	O03	ECH004-O03	O04	0.0219505	0.0876133
Zhang-ECH004	O05	ECH004-O05	O05	0.0325301	0.0461332
Zhang-ECH004	O05	ECH004-O05	O06	0.0597363	0.0461332
Zhang-ECH004	O07	ECH004-O07	O07	0.117079	0.0954945
Zhang-ECH004	O07	ECH004-O07	O08	0.0739104	0.0954945
Zhang-ECH004	O09	ECH004-O09	O09	0.221252	0.171932
Zhang-ECH004	O09	ECH004-O09	O10	0.122612	0.171932
Zhang-ECH004	O11	ECH004-O11	O11	0.098323	0.12071
Zhang-ECH004	O11	ECH004-O11	O12	0.143097	0.12071
Zhang-ECH004	O13	ECH004-O13	O13	0.669361	0.687564
Zhang-ECH004	O13	ECH004-O13	O14	0.705768	0.687564
Zhang-ECH004	O15	ECH004-O15	O15	0.161088	0.134301
Zhang-ECH004	O15	ECH004-O15	O16	0.107513	0.134301
Zhang-ECH004	O17	ECH004-O17	O17	-0.185581	-0.12789
Zhang-ECH004	O17	ECH004-O17	O18	-0.0701991	-0.12789
Zhang-ECH004	O19	ECH004-O19	O19	0.140553	0.133443
Zhang-ECH004	O19	ECH004-O19	O20	0.126334	0.133443
Zhang-ECH004	O21	ECH004-O21	O21	0	0.0680024
Zhang-ECH004	O21	ECH004-O21	O22	0.0680024	0.0680024
Zhang-ECH004	P03	ECH004-P03	P03	0.133532	0.12913
Zhang-ECH004	P03	ECH004-P03	P04	0.124727	0.12913
Zhang-ECH004	P05	ECH004-P05	P05	-0.0573548	-0.0380052
Zhang-ECH004	P05	ECH004-P05	P06	-0.0186557	-0.0380052
Zhang-ECH004	P07	ECH004-P07	P07	-0.0382357	-0.107374
Zhang-ECH004	P07	ECH004-P07	P08	-0.176513	-0.107374
Zhang-ECH004	P09	ECH004-P09	P09	-0.00331709	0.0100625
Zhang-ECH004	P09	ECH004-P09	P10	0.0234422	0.0100625
Zhang-ECH004	P11	ECH004-P11	P11	0.122994	0.10179
Zhang-ECH004	P11	ECH004-P11	P12	0.0805865	0.10179
Zhang-ECH004	P13	ECH004-P13	P13	0.215534	0.220964
Zhang-ECH004	P13	ECH004-P13	P14	0.226395	0.220964
Zhang-ECH004	P15	ECH004-P15	P15	-0.207032	-0.168638
Zhang-ECH004	P15	ECH004-P15	P16	-0.130244	-0.168638
Zhang-ECH004	P17	ECH004-P17	P17	-0.230435	-0.206965
Zhang-ECH004	P17	ECH004-P17	P18	-0.183495	-0.206965
Zhang-ECH004	P19	ECH004-P19	P19	0.136368	0.0935349
Zhang-ECH004	P19	ECH004-P19	P20	0.0507022	0.0935349
Zhang-ECH004	P21	ECH004-P21	P21	0	-0.147323
Zhang-ECH004	P21	ECH004-P21	P22	-0.147323	-0.147323

## Sheet: Screen_dose_45 compounds
Source Plate	Source Well	Compound name	Assay Well	Volume	Conc [uM]	665nm HTRF	620nm HTRF	665/620	Inhibition
Zhang-ECH001	A09	ECH001-A09	I14	2.5	0.625	59209	42021	1.40903	0.13819
Zhang-ECH001	A09	ECH001-A09	D07	2.5	0.625	63243	38756	1.63182	-0.0851099
Zhang-ECH001	A09	ECH001-A09	N22	2.5	0.625	64523	36823	1.75225	-0.205807
Zhang-ECH001	A09	ECH001-A09	G11	5	1.25	64458	43184	1.49264	0.0543966
Zhang-ECH001	A09	ECH001-A09	B04	5	1.25	60758	39344	1.54428	0.0026387
Zhang-ECH001	A09	ECH001-A09	L19	5	1.25	62669	38646	1.62162	-0.0748786
Zhang-ECH001	A09	ECH001-A09	E08	10	2.5	60704	46529	1.30465	0.242813
Zhang-ECH001	A09	ECH001-A09	O23	10	2.5	60519	38127	1.5873	-0.0404838
Zhang-ECH001	A09	ECH001-A09	J16	10	2.5	62165	38162	1.62898	-0.0822551
Zhang-ECH001	A09	ECH001-A09	C05	20	5	63251	40533	1.56048	-0.0136038
Zhang-ECH001	A09	ECH001-A09	M20	20	5	61145	48074	1.27189	0.275644
Zhang-ECH001	A09	ECH001-A09	H13	20	5	63129	38635	1.63398	-0.0872748
Zhang-ECH001	A09	ECH001-A09	A02	40	10	59011	47638	1.23874	0.308875
Zhang-ECH001	A09	ECH001-A09	K17	40	10	58823	44508	1.32163	0.225796
Zhang-ECH001	A09	ECH001-A09	F10	40	10	59597	43573	1.36775	0.179567
Zhang-ECH001	B09	ECH001-B09	I15	2.5	0.625	59455	40584	1.46499	0.0821097
Zhang-ECH001	B09	ECH001-B09	D08	2.5	0.625	62952	40331	1.56088	-0.0140068
Zhang-ECH001	B09	ECH001-B09	N23	2.5	0.625	62328	37740	1.65151	-0.10484
Zhang-ECH001	B09	ECH001-B09	G12	5	1.25	66342	45642	1.45353	0.0935925
Zhang-ECH001	B09	ECH001-B09	B05	5	1.25	61092	39523	1.54573	0.00117863
Zhang-ECH001	B09	ECH001-B09	L20	5	1.25	61716	37298	1.65467	-0.108011
Zhang-ECH001	B09	ECH001-B09	E09	10	2.5	61253	46260	1.3241	0.223315
Zhang-ECH001	B09	ECH001-B09	P02	10	2.5	57739	40992	1.40854	0.138682
Zhang-ECH001	B09	ECH001-B09	J17	10	2.5	62555	36982	1.6915	-0.14492
Zhang-ECH001	B09	ECH001-B09	C06	20	5	61935	43387	1.4275	0.11968
Zhang-ECH001	B09	ECH001-B09	M21	20	5	58896	43025	1.36888	0.178437
Zhang-ECH001	B09	ECH001-B09	H14	20	5	62672	38357	1.63391	-0.0872029
Zhang-ECH001	B09	ECH001-B09	A03	40	10	61287	46402	1.32078	0.226642
Zhang-ECH001	B09	ECH001-B09	K18	40	10	61663	45157	1.36552	0.181798
Zhang-ECH001	B09	ECH001-B09	F11	40	10	62041	41170	1.50695	0.0400533
Zhang-ECH001	B13	ECH001-B13	I16	2.5	0.625	59008	41144	1.43418	0.112984
Zhang-ECH001	B13	ECH001-B13	D09	2.5	0.625	62178	40556	1.53314	0.0138009
Zhang-ECH001	B13	ECH001-B13	O02	2.5	0.625	58750	37203	1.57917	-0.0323386
Zhang-ECH001	B13	ECH001-B13	G13	5	1.25	64804	43746	1.48137	0.0656888
Zhang-ECH001	B13	ECH001-B13	B06	5	1.25	62128	38165	1.62788	-0.0811551
Zhang-ECH001	B13	ECH001-B13	L21	5	1.25	61455	37771	1.62704	-0.0803161
Zhang-ECH001	B13	ECH001-B13	E10	10	2.5	60452	46413	1.30248	0.244987
Zhang-ECH001	B13	ECH001-B13	P03	10	2.5	55309	42478	1.30206	0.245406
Zhang-ECH001	B13	ECH001-B13	J18	10	2.5	61213	37606	1.62775	-0.0810214
Zhang-ECH001	B13	ECH001-B13	C07	20	5	62352	43273	1.4409	0.106252
Zhang-ECH001	B13	ECH001-B13	M22	20	5	59532	40431	1.47243	0.0746444
Zhang-ECH001	B13	ECH001-B13	H15	20	5	63985	38122	1.67843	-0.131819
Zhang-ECH001	B13	ECH001-B13	A04	40	10	60231	47745	1.26151	0.286046
Zhang-ECH001	B13	ECH001-B13	K19	40	10	60974	42776	1.42543	0.121761
Zhang-ECH001	B13	ECH001-B13	F12	40	10	61392	39414	1.55762	-0.0107348
Zhang-ECH001	G17	ECH001-G17	I17	2.5	0.625	62379	40814	1.52837	0.0185785
Zhang-ECH001	G17	ECH001-G17	D10	2.5	0.625	62263	40336	1.54361	0.00330766
Zhang-ECH001	G17	ECH001-G17	O03	2.5	0.625	58356	37499	1.5562	-0.00931391
Zhang-ECH001	G17	ECH001-G17	G14	5	1.25	63624	41629	1.52836	0.0185936
Zhang-ECH001	G17	ECH001-G17	B07	5	1.25	63237	38998	1.62154	-0.0748064
Zhang-ECH001	G17	ECH001-G17	L22	5	1.25	62108	36860	1.68497	-0.138377
Zhang-ECH001	G17	ECH001-G17	E11	10	2.5	58790	45919	1.2803	0.26722
Zhang-ECH001	G17	ECH001-G17	P04	10	2.5	59006	43664	1.35136	0.195991
Zhang-ECH001	G17	ECH001-G17	J19	10	2.5	59024	36112	1.63447	-0.0877617
Zhang-ECH001	G17	ECH001-G17	C08	20	5	57300	46381	1.23542	0.312201
Zhang-ECH001	G17	ECH001-G17	M23	20	5	52156	41202	1.26586	0.28169
Zhang-ECH001	G17	ECH001-G17	H16	20	5	58556	41297	1.41792	0.12928
Zhang-ECH001	G17	ECH001-G17	A05	40	10	30929	42719	0.72401	0.824778
Zhang-ECH001	G17	ECH001-G17	K20	40	10	34369	47124	0.729331	0.819445
Zhang-ECH001	G17	ECH001-G17	F13	40	10	37381	42011	0.889791	0.658619
Zhang-ECH001	G19	ECH001-G19	I18	2.5	0.625	59375	41599	1.42732	0.119864
Zhang-ECH001	G19	ECH001-G19	D11	2.5	0.625	61552	39746	1.54863	-0.00172895
Zhang-ECH001	G19	ECH001-G19	O04	2.5	0.625	58300	37206	1.56695	-0.0200885
Zhang-ECH001	G19	ECH001-G19	G15	5	1.25	62512	42479	1.4716	0.0754831
Zhang-ECH001	G19	ECH001-G19	B08	5	1.25	63333	38934	1.62668	-0.0799493
Zhang-ECH001	G19	ECH001-G19	L23	5	1.25	60808	36917	1.64715	-0.100475
Zhang-ECH001	G19	ECH001-G19	E12	10	2.5	60793	45639	1.33204	0.215359
Zhang-ECH001	G19	ECH001-G19	P05	10	2.5	57788	40291	1.43427	0.1129
Zhang-ECH001	G19	ECH001-G19	J20	10	2.5	59259	38762	1.52879	0.0181591
Zhang-ECH001	G19	ECH001-G19	C09	20	5	62384	44175	1.4122	0.135015
Zhang-ECH001	G19	ECH001-G19	N02	20	5	55766	39793	1.4014	0.145839
Zhang-ECH001	G19	ECH001-G19	H17	20	5	62572	39610	1.5797	-0.0328682
Zhang-ECH001	G19	ECH001-G19	A06	40	10	67508	43792	1.54156	0.00536093
Zhang-ECH001	G19	ECH001-G19	K21	40	10	57467	41460	1.38608	0.161193
Zhang-ECH001	G19	ECH001-G19	F14	40	10	61871	42013	1.47266	0.0744152
Zhang-ECH002	F07	ECH002-F07	I19	2.5	0.625	60572	40290	1.5034	0.0436078
Zhang-ECH002	F07	ECH002-F07	D12	2.5	0.625	61756	39063	1.58093	-0.0341023
Zhang-ECH002	F07	ECH002-F07	O05	2.5	0.625	57641	37617	1.53231	0.0146296
Zhang-ECH002	F07	ECH002-F07	G16	5	1.25	63977	44399	1.44096	0.106195
Zhang-ECH002	F07	ECH002-F07	B09	5	1.25	61521	41594	1.47908	0.0679802
Zhang-ECH002	F07	ECH002-F07	M02	5	1.25	58953	39339	1.49859	0.04843
Zhang-ECH002	F07	ECH002-F07	E13	10	2.5	61656	43483	1.41793	0.12927
Zhang-ECH002	F07	ECH002-F07	P06	10	2.5	61018	42627	1.43144	0.115732
Zhang-ECH002	F07	ECH002-F07	J21	10	2.5	61246	36182	1.69272	-0.146144
Zhang-ECH002	F07	ECH002-F07	C10	20	5	66144	46037	1.43676	0.110403
Zhang-ECH002	F07	ECH002-F07	N03	20	5	56585	40576	1.39454	0.152713
Zhang-ECH002	F07	ECH002-F07	H18	20	5	61999	38624	1.60519	-0.058418
Zhang-ECH002	F07	ECH002-F07	A07	40	10	45950	46650	0.984995	0.563198
Zhang-ECH002	F07	ECH002-F07	K22	40	10	40354	43981	0.917533	0.630814
Zhang-ECH002	F07	ECH002-F07	F15	40	10	48052	39886	1.20473	0.342957
Zhang-ECH002	F09	ECH002-F09	I20	2.5	0.625	58130	39756	1.46217	0.0849331
Zhang-ECH002	F09	ECH002-F09	D13	2.5	0.625	63274	38177	1.65739	-0.110729
Zhang-ECH002	F09	ECH002-F09	O06	2.5	0.625	57753	36915	1.56449	-0.0176173
Zhang-ECH002	F09	ECH002-F09	G17	5	1.25	61014	42571	1.43323	0.113939
Zhang-ECH002	F09	ECH002-F09	B10	5	1.25	61274	40151	1.52609	0.0208674
Zhang-ECH002	F09	ECH002-F09	M03	5	1.25	58740	37158	1.58082	-0.0339857
Zhang-ECH002	F09	ECH002-F09	E14	10	2.5	62100	41630	1.49171	0.0553222
Zhang-ECH002	F09	ECH002-F09	P07	10	2.5	61178	39619	1.54416	0.00275699
Zhang-ECH002	F09	ECH002-F09	J22	10	2.5	60092	37126	1.6186	-0.0718511
Zhang-ECH002	F09	ECH002-F09	C11	20	5	62917	45388	1.3862	0.161072
Zhang-ECH002	F09	ECH002-F09	N04	20	5	60515	43562	1.38917	0.1581
Zhang-ECH002	F09	ECH002-F09	H19	20	5	62324	38370	1.62429	-0.0775578
Zhang-ECH002	F09	ECH002-F09	A08	40	10	58807	47902	1.22765	0.319986
Zhang-ECH002	F09	ECH002-F09	K23	40	10	58198	40498	1.43706	0.110101
Zhang-ECH002	F09	ECH002-F09	F16	40	10	60443	39294	1.53822	0.00870398
Zhang-ECH002	G07	ECH002-G07	I21	2.5	0.625	59750	38559	1.54957	-0.00267066
Zhang-ECH002	G07	ECH002-G07	D14	2.5	0.625	61169	38361	1.59456	-0.0477622
Zhang-ECH002	G07	ECH002-G07	O07	2.5	0.625	59471	37891	1.56953	-0.0226712
Zhang-ECH002	G07	ECH002-G07	G18	5	1.25	60674	42768	1.41868	0.128524
Zhang-ECH002	G07	ECH002-G07	B11	5	1.25	61513	40899	1.50402	0.0429847
Zhang-ECH002	G07	ECH002-G07	M04	5	1.25	58734	40204	1.4609	0.0862059
Zhang-ECH002	G07	ECH002-G07	E15	10	2.5	59211	43337	1.36629	0.181029
Zhang-ECH002	G07	ECH002-G07	P08	10	2.5	60564	43289	1.39906	0.148184
Zhang-ECH002	G07	ECH002-G07	J23	10	2.5	58973	39390	1.49716	0.0498658
Zhang-ECH002	G07	ECH002-G07	C12	20	5	63231	45193	1.39913	0.148114
Zhang-ECH002	G07	ECH002-G07	N05	20	5	56003	41126	1.36174	0.18559
Zhang-ECH002	G07	ECH002-G07	H20	20	5	59918	39277	1.52552	0.0214338
Zhang-ECH002	G07	ECH002-G07	A09	40	10	58432	47622	1.227	0.320644
Zhang-ECH002	G07	ECH002-G07	L02	40	10	48177	44017	1.09451	0.453433
Zhang-ECH002	G07	ECH002-G07	F17	40	10	53780	40492	1.32816	0.219245
Zhang-ECH002	L19	ECH002-L19	I22	2.5	0.625	58790	39903	1.47332	0.0737541
Zhang-ECH002	L19	ECH002-L19	D15	2.5	0.625	60461	39310	1.53806	0.00887256
Zhang-ECH002	L19	ECH002-L19	O08	2.5	0.625	60428	39930	1.51335	0.0336371
Zhang-ECH002	L19	ECH002-L19	G19	5	1.25	60645	42411	1.42994	0.11724
Zhang-ECH002	L19	ECH002-L19	B12	5	1.25	61280	41577	1.47389	0.0731838
Zhang-ECH002	L19	ECH002-L19	M05	5	1.25	57913	39001	1.48491	0.0621398
Zhang-ECH002	L19	ECH002-L19	E16	10	2.5	59393	42262	1.40535	0.14188
Zhang-ECH002	L19	ECH002-L19	P09	10	2.5	58842	43274	1.35975	0.187582
Zhang-ECH002	L19	ECH002-L19	K02	10	2.5	66505	40221	1.65349	-0.106824
Zhang-ECH002	L19	ECH002-L19	C13	20	5	64438	44888	1.43553	0.111635
Zhang-ECH002	L19	ECH002-L19	N06	20	5	58154	43350	1.3415	0.205879
Zhang-ECH002	L19	ECH002-L19	H21	20	5	62499	38330	1.63055	-0.0838327
Zhang-ECH002	L19	ECH002-L19	A10	40	10	58814	47202	1.24601	0.30159
Zhang-ECH002	L19	ECH002-L19	L03	40	10	55929	42285	1.32267	0.224753
Zhang-ECH002	L19	ECH002-L19	F18	40	10	58429	38057	1.5353	0.011633
Zhang-ECH002	O07	ECH002-O07	I23	2.5	0.625	59791	40145	1.48938	0.0576642
Zhang-ECH002	O07	ECH002-O07	D16	2.5	0.625	60913	42987	1.41701	0.130196
Zhang-ECH002	O07	ECH002-O07	O09	2.5	0.625	60576	38217	1.58505	-0.0382321
Zhang-ECH002	O07	ECH002-O07	G20	5	1.25	63756	41736	1.5276	0.0193508
Zhang-ECH002	O07	ECH002-O07	B13	5	1.25	61449	40647	1.51177	0.035217
Zhang-ECH002	O07	ECH002-O07	M06	5	1.25	60818	39271	1.54867	-0.00176982
Zhang-ECH002	O07	ECH002-O07	E17	10	2.5	60652	42141	1.43926	0.107891
Zhang-ECH002	O07	ECH002-O07	P10	10	2.5	61484	42687	1.44034	0.106807
Zhang-ECH002	O07	ECH002-O07	K03	10	2.5	65623	38071	1.7237	-0.177195
Zhang-ECH002	O07	ECH002-O07	C14	20	5	61066	45500	1.34211	0.205267
Zhang-ECH002	O07	ECH002-O07	N07	20	5	53687	43987	1.22052	0.327135
Zhang-ECH002	O07	ECH002-O07	H22	20	5	60828	39052	1.55762	-0.0107311
Zhang-ECH002	O07	ECH002-O07	A11	40	10	36846	48636	0.757587	0.791125
Zhang-ECH002	O07	ECH002-O07	L04	40	10	35566	45030	0.789829	0.758809
Zhang-ECH002	O07	ECH002-O07	F19	40	10	34254	41809	0.819297	0.729274
Zhang-ECH003	A13	ECH003-A13	J02	2.5	0.625	60160	43345	1.38793	0.159338
Zhang-ECH003	A13	ECH003-A13	D17	2.5	0.625	61444	40732	1.50849	0.038502
Zhang-ECH003	A13	ECH003-A13	O10	2.5	0.625	62833	37686	1.66728	-0.120643
Zhang-ECH003	A13	ECH003-A13	G21	5	1.25	63929	39523	1.61751	-0.0707663
Zhang-ECH003	A13	ECH003-A13	B14	5	1.25	60715	40723	1.49093	0.0561102
Zhang-ECH003	A13	ECH003-A13	M07	5	1.25	62199	38755	1.60493	-0.0581521
Zhang-ECH003	A13	ECH003-A13	E18	10	2.5	59654	42140	1.41561	0.131594
Zhang-ECH003	A13	ECH003-A13	P11	10	2.5	59726	42870	1.39319	0.154071
Zhang-ECH003	A13	ECH003-A13	K04	10	2.5	64016	38031	1.68326	-0.136661
Zhang-ECH003	A13	ECH003-A13	C15	20	5	65964	45235	1.45825	0.08886
Zhang-ECH003	A13	ECH003-A13	N08	20	5	53167	42573	1.24884	0.298746
Zhang-ECH003	A13	ECH003-A13	H23	20	5	57391	39259	1.46186	0.0852472
Zhang-ECH003	A13	ECH003-A13	A12	40	10	37322	48649	0.767169	0.781521
Zhang-ECH003	A13	ECH003-A13	L05	40	10	35188	43341	0.811887	0.736701
Zhang-ECH003	A13	ECH003-A13	F20	40	10	28629	41305	0.693112	0.855747
Zhang-ECH003	B11	ECH003-B11	J03	2.5	0.625	58591	43714	1.34033	0.207055
Zhang-ECH003	B11	ECH003-B11	D18	2.5	0.625	60701	39013	1.55592	-0.00902902
Zhang-ECH003	B11	ECH003-B11	O11	2.5	0.625	62603	38279	1.63544	-0.0887332
Zhang-ECH003	B11	ECH003-B11	G22	5	1.25	61275	41592	1.47324	0.073837
Zhang-ECH003	B11	ECH003-B11	B15	5	1.25	61424	40638	1.51149	0.035498
Zhang-ECH003	B11	ECH003-B11	M08	5	1.25	64146	37496	1.71074	-0.164208
Zhang-ECH003	B11	ECH003-B11	E19	10	2.5	62759	41972	1.49526	0.051768
Zhang-ECH003	B11	ECH003-B11	P12	10	2.5	60695	45467	1.33492	0.212469
Zhang-ECH003	B11	ECH003-B11	K05	10	2.5	59349	37631	1.57713	-0.0302908
Zhang-ECH003	B11	ECH003-B11	C16	20	5	82270	45540	1.80654	-0.260228
Zhang-ECH003	B11	ECH003-B11	N09	20	5	53711	42092	1.27604	0.271489
Zhang-ECH003	B11	ECH003-B11	I02	20	5	56879	42251	1.34622	0.201151
Zhang-ECH003	B11	ECH003-B11	A13	40	10	38531	49281	0.781863	0.766793
Zhang-ECH003	B11	ECH003-B11	L06	40	10	33960	46528	0.729883	0.818892
Zhang-ECH003	B11	ECH003-B11	F21	40	10	33204	39605	0.838379	0.710148
Zhang-ECH003	B21	ECH003-B21	J04	2.5	0.625	62034	42730	1.45177	0.0953592
Zhang-ECH003	B21	ECH003-B21	D19	2.5	0.625	60607	39009	1.55367	-0.00677373
Zhang-ECH003	B21	ECH003-B21	O12	2.5	0.625	62504	38129	1.63928	-0.0925794
Zhang-ECH003	B21	ECH003-B21	G23	5	1.25	61612	40654	1.51552	0.0314593
Zhang-ECH003	B21	ECH003-B21	B16	5	1.25	60607	40393	1.50043	0.0465817
Zhang-ECH003	B21	ECH003-B21	M09	5	1.25	64742	38113	1.69869	-0.152123
Zhang-ECH003	B21	ECH003-B21	E20	10	2.5	63213	41673	1.51688	0.030096
Zhang-ECH003	B21	ECH003-B21	P13	10	2.5	62421	42927	1.45412	0.093001
Zhang-ECH003	B21	ECH003-B21	K06	10	2.5	57374	37817	1.51715	0.0298284
Zhang-ECH003	B21	ECH003-B21	C17	20	5	90615	43378	2.08896	-0.543291
Zhang-ECH003	B21	ECH003-B21	N10	20	5	50962	42378	1.20256	0.345137
Zhang-ECH003	B21	ECH003-B21	I03	20	5	60033	39692	1.51247	0.0345164
Zhang-ECH003	B21	ECH003-B21	A14	40	10	47715	46011	1.03703	0.511039
Zhang-ECH003	B21	ECH003-B21	L07	40	10	41536	44479	0.933834	0.614475
Zhang-ECH003	B21	ECH003-B21	F22	40	10	44401	39685	1.11884	0.429051
Zhang-ECH003	C17	ECH003-C17	J05	2.5	0.625	59896	39434	1.51889	0.0280805
Zhang-ECH003	C17	ECH003-C17	D20	2.5	0.625	60909	38487	1.58259	-0.035759
Zhang-ECH003	C17	ECH003-C17	O13	2.5	0.625	63408	37671	1.6832	-0.136607
Zhang-ECH003	C17	ECH003-C17	H02	5	1.25	61326	44593	1.37524	0.172063
Zhang-ECH003	C17	ECH003-C17	B17	5	1.25	60678	42941	1.41306	0.134159
Zhang-ECH003	C17	ECH003-C17	M10	5	1.25	64910	39233	1.65447	-0.107811
Zhang-ECH003	C17	ECH003-C17	E21	10	2.5	61888	40445	1.53018	0.0167702
Zhang-ECH003	C17	ECH003-C17	P14	10	2.5	61850	42766	1.44624	0.100896
Zhang-ECH003	C17	ECH003-C17	K07	10	2.5	59325	39893	1.4871	0.0599424
Zhang-ECH003	C17	ECH003-C17	C18	20	5	92515	43199	2.1416	-0.59605
Zhang-ECH003	C17	ECH003-C17	N11	20	5	59150	40704	1.45317	0.0939488
Zhang-ECH003	C17	ECH003-C17	I04	20	5	63411	40975	1.54755	-0.000646046
Zhang-ECH003	C17	ECH003-C17	A15	40	10	48088	46769	1.0282	0.519891
Zhang-ECH003	C17	ECH003-C17	L08	40	10	42957	44663	0.961803	0.586442
Zhang-ECH003	C17	ECH003-C17	F23	40	10	47223	40082	1.17816	0.369591
Zhang-ECH003	C21	ECH003-C21	J06	2.5	0.625	61803	41678	1.48287	0.0641864
Zhang-ECH003	C21	ECH003-C21	D21	2.5	0.625	62376	38847	1.60568	-0.0589093
Zhang-ECH003	C21	ECH003-C21	O14	2.5	0.625	61006	36757	1.65971	-0.11306
Zhang-ECH003	C21	ECH003-C21	H03	5	1.25	62415	43628	1.43062	0.116556
Zhang-ECH003	C21	ECH003-C21	B18	5	1.25	61821	38849	1.59132	-0.0445077
Zhang-ECH003	C21	ECH003-C21	M11	5	1.25	63873	37395	1.70806	-0.161522
Zhang-ECH003	C21	ECH003-C21	E22	10	2.5	60861	39825	1.52821	0.0187406
Zhang-ECH003	C21	ECH003-C21	P15	10	2.5	61633	42665	1.44458	0.102563
Zhang-ECH003	C21	ECH003-C21	K08	10	2.5	59595	37808	1.57625	-0.0294119
Zhang-ECH003	C21	ECH003-C21	C19	20	5	82347	42990	1.91549	-0.369425
Zhang-ECH003	C21	ECH003-C21	N12	20	5	55962	43504	1.28636	0.261139
Zhang-ECH003	C21	ECH003-C21	I05	20	5	57227	39891	1.43458	0.112581
Zhang-ECH003	C21	ECH003-C21	A16	40	10	39729	46586	0.85281	0.695684
Zhang-ECH003	C21	ECH003-C21	L09	40	10	34084	44068	0.773441	0.775235
Zhang-ECH003	C21	ECH003-C21	G02	40	10	40424	40854	0.989475	0.558707
Zhang-ECH003	E15	ECH003-E15	J07	2.5	0.625	61769	40379	1.52973	0.0172172
Zhang-ECH003	E15	ECH003-E15	D22	2.5	0.625	61223	39000	1.56982	-0.022964
Zhang-ECH003	E15	ECH003-E15	O15	2.5	0.625	62000	37655	1.64653	-0.0998464
Zhang-ECH003	E15	ECH003-E15	H04	5	1.25	62097	44613	1.3919	0.155359
Zhang-ECH003	E15	ECH003-E15	B19	5	1.25	59975	39054	1.53569	0.0112403
Zhang-ECH003	E15	ECH003-E15	M12	5	1.25	63544	38508	1.65015	-0.103478
Zhang-ECH003	E15	ECH003-E15	E23	10	2.5	60401	41174	1.46697	0.080122
Zhang-ECH003	E15	ECH003-E15	P16	10	2.5	60857	41730	1.45835	0.0887598
Zhang-ECH003	E15	ECH003-E15	K09	10	2.5	59625	37497	1.59013	-0.0433171
Zhang-ECH003	E15	ECH003-E15	C20	20	5	84539	42272	1.99988	-0.454008
Zhang-ECH003	E15	ECH003-E15	N13	20	5	57228	41548	1.37739	0.169901
Zhang-ECH003	E15	ECH003-E15	I06	20	5	59216	40429	1.46469	0.0824054
Zhang-ECH003	E15	ECH003-E15	A17	40	10	43743	44114	0.99159	0.556587
Zhang-ECH003	E15	ECH003-E15	L10	40	10	40898	44220	0.924876	0.623454
Zhang-ECH003	E15	ECH003-E15	G03	40	10	47288	40783	1.1595	0.388291
Zhang-ECH003	H17	ECH003-H17	J08	2.5	0.625	61082	41410	1.47505	0.0720186
Zhang-ECH003	H17	ECH003-H17	D23	2.5	0.625	58972	33574	1.75648	-0.210048
Zhang-ECH003	H17	ECH003-H17	O16	2.5	0.625	61360	37097	1.65404	-0.107378
Zhang-ECH003	H17	ECH003-H17	H05	5	1.25	61508	41826	1.47057	0.0765146
Zhang-ECH003	H17	ECH003-H17	B20	5	1.25	61445	41283	1.48839	0.0586574
Zhang-ECH003	H17	ECH003-H17	M13	5	1.25	62685	36504	1.71721	-0.170689
Zhang-ECH003	H17	ECH003-H17	F02	10	2.5	61110	46232	1.32181	0.225611
Zhang-ECH003	H17	ECH003-H17	P17	10	2.5	60065	43155	1.39184	0.15542
Zhang-ECH003	H17	ECH003-H17	K10	10	2.5	61377	37063	1.65602	-0.109359
Zhang-ECH003	H17	ECH003-H17	C21	20	5	84903	40989	2.07136	-0.52565
Zhang-ECH003	H17	ECH003-H17	N14	20	5	60186	41711	1.44293	0.104218
Zhang-ECH003	H17	ECH003-H17	I07	20	5	60297	40133	1.50243	0.044581
Zhang-ECH003	H17	ECH003-H17	A18	40	10	46465	44848	1.03606	0.512021
Zhang-ECH003	H17	ECH003-H17	L11	40	10	38954	42979	0.90635	0.642022
Zhang-ECH003	H17	ECH003-H17	G04	40	10	47171	41229	1.14412	0.403707
Zhang-ECH003	I19	ECH003-I19	J09	2.5	0.625	62055	41807	1.48432	0.062731
Zhang-ECH003	I19	ECH003-I19	E02	2.5	0.625	61138	41251	1.4821	0.0649595
Zhang-ECH003	I19	ECH003-I19	O17	2.5	0.625	60579	35089	1.72644	-0.17994
Zhang-ECH003	I19	ECH003-I19	H06	5	1.25	63382	45686	1.38734	0.159934
Zhang-ECH003	I19	ECH003-I19	B21	5	1.25	61969	38227	1.62108	-0.07434
Zhang-ECH003	I19	ECH003-I19	M14	5	1.25	57524	37313	1.54166	0.00525972
Zhang-ECH003	I19	ECH003-I19	F03	10	2.5	60765	44263	1.37282	0.174489
Zhang-ECH003	I19	ECH003-I19	P18	10	2.5	62546	43887	1.42516	0.122027
Zhang-ECH003	I19	ECH003-I19	K11	10	2.5	60541	37355	1.62069	-0.0739531
Zhang-ECH003	I19	ECH003-I19	C22	20	5	79257	43003	1.84306	-0.296825
Zhang-ECH003	I19	ECH003-I19	N15	20	5	55888	41796	1.33716	0.210226
Zhang-ECH003	I19	ECH003-I19	I08	20	5	59185	41128	1.43904	0.108111
Zhang-ECH003	I19	ECH003-I19	A19	40	10	37975	45424	0.836012	0.712521
Zhang-ECH003	I19	ECH003-I19	L12	40	10	36038	44864	0.803272	0.745335
Zhang-ECH003	I19	ECH003-I19	G05	40	10	32207	35288	0.91269	0.635668
Zhang-ECH003	L03	ECH003-L03	J10	2.5	0.625	60457	41516	1.45623	0.0908822
Zhang-ECH003	L03	ECH003-L03	E03	2.5	0.625	60847	37721	1.61308	-0.0663226
Zhang-ECH003	L03	ECH003-L03	O18	2.5	0.625	59332	35253	1.68303	-0.136436
Zhang-ECH003	L03	ECH003-L03	H07	5	1.25	63181	44158	1.43079	0.11638
Zhang-ECH003	L03	ECH003-L03	B22	5	1.25	64227	37424	1.7162	-0.169676
Zhang-ECH003	L03	ECH003-L03	M15	5	1.25	57860	36984	1.56446	-0.0175916
Zhang-ECH003	L03	ECH003-L03	F04	10	2.5	63161	48994	1.28916	0.25834
Zhang-ECH003	L03	ECH003-L03	P19	10	2.5	60649	42990	1.41077	0.13645
Zhang-ECH003	L03	ECH003-L03	K12	10	2.5	63364	38082	1.66388	-0.117242
Zhang-ECH003	L03	ECH003-L03	C23	20	5	90488	42363	2.13601	-0.590452
Zhang-ECH003	L03	ECH003-L03	N16	20	5	61247	41134	1.48896	0.0580783
Zhang-ECH003	L03	ECH003-L03	I09	20	5	64686	39142	1.6526	-0.105931
Zhang-ECH003	L03	ECH003-L03	A20	40	10	58912	41357	1.42447	0.122714
Zhang-ECH003	L03	ECH003-L03	L13	40	10	61676	43333	1.4233	0.123888
Zhang-ECH003	L03	ECH003-L03	G06	40	10	61828	38076	1.62381	-0.0770719
Zhang-ECH003	L05	ECH003-L05	J11	2.5	0.625	59316	41012	1.44631	0.10083
Zhang-ECH003	L05	ECH003-L05	E04	2.5	0.625	61703	40207	1.53463	0.0123036
Zhang-ECH003	L05	ECH003-L05	O19	2.5	0.625	59755	36011	1.65935	-0.112702
Zhang-ECH003	L05	ECH003-L05	H08	5	1.25	65897	42864	1.53735	0.00957995
Zhang-ECH003	L05	ECH003-L05	B23	5	1.25	61680	34885	1.7681	-0.221692
Zhang-ECH003	L05	ECH003-L05	M16	5	1.25	57957	37412	1.54916	-0.00225167
Zhang-ECH003	L05	ECH003-L05	F05	10	2.5	61290	41808	1.46599	0.0811063
Zhang-ECH003	L05	ECH003-L05	P20	10	2.5	61397	42866	1.4323	0.11487
Zhang-ECH003	L05	ECH003-L05	K13	10	2.5	62119	36728	1.69133	-0.144746
Zhang-ECH003	L05	ECH003-L05	D02	20	5	60970	46535	1.3102	0.237253
Zhang-ECH003	L05	ECH003-L05	N17	20	5	61301	42194	1.45284	0.0942868
Zhang-ECH003	L05	ECH003-L05	I10	20	5	64808	39504	1.64054	-0.0938478
Zhang-ECH003	L05	ECH003-L05	A21	40	10	64821	41329	1.56841	-0.0215547
Zhang-ECH003	L05	ECH003-L05	L14	40	10	57334	42998	1.33341	0.213986
Zhang-ECH003	L05	ECH003-L05	G07	40	10	60798	38452	1.58114	-0.0343095
Zhang-ECH003	M11	ECH003-M11	J12	2.5	0.625	63940	40861	1.56482	-0.0179494
Zhang-ECH003	M11	ECH003-M11	E05	2.5	0.625	61741	38102	1.62041	-0.0736727
Zhang-ECH003	M11	ECH003-M11	O20	2.5	0.625	60619	36398	1.66545	-0.118811
Zhang-ECH003	M11	ECH003-M11	H09	5	1.25	60419	43538	1.38773	0.159542
Zhang-ECH003	M11	ECH003-M11	C02	5	1.25	61440	40491	1.51737	0.029602
Zhang-ECH003	M11	ECH003-M11	M17	5	1.25	59845	36125	1.65661	-0.109951
Zhang-ECH003	M11	ECH003-M11	F06	10	2.5	61001	43994	1.38658	0.1607
Zhang-ECH003	M11	ECH003-M11	P21	10	2.5	61621	40036	1.53914	0.00778678
Zhang-ECH003	M11	ECH003-M11	K14	10	2.5	63106	36143	1.74601	-0.199555
Zhang-ECH003	M11	ECH003-M11	D03	20	5	60864	44571	1.36555	0.181771
Zhang-ECH003	M11	ECH003-M11	N18	20	5	60330	42797	1.40968	0.137544
Zhang-ECH003	M11	ECH003-M11	I11	20	5	63020	39091	1.61214	-0.065376
Zhang-ECH003	M11	ECH003-M11	A22	40	10	47848	44006	1.08731	0.460652
Zhang-ECH003	M11	ECH003-M11	L15	40	10	45397	43860	1.03504	0.513035
Zhang-ECH003	M11	ECH003-M11	G08	40	10	49145	41138	1.19464	0.353076
Zhang-ECH003	M13	ECH003-M13	J13	2.5	0.625	60062	40449	1.48488	0.0621683
Zhang-ECH003	M13	ECH003-M13	E06	2.5	0.625	61650	38130	1.61684	-0.0700881
Zhang-ECH003	M13	ECH003-M13	O21	2.5	0.625	60024	37825	1.58689	-0.0400695
Zhang-ECH003	M13	ECH003-M13	H10	5	1.25	61606	43520	1.41558	0.13163
Zhang-ECH003	M13	ECH003-M13	C03	5	1.25	61558	42003	1.46556	0.0815326
Zhang-ECH003	M13	ECH003-M13	M18	5	1.25	52990	30089	1.76111	-0.214689
Zhang-ECH003	M13	ECH003-M13	F07	10	2.5	61985	43859	1.41328	0.133935
Zhang-ECH003	M13	ECH003-M13	P22	10	2.5	60817	41700	1.45844	0.0886696
Zhang-ECH003	M13	ECH003-M13	K15	10	2.5	62067	37063	1.67464	-0.128018
Zhang-ECH003	M13	ECH003-M13	D04	20	5	61003	45057	1.35391	0.193442
Zhang-ECH003	M13	ECH003-M13	N19	20	5	60016	40487	1.48235	0.0647039
Zhang-ECH003	M13	ECH003-M13	I12	20	5	64512	38419	1.67917	-0.132562
Zhang-ECH003	M13	ECH003-M13	A23	40	10	58971	42943	1.37324	0.174067
Zhang-ECH003	M13	ECH003-M13	L16	40	10	58410	42870	1.36249	0.184839
Zhang-ECH003	M13	ECH003-M13	G09	40	10	60997	39313	1.55157	-0.00467511
Zhang-ECH003	M15	ECH003-M15	J14	2.5	0.625	59762	40385	1.47981	0.0672552
Zhang-ECH003	M15	ECH003-M15	E07	2.5	0.625	61536	37832	1.62656	-0.0798327
Zhang-ECH003	M15	ECH003-M15	O22	2.5	0.625	60094	36458	1.64831	-0.10163
Zhang-ECH003	M15	ECH003-M15	H11	5	1.25	60924	42465	1.43469	0.112478
Zhang-ECH003	M15	ECH003-M15	C04	5	1.25	62758	40953	1.53244	0.0145022
Zhang-ECH003	M15	ECH003-M15	M19	5	1.25	59675	37306	1.59961	-0.0528202
Zhang-ECH003	M15	ECH003-M15	F08	10	2.5	61508	44605	1.37895	0.168344
Zhang-ECH003	M15	ECH003-M15	P23	10	2.5	60640	40687	1.4904	0.0566355
Zhang-ECH003	M15	ECH003-M15	K16	10	2.5	63865	37559	1.70039	-0.153833
Zhang-ECH003	M15	ECH003-M15	D05	20	5	60391	40461	1.49257	0.0544598
Zhang-ECH003	M15	ECH003-M15	N20	20	5	60279	40368	1.49324	0.0537942
Zhang-ECH003	M15	ECH003-M15	I13	20	5	64034	38562	1.66055	-0.113897
Zhang-ECH003	M15	ECH003-M15	B02	40	10	59085	47064	1.25542	0.292156
Zhang-ECH003	M15	ECH003-M15	L17	40	10	55665	43437	1.28151	0.266004
Zhang-ECH003	M15	ECH003-M15	G10	40	10	59327	39866	1.48816	0.0588827
Zhang-ECH003	N03	ECH003-N03	J15	2.5	0.625	59546	40078	1.48575	0.0612957
Zhang-ECH003	N03	ECH003-N03	E08	2.5	0.625	61895	38953	1.58897	-0.0421534
Zhang-ECH003	N03	ECH003-N03	O23	2.5	0.625	59948	36340	1.64964	-0.102968
Zhang-ECH003	N03	ECH003-N03	H12	5	1.25	60630	42269	1.43438	0.112781
Zhang-ECH003	N03	ECH003-N03	C05	5	1.25	61991	38572	1.60715	-0.0603791
Zhang-ECH003	N03	ECH003-N03	M20	5	1.25	60789	37810	1.60775	-0.0609794
Zhang-ECH003	N03	ECH003-N03	F09	10	2.5	60669	44739	1.35607	0.19128
Zhang-ECH003	N03	ECH003-N03	A02	10	2.5	63344	43994	1.43983	0.107321
Zhang-ECH003	N03	ECH003-N03	K17	10	2.5	63035	37230	1.69312	-0.146549
Zhang-ECH003	N03	ECH003-N03	D06	20	5	61897	43715	1.41592	0.131287
Zhang-ECH003	N03	ECH003-N03	N21	20	5	57178	41537	1.37656	0.170742
Zhang-ECH003	N03	ECH003-N03	I14	20	5	59362	39213	1.51383	0.0331497
Zhang-ECH003	N03	ECH003-N03	B03	40	10	64468	47287	1.36333	0.183994
Zhang-ECH003	N03	ECH003-N03	L18	40	10	58715	41412	1.41783	0.129378
Zhang-ECH003	N03	ECH003-N03	G11	40	10	59768	39782	1.50239	0.0446225
Zhang-ECH003	N05	ECH003-N05	J16	2.5	0.625	58959	39491	1.49297	0.0540589
Zhang-ECH003	N05	ECH003-N05	E09	2.5	0.625	61826	39511	1.56478	-0.0179114
Zhang-ECH003	N05	ECH003-N05	P02	2.5	0.625	60072	38691	1.55261	-0.00571334
Zhang-ECH003	N05	ECH003-N05	H13	5	1.25	59995	42301	1.41829	0.128915
Zhang-ECH003	N05	ECH003-N05	C06	5	1.25	61695	39931	1.54504	0.00187289
Zhang-ECH003	N05	ECH003-N05	M21	5	1.25	62208	36826	1.68924	-0.142658
Zhang-ECH003	N05	ECH003-N05	F10	10	2.5	62617	44791	1.39798	0.149267
Zhang-ECH003	N05	ECH003-N05	A03	10	2.5	62179	40778	1.52482	0.022142
Zhang-ECH003	N05	ECH003-N05	K18	10	2.5	57980	35124	1.65072	-0.104051
Zhang-ECH003	N05	ECH003-N05	D07	20	5	62533	44756	1.3972	0.150053
Zhang-ECH003	N05	ECH003-N05	N22	20	5	58987	39525	1.4924	0.0546361
Zhang-ECH003	N05	ECH003-N05	I15	20	5	59326	38823	1.52811	0.018837
Zhang-ECH003	N05	ECH003-N05	B04	40	10	64015	48467	1.3208	0.22663
Zhang-ECH003	N05	ECH003-N05	L19	40	10	59512	42111	1.41322	0.133997
Zhang-ECH003	N05	ECH003-N05	G12	40	10	62878	40323	1.55936	-0.0124778
Zhang-ECH003	N07	ECH003-N07	J17	2.5	0.625	59008	39870	1.48001	0.0670516
Zhang-ECH003	N07	ECH003-N07	E10	2.5	0.625	61810	38869	1.59021	-0.0434034
Zhang-ECH003	N07	ECH003-N07	P03	2.5	0.625	59178	38344	1.54334	0.00357249
Zhang-ECH003	N07	ECH003-N07	H14	5	1.25	60245	41687	1.44517	0.101966
Zhang-ECH003	N07	ECH003-N07	C07	5	1.25	62604	40361	1.5511	-0.00420208
Zhang-ECH003	N07	ECH003-N07	M22	5	1.25	60538	38111	1.58847	-0.0416514
Zhang-ECH003	N07	ECH003-N07	F11	10	2.5	61178	43373	1.41051	0.136712
Zhang-ECH003	N07	ECH003-N07	A04	10	2.5	63494	38893	1.63253	-0.085817
Zhang-ECH003	N07	ECH003-N07	K19	10	2.5	58907	36823	1.59973	-0.0529457
Zhang-ECH003	N07	ECH003-N07	D08	20	5	62776	44505	1.41054	0.136682
Zhang-ECH003	N07	ECH003-N07	N23	20	5	60987	40423	1.50872	0.0382758
Zhang-ECH003	N07	ECH003-N07	I16	20	5	58748	39574	1.48451	0.0625413
Zhang-ECH003	N07	ECH003-N07	B05	40	10	62519	41507	1.50623	0.0407739
Zhang-ECH003	N07	ECH003-N07	L20	40	10	59547	42048	1.41617	0.13104
Zhang-ECH003	N07	ECH003-N07	G13	40	10	61800	38970	1.58584	-0.0390154
Zhang-ECH003	N09	ECH003-N09	J18	2.5	0.625	60311	40590	1.48586	0.0611897
Zhang-ECH003	N09	ECH003-N09	E11	2.5	0.625	60786	38789	1.56709	-0.0202311
Zhang-ECH003	N09	ECH003-N09	P04	2.5	0.625	58156	37658	1.54432	0.00259479
Zhang-ECH003	N09	ECH003-N09	H15	5	1.25	60929	42391	1.43731	0.109849
Zhang-ECH003	N09	ECH003-N09	C08	5	1.25	61866	41839	1.47867	0.0683965
Zhang-ECH003	N09	ECH003-N09	M23	5	1.25	62578	35457	1.7649	-0.218487
Zhang-ECH003	N09	ECH003-N09	F12	10	2.5	61876	44346	1.3953	0.151955
Zhang-ECH003	N09	ECH003-N09	A05	10	2.5	63671	39640	1.60623	-0.0594578
Zhang-ECH003	N09	ECH003-N09	K20	10	2.5	60553	36578	1.65545	-0.108788
Zhang-ECH003	N09	ECH003-N09	D09	20	5	61496	43718	1.40665	0.140577
Zhang-ECH003	N09	ECH003-N09	O02	20	5	59326	40156	1.47739	0.0696794
Zhang-ECH003	N09	ECH003-N09	I17	20	5	60137	38391	1.56643	-0.0195706
Zhang-ECH003	N09	ECH003-N09	B06	40	10	62447	42122	1.48253	0.0645289
Zhang-ECH003	N09	ECH003-N09	L21	40	10	58016	39170	1.48113	0.0659255
Zhang-ECH003	N09	ECH003-N09	G14	40	10	60271	38142	1.58017	-0.0333413
Zhang-ECH003	N11	ECH003-N11	J19	2.5	0.625	59326	39487	1.50242	0.0445919
Zhang-ECH003	N11	ECH003-N11	E12	2.5	0.625	62320	40822	1.52663	0.0203273
Zhang-ECH003	N11	ECH003-N11	P05	2.5	0.625	57904	38157	1.51752	0.0294562
Zhang-ECH003	N11	ECH003-N11	H16	5	1.25	60929	42563	1.4315	0.115671
Zhang-ECH003	N11	ECH003-N11	C09	5	1.25	61729	40599	1.52046	0.0265131
Zhang-ECH003	N11	ECH003-N11	N02	5	1.25	61380	40469	1.51672	0.0302613
Zhang-ECH003	N11	ECH003-N11	F13	10	2.5	60100	42773	1.40509	0.142141
Zhang-ECH003	N11	ECH003-N11	A06	10	2.5	59982	39420	1.52161	0.0253532
Zhang-ECH003	N11	ECH003-N11	K21	10	2.5	59120	38082	1.55244	-0.00554329
Zhang-ECH003	N11	ECH003-N11	D10	20	5	60952	44478	1.37039	0.176927
Zhang-ECH003	N11	ECH003-N11	O03	20	5	56163	42673	1.31612	0.231311
Zhang-ECH003	N11	ECH003-N11	I18	20	5	56483	37841	1.49264	0.0543925
Zhang-ECH003	N11	ECH003-N11	B07	40	10	48429	47152	1.02708	0.521014
Zhang-ECH003	N11	ECH003-N11	L22	40	10	41042	42841	0.958008	0.590246
Zhang-ECH003	N11	ECH003-N11	G15	40	10	45665	40272	1.13391	0.413938
Zhang-ECH003	N15	ECH003-N15	J20	2.5	0.625	59155	40558	1.45853	0.0885822
Zhang-ECH003	N15	ECH003-N15	E13	2.5	0.625	61259	39847	1.53736	0.00957525
Zhang-ECH003	N15	ECH003-N15	P06	2.5	0.625	58378	37436	1.55941	-0.0125278
Zhang-ECH003	N15	ECH003-N15	H17	5	1.25	60222	42236	1.42585	0.12134
Zhang-ECH003	N15	ECH003-N15	C10	5	1.25	61579	41176	1.49551	0.0515191
Zhang-ECH003	N15	ECH003-N15	N03	5	1.25	60874	40741	1.49417	0.0528588
Zhang-ECH003	N15	ECH003-N15	F14	10	2.5	60431	42475	1.42274	0.12445
Zhang-ECH003	N15	ECH003-N15	A07	10	2.5	60750	38616	1.57318	-0.0263333
Zhang-ECH003	N15	ECH003-N15	K22	10	2.5	60007	36956	1.62374	-0.0770084
Zhang-ECH003	N15	ECH003-N15	D11	20	5	61371	43556	1.40901	0.13821
Zhang-ECH003	N15	ECH003-N15	O04	20	5	48425	39152	1.23685	0.310771
Zhang-ECH003	N15	ECH003-N15	I19	20	5	58223	37409	1.55639	-0.00950302
Zhang-ECH003	N15	ECH003-N15	B08	40	10	48446	48183	1.00546	0.542687
Zhang-ECH003	N15	ECH003-N15	L23	40	10	39355	42724	0.921145	0.627193
Zhang-ECH003	N15	ECH003-N15	G16	40	10	47176	40895	1.15359	0.394219
Zhang-ECH003	N17	ECH003-N17	J21	2.5	0.625	60614	40282	1.50474	0.0422636
Zhang-ECH003	N17	ECH003-N17	E14	2.5	0.625	60630	38063	1.59289	-0.0460817
Zhang-ECH003	N17	ECH003-N17	P07	2.5	0.625	60718	37248	1.6301	-0.0833822
Zhang-ECH003	N17	ECH003-N17	H18	5	1.25	61662	42523	1.45009	0.0970441
Zhang-ECH003	N17	ECH003-N17	C11	5	1.25	62888	40444	1.55494	-0.0080497
Zhang-ECH003	N17	ECH003-N17	N04	5	1.25	51459	30206	1.7036	-0.157051
Zhang-ECH003	N17	ECH003-N17	F15	10	2.5	62876	41800	1.50421	0.0427958
Zhang-ECH003	N17	ECH003-N17	A08	10	2.5	62886	39686	1.58459	-0.0377663
Zhang-ECH003	N17	ECH003-N17	K23	10	2.5	60005	37704	1.59148	-0.0446687
Zhang-ECH003	N17	ECH003-N17	D12	20	5	63360	43702	1.44982	0.0973114
Zhang-ECH003	N17	ECH003-N17	O05	20	5	53196	40317	1.31944	0.227985
Zhang-ECH003	N17	ECH003-N17	I20	20	5	62570	38081	1.64308	-0.0963875
Zhang-ECH003	N17	ECH003-N17	B09	40	10	53241	46279	1.15044	0.397379
Zhang-ECH003	N17	ECH003-N17	M02	40	10	38932	44466	0.875545	0.672897
Zhang-ECH003	N17	ECH003-N17	G17	40	10	48119	41784	1.15161	0.396199
Zhang-ECH003	O07	ECH003-O07	J22	2.5	0.625	60618	40887	1.48257	0.0644818
Zhang-ECH003	O07	ECH003-O07	E15	2.5	0.625	61729	38397	1.60765	-0.0608816
Zhang-ECH003	O07	ECH003-O07	P08	2.5	0.625	61238	38091	1.60768	-0.0609063
Zhang-ECH003	O07	ECH003-O07	H19	5	1.25	61180	41463	1.47553	0.0715394
Zhang-ECH003	O07	ECH003-O07	C12	5	1.25	63122	41755	1.51172	0.035266
Zhang-ECH003	O07	ECH003-O07	N05	5	1.25	62119	39508	1.57231	-0.0254637
Zhang-ECH003	O07	ECH003-O07	F16	10	2.5	61818	43315	1.42717	0.120009
Zhang-ECH003	O07	ECH003-O07	A09	10	2.5	65471	40216	1.62798	-0.0812603
Zhang-ECH003	O07	ECH003-O07	L02	10	2.5	58036	39475	1.4702	0.0768877
Zhang-ECH003	O07	ECH003-O07	D13	20	5	61844	43421	1.42429	0.122901
Zhang-ECH003	O07	ECH003-O07	O06	20	5	56595	40636	1.39273	0.15453
Zhang-ECH003	O07	ECH003-O07	I21	20	5	65114	38867	1.6753	-0.128687
Zhang-ECH003	O07	ECH003-O07	B10	40	10	65298	46815	1.39481	0.152447
Zhang-ECH003	O07	ECH003-O07	M03	40	10	57150	41069	1.39156	0.155703
Zhang-ECH003	O07	ECH003-O07	G18	40	10	61548	39338	1.56459	-0.0177256
Zhang-ECH003	O09	ECH003-O09	J23	2.5	0.625	60741	40624	1.4952	0.051827
Zhang-ECH003	O09	ECH003-O09	E16	2.5	0.625	62357	38040	1.63925	-0.0925503
Zhang-ECH003	O09	ECH003-O09	P09	2.5	0.625	61387	38165	1.60846	-0.061695
Zhang-ECH003	O09	ECH003-O09	H20	5	1.25	61224	45046	1.35914	0.188194
Zhang-ECH003	O09	ECH003-O09	C13	5	1.25	61547	39059	1.57574	-0.0289014
Zhang-ECH003	O09	ECH003-O09	N06	5	1.25	60665	40992	1.47992	0.0671389
Zhang-ECH003	O09	ECH003-O09	F17	10	2.5	62253	42034	1.48102	0.066044
Zhang-ECH003	O09	ECH003-O09	A10	10	2.5	63320	39674	1.59601	-0.0492108
Zhang-ECH003	O09	ECH003-O09	L03	10	2.5	57897	41949	1.38018	0.167114
Zhang-ECH003	O09	ECH003-O09	D14	20	5	64379	41851	1.53829	0.0086379
Zhang-ECH003	O09	ECH003-O09	O07	20	5	58533	38438	1.52279	0.024174
Zhang-ECH003	O09	ECH003-O09	I22	20	5	66031	38117	1.73232	-0.185839
Zhang-ECH003	O09	ECH003-O09	B11	40	10	61936	44216	1.40076	0.146483
Zhang-ECH003	O09	ECH003-O09	M04	40	10	58773	43673	1.34575	0.201617
Zhang-ECH003	O09	ECH003-O09	G19	40	10	59890	37599	1.59286	-0.0460577
Zhang-ECH003	O11	ECH003-O11	K02	2.5	0.625	59253	42380	1.39814	0.149113
Zhang-ECH003	O11	ECH003-O11	E17	2.5	0.625	61235	39636	1.54493	0.00197942
Zhang-ECH003	O11	ECH003-O11	P10	2.5	0.625	64713	37060	1.74617	-0.199715
Zhang-ECH003	O11	ECH003-O11	H21	5	1.25	61363	39560	1.55114	-0.00423836
Zhang-ECH003	O11	ECH003-O11	C14	5	1.25	60262	40039	1.50508	0.0419218
Zhang-ECH003	O11	ECH003-O11	N07	5	1.25	61655	39635	1.55557	-0.00868054
Zhang-ECH003	O11	ECH003-O11	F18	10	2.5	62622	42901	1.45969	0.0874218
Zhang-ECH003	O11	ECH003-O11	A11	10	2.5	60938	40618	1.50027	0.0467445
Zhang-ECH003	O11	ECH003-O11	L04	10	2.5	57795	40298	1.43419	0.112976
Zhang-ECH003	O11	ECH003-O11	D15	20	5	63366	43315	1.46291	0.0841894
Zhang-ECH003	O11	ECH003-O11	O08	20	5	54415	41720	1.30429	0.243172
Zhang-ECH003	O11	ECH003-O11	I23	20	5	64812	38743	1.67287	-0.126249
Zhang-ECH003	O11	ECH003-O11	B12	40	10	32641	48571	0.672027	0.876881
Zhang-ECH003	O11	ECH003-O11	M05	40	10	44017	42775	1.02904	0.519056
Zhang-ECH003	O11	ECH003-O11	G20	40	10	50822	41161	1.23471	0.312909
Zhang-ECH003	O15	ECH003-O15	K03	2.5	0.625	59880	42174	1.41983	0.127367
Zhang-ECH003	O15	ECH003-O15	E18	2.5	0.625	62490	38216	1.63518	-0.0884718
Zhang-ECH003	O15	ECH003-O15	P11	2.5	0.625	60194	35745	1.68398	-0.137388
Zhang-ECH003	O15	ECH003-O15	H22	5	1.25	62406	41842	1.49147	0.0555675
Zhang-ECH003	O15	ECH003-O15	C15	5	1.25	61834	41567	1.48757	0.0594701
Zhang-ECH003	O15	ECH003-O15	N08	5	1.25	61586	39616	1.55457	-0.00768261
Zhang-ECH003	O15	ECH003-O15	F19	10	2.5	62784	41720	1.50489	0.0421151
Zhang-ECH003	O15	ECH003-O15	A12	10	2.5	61744	40020	1.54283	0.00408955
Zhang-ECH003	O15	ECH003-O15	L05	10	2.5	66585	37795	1.76174	-0.215323
Zhang-ECH003	O15	ECH003-O15	D16	20	5	65836	42754	1.53988	0.00704556
Zhang-ECH003	O15	ECH003-O15	O09	20	5	58585	41265	1.41973	0.127473
Zhang-ECH003	O15	ECH003-O15	J02	20	5	63957	39406	1.62303	-0.076292
Zhang-ECH003	O15	ECH003-O15	B13	40	10	58995	47554	1.24059	0.307019
Zhang-ECH003	O15	ECH003-O15	M06	40	10	47786	42783	1.11694	0.430952
Zhang-ECH003	O15	ECH003-O15	G21	40	10	53109	39117	1.3577	0.189645
Zhang-ECH003	P03	ECH003-P03	K04	2.5	0.625	58902	44974	1.30969	0.237761
Zhang-ECH003	P03	ECH003-P03	E19	2.5	0.625	61409	39719	1.54609	0.000824435
Zhang-ECH003	P03	ECH003-P03	P12	2.5	0.625	58347	38359	1.52108	0.0258906
Zhang-ECH003	P03	ECH003-P03	H23	5	1.25	62029	41402	1.49821	0.0488074
Zhang-ECH003	P03	ECH003-P03	C16	5	1.25	62098	40886	1.51881	0.0281646
Zhang-ECH003	P03	ECH003-P03	N09	5	1.25	58745	38849	1.51214	0.0348515
Zhang-ECH003	P03	ECH003-P03	F20	10	2.5	62387	42102	1.48181	0.0652514
Zhang-ECH003	P03	ECH003-P03	A13	10	2.5	61171	39209	1.56013	-0.0132479
Zhang-ECH003	P03	ECH003-P03	L06	10	2.5	64637	38201	1.69202	-0.145446
Zhang-ECH003	P03	ECH003-P03	D17	20	5	65535	43702	1.49959	0.0474288
Zhang-ECH003	P03	ECH003-P03	O10	20	5	54148	41077	1.31821	0.229224
Zhang-ECH003	P03	ECH003-P03	J03	20	5	59943	39300	1.52527	0.0216911
Zhang-ECH003	P03	ECH003-P03	B14	40	10	55588	44985	1.2357	0.311919
Zhang-ECH003	P03	ECH003-P03	M07	40	10	44604	44556	1.00108	0.547078
Zhang-ECH003	P03	ECH003-P03	G22	40	10	48871	40097	1.21882	0.328839
Zhang-ECH003	P07	ECH003-P07	K05	2.5	0.625	58899	41747	1.41086	0.136364
Zhang-ECH003	P07	ECH003-P07	E20	2.5	0.625	62253	38168	1.63103	-0.0843093
Zhang-ECH003	P07	ECH003-P07	P13	2.5	0.625	59102	37337	1.58293	-0.0361073
Zhang-ECH003	P07	ECH003-P07	I02	5	1.25	60430	41775	1.44656	0.100579
Zhang-ECH003	P07	ECH003-P07	C17	5	1.25	62216	39702	1.56707	-0.020212
Zhang-ECH003	P07	ECH003-P07	N10	5	1.25	57444	36898	1.55683	-0.0099462
Zhang-ECH003	P07	ECH003-P07	F21	10	2.5	62360	41406	1.50606	0.0409402
Zhang-ECH003	P07	ECH003-P07	A14	10	2.5	62790	39453	1.59151	-0.044707
Zhang-ECH003	P07	ECH003-P07	L07	10	2.5	59593	39577	1.50575	0.0412545
Zhang-ECH003	P07	ECH003-P07	D18	20	5	66702	44258	1.50712	0.0398823
Zhang-ECH003	P07	ECH003-P07	O11	20	5	59266	40304	1.47047	0.076609
Zhang-ECH003	P07	ECH003-P07	J04	20	5	63076	37798	1.66877	-0.122135
Zhang-ECH003	P07	ECH003-P07	B15	40	10	62864	44058	1.42685	0.120337
Zhang-ECH003	P07	ECH003-P07	M08	40	10	53425	44179	1.20928	0.338395
Zhang-ECH003	P07	ECH003-P07	G23	40	10	60174	37119	1.62111	-0.0743712
Zhang-ECH003	P09	ECH003-P09	K06	2.5	0.625	58857	43499	1.35307	0.194286
Zhang-ECH003	P09	ECH003-P09	E21	2.5	0.625	61913	38912	1.5911	-0.0442951
Zhang-ECH003	P09	ECH003-P09	P14	2.5	0.625	58717	36663	1.60153	-0.0547488
Zhang-ECH003	P09	ECH003-P09	I03	5	1.25	58381	41875	1.39417	0.153085
Zhang-ECH003	P09	ECH003-P09	C18	5	1.25	60900	39027	1.56046	-0.0135803
Zhang-ECH003	P09	ECH003-P09	N11	5	1.25	56652	37820	1.49794	0.0490831
Zhang-ECH003	P09	ECH003-P09	F22	10	2.5	62289	41472	1.50195	0.0450584
Zhang-ECH003	P09	ECH003-P09	A15	10	2.5	62395	40045	1.55812	-0.0112389
Zhang-ECH003	P09	ECH003-P09	L08	10	2.5	57936	38725	1.49609	0.0509371
Zhang-ECH003	P09	ECH003-P09	D19	20	5	66432	42800	1.55215	-0.00525269
Zhang-ECH003	P09	ECH003-P09	O12	20	5	58892	40723	1.44616	0.100978
Zhang-ECH003	P09	ECH003-P09	J05	20	5	60192	39976	1.5057	0.0412995
Zhang-ECH003	P09	ECH003-P09	B16	40	10	64428	45063	1.42973	0.117445
Zhang-ECH003	P09	ECH003-P09	M09	40	10	55505	42074	1.31922	0.228206
Zhang-ECH003	P09	ECH003-P09	H02	40	10	59172	42237	1.40095	0.14629
Zhang-ECH003	P11	ECH003-P11	K07	2.5	0.625	60143	43055	1.39689	0.150364
Zhang-ECH003	P11	ECH003-P11	E22	2.5	0.625	61890	37093	1.66851	-0.121878
Zhang-ECH003	P11	ECH003-P11	P15	2.5	0.625	57993	37826	1.53315	0.0137884
Zhang-ECH003	P11	ECH003-P11	I04	5	1.25	61479	43353	1.4181	0.1291
Zhang-ECH003	P11	ECH003-P11	C19	5	1.25	60506	37819	1.59988	-0.0530958
Zhang-ECH003	P11	ECH003-P11	N12	5	1.25	57245	38687	1.4797	0.0673663
Zhang-ECH003	P11	ECH003-P11	F23	10	2.5	61579	41976	1.467	0.0800864
Zhang-ECH003	P11	ECH003-P11	A16	10	2.5	60215	39753	1.51473	0.0322539
Zhang-ECH003	P11	ECH003-P11	L09	10	2.5	64641	40396	1.60018	-0.0533961
Zhang-ECH003	P11	ECH003-P11	D20	20	5	65372	43362	1.50759	0.0394113
Zhang-ECH003	P11	ECH003-P11	O13	20	5	56724	40576	1.39797	0.14928
Zhang-ECH003	P11	ECH003-P11	J06	20	5	58721	39189	1.49841	0.0486144
Zhang-ECH003	P11	ECH003-P11	B17	40	10	11362	46325	0.245267	1.30461
Zhang-ECH003	P11	ECH003-P11	M10	40	10	39761	44940	0.884757	0.663664
Zhang-ECH003	P11	ECH003-P11	H03	40	10	46391	40495	1.1456	0.402227
Zhang-ECH004	A19	ECH004-A19	K08	2.5	0.625	59279	41822	1.41741	0.129793
Zhang-ECH004	A19	ECH004-A19	E23	2.5	0.625	61057	36549	1.67055	-0.123925
Zhang-ECH004	A19	ECH004-A19	P16	2.5	0.625	58844	37222	1.58089	-0.0340618
Zhang-ECH004	A19	ECH004-A19	I05	5	1.25	61971	41071	1.50887	0.0381208
Zhang-ECH004	A19	ECH004-A19	C20	5	1.25	61702	39728	1.55311	-0.00621651
Zhang-ECH004	A19	ECH004-A19	N13	5	1.25	57206	39323	1.45477	0.0923473
Zhang-ECH004	A19	ECH004-A19	G02	10	2.5	75624	45164	1.67443	-0.127813
Zhang-ECH004	A19	ECH004-A19	A17	10	2.5	60846	41265	1.47452	0.0725558
Zhang-ECH004	A19	ECH004-A19	L10	10	2.5	62431	39282	1.5893	-0.042491
Zhang-ECH004	A19	ECH004-A19	D21	20	5	63886	39154	1.63166	-0.0849444
Zhang-ECH004	A19	ECH004-A19	O14	20	5	60533	38847	1.55824	-0.0113584
Zhang-ECH004	A19	ECH004-A19	J07	20	5	59776	37772	1.58255	-0.0357205
Zhang-ECH004	A19	ECH004-A19	B18	40	10	63593	40677	1.56337	-0.0164938
Zhang-ECH004	A19	ECH004-A19	M11	40	10	59870	39947	1.49874	0.048283
Zhang-ECH004	A19	ECH004-A19	H04	40	10	63753	39541	1.61233	-0.0655671
Zhang-ECH004	D21	ECH004-D21	K09	2.5	0.625	58129	42768	1.35917	0.188167
Zhang-ECH004	D21	ECH004-D21	F02	2.5	0.625	62521	41206	1.51728	0.0296975
Zhang-ECH004	D21	ECH004-D21	P17	2.5	0.625	59038	35614	1.65772	-0.111063
Zhang-ECH004	D21	ECH004-D21	I06	5	1.25	61116	41980	1.45584	0.0912807
Zhang-ECH004	D21	ECH004-D21	C21	5	1.25	61189	40326	1.51736	0.0296178
Zhang-ECH004	D21	ECH004-D21	N14	5	1.25	57606	38014	1.51539	0.0315917
Zhang-ECH004	D21	ECH004-D21	G03	10	2.5	73758	43063	1.71279	-0.166263
Zhang-ECH004	D21	ECH004-D21	A18	10	2.5	60829	41894	1.45197	0.0951516
Zhang-ECH004	D21	ECH004-D21	L11	10	2.5	62733	39570	1.58537	-0.0385467
Zhang-ECH004	D21	ECH004-D21	D22	20	5	69105	41150	1.67934	-0.132738
Zhang-ECH004	D21	ECH004-D21	O15	20	5	58801	41018	1.43354	0.113626
Zhang-ECH004	D21	ECH004-D21	J08	20	5	58835	38770	1.51754	0.0294366
Zhang-ECH004	D21	ECH004-D21	B19	40	10	60738	43537	1.39509	0.152166
Zhang-ECH004	D21	ECH004-D21	M12	40	10	54746	43309	1.26408	0.283476
Zhang-ECH004	D21	ECH004-D21	H05	40	10	56722	39648	1.43064	0.116535
Zhang-ECH004	F13	ECH004-F13	K10	2.5	0.625	58694	43501	1.34926	0.198104
Zhang-ECH004	F13	ECH004-F13	F03	2.5	0.625	63333	37921	1.67013	-0.123503
Zhang-ECH004	F13	ECH004-F13	P18	2.5	0.625	59141	35725	1.65545	-0.10879
Zhang-ECH004	F13	ECH004-F13	I07	5	1.25	61437	43303	1.41877	0.128431
Zhang-ECH004	F13	ECH004-F13	C22	5	1.25	61776	38557	1.6022	-0.0554168
Zhang-ECH004	F13	ECH004-F13	N15	5	1.25	58323	37029	1.57506	-0.0282183
Zhang-ECH004	F13	ECH004-F13	G04	10	2.5	74411	46558	1.59824	-0.0514515
Zhang-ECH004	F13	ECH004-F13	A19	10	2.5	59272	39093	1.51618	0.0307996
Zhang-ECH004	F13	ECH004-F13	L12	10	2.5	62648	38744	1.61697	-0.0702242
Zhang-ECH004	F13	ECH004-F13	D23	20	5	84126	42468	1.98093	-0.435009
Zhang-ECH004	F13	ECH004-F13	O16	20	5	55582	40272	1.38016	0.167125
Zhang-ECH004	F13	ECH004-F13	J09	20	5	58495	40886	1.43069	0.116489
Zhang-ECH004	F13	ECH004-F13	B20	40	10	48857	42885	1.13926	0.408584
Zhang-ECH004	F13	ECH004-F13	M13	40	10	43430	44609	0.97357	0.574648
Zhang-ECH004	F13	ECH004-F13	H06	40	10	48768	40765	1.19632	0.351389
Zhang-ECH004	I13	ECH004-I13	K11	2.5	0.625	58183	43120	1.34933	0.198033
Zhang-ECH004	I13	ECH004-I13	F04	2.5	0.625	61319	40244	1.52368	0.0232813
Zhang-ECH004	I13	ECH004-I13	P19	2.5	0.625	59893	34803	1.72091	-0.174404
Zhang-ECH004	I13	ECH004-I13	I08	5	1.25	60119	43521	1.38138	0.165908
Zhang-ECH004	I13	ECH004-I13	C23	5	1.25	60188	33583	1.79222	-0.245868
Zhang-ECH004	I13	ECH004-I13	N16	5	1.25	61186	37616	1.6266	-0.0798683
Zhang-ECH004	I13	ECH004-I13	G05	10	2.5	72012	42241	1.70479	-0.158241
Zhang-ECH004	I13	ECH004-I13	A20	10	2.5	59737	38276	1.56069	-0.0138134
Zhang-ECH004	I13	ECH004-I13	L13	10	2.5	65293	37226	1.75396	-0.207526
Zhang-ECH004	I13	ECH004-I13	E02	20	5	59305	46968	1.26267	0.28489
Zhang-ECH004	I13	ECH004-I13	O17	20	5	58429	42134	1.38674	0.160532
Zhang-ECH004	I13	ECH004-I13	J10	20	5	63076	38819	1.62487	-0.0781437
Zhang-ECH004	I13	ECH004-I13	B21	40	10	52255	44692	1.16922	0.378547
Zhang-ECH004	I13	ECH004-I13	M14	40	10	46305	42882	1.07982	0.468152
Zhang-ECH004	I13	ECH004-I13	H07	40	10	53125	42136	1.2608	0.286764
Zhang-ECH004	J13	ECH004-J13	K12	2.5	0.625	58445	44688	1.30785	0.239609
Zhang-ECH004	J13	ECH004-J13	F05	2.5	0.625	61969	39186	1.58141	-0.0345766
Zhang-ECH004	J13	ECH004-J13	P20	2.5	0.625	59476	36909	1.61142	-0.0646612
Zhang-ECH004	J13	ECH004-J13	I09	5	1.25	58847	43340	1.3578	0.189542
Zhang-ECH004	J13	ECH004-J13	D02	5	1.25	61232	40730	1.50336	0.0436447
Zhang-ECH004	J13	ECH004-J13	N17	5	1.25	61032	38543	1.58348	-0.0366529
Zhang-ECH004	J13	ECH004-J13	G06	10	2.5	65676	43115	1.52327	0.0236878
Zhang-ECH004	J13	ECH004-J13	A21	10	2.5	65099	39151	1.66277	-0.116123
Zhang-ECH004	J13	ECH004-J13	L14	10	2.5	63160	36666	1.72258	-0.176069
Zhang-ECH004	J13	ECH004-J13	E03	20	5	59373	47077	1.26119	0.286372
Zhang-ECH004	J13	ECH004-J13	O18	20	5	58057	41229	1.40816	0.139066
Zhang-ECH004	J13	ECH004-J13	J11	20	5	59798	38292	1.56163	-0.0147565
Zhang-ECH004	J13	ECH004-J13	B22	40	10	53326	44243	1.2053	0.342391
Zhang-ECH004	J13	ECH004-J13	M15	40	10	46465	43437	1.06971	0.478289
Zhang-ECH004	J13	ECH004-J13	H08	40	10	51442	45170	1.13885	0.408988
Zhang-ECH004	K13	ECH004-K13	K13	2.5	0.625	59352	41779	1.42062	0.126579
Zhang-ECH004	K13	ECH004-K13	F06	2.5	0.625	60941	40678	1.49813	0.0488886
Zhang-ECH004	K13	ECH004-K13	P21	2.5	0.625	60658	36547	1.65973	-0.113075
Zhang-ECH004	K13	ECH004-K13	I10	5	1.25	60885	41807	1.45634	0.0907806
Zhang-ECH004	K13	ECH004-K13	D03	5	1.25	62597	40794	1.53447	0.0124714
Zhang-ECH004	K13	ECH004-K13	N18	5	1.25	61698	37318	1.6533	-0.106638
Zhang-ECH004	K13	ECH004-K13	G07	10	2.5	61729	45326	1.36189	0.185442
Zhang-ECH004	K13	ECH004-K13	A22	10	2.5	60484	39623	1.52649	0.0204683
Zhang-ECH004	K13	ECH004-K13	L15	10	2.5	62500	37535	1.66511	-0.118474
Zhang-ECH004	K13	ECH004-K13	E04	20	5	62742	47952	1.30843	0.23902
Zhang-ECH004	K13	ECH004-K13	O19	20	5	60067	41389	1.45128	0.0958479
Zhang-ECH004	K13	ECH004-K13	J12	20	5	62789	37804	1.66091	-0.11426
Zhang-ECH004	K13	ECH004-K13	B23	40	10	60923	44788	1.36025	0.187082
Zhang-ECH004	K13	ECH004-K13	M16	40	10	54560	42393	1.287	0.260498
Zhang-ECH004	K13	ECH004-K13	H09	40	10	59126	42161	1.40239	0.144853
Zhang-ECH004	K15	ECH004-K15	K14	2.5	0.625	58742	42637	1.37772	0.169572
Zhang-ECH004	K15	ECH004-K15	F07	2.5	0.625	61969	41474	1.49417	0.0528643
Zhang-ECH004	K15	ECH004-K15	P22	2.5	0.625	62350	36729	1.69757	-0.151004
Zhang-ECH004	K15	ECH004-K15	I11	5	1.25	61028	41307	1.47743	0.0696424
Zhang-ECH004	K15	ECH004-K15	D04	5	1.25	62726	41328	1.51776	0.029215
Zhang-ECH004	K15	ECH004-K15	N19	5	1.25	62606	37493	1.66981	-0.123177
Zhang-ECH004	K15	ECH004-K15	G08	10	2.5	66209	43740	1.51369	0.0332901
Zhang-ECH004	K15	ECH004-K15	A23	10	2.5	62026	37120	1.67096	-0.124334
Zhang-ECH004	K15	ECH004-K15	L16	10	2.5	62963	37813	1.66512	-0.118476
Zhang-ECH004	K15	ECH004-K15	E05	20	5	63413	42752	1.48328	0.0637785
Zhang-ECH004	K15	ECH004-K15	O20	20	5	60271	40553	1.48623	0.0608195
Zhang-ECH004	K15	ECH004-K15	J13	20	5	64403	38294	1.6818	-0.135203
Zhang-ECH004	K15	ECH004-K15	C02	40	10	57738	49044	1.17727	0.370484
Zhang-ECH004	K15	ECH004-K15	M17	40	10	52286	43358	1.20591	0.341774
Zhang-ECH004	K15	ECH004-K15	H10	40	10	55901	38847	1.439	0.108151
Zhang-ECH004	M13	ECH004-M13	K15	2.5	0.625	61631	41221	1.49514	0.0518911
Zhang-ECH004	M13	ECH004-M13	F08	2.5	0.625	61686	40504	1.52296	0.0240028
Zhang-ECH004	M13	ECH004-M13	I12	5	1.25	60132	42011	1.43134	0.115833
Zhang-ECH004	M13	ECH004-M13	D05	5	1.25	61896	38965	1.5885	-0.0416887
Zhang-ECH004	M13	ECH004-M13	N20	5	1.25	66315	38000	1.74513	-0.198676
Zhang-ECH004	M13	ECH004-M13	G09	10	2.5	63811	44524	1.43318	0.113986
Zhang-ECH004	M13	ECH004-M13	B02	10	2.5	60410	40635	1.48665	0.060397
Zhang-ECH004	M13	ECH004-M13	L17	10	2.5	63077	38383	1.64336	-0.0966692
Zhang-ECH004	M13	ECH004-M13	E06	20	5	60980	45807	1.33124	0.216164
Zhang-ECH004	M13	ECH004-M13	O21	20	5	59401	41103	1.44517	0.101967
Zhang-ECH004	M13	ECH004-M13	J14	20	5	60814	37867	1.60599	-0.0592155
Zhang-ECH004	M13	ECH004-M13	C03	40	10	58407	46277	1.26212	0.285442
Zhang-ECH004	M13	ECH004-M13	M18	40	10	53129	46480	1.14305	0.404781
Zhang-ECH004	M13	ECH004-M13	H11	40	10	55683	40150	1.38687	0.1604
Zhang-ECH004	O13	ECH004-O13	K16	2.5	0.625	61279	42477	1.44264	0.104507
Zhang-ECH004	O13	ECH004-O13	F09	2.5	0.625	62186	42683	1.45693	0.0901877
Zhang-ECH004	O13	ECH004-O13	P23	2.5	0.625	61231	37420	1.63632	-0.0896129
Zhang-ECH004	O13	ECH004-O13	I13	5	1.25	59817	42016	1.42367	0.123518
Zhang-ECH004	O13	ECH004-O13	D06	5	1.25	63686	39986	1.59271	-0.0459032
Zhang-ECH004	O13	ECH004-O13	N21	5	1.25	61136	37320	1.63816	-0.0914561
Zhang-ECH004	O13	ECH004-O13	G10	10	2.5	63300	45857	1.38038	0.166911
Zhang-ECH004	O13	ECH004-O13	B03	10	2.5	59852	39617	1.51077	0.0362258
Zhang-ECH004	O13	ECH004-O13	L18	10	2.5	59243	37427	1.58289	-0.0360681
Zhang-ECH004	O13	ECH004-O13	E07	20	5	39686	49577	0.800492	0.748122
Zhang-ECH004	O13	ECH004-O13	O22	20	5	42912	41390	1.03677	0.511302
Zhang-ECH004	O13	ECH004-O13	J15	20	5	44950	40386	1.11301	0.43489
Zhang-ECH004	O13	ECH004-O13	C04	40	10	26193	49295	0.531352	1.01788
Zhang-ECH004	O13	ECH004-O13	M19	40	10	23621	49664	0.475616	1.07374
Zhang-ECH004	O13	ECH004-O13	H12	40	10	28465	43538	0.653797	0.895152
zzControls	P11	rols-P11	A24		0	22810	44171	0.516402	1.03286
zzControls	P11	rols-P11	B01		0	26898	47560	0.565559	0.983591
zzControls	P11	rols-P11	B24		0	25140	45765	0.549328	0.999859
zzControls	P11	rols-P11	C01		0	27354	45524	0.60087	0.9482
zzControls	P11	rols-P11	C24		0	28375	45670	0.621305	0.927718
zzControls	P11	rols-P11	D01		0	24875	46827	0.531211	1.01802
zzControls	P11	rols-P11	D24		0	29676	45416	0.653426	0.895524
zzControls	P11	rols-P11	E01		0	25866	47184	0.548194	1.001
zzControls	P11	rols-P11	E24		0	23446	43353	0.540816	1.00839
zzControls	P11	rols-P11	F01		0	27175	44431	0.611623	0.937423
zzControls	P11	rols-P11	F24		0	23061	43536	0.5297	1.01953
zzControls	P11	rols-P11	G01		0	29146	44500	0.654966	0.89398
zzControls	P11	rols-P11	G24		0	25177	44754	0.562564	0.986593
zzControls	P11	rols-P11	H01		0	24023	44144	0.544196	1.005
zzControls	P11	rols-P11	H24		0	24360	44798	0.543774	1.00543
zzControls	P11	rols-P11	I01		0	25071	41788	0.599957	0.949115
zzControls	P11	rols-P11	I24		0	21941	45444	0.482814	1.06653
zzControls	P11	rols-P11	J01		0	22132	41576	0.532326	1.0169
zzControls	P11	rols-P11	J24		0	22060	42686	0.516797	1.03246
zzControls	P11	rols-P11	K01		0	24425	44024	0.554811	0.994364
zzControls	P11	rols-P11	K24		0	21108	44455	0.474817	1.07454
zzControls	P11	rols-P11	L01		0	23270	42574	0.546578	1.00262
zzControls	P11	rols-P11	L24		0	22429	43034	0.521193	1.02806
zzControls	P11	rols-P11	M01		0	23007	42785	0.537735	1.01148
zzControls	P11	rols-P11	M24		0	22182	43378	0.511365	1.03791
zzControls	P11	rols-P11	N01		0	22334	42319	0.527753	1.02148
zzControls	P11	rols-P11	N24		0	20612	43773	0.470884	1.07848
zzControls	P11	rols-P11	O01		0	22925	40528	0.565658	0.983492
zzControls	P11	rols-P11	O24		0	22554	42081	0.535966	1.01325
zzControls	P11	rols-P11	P01		0	23593	43274	0.5452	1.004
zzControls	P11	rols-P11	P24		0	24186	44416	0.544534	1.00466
zzControls	P11	rols-P11	A01		0	27394	45576	0.601062	0.948007
zzControls	P11	rols-P11	A24		0	22175	46756	0.474271	1.07509
zzControls	P11	rols-P11	B01		0	26108	44057	0.592596	0.956493
zzControls	P11	rols-P11	B24		0	19840	42816	0.463378	1.08601
zzControls	P11	rols-P11	C01		0	27256	46199	0.589969	0.959125
zzControls	P11	rols-P11	C24		0	19741	43309	0.455817	1.09358
zzControls	P11	rols-P11	D01		0	28592	45305	0.6311	0.9179
zzControls	P11	rols-P11	D24		0	20098	43705	0.459856	1.08954
zzControls	P11	rols-P11	E01		0	27409	44485	0.61614	0.932895
zzControls	P11	rols-P11	E24		0	16075	30540	0.526359	1.02288
zzControls	P11	rols-P11	F01		0	26679	44596	0.598238	0.950838
zzControls	P11	rols-P11	F24		0	21119	43132	0.489636	1.05969
zzControls	P11	rols-P11	G01		0	28134	43908	0.640749	0.90823
zzControls	P11	rols-P11	G24		0	19743	41522	0.475483	1.07387
zzControls	P11	rols-P11	H01		0	27215	45346	0.600163	0.948908
zzControls	P11	rols-P11	H24		0	20229	43368	0.46645	1.08293
zzControls	P11	rols-P11	I01		0	25011	42703	0.585697	0.963408
zzControls	P11	rols-P11	I24		0	21190	44405	0.477199	1.07215
zzControls	P11	rols-P11	J01		0	25152	41897	0.600329	0.948742
zzControls	P11	rols-P11	J24		0	20742	41759	0.496707	1.0526
zzControls	P11	rols-P11	K01		0	26133	42225	0.618899	0.93013
zzControls	P11	rols-P11	K24		0	13629	23033	0.591716	0.957374
zzControls	P11	rols-P11	L01		0	24319	43272	0.562003	0.987155
zzControls	P11	rols-P11	L24		0	2751	479	5.74322	-4.20589
zzControls	P11	rols-P11	M01		0	23195	42986	0.539594	1.00962
zzControls	P11	rols-P11	M24		0	10627	21008	0.505855	1.04343
zzControls	P11	rols-P11	N01		0	24689	41922	0.588927	0.96017
zzControls	P11	rols-P11	N24		0	22121	45507	0.486101	1.06323
zzControls	P11	rols-P11	O01		0	24637	41159	0.598581	0.950494
zzControls	P11	rols-P11	O24		0	19755	43712	0.451935	1.09747
zzControls	P11	rols-P11	P01		0	23434	39119	0.599044	0.95003
zzControls	P11	rols-P11	P24		0	21004	46002	0.456589	1.09281
zzControls	P11	rols-P11	A01		0	27768	47133	0.589141	0.959955
