# Supplementary material for: Exploiting the DCAF16–SPIN4 interaction to identify DCAF16 ligands for PROTAC development
Source: Royal Society of Chemistry journal article supplement (doi:10.1039/d4md00681j), 2024-12-06
Supplement: d4md00681j3.xlsx [file d4md00681j3.xlsx]

## Sheet: Summary
TMT tag	Sample
Abundances (Grouped): F1, 126	HEK293T cell lysates, DMSO 2 hours
Abundances (Grouped): F1, 127	HEK293T cell lysates, DMSO 2 hours
Abundances (Grouped): F1, 128	HEK293T cell lysates, 10 µM 2F07 2 hours
Abundances (Grouped): F1, 129	HEK293T cell lysates, 10 µM 2F07 2 hours
Abundances (Grouped): F1, 130	HEK293T cell lysates, 10 µM 2G07 2 hours
Abundances (Grouped): F1, 131	HEK293T cell lysates, 10 µM 2G07 2 hours

## Sheet: 2G07,2F07_ABPP
Annotated Sequence	Modifications	Master Protein Accessions	GeneID+Site	Theo. MH+ [Da]	Abundances (Grouped): F1, 126	Abundances (Grouped): F1, 127	Abundances (Grouped): F1, 128	Abundances (Grouped): F1, 129	Abundances (Grouped): F1, 130	Abundances (Grouped): F1, 131
[K].GQVCLPVISAENWKPATK.[T]	2xTMT6plex [K14; K18]; 1xTMT6plex [N-Term]; 1xIA-DTB [C4]	A0A1B0GUS4	UB2L5_C86	3137.81	135.2	88.9	84.7	101.2	106.5	83.4
[R].KPNVGCQQDSEELLK.[L]	2xTMT6plex [K1; K15]; 1xTMT6plex [N-Term]; 1xIA-DTB [C6]	A0AVT1	UBA6_C347	2884.62	119.6	97.5	99.9	104.1	94.4	84.5
[K].LQNLNIFLVGCGAIGCEMLK.[N]	1xCarbamidomethyl [C11]; 1xTMT6plex [K20]; 1xTMT6plex [N-Term]; 1xIA-DTB [C16]	A0AVT1	UBA6_C473	3160.74	120.4	92.7	89.1	87.9	89	120.8
[K].VCPTTETIYNDEFYTKQDVIITALDNVEAR.[R]	1xTMT6plex [K16]; 1xTMT6plex [N-Term]; 1xIA-DTB [C2]	A0AVT1	UBA6_C546	4429.3	84	81.2	111.7	101.3	74	147.8
[K].VCPTTETIYNDEFYTK.[Q]	1xTMT6plex [K16]; 1xTMT6plex [N-Term]; 1xIA-DTB [C2]	A0AVT1	UBA6_C546	2891.49	93.1	96	118.5	110.1	84.6	97.7
[R].ACDLPAWVHFPDTERAEWLNK.[T]	1xTMT6plex [K21]; 1xTMT6plex [N-Term]; 1xIA-DTB [C2]	A0FGR8	ESYT2_C181	3465.81	58.7	93.9	130.7	97.2	101.2	118.3
[R].ACDLPAWVHFPDTER.[A]	1xTMT6plex [N-Term]; 1xIA-DTB [C2]	A0FGR8	ESYT2_C181	2495.27	65.9	97.2	116.5	119.3	114.5	86.7
[K].KADVIVLAGTVCDFR.[L]	1xTMT6plex [K1]; 1xTMT6plex [N-Term]; 1xIA-DTB [C12]	A1L0T0	HACL2_C354	2574.48	85.1	103.8	110.5	106.3	101.9	92.4
[R].EQVPSLGSNVACGLAYTDYHK.[A]	1xTMT6plex [K21]; 1xTMT6plex [N-Term]; 1xIA-DTB [C12]	A1L0T0	HACL2_C568	3219.69	129.2	90	92	90.4	93.4	105
[R].ASPAEGSAGSPGSPTCCR.[C]	1xCarbamidomethyl [C16]; 1xTMT6plex [N-Term]; 1xIA-DTB [C17]	A4D1S0	KLRG2_C219	2430.17	102.8	115.3	93.3	108.8	72.2	107.7
[K].VSLEPSIMYNVTELNSVSQAGECVSTFGSR.[A]	1xTMT6plex [N-Term]; 1xIA-DTB [C23]	A5PLN9	TPC13_C233	3942.98	96.4	117.9	94.9	97.6	107.9	85.4
[K].LFQSVAQCCMGQK.[Q]	1xCarbamidomethyl [C9]; 1xTMT6plex [K13]; 1xTMT6plex [N-Term]; 1xIA-DTB [C8]	A5YKK6	CNOT1_C2359	2467.3	90.6	115.6	109.9	88.9	80.1	115
[R].CPSILGGLAPEKDQPK.[S]	2xTMT6plex [K12; K16]; 1xTMT6plex [N-Term]; 1xIA-DTB [C1]	A5YKK6	CNOT1_C624	2849.65	69	106	109.7	101.9	103.8	109.6
[R].CPIQLNEGVSFQDLDTAK.[L]	1xTMT6plex [K18]; 1xTMT6plex [N-Term]; 1xIA-DTB [C1]	A6NDU8	RIMC1_C179	2945.58	72.5	105.8	120.8	95.7	88.4	116.8
[K].QCLILGEQIDLLQQYR.[S]	1xTMT6plex [N-Term]; 1xIA-DTB [C2]	A6NHR9	SMHD1_C1899	2671.48	95.4	94.4	104.7	104.2	96.3	105.1
[R].LIPYTSVEDFDWCTPPK.[K]	1xTMT6plex [K17]; 1xTMT6plex [N-Term]; 1xIA-DTB [C13]	A6NHR9	SMHD1_C492	2978.57	97.8	97.5	110.7	109.9	85.8	98.3
[R].ACVCQTLGISPEEK.[F]	1xCarbamidomethyl [C4]; 1xTMT6plex [K14]; 1xTMT6plex [N-Term]; 1xIA-DTB [C2]	A6NHR9	SMHD1_C59	2502.35	90.4	94.8	111.6	91.8	99.3	112.1
[R].SAIPEQIISSTLSSPSSNAPDPCAK.[E]	1xTMT6plex [K25]; 1xTMT6plex [N-Term]; 1xIA-DTB [C23]	A8CG34	P121C_C284	3467.85	81.7	103.4	97.2	106	98	113.7
[K].LALGSFFDDGPGIYTSCSK.[S]	1xTMT6plex [K19]; 1xTMT6plex [N-Term]; 1xIA-DTB [C17]	B3KU38	IQIP1_C358	2945.55	114.9	131.4	76.4	84.3	93.1	99.8
[K].GVQFAPFSTCR.[V]	1xTMT6plex [N-Term]; 1xIA-DTB [C10]	O00116	ADAS_C565	1951.04	110.5	100.4	87.2	96.9	113.1	91.9
[K].QCMMFSATLSK.[D]	1xTMT6plex [K11]; 1xTMT6plex [N-Term]; 1xIA-DTB [C2]	O00148	DX39A_C223	2214.18	75.6	100.2	88.2	106	118.3	111.6
[K].AALANLCIGDVITAIDGENTSNMTHLEAQNR.[I]	1xTMT6plex [N-Term]; 1xIA-DTB [C7]	O00151	PDLI1_C45	3994.03	119	82.5	119.7	92.9	88.8	97.2
[R].LLQFYAETCPAPER.[G]	1xTMT6plex [N-Term]; 1xIA-DTB [C9]	O00159	MYO1C_C161	2376.26	96.8	93.4	101.2	114.8	81.8	112
[K].IDMCPANILQETLK.[L]	1xTMT6plex [K14]; 1xTMT6plex [N-Term]; 1xIA-DTB [C4]	O00178	GTPB1_C313	2556.43	92.5	83.8	82.9	86.7	132	122
[K].AAYIYFTDFCPDNLFNK.[I]	1xTMT6plex [K17]; 1xTMT6plex [N-Term]; 1xIA-DTB [C10]	O00186	STXB3_C114	3009.56	132.5	86.2	63.3	58.7	131.3	128.1
[R].LAFRPCGNANPHK.[W]	1xTMT6plex [K13]; 1xTMT6plex [N-Term]; 1xIA-DTB [C6]	O00189	AP4M1_C431	2392.34	84.5	120.2	95.9	100.2	98.9	100.3
[R].AIYDTPCIQAESEKWQQALK.[S]	2xTMT6plex [K14; K20]; 1xTMT6plex [N-Term]; 1xIA-DTB [C7]	O00232	PSD12_C255	3518.93	115.4	83.5	115.1	92.9	91	102.2
[K].GIGMNEPLVDCEGYPR.[S]	1xTMT6plex [N-Term]; 1xIA-DTB [C11]	O00233	PSMD9_C59	2488.25	115.4	83.1	104.6	95.2	93.6	108.1
[R].VELHSTCQTISVDR.[Q]	1xTMT6plex [N-Term]; 1xIA-DTB [C7]	O00267	SPT5H_C740	2326.24	134.5	73.6	94.3	91.5	95.8	110.2
[R].SCKDETFLLQAPLQR.[R]	1xTMT6plex [K3]; 1xTMT6plex [N-Term]; 1xIA-DTB [C2]	O00268	TAF4_C867	2716.52	91	100.4	106.7	101.1	98	102.7
[K].ASCLVQTPPGQYSGNSFK.[K]	1xTMT6plex [K18]; 1xTMT6plex [N-Term]; 1xIA-DTB [C3]	O00311	CDC7_C499	2851.52	125.7	112.5	78.5	53.2	109	121
[K].TIECISLIGLAVGK.[E]	1xTMT6plex [K14]; 1xTMT6plex [N-Term]; 1xIA-DTB [C4]	O00410	IPO5_C560	2384.44	82.3	83.7	83.9	115.7	123.7	110.8
[K].STACQMLVCYAK.[E]	1xCarbamidomethyl [C4]; 1xOxidation [M6]; 1xTMT6plex [K12]; 1xTMT6plex [N-Term]; 1xIA-DTB [C9]	O00410	IPO5_C687	2358.24	83.7	106.5	111.7	100.1	92.8	105.1
[K].STACQMLVCYAK.[E]	1xCarbamidomethyl [C4]; 1xTMT6plex [K12]; 1xTMT6plex [N-Term]; 1xIA-DTB [C9]	O00410	IPO5_C687	2342.24	78.9	108.1	112.8	101.8	93.3	105.2
[R].QWGLCIFDDVIEHCSPASFK.[Y]	1xCarbamidomethyl [C14]; 1xTMT6plex [K20]; 1xTMT6plex [N-Term]; 1xIA-DTB [C5]	O00410	IPO5_C886	3319.7	125.4	70.2	111.2	93.2	91.2	108.9
[K].YAEYFLRPMLQYVCDNSPEVR.[Q]	1xTMT6plex [N-Term]; 1xIA-DTB [C14]	O00410	IPO5_C915	3331.68	90.5	94.7	110.9	99.5	87.9	116.5
[R].VCVVSVEKPTLPSK.[E]	2xTMT6plex [K8; K14]; 1xTMT6plex [N-Term]; 1xIA-DTB [C2]	O00411	RPOM_C413	2682.62	83.6	102.6	111.3	107.5	97.2	97.8
[K].LLAEMLVQATQMPCSLDKPHR.[S]	1xTMT6plex [K18]; 1xTMT6plex [N-Term]; 1xIA-DTB [C14]	O00411	RPOM_C591	3348.84	110	78.2	99.8	105.3	86.7	120.1
[K].GCPQLGVPAPPSEAPQPPEAHLPHSAAPAR.[K]	1xTMT6plex [N-Term]; 1xIA-DTB [C2]	O00411	RPOM_C726	3717.95	128.3	112.4	91.5	91.1	79.1	97.6
[K].YIETSELCGGAR.[I]	1xTMT6plex [N-Term]; 1xIA-DTB [C8]	O00429	DNM1L_C361	2037.06	100.7	89.9	117.4	99.7	88.5	103.7
[K].LHDAIVEVVTCLLR.[K]	1xTMT6plex [N-Term]; 1xIA-DTB [C11]	O00429	DNM1L_C470	2319.34	32.3	112.3	118.2	125.2	149.8	62.2
[R].LQLLTFSAMCQNLAR.[T]	1xTMT6plex [N-Term]; 1xIA-DTB [C10]	O00443	P3C2A_C514	2447.35	87.6	111.6	114.1	94.8	83.4	108.5
[R].LALFNPDVCWDR.[N]	1xTMT6plex [N-Term]; 1xIA-DTB [C9]	O00483	NDUA4_C44	2187.16	105.9	104.3	83.6	92.4	115.1	98.7
[K].SWMEGLTLQDYSEHCK.[H]	1xTMT6plex [K16]; 1xTMT6plex [N-Term]; 1xIA-DTB [C15]	O00487	PSDE_C238	2894.46	130.8	79.5	91.9	95.5	102.6	99.7
[K].SWMEGLTLQDYSEHCK.[H]	1xOxidation [M3]; 1xTMT6plex [K16]; 1xTMT6plex [N-Term]; 1xIA-DTB [C15]	O00487	PSDE_C238	2910.45	137.6	86.6	98.5	96.2	88.8	92.4
[K].AGEGTYALDSESCMEK.[L]	1xTMT6plex [K16]; 1xTMT6plex [N-Term]; 1xIA-DTB [C13]	O00541	PESC_C272	2658.32	98.5	94.5	122.3	91.6	85.9	107.3
[K].ATGRPECFLTIQEGLASK.[F]	1xTMT6plex [K18]; 1xTMT6plex [N-Term]; 1xIA-DTB [C7]	O00566	MPP10_C27	2888.61	93	95.9	109.8	100.8	96.2	104.3
[K].IGAAIQEELGYNCQTGGVIAEILR.[G]	1xTMT6plex [N-Term]; 1xIA-DTB [C13]	O00567	NOP56_C112	3256.76	80.5	88.9	118.2	120.8	90.1	101.4
[R].IDCFSEVPTSVFGEK.[L]	1xTMT6plex [K15]; 1xTMT6plex [N-Term]; 1xIA-DTB [C3]	O00567	NOP56_C384	2625.4	80.4	108.9	97.1	104.7	101	107.9
[R].LAALALASSENSSSTPEECEEMSEKPK.[K]	2xTMT6plex [K25; K27]; 1xTMT6plex [N-Term]; 1xIA-DTB [C19]	O00567	NOP56_C472	4035.09	78.9	90.7	106.9	122.5	99.3	101.8
[R].LVAFCPFASSQVALENANAVSEGVVHEDLR.[L]	1xTMT6plex [N-Term]; 1xIA-DTB [C5]	O00567	NOP56_C52	3911.03	96.5	84.6	104	104.2	89.3	121.4
[R].WCDKSDEDDWSKPLPPSER.[L]	2xTMT6plex [K4; K12]; 1xTMT6plex [N-Term]; 1xIA-DTB [C2]	O00571	DDX3X_C128	3486.79	46.4	106.1	122	122.3	119.3	83.9
[R].DLMACAQTGSGK.[T]	1xTMT6plex [K12]; 1xTMT6plex [N-Term]; 1xIA-DTB [C5]	O00571	DDX3X_C223	2149.15	84.8	91.2	108.1	97	103.6	115.2
[R].VRPCVVYGGADIGQQIR.[D]	1xTMT6plex [N-Term]; 1xIA-DTB [C4]	O00571	DDX3X_C298	2569.42	92.2	99.7	108.1	89.4	107.7	102.8
[K].DQVAYLIQQNVIPPFCNLLTVK.[D]	1xTMT6plex [K22]; 1xTMT6plex [N-Term]; 1xIA-DTB [C16]	O00629	IMA3_C417	3483.98	95.5	76.5	76	94.7	137.1	120.2
[K].GAFCDLVWSDPEDVDTWAISPR.[G]	1xTMT6plex [N-Term]; 1xIA-DTB [C4]	O00743	PPP6_C192	3217.58	113.5	86.4	103.8	98.1	90.7	107.5
[K].FLTPCYHPNVDTQGNICLDILK.[E]	1xCarbamidomethyl [C5]; 1xTMT6plex [K22]; 1xTMT6plex [N-Term]; 1xIA-DTB [C17]	O00762	UBE2C_C114	3528.87	111.1	98.9	91.3	75.6	100.7	122.4
[K].GPADMASQCWGAAAAAAAAAAASGGAQQR.[S]	1xOxidation [M5]; 1xTMT6plex [N-Term]; 1xIA-DTB [C9]	O14497	ARI1A_C336	3342.63	118.8	85.1	107.8	90.8	100.9	96.6
[K].GPADMASQCWGAAAAAAAAAAASGGAQQR.[S]	1xTMT6plex [N-Term]; 1xIA-DTB [C9]	O14497	ARI1A_C336	3326.63	126.6	107.8	92.7	100	82.2	90.7
[R].STSGPRPGCQPSSPCVPK.[L]	1xCarbamidomethyl [C15]; 1xTMT6plex [K18]; 1xTMT6plex [N-Term]; 1xIA-DTB [C9]	O14545	TRAD1_C476	2809.49	84.6	134.2	88.8	98.4	93.4	100.6
[K].LMCPQEIVDYIADKK.[D]	2xTMT6plex [K14; K15]; 1xTMT6plex [N-Term]; 1xIA-DTB [C3]	O14561	ACPM_C140	2962.67	97.1	86.8	104.1	111.9	105.4	94.8
[K].LMCPQEIVDYIADKKDVYE.[-]	2xTMT6plex [K14; K15]; 1xTMT6plex [N-Term]; 1xIA-DTB [C3]	O14561	ACPM_C140	3468.87	82	86.2	121.9	112.5	101.7	95.7
[K].CSPTLLLLNGQAACHMAQGR.[W]	1xCarbamidomethyl [C14]; 1xTMT6plex [N-Term]; 1xIA-DTB [C1]	O14579	COPE_C212	2879.5	89.1	101.9	110.6	104.5	110	83.8
[K].DLSSPSQYDTGVALTGLSCFVTPDLAR.[D]	1xTMT6plex [N-Term]; 1xIA-DTB [C19]	O14617	AP3D1_C137	3551.83	103.3	111.2	104.1	85.8	94.2	101.3
[K].GNSCILADEMGLGK.[T]	1xTMT6plex [K14]; 1xTMT6plex [N-Term]; 1xIA-DTB [C4]	O14646	CHD1_C502	2375.28	106	100.7	103.1	87.6	98.1	104.6
[R].CGTLGAQPDGEPAALAAAAAAEPPFYK.[D]	1xTMT6plex [K27]; 1xTMT6plex [N-Term]; 1xIA-DTB [C1]	O14654	IRS4_C206	3554.87	73.8	115.4	93.5	104.6	98.6	114.1
[R].RCGTLGAQPDGEPAALAAAAAAEPPFYK.[D]	1xTMT6plex [K28]; 1xTMT6plex [N-Term]; 1xIA-DTB [C2]	O14654	IRS4_C206	3710.97	82.2	96.6	106.2	103.1	99.5	112.3
[R].GSGGGQGSNGQGSSSHSSGGNQCSGEGQGSR.[G]	1xTMT6plex [N-Term]; 1xIA-DTB [C23]	O14654	IRS4_C522	3490.55	180	78.4	77	90.9	83.6	90
[R].IAESLPGVESCQNYLFR.[Y]	1xTMT6plex [N-Term]; 1xIA-DTB [C11]	O14686	KMT2D_C5314	2664.4	92.9	98	110.9	90.6	101	106.5
[K].CPWAIPQNTISCSLADVMSEQLAK.[E]	1xCarbamidomethyl [C12]; 1xTMT6plex [K24]; 1xTMT6plex [N-Term]; 1xIA-DTB [C1]	O14730	RIOK3_C22	3629.89	75	111.9	109	98	103	103.2
[R].YQAEINDLENLGEMGSGTCGQVWK.[M]	1xTMT6plex [K24]; 1xTMT6plex [N-Term]; 1xIA-DTB [C19]	O14733	MP2K7_C131	3609.81	86.2	90.6	129.7	92.1	97.5	103.9
[R].SAGCAAYMAPER.[I]	1xTMT6plex [N-Term]; 1xIA-DTB [C4]	O14733	MP2K7_C280	1964.99	85.1	107.6	110.7	89.9	95.2	111.5
[R].DLNCVPEIADTLGAVAK.[Q]	1xTMT6plex [K17]; 1xTMT6plex [N-Term]; 1xIA-DTB [C4]	O14744	ANM5_C22	2696.51	105.6	84.5	89.7	111.2	109.5	99.5
[K].EFCSYLQYLEYLSQNRPPPNAYELFAK.[G]	1xTMT6plex [K27]; 1xTMT6plex [N-Term]; 1xIA-DTB [C3]	O14744	ANM5_C278	4251.2	136.7	79.7	80.2	130.6	96.5	76.4
[K].LVQGISFSQPTCPDHMLLNSQLLGTPGSSQNPWQR.[L]	1xTMT6plex [N-Term]; 1xIA-DTB [C12]	O14757	CHK1_C349	4575.34	160.8	94.5	76.8	70.8	87.7	109.3
[K].SELGLQSITFSIFPDIPECSGK.[T]	1xTMT6plex [K22]; 1xTMT6plex [N-Term]; 1xIA-DTB [C19]	O14772	FPGT_C408	3335.8	80.1	100.2	127.7	105.3	80.6	106.2
[R].VPLPGMPIPLPGVAMMQIVSCPYVK.[T]	1xTMT6plex [K25]; 1xTMT6plex [N-Term]; 1xIA-DTB [C21]	O14776	TCRG1_C388	3605.03	153.8	177.2	68.7	47.9	58.9	93.4
[K].AKPVATAPIPGTPWCVVWTGDER.[V]	1xTMT6plex [K2]; 1xTMT6plex [N-Term]; 1xIA-DTB [C15]	O14776	TCRG1_C535	3418.87	116.4	90	96	107.3	101.8	88.3
[K].FNPEAGANCLVK.[Y]	1xTMT6plex [K12]; 1xTMT6plex [N-Term]; 1xIA-DTB [C9]	O14777	NDC80_C449	2230.24	85	109.1	108.5	86.3	95	116.1
[R].LLVPPLCIRPSVVSDLK.[S]	1xTMT6plex [K17]; 1xTMT6plex [N-Term]; 1xIA-DTB [C7]	O14802	RPC1_C261	2816.72	104.6	106.3	102.7	84.3	94.1	107.9
[K].LQQQPGCTAEETLEALILK.[E]	1xTMT6plex [K19]; 1xTMT6plex [N-Term]; 1xIA-DTB [C7]	O14802	RPC1_C742	3052.71	83.5	94.9	105.5	92.2	108.2	115.7
[R].KICALDDNVCMAFAGLTADAR.[I]	1xCarbamidomethyl [C10]; 1xTMT6plex [K1]; 1xTMT6plex [N-Term]; 1xIA-DTB [C3]	O14818	PSA7_C63	3222.68	109.8	86.3	95	93.1	104.1	111.7
[R].CLPFIIGCNPTILHVHELYIR.[A]	1xCarbamidomethyl [C8]; 1xTMT6plex [N-Term]; 1xIA-DTB [C1]	O14874	BCKD_C111	3246.78	94.9	86.8	102.8	111.5	100.5	103.4
[K].VDENFDCVEADDVEGK.[I]	1xTMT6plex [K16]; 1xTMT6plex [N-Term]; 1xIA-DTB [C7]	O14929	HAT1_C101	2751.35	98.7	109.7	109.1	99.5	84.2	98.8
[R].VLVTQQFPCQNPLPVNSGQAQR.[V]	1xTMT6plex [N-Term]; 1xIA-DTB [C9]	O14965	AURKA_C33	3162.7	107	119.8	65.3	70.9	114.4	122.7
[R].EVLEHPWITANSSKPSNCQNK.[E]	2xTMT6plex [K14; K21]; 1xTMT6plex [N-Term]; 1xIA-DTB [C18]	O14965	AURKA_C393	3578.94	128.3	114.7	55.4	57.4	130.3	113.8
[R].AIIQEVCFMK.[K]	1xTMT6plex [K10]; 1xTMT6plex [N-Term]; 1xIA-DTB [C7]	O14976	GAK_C87	2149.23	116.4	100	103.7	92.2	88.2	99.6
[R].QMSVPGIFNPHEIPEEMCD.[-]	1xTMT6plex [N-Term]; 1xIA-DTB [C18]	O14980	XPO1_C1070	2911.4	85.4	94.1	114.5	94.9	92.8	118.2
[R].QLLDFSQKLDINLLDNVVNCLYHGEGAQQR.[M]	1xTMT6plex [K8]; 1xTMT6plex [N-Term]; 1xIA-DTB [C20]	O14980	XPO1_C34	4411.36	69.1	89.1	161.7	63.3	73.3	143.5
[K].LDINLLDNVVNCLYHGEGAQQR.[M]	1xTMT6plex [N-Term]; 1xIA-DTB [C12]	O14980	XPO1_C34	3222.69	113.3	84.1	117.7	92.5	90.8	101.5
[K].CLSENISAAIQANGEMVTK.[Q]	1xTMT6plex [K19]; 1xTMT6plex [N-Term]; 1xIA-DTB [C1]	O14980	XPO1_C723	2946.58	69.9	104.6	107.2	105.7	98.3	114.3
[K].CLSENISAAIQANGEMVTK.[Q]	1xOxidation [M16]; 1xTMT6plex [K19]; 1xTMT6plex [N-Term]; 1xIA-DTB [C1]	O14980	XPO1_C723	2962.57	78.3	97.9	118.1	103.5	95.2	107.2
[R].AKCDVDETVSSATLSEETEKPK.[L]	3xTMT6plex [K2; K20; K22]; 1xTMT6plex [N-Term]; 1xIA-DTB [C3]	O14981	BTAF1_C1542	3793.07	102.6	97.3	104.9	103.8	94.8	96.5
[R].RANNNAAVAPTTCPLQPVTDPFAFSR.[Q]	1xTMT6plex [N-Term]; 1xIA-DTB [C13]	O15027	SC16A_C46	3496.83	72.2	103.6	119.5	103.9	99.9	100.9
[K].DCPDNPHIWLQLEGPK.[E]	1xTMT6plex [K16]; 1xTMT6plex [N-Term]; 1xIA-DTB [C2]	O15037	KHNYN_C46	2829.51	102.1	100	100.9	105.6	93.9	97.4
[R].EFCPLYYLLNAIPTK.[I]	1xTMT6plex [K15]; 1xTMT6plex [N-Term]; 1xIA-DTB [C3]	O15040	TCPR2_C14	2752.55	109.9	116.1	85.8	118.4	83.6	86.3
[R].GLAPLHWADDDGNPTEQYPLNPNGSPGGVAGICSCDGR.[H]	1xCarbamidomethyl [C33]; 1xTMT6plex [N-Term]; 1xIA-DTB [C35]	O15067	PUR4_C1287	4646.2	142.3	82.2	91.9	99.9	98.3	85.4
[R].HVVFTAETHNFPTGVCPFSGATTGTGGR.[I]	1xTMT6plex [N-Term]; 1xIA-DTB [C16]	O15067	PUR4_C318	3586.81	115.6	109.2	83.7	79.1	109.6	102.9
[R].IVLVDDRECPVR.[R]	1xTMT6plex [N-Term]; 1xIA-DTB [C9]	O15067	PUR4_C606	2152.21	111	95.5	96	99.1	99.9	98.5
[R].IVLVDDRECPVRR.[N]	1xTMT6plex [N-Term]; 1xIA-DTB [C9]	O15067	PUR4_C606	2308.31	98.8	99.1	109.3	99.3	96.9	96.5
[K].KLMWLFGCPLLLDDVAR.[E]	1xTMT6plex [K1]; 1xTMT6plex [N-Term]; 1xIA-DTB [C8]	O15067	PUR4_C66	2957.69	90.1	115	117.9	83.8	90	103.3
[K].LMWLFGCPLLLDDVAR.[E]	1xOxidation [M2]; 1xTMT6plex [N-Term]; 1xIA-DTB [C7]	O15067	PUR4_C66	2616.42	75.7	102	115.4	105.9	92.4	108.6
[K].LMWLFGCPLLLDDVAR.[E]	1xTMT6plex [N-Term]; 1xIA-DTB [C7]	O15067	PUR4_C66	2600.43	94.6	108.3	131.4	78.6	87.4	99.7
[R].SLSDCVNYIVQDSK.[I]	1xTMT6plex [K14]; 1xTMT6plex [N-Term]; 1xIA-DTB [C5]	O15111	IKKA_C406	2538.36	130	138.3	92.4	75.7	73.3	90.2
[K].AFGSPMIDLSSPVGGSYNLPSLPDIDCSSTIMLDNIVR.[K]	1xTMT6plex [N-Term]; 1xIA-DTB [C27]	O15164	TIF1A_C629	4720.39	116.1	100.6	106.3	80.5	86.7	109.9
[R].GLATFCLDKDALRDEYDDLSDLNAVQMESVR.[E]	1xTMT6plex [K9]; 1xTMT6plex [N-Term]; 1xIA-DTB [C6]	O15173	PGRC2_C159	4470.27	162.9	60.6	83.3	101	106.1	86.2
[R].GLATFCLDK.[ED]	1xTMT6plex [K9]; 1xTMT6plex [N-Term]; 1xIA-DTB [C6]	O15173	PGRC2_C159	1935.11	127.2	86.3	91.5	111.9	106.2	76.8
[K].ICQADIVEAVDIASAAK.[H]	1xTMT6plex [K17]; 1xTMT6plex [N-Term]; 1xIA-DTB [C2]	O15213	WDR46_C172	2684.51	87.6	103.2	95.7	113.1	103	97.4
[R].CQNIYLTTGYAGSK.[N]	1xTMT6plex [K14]; 1xTMT6plex [N-Term]; 1xIA-DTB [C1]	O15226	NKRF_C246	2486.35	83.1	105.7	92.9	102.8	97.7	117.8
[R].HLSTCDGQNPPKK.[Q]	2xTMT6plex [K12; K13]; 1xTMT6plex [N-Term]; 1xIA-DTB [C5]	O15226	NKRF_C37	2621.48	130.6	90	96.1	90.7	91	101.5
[R].HLSTCDGQNPPK.[K]	1xTMT6plex [K12]; 1xTMT6plex [N-Term]; 1xIA-DTB [C5]	O15226	NKRF_C37	2264.22	137.5	90.6	102.1	93.4	82.5	93.8
[K].RHLSTCDGQNPPK.[K]	1xTMT6plex [K13]; 1xTMT6plex [N-Term]; 1xIA-DTB [C6]	O15226	NKRF_C37	2420.32	41.2	143.6	115.6	108.3	124.7	66.6
[K].DLVVYENSSNPVCTLNDTAQFNR.[M]	1xTMT6plex [N-Term]; 1xIA-DTB [C13]	O15226	NKRF_C453	3337.67	78.8	94.3	121.7	108.9	95.9	100.3
[K].GITPCKPIDIK.[C]	2xTMT6plex [K6; K11]; 1xTMT6plex [N-Term]; 1xIA-DTB [C5]	O15228	GNPAT_C66	2381.46	115.6	93.9	104.8	89.3	102.9	93.5
[K].INNNCIFNVNEPATTKLEEMLGCK.[T]	1xCarbamidomethyl [C5]; 2xTMT6plex [K16; K24]; 1xTMT6plex [N-Term]; 1xIA-DTB [C23]	O15228	GNPAT_C668	3949.1	62.4	116.2	122	102.3	79.9	117.1
[R].LCLISTFLEDGIR.[M]	1xTMT6plex [N-Term]; 1xIA-DTB [C2]	O15260	SURF4_C32	2218.25	136.8	73.3	107.7	117.5	80.9	83.8
[K].CLPPPSIR.[V]	1xTMT6plex [N-Term]; 1xIA-DTB [C1]	O15269	SPTC1_C438	1620.95	82.5	115.4	99.1	99.8	100.1	103.1
[K].ELPYCPLWVSATHLLQGQAWVQLGAQK.[V]	1xTMT6plex [K27]; 1xTMT6plex [N-Term]; 1xIA-DTB [C5]	O15287	FANCG_C448	4004.2	177.9	96.4	111.5	66.1	54.2	93.8
[K].EMQDVQGALQCYTR.[A]	1xTMT6plex [N-Term]; 1xIA-DTB [C11]	O15294	OGT1_C417	2380.2	106.5	86.7	96.3	93.2	110.4	107
[K].VMAEANHFIDLSQIPCNGK.[A]	1xTMT6plex [K19]; 1xTMT6plex [N-Term]; 1xIA-DTB [C16]	O15294	OGT1_C620	3054.63	100.4	102.3	110.6	92.3	86.8	107.6
[R].SCPFADVAPLQLK.[V]	1xTMT6plex [K13]; 1xTMT6plex [N-Term]; 1xIA-DTB [C2]	O15304	SIVA_C6	2356.35	110.9	120.4	79.2	76.2	98.8	114.5
[K].MSAYAFFVQTCR.[E]	1xTMT6plex [N-Term]; 1xIA-DTB [C11]	O15347	HMGB3_C23	2162.11	89.7	91.3	85.9	114.7	119	99.3
[K].MSAYAFFVQTCR.[E]	1xOxidation [M1]; 1xTMT6plex [N-Term]; 1xIA-DTB [C11]	O15347	HMGB3_C23	2178.1	71.1	109.6	118.5	114.1	104.3	82.4
[R].GTEAGQVGEPGIPTGEAGPSCSSASDK.[L]	1xTMT6plex [K27]; 1xTMT6plex [N-Term]; 1xIA-DTB [C21]	O15355	PPM1G_C241	3456.73	139	81.8	79.7	109.3	114.7	75.5
[R].GTEAGQVGEPGIPTGEAGPSCSSASDKLPR.[V]	1xTMT6plex [K27]; 1xTMT6plex [N-Term]; 1xIA-DTB [C21]	O15355	PPM1G_C241	3822.97	115.6	84.3	91.7	111.9	104	92.5
[R].KPAFTEASCPLSR.[L]	1xTMT6plex [K1]; 1xTMT6plex [N-Term]; 1xIA-DTB [C9]	O15357	SHIP2_C926	2374.33	119.7	106	100.5	85.1	89.6	99.1
[R].SALPEVDVGPPAPGAGLPVPALFDSLLTCR.[T]	1xTMT6plex [N-Term]; 1xIA-DTB [C29]	O15360	FANCA_C824	3698.02	76	94.4	126.2	86.1	112.3	104.9
[K].FMTPVIQDNPSGWGPCAVPEQFR.[D]	1xTMT6plex [N-Term]; 1xIA-DTB [C16]	O15371	EIF3D_C19	3314.67	80.1	99.7	114.5	103.2	100.6	102
[K].FMTPVIQDNPSGWGPCAVPEQFR.[D]	1xOxidation [M2]; 1xTMT6plex [N-Term]; 1xIA-DTB [C16]	O15371	EIF3D_C19	3330.66	78.5	92.2	123.5	105	83.6	117.3
[R].YLEVSEPQDIECCGALEYYDK.[A]	1xCarbamidomethyl [C13]; 1xTMT6plex [K21]; 1xTMT6plex [N-Term]; 1xIA-DTB [C12]	O15371	EIF3D_C195	3491.71	90.8	94.1	113.9	95.2	88.5	117.6
[K].TQGNVFATDAILATLMSCTR.[S]	1xTMT6plex [N-Term]; 1xIA-DTB [C18]	O15371	EIF3D_C258	2851.5	75.4	86.4	99.4	129.9	101.1	107.9
[R].MDSLLIAGQINTYCQNIK.[E]	1xTMT6plex [K18]; 1xTMT6plex [N-Term]; 1xIA-DTB [C14]	O15372	EIF3H_C327	2992.64	90.2	102.3	95.3	100.7	101.3	110.3
[K].ICDIAINWAGGLHHAK.[K]	1xTMT6plex [K16]; 1xTMT6plex [N-Term]; 1xIA-DTB [C2]	O15379	HDAC3_C123	2686.5	100.2	105.4	111.5	99.5	93.1	90.4
[R].GVLLHGPPGCGK.[T]	1xTMT6plex [K12]; 1xTMT6plex [N-Term]; 1xIA-DTB [C10]	O15381	NVL_C309	2102.23	123.5	103.7	84.3	89.4	98.5	100.6
[R].IVAQLLTCMDDLNNVAATAR.[V]	1xTMT6plex [N-Term]; 1xIA-DTB [C8]	O15381	NVL_C391	2870.54	85.6	76.7	95.4	103.8	117.1	121.4
[K].ALGLVTPAGVLLAGPPGCGK.[T]	1xTMT6plex [K20]; 1xTMT6plex [N-Term]; 1xIA-DTB [C18]	O15381	NVL_C626	2758.64	122.2	105.9	79	88.2	108.5	96.2
[K].LTPSLLCSMVAK.[N]	1xTMT6plex [K12]; 1xTMT6plex [N-Term]; 1xIA-DTB [C7]	O15417	TNC18_C1762	2230.31	102.1	127	94.7	89.3	86.9	100.1
[K].AFQEVLYVDPSFCR.[A]	1xTMT6plex [N-Term]; 1xIA-DTB [C13]	O15550	KDM6A_C164	2412.26	118.7	90.3	109.6	93.7	102	85.8
[K].SCGVSLATAAAAAAAFGDEEKK.[M]	2xTMT6plex [K21; K22]; 1xTMT6plex [N-Term]; 1xIA-DTB [C2]	O15550	KDM6A_C4	3264.79	75.3	118.9	111.4	99.1	89.6	105.7
[K].FQIYFDNCPLLTIPGR.[T]	1xTMT6plex [N-Term]; 1xIA-DTB [C8]	O43143	DHX15_C307	2635.43	98.9	96.5	115.3	89.8	96.8	102.6
[R].TCTDIKPEWLVK.[I]	2xTMT6plex [K6; K12]; 1xTMT6plex [N-Term]; 1xIA-DTB [C2]	O43143	DHX15_C750	2629.54	79.9	84.6	85.9	123.7	128.6	97.4
[K].AQLSGLQLQPCLYK.[R]	1xTMT6plex [K14]; 1xTMT6plex [N-Term]; 1xIA-DTB [C11]	O43159	RRP8_C451	2529.46	103.7	104.1	119.5	105.9	80.3	86.6
[K].GILVMNTPNGNSLSAAELTCGMIMCLAR.[Q]	1xCarbamidomethyl [C20]; 1xTMT6plex [N-Term]; 1xIA-DTB [C25]	O43175	SERA_C116	3675.87	109.8	85.9	82.6	102.6	117.9	101.3
[K].VLISDSLDPCCRK.[I]	1xCarbamidomethyl [C11]; 1xTMT6plex [K13]; 1xTMT6plex [N-Term]; 1xIA-DTB [C10]	O43175	SERA_C18	2473.37	79.7	102.1	118.9	90	90.6	118.7
[K].VLISDSLDPCCR.[K]	1xCarbamidomethyl [C11]; 1xTMT6plex [N-Term]; 1xIA-DTB [C10]	O43175	SERA_C18	2116.11	95.6	90.4	114.4	97.6	96.6	105.4
[R].CGEEIAVQFVDMVK.[G]	1xTMT6plex [K14]; 1xTMT6plex [N-Term]; 1xIA-DTB [C1]	O43175	SERA_C295	2535.37	84.6	99.6	104.2	101.8	97.6	112.1
[K].NAGNCLSPAVIVGLLK.[E]	1xTMT6plex [K16]; 1xTMT6plex [N-Term]; 1xIA-DTB [C5]	O43175	SERA_C369	2536.5	72.7	110.3	117	101.4	91.8	106.7
[K].QLQEFSTAIEEYNCALTEKK.[Y]	2xTMT6plex [K19; K20]; 1xTMT6plex [N-Term]; 1xIA-DTB [C14]	O43264	ZW10_C124	3541.92	75.4	87.9	131.9	107.3	88.2	109.2
[R].LAPILCDGTATFVDLVPGFR.[R]	1xTMT6plex [N-Term]; 1xIA-DTB [C6]	O43264	ZW10_C568	2843.57	92.4	88.9	113.6	91.4	91	122.8
[R].LAPILCDGTATFVDLVPGFRR.[L]	1xTMT6plex [N-Term]; 1xIA-DTB [C6]	O43264	ZW10_C568	2999.67	76.3	105	121.7	87.8	96	113.2
[R].LGIVWQDVLPVNIYCK.[A]	1xTMT6plex [K16]; 1xTMT6plex [N-Term]; 1xIA-DTB [C15]	O43264	ZW10_C650	2827.63	95	97.9	105	104.9	100.5	96.7
[R].GLAAALLLCQNK.[G]	1xTMT6plex [K12]; 1xTMT6plex [N-Term]; 1xIA-DTB [C9]	O43290	SNUT1_C645	2182.31	110.7	105.7	98.8	97.4	88.6	98.8
[K].MPSVAQFVLTPSTEVCSPR.[Y]	1xTMT6plex [N-Term]; 1xIA-DTB [C16]	O43299	AP5Z1_C775	2787.47	94.5	100.9	99.7	96.6	93.8	114.6
[R].WFCHIQHYPGIR.[Q]	1xTMT6plex [N-Term]; 1xIA-DTB [C3]	O43324	MCA3_C147	2295.22	89.1	105.2	99.3	110.2	102.5	93.8
[R].KAQDCYFMK.[L]	2xTMT6plex [K1; K9]; 1xTMT6plex [N-Term]; 1xIA-DTB [C5]	O43353	RIPK2_C380	2330.3	124.4	117.9	91.9	86.9	88.2	90.8
[R].GYAFITFCGK.[E]	1xTMT6plex [K10]; 1xTMT6plex [N-Term]; 1xIA-DTB [C8]	O43390	HNRPR_C214	2074.16	129.5	87.1	77.3	114.5	109.2	82.3
[K].LGVCANGLLIYK.[D]	1xTMT6plex [K12]; 1xTMT6plex [N-Term]; 1xIA-DTB [C4]	O43491	E41L2_C424	2231.34	86.3	100.1	101.9	105.4	96.8	109.4
[K].FFTVEPQHIPCVLMAFLDHR.[G]	1xTMT6plex [N-Term]; 1xIA-DTB [C11]	O43592	XPOT_C522	3138.66	92.9	95.2	123.3	89.2	91.5	107.7
[R].QASLADCLNHAVGFASR.[T]	1xTMT6plex [N-Term]; 1xIA-DTB [C7]	O43592	XPOT_C650	2498.31	110.2	96.2	113.9	87.3	78.8	113.7
[K].MSSELFTLTYGALVTQLCK.[D]	1xTMT6plex [K19]; 1xTMT6plex [N-Term]; 1xIA-DTB [C18]	O43617	TPPC3_C31	3072.69	82.8	71.3	84.7	122.3	126.5	112.3
[R].LIVLLLECKR.[S]	1xTMT6plex [K9]; 1xTMT6plex [N-Term]; 1xIA-DTB [C8]	O43683	BUB1_C1080	2167.38	90.3	115	88.1	75.5	108	123.1
[R].APCLPVTYQQTPVNMEK.[N]	1xTMT6plex [K17]; 1xTMT6plex [N-Term]; 1xIA-DTB [C3]	O43683	BUB1_C339	2886.56	136.4	110.5	69	69.6	109	105.6
[K].ELLYFLDSCEPEFK.[A]	1xTMT6plex [K14]; 1xTMT6plex [N-Term]; 1xIA-DTB [C9]	O43747	AP1G1_C392	2700.44	97.7	74.4	95	111.7	96	125.1
[K].ADCASGIFLAAEK.[Y]	1xTMT6plex [K13]; 1xTMT6plex [N-Term]; 1xIA-DTB [C3]	O43747	AP1G1_C400	2263.25	95	92.2	96.3	107.7	108.5	100.2
[R].AICIDPAYSK.[A]	1xTMT6plex [K10]; 1xTMT6plex [N-Term]; 1xIA-DTB [C3]	O43765	SGTA_C153	2048.16	109	92.1	108.2	95.8	91.8	103.1
[R].AFPANAACFLGFEVAMK.[F]	1xTMT6plex [K17]; 1xTMT6plex [N-Term]; 1xIA-DTB [C8]	O43772	MCAT_C283	2754.49	116.2	97.1	88	93.4	106.7	98.7
[R].GMAAPIIGVTPMFAVCFFGFGLGK.[K]	1xOxidation [M]; 1xTMT6plex [K24]; 1xTMT6plex [N-Term]; 1xIA-DTB [C16]	O43772	MCAT_C89	3414.85	117	98.9	91.6	116.3	82.3	93.9
[K].YLCDAYQCADVIWQYGLLK.[K]	1xCarbamidomethyl [C8]; 1xTMT6plex [K19]; 1xTMT6plex [N-Term]; 1xIA-DTB [C3]	O43813	LANC1_C300	3289.72	121.7	91.2	106.1	102.3	86.4	92.4
[R].SAGDGTDWEKEDQCLMPEAWNVDQGVITK.[L]	2xTMT6plex [K10; K29]; 1xTMT6plex [N-Term]; 1xIA-DTB [C14]	O43815	STRN_C316	4419.22	69.7	106.7	123.1	103.2	78.9	118.5
[K].CYIASAGADALAK.[V]	1xTMT6plex [K13]; 1xTMT6plex [N-Term]; 1xIA-DTB [C1]	O43815	STRN_C765	2221.24	74.3	105.5	101.7	105.8	96.8	115.9
[R].GEPGLEQPFWISSVAALLNTDLVATGSHSSCVR.[L]	1xTMT6plex [N-Term]; 1xIA-DTB [C31]	O43818	U3IP2_C399	4180.17	192.6	68.6	79.2	99.7	91	68.9
[K].LCVPAMNVNDSVTK.[Q]	1xTMT6plex [K14]; 1xTMT6plex [N-Term]; 1xIA-DTB [C2]	O43865	SAHH2_C272	2458.36	83	97.5	112.8	103	95.8	107.9
[K].LCVPAMNVNDSVTK.[Q]	1xOxidation [M6]; 1xTMT6plex [K14]; 1xTMT6plex [N-Term]; 1xIA-DTB [C2]	O43865	SAHH2_C272	2474.35	83.7	94	118.2	105.7	105.9	92.5
[K].LAVTSYADIADLMDCGNK.[A]	1xTMT6plex [K18]; 1xTMT6plex [N-Term]; 1xIA-DTB [C15]	O43896	KIF1C_C198	2867.5	89.4	83.8	122.6	93.4	99.6	111.1
[K].FRPNTGCFEPFVLYFPDYSIGNLQK.[I]	1xTMT6plex [K25]; 1xTMT6plex [N-Term]; 1xIA-DTB [C7]	O43913	ORC5_C171	3920.06	92.4	96.3	105.8	90.9	106.1	108.5
[K].AHVFECNLESSVESIISPK.[V]	1xTMT6plex [K19]; 1xTMT6plex [N-Term]; 1xIA-DTB [C6]	O60216	RAD21_C35	3056.65	59.8	125.1	93.6	108.8	130.5	82.1
[K].TGAESISLLELCR.[N]	1xTMT6plex [N-Term]; 1xIA-DTB [C12]	O60216	RAD21_C585	2130.18	88.3	96.6	88.3	107.4	116.9	102.6
[K].YLLADCNEAFIK.[I]	1xTMT6plex [K12]; 1xTMT6plex [N-Term]; 1xIA-DTB [C6]	O60216	RAD21_C78	2367.31	89	98.5	103.4	103.7	101.4	103.9
[K].AAQGPPAPAVPPNTDVMACTQTALLQK.[L]	1xTMT6plex [K27]; 1xTMT6plex [N-Term]; 1xIA-DTB [C19]	O60232	ZNRD2_C152	3657.99	120.6	84.5	112.4	100.4	96.9	85.2
[K].GGLVLFSANSNSSCMELSKK.[I]	2xTMT6plex [K19; K20]; 1xTMT6plex [N-Term]; 1xIA-DTB [C14]	O60256	KPRB_C31	3268.8	109.6	89.4	101	99.2	92.4	108.4
[K].GGLVLFSANSNSSCMELSK.[K]	1xTMT6plex [K19]; 1xTMT6plex [N-Term]; 1xIA-DTB [C14]	O60256	KPRB_C31	2911.54	129.7	86.8	97.9	95.6	96.2	93.8
[R].VLDILEDYCMWR.[N]	1xTMT6plex [N-Term]; 1xIA-DTB [C9]	O60264	SMCA5_C519	2294.19	98.5	88.5	100.6	109.5	96.4	106.6
[K].LWCAVGVNLSGGK.[T]	1xTMT6plex [K13]; 1xTMT6plex [N-Term]; 1xIA-DTB [C3]	O60271	JIP4_C689	2271.3	98.4	109.1	88.4	95.6	110.3	98.3
[K].IVAPTVSQINAEFVTQLACK.[Y]	1xTMT6plex [K20]; 1xTMT6plex [N-Term]; 1xIA-DTB [C19]	O60306	AQR_C28	3099.76	87	102.7	108.3	100.4	92.3	109.3
[K].KIVAPTVSQINAEFVTQLACK.[Y]	2xTMT6plex [K1; K21]; 1xTMT6plex [N-Term]; 1xIA-DTB [C20]	O60306	AQR_C28	3457.02	92.8	93	108.9	102.5	99.6	103.2
[R].EASSAIDVLGETLVAEAYCK.[T]	1xTMT6plex [K20]; 1xTMT6plex [N-Term]; 1xIA-DTB [C19]	O60308	CE104_C445	3036.63	69.6	101.7	101.2	93	99.7	134.8
[R].NLSLAVSDCFWK.[M]	1xTMT6plex [K12]; 1xTMT6plex [N-Term]; 1xIA-DTB [C9]	O60313	OPA1_C551	2350.3	68	114	102.7	102.6	99.1	113.5
[K].ETLQELQCFCK.[Y]	1xCarbamidomethyl [C8]; 1xTMT6plex [K11]; 1xTMT6plex [N-Term]; 1xIA-DTB [C10]	O60318	GANP_C1240	2366.26	86.3	113.5	106.3	101	90.8	102.1
[R].ALAPSAECPIAEENLAR.[G]	1xTMT6plex [N-Term]; 1xIA-DTB [C8]	O60318	GANP_C1285	2493.33	106	93.2	119.5	94.9	91.1	95.4
[K].LVLVLPDVEEQSPESCGR.[I]	1xTMT6plex [N-Term]; 1xIA-DTB [C16]	O60318	GANP_C1377	2708.45	105.5	93.9	119.1	87.9	87.3	106.3
[R].EQLQLSEATGTCLGER.[L]	1xTMT6plex [N-Term]; 1xIA-DTB [C12]	O60318	GANP_C1945	2473.29	85.6	97.1	121.2	94.6	95.2	106.3
[R].KLLPADALVNCDLLLR.[D]	1xTMT6plex [K1]; 1xTMT6plex [N-Term]; 1xIA-DTB [C11]	O60343	TBCD4_C1277	2734.64	98.8	106.6	103.6	96.4	95.3	99.5
[K].LLPADALVNCDLLLR.[D]	1xTMT6plex [N-Term]; 1xIA-DTB [C10]	O60343	TBCD4_C1277	2377.38	108.3	98.9	107.1	100.5	92.1	93.1
[K].SCAHDWVYE.[-]	1xTMT6plex [N-Term]; 1xIA-DTB [C2]	O60361	NDK8_C130	1847.89	137.9	80.4	83.2	97.9	107.2	93.4
[R].GYAFVTFCTK.[E]	1xTMT6plex [K10]; 1xTMT6plex [N-Term]; 1xIA-DTB [C8]	O60506	HNRPQ_C211	2104.17	141.2	80.5	72.8	122.1	114.5	68.9
[R].QAEEIYENIPGLCK.[T]	1xTMT6plex [K14]; 1xTMT6plex [N-Term]; 1xIA-DTB [C13]	O60518	RNBP6_C48	2574.4	106.4	117.2	101	98.3	86.2	90.9
[K].IYLGQLECFSLGNLDAK.[R]	1xTMT6plex [K17]; 1xTMT6plex [N-Term]; 1xIA-DTB [C8]	O60547	GMDS_C237	2851.58	106.9	96.3	105.2	95.8	95.1	100.7
[R].AMELLSACQGPAR.[N]	1xTMT6plex [N-Term]; 1xIA-DTB [C8]	O60551	NMT2_C104	2085.11	103.3	102.7	108	93.2	93.8	99
[R].KAGCAVTSLLASELTK.[D]	2xTMT6plex [K1; K16]; 1xTMT6plex [N-Term]; 1xIA-DTB [C4]	O60610	DIAP1_C1227	2788.66	105.7	99.3	89.2	105.2	112	88.7
[R].VASMPLISSTCDMVSAAYASTK.[E]	1xTMT6plex [K22]; 1xTMT6plex [N-Term]; 1xIA-DTB [C11]	O60664	PLIN3_C39	3200.68	96.3	120.3	71	92.2	110	110.1
[K].TPAILEASAGAIQNLCAGR.[W]	1xTMT6plex [N-Term]; 1xIA-DTB [C16]	O60716	CTND1_C692	2594.43	82.8	85.6	110.4	110.2	104.4	106.6
[K].LHVSVEALVCHR.[K]	1xTMT6plex [N-Term]; 1xIA-DTB [C10]	O60749	SNX2_C332	2101.19	77	96.1	96.9	118.5	109.3	102.2
[K].VFFVESVCDDPDVIAANILEVK.[V]	1xTMT6plex [K22]; 1xTMT6plex [N-Term]; 1xIA-DTB [C8]	O60825	F262_C158	3389.84	80.8	100.2	104.4	110.7	98.1	105.7
[R].IVDDCGGAFTMGVIGGGVFQAIK.[G]	1xTMT6plex [K23]; 1xTMT6plex [N-Term]; 1xIA-DTB [C5]	O60830	TI17B_C17	3222.74	106.8	102.8	80.3	109.1	108.7	92.3
[K].KGQEVCVK.[I]	2xTMT6plex [K1; K8]; 1xTMT6plex [N-Term]; 1xIA-DTB [C6]	O60841	IF2P_C1158	2087.26	95.6	92.5	103.5	105.6	105.5	97.5
[R].APIICVLGHVDTGK.[T]	1xTMT6plex [K14]; 1xTMT6plex [N-Term]; 1xIA-DTB [C5]	O60841	IF2P_C635	2390.4	118	90.5	102.3	88.5	96.3	104.5
[K].CPFIVALNK.[I]	1xTMT6plex [K9]; 1xTMT6plex [N-Term]; 1xIA-DTB [C1]	O60841	IF2P_C749	1972.18	79.1	113.7	108.3	93.4	93	112.6
[K].IGLVEALCGFQFTFK.[H]	1xTMT6plex [K15]; 1xTMT6plex [N-Term]; 1xIA-DTB [C8]	O60884	DNJA2_C280	2640.5	108.7	82.9	77.5	147.9	108.4	74.6
[R].LAACVNLIPQITSIYEWK.[G]	1xTMT6plex [K18]; 1xTMT6plex [N-Term]; 1xIA-DTB [C4]	O60888	CUTA_C96	3029.73	101	94.6	85.9	90.3	113.6	114.7
[R].ENLLLSDSPSCR.[E]	1xTMT6plex [N-Term]; 1xIA-DTB [C11]	O75116	ROCK2_C428	2072.1	104.6	101.4	92	109.6	101.9	90.4
[R].DLQDKNCLLETAK.[L]	2xTMT6plex [K5; K13]; 1xTMT6plex [N-Term]; 1xIA-DTB [C7]	O75116	ROCK2_C607	2687.54	103.3	89.5	101.3	110.8	101.7	93.3
[R].IKNCLNPQFSK.[T]	2xTMT6plex [K2; K11]; 1xTMT6plex [N-Term]; 1xIA-DTB [C4]	O75131	CPNE3_C54	2488.47	80.1	108.2	114.5	99.9	94.4	103
[R].AINEMSVECNFR.[E]	1xTMT6plex [N-Term]; 1xIA-DTB [C9]	O75132	ZBED4_C916	2151.09	124.1	100.5	115	85.6	81	93.8
[R].GDVASCNTQVAEKPVLTAVPGITR.[H]	1xTMT6plex [K13]; 1xTMT6plex [N-Term]; 1xIA-DTB [C6]	O75152	ZC11A_C588	3393.89	130.8	89.6	89.6	100.8	104.7	84.5
[K].CAAQTLEK.[R]	1xTMT6plex [K8]; 1xTMT6plex [N-Term]; 1xIA-DTB [C1]	O75152	ZC11A_C636	1831.05	92.8	101.8	90.1	110.5	111.7	93
[R].ERPLCPLQPQNR.[D]	1xTMT6plex [N-Term]; 1xIA-DTB [C5]	O75153	CLU_C200	2189.22	82.8	101	100.4	91.6	102.3	121.9
[K].DAAAFLLSCQIPGLVK.[D]	1xTMT6plex [K16]; 1xTMT6plex [N-Term]; 1xIA-DTB [C9]	O75153	CLU_C753	2613.52	96.2	87.3	106.1	99.4	112.1	98.9
[K].LSETISEGTSNSLSTCTK.[S]	1xTMT6plex [K18]; 1xTMT6plex [N-Term]; 1xIA-DTB [C16]	O75179	ANR17_C1690	2825.5	100.9	91.9	85.8	107.5	117.6	96.2
[K].AGADIELGCSTPLMEAAQEGHLELVK.[Y]	1xTMT6plex [K26]; 1xTMT6plex [N-Term]; 1xIA-DTB [C9]	O75179	ANR17_C564	3649.93	110	93.2	116.3	88.3	84	108.3
[R].QLEAAVGGAQALSCLTGSR.[A]	1xTMT6plex [N-Term]; 1xIA-DTB [C14]	O75191	XYLB_C161	2570.39	87.8	97.8	114.3	94	93.1	112.9
[K].LLEYIEEISCASDQVEK.[Y]	1xTMT6plex [K17]; 1xTMT6plex [N-Term]; 1xIA-DTB [C10]	O75330	HMMR_C242	2936.57	115.5	94.3	75.5	91.6	116.9	106.3
[R].CIPQLDPFTTFQAWQLATK.[G]	1xTMT6plex [K19]; 1xTMT6plex [N-Term]; 1xIA-DTB [C1]	O75362	ZN217_C286	3175.74	80.8	132.1	96.4	83.7	91.9	115.1
[R].SAVETQANNLICR.[T]	1xTMT6plex [N-Term]; 1xIA-DTB [C12]	O75362	ZN217_C641	2157.16	103.9	110.9	90	95.9	102.3	96.9
[R].APSVATVGSICDLNLK.[I]	1xTMT6plex [K16]; 1xTMT6plex [N-Term]; 1xIA-DTB [C11]	O75369	FLNB_C2115	2555.46	134.7	82.6	101.1	105.6	102	74
[K].SGCIVNNLAEFTVDPK.[D]	1xTMT6plex [K16]; 1xTMT6plex [N-Term]; 1xIA-DTB [C3]	O75369	FLNB_C660	2674.46	72.7	96.4	115.6	98.6	98.3	118.3
[R].ESPVSAPLEGLICR.[A]	1xTMT6plex [N-Term]; 1xIA-DTB [C13]	O75376	NCOR1_C1274	2209.22	100	110.3	100.3	92.7	90.2	106.5
[K].SVPDCVLYYYLTK.[K]	1xTMT6plex [K13]; 1xTMT6plex [N-Term]; 1xIA-DTB [C5]	O75376	NCOR1_C474	2531.4	99.6	88.7	88.3	90.6	112.4	120.4
[R].GFSIPECQK.[L]	1xTMT6plex [K9]; 1xTMT6plex [N-Term]; 1xIA-DTB [C7]	O75390	CISY_C101	1976.1	125.2	84.8	80.5	110.4	114.8	84.3
[R].MVSEAGTGFCFNTK.[R]	1xTMT6plex [K14]; 1xTMT6plex [N-Term]; 1xIA-DTB [C10]	O75394	RM33_C29	2459.28	90.3	103.8	96.8	114.7	98.2	96.2
[K].FHFGDSLCTHKGEIPALPPCK.[F]	1xCarbamidomethyl [C20]; 2xTMT6plex [K11; K21]; 1xTMT6plex [N-Term]; 1xIA-DTB [C8]	O75439	MPPB_C265	3550.93	68.6	97.8	115.9	103.1	127.3	87.3
[K].QPCPSESDIITEEDKSK.[K]	2xTMT6plex [K15; K17]; 1xTMT6plex [N-Term]; 1xIA-DTB [C3]	O75475	PSIP1_C204	3102.66	99	85.4	83.4	125.8	129	77.5
[K].IYFGSNIPNMFVDSSCALK.[Y]	1xTMT6plex [K19]; 1xTMT6plex [N-Term]; 1xIA-DTB [C16]	O75477	ERLN1_C312	3073.63	103.3	105	95.9	107.7	106.6	81.4
[K].GAETWFDSYDCSK.[F]	1xTMT6plex [K13]; 1xTMT6plex [N-Term]; 1xIA-DTB [C11]	O75503	CLN5_C231	2476.22	134.5	102.8	84	95	93.3	90.4
[R].WLSDECTNAVVNFLSR.[K]	1xTMT6plex [N-Term]; 1xIA-DTB [C6]	O75521	ECI2_C380	2592.34	78.1	109.3	111.6	105.7	87.8	107.4
[R].ICFELLELLK.[A]	1xTMT6plex [K10]; 1xTMT6plex [N-Term]; 1xIA-DTB [C2]	O75533	SF3B1_C1059	2188.32	102.7	91.6	85.2	118.2	117	85.3
[R].VAIGPCR.[M]	1xTMT6plex [N-Term]; 1xIA-DTB [C6]	O75533	SF3B1_C1244	1453.85	94.1	108.6	98.9	99.1	101.2	98.2
[K].IVQQIAILMGCAILPHLR.[S]	1xTMT6plex [N-Term]; 1xIA-DTB [C11]	O75533	SF3B1_C677	2727.61	74.2	82	125.9	114	95.7	108.3
[K].QCCGTDGVEANYIK.[T]	1xCarbamidomethyl [C3]; 1xTMT6plex [K14]; 1xTMT6plex [N-Term]; 1xIA-DTB [C2]	O75533	SF3B1_C795	2525.29	87.7	95.5	96.7	110.1	104	106.1
[R].VKPYLPQICGTVLWR.[L]	1xTMT6plex [K2]; 1xTMT6plex [N-Term]; 1xIA-DTB [C9]	O75533	SF3B1_C933	2740.61	92.3	101	95.8	104.8	106	100
[R].ATVECVKDQFGFINYEVGDSKK.[L]	3xTMT6plex [K7; K21; K22]; 1xTMT6plex [N-Term]; 1xIA-DTB [C5]	O75534	CSDE1_C680	3903.15	88.3	93.6	115.4	93.1	89	120.6
[R].ATVECVKDQFGFINYEVGDSK.[K]	2xTMT6plex [K7; K21]; 1xTMT6plex [N-Term]; 1xIA-DTB [C5]	O75534	CSDE1_C680	3545.89	93	92.9	126.1	87.2	88.3	112.4
[R].VLTAVHGIQSAFDEAMSYCR.[Y]	1xTMT6plex [N-Term]; 1xIA-DTB [C19]	O75586	MED6_C137	2936.5	128.2	105.5	64.9	84.4	113.8	103.1
[R].CSILSPELALPTGSR.[A]	1xTMT6plex [N-Term]; 1xIA-DTB [C1]	O75592	MYCB2_C1169	2282.27	75.7	105.9	124.2	95.8	81.9	116.5
[K].GASCSAQGFDYGLGNSK.[G]	1xTMT6plex [K17]; 1xTMT6plex [N-Term]; 1xIA-DTB [C4]	O75592	MYCB2_C2700	2629.34	138.9	92.8	90.8	87	94.3	96.2
[K].AASQNMIFPSPGSCAVLK.[K]	1xTMT6plex [K18]; 1xTMT6plex [N-Term]; 1xIA-DTB [C14]	O75592	MYCB2_C3190	2788.53	100.9	108.7	103.3	84.2	92.7	110.1
[R].CDAEAGRGDDYDPR.[E]	1xTMT6plex [N-Term]; 1xIA-DTB [C1]	O75592	MYCB2_C4558	2278.07	70	118.3	90.2	102	94.2	125.3
[K].QLEGTECPLHVVHPPTGEEFALGCGVCR.[N]	2xCarbamidomethyl [C7; C24]; 1xTMT6plex [N-Term]; 1xIA-DTB [C27]	O75592	MYCB2_C4672	3830.9	72.8	115.9	92.4	99	132.9	87
[R].LVATDGAFSMDGDIAPLQEICCLASR.[Y]	1xCarbamidomethyl [C21]; 1xOxidation [M10]; 1xTMT6plex [N-Term]; 1xIA-DTB [C22]	O75600	KBL_C219	3507.75	107.7	84.3	121.1	94	94.4	98.5
[K].LAGVTALSCWLPLR.[A]	1xTMT6plex [N-Term]; 1xIA-DTB [C9]	O75608	LYPA1_C144	2238.3	96.1	108.9	82.1	108	104.1	100.8
[R].CQALGVITEKETQVILLDTPGIISPGK.[Q]	2xTMT6plex [K10; K27]; 1xTMT6plex [N-Term]; 1xIA-DTB [C1]	O75616	ERAL1_C150	4020.34	80.1	107.6	102.1	117.6	79.8	112.8
[R].DILCGAADEVLAVLK.[N]	1xTMT6plex [K15]; 1xTMT6plex [N-Term]; 1xIA-DTB [C4]	O75643	U520_C133	2497.45	92.9	80.9	101	127.6	113.6	84.1
[R].CTLSANLVASGELMSSK.[K]	1xTMT6plex [K17]; 1xTMT6plex [N-Term]; 1xIA-DTB [C1]	O75643	U520_C238	2678.46	79.2	107.6	113.9	100.4	90.2	108.7
[R].LATYGITVAELTGDHQLCK.[E]	1xTMT6plex [K19]; 1xTMT6plex [N-Term]; 1xIA-DTB [C18]	O75643	U520_C576	3000.66	107.8	85.4	99.8	109.8	103.4	93.7
[R].TPNPDIVCNK.[H]	1xTMT6plex [K10]; 1xTMT6plex [N-Term]; 1xIA-DTB [C8]	O75648	MTU1_C101	2068.16	86.5	105.2	114.9	91.6	95.6	106.2
[R].KAEEATEAQEVVEATPEGACTEPR.[E]	1xTMT6plex [K1]; 1xTMT6plex [N-Term]; 1xIA-DTB [C20]	O75683	SURF6_C189	3512.79	105.8	86.2	98.5	110.5	107.2	91.8
[K].ESECITKPVSFLPQNKEEIER.[T]	2xTMT6plex [K7; K16]; 1xTMT6plex [N-Term]; 1xIA-DTB [C4]	O75691	UTP20_C1757	3673.02	86.7	103.2	94.6	114.3	105.1	96.2
[R].LPPQSCLLLPPTPVR.[G]	1xTMT6plex [N-Term]; 1xIA-DTB [C6]	O75691	UTP20_C2058	2369.39	126.9	114.6	80.6	86.7	104.2	87.1
[K].VLYLLELYCEDK.[Q]	1xTMT6plex [K12]; 1xTMT6plex [N-Term]; 1xIA-DTB [C9]	O75691	UTP20_C2571	2468.39	108.3	88.4	91.7	120.4	111.7	79.4
[K].EHFGTFFECLQESLLDLHTK.[V]	1xTMT6plex [K20]; 1xTMT6plex [N-Term]; 1xIA-DTB [C9]	O75691	UTP20_C295	3361.77	33.6	116.7	126.7	105.4	146	71.5
[R].RVPLPPELVEQFGHMQCNCMMGVFPPISR.[A]	1xCarbamidomethyl [C19]; 1xOxidation [M15]; 1xTMT6plex [N-Term]; 1xIA-DTB [C17]	O75694	NU155_C102	4124.07	100	89.5	111.5	97.8	97.8	103.4
[R].RVPLPPELVEQFGHMQCNCMMGVFPPISR.[A]	1xCarbamidomethyl [C19]; 1xTMT6plex [N-Term]; 1xIA-DTB [C17]	O75694	NU155_C102	4108.08	91.6	96.7	111.9	102.1	96.4	101.3
[R].VPLPPELVEQFGHMQCNCMMGVFPPISR.[A]	1xCarbamidomethyl [C18]; 1xTMT6plex [N-Term]; 1xIA-DTB [C16]	O75694	NU155_C102	3951.98	100.7	98	124.3	85.9	91.1	100
[R].YVENPSQVLNCER.[R]	1xTMT6plex [N-Term]; 1xIA-DTB [C11]	O75694	NU155_C1344	2289.19	89.9	99.3	112.5	102.6	91	104.6
[K].LHQEDQACATCLILACSTAACDR.[E]	3xCarbamidomethyl [C8; C11; C16]; 1xTMT6plex [N-Term]; 1xIA-DTB [C21]	O75694	NU155_C561	3345.6	58.6	98	118.4	108	125	91.9
[R].EITAIESSVPCQLLESVLQELK.[G]	1xTMT6plex [K22]; 1xTMT6plex [N-Term]; 1xIA-DTB [C11]	O75694	NU155_C704	3396.91	112	82.8	119.4	103.2	88.4	94.3
[R].DNAAVDGISLHLQDICPLLYSTDDAICSK.[A]	1xCarbamidomethyl [C16]; 1xTMT6plex [K29]; 1xTMT6plex [N-Term]; 1xIA-DTB [C27]	O75694	NU155_C874	4115.12	142	76.3	102.4	90.8	91.4	97
[K].CITDTLQELVNQSK.[A]	1xTMT6plex [K14]; 1xTMT6plex [N-Term]; 1xIA-DTB [C1]	O75694	NU155_C974	2559.42	82.1	89.6	114.3	103	106.2	104.8
[K].GYAICGLAWHPTCGR.[I]	1xCarbamidomethyl [C5]; 1xTMT6plex [N-Term]; 1xIA-DTB [C13]	O75717	WDHD1_C285	2400.23	168.8	82.2	84.9	82.5	89	92.5
[K].LPYCQIATEK.[G]	1xTMT6plex [K10]; 1xTMT6plex [N-Term]; 1xIA-DTB [C4]	O75717	WDHD1_C716	2133.21	111.3	94.3	101.4	98.5	93.3	101.1
[R].AGQTTYSGVIDCFRK.[I]	1xTMT6plex [K15]; 1xTMT6plex [N-Term]; 1xIA-DTB [C12]	O75746	S2512_C563	2613.42	95.6	96.9	89.7	117.9	106	93.8
[K].ICLLLEHLCHYFDEPK.[L]	1xCarbamidomethyl [C9]; 1xTMT6plex [K16]; 1xTMT6plex [N-Term]; 1xIA-DTB [C2]	O75818	RPP40_C291	2997.61	103.3	91.6	91.8	104.5	106.9	101.8
[R].VSFLIPECGILSEELK.[N]	1xTMT6plex [K16]; 1xTMT6plex [N-Term]; 1xIA-DTB [C8]	O75818	RPP40_C49	2744.57	95.3	94.7	102.8	105.9	99.3	102.1
[K].EDLNCQEEEDPMNKLK.[G]	2xTMT6plex [K14; K16]; 1xTMT6plex [N-Term]; 1xIA-DTB [C5]	O75821	EIF3G_C139	3131.63	90.1	85.1	91.7	121.1	116.9	95
[K].ITNSLTVLCSEK.[Q]	1xTMT6plex [K12]; 1xTMT6plex [N-Term]; 1xIA-DTB [C9]	O75822	EIF3J_C207	2275.31	87.3	86.1	110.7	115.4	103.8	96.7
[K].GAQVNAVNQNGCTPLHYAASK.[N]	1xTMT6plex [K21]; 1xTMT6plex [N-Term]; 1xIA-DTB [C12]	O75832	PSD10_C107	3110.66	123.3	83.8	109.5	100.8	80.3	102.3
[K].LTCEGAVAVAEFIAESPR.[L]	1xTMT6plex [N-Term]; 1xIA-DTB [C3]	O75864	PPR37_C375	2601.39	121.6	74.1	122.2	83.3	93.3	105.5
[K].SEGGFIWACK.[N]	1xTMT6plex [K10]; 1xTMT6plex [N-Term]; 1xIA-DTB [C9]	O75874	IDHC_C269	2065.13	80.9	105.3	108.5	103	89.3	113
[R].LPIAVNGSLIYGVCAGK.[K]	1xTMT6plex [K17]; 1xTMT6plex [N-Term]; 1xIA-DTB [C14]	O75879	GATB_C170	2642.55	107.1	99.7	106.3	98.6	84.8	103.5
[K].ENSSPSVTSANLDHTKPCWYWDKK.[D]	3xTMT6plex [K16; K23; K24]; 1xTMT6plex [N-Term]; 1xIA-DTB [C18]	O75909	CCNK_C23	4219.24	106.2	91.5	87.6	97	98.6	119
[K].VGVGTCGIADKPMTQYQDTSK.[Y]	1xOxidation [M13]; 2xTMT6plex [K11; K21]; 1xTMT6plex [N-Term]; 1xIA-DTB [C6]	O75940	SPF30_C214	3411.82	83.5	107.5	103.6	95.5	98.7	111.3
[K].VGVGTCGIADKPMTQYQDTSK.[Y]	2xTMT6plex [K11; K21]; 1xTMT6plex [N-Term]; 1xIA-DTB [C6]	O75940	SPF30_C214	3395.83	83.2	107.6	98.3	101.9	97.8	111.2
[K].SCAEWVSLSK.[A]	1xTMT6plex [K10]; 1xTMT6plex [N-Term]; 1xIA-DTB [C2]	O75947	ATP5H_C101	2077.15	89.7	106.9	83.7	111.1	117	91.6
[K].AVDALLTHCK.[S]	1xTMT6plex [K10]; 1xTMT6plex [N-Term]; 1xIA-DTB [C9]	O76021	RL1D1_C47	2038.19	103.2	94.7	111.8	107.3	89.1	94
[K].SVAWAPSGNLLATCSR.[D]	1xTMT6plex [N-Term]; 1xIA-DTB [C14]	O76071	CIAO1_C123	2371.28	75.8	86.6	100.1	102.7	119.8	114.9
[K].ALLAMYTNQAEQCR.[K]	1xTMT6plex [N-Term]; 1xIA-DTB [C13]	O76094	SRP72_C323	2350.22	99.8	93	86	109.1	112	100.2
[K].SPNIIFADADLDYAVEQAHQGVFFNQGQCCTAGSR.[I]	1xCarbamidomethyl [C29]; 1xTMT6plex [N-Term]; 1xIA-DTB [C30]	O94788	AL1A2_C320	4568.19	192.9	185.1	12.8	10.3	84.8	114.1
[R].LLCLLPDNELDSLEEK.[F]	1xTMT6plex [K16]; 1xTMT6plex [N-Term]; 1xIA-DTB [C3]	O94822	LTN1_C237	2811.56	129.8	77.8	106.4	89.4	115.5	81.2
[K].LVNLADCLCNEDLESR.[V]	1xCarbamidomethyl [C9]; 1xTMT6plex [N-Term]; 1xIA-DTB [C7]	O94822	LTN1_C751	2602.32	96.5	83.9	131.5	83.6	97.2	107.4
[K].EKTHLPDFLICK.[L]	2xTMT6plex [K2; K12]; 1xTMT6plex [N-Term]; 1xIA-DTB [C11]	O94822	LTN1_C869	2640.55	98	101.6	109.2	96.2	95.5	99.5
[R].CAEGYALYAQALTDQQQFGK.[A]	1xTMT6plex [K20]; 1xTMT6plex [N-Term]; 1xIA-DTB [C1]	O94826	TOM70_C475	3172.65	80	102.1	113.2	107.3	91.1	106.2
[R].TSLAVECGAVFPLLEQLLQQPSSPSCVR.[Q]	1xCarbamidomethyl [C7]; 1xTMT6plex [N-Term]; 1xIA-DTB [C26]	O94829	IPO13_C217	3768	74.9	126.9	112.5	92.3	91.5	102
[K].VLPVYMNCLLK.[N]	1xTMT6plex [K11]; 1xTMT6plex [N-Term]; 1xIA-DTB [C8]	O94855	SC24D_C848	2260.33	111.1	89.8	91.9	87.4	103.1	116.7
[R].CVPQIIAFLNSK.[I]	1xTMT6plex [K12]; 1xTMT6plex [N-Term]; 1xIA-DTB [C1]	O94874	UFL1_C708	2300.36	80	114.7	99.6	112.9	97.1	95.7
[K].EGLLSEAAAEEDIADPFFAYCK.[Q]	1xTMT6plex [K22]; 1xTMT6plex [N-Term]; 1xIA-DTB [C21]	O94880	PHF14_C495	3356.71	78.1	104	134.6	86.1	90.7	106.4
[R].MAIPSGGLTEICR.[K]	1xTMT6plex [N-Term]; 1xIA-DTB [C12]	O94885	SASH1_C1170	2086.14	95.5	102.8	93.1	90.6	103	115
[K].ALQECPNSGILWSEAIFLEARPQR.[R]	1xTMT6plex [N-Term]; 1xIA-DTB [C5]	O94906	PRP6_C807	3466.85	89.2	82.2	112.3	106.6	109.3	100.4
[K].FSPDLWGVSVCTVDGQR.[H]	1xTMT6plex [N-Term]; 1xIA-DTB [C11]	O94925	GLSK_C266	2604.34	72.3	69.8	108	100.4	127.1	122.4
[R].ELGCWAVEEMGVPVAAR.[A]	1xTMT6plex [N-Term]; 1xIA-DTB [C4]	O94927	HAUS5_C12	2555.33	132	76.5	131.4	110.5	63.5	86.1
[K].KVCLPGFTGLVNLGNTCFMNSVIQSLSNTR.[E]	1xCarbamidomethyl [C3]; 1xTMT6plex [K1]; 1xTMT6plex [N-Term]; 1xIA-DTB [C17]	O94966	UBP19_C506	4238.27	107.5	86.1	102.2	107.6	102.4	94.1
[R].AFPQLGGRPGPEGEGSLESQPPPLQTQACPESSCLR.[E]	1xCarbamidomethyl [C29]; 1xTMT6plex [N-Term]; 1xIA-DTB [C34]	O94992	HEXI1_C84	4516.26	127	112.4	86.8	86.1	96.5	91.2
[K].CLMEVTVDRNCLEVLPTK.[M]	1xCarbamidomethyl [C11]; 1xTMT6plex [K18]; 1xTMT6plex [N-Term]; 1xIA-DTB [C1]	O95071	UBR5_C2084	3087.68	64.7	117.4	115.8	94.4	77.1	130.6
[K].LPNLECIQNANK.[G]	1xTMT6plex [K12]; 1xTMT6plex [N-Term]; 1xIA-DTB [C6]	O95071	UBR5_C2314	2324.32	129.9	96.1	98	91.1	92.6	92.4
[R].SFYTAIAQAFLSNEKLPNLECIQNANK.[G]	2xTMT6plex [K15; K27]; 1xTMT6plex [N-Term]; 1xIA-DTB [C21]	O95071	UBR5_C2314	4224.31	84.5	105.1	112.3	95.9	81.9	120.3
[K].KLCIPEKTEILAVNVDSK.[G]	3xTMT6plex [K1; K7; K18]; 1xTMT6plex [N-Term]; 1xIA-DTB [C3]	O95071	UBR5_C739	3426.06	94.1	98.6	108.6	97.1	92.8	108.8
[K].KLLDQLTDIYLQLDCAR.[F]	1xTMT6plex [K1]; 1xTMT6plex [N-Term]; 1xIA-DTB [C15]	O95155	UBE4B_C1164	2988.7	97.3	87.4	113.6	94.3	96.9	110.6
[K].LLDQLTDIYLQLDCAR.[F]	1xTMT6plex [N-Term]; 1xIA-DTB [C14]	O95155	UBE4B_C1164	2631.44	76.9	105.1	117.8	109.4	99.9	90.9
[K].ALSAFLTCGNWK.[Q]	1xTMT6plex [K12]; 1xTMT6plex [N-Term]; 1xIA-DTB [C8]	O95163	ELP1_C1025	2278.28	88.9	90.4	97.8	103	110.4	109.5
[R].GDGQFFAVSVVCPETGAR.[K]	1xTMT6plex [N-Term]; 1xIA-DTB [C12]	O95163	ELP1_C213	2578.33	113.1	88.3	110.3	100.6	86.5	101.3
[K].LFEDELTLDNLTRPQLVALCK.[L]	1xTMT6plex [K21]; 1xTMT6plex [N-Term]; 1xIA-DTB [C20]	O95202	LETM1_C330	3398.91	94.2	87.4	88.4	125.3	117.1	87.7
[R].GLFSANDWQCK.[T]	1xTMT6plex [K11]; 1xTMT6plex [N-Term]; 1xIA-DTB [C10]	O95218	ZRAB2_C71	2236.19	110	100.6	92.5	96.3	104.1	96.6
[K].LLCSQLQVADFLQNILAQEDTAK.[G]	1xTMT6plex [K23]; 1xTMT6plex [N-Term]; 1xIA-DTB [C3]	O95229	ZWINT_C54	3528.95	82.9	114.2	92.9	68.1	114.1	127.7
[R].ALASNTSFFSGCSPIEEEAH.[-]	1xTMT6plex [N-Term]; 1xIA-DTB [C12]	O95239	KIF4A_C1224	2835.38	135	90.9	89.7	87.2	77.5	119.6
[R].GLLCLGNVISALGDDK.[K]	1xTMT6plex [K16]; 1xTMT6plex [N-Term]; 1xIA-DTB [C4]	O95239	KIF4A_C269	2555.46	111.6	90.9	106.8	82.3	101.6	106.8
[R].CSGLHVNSAR.[R]	1xTMT6plex [N-Term]; 1xIA-DTB [C1]	O95248	MTMR5_C553	1781.96	100.9	113.5	108.4	73.7	99.7	103.7
[R].VQDLFCSVGLNVNNPHFLIMQGR.[I]	1xTMT6plex [N-Term]; 1xIA-DTB [C6]	O95347	SMC2_C132	3339.77	74	93.6	117.5	106.5	102.8	105.5
[R].MKFDVFEDFISPTTAAQTLLFTACSK.[R]	1xOxidation [M1]; 2xTMT6plex [K2; K26]; 1xTMT6plex [N-Term]; 1xIA-DTB [C24]	O95373	IPO7_C401	4124.21	81.8	101.1	83.6	99.9	127.4	106.2
[R].MKFDVFEDFISPTTAAQTLLFTACSK.[R]	2xTMT6plex [K2; K26]; 1xTMT6plex [N-Term]; 1xIA-DTB [C24]	O95373	IPO7_C401	4108.21	101.6	70.7	83.6	114.2	130.4	99.5
[K].GLGCQTLGPHNPTPPPSLDMFAEELAEEELETPTPTQR.[G]	1xTMT6plex [N-Term]; 1xIA-DTB [C4]	O95400	CD2B2_C234	4841.4	124.1	74.6	102.9	96.3	92.5	109.6
[K].GLGCQTLGPHNPTPPPSLDMFAEELAEEELETPTPTQR.[G]	1xOxidation [M20]; 1xTMT6plex [N-Term]; 1xIA-DTB [C4]	O95400	CD2B2_C234	4857.39	135.4	90	102.8	92.4	80.1	99.2
[K].AAAECFVQSYWEQYKFPVVITR.[S]	1xTMT6plex [K15]; 1xTMT6plex [N-Term]; 1xIA-DTB [C5]	O95455	TGDS_C175	3602.92	112.8	92.2	108.4	89.7	80.8	116
[K].AAAECFVQSYWEQYK.[F]	1xTMT6plex [K15]; 1xTMT6plex [N-Term]; 1xIA-DTB [C5]	O95455	TGDS_C175	2790.43	139.6	93.1	99.1	86.9	85.3	96
[K].GCDNNFIEDVLGYTNFASIPQK.[M]	1xTMT6plex [K22]; 1xTMT6plex [N-Term]; 1xIA-DTB [C2]	O95487	SC24B_C1175	3412.76	74.6	102.7	107.5	117.4	111.9	85.8
[R].TDFQQGCAK.[T]	1xTMT6plex [K9]; 1xTMT6plex [N-Term]; 1xIA-DTB [C7]	O95571	ETHE1_C170	1965.06	72.4	114.5	111.8	102.2	89	110.2
[R].WLCTGDIGEFEPDGCLK.[I]	1xCarbamidomethyl [C15]; 1xTMT6plex [K17]; 1xTMT6plex [N-Term]; 1xIA-DTB [C3]	O95573	ACSL3_C561	2907.48	95.7	111.4	82.2	99	114.1	97.5
[K].GTWEELCNSCEMENEVLK.[V]	1xCarbamidomethyl [C7]; 1xTMT6plex [K18]; 1xTMT6plex [N-Term]; 1xIA-DTB [C10]	O95573	ACSL3_C652	3138.53	103.8	104.1	115.6	86.3	88.3	102
[R].SVICPDMYINTNEIGIPMVFATK.[L]	1xTMT6plex [K23]; 1xTMT6plex [N-Term]; 1xIA-DTB [C4]	O95602	RPA1_C446	3523.88	68.4	80.5	115.4	94.8	107.5	133.4
[R].DAGSRDEKAEAGEAGQATAEAECHR.[T]	1xTMT6plex [K8]; 1xTMT6plex [N-Term]; 1xIA-DTB [C23]	O95671	ASML_C274	3526.73	84.2	101.8	110.3	87.9	101	114.7
[K].AEAGEAGQATAEAECHR.[T]	1xTMT6plex [N-Term]; 1xIA-DTB [C15]	O95671	ASML_C274	2439.19	113.9	82.7	109.1	95.2	94.6	104.5
[R].FLFNELRPAVCNDLSIMSK.[F]	1xTMT6plex [K19]; 1xTMT6plex [N-Term]; 1xIA-DTB [C11]	O95714	HERC2_C1525	3164.74	81.9	104.7	122.5	94.6	82.4	114
[K].LMSANASDLPLNIECFMNDLDVSSK.[M]	1xTMT6plex [K25]; 1xTMT6plex [N-Term]; 1xIA-DTB [C15]	O95757	HS74L_C290	3694.89	82.8	95.3	125.3	108.9	77.2	110.5
[R].AQFEQLCASLLAR.[V]	1xTMT6plex [N-Term]; 1xIA-DTB [C7]	O95757	HS74L_C310	2188.21	111.6	89.2	87.5	116.5	112.7	82.5
[K].CHAEHTPEEEIDHTGAK.[T]	1xTMT6plex [K17]; 1xTMT6plex [N-Term]; 1xIA-DTB [C1]	O95757	HS74L_C540	2871.45	34.3	119.5	108.4	115.4	136.7	85.7
[K].IPCDVTEAEIISLGLPFGK.[V]	1xTMT6plex [K19]; 1xTMT6plex [N-Term]; 1xIA-DTB [C3]	O95758	PTBP3_C68	2969.68	103.4	90	114.7	95.3	102.1	94.5
[R].KIPCDVTEAEIISLGLPFGK.[V]	2xTMT6plex [K1; K20]; 1xTMT6plex [N-Term]; 1xIA-DTB [C4]	O95758	PTBP3_C68	3326.94	98.6	92.2	108.9	104.5	90.9	104.8
[R].QFGVTEWCVNGSPIETLSEWIK.[H]	1xTMT6plex [K22]; 1xTMT6plex [N-Term]; 1xIA-DTB [C8]	O95785	WIZ_C1429	3490.84	96.1	120	122.1	80.8	77.5	103.6
[R].LSEAACEDEDSASEGLGELFLDGLSTENPHGAR.[L]	1xTMT6plex [N-Term]; 1xIA-DTB [C6]	O95801	TTC4_C238	4157.98	107.4	81.4	122.5	76.1	84.3	128.2
[K].YCPDNLEVYFEDEDRAELYR.[V]	1xTMT6plex [N-Term]; 1xIA-DTB [C2]	O95801	TTC4_C321	3277.57	94.9	71.8	111.8	98.1	105.2	118.2
[K].ALTPAFLVCVGSSPFCK.[N]	1xCarbamidomethyl [C9]; 1xTMT6plex [K17]; 1xTMT6plex [N-Term]; 1xIA-DTB [C16]	O95801	TTC4_C374	2764.53	100.3	85.5	93.5	91.9	102.3	126.5
[R].ENPDLACLQSIIFDEERSPEEQAK.[T]	1xTMT6plex [K24]; 1xTMT6plex [N-Term]; 1xIA-DTB [C7]	O95801	TTC4_C63	3728.92	83.5	88.1	114.6	100	92.7	121.1
[R].GMPETTQPDKQCGQVAAAAAAQPPASHGPER.[S]	1xTMT6plex [K10]; 1xTMT6plex [N-Term]; 1xIA-DTB [C12]	O95817	BAG3_C151	4069.07	105.2	96.9	84.9	99.7	103.7	109.7
[K].QCGQVAAAAAAQPPASHGPER.[S]	1xTMT6plex [N-Term]; 1xIA-DTB [C2]	O95817	BAG3_C151	2755.43	108.6	102.7	75.5	113	115.2	85
[R].LLQISPSSGTTVTSVVGFSCDGMRPEAIR.[Q]	1xOxidation [M23]; 1xTMT6plex [N-Term]; 1xIA-DTB [C20]	O95819	M4K4_C883	3762.97	86	98.2	104	103	95.1	113.7
[R].LLQISPSSGTTVTSVVGFSCDGMRPEAIR.[Q]	1xTMT6plex [N-Term]; 1xIA-DTB [C20]	O95819	M4K4_C883	3746.98	87.4	96	124.5	94.5	86.1	111.6
[R].SNIWVAGDAACFYDIK.[L]	1xTMT6plex [K16]; 1xTMT6plex [N-Term]; 1xIA-DTB [C11]	O95831	AIFM1_C441	2740.45	103.3	110.6	69.9	97.1	125.6	93.5
[K].ASAYVFASPGCK.[K]	1xTMT6plex [K12]; 1xTMT6plex [N-Term]; 1xIA-DTB [C11]	O95861	BPNT1_C243	2168.19	115.7	83.7	72.1	91.9	113.7	122.9
[K].TCATDLQTK.[A]	1xTMT6plex [K9]; 1xTMT6plex [N-Term]; 1xIA-DTB [C2]	O95861	BPNT1_C42	1948.09	79.8	104.6	101.1	106.7	101.2	106.7
[K].SYMAQMDQELAHTCISK.[S]	1xTMT6plex [K17]; 1xTMT6plex [N-Term]; 1xIA-DTB [C14]	O95905	ECD_C557	2923.49	103.6	100.5	95.6	86.2	94.5	119.7
[K].NPGVWLNTTQPLCK.[A]	1xTMT6plex [K14]; 1xTMT6plex [N-Term]; 1xIA-DTB [C13]	O95983	MBD3_C215	2538.43	78.5	103.4	108.8	115.9	94.3	99.2
[R].TPGAATASASGAAEDGACGCLPNPGTFEECHR.[K]	2xCarbamidomethyl [C20; C30]; 1xTMT6plex [N-Term]; 1xIA-DTB [C18]	O96008	TOM40_C74	3900.79	92.4	100.7	111.9	91.4	90.5	113
[R].TPGAATASASGAAEDGACGCLPNPGTFEECHRK.[C]	2xCarbamidomethyl [C20; C30]; 1xTMT6plex [K33]; 1xTMT6plex [N-Term]; 1xIA-DTB [C18]	O96008	TOM40_C74	4258.05	74.2	102.4	133.2	89.8	85.1	115.4
[R].LLMEQESSACSR.[R]	1xOxidation [M3]; 1xTMT6plex [N-Term]; 1xIA-DTB [C10]	O96011	PX11B_C153	2108.07	102.8	100.6	79.3	115.2	110.7	91.4
[R].LLMEQESSACSR.[R]	1xTMT6plex [N-Term]; 1xIA-DTB [C10]	O96011	PX11B_C153	2092.07	113.6	101.9	94.1	109.7	95.6	85.1
[R].RPKPLVDPACITSIQPGAPK.[T]	2xTMT6plex [K3; K20]; 1xTMT6plex [N-Term]; 1xIA-DTB [C10]	O96013	PAK4_C58	3284.95	97.3	97.1	99.6	112.4	101	92.6
[R].TLCGTPTYLAPEVLVSVGTAGYNR.[A]	1xTMT6plex [N-Term]; 1xIA-DTB [C3]	O96017	CHK2_C385	3220.72	119.7	103.8	98	78.2	76.4	123.8
[R].EQLGFCVEDGIICSLLR.[G]	1xCarbamidomethyl [C13]; 1xTMT6plex [N-Term]; 1xIA-DTB [C6]	O96018	APBA3_C500	2690.42	115.5	125.4	90.5	95.6	80.3	92.7
[R].EKLTELMFEHYNIPAFFLCK.[T]	2xTMT6plex [K2; K20]; 1xTMT6plex [N-Term]; 1xIA-DTB [C19]	O96019	ACL6A_C152	3670.01	96.2	99.9	88	112.2	108.7	95.1
[K].SPLAGDFITMQCR.[E]	1xTMT6plex [N-Term]; 1xIA-DTB [C12]	O96019	ACL6A_C206	2177.14	101.7	125.1	83.9	102.4	94.9	92.1
[K].DDVFLSVPCILGQNGISDLVK.[V]	1xTMT6plex [K21]; 1xTMT6plex [N-Term]; 1xIA-DTB [C9]	P00338	LDHA_C293	3199.78	120.2	71.5	75.6	121.7	142.5	68.5
[K].GLYGIKDDVFLSVPCILGQNGISDLVK.[V]	2xTMT6plex [K6; K27]; 1xTMT6plex [N-Term]; 1xIA-DTB [C15]	P00338	LDHA_C293	4060.31	131.9	85.1	94.1	104.8	108.7	75.3
[K].ITVVGVGAVGMACAISILMK.[D]	1xTMT6plex [K20]; 1xTMT6plex [N-Term]; 1xIA-DTB [C13]	P00338	LDHA_C35	2900.69	137.9	80.7	65.4	137.5	126.2	52.2
[K].VLMVEEPSMNLEWLYGCPPPYHTFEEPVYMK.[S]	1xTMT6plex [K31]; 1xTMT6plex [N-Term]; 1xIA-DTB [C17]	P00395	COX1_C498	4696.34	113.1	68.4	126.9	117.8	95.4	78.4
[K].HRPQVAIICGSGLGGLTDK.[L]	1xTMT6plex [K19]; 1xTMT6plex [N-Term]; 1xIA-DTB [C9]	P00491	PNPH_C31	2889.65	93.6	108.8	96	86.5	106.4	108.8
[K].SYCNDQSTGDIK.[V]	1xTMT6plex [K12]; 1xTMT6plex [N-Term]; 1xIA-DTB [C3]	P00492	HPRT_C106	2298.18	95.6	93.9	90.7	113.8	110.3	95.7
[R].LKSYCNDQSTGDIK.[V]	2xTMT6plex [K2; K14]; 1xTMT6plex [N-Term]; 1xIA-DTB [C5]	P00492	HPRT_C106	2768.52	76.6	106	116.5	100.5	93.6	106.7
[R].SPGVVISDDEPGYDLDLFCIPNHYAEDLER.[V]	1xTMT6plex [N-Term]; 1xIA-DTB [C19]	P00492	HPRT_C23	4117.01	101.1	86	110.8	109.3	97.9	94.9
[K].ACANPAAGSVILLENLR.[F]	1xTMT6plex [N-Term]; 1xIA-DTB [C2]	P00558	PGK1_C108	2450.38	111.6	79.9	89.9	114.7	133.2	70.7
[K].TGQATVASGIPAGWMGLDCGPESSKK.[Y]	2xTMT6plex [K25; K26]; 1xTMT6plex [N-Term]; 1xIA-DTB [C19]	P00558	PGK1_C316	3745	62.8	104.8	111.3	118.6	102.9	99.6
[K].LQFWAVTAENEPSAGLLSGYPFQCLGFTPEHQR.[D]	1xTMT6plex [N-Term]; 1xIA-DTB [C24]	P04062	GBA1_C287	4432.24	104.5	105.2	113.2	94.1	82.5	100.6
[R].YASICQQNGIVPIVEPEILPDGDHDLKR.[C]	1xTMT6plex [K27]; 1xTMT6plex [N-Term]; 1xIA-DTB [C5]	P04075	ALDOA_C178	4087.21	118.6	120.5	75.2	100.3	104.5	80.9
[R].CQYVTEK.[V]	1xTMT6plex [K7]; 1xTMT6plex [N-Term]; 1xIA-DTB [C1]	P04075	ALDOA_C202	1838.02	94.8	100.7	92.1	108.2	109.3	94.8
[R].ALANSLACQGK.[Y]	1xTMT6plex [K11]; 1xTMT6plex [N-Term]; 1xIA-DTB [C8]	P04075	ALDOA_C339	2043.18	119.6	82.7	80.5	124.5	119.8	73
[R].VNPCIGGVILFHETLYQK.[A]	1xTMT6plex [K18]; 1xTMT6plex [N-Term]; 1xIA-DTB [C4]	P04075	ALDOA_C73	2998.7	221.1	51.5	73.2	91.3	87.5	75.4
[K].MYGISLCQAILDETKGDYEK.[I]	2xTMT6plex [K15; K20]; 1xTMT6plex [N-Term]; 1xIA-DTB [C7]	P04083	ANXA1_C324	3473.86	66.5	99.9	125.2	103.4	87.5	117.5
[K].VLPMNTGVEAGETACK.[L]	1xTMT6plex [K16]; 1xTMT6plex [N-Term]; 1xIA-DTB [C15]	P04181	OAT_C150	2587.4	108.4	89	82.4	110.1	113	97.1
[K].ASGQPAGPDNKENCPVPGKPGEAVAAR.[K]	2xTMT6plex [K11; K19]; 1xTMT6plex [N-Term]; 1xIA-DTB [C14]	P04183	KITH_C206	3814.06	111	109.9	85.8	90.2	102.6	100.6
[R].VPTANVSVVDLTCR.[L]	1xTMT6plex [N-Term]; 1xIA-DTB [C13]	P04406	G3P_C247	2212.23	115.1	79.3	73	129.5	132.1	70.9
[R].SGTICSSELPGAFEAAGFHLNEHLYNMIIR.[R]	1xTMT6plex [N-Term]; 1xIA-DTB [C5]	P04632	CPNS1_C190	4016.04	94	104.5	122.1	94.6	69.2	115.7
[R].CSDSDGLAPPQHLIR.[V]	1xTMT6plex [N-Term]; 1xIA-DTB [C1]	P04637	P53_C182	2347.24	93.4	95.3	96.3	132.4	99.1	83.4
[R].DLPLMALPPCHALCQFYVVNSELSCQLYQR.[S]	2xCarbamidomethyl [C14; C25]; 1xTMT6plex [N-Term]; 1xIA-DTB [C10]	P04818	TYSY_C195	4304.17	158.6	114.4	73.7	50.5	94.5	108.3
[K].VACITEQVLTLVNK.[R]	1xTMT6plex [K14]; 1xTMT6plex [N-Term]; 1xIA-DTB [C3]	P04843	RPN1_C477	2498.48	112.4	95.8	91.8	112.2	106.8	81.1
[K].NLEAVETLGSTSTICSDK.[T]	1xTMT6plex [K18]; 1xTMT6plex [N-Term]; 1xIA-DTB [C15]	P05023	AT1A1_C374	2835.52	74.6	105.1	96.9	95.7	108.9	118.8
[K].CIELCCGSVK.[E]	2xCarbamidomethyl [C1; C5]; 1xTMT6plex [K10]; 1xTMT6plex [N-Term]; 1xIA-DTB [C6]	P05023	AT1A1_C464	2136.14	70.7	105.8	106.1	108.8	96.6	112
[R].HEPVGVCGQIIPWNFPLLMQAWK.[L]	1xTMT6plex [K23]; 1xTMT6plex [N-Term]; 1xIA-DTB [C7]	P05091	ALDH2_C179	3630.98	85.8	102.2	83	111.9	117	100.2
[R].KGTDIMYTGTLDCWR.[K]	1xTMT6plex [K1]; 1xTMT6plex [N-Term]; 1xIA-DTB [C13]	P05141	ADT2_C257	2727.44	98.5	92.3	83.6	113	114.8	97.8
[R].KGTDIMYTGTLDCWR.[K]	1xOxidation [M6]; 1xTMT6plex [K1]; 1xTMT6plex [N-Term]; 1xIA-DTB [C13]	P05141	ADT2_C257	2743.43	96.6	98.9	84.6	111.1	113	95.7
[K].GTDIMYTGTLDCWR.[K]	1xOxidation [M5]; 1xTMT6plex [N-Term]; 1xIA-DTB [C12]	P05141	ADT2_C257	2386.17	103.7	85.6	83.1	121.6	112.7	93.3
[K].ALANVNIGSLICNVGAGGPAPAAGAAPAGGPAPSTAAAPAEEK.[K]	1xTMT6plex [K43]; 1xTMT6plex [N-Term]; 1xIA-DTB [C12]	P05386	RLA1_C61	4719.53	92.1	88.1	117.5	96.9	94.8	110.5
[K].CFIVGADNVGSK.[Q]	1xTMT6plex [K12]; 1xTMT6plex [N-Term]; 1xIA-DTB [C1]	P05388	RLA0_C27	2177.22	81.2	98.8	103.7	111	107.8	97.4
[K].FGANAILGVSLAVCK.[A]	1xTMT6plex [K15]; 1xTMT6plex [N-Term]; 1xIA-DTB [C14]	P06733	ENOA_C119	2430.43	86	91.7	85.5	135.8	124.3	76.8
[K].VNQIGSVTESIQACK.[L]	1xTMT6plex [K15]; 1xTMT6plex [N-Term]; 1xIA-DTB [C14]	P06733	ENOA_C357	2544.42	89.1	94.3	92.7	127	116	81
[R].RWLLLCNPGLAELIAEK.[I]	1xTMT6plex [K17]; 1xTMT6plex [N-Term]; 1xIA-DTB [C6]	P06737	PYGL_C496	2906.71	95.4	102.6	89.9	111.9	110.6	89.6
[R].WLLLCNPGLAELIAEK.[I]	1xTMT6plex [K16]; 1xTMT6plex [N-Term]; 1xIA-DTB [C5]	P06737	PYGL_C496	2750.6	112.2	95.5	97.7	121.7	94	78.9
[K].CGSGPVHISGQHLVAVEEDAESEDEEEEDVK.[L]	1xTMT6plex [K31]; 1xTMT6plex [N-Term]; 1xIA-DTB [C1]	P06748	NPM_C104	4291.07	99.7	111.4	115.9	84.9	102.6	85.5
[R].FTPPLEDSCFHYGFNSNYLK.[K]	1xTMT6plex [K20]; 1xTMT6plex [N-Term]; 1xIA-DTB [C9]	P07099	HYEP_C80	3346.7	127.2	86.5	83.5	114.8	98	90
[K].ITVVGVGQVGMACAISILGK.[S]	1xTMT6plex [K20]; 1xTMT6plex [N-Term]; 1xIA-DTB [C13]	P07195	LDHB_C36	2883.69	100.7	95.2	80	118.2	121.7	84.2
[K].GLGTDEDSLIEIICSR.[T]	1xTMT6plex [N-Term]; 1xIA-DTB [C14]	P07355	ANXA2_C133	2459.3	121.4	76.5	68.2	138.6	121.3	74.1
[R].KEAESCDCLQGFQLTHSLGGGTGSGMGTLLISK.[I]	1xCarbamidomethyl [C8]; 1xOxidation [M26]; 2xTMT6plex [K1; K33]; 1xTMT6plex [N-Term]; 1xIA-DTB [C6]	P07437	TBB5_C127	4595.39	109.1	83.5	100	91.6	93.3	122.5
[K].EAESCDCLQGFQLTHSLGGGTGSGMGTLLISK.[I]	1xCarbamidomethyl [C7]; 1xTMT6plex [K32]; 1xTMT6plex [N-Term]; 1xIA-DTB [C5]	P07437	TBB5_C127	4222.13	119.5	78.5	110.4	85.5	90.7	115.5
[R].KEAESCDCLQGFQLTHSLGGGTGSGMGTLLISK.[I]	1xCarbamidomethyl [C8]; 2xTMT6plex [K1; K33]; 1xTMT6plex [N-Term]; 1xIA-DTB [C6]	P07437	TBB5_C127	4579.39	107.7	81.5	110.8	95	91.3	113.7
[R].LQAEVLECVSLVELTSLK.[G]	1xTMT6plex [K18]; 1xTMT6plex [N-Term]; 1xIA-DTB [C8]	P07741	APT_C153	2941.7	89.4	109.7	96.4	102.7	112.4	89.4
[R].GFLFGPSLAQELGLGCVLIR.[K]	1xTMT6plex [N-Term]; 1xIA-DTB [C16]	P07741	APT_C83	2828.61	157.8	107.2	67.6	85.3	106.3	75.8
[K].LGVENCYFPMFVSQSALEK.[E]	1xOxidation [M10]; 1xTMT6plex [K19]; 1xTMT6plex [N-Term]; 1xIA-DTB [C6]	P07814	SYEP_C1076	3145.65	104.3	95	98.8	105.2	100.9	95.9
[K].LGVENCYFPMFVSQSALEK.[E]	1xTMT6plex [K19]; 1xTMT6plex [N-Term]; 1xIA-DTB [C6]	P07814	SYEP_C1076	3129.65	93	99.2	107	102	98	100.9
[K].IVQIPFCGEIDCEDWIKK.[T]	1xCarbamidomethyl [C12]; 2xTMT6plex [K17; K18]; 1xTMT6plex [N-Term]; 1xIA-DTB [C7]	P07814	SYEP_C1448	3389.86	83	97.1	115.8	99.9	97.3	107
[K].IVQIPFCGEIDCEDWIK.[K]	1xCarbamidomethyl [C7]; 1xTMT6plex [K17]; 1xTMT6plex [N-Term]; 1xIA-DTB [C12]	P07814	SYEP_C1453	3032.6	104.8	89.4	116.7	86.1	94.2	108.9
[K].SLCIPFKPLCELQPGAK.[C]	1xCarbamidomethyl [C3]; 2xTMT6plex [K7; K17]; 1xTMT6plex [N-Term]; 1xIA-DTB [C10]	P07814	SYEP_C1487	3097.79	81.1	98	110.5	105.3	97.3	107.7
[K].YNVYPTYDFACPIVDSIEGVTHALR.[T]	1xTMT6plex [N-Term]; 1xIA-DTB [C11]	P07814	SYEP_C381	3581.83	110.6	77.7	104.5	91.9	91.7	123.6
[R].RGFFICDQPYEPVSPYSCK.[E]	1xCarbamidomethyl [C6]; 1xTMT6plex [K19]; 1xTMT6plex [N-Term]; 1xIA-DTB [C18]	P07814	SYEP_C692	3260.66	78.5	102.3	101.6	97.4	100.8	119.4
[R].GFFICDQPYEPVSPYSCK.[E]	1xCarbamidomethyl [C5]; 1xTMT6plex [K18]; 1xTMT6plex [N-Term]; 1xIA-DTB [C17]	P07814	SYEP_C692	3104.56	122.5	92.2	99.7	91.8	90.3	103.5
[K].INEAVECLLSLK.[A]	1xTMT6plex [K12]; 1xTMT6plex [N-Term]; 1xIA-DTB [C7]	P07814	SYEP_C856	2299.35	103.4	81.4	92	125.2	119	79
[R].VFIMDNCEELIPEYLNFIR.[G]	1xTMT6plex [N-Term]; 1xIA-DTB [C7]	P07900	HS90A_C374	3096.61	131.9	64.7	93	109.7	107.6	93.1
[K].HGLEVIYMIEPIDEYCVQQLK.[E]	1xTMT6plex [K21]; 1xTMT6plex [N-Term]; 1xIA-DTB [C16]	P07900	HS90A_C529	3487.87	129.8	88.5	81.8	110.6	114.2	75.1
[R].KHGLEVIYMIEPIDEYCVQQLK.[E]	2xTMT6plex [K1; K22]; 1xTMT6plex [N-Term]; 1xIA-DTB [C17]	P07900	HS90A_C529	3845.13	26.4	102.9	120.3	134.8	181.2	34.5
[K].LGQGCFGEVWMGTWNGTTK.[V]	1xOxidation [M11]; 1xTMT6plex [K19]; 1xTMT6plex [N-Term]; 1xIA-DTB [C5]	P07947	YES_C287	3055.55	100.5	98.4	97.3	99.1	94.2	110.6
[K].LGQGCFGEVWMGTWNGTTK.[V]	1xTMT6plex [K19]; 1xTMT6plex [N-Term]; 1xIA-DTB [C5]	P07947	YES_C287	3039.56	96.2	100.9	117.7	92.9	86.3	106
[R].ITFPCISDMIK.[H]	1xTMT6plex [K11]; 1xTMT6plex [N-Term]; 1xIA-DTB [C5]	P07948	LYN_C203	2235.26	88	96.3	114.8	96.2	91.4	113.3
[K].WTAPEAINFGCFTIK.[S]	1xTMT6plex [K15]; 1xTMT6plex [N-Term]; 1xIA-DTB [C11]	P07948	LYN_C419	2665.46	100.4	93.7	102.9	104.2	97.5	101.4
[R].MGVEAVMALLEGTPDTPACVVSLSGNQAVR.[L]	1xTMT6plex [N-Term]; 1xIA-DTB [C19]	P08237	PFKAM_C334	3753.95	86	56.4	101.3	115.5	116	124.9
[R].VFIMDSCDELIPEYLNFIR.[G]	1xTMT6plex [N-Term]; 1xIA-DTB [C7]	P08238	HS90B_C366	3055.58	135.1	76.9	76.9	99.5	114.7	96.9
[R].RVFIMDSCDELIPEYLNFIR.[G]	1xTMT6plex [N-Term]; 1xIA-DTB [C8]	P08238	HS90B_C366	3211.68	85.3	86.1	101.2	121.5	99.2	106.8
[K].RGFEVVYMTEPIDEYCVQQLK.[E]	1xTMT6plex [K21]; 1xTMT6plex [N-Term]; 1xIA-DTB [C16]	P08238	HS90B_C521	3514.85	99.8	74.5	95.2	117.4	118.2	94.9
[R].GFEVVYMTEPIDEYCVQQLK.[E]	1xOxidation [M7]; 1xTMT6plex [K20]; 1xTMT6plex [N-Term]; 1xIA-DTB [C15]	P08238	HS90B_C521	3374.74	135.1	72.3	83.8	116.3	111.8	80.7
[R].GFEVVYMTEPIDEYCVQQLK.[E]	1xTMT6plex [K20]; 1xTMT6plex [N-Term]; 1xIA-DTB [C15]	P08238	HS90B_C521	3358.75	136.2	75	83.9	115.6	112.8	76.6
[K].GGLVLWCFQGVSDSCTGPVNALIR.[S]	1xCarbamidomethyl [C15]; 1xTMT6plex [N-Term]; 1xIA-DTB [C7]	P08240	SRPRA_C17	3287.72	119	85.5	105.4	108.8	87.4	93.7
[R].VWELGGCANK.[E]	1xTMT6plex [K10]; 1xTMT6plex [N-Term]; 1xIA-DTB [C7]	P08240	SRPRA_C253	2044.14	93.8	107.2	95.2	105.2	104.4	94.2
[R].IGCLLSGGLDSSLVAATLLK.[Q]	1xTMT6plex [K20]; 1xTMT6plex [N-Term]; 1xIA-DTB [C3]	P08243	ASNS_C255	2898.71	91.2	97.8	102.2	102.3	110.7	95.8
[K].HHNQPYCGIAPYIR.[E]	1xTMT6plex [N-Term]; 1xIA-DTB [C7]	P08621	RU17_C39	2407.27	90.3	127.3	79.2	71.2	138.1	93.9
[R].QVQSLTCEVDALK.[G]	1xTMT6plex [K13]; 1xTMT6plex [N-Term]; 1xIA-DTB [C7]	P08670	VIME_C328	2401.35	89.2	91.6	94.3	120.9	111.7	92.2
[R].QVQSLTCEVDALKGTNESLER.[Q]	1xTMT6plex [K13]; 1xTMT6plex [N-Term]; 1xIA-DTB [C7]	P08670	VIME_C328	3287.77	84.1	90.6	102.2	128.4	99.7	95
[R].VCEEIAIIPSKK.[L]	2xTMT6plex [K11; K12]; 1xTMT6plex [N-Term]; 1xIA-DTB [C2]	P08708	RS17_C35	2526.53	108.6	96.7	78.8	115.2	121.6	79.1
[R].VCEEIAIIPSK.[K]	1xTMT6plex [K11]; 1xTMT6plex [N-Term]; 1xIA-DTB [C2]	P08708	RS17_C35	2169.27	109.4	92.6	83.8	111.9	119.9	82.3
[R].YVDIAIPCNNK.[G]	1xTMT6plex [K11]; 1xTMT6plex [N-Term]; 1xIA-DTB [C8]	P08865	RSSA_C163	2217.25	96.9	89.6	83.3	110.1	118.9	101.1
[K].LCPLKDEPWPIHPWEPGSFR.[V]	1xTMT6plex [K5]; 1xTMT6plex [N-Term]; 1xIA-DTB [C2]	P09001	RM03_C78	3371.81	111.4	114.9	90.2	86.9	86.1	110.4
[K].ASCLYGQLPK.[F]	1xTMT6plex [K10]; 1xTMT6plex [N-Term]; 1xIA-DTB [C3]	P09211	GSTP1_C48	2047.18	119.8	95.1	96.1	110.1	93.6	85.4
[K].RPPSAFFLFCSEYRPK.[I]	1xTMT6plex [K16]; 1xTMT6plex [N-Term]; 1xIA-DTB [C10]	P09429	HMGB1_C106	2912.6	117.6	77.9	60.5	144	138.2	61.9
[K].MSSYAFFVQTCR.[E]	1xTMT6plex [N-Term]; 1xIA-DTB [C11]	P09429	HMGB1_C23	2178.1	80.5	99.2	93.1	106.2	115.7	105.4
[K].DKPELQFPFLQDEDTVATLLECK.[T]	2xTMT6plex [K2; K23]; 1xTMT6plex [N-Term]; 1xIA-DTB [C22]	P09543	CN37_C49	3876.11	93.4	95.2	89.3	94.8	119	108.3
[R].VLGAHILGPGAGEMVNEAALALEYGASCEDIAR.[V]	1xTMT6plex [N-Term]; 1xIA-DTB [C28]	P09622	DLDH_C477	4036.08	94.1	71	121.6	107.6	103.1	102.5
[R].SHFEQWGTLTDCVVMR.[D]	1xTMT6plex [N-Term]; 1xIA-DTB [C12]	P09651	ROA1_C43	2647.33	35.2	108.4	76.4	150.1	187.3	42.6
[R].VADGMVFGALLPCEECSGQLVFK.[S]	1xCarbamidomethyl [C16]; 1xTMT6plex [K23]; 1xTMT6plex [N-Term]; 1xIA-DTB [C13]	P09874	PARP1_C295	3437.8	70.9	84.3	128	108.9	112.8	95.1
[R].YIFDAECALEK.[L]	1xTMT6plex [K11]; 1xTMT6plex [N-Term]; 1xIA-DTB [C7]	P09884	DPOLA_C1403	2269.23	88.3	94.2	111.6	95.5	96.2	114.2
[K].SPQLLNQPVSWCK.[V]	1xTMT6plex [K13]; 1xTMT6plex [N-Term]; 1xIA-DTB [C12]	P09884	DPOLA_C514	2467.39	81.6	112.2	97	96.1	107.8	105.3
[K].NEAIQAAHDAVAQEGQCR.[V]	1xTMT6plex [N-Term]; 1xIA-DTB [C17]	P09936	UCHL1_C152	2649.34	82.1	97	104.6	112.7	103.1	100.4
[K].CFEKNEAIQAAHDAVAQEGQCR.[V]	1xCarbamidomethyl [C1]; 1xTMT6plex [K4]; 1xTMT6plex [N-Term]; 1xIA-DTB [C21]	P09936	UCHL1_C152	3442.74	61.9	104.8	120.7	107	99.9	105.7
[K].QTIGNSCGTIGLIHAVANNQDKLGFEDGSVLK.[Q]	2xTMT6plex [K22; K32]; 1xTMT6plex [N-Term]; 1xIA-DTB [C7]	P09936	UCHL1_C90	4496.45	92	75.6	110.3	95.7	103.3	123
[K].DQNVLSPVNCWNLLLNQVK.[WR]	1xTMT6plex [K19]; 1xTMT6plex [N-Term]; 1xIA-DTB [C10]	P0DJJ0	SRG2C_C98	3164.77	93.6	108.6	96.6	89.6	102.2	109.3
[K].AAAIGIDLGTTYSCVGVFQHGK.[V]	1xTMT6plex [K22]; 1xTMT6plex [N-Term]; 1xIA-DTB [C14]	P0DMV9	HS71B_C17	3175.73	140.5	71.5	75.6	108	117.4	87
[K].CQEVISWLDANTLAEKDEFEHK.[R]	2xTMT6plex [K16; K22]; 1xTMT6plex [N-Term]; 1xIA-DTB [C1]	P0DMV9	HS71B_C574	3802.01	99.4	78.1	73.5	140.9	134.4	73.7
[K].ELEQVCNPIISGLYQGAGGPGPGGFGAQGPK.[G]	1xTMT6plex [K31]; 1xTMT6plex [N-Term]; 1xIA-DTB [C6]	P0DMV9	HS71B_C603	3966.09	116.4	70.2	77.8	137.6	119.6	78.4
[R].LIEDGRGCEVIQEIK.[S]	1xTMT6plex [K15]; 1xTMT6plex [N-Term]; 1xIA-DTB [C8]	P10155	RO60_C71	2669.51	81	87.9	121.9	93.5	95.9	119.8
[R].GCEVIQEIK.[S]	1xTMT6plex [K9]; 1xTMT6plex [N-Term]; 1xIA-DTB [C2]	P10155	RO60_C71	1986.15	123.1	87.3	94.7	105	103.2	86.7
[R].VALSPVTENSTSLSFLDSCNSLTPK.[S]	1xTMT6plex [K25]; 1xTMT6plex [N-Term]; 1xIA-DTB [C19]	P10244	MYBB_C436	3577.92	96.2	112	87.9	74.2	105.2	124.6
[R].AYLEGTCVEWLR.[R]	1xTMT6plex [N-Term]; 1xIA-DTB [C7]	P10321	HLAC_C188	2178.16	128	112.5	88.2	72	92.3	107
[K].LVVVDFSATWCGPCK.[M]	1xCarbamidomethyl [C14]; 1xTMT6plex [K15]; 1xTMT6plex [N-Term]; 1xIA-DTB [C11]	P10599	THIO_C32	2649.43	206.2	167.2	53.7	55.9	60.2	56.8
[K].TAFQEALDAAGDKLVVVDFSATWCGPCK.[M]	1xCarbamidomethyl [C27]; 2xTMT6plex [K13; K28]; 1xTMT6plex [N-Term]; 1xIA-DTB [C24]	P10599	THIO_C32	4196.21	134.5	183.8	75.9	66.5	61.1	78.2
[K].CMPTFQFFK.[K]	1xOxidation [M2]; 1xTMT6plex [K9]; 1xTMT6plex [N-Term]; 1xIA-DTB [C1]	P10599	THIO_C73	2132.14	85.8	117.4	90.7	103.8	90.8	111.6
[K].CMPTFQFFK.[K]	1xTMT6plex [K9]; 1xTMT6plex [N-Term]; 1xIA-DTB [C1]	P10599	THIO_C73	2116.15	88.3	126	99.1	106.4	89.9	90.2
[R].SLRECELYVQK.[H]	1xTMT6plex [K11]; 1xTMT6plex [N-Term]; 1xIA-DTB [C5]	P10644	KAP0_C18	2335.32	78.8	115.8	105.9	84	89.1	126.4
[K].SVSAFAPICNPVLCPWGK.[K]	1xCarbamidomethyl [C9]; 1xTMT6plex [K18]; 1xTMT6plex [N-Term]; 1xIA-DTB [C14]	P10768	ESTD_C181	2913.59	86.7	100	99.8	95.4	104.7	113.5
[K].AETGKCPALYWLSGLTCTEQNFISK.[S]	1xCarbamidomethyl [C6]; 2xTMT6plex [K5; K25]; 1xTMT6plex [N-Term]; 1xIA-DTB [C17]	P10768	ESTD_C56	4014.14	68.3	99.1	138.5	81.7	78.8	133.7
[K].GQKCEFQDAYVLLSEK.[K]	2xTMT6plex [K3; K16]; 1xTMT6plex [N-Term]; 1xIA-DTB [C4]	P10809	CH60_C237	3054.69	101.2	86.6	104	109	102.4	96.8
[K].CEFQDAYVLLSEKK.[I]	2xTMT6plex [K13; K14]; 1xTMT6plex [N-Term]; 1xIA-DTB [C1]	P10809	CH60_C237	2869.61	74.6	99.6	93.1	129.2	106.7	96.8
[K].CEFQDAYVLLSEK.[K]	1xTMT6plex [K13]; 1xTMT6plex [N-Term]; 1xIA-DTB [C1]	P10809	CH60_C237	2512.35	89.7	91.6	84.7	135.2	112	86.9
[R].AAVEEGIVLGGGCALLR.[C]	1xTMT6plex [N-Term]; 1xIA-DTB [C13]	P10809	CH60_C442	2366.34	103.8	88.5	120	103.4	83.3	101
[R].CIPALDSLTPANEDQK.[I]	1xTMT6plex [K16]; 1xTMT6plex [N-Term]; 1xIA-DTB [C1]	P10809	CH60_C447	2682.45	80.3	93	95.9	134.2	112	84.6
[K].GPAVGIDLGTTYSCVGVFQHGK.[V]	1xTMT6plex [K22]; 1xTMT6plex [N-Term]; 1xIA-DTB [C14]	P11142	HSP7C_C17	3173.72	154	81	73.2	103.4	108.8	79.7
[K].VCNPIITK.[L]	1xTMT6plex [K8]; 1xTMT6plex [N-Term]; 1xIA-DTB [C2]	P11142	HSP7C_C603	1855.12	92.9	87.5	73	137.6	131.2	77.9
[R].LHSVCTLSK.[M]	1xTMT6plex [K9]; 1xTMT6plex [N-Term]; 1xIA-DTB [C5]	P11172	UMPS_C174	1955.15	89.5	101.5	86.1	94.8	122.8	105.3
[R].ELLQLADALGPSICMLK.[T]	1xTMT6plex [K17]; 1xTMT6plex [N-Term]; 1xIA-DTB [C14]	P11172	UMPS_C278	2782.6	104.7	94.7	73.3	86.7	113.9	126.8
[K].IPHFGYCDEIDLTELVK.[L]	1xTMT6plex [K17]; 1xTMT6plex [N-Term]; 1xIA-DTB [C7]	P11182	ODB2_C279	2959.6	115.8	107.6	107	90.8	79.7	99.1
[R].TCFETFPDKVAIQLNDTHPALSIPELMR.[I]	1xTMT6plex [K9]; 1xTMT6plex [N-Term]; 1xIA-DTB [C2]	P11216	PYGB_C326	4154.22	83.1	110.5	94.6	111.3	106.2	94.4
[R].AVAILCNHQR.[A]	1xTMT6plex [N-Term]; 1xIA-DTB [C6]	P11387	TOP1_C630	1863.06	102.7	95.8	107.6	98.5	90.5	104.8
[K].LQTSLTCNSMVLFDHVGCLK.[K]	1xCarbamidomethyl [C7]; 1xTMT6plex [K20]; 1xTMT6plex [N-Term]; 1xIA-DTB [C18]	P11388	TOP2A_C1008	3233.72	106.4	88	95.3	97.8	106.1	106.5
[K].SFGSTCQLSEK.[F]	1xTMT6plex [K11]; 1xTMT6plex [N-Term]; 1xIA-DTB [C6]	P11388	TOP2A_C392	2154.16	82.9	107.1	103.4	98.7	97.5	110.4
[K].AAIGCGIVESILNWVK.[F]	1xTMT6plex [K16]; 1xTMT6plex [N-Term]; 1xIA-DTB [C5]	P11388	TOP2A_C405	2640.53	123.3	110.6	92.6	102.9	85.6	85
[R].LQFHDVAGDIFHQQCK.[R]	1xTMT6plex [K16]; 1xTMT6plex [N-Term]; 1xIA-DTB [C15]	P11413	G6PD_C385	2853.52	88.9	98.8	99.5	102.9	109.8	100.1
[R].LILDVFCGSQMHFVR.[S]	1xTMT6plex [N-Term]; 1xIA-DTB [C7]	P11413	G6PD_C446	2503.35	140.8	76.3	100.5	77.7	96.7	108.1
[R].GLYAAFDCTATMK.[S]	1xTMT6plex [K13]; 1xTMT6plex [N-Term]; 1xIA-DTB [C8]	P11498	PYC_C850	2359.26	105.7	89	111.1	106.2	86.9	101.1
[K].IVGAPMHDLLLWNNATVTTCHSK.[T]	1xTMT6plex [K23]; 1xTMT6plex [N-Term]; 1xIA-DTB [C20]	P11586	C1TC_C195	3488.89	90.4	90.7	100.8	102.9	103.8	111.4
[K].QGFGNLPICMAK.[T]	1xTMT6plex [K12]; 1xTMT6plex [N-Term]; 1xIA-DTB [C9]	P11586	C1TC_C863	2246.26	72.8	104.6	113.3	99	94.5	115.8
[R].KPLFCGNSEADQLGK.[I]	2xTMT6plex [K1; K15]; 1xTMT6plex [N-Term]; 1xIA-DTB [C5]	P11802	CDK4_C215	2803.57	107	87	87.8	103.1	112.3	102.9
[R].VAILVDDMADTCGTICHAADK.[L]	1xCarbamidomethyl [C16]; 1xTMT6plex [K21]; 1xTMT6plex [N-Term]; 1xIA-DTB [C12]	P11908	PRPS2_C226	3186.64	110.2	84.6	103.1	96.6	105.1	100.4
[K].LMDLDVEQLGIPEQEYSCVVK.[M]	1xTMT6plex [K21]; 1xTMT6plex [N-Term]; 1xIA-DTB [C18]	P12004	PCNA_C135	3375.79	100.7	77.4	99.3	130.8	120.8	70.9
[R].DLSHIGDAVVISCAK.[D]	1xTMT6plex [K15]; 1xTMT6plex [N-Term]; 1xIA-DTB [C13]	P12004	PCNA_C162	2495.41	100.1	88	97.5	110.3	113.8	90.3
[R].VGMGSGSICITQEVLACGRPQATAVYK.[V]	1xCarbamidomethyl [C17]; 1xTMT6plex [K27]; 1xTMT6plex [N-Term]; 1xIA-DTB [C9]	P12268	IMDH2_C331	3764.01	83.9	94.9	125.4	89.3	84.9	121.5
[R].FCTGLTQIETLFK.[S]	1xTMT6plex [K13]; 1xTMT6plex [N-Term]; 1xIA-DTB [C2]	P12277	KCRB_C254	2468.4	87.8	104.4	94.4	123.6	106.9	82.8
[K].SKDYEFMWNPHLGYILTCPSNLGTGLR.[A]	1xOxidation [M7]; 1xTMT6plex [K2]; 1xTMT6plex [N-Term]; 1xIA-DTB [C18]	P12277	KCRB_C283	4096.12	182	201.3	108.4	77.5	15.9	14.9
[K].DYEFMWNPHLGYILTCPSNLGTGLR.[A]	1xTMT6plex [N-Term]; 1xIA-DTB [C16]	P12277	KCRB_C283	3635.83	224.3	183.1	97.7	84.4	4.1	6.4
[K].SKDYEFMWNPHLGYILTCPSNLGTGLR.[A]	1xTMT6plex [K2]; 1xTMT6plex [N-Term]; 1xIA-DTB [C18]	P12277	KCRB_C283	4080.12	152.7	211.2	120.2	104.3	5.7	5.8
[R].DYPLELFMAQCYGNISDLGK.[G]	1xTMT6plex [K20]; 1xTMT6plex [N-Term]; 1xIA-DTB [C11]	P12694	ODBA_C178	3244.68	106.5	99.4	106	89.6	87.4	111.1
[R].QMPVHYGCK.[E]	1xTMT6plex [K9]; 1xTMT6plex [N-Term]; 1xIA-DTB [C8]	P12694	ODBA_C197	2030.11	104.7	129.4	83.6	90.1	92.6	99.7
[K].CQLEINFNTLQTK.[L]	1xTMT6plex [K13]; 1xTMT6plex [N-Term]; 1xIA-DTB [C1]	P12814	ACTN1_C332	2519.41	96.2	99	83.4	115.3	117	89.2
[R].MVSDINNAWGCLEQVEK.[G]	1xTMT6plex [K17]; 1xTMT6plex [N-Term]; 1xIA-DTB [C11]	P12814	ACTN1_C370	2903.52	100.3	87.9	92.5	115.9	111.4	92
[K].LGQGCFGEVWMGTWNGTTR.[V]	1xTMT6plex [N-Term]; 1xIA-DTB [C5]	P12931	SRC_C280	2838.4	115.5	86.6	91.6	106.6	105.9	93.8
[R].IEEDVVVTDSGIELLTCVPR.[T]	1xTMT6plex [N-Term]; 1xIA-DTB [C17]	P12955	PEPD_C467	2925.58	109.8	81.9	110.8	101.2	97.3	98.9
[R].TVEEIEACMAGCDK.[A]	1xCarbamidomethyl [C8]; 1xTMT6plex [K14]; 1xTMT6plex [N-Term]; 1xIA-DTB [C12]	P12955	PEPD_C482	2523.27	86.5	95.7	114.4	97.1	86.8	119.5
[K].CDISLQFFLPFSLGK.[E]	1xTMT6plex [K15]; 1xTMT6plex [N-Term]; 1xIA-DTB [C1]	P13010	XRCC5_C157	2682.51	87.6	102.6	86.2	118.8	110.2	94.6
[K].KCDISLQFFLPFSLGK.[E]	2xTMT6plex [K1; K16]; 1xTMT6plex [N-Term]; 1xIA-DTB [C2]	P13010	XRCC5_C157	3039.77	58.3	105.9	108	129.3	121.4	77
[R].HSIHWPCR.[L]	1xTMT6plex [N-Term]; 1xIA-DTB [C7]	P13010	XRCC5_C249	1773.95	136.1	109.4	82.8	31.4	139	101.3
[K].ETVYCLNDDDETEVLKEDIIQGFR.[Y]	1xTMT6plex [K16]; 1xTMT6plex [N-Term]; 1xIA-DTB [C5]	P13010	XRCC5_C296	3811.95	91.9	86.8	100.4	118.8	106.2	95.8
[R].LLCETLLEPGCQLESLWVK.[S]	1xCarbamidomethyl [C3]; 1xTMT6plex [K19]; 1xTMT6plex [N-Term]; 1xIA-DTB [C11]	P13489	RINI_C313	3198.77	83	64.6	90.5	77.7	130.1	154.1
[R].ELDLSNNCLGDAGILQLVESVR.[Q]	1xTMT6plex [N-Term]; 1xIA-DTB [C8]	P13489	RINI_C409	3096.66	97.5	86.9	119.8	90.5	93.2	112.1
[R].SNELGDVGVHCVLQGLQTPSCK.[I]	1xCarbamidomethyl [C21]; 1xTMT6plex [K22]; 1xTMT6plex [N-Term]; 1xIA-DTB [C11]	P13489	RINI_C75	3308.75	77.8	99.8	113.7	101.8	90.5	116.4
[K].YRCELLYEGPPDDEAAMGIK.[S]	1xTMT6plex [K20]; 1xTMT6plex [N-Term]; 1xIA-DTB [C3]	P13639	EF2_C369	3237.67	84.4	85.3	79.6	94	117.9	138.7
[R].YVEPIEDVPCGNIVGLVGVDQFLVK.[T]	1xTMT6plex [K25]; 1xTMT6plex [N-Term]; 1xIA-DTB [C10]	P13639	EF2_C466	3670.03	102.8	76.9	94.5	116.1	110.4	99.4
[R].ETVSEESNVLCLSK.[S]	1xTMT6plex [K14]; 1xTMT6plex [N-Term]; 1xIA-DTB [C11]	P13639	EF2_C591	2505.36	93	85.2	75	95.7	128.9	122.3
[R].KIWCFGPDGTGPNILTDITK.[G]	2xTMT6plex [K1; K20]; 1xTMT6plex [N-Term]; 1xIA-DTB [C4]	P13639	EF2_C651	3372.9	103.1	99.2	96.4	100.6	97.9	102.8
[K].IWCFGPDGTGPNILTDITK.[G]	1xTMT6plex [K19]; 1xTMT6plex [N-Term]; 1xIA-DTB [C3]	P13639	EF2_C651	3015.64	81	100	104.2	104.4	102.4	107.9
[R].CLYASVLTAQPR.[L]	1xTMT6plex [N-Term]; 1xIA-DTB [C1]	P13639	EF2_C728	2060.15	84.6	106.4	73.1	87.8	126.5	121.6
[R].LMEPIYLVEIQCPEQVVGGIYGVLNR.[K]	1xTMT6plex [N-Term]; 1xIA-DTB [C12]	P13639	EF2_C751	3670.99	112.4	74.8	65.9	92.2	141.9	112.8
[R].LMEPIYLVEIQCPEQVVGGIYGVLNR.[K]	1xOxidation [M2]; 1xTMT6plex [N-Term]; 1xIA-DTB [C12]	P13639	EF2_C751	3686.99	77.8	79.1	72.5	109.2	147	114.4
[R].SNTGGQAFPQCVFDHWQILPGDPFDNSSRPSQVVAETR.[K]	1xTMT6plex [N-Term]; 1xIA-DTB [C11]	P13639	EF2_C812	4926.42	71.9	104.2	86.6	99.1	112.5	125.6
[K].KDVLIEFYAPWCGHCK.[Q]	1xCarbamidomethyl [C15]; 2xTMT6plex [K1; K16]; 1xTMT6plex [N-Term]; 1xIA-DTB [C12]	P13667	PDIA4_C555	3162.72	88.8	114.2	106.9	83.4	91.4	115.3
[K].IREIADGLCLEVEGK.[M]	1xTMT6plex [K15]; 1xTMT6plex [N-Term]; 1xIA-DTB [C9]	P13693	TCTP_C28	2612.48	100.9	86.6	90.4	116.9	116	89.3
[K].MVMTVFACLMGK.[G]	1xTMT6plex [K12]; 1xTMT6plex [N-Term]; 1xIA-DTB [C8]	P13796	PLSL_C618	2298.26	76.4	106.7	88.9	123.8	115.9	88.3
[K].EGICALGGTSELSSEGTQHSYSEEEK.[Y]	1xTMT6plex [K26]; 1xTMT6plex [N-Term]; 1xIA-DTB [C4]	P13797	PLST_C104	3695.81	152.3	68.3	86.6	107.3	102.4	83.2
[K].VDLNSNGFICDYELHELFK.[E]	1xTMT6plex [K19]; 1xTMT6plex [N-Term]; 1xIA-DTB [C10]	P13797	PLST_C33	3223.69	100.4	90.6	103.1	100.2	100.5	105.2
[K].TISSSLAVVDLIDAIQPGCINYDLVK.[S]	1xTMT6plex [K26]; 1xTMT6plex [N-Term]; 1xIA-DTB [C19]	P13797	PLST_C566	3715.08	95.6	67.6	93.8	135.3	132.2	75.6
[K].MVMTVFACLMGR.[G]	1xOxidation [M3]; 1xTMT6plex [N-Term]; 1xIA-DTB [C8]	P13797	PLST_C621	2113.1	109.3	115.7	85.8	89.9	95.4	103.9
[R].QLGENFSGIYCSLLPLGCWSADSQR.[V]	1xCarbamidomethyl [C11]; 1xTMT6plex [N-Term]; 1xIA-DTB [C18]	P13798	ACPH_C368	3539.76	99.3	80.5	86.7	128.5	109	96.1
[R].MCLDQYSMLPATPWGVWEIIK.[R]	1xOxidation [M]; 1xTMT6plex [K21]; 1xTMT6plex [N-Term]; 1xIA-DTB [C2]	P13995	MTDC_C166	3464.82	83.7	103.3	92.5	107.1	109	104.4
[R].MCLDQYSMLPATPWGVWEIIK.[R]	1xTMT6plex [K21]; 1xTMT6plex [N-Term]; 1xIA-DTB [C2]	P13995	MTDC_C166	3448.82	91	96.3	87.8	114	104.9	106
[R].MCLDQYSMLPATPWGVWEIIKR.[T]	1xTMT6plex [K21]; 1xTMT6plex [N-Term]; 1xIA-DTB [C2]	P13995	MTDC_C166	3604.92	69.4	112.2	114.1	96.1	86.3	121.9
[K].LLCGLLAER.[L]	1xTMT6plex [N-Term]; 1xIA-DTB [C3]	P14174	MIF_C81	1726.02	103.7	91.5	84.5	128.9	114.5	76.8
[R].GQICWYQKPGVGLDAINDANLLEACIYR.[L]	1xCarbamidomethyl [C4]; 1xTMT6plex [K8]; 1xTMT6plex [N-Term]; 1xIA-DTB [C25]	P14324	FPPS_C204	4148.18	136.7	96.5	83.4	95.5	101.2	86.7
[R].FNLFPCVLGSPCFIAGR.[H]	1xCarbamidomethyl [C12]; 1xTMT6plex [N-Term]; 1xIA-DTB [C6]	P14373	TRI27_C359	2636.4	72.3	108.5	66.6	76.8	126.4	149.3
[K].WTIGVCEDSVCR.[K]	1xCarbamidomethyl [C6]; 1xTMT6plex [N-Term]; 1xIA-DTB [C11]	P14373	TRI27_C393	2163.09	92.4	134.3	95.1	93.8	84	100.4
[K].CDENILWLDYK.[N]	1xTMT6plex [K11]; 1xTMT6plex [N-Term]; 1xIA-DTB [C1]	P14618	KPYM_C152	2379.28	98.4	98.8	59.1	139.6	133.2	71
[R].AGKPVICATQMLESMIK.[K]	1xOxidation [M]; 2xTMT6plex [K3; K17]; 1xTMT6plex [N-Term]; 1xIA-DTB [C7]	P14618	KPYM_C326	3032.73	121.4	99	88	91.6	104.5	95.6
[R].AGKPVICATQMLESMIK.[K]	2xTMT6plex [K3; K17]; 1xTMT6plex [N-Term]; 1xIA-DTB [C7]	P14618	KPYM_C326	3016.73	120.3	98.1	86.8	96.5	102.8	95.4
[K].CCSGAIIVLTK.[S]	1xCarbamidomethyl [C2]; 1xTMT6plex [K11]; 1xTMT6plex [N-Term]; 1xIA-DTB [C1]	P14618	KPYM_C423	2132.23	86	113.1	90.1	105.6	111.2	94
[R].GIFPVLCKDPVQEAWAEDVDLR.[V]	1xTMT6plex [K8]; 1xTMT6plex [N-Term]; 1xIA-DTB [C7]	P14618	KPYM_C474	3467.88	144.4	77.7	77.1	124.6	108.5	67.7
[R].LTESPCALVASQYGWSGNMER.[I]	1xOxidation [M19]; 1xTMT6plex [N-Term]; 1xIA-DTB [C6]	P14625	ENPL_C645	3053.5	105.4	81.1	72.2	122.1	130.2	88.9
[R].LTESPCALVASQYGWSGNMER.[I]	1xTMT6plex [N-Term]; 1xIA-DTB [C6]	P14625	ENPL_C645	3037.51	104.7	80.8	90.3	131.3	105.7	87.2
[K].ASLNGADIYSGCCTLK.[I]	1xCarbamidomethyl [C12]; 1xTMT6plex [K16]; 1xTMT6plex [N-Term]; 1xIA-DTB [C13]	P14866	HNRPL_C261	2640.39	110.9	90.5	95.2	105.8	109.6	88
[R].VFNVFCLYGNVEK.[V]	1xTMT6plex [K13]; 1xTMT6plex [N-Term]; 1xIA-DTB [C6]	P14866	HNRPL_C404	2499.38	91	87.4	94.8	132	116.3	78.6
[K].QPAIMPGQSYGLEDGSCSYKDFSESR.[N]	1xOxidation [M5]; 1xTMT6plex [K20]; 1xTMT6plex [N-Term]; 1xIA-DTB [C17]	P14866	HNRPL_C472	3835.87	85.5	90.8	121.8	99.5	89.6	112.8
[K].QPAIMPGQSYGLEDGSCSYKDFSESR.[N]	1xTMT6plex [K20]; 1xTMT6plex [N-Term]; 1xIA-DTB [C17]	P14866	HNRPL_C472	3819.87	81.4	92.1	122.1	101.3	90.6	112.4
[K].QPAIMPGQSYGLEDGSCSYK.[D]	1xOxidation [M5]; 1xTMT6plex [K20]; 1xTMT6plex [N-Term]; 1xIA-DTB [C17]	P14866	HNRPL_C472	3114.56	111.2	85.3	101.1	110.8	96	95.7
[R].EAMCPGVSGEDSSLLLATQVEGQATNLQR.[L]	1xTMT6plex [N-Term]; 1xIA-DTB [C4]	P14923	PLAK_C90	3742.89	102	100.4	104.1	90.5	88.2	114.8
[R].VCALLSCTSHK.[D]	1xCarbamidomethyl [C7]; 1xTMT6plex [K11]; 1xTMT6plex [N-Term]; 1xIA-DTB [C2]	P15121	ALDR_C299	2186.22	169.3	60	79.7	87.5	92.7	110.8
[K].EGILSDEIYCPPETAVLLGSYAVQAK.[F]	1xTMT6plex [K26]; 1xTMT6plex [N-Term]; 1xIA-DTB [C10]	P15311	EZRI_C117	3734.01	140.6	75.3	56.1	127.8	142.6	57.6
[K].NCEEVGLFNELASPFENEFKK.[A]	2xTMT6plex [K20; K21]; 1xTMT6plex [N-Term]; 1xIA-DTB [C2]	P15336	ATF2_C79	3640.93	95.8	108	82	77.5	97.4	139.3
[K].QTISNACGTIGLIHAIANNKDK.[M]	2xTMT6plex [K20; K22]; 1xTMT6plex [N-Term]; 1xIA-DTB [C7]	P15374	UCHL3_C95	3478.98	89.1	90.8	112.2	99.7	85.9	122.3
[K].LTFEDVAVLLSQDEWDRLCPAQR.[G]	1xTMT6plex [N-Term]; 1xIA-DTB [C19]	P15622	ZN250_C40	3442.8	87.8	84.2	102.7	108	92.9	124.4
[R].GCTATLGNFAK.[A]	1xTMT6plex [K11]; 1xTMT6plex [N-Term]; 1xIA-DTB [C2]	P15880	RS2_C229	2050.15	117.3	94.3	90.2	108.6	105.1	84.6
[R].DANSENCNK.[N]	1xTMT6plex [K9]; 1xTMT6plex [N-Term]; 1xIA-DTB [C7]	P15924	DESP_C1052	1962.01	102.9	103.3	82.1	97.2	106.2	108.4
[K].GGGGYTCQSGSGWDEFTK.[H]	1xTMT6plex [K18]; 1xTMT6plex [N-Term]; 1xIA-DTB [C7]	P15924	DESP_C174	2804.37	121.6	105.5	93.2	79.9	90	109.8
[R].ETQTECEWTVDTSK.[L]	1xTMT6plex [K14]; 1xTMT6plex [N-Term]; 1xIA-DTB [C6]	P15924	DESP_C1957	2624.33	102.6	107	103.4	83.7	89.5	113.8
[R].GVITDQNSDGYCQTGTMSR.[H]	1xTMT6plex [N-Term]; 1xIA-DTB [C12]	P15924	DESP_C57	2771.33	134.8	97.3	97	77.9	95.9	97.2
[R].RGVITDQNSDGYCQTGTMSR.[H]	1xTMT6plex [N-Term]; 1xIA-DTB [C13]	P15924	DESP_C57	2927.43	97.8	116	99	87.5	88.7	111.1
[K].YCYLQNEVFGLFQK.[L]	1xTMT6plex [K14]; 1xTMT6plex [N-Term]; 1xIA-DTB [C2]	P15924	DESP_C740	2719.47	121.2	126.1	71.8	87.7	102.3	90.8
[K].LENINGVTDGYLNSLCTVR.[A]	1xTMT6plex [N-Term]; 1xIA-DTB [C16]	P15924	DESP_C768	2819.49	93.6	101	87.6	91.2	116.4	110.2
[K].STIQNLESSSNQALNCK.[F]	1xTMT6plex [K17]; 1xTMT6plex [N-Term]; 1xIA-DTB [C16]	P16383	GCFC2_C320	2804.5	78.7	108.5	108.7	111.2	89.4	103.5
[K].VFEEVQDDFCNIQNILLK.[F]	1xTMT6plex [K18]; 1xTMT6plex [N-Term]; 1xIA-DTB [C10]	P16383	GCFC2_C465	3134.7	76.4	69.6	110.4	95.8	113.6	134.2
[R].SLPSVETLGCTSVICSDK.[T]	1xCarbamidomethyl [C10]; 1xTMT6plex [K18]; 1xTMT6plex [N-Term]; 1xIA-DTB [C15]	P16615	AT2A2_C349	2863.53	84.6	98.3	99.6	84.3	111.2	122
[R].NYLEPGKECVQPATK.[S]	2xTMT6plex [K7; K15]; 1xTMT6plex [N-Term]; 1xIA-DTB [C9]	P16615	AT2A2_C997	2873.62	79.2	107.8	106.3	111.6	98.2	96.8
[R].KSDCAQDK.[S]	2xTMT6plex [K1; K8]; 1xTMT6plex [N-Term]; 1xIA-DTB [C4]	P17509	HXB6_C108	2091.18	73.3	121.3	101.3	94.3	122.1	87.8
[K].RPTEICADPQFIIGGATR.[T]	1xTMT6plex [N-Term]; 1xIA-DTB [C6]	P17655	CAN2_C82	2683.46	88.8	88.1	109.8	112.2	101.2	99.8
[R].GLGLSPDLVVCR.[C]	1xTMT6plex [N-Term]; 1xIA-DTB [C11]	P17812	PYRG1_C216	1967.13	110.8	94.3	98.4	90.3	105.3	100.9
[K].LCSAHGVLVPGGFGVR.[G]	1xTMT6plex [N-Term]; 1xIA-DTB [C2]	P17812	PYRG1_C362	2307.3	122.2	80.9	93.9	84.8	110.1	108.1
[R].GHNCPKPVLNFYEANFPANVMDVIAR.[Q]	1xTMT6plex [K6]; 1xTMT6plex [N-Term]; 1xIA-DTB [C4]	P17844	DDX5_C89	3884.05	53.3	115.7	80.6	115.3	140.2	95.1
[K].MGMEAVMALLEATPDTPACVVTLSGNQSVR.[L]	1xTMT6plex [N-Term]; 1xIA-DTB [C19]	P17858	PFKAL_C334	3829.95	102.7	98.2	116.1	95	99.3	88.7
[R].YINENLIVNTDELGRDCLINAAK.[T]	1xTMT6plex [K23]; 1xTMT6plex [N-Term]; 1xIA-DTB [C17]	P17987	TCPA_C147	3558.94	88.8	90.3	106.1	105.6	108.4	100.9
[K].IACLDFSLQK.[T]	1xTMT6plex [K10]; 1xTMT6plex [N-Term]; 1xIA-DTB [C3]	P17987	TCPA_C236	2105.22	108.8	86	84.7	112.4	116	92.1
[K].ILATGANVILTTGGIDDMCLK.[Y]	1xTMT6plex [K21]; 1xTMT6plex [N-Term]; 1xIA-DTB [C19]	P17987	TCPA_C296	3086.74	100.3	83.8	85.8	117	118	95.1
[K].ILATGANVILTTGGIDDMCLK.[Y]	1xOxidation [M18]; 1xTMT6plex [K21]; 1xTMT6plex [N-Term]; 1xIA-DTB [C19]	P17987	TCPA_C296	3102.73	99.3	92.3	89.8	113.7	124.7	80.3
[R].ICDDELILIK.[N]	1xTMT6plex [K10]; 1xTMT6plex [N-Term]; 1xIA-DTB [C2]	P17987	TCPA_C357	2142.26	59.1	85.6	121.5	122.1	128.1	83.7
[K].NICFTVWDVGGQDR.[I]	1xTMT6plex [N-Term]; 1xIA-DTB [C3]	P18085	ARF4_C62	2348.2	86.1	112.5	96.9	106.6	107.7	90.3
[K].YGIICMEDLIHEIYTVGK.[R]	1xTMT6plex [K18]; 1xTMT6plex [N-Term]; 1xIA-DTB [C5]	P18124	RL7_C186	3064.66	139.5	90.8	89.9	93.5	105.7	80.6
[R].CVSVQTDPTDEIPTKK.[S]	2xTMT6plex [K15; K16]; 1xTMT6plex [N-Term]; 1xIA-DTB [C1]	P18583	SON_C92	2957.66	77.1	105.6	85.7	112.2	117.8	101.6
[R].INPYMSSPCHIEMILTEK.[E]	1xOxidation [M]; 1xTMT6plex [K18]; 1xTMT6plex [N-Term]; 1xIA-DTB [C9]	P18621	RL17_C144	3089.62	157.5	70.1	95.6	94.3	95.9	86.6
[R].VREDKQPEQATTSAQVACLYR.[K]	1xTMT6plex [K5]; 1xTMT6plex [N-Term]; 1xIA-DTB [C18]	P18858	DNLI1_C895	3360.81	89.7	103.6	102	97.8	98.7	108.2
[K].QPEQATTSAQVACLYR.[K]	1xTMT6plex [N-Term]; 1xIA-DTB [C13]	P18858	DNLI1_C895	2504.31	109.5	98.4	93.8	105.5	99.9	92.8
[R].AILQQLGLNSTCDDSILVK.[T]	1xTMT6plex [K19]; 1xTMT6plex [N-Term]; 1xIA-DTB [C12]	P19367	HXK1_C813	2998.7	97.1	89	114.5	102.4	94.3	102.7
[R].AAQLCGAGMAAVVDK.[I]	1xTMT6plex [K15]; 1xTMT6plex [N-Term]; 1xIA-DTB [C5]	P19367	HXK1_C834	2372.32	107.6	88	105.4	108.5	100	90.6
[R].ETCSLWPGQALSLQVEQLLHHR.[R]	1xTMT6plex [N-Term]; 1xIA-DTB [C3]	P19623	SPEE_C25	3283.76	99.9	86.4	112.1	94.2	94.3	113.2
[K].EQSQPCADNAVLSSGLTAAR.[-]	1xTMT6plex [N-Term]; 1xIA-DTB [C6]	P19784	CSK22_C336	2756.42	89.4	90.3	100.8	114.8	103.8	100.9
[R].LGTDESCFNMILATR.[S]	1xTMT6plex [N-Term]; 1xIA-DTB [C7]	P20073	ANXA7_C363	2409.25	85.8	83.8	106.8	96.8	96.9	129.9
[R].GGCPGGEATLSQPPPR.[G]	1xTMT6plex [N-Term]; 1xIA-DTB [C3]	P20290	BTF3_C22	2262.19	126	86.3	70.4	111	135	71.2
[K].AAAPAPVSEAVCR.[T]	1xTMT6plex [N-Term]; 1xIA-DTB [C12]	P20810	ICAL_C408	1980.09	166.3	123.7	73.9	80.1	83.6	72.4
[R].VGMGCGSICITQEVMACGRPQGTAVYK.[V]	2xCarbamidomethyl [C9; C17]; 1xTMT6plex [K27]; 1xTMT6plex [N-Term]; 1xIA-DTB [C5]	P20839	IMDH1_C327	3840.95	85.5	106	114.9	101.9	86.5	105.2
[K].IAAYLQSDQFCK.[M]	1xTMT6plex [K12]; 1xTMT6plex [N-Term]; 1xIA-DTB [C11]	P21266	GSTM3_C208	2354.29	88.4	103.1	99.7	108.1	101.5	99.3
[R].GPVVLAEDFLDIMGQPINPQCR.[I]	1xTMT6plex [N-Term]; 1xIA-DTB [C21]	P21281	VATB2_C162	3150.66	134.3	96.3	110.9	83.4	109.7	65.4
[K].AEISCTDNQDGTCSVSYLPVLPGDYSILVK.[Y]	1xCarbamidomethyl [C13]; 1xTMT6plex [K30]; 1xTMT6plex [N-Term]; 1xIA-DTB [C5]	P21333	FLNA_C1912	4212.16	129.7	79.8	103.2	95.6	80.1	111.7
[R].ELVDIFVVGQQCPLFEVPGPNSK.[R]	1xTMT6plex [K23]; 1xTMT6plex [N-Term]; 1xIA-DTB [C12]	P21675	TAF1_C786	3482.91	111.6	107.8	118.5	84.9	74.7	102.6
[R].EHINLGCDMDFDIAGPSIR.[G]	1xTMT6plex [N-Term]; 1xIA-DTB [C7]	P21796	VDAC1_C127	2841.42	26.1	103.5	116.3	128.7	176.6	48.8
[R].YLPDTLLLEECGLLR.[K]	1xTMT6plex [N-Term]; 1xIA-DTB [C11]	P21964	COMT_C207	2486.39	96.3	104.8	94.4	106.6	113.9	84.1
[K].GTVLLADNVICPGAPDFLAHVR.[G]	1xTMT6plex [N-Term]; 1xIA-DTB [C11]	P21964	COMT_C223	3016.66	115	96.8	107	89.8	91.3	100
[R].GSSCFECTHYQSFLEYR.[E]	1xCarbamidomethyl [C7]; 1xTMT6plex [N-Term]; 1xIA-DTB [C4]	P21964	COMT_C238	2852.33	174.4	61.4	95.9	88.5	91.2	88.6
[K].ALDVGSGSGILTACFAR.[M]	1xTMT6plex [N-Term]; 1xIA-DTB [C14]	P22061	PIMT_C95	2376.29	122.7	85.7	83.8	107.5	119.1	81.2
[K].ANCIDSTASAEAVFASEVKK.[M]	2xTMT6plex [K19; K20]; 1xTMT6plex [N-Term]; 1xIA-DTB [C3]	P22087	FBRL_C268	3237.78	98.8	88.4	107.9	109.2	92.9	102.9
[K].ANCIDSTASAEAVFASEVK.[K]	1xTMT6plex [K19]; 1xTMT6plex [N-Term]; 1xIA-DTB [C3]	P22087	FBRL_C268	2880.52	95	89.3	111.2	113.7	99.7	91.2
[K].NVMVEPHRHEGVFICR.[G]	1xTMT6plex [N-Term]; 1xIA-DTB [C15]	P22087	FBRL_C99	2661.41	71	118.3	96.3	88.4	114.1	111.9
[K].AFTKPEEACSFILSADFPALVVK.[A]	2xTMT6plex [K4; K23]; 1xTMT6plex [N-Term]; 1xIA-DTB [C9]	P22102	PUR2_C134	3680.07	100.3	94	115	103.7	93.5	93.4
[R].LLEGDGGPNTGGMGAYCPAPQVSNDLLLK.[I]	1xTMT6plex [K29]; 1xTMT6plex [N-Term]; 1xIA-DTB [C17]	P22102	PUR2_C237	3855.02	99.2	89.3	105.5	108.8	102.9	94.3
[K].QVLVAPGNAGTACSEK.[I]	1xTMT6plex [K16]; 1xTMT6plex [N-Term]; 1xIA-DTB [C13]	P22102	PUR2_C41	2512.4	84.6	92.8	109.7	106.3	103.4	103.3
[R].SAGVQCFGPTAEAAQLESSKR.[F]	1xTMT6plex [K20]; 1xTMT6plex [N-Term]; 1xIA-DTB [C6]	P22102	PUR2_C93	3104.66	76.6	105	108.8	99.5	98.8	111.2
[K].SWLPQNCTLVDMK.[I]	1xTMT6plex [K13]; 1xTMT6plex [N-Term]; 1xIA-DTB [C7]	P22234	PUR6_C185	2502.36	111.7	81.3	73.3	133.9	129.6	70.2
[R].SNGLGPVMSGNTAYPVISCPPLTPDWGVQDVWSSLR.[L]	1xTMT6plex [N-Term]; 1xIA-DTB [C19]	P22234	PUR6_C350	4539.3	59.1	102.1	118.1	109.3	119.3	92.1
[R].LPSGLGCSTVLSPEGSAQFAAQIFGLSNHLVWSK.[L]	1xTMT6plex [K34]; 1xTMT6plex [N-Term]; 1xIA-DTB [C7]	P22234	PUR6_C374	4469.41	184.5	70.9	86	85.1	88.8	84.7
[K].ITSCIFQLLQEAGIK.[T]	1xTMT6plex [K15]; 1xTMT6plex [N-Term]; 1xIA-DTB [C4]	P22234	PUR6_C63	2631.53	82.9	98.8	84.4	122	124	87.8
[R].KCGETAFIAPQCEMIPIEWVCR.[R]	2xCarbamidomethyl [C12; C21]; 1xTMT6plex [K1]; 1xTMT6plex [N-Term]; 1xIA-DTB [C2]	P22234	PUR6_C81	3605.85	92	106.1	101.8	95.8	103.4	100.9
[K].ADCTITMADSDFLALMTGK.[M]	1xTMT6plex [K19]; 1xTMT6plex [N-Term]; 1xIA-DTB [C3]	P22307	SCP2_C495	2971.53	117.3	86.9	84.2	120.2	110.6	80.8
[R].ALVLELCCNDESGEDVEVPYVR.[Y]	1xCarbamidomethyl [C8]; 1xTMT6plex [N-Term]; 1xIA-DTB [C7]	P22314	UBA1_C1039	3247.62	116.2	83.6	111.6	93	82.5	113
[K].DNPGVVTCLDEAR.[H]	1xTMT6plex [N-Term]; 1xIA-DTB [C8]	P22314	UBA1_C234	2127.11	97.7	86.9	88.6	126	113.7	87.1
[K].VLGPYTFSICDTSNFSDYIR.[G]	1xTMT6plex [N-Term]; 1xIA-DTB [C10]	P22314	UBA1_C278	3036.53	116	87.1	89.1	99.8	87.9	120.1
[K].YFLVGAGAIGCELLK.[N]	1xTMT6plex [K15]; 1xTMT6plex [N-Term]; 1xIA-DTB [C11]	P22314	UBA1_C481	2521.46	106.2	95.3	74.5	107.2	128.9	87.9
[K].QKYFLVGAGAIGCELLK.[N]	2xTMT6plex [K2; K17]; 1xTMT6plex [N-Term]; 1xIA-DTB [C13]	P22314	UBA1_C481	3006.78	94.7	96.5	87.9	103.1	110.5	107.4
[R].VCVPSSASALGTASK.[A]	1xTMT6plex [K15]; 1xTMT6plex [N-Term]; 1xIA-DTB [C2]	P22681	CBL_C508	2345.33	103.2	111.1	88.8	102.8	97.6	96.5
[R].NALANPLYCPDYR.[I]	1xTMT6plex [N-Term]; 1xIA-DTB [C9]	P22695	QCR2_C192	2248.17	88	97.5	94.6	103.3	107.1	109.5
[R].EIITLQLGQCGNQIGFEFWK.[Q]	1xTMT6plex [K20]; 1xTMT6plex [N-Term]; 1xIA-DTB [C10]	P23258	TBG1_C13	3291.8	129.8	65.2	117.6	79.3	121.4	86.7
[K].YCTFNDDIQGTAAVALAGLLAAQK.[V]	1xTMT6plex [K24]; 1xTMT6plex [N-Term]; 1xIA-DTB [C2]	P23368	MAOM_C274	3421.86	98.4	96.9	78.7	90.2	126.9	108.8
[K].RNEDACPVGTVSAAPWGSSSILPISWAYIK.[M]	1xTMT6plex [K30]; 1xTMT6plex [N-Term]; 1xIA-DTB [C6]	P23378	GCSP_C795	4143.21	96.5	85.9	99.5	104.5	113.8	99.8
[K].GIFGFTDSDCIGK.[I]	1xTMT6plex [K13]; 1xTMT6plex [N-Term]; 1xIA-DTB [C10]	P23381	SYWC_C274	2327.25	123.3	82.9	92.5	104.8	104.2	92.2
[R].GLCAIAQAESLR.[Y]	1xTMT6plex [N-Term]; 1xIA-DTB [C3]	P23396	RS3_C97	1970.11	115.1	89.7	100.2	97.7	102.2	95.1
[K].QAQYLGMSCDGPFKPDHYRY.[-]	1xTMT6plex [K14]; 1xTMT6plex [N-Term]; 1xIA-DTB [C9]	P23526	SAHH_C421	3343.68	83.6	96.2	112.5	96.8	86.5	124.4
[K].QAQYLGMSCDGPFKPDHYR.[Y]	1xTMT6plex [K14]; 1xTMT6plex [N-Term]; 1xIA-DTB [C9]	P23526	SAHH_C421	3180.61	88.2	84.9	117.7	96.9	105.4	106.9
[K].LTGIKHELQANCYEEVK.[D]	2xTMT6plex [K5; K17]; 1xTMT6plex [N-Term]; 1xIA-DTB [C12]	P23528	COF1_C139	3171.78	76.8	99.7	104	100.1	99.6	119.8
[R].LVCPAAYGEPLQAAASALGAAVR.[L]	1xTMT6plex [N-Term]; 1xIA-DTB [C3]	P23610	HAP40_C110	2937.62	67.2	110.2	111.6	94.6	88.4	128.1
[K].SAGGIGVAVSCIR.[A]	1xTMT6plex [N-Term]; 1xIA-DTB [C11]	P23921	RIR1_C254	1928.09	99.1	119.6	79.3	93.7	105.6	102.8
[K].RVETNQDWSLMCPNECPGLDEVWGEEFEK.[L]	1xCarbamidomethyl [C16]; 1xTMT6plex [K29]; 1xTMT6plex [N-Term]; 1xIA-DTB [C12]	P23921	RIR1_C352	4465.13	102	90.5	118.7	85.4	101.6	101.8
[K].RVETNQDWSLMCPNECPGLDEVWGEEFEK.[L]	1xCarbamidomethyl [C16]; 1xOxidation [M11]; 1xTMT6plex [K29]; 1xTMT6plex [N-Term]; 1xIA-DTB [C12]	P23921	RIR1_C352	4481.13	104	98.3	119.1	98.2	84.3	96.1
[K].IIDINYYPVPEACLSNKR.[H]	1xTMT6plex [K17]; 1xTMT6plex [N-Term]; 1xIA-DTB [C13]	P23921	RIR1_C492	3075.71	93.8	100.4	105.9	95.1	95.8	109.1
[K].QIFETIYYGALEASCDLAK.[E]	1xTMT6plex [K19]; 1xTMT6plex [N-Term]; 1xIA-DTB [C15]	P23921	RIR1_C544	3102.66	117.2	87.3	77.3	119.2	122.6	76.4
[K].SYIEGYVPSQADVAVFEAVSSPPPADLCHALR.[W]	1xTMT6plex [N-Term]; 1xIA-DTB [C28]	P24534	EF1B_C50	4127.11	133.2	60.2	83.6	102.7	116.2	104
[K].AIMMASQSLMCGHQDVMVAGGMESMSNVPYVMNR.[G]	1xTMT6plex [N-Term]; 1xIA-DTB [C11]	P24752	THIL_C142	4414.06	143.6	59.9	92.3	121.2	71.5	111.5
[K].QGEYGLASICNGGGGASAMLIQK.[L]	1xOxidation [M19]; 1xTMT6plex [K23]; 1xTMT6plex [N-Term]; 1xIA-DTB [C10]	P24752	THIL_C413	3208.69	81.7	95.3	102.5	108.3	89.1	123.1
[K].QGEYGLASICNGGGGASAMLIQKL.[-]	1xTMT6plex [K23]; 1xTMT6plex [N-Term]; 1xIA-DTB [C10]	P24752	THIL_C413	3305.78	55.5	112.9	138.4	82.9	69.3	141
[K].QGEYGLASICNGGGGASAMLIQK.[L]	1xTMT6plex [K23]; 1xTMT6plex [N-Term]; 1xIA-DTB [C10]	P24752	THIL_C413	3192.69	91.4	102.8	118.2	98.9	79.1	109.6
[K].GVSENIMLGQLAPAGTGCFDLLLDAEK.[C]	1xTMT6plex [K27]; 1xTMT6plex [N-Term]; 1xIA-DTB [C18]	P24928	RPB1_C1470	3730	127.2	90.8	101.3	84.3	103	93.4
[K].QIFSLIIPGHINCIR.[T]	1xTMT6plex [N-Term]; 1xIA-DTB [C13]	P24928	RPB1_C602	2462.43	81.4	86.2	74.1	78.6	128.7	151
[K].VVVENGELIMGILCK.[K]	1xTMT6plex [K15]; 1xTMT6plex [N-Term]; 1xIA-DTB [C14]	P24928	RPB1_C641	2584.5	99.3	87.4	89.2	77.4	112.1	134.5
[K].GVAYDSSADWFSLGCMLFK.[L]	1xTMT6plex [K19]; 1xTMT6plex [N-Term]; 1xIA-DTB [C15]	P25098	ARBK1_C379	3064.57	136.7	76.3	87.1	91.1	120	88.8
[R].TLTSCFLSCVVCVEGIVTK.[C]	2xCarbamidomethyl [C9; C12]; 1xTMT6plex [K19]; 1xTMT6plex [N-Term]; 1xIA-DTB [C5]	P25205	MCM3_C119	3083.67	81.8	106.9	104.3	97.7	91.1	118.1
[R].SVHYCPATK.[K]	1xTMT6plex [K9]; 1xTMT6plex [N-Term]; 1xIA-DTB [C5]	P25205	MCM3_C148	1973.1	137.3	81.8	87.8	102.6	94	96.4
[R].TVLIACNVK.[Q]	1xTMT6plex [K9]; 1xTMT6plex [N-Term]; 1xIA-DTB [C6]	P25205	MCM3_C263	1928.18	80.1	89.1	99.5	111.9	118.7	100.7
[R].RPYGVGLLIAGYDDMGPHIFQTCPSANYFDCR.[A]	1xCarbamidomethyl [C31]; 1xTMT6plex [N-Term]; 1xIA-DTB [C23]	P25786	PSA1_C148	4372.13	124.7	86.5	92.7	94.9	89.5	111.7
[R].RPYGVGLLIAGYDDMGPHIFQTCPSANYFDCR.[A]	1xCarbamidomethyl [C31]; 1xOxidation [M15]; 1xTMT6plex [N-Term]; 1xIA-DTB [C23]	P25786	PSA1_C148	4388.13	119.8	92.8	106.8	88.5	87.1	105
[K].ATCIGNNSAAAVSMLK.[Q]	1xTMT6plex [K16]; 1xTMT6plex [N-Term]; 1xIA-DTB [C3]	P25789	PSA4_C163	2518.39	104.1	86.9	71.4	94.9	131.7	111
[R].LQINQSIIFCNSSQR.[V]	1xTMT6plex [N-Term]; 1xIA-DTB [C10]	P26196	DDX6_C341	2489.35	118.2	86.1	78.7	114.9	120.2	82
[K].SQACEPSEPEIEIK.[L]	1xTMT6plex [K14]; 1xTMT6plex [N-Term]; 1xIA-DTB [C4]	P26358	DNMT1_C1125	2527.35	83.8	97.6	109	106.1	101.9	101.7
[K].LNLLHEFLQTEIKNQLCDLETK.[L]	2xTMT6plex [K13; K22]; 1xTMT6plex [N-Term]; 1xIA-DTB [C17]	P26358	DNMT1_C62	3839.17	88.9	101.3	105.9	102.7	99.6	101.6
[K].SIEIPRPVDGVEVPGCGK.[I]	1xTMT6plex [K18]; 1xTMT6plex [N-Term]; 1xIA-DTB [C16]	P26368	U2AF2_C429	2819.59	79	96	119.4	107.9	94.8	102.9
[K].IFVEFTSVFDCQK.[A]	1xTMT6plex [K13]; 1xTMT6plex [N-Term]; 1xIA-DTB [C11]	P26368	U2AF2_C442	2530.38	110	90.1	90.8	123	96.8	89.2
[K].RGSDELFSTCVTNGPFIMSSNSASAANGNDSK.[K]	1xTMT6plex [K32]; 1xTMT6plex [N-Term]; 1xIA-DTB [C10]	P26599	PTBP1_C23	4232.08	72.3	87	128.3	88.7	92	131.7
[R].GSDELFSTCVTNGPFIMSSNSASAANGNDSKK.[F]	2xTMT6plex [K31; K32]; 1xTMT6plex [N-Term]; 1xIA-DTB [C9]	P26599	PTBP1_C23	4433.23	74.7	90.3	139.2	90.7	104.7	100.4
[R].GSDELFSTCVTNGPFIMSSNSASAANGNDSK.[K]	1xOxidation [M17]; 1xTMT6plex [K31]; 1xTMT6plex [N-Term]; 1xIA-DTB [C9]	P26599	PTBP1_C23	4091.97	85.7	97.8	131.1	91.2	92.9	101.3
[R].GSDELFSTCVTNGPFIMSSNSASAANGNDSK.[K]	1xTMT6plex [K31]; 1xTMT6plex [N-Term]; 1xIA-DTB [C9]	P26599	PTBP1_C23	4075.97	74.8	95.6	128.5	101	95.6	104.5
[R].GSDELFSTCVTNGPFIMSSNSASAANGNDSKK.[F]	1xOxidation [M17]; 2xTMT6plex [K31; K32]; 1xTMT6plex [N-Term]; 1xIA-DTB [C9]	P26599	PTBP1_C23	4449.23	70.6	94.1	130.3	105.1	95.1	104.8
[K].LSLDGQNIYNACCTLR.[I]	1xCarbamidomethyl [C12]; 1xTMT6plex [N-Term]; 1xIA-DTB [C13]	P26599	PTBP1_C251	2579.33	108.1	90.7	89.7	109.8	115.7	86
[R].DQELYFFHELSPGSCFFLPK.[G]	1xTMT6plex [K20]; 1xTMT6plex [N-Term]; 1xIA-DTB [C15]	P26639	SYTC_C343	3371.75	127.6	76.5	100.9	97.3	96.7	101.1
[R].LVNWSCTLNSAISDIEVDKK.[E]	2xTMT6plex [K19; K20]; 1xTMT6plex [N-Term]; 1xIA-DTB [C6]	P26640	SYVC_C479	3431.92	96.6	84.9	102.5	99	111.5	105.5
[K].KAAAPAPEEEMDECEQALAAEPK.[A]	1xOxidation [M11]; 2xTMT6plex [K1; K23]; 1xTMT6plex [N-Term]; 1xIA-DTB [C14]	P26641	EF1G_C266	3640.88	103.3	83.5	99.5	107.9	107.3	98.5
[K].KAAAPAPEEEMDECEQALAAEPK.[A]	2xTMT6plex [K1; K23]; 1xTMT6plex [N-Term]; 1xIA-DTB [C14]	P26641	EF1G_C266	3624.89	99.8	90.2	105.2	109	100.1	95.7
[K].AAAPAPEEEMDECEQALAAEPK.[A]	1xOxidation [M10]; 1xTMT6plex [K22]; 1xTMT6plex [N-Term]; 1xIA-DTB [C13]	P26641	EF1G_C266	3283.62	109.3	85.4	103	111.8	96.6	93.9
[K].AAAPAPEEEMDECEQALAAEPK.[A]	1xTMT6plex [K22]; 1xTMT6plex [N-Term]; 1xIA-DTB [C13]	P26641	EF1G_C266	3267.63	118.1	84.8	104.8	106.2	94.6	91.5
[R].FPEELTQTFMSCNLITGMFQR.[L]	1xTMT6plex [N-Term]; 1xIA-DTB [C12]	P26641	EF1G_C339	3231.62	106.2	64.3	88.2	115.8	140.7	84.8
[K].MTAYITELSDMVPTCSALAR.[K]	1xTMT6plex [N-Term]; 1xIA-DTB [C15]	P27540	ARNT_C119	2911.49	106.5	114.8	110.7	81.6	91.5	95
[K].RLIPDGCGVK.[Y]	1xTMT6plex [K10]; 1xTMT6plex [N-Term]; 1xIA-DTB [C7]	P27635	RL10_C195	2025.2	84	108.2	104.9	103.1	97.8	102
[K].VDEFPLCGHMVSDEYEQLSSEALEAAR.[I]	1xTMT6plex [N-Term]; 1xIA-DTB [C7]	P27635	RL10_C49	3763.81	106.4	100.1	106	97.7	87	102.9
[K].VDEFPLCGHMVSDEYEQLSSEALEAAR.[I]	1xOxidation [M10]; 1xTMT6plex [N-Term]; 1xIA-DTB [C7]	P27635	RL10_C49	3779.81	79.4	98.9	121.5	100.3	91.6	108.3
[K].AKVDEFPLCGHMVSDEYEQLSSEALEAAR.[I]	1xTMT6plex [K2]; 1xTMT6plex [N-Term]; 1xIA-DTB [C9]	P27635	RL10_C49	4192.11	115.5	88.4	114.4	96.8	81.9	103
[K].AKVDEFPLCGHMVSDEYEQLSSEALEAAR.[I]	1xOxidation [M12]; 1xTMT6plex [K2]; 1xTMT6plex [N-Term]; 1xIA-DTB [C9]	P27635	RL10_C49	4208.1	129.2	87	100.8	104.7	74.7	103.6
[R].LDYFLLSHSLLPALCDSK.[I]	1xTMT6plex [K18]; 1xTMT6plex [N-Term]; 1xIA-DTB [C15]	P27695	APEX1_C296	3002.68	122.1	90.6	74.2	124	111.3	77.8
[K].QLCEDWEVVPEPVAR.[W]	1xTMT6plex [N-Term]; 1xIA-DTB [C3]	P27707	DCK_C45	2508.31	87.3	101.2	106.7	112.3	96.4	96.2
[K].VTAVDWHFEEAVDGECPPQR.[S]	1xTMT6plex [N-Term]; 1xIA-DTB [C16]	P27708	PYR1_C1374	3023.49	87.4	106.7	116.8	96.5	95.9	96.7
[R].KVAEPELMGTPDGTCYPPPPVPR.[Q]	1xTMT6plex [K1]; 1xTMT6plex [N-Term]; 1xIA-DTB [C15]	P27708	PYR1_C1889	3418.83	106	99.4	113.5	87.3	92.9	100.9
[K].VAEPELMGTPDGTCYPPPPVPR.[Q]	1xTMT6plex [N-Term]; 1xIA-DTB [C14]	P27708	PYR1_C1889	3061.57	91.7	100.5	116.2	94.9	93.1	103.5
[K].GESLADSVQTMSCYADVVVLR.[H]	1xTMT6plex [N-Term]; 1xIA-DTB [C13]	P27708	PYR1_C2016	2981.53	134.4	85.2	101.7	84.3	83.9	110.5
[R].FGSTQEYEACFGQFILTPHIMTR.[A]	1xTMT6plex [N-Term]; 1xIA-DTB [C10]	P27708	PYR1_C2161	3414.72	81.2	97.9	109.7	98.1	91.4	121.8
[R].LCPPGIPTPGSGLPPPRK.[V]	1xTMT6plex [K18]; 1xTMT6plex [N-Term]; 1xIA-DTB [C2]	P27708	PYR1_C379	2751.61	97.8	101.3	103.5	104.7	93.2	99.4
[K].AQILVLTYPLIGNYGIPPDEMDEFGLCK.[W]	1xOxidation [M21]; 1xTMT6plex [K28]; 1xTMT6plex [N-Term]; 1xIA-DTB [C27]	P27708	PYR1_C73	4093.18	123.8	104.8	132.5	101.1	68.2	69.4
[K].KVIEINPYLLGTMAGGAADCSFWER.[L]	1xTMT6plex [K1]; 1xTMT6plex [N-Term]; 1xIA-DTB [C20]	P28074	PSB5_C111	3708.96	125.6	77.1	81.2	114.2	113.4	88.6
[K].VIEINPYLLGTMAGGAADCSFWER.[L]	1xTMT6plex [N-Term]; 1xIA-DTB [C19]	P28074	PSB5_C111	3351.71	113.3	86.6	92	108	115.8	84.3
[K].VIEINPYLLGTMAGGAADCSFWER.[L]	1xOxidation [M12]; 1xTMT6plex [N-Term]; 1xIA-DTB [C19]	P28074	PSB5_C111	3367.7	101.8	81.2	95.8	112.8	123.6	84.8
[K].VLFLLGADGGCITR.[Q]	1xTMT6plex [N-Term]; 1xIA-DTB [C11]	P28331	NDUS1_C554	2173.24	88.6	99.9	102.5	116	101.9	91.1
[R].DNCPLVANLVTASLR.[R]	1xTMT6plex [N-Term]; 1xIA-DTB [C3]	P28340	DPOD1_C837	2324.3	104.8	114.5	81	84.8	103.3	111.6
[R].LLIDRDPEGAVAHAQDVISDLLCNR.[I]	1xTMT6plex [N-Term]; 1xIA-DTB [C23]	P28340	DPOD1_C873	3471.86	105.6	78.4	81.9	110	105.1	119
[R].DLKPSNLLINTTCDLK.[I]	2xTMT6plex [K3; K16]; 1xTMT6plex [N-Term]; 1xIA-DTB [C13]	P28482	MK01_C161	2984.74	92.2	90.8	113.1	103.8	95.4	104.8
[R].LILADALCYAHTFNPK.[V]	1xTMT6plex [K16]; 1xTMT6plex [N-Term]; 1xIA-DTB [C8]	P28838	AMPL_C376	2757.55	119.3	90.8	97.1	99.3	97.5	96.2
[R].QVVDCQLADVNNIGK.[Y]	1xTMT6plex [K15]; 1xTMT6plex [N-Term]; 1xIA-DTB [C5]	P28838	AMPL_C445	2583.43	95.5	98.3	97.4	96.4	89.7	122.7
[K].FAGMPITLTVSTSSLNLMAADCK.[Q]	1xTMT6plex [K23]; 1xTMT6plex [N-Term]; 1xIA-DTB [C22]	P29353	SHC1_C248	3338.79	90.7	109.6	101.6	110.5	88.3	99.3
[K].CYASDQEVLDMHGFLR.[Q]	1xTMT6plex [N-Term]; 1xIA-DTB [C1]	P29590	PML_C338	2622.3	115.8	87.7	106.5	104.7	100.2	85.1
[R].LQDLSSCITQGK.[D]	1xTMT6plex [K12]; 1xTMT6plex [N-Term]; 1xIA-DTB [C7]	P29590	PML_C389	2260.27	90.3	130.3	102.7	97.4	91.5	87.8
[K].DINAYNCEEPTEKLPFPIIDDR.[N]	1xTMT6plex [K13]; 1xTMT6plex [N-Term]; 1xIA-DTB [C7]	P30041	PRDX6_C91	3559.85	134.5	78.2	85.4	115.4	108.7	77.9
[K].GVLFGVPGAFTPGCSK.[T]	1xTMT6plex [K16]; 1xTMT6plex [N-Term]; 1xIA-DTB [C14]	P30044	PRDX5_C100	2504.41	93.1	74	106	109.1	108.8	109.1
[K].KGVLFGVPGAFTPGCSK.[T]	2xTMT6plex [K1; K17]; 1xTMT6plex [N-Term]; 1xIA-DTB [C15]	P30044	PRDX5_C100	2861.67	67.2	79.6	113	113	110.6	116.6
[R].LCAAAASILGKPADR.[V]	1xTMT6plex [K11]; 1xTMT6plex [N-Term]; 1xIA-DTB [C2]	P30046	DOPD_C24	2424.42	102.7	85.1	73.2	132.5	132.1	74.4
[K].AFQYVETHGEVCPANWTPDSPTIKPSPAASK.[E]	2xTMT6plex [K24; K31]; 1xTMT6plex [N-Term]; 1xIA-DTB [C12]	P30048	PRDX3_C229	4525.38	100.2	93.5	115.5	94	87	109.8
[K].EILGTAQSVGCNVDGR.[H]	1xTMT6plex [N-Term]; 1xIA-DTB [C11]	P30050	RL12_C141	2357.24	126.7	82.1	72.9	128.1	128.4	61.8
[K].ALNALCDGLIDELNQALK.[T]	1xTMT6plex [K18]; 1xTMT6plex [N-Term]; 1xIA-DTB [C6]	P30084	ECHM_C62	2881.62	103.7	84.4	110.4	102.8	98.6	100.2
[R].YVWLVYEQDRPLKCDEPILSNR.[S]	1xTMT6plex [K13]; 1xTMT6plex [N-Term]; 1xIA-DTB [C14]	P30086	PEBP1_C133	3704	92.4	83.9	85.1	119.1	133.1	86.5
[R].APVAGTCYQAEWDDYVPK.[L]	1xTMT6plex [K18]; 1xTMT6plex [N-Term]; 1xIA-DTB [C7]	P30086	PEBP1_C168	2980.53	150.9	70.8	68.5	122.7	125.2	62.1
[R].ISDTGSAGLMLVEFFAPWCGHCK.[R]	1xCarbamidomethyl [C22]; 1xOxidation [M10]; 1xTMT6plex [K23]; 1xTMT6plex [N-Term]; 1xIA-DTB [C19]	P30101	PDIA3_C57	3509.78	102.5	145.6	70.3	53.9	103.4	124.3
[K].VKEFCENLSADCRENVIMSQILPCIK.[E]	2xCarbamidomethyl [C12; C24]; 2xTMT6plex [K2; K26]; 1xTMT6plex [N-Term]; 1xIA-DTB [C5]	P30153	2AAA_C310	4293.28	61.8	98.2	128.1	90.7	84.6	136.6
[K].VKEFCENLSADCR.[E]	1xCarbamidomethyl [C5]; 1xTMT6plex [K2]; 1xTMT6plex [N-Term]; 1xIA-DTB [C12]	P30153	2AAA_C317	2538.32	88.7	96.9	108.4	102.1	104.5	99.5
[K].DNTIEHLLPLFLAQLKDECPEVR.[L]	1xTMT6plex [K16]; 1xTMT6plex [N-Term]; 1xIA-DTB [C19]	P30153	2AAA_C377	3661.02	86.1	96.9	113.5	90.1	95.9	117.5
[K].ENTIEHLLPLFLAQLKDECPDVR.[L]	1xTMT6plex [K16]; 1xTMT6plex [N-Term]; 1xIA-DTB [C19]	P30154	2AAB_C389	3661.02	103.8	91.4	101.1	103.3	113.2	87.2
[K].DLTDMDKNSPEAWCAAGNCFSLQR.[E]	1xCarbamidomethyl [C14]; 1xTMT6plex [K7]; 1xTMT6plex [N-Term]; 1xIA-DTB [C19]	P30260	CDC27_C576	3696.8	87.5	102.7	115.3	88.2	96.3	110
[K].ALDINPQSSVLLCHIGVVQHALK.[K]	1xTMT6plex [K23]; 1xTMT6plex [N-Term]; 1xIA-DTB [C13]	P30260	CDC27_C673	3422.97	120.8	69.9	99.4	90.2	94.7	124.9
[R].KCPFYAAEQDK.[G]	2xTMT6plex [K1; K11]; 1xTMT6plex [N-Term]; 1xIA-DTB [C2]	P30519	HMOX2_C265	2496.39	110.1	116.5	92.7	93.4	95.2	92.1
[K].CPFYAAEQDK.[G]	1xTMT6plex [K10]; 1xTMT6plex [N-Term]; 1xIA-DTB [C1]	P30519	HMOX2_C265	2139.13	101.1	116	98.4	95.2	100.5	88.8
[R].CGWLDLVLLK.[Y]	1xTMT6plex [K10]; 1xTMT6plex [N-Term]; 1xIA-DTB [C1]	P30520	PURA2_C338	2127.28	104.6	96.9	68.2	131.9	125.6	72.8
[R].YASPEMCFVFSDR.[Y]	1xTMT6plex [N-Term]; 1xIA-DTB [C7]	P30566	PUR8_C27	2290.12	100.9	97.3	100.1	106.5	103	92.2
[R].DCQIAHGAAQFLR.[E]	1xTMT6plex [N-Term]; 1xIA-DTB [C2]	P30876	RPB2_C1093	2168.16	99.3	105.1	97.9	93.1	100.5	104.2
[R].SCLENSSRPTSTIWVSMLAR.[G]	1xTMT6plex [N-Term]; 1xIA-DTB [C2]	P30876	RPB2_C224	2976.56	65.1	109.5	108.4	96.5	91.8	128.6
[R].MTIGHLIECLQGK.[V]	1xTMT6plex [K13]; 1xTMT6plex [N-Term]; 1xIA-DTB [C9]	P30876	RPB2_C984	2410.37	86.9	86.9	112.4	83.7	103	127
[R].EFLFNAIETMPCVK.[K]	1xTMT6plex [K14]; 1xTMT6plex [N-Term]; 1xIA-DTB [C12]	P31350	RIR2_C202	2609.42	103.4	101.3	86.5	72.5	113.5	122.7
[K].AVELLGDIVQNCSLEDSQIEK.[E]	1xTMT6plex [K21]; 1xTMT6plex [N-Term]; 1xIA-DTB [C12]	P31930	QCR1_C154	3270.77	111	82	86.5	103.6	122.6	94.4
[K].HLGGIPWTYAEDAVPTLTPCR.[F]	1xTMT6plex [N-Term]; 1xIA-DTB [C20]	P31930	QCR1_C268	3035.6	100.2	96.9	92.5	96	115.5	98.9
[K].LPITVLNGAPGFINLCDALNAWQLVK.[E]	1xTMT6plex [K26]; 1xTMT6plex [N-Term]; 1xIA-DTB [C16]	P31939	PUR9_C241	3748.14	109.2	83.3	97.4	115.2	114.3	80.5
[R].GLPWSCSADEVQR.[F]	1xTMT6plex [N-Term]; 1xIA-DTB [C6]	P31943	HNRH1_C22	2186.12	114.6	78.4	91.9	123.3	111.5	80.2
[R].YGDGGSTFQSTTGHCVHMR.[G]	1xOxidation [M18]; 1xTMT6plex [N-Term]; 1xIA-DTB [C15]	P31943	HNRH1_C290	2795.32	110.7	80.7	89	111.6	112.6	95.4
[R].YGDGGSTFQSTTGHCVHMR.[G]	1xTMT6plex [N-Term]; 1xIA-DTB [C15]	P31943	HNRH1_C290	2779.32	106.5	85.8	101.9	108.9	103.5	93.5
[R].CIESLIAVFQK.[Y]	1xTMT6plex [K11]; 1xTMT6plex [N-Term]; 1xIA-DTB [C1]	P31949	S10AB_C13	2218.3	79	88.6	104.1	110.1	111.1	107.2
[R].FVCSPDEVMDTIDEGK.[S]	1xTMT6plex [K16]; 1xTMT6plex [N-Term]; 1xIA-DTB [C3]	P33176	KINH_C174	2752.39	85.9	92.2	115.9	106.2	87.2	112.6
[K].WAWEAVEALENHCR.[V]	1xTMT6plex [N-Term]; 1xIA-DTB [C13]	P33908	MA1A1_C579	2452.24	93.6	101.4	100.5	102.4	98.9	103.1
[R].DLVVPGSKPSGNDSCELR.[N]	1xTMT6plex [K8]; 1xTMT6plex [N-Term]; 1xIA-DTB [C15]	P33981	TTK_C322	2840.53	111.2	116.6	91.5	79.3	105	96.4
[K].TPSSNTLDDYMSCFR.[T]	1xTMT6plex [N-Term]; 1xIA-DTB [C13]	P33981	TTK_C465	2475.18	95.2	132.1	84.3	82.6	92.1	113.7
[K].LVIWGTDVNVAACK.[E]	1xTMT6plex [K14]; 1xTMT6plex [N-Term]; 1xIA-DTB [C13]	P33991	MCM4_C162	2456.41	119.5	93.2	82.5	113.8	110.9	80.1
[R].CSVLAAANSVFGR.[W]	1xTMT6plex [N-Term]; 1xIA-DTB [C1]	P33992	MCM5_C482	2033.12	91.8	111	104.1	96.8	93.6	102.6
[R].CSILAAANPAYGR.[Y]	1xTMT6plex [N-Term]; 1xIA-DTB [C1]	P33993	MCM7_C482	2045.12	88.5	95.1	83.5	120.7	116.7	95.4
[K].LDPQCWGVNVQPYSGSPANFAVYTALVEPHGR.[I]	1xTMT6plex [N-Term]; 1xIA-DTB [C5]	P34896	GLYC_C110	4211.13	109.1	116.2	88.4	100.1	79.8	106.4
[R].AVLEALGSCLNNK.[Y]	1xTMT6plex [K13]; 1xTMT6plex [N-Term]; 1xIA-DTB [C9]	P34896	GLYC_C68	2299.32	147.9	120.6	85.3	75.8	78.2	92.3
[R].GLELIASENFCSR.[A]	1xTMT6plex [N-Term]; 1xIA-DTB [C11]	P34897	GLYM_C80	2177.16	126.5	94.2	91.1	88.8	98.2	101.2
[R].SVMDATQIAGLNCLR.[L]	1xTMT6plex [N-Term]; 1xIA-DTB [C13]	P34932	HSP74_C167	2330.25	90.2	107.8	83.9	107.9	113	97.2
[K].LMSANASDLPLSIECFMNDVDVSGTMNR.[G]	1xTMT6plex [N-Term]; 1xIA-DTB [C15]	P34932	HSP74_C290	3768.83	76.1	80.7	140.5	103.7	85.5	113.4
[R].CTPACISFGPK.[N]	1xCarbamidomethyl [C5]; 1xTMT6plex [K11]; 1xTMT6plex [N-Term]; 1xIA-DTB [C1]	P34932	HSP74_C34	2148.17	75.9	114.5	101.2	97.9	104.6	105.9
[R].WNSPAEEGSSDCEVFSK.[N]	1xTMT6plex [K17]; 1xTMT6plex [N-Term]; 1xIA-DTB [C12]	P34932	HSP74_C417	2839.4	78.5	97.8	109.4	105.6	98.3	110.5
[R].VFPLSCAVQQYAWGK.[M]	1xTMT6plex [K15]; 1xTMT6plex [N-Term]; 1xIA-DTB [C6]	P34949	MPI_C11	2664.47	100.2	103.5	99.5	102.3	100	94.6
[K].GDCVECMACSDNTVR.[A]	2xCarbamidomethyl [C3; C6]; 1xTMT6plex [N-Term]; 1xIA-DTB [C9]	P34949	MPI_C289	2455.1	104.3	86.5	116.2	103.7	88.9	100.3
[K].FIDVPTLCEMLSYTPSSSK.[D]	1xTMT6plex [K19]; 1xTMT6plex [N-Term]; 1xIA-DTB [C8]	P34949	MPI_C309	3085.64	85.2	77.9	122.2	124.1	75.3	115.3
[R].DSLYVDGDCTMDIR.[T]	1xOxidation [M11]; 1xTMT6plex [N-Term]; 1xIA-DTB [C9]	P35080	PROF2_C84	2357.13	84.5	91.3	123.1	108.2	91.4	101.5
[K].GAELVEGCDGILGDNFRPTQPLSDR.[V]	1xTMT6plex [N-Term]; 1xIA-DTB [C8]	P35219	CAH8_C266	3397.74	110.2	84.4	117.7	94.9	101.9	90.8
[R].LESIISGAALMADSSCTR.[D]	1xTMT6plex [N-Term]; 1xIA-DTB [C16]	P35221	CTNA1_C324	2563.34	84.3	91.9	112.4	97.4	105.7	108.3
[R].FCADHPFLFFIQHSK.[T]	1xTMT6plex [K15]; 1xTMT6plex [N-Term]; 1xIA-DTB [C2]	P35237	SPB6_C350	2804.51	94.7	104.1	99.1	100.3	102.6	99.2
[K].TIIGQQGDQSCANK.[L]	1xTMT6plex [K14]; 1xTMT6plex [N-Term]; 1xIA-DTB [C11]	P35251	RFC1_C607	2430.32	83.3	102.8	102.3	95.2	96.8	119.6
[R].QVLHNLSMWCAR.[S]	1xTMT6plex [N-Term]; 1xIA-DTB [C10]	P35251	RFC1_C822	2196.17	94	104.8	97.6	96.3	98.1	109.2
[K].FTLDCTHPVEDGIMDAANFEQFLQER.[I]	1xTMT6plex [N-Term]; 1xIA-DTB [C5]	P35268	RL22_C25	3764.83	101.2	74.9	109.9	103.3	115	95.7
[R].ADGGGAGGAPASSSSSSVAAAAASGQCR.[G]	1xTMT6plex [N-Term]; 1xIA-DTB [C27]	P35453	HXD13_C40	3046.48	120.9	138.8	64.8	59.8	101.3	114.3
[R].VQELGLSAPLTVLPTITCGHTIEILR.[E]	1xTMT6plex [N-Term]; 1xIA-DTB [C18]	P35520	CBS_C431	3513.01	107.8	83	75.6	91	124.1	118.6
[K].KLEEEQIILEDQNCK.[L]	2xTMT6plex [K1; K15]; 1xTMT6plex [N-Term]; 1xIA-DTB [C14]	P35579	MYH9_C988	3028.7	117.6	82.3	75.1	126.3	125.2	73.6
[K].QGLETDNKELACEVK.[V]	2xTMT6plex [K8; K15]; 1xTMT6plex [N-Term]; 1xIA-DTB [C12]	P35580	MYH10_C1238	2873.6	92.5	90.9	85.4	125.6	117.2	88.5
[K].SASLDNGGCALTTFSVLEGEK.[N]	1xTMT6plex [K21]; 1xTMT6plex [N-Term]; 1xIA-DTB [C9]	P35610	SOAT1_C92	3066.62	98.2	97.4	93.1	113.8	107	90.5
[K].YSDVEVPASVTGYSFASDGDSGTCSPLR.[H]	1xTMT6plex [N-Term]; 1xIA-DTB [C24]	P35611	ADDA_C430	3605.73	63	97.6	131.8	103.9	92.5	111.2
[K].TAGPQSQVLCGVVMDR.[S]	1xTMT6plex [N-Term]; 1xIA-DTB [C10]	P35611	ADDA_C525	2399.27	82.7	104.7	109.1	101.9	94.5	107.1
[K].GSSCFPVDTTGFCLHSAIYAARPDVR.[C]	1xCarbamidomethyl [C4]; 1xTMT6plex [N-Term]; 1xIA-DTB [C13]	P35612	ADDB_C210	3565.79	105.8	94.4	124	86.9	82.7	106.3
[R].TSCKDDEAVVQAPR.[H]	1xTMT6plex [K4]; 1xTMT6plex [N-Term]; 1xIA-DTB [C3]	P35658	NU214_C1003	2486.34	84	102	101.1	104.5	113.8	94.7
[K].ACFQVGTSEEMK.[M]	1xTMT6plex [K12]; 1xTMT6plex [N-Term]; 1xIA-DTB [C2]	P35658	NU214_C728	2297.2	106.6	97.7	100.3	108.1	90.9	96.4
[K].VAVVNSLGLNNCR.[T]	1xTMT6plex [N-Term]; 1xIA-DTB [C12]	P35711	SOX5_C492	2097.18	105.3	107.6	73.7	105.1	110.5	97.8
[K].ACLIFFDEIDAIGGAR.[F]	1xTMT6plex [N-Term]; 1xIA-DTB [C2]	P35998	PRS7_C270	2449.31	121.1	110.1	83	86.2	100.9	98.6
[K].LSCVPVLIFANK.[Q]	1xTMT6plex [K12]; 1xTMT6plex [N-Term]; 1xIA-DTB [C3]	P36405	ARL3_C118	2271.37	106.6	92.6	89.8	110.7	114.9	85.5
[R].VWQIQSCSALTGEGVQDGMNWVCK.[N]	1xCarbamidomethyl [C7]; 1xTMT6plex [K24]; 1xTMT6plex [N-Term]; 1xIA-DTB [C23]	P36405	ARL3_C174	3663.85	94.1	104.9	103.3	99.6	98	100.1
[K].LCDFGVSGQLIDSMANSFVGTR.[S]	1xTMT6plex [N-Term]; 1xIA-DTB [C2]	P36507	MP2K2_C211	3055.55	67.5	90.8	111.4	104.1	130.8	95.4
[K].RSEVEEVDFAGWLCK.[T]	1xTMT6plex [K15]; 1xTMT6plex [N-Term]; 1xIA-DTB [C14]	P36507	MP2K2_C384	2735.46	95	102.7	102.6	92.3	102.2	105.1
[R].SEVEEVDFAGWLCK.[T]	1xTMT6plex [K14]; 1xTMT6plex [N-Term]; 1xIA-DTB [C13]	P36507	MP2K2_C384	2579.36	93.6	101.3	109.3	91.2	92.5	112
[K].EGGGGISCVLQDGCVFEK.[A]	1xCarbamidomethyl [C8]; 1xTMT6plex [K18]; 1xTMT6plex [N-Term]; 1xIA-DTB [C14]	P36551	HEM6_C198	2822.46	120.4	90.5	100.9	99.8	85.5	102.9
[R].KEGGGGISCVLQDGCVFEK.[A]	1xCarbamidomethyl [C9]; 2xTMT6plex [K1; K19]; 1xTMT6plex [N-Term]; 1xIA-DTB [C15]	P36551	HEM6_C198	3179.72	80.2	92.2	109.8	113.8	97	107
[R].YAICSALAASALPALVMSK.[G]	1xOxidation [M17]; 1xTMT6plex [K19]; 1xTMT6plex [N-Term]; 1xIA-DTB [C4]	P36578	RL4_C125	2863.62	90.3	102.6	90.7	106.1	108.2	102.1
[R].YAICSALAASALPALVMSK.[G]	1xTMT6plex [K19]; 1xTMT6plex [N-Term]; 1xIA-DTB [C4]	P36578	RL4_C125	2847.62	96.3	109.8	95.7	99.6	108.9	89.7
[R].RGPCIIYNEDNGIIK.[A]	1xTMT6plex [K15]; 1xTMT6plex [N-Term]; 1xIA-DTB [C4]	P36578	RL4_C208	2672.5	88.5	97.1	94.2	100.1	106.4	113.7
[R].GPCIIYNEDNGIIK.[A]	1xTMT6plex [K14]; 1xTMT6plex [N-Term]; 1xIA-DTB [C3]	P36578	RL4_C208	2516.39	126.2	92.3	87.8	95.5	97.1	101.2
[R].LVIGQNGILSTPAVSCIIR.[K]	1xTMT6plex [N-Term]; 1xIA-DTB [C16]	P36871	PGM1_C101	2692.57	130.4	79.2	73.5	105	126.4	85.4
[K].DGTVLCELINALYPEGQAPVK.[K]	1xTMT6plex [K21]; 1xTMT6plex [N-Term]; 1xIA-DTB [C6]	P37802	TAGL2_C63	3197.76	113.1	85	93	123	111.8	74.2
[R].AFQLEEGEETEPDCK.[Y]	1xTMT6plex [K15]; 1xTMT6plex [N-Term]; 1xIA-DTB [C14]	P38432	COIL_C126	2692.35	118	105.3	94.2	89.7	95.5	97.4
[K].MFFALGPVASVAFCTSPMAK.[L]	1xTMT6plex [K20]; 1xTMT6plex [N-Term]; 1xIA-DTB [C14]	P38571	LICH_C209	3042.64	90.7	110.9	85.4	92	109.7	111.2
[R].VLDALFPCVQGGTTAIPGAFGCGK.[T]	1xCarbamidomethyl [C8]; 1xTMT6plex [K24]; 1xTMT6plex [N-Term]; 1xIA-DTB [C22]	P38606	VATA_C254	3346.81	88.8	105.4	113.3	98.5	90.4	103.5
[K].AKCELSSSVQTDINLPYLTMDSSGPK.[H]	2xTMT6plex [K2; K26]; 1xTMT6plex [N-Term]; 1xIA-DTB [C3]	P38646	GRP75_C317	3981.13	141	105.4	68.7	88.2	116.7	80
[K].CELSSSVQTDINLPYLTMDSSGPK.[H]	1xTMT6plex [K24]; 1xTMT6plex [N-Term]; 1xIA-DTB [C1]	P38646	GRP75_C317	3552.83	100.2	111.4	67.9	104.5	127.3	88.7
[K].AKCELSSSVQTDINLPYLTMDSSGPK.[H]	1xOxidation [M20]; 2xTMT6plex [K2; K26]; 1xTMT6plex [N-Term]; 1xIA-DTB [C3]	P38646	GRP75_C317	3997.12	137.7	99.9	65.9	97.5	115.3	83.8
[K].GLLALGDYMNVQCHACIGGTNVGEDIR.[K]	1xCarbamidomethyl [C13]; 1xTMT6plex [N-Term]; 1xIA-DTB [C16]	P38919	IF4A3_C140	3614.81	117	95.7	101.5	91.6	103.4	90.8
[K].SLDLFNCEVTNLNDYRENVFK.[L]	1xTMT6plex [K21]; 1xTMT6plex [N-Term]; 1xIA-DTB [C7]	P39687	AN32A_C123	3500.82	88.9	83.1	92.9	134.1	119.8	81.3
[K].VYAAATEDMDCLTFGSPVLMR.[H]	1xTMT6plex [N-Term]; 1xIA-DTB [C11]	P39748	FEN1_C182	3028.51	101.9	77.4	92.1	86.1	115.2	127.4
[R].VTEAPCYPGAPSTEASGQTGPQEPTSAR.[A]	1xTMT6plex [N-Term]; 1xIA-DTB [C6]	P40222	TXLNA_C523	3527.73	93.7	87.4	84.6	112.1	129.7	92.4
[R].QLEDILSTYCVDNNQGGPGEDGAQGEPAEPEDAEK.[S]	1xTMT6plex [K35]; 1xTMT6plex [N-Term]; 1xIA-DTB [C10]	P40222	TXLNA_C87	4643.21	97.4	87.1	100.3	106.6	102.8	105.8
[K].NAIDDGCVVPGAGAVEVAMAEALIK.[H]	1xTMT6plex [K25]; 1xTMT6plex [N-Term]; 1xIA-DTB [C7]	P40227	TCPZ_C406	3380.83	63.8	104.1	123.7	113.3	78.8	116.2
[R].CYYSNTDAVIYVVDSCDRDR.[I]	1xCarbamidomethyl [C16]; 1xTMT6plex [N-Term]; 1xIA-DTB [C1]	P40616	ARL1_C80	3152.5	90	108.8	99.3	108.8	80.7	112.4
[R].QQIACIGGPPNICLDR.[L]	1xCarbamidomethyl [C5]; 1xTMT6plex [N-Term]; 1xIA-DTB [C13]	P40763	STAT3_C259	2493.33	109.8	101.7	88.8	96.2	117.6	85.9
[K].LLGPGVNYSGCQITWAK.[F]	1xTMT6plex [K17]; 1xTMT6plex [N-Term]; 1xIA-DTB [C11]	P40763	STAT3_C542	2774.54	95.8	91	86.1	92.7	114.2	120.2
[R].VGSDMTSQQEFTSCLK.[E]	1xTMT6plex [K16]; 1xTMT6plex [N-Term]; 1xIA-DTB [C14]	P40855	PEX19_C128	2728.41	84.8	93.8	119.5	99.7	94.5	107.8
[K].VIVVGNPANTNCLTASK.[S]	1xTMT6plex [K17]; 1xTMT6plex [N-Term]; 1xIA-DTB [C12]	P40925	MDHC_C137	2668.52	108.2	73.8	82.7	141	127.3	67
[K].EGVVECSFVK.[S]	1xTMT6plex [K10]; 1xTMT6plex [N-Term]; 1xIA-DTB [C6]	P40926	MDHM_C275	2064.16	110.8	82.9	86.7	123.1	120.1	76.4
[R].FCLICNYLSK.[I]	1xCarbamidomethyl [C5]; 1xTMT6plex [K10]; 1xTMT6plex [N-Term]; 1xIA-DTB [C2]	P40937	RFC5_C152	2228.23	100.9	117.5	66.4	81.5	119.8	113.9
[R].LYELLTHCIPPEIIMK.[G]	1xTMT6plex [K16]; 1xTMT6plex [N-Term]; 1xIA-DTB [C8]	P40938	RFC3_C285	2880.65	100.7	81	109.5	102.4	105.8	100.6
[K].ALMGLYHGQVLCK.[K]	1xTMT6plex [K13]; 1xTMT6plex [N-Term]; 1xIA-DTB [C12]	P40939	ECHA_C349	2400.37	128.5	79.5	89.2	103	107.9	92
[R].SCGSSTPDEFPTDIPGTK.[G]	1xTMT6plex [K18]; 1xTMT6plex [N-Term]; 1xIA-DTB [C2]	P41091	IF2G_C105	2806.43	82.8	91	81.4	96.2	133.1	115.5
[K].LMCKPIFSK.[I]	2xTMT6plex [K4; K9]; 1xTMT6plex [N-Term]; 1xIA-DTB [C3]	P41091	IF2G_C311	2263.36	112.6	104.5	67.6	108.8	118.3	88.3
[R].LPALLDEQQVNVLLYDMNGCYSR.[L]	1xTMT6plex [N-Term]; 1xIA-DTB [C20]	P41134	ID1_C72	3392.75	134.7	80.8	66.4	73.8	94	150.4
[K].GNSPPSSGEACREEK.[G]	1xTMT6plex [K15]; 1xTMT6plex [N-Term]; 1xIA-DTB [C11]	P41227	NAA10_C194	2515.3	119.5	82.1	82.8	112.2	121.5	81.9
[K].GNSPPSSGEACR.[E]	1xTMT6plex [N-Term]; 1xIA-DTB [C11]	P41227	NAA10_C194	1899.95	135.6	84	69.5	117	127.9	65.9
[R].SVLGGDCLLK.[F]	1xTMT6plex [K10]; 1xTMT6plex [N-Term]; 1xIA-DTB [C7]	P41240	CSK_C290	1972.17	85.1	103.3	122.2	97.4	86.7	105.2
[K].YNFHGTAEQDLPFCK.[G]	1xTMT6plex [K15]; 1xTMT6plex [N-Term]; 1xIA-DTB [C14]	P41240	CSK_C31	2737.42	135.2	69.4	84.6	96.4	94.1	120.3
[K].VMPFSTACNTPLSNFESHQNYK.[D]	1xTMT6plex [K22]; 1xTMT6plex [N-Term]; 1xIA-DTB [C8]	P41252	SYIC_C185	3482.76	117.2	80.8	85.9	106.9	112.3	96.9
[R].NNDLCYWVPELVR.[E]	1xTMT6plex [N-Term]; 1xIA-DTB [C5]	P41252	SYIC_C433	2359.24	58.4	94	102.2	132.8	123.1	89.4
[R].ISEVFDCWFESGSMPYAQVHYPFENKR.[E]	1xOxidation [M14]; 1xTMT6plex [K26]; 1xTMT6plex [N-Term]; 1xIA-DTB [C7]	P41252	SYIC_C526	4250.09	123.8	100	81.6	85.7	88.4	120.5
[R].ISEVFDCWFESGSMPYAQVHYPFENKR.[E]	1xTMT6plex [K26]; 1xTMT6plex [N-Term]; 1xIA-DTB [C7]	P41252	SYIC_C526	4234.09	109.9	99.8	95.2	88.8	91	115.3
[R].FGWDCHGLPVEYEIDKTLGIR.[G]	1xTMT6plex [K16]; 1xTMT6plex [N-Term]; 1xIA-DTB [C5]	P41252	SYIC_C87	3415.82	93.2	125.9	99	79.4	82.4	120.1
[R].FGWDCHGLPVEYEIDK.[T]	1xTMT6plex [K16]; 1xTMT6plex [N-Term]; 1xIA-DTB [C5]	P41252	SYIC_C87	2875.49	105.8	109	90.4	91.8	100.5	102.6
[K].NICQFLVEIGLAK.[D]	1xTMT6plex [K13]; 1xTMT6plex [N-Term]; 1xIA-DTB [C3]	P41567	EIF1_C94	2415.42	92	101.2	83.9	115.7	117.9	89.3
[R].GVILTSDRPGVFSAGLDLTEMCGR.[S]	1xTMT6plex [N-Term]; 1xIA-DTB [C22]	P42126	ECI1_C114	3232.7	125	88.4	82.8	100.1	101.6	102.1
[R].YCIGLNETQLGIIAPFWLK.[D]	1xTMT6plex [K19]; 1xTMT6plex [N-Term]; 1xIA-DTB [C2]	P42126	ECI1_C173	3146.78	101.3	97.6	76.1	124.5	129.6	70.8
[K].ETTTGYYKDIVENICGR.[E]	1xTMT6plex [K8]; 1xTMT6plex [N-Term]; 1xIA-DTB [C15]	P42166	LAP2A_C330	2929.55	106.3	123.1	93.5	90.5	81.8	104.7
[R].DILKEMFPYEASTPTGISASCR.[R]	1xTMT6plex [K4]; 1xTMT6plex [N-Term]; 1xIA-DTB [C21]	P42167	LAP2B_C363	3383.77	77.3	109.1	110.2	87	93.7	122.6
[K].EMFPYEASTPTGISASCR.[R]	1xOxidation [M2]; 1xTMT6plex [N-Term]; 1xIA-DTB [C17]	P42167	LAP2B_C363	2701.32	113.5	93.1	92.5	104	106.5	90.3
[R].DILKEMFPYEASTPTGISASCR.[R]	1xOxidation [M6]; 1xTMT6plex [K4]; 1xTMT6plex [N-Term]; 1xIA-DTB [C21]	P42167	LAP2B_C363	3399.77	74.4	113.7	110.7	103	87.2	110.9
[R].NLSFFLTPPCAR.[W]	1xTMT6plex [N-Term]; 1xIA-DTB [C10]	P42224	STAT1_C492	2104.16	76.4	121.1	117.3	102.4	82	100.8
[R].SILPSNLLTVCQEGTLK.[R]	1xTMT6plex [K17]; 1xTMT6plex [N-Term]; 1xIA-DTB [C11]	P42356	PI4KA_C246	2783.61	85.9	104.9	110.9	94.6	93.7	110
[K].LLQLQEVFQLFDNANCPSLQNKPK.[M]	2xTMT6plex [K22; K24]; 1xTMT6plex [N-Term]; 1xIA-DTB [C16]	P42575	CASP2_C305	3984.23	94.4	92.1	78.2	98.3	126.6	110.5
[K].MFFIQACR.[G]	1xTMT6plex [N-Term]; 1xIA-DTB [C7]	P42575	CASP2_C320	1753.94	93	125.6	91.4	90.2	99.4	100.5
[R].AQSLVAVVGDPIALCSIGR.[C]	1xTMT6plex [N-Term]; 1xIA-DTB [C15]	P42694	HELZ_C1055	2607.49	97.6	91.6	117.9	83.3	88.1	121.5
[R].GVVPVVMDCESTVQEK.[A]	1xTMT6plex [K16]; 1xTMT6plex [N-Term]; 1xIA-DTB [C9]	P42695	CNDD3_C631	2687.45	122.8	100.1	115.4	86.2	79.6	95.8
[R].LIASYCNVGDIEGASK.[I]	1xTMT6plex [K16]; 1xTMT6plex [N-Term]; 1xIA-DTB [C6]	P42704	LPPRC_C208	2607.42	113.7	80	79.1	130.7	105.1	91.4
[K].GDLSTALEVAIDCYEK.[Y]	1xTMT6plex [K16]; 1xTMT6plex [N-Term]; 1xIA-DTB [C13]	P42704	LPPRC_C848	2694.44	116.6	83.8	98	111.6	104.7	85.4
[R].IVGYFVSGCDPSIMGIGPVPAISGALK.[K]	1xTMT6plex [K27]; 1xTMT6plex [N-Term]; 1xIA-DTB [C9]	P42765	THIM_C287	3616	78	89.2	100.9	128.2	104.3	99.4
[R].LCGSGFQSIVNGCQEICVK.[E]	2xCarbamidomethyl [C13; C17]; 1xTMT6plex [K19]; 1xTMT6plex [N-Term]; 1xIA-DTB [C2]	P42765	THIM_C92	3066.59	81.4	109.8	122.1	94.5	86.7	105.4
[R].IQELSFSPYLISCTVINR.[L]	1xTMT6plex [N-Term]; 1xIA-DTB [C13]	P42858	HD_C1708	2821.55	109.9	97.1	100.9	91.4	100.9	99.8
[K].LWDFQGFECIR.[T]	1xTMT6plex [N-Term]; 1xIA-DTB [C9]	P43034	LIS1_C184	2152.12	93.4	89.2	96.2	109	118.1	94
[K].VMIDNETLPVEYLGGKPLCMNQYYQILSSCR.[V]	1xCarbamidomethyl [C30]; 1xTMT6plex [K16]; 1xTMT6plex [N-Term]; 1xIA-DTB [C19]	P43155	CACP_C169	4602.36	102.1	79.5	125.8	106.9	68.3	117.4
[R].EDAMAMVDHCLKK.[A]	2xTMT6plex [K12; K13]; 1xTMT6plex [N-Term]; 1xIA-DTB [C10]	P43243	MATR3_C552	2687.47	86.9	95.9	105	108.7	99.2	104.4
[R].KLGLCEFPDNDQFSNLEALLIQIGPK.[E]	2xTMT6plex [K1; K26]; 1xTMT6plex [N-Term]; 1xIA-DTB [C5]	P43246	MSH2_C176	4099.29	93.3	86	87.8	99.2	120.3	113.3
[K].KGVCDQSFGIHVAELANFPK.[H]	2xTMT6plex [K1; K20]; 1xTMT6plex [N-Term]; 1xIA-DTB [C4]	P43246	MSH2_C822	3356.88	100.6	107.7	104.3	80.1	93.7	113.6
[K].GVCDQSFGIHVAELANFPK.[H]	1xTMT6plex [K19]; 1xTMT6plex [N-Term]; 1xIA-DTB [C3]	P43246	MSH2_C822	2999.62	148	75.9	101.1	87	80.7	107.3
[R].LGAGMLEPPFKPDPQAIYCK.[D]	2xTMT6plex [K11; K20]; 1xTMT6plex [N-Term]; 1xIA-DTB [C19]	P43250	GRK6_C474	3371.88	103	105	105.7	88.2	93.4	104.7
[R].AWVWNTHADFADECPKPELLAIR.[F]	1xTMT6plex [K16]; 1xTMT6plex [N-Term]; 1xIA-DTB [C14]	P43487	RANG_C132	3649.94	109.6	86	116.9	96.9	94.4	96.2
[K].ICANHYITPMMELKPNAGSDR.[A]	1xTMT6plex [K14]; 1xTMT6plex [N-Term]; 1xIA-DTB [C2]	P43487	RANG_C99	3328.74	112.2	101.4	81.3	105.4	103.2	96.5
[K].DAFEHIVTQFSSVPVSVVSDSYDIYNACEK.[I]	1xTMT6plex [K30]; 1xTMT6plex [N-Term]; 1xIA-DTB [C28]	P43490	NAMPT_C287	4317.18	121.9	90.5	78.9	118.9	95.3	94.4
[K].WNTDNTLGTEIAIEDQICQGLK.[L]	1xTMT6plex [K22]; 1xTMT6plex [N-Term]; 1xIA-DTB [C18]	P45880	VDAC2_C103	3429.81	111.1	81.9	92.1	112.4	109.1	93.4
[K].SCSGVEFSTSGSSNTDTGKVTGTLETK.[Y]	2xTMT6plex [K19; K27]; 1xTMT6plex [N-Term]; 1xIA-DTB [C2]	P45880	VDAC2_C47	3877.01	73.6	99.9	103	105.5	113.8	104.2
[K].SCSGVEFSTSGSSNTDTGK.[V]	1xTMT6plex [K19]; 1xTMT6plex [N-Term]; 1xIA-DTB [C2]	P45880	VDAC2_C47	2818.39	86.8	93.5	89.6	129.6	113.9	86.6
[K].WCEYGLTFTEK.[W]	1xTMT6plex [K11]; 1xTMT6plex [N-Term]; 1xIA-DTB [C2]	P45880	VDAC2_C76	2344.24	116.7	90.8	76.3	124.1	119.6	72.5
[K].YKWCEYGLTFTEK.[W]	2xTMT6plex [K2; K13]; 1xTMT6plex [N-Term]; 1xIA-DTB [C4]	P45880	VDAC2_C76	2864.56	97	105.1	87.8	119.4	116.1	74.5
[K].VGSFCLSEAGAGSDSFALK.[T]	1xTMT6plex [K19]; 1xTMT6plex [N-Term]; 1xIA-DTB [C5]	P45954	ACDSB_C175	2813.49	98.2	81.9	113.3	99.4	114	93.3
[R].IGIAAQMLGLAQGCFDYTIPYIK.[E]	1xTMT6plex [K23]; 1xTMT6plex [N-Term]; 1xIA-DTB [C14]	P45954	ACDSB_C308	3453.9	105.4	101.9	82.8	116.2	109	84.7
[R].GLEPEKIIGATDSCGDLMFLMK.[W]	2xTMT6plex [K6; K22]; 1xTMT6plex [N-Term]; 1xIA-DTB [C14]	P45973	CBX5_C133	3564.94	91.6	105	128.1	79.7	85.2	110.4
[K].IIGATDSCGDLMFLMK.[W]	1xTMT6plex [K16]; 1xTMT6plex [N-Term]; 1xIA-DTB [C8]	P45973	CBX5_C133	2682.44	98	105	112.5	100.3	94.8	89.3
[R].SSDCPYIVQFYGALFR.[E]	1xTMT6plex [N-Term]; 1xIA-DTB [C4]	P45985	MP2K4_C158	2604.35	57.5	70	138.5	122.5	119	92.5
[K].LCDFGISGQLVDSIAK.[T]	1xTMT6plex [K16]; 1xTMT6plex [N-Term]; 1xIA-DTB [C2]	P45985	MP2K4_C246	2633.47	59.5	84.1	140.1	130.9	115.9	69.3
[K].MPCQSLQPEPINTPTHTK.[Q]	1xTMT6plex [K18]; 1xTMT6plex [N-Term]; 1xIA-DTB [C3]	P46013	KI67_C1007	2989.6	106.5	101.1	89.5	97.2	101.1	104.7
[R].KADVEGELLACR.[N]	1xTMT6plex [K1]; 1xTMT6plex [N-Term]; 1xIA-DTB [C11]	P46013	KI67_C1285	2271.29	81.9	106	108.6	101.5	100.4	101.6
[K].ELFQTPVCTDKPTTHEK.[T]	2xTMT6plex [K11; K17]; 1xTMT6plex [N-Term]; 1xIA-DTB [C8]	P46013	KI67_C1479	3170.75	102.4	97.5	98.4	93.4	106.8	101.5
[K].EQPQLTSTCHIAISNSENLLGK.[Q]	1xTMT6plex [K22]; 1xTMT6plex [N-Term]; 1xIA-DTB [C9]	P46013	KI67_C773	3350.81	142.5	89.7	90.3	90.9	86.5	100.2
[K].SEETNTEIVECILK.[R]	1xTMT6plex [K14]; 1xTMT6plex [N-Term]; 1xIA-DTB [C11]	P46013	KI67_C903	2575.41	95.1	105.1	99.6	102.8	101.1	96.5
[R].FQAAVQTTCDLMSLVTK.[A]	1xTMT6plex [K17]; 1xTMT6plex [N-Term]; 1xIA-DTB [C9]	P46020	KPB1_C697	2823.55	92.8	111.7	114.7	93.1	89	98.6
[K].ILAAALTECHRK.[S]	1xTMT6plex [K12]; 1xTMT6plex [N-Term]; 1xIA-DTB [C9]	P46060	RAGP1_C169	2293.36	75.6	98.3	87.8	89.8	117	131.5
[R].QVEVINFGDCLVR.[S]	1xTMT6plex [N-Term]; 1xIA-DTB [C10]	P46060	RAGP1_C274	2230.22	82.7	88.8	86.6	95.5	113.5	132.8
[K].LKELNLSFCEIKR.[D]	2xTMT6plex [K2; K12]; 1xTMT6plex [N-Term]; 1xIA-DTB [C9]	P46060	RAGP1_C303	2789.67	87.6	101.9	85.4	90.2	112	122.9
[K].LDLNGNTLGEEGCEQLQEVLEGFNMAK.[V]	1xTMT6plex [K27]; 1xTMT6plex [N-Term]; 1xIA-DTB [C13]	P46060	RAGP1_C338	3919	97.7	81.1	97.7	106.2	98.1	119.2
[K].ALAPLLLAFVTKPNSALESCSFAR.[H]	1xTMT6plex [K12]; 1xTMT6plex [N-Term]; 1xIA-DTB [C20]	P46060	RAGP1_C573	3486.99	104.8	96.1	103.8	93.9	98	103.3
[R].AESSQTCHSEQGDKK.[M]	2xTMT6plex [K14; K15]; 1xTMT6plex [N-Term]; 1xIA-DTB [C7]	P46063	RECQ1_C606	2831.49	141	78.2	106.9	92.9	83.9	97.1
[R].IILTGTPLQNNLIEYHCMVNFIK.[E]	1xTMT6plex [K23]; 1xTMT6plex [N-Term]; 1xIA-DTB [C17]	P46100	ATRX_C1760	3642.03	120.5	90.2	105.9	95.8	89.4	98.2
[K].KLDDSCSGSVTYSYSALIVPK.[E]	2xTMT6plex [K1; K21]; 1xTMT6plex [N-Term]; 1xIA-DTB [C6]	P46100	ATRX_C335	3429.89	115.8	100.4	88.7	102.2	97.3	95.7
[R].VPCAYDKTALALEVGDIVK.[V]	2xTMT6plex [K7; K19]; 1xTMT6plex [N-Term]; 1xIA-DTB [C3]	P46109	CRKL_C249	3201.85	88.4	118.6	101.9	90.3	84	116.8
[K].GILLYGPPGCGK.[T]	1xTMT6plex [K12]; 1xTMT6plex [N-Term]; 1xIA-DTB [C10]	P46459	NSF_C264	2142.25	125.1	84.4	91.2	96.4	111.1	91.8
[K].RNQSFCPTVNLDKLWTLVSEQTR.[V]	1xTMT6plex [K13]; 1xTMT6plex [N-Term]; 1xIA-DTB [C6]	P46776	RL27A_C70	3703.02	50.7	121.1	116.5	101.3	96.4	113.9
[R].NQSFCPTVNLDK.[L]	1xTMT6plex [K12]; 1xTMT6plex [N-Term]; 1xIA-DTB [C5]	P46776	RL27A_C70	2333.27	77.8	101.9	98.9	116.8	110.3	94.3
[K].RNQSFCPTVNLDK.[L]	1xTMT6plex [K13]; 1xTMT6plex [N-Term]; 1xIA-DTB [C6]	P46776	RL27A_C70	2489.37	83.7	102.9	101.7	113.9	104.3	93.4
[R].NQSFCPTVNLDKLWTLVSEQTR.[V]	1xTMT6plex [K12]; 1xTMT6plex [N-Term]; 1xIA-DTB [C5]	P46776	RL27A_C70	3546.91	63.3	113.4	127.8	95.8	85	114.7
[K].VGLTNYAAAYCTGLLLAR.[R]	1xTMT6plex [N-Term]; 1xIA-DTB [C11]	P46777	RL5_C100	2608.45	108.8	85.3	69.2	123.4	125.3	88
[R].RVNQAIWLLCTGAR.[E]	1xTMT6plex [N-Term]; 1xIA-DTB [C10]	P46782	RS5_C155	2339.33	110.3	95.9	75.9	127	115.1	75.7
[K].TIAECLADELINAAK.[G]	1xTMT6plex [K15]; 1xTMT6plex [N-Term]; 1xIA-DTB [C5]	P46782	RS5_C172	2542.43	99.4	84.2	89.5	123.3	118.2	85.4
[R].TPDTSTYCYETAEK.[I]	1xTMT6plex [K14]; 1xTMT6plex [N-Term]; 1xIA-DTB [C8]	P46821	MAP1B_C2041	2576.3	109.7	101.2	92.1	100.1	101.6	95.4
[R].SIEEACFTLQYLNK.[L]	1xTMT6plex [K14]; 1xTMT6plex [N-Term]; 1xIA-DTB [C6]	P46821	MAP1B_C382	2626.43	94	99.9	109.9	98.7	86.6	110.8
[R].HQLDEIICWLTK.[A]	1xTMT6plex [K12]; 1xTMT6plex [N-Term]; 1xIA-DTB [C8]	P46939	UTRN_C2098	2466.39	87.3	105.3	100.9	106.7	112	87.9
[K].QIPAITCIQSQWR.[G]	1xTMT6plex [N-Term]; 1xIA-DTB [C7]	P46940	IQGA1_C781	2282.26	128.8	97.2	88.5	93.7	106.9	85
[K].GCWDSIHVVEVQEK.[S]	1xTMT6plex [K14]; 1xTMT6plex [N-Term]; 1xIA-DTB [C2]	P47756	CAPZB_C147	2596.4	192.9	73.2	80.3	85.5	91.1	77.1
[R].QMEKDETVSDCSPHIANIGR.[L]	1xTMT6plex [K4]; 1xTMT6plex [N-Term]; 1xIA-DTB [C11]	P47756	CAPZB_C206	3197.64	104.8	86.6	89	107.1	107.4	105.2
[K].AFIHWVSQPLMCEVR.[L]	1xTMT6plex [N-Term]; 1xIA-DTB [C12]	P47897	SYQ_C687	2554.36	137	83.3	87.4	93.6	97.2	101.5
[R].KAPSGCGGGELALR.[C]	1xTMT6plex [K1]; 1xTMT6plex [N-Term]; 1xIA-DTB [C6]	P47928	ID4_C18	2283.3	124	130.1	75.6	67.6	96.9	105.8
[K].AWCVNCFACSTCNTK.[L]	3xCarbamidomethyl [C6; C9; C12]; 1xTMT6plex [K15]; 1xTMT6plex [N-Term]; 1xIA-DTB [C3]	P48059	LIMS1_C272	2789.34	113.7	99.6	97.2	97.1	92.8	99.6
[K].QNCFDDFQCAAEYLIK.[E]	1xCarbamidomethyl [C3]; 1xTMT6plex [K16]; 1xTMT6plex [N-Term]; 1xIA-DTB [C9]	P48147	PPCE_C532	2932.47	80.8	97	97.3	122.3	86.8	115.8
[K].YTIGHAWTTDYGCSDSK.[Q]	1xTMT6plex [K17]; 1xTMT6plex [N-Term]; 1xIA-DTB [C13]	P48147	PPCE_C601	2872.43	112.8	84.9	98.2	94.5	97.2	112.5
[K].CPSTHSEELHDCIQK.[T]	1xCarbamidomethyl [C12]; 1xTMT6plex [K15]; 1xTMT6plex [N-Term]; 1xIA-DTB [C1]	P48507	GSH0_C35	2751.4	132.9	74.6	104.8	101.8	90.4	95.4
[K].IAILTCPFEPPKPK.[T]	2xTMT6plex [K12; K14]; 1xTMT6plex [N-Term]; 1xIA-DTB [C6]	P48643	TCPE_C253	2750.66	85.3	102	111	103.1	94.8	103.8
[K].ETGANLAICQWGFDDEANHLLLQNNLPAVR.[W]	1xTMT6plex [N-Term]; 1xIA-DTB [C9]	P48643	TCPE_C302	4061.09	92	77.1	98.7	118.1	110.6	103.4
[K].EMNPALGIDCLHK.[G]	1xTMT6plex [K13]; 1xTMT6plex [N-Term]; 1xIA-DTB [C10]	P48643	TCPE_C493	2408.32	102.4	89.9	99.2	101.1	106.7	100.7
[K].SSGGFVWACK.[N]	1xTMT6plex [K10]; 1xTMT6plex [N-Term]; 1xIA-DTB [C9]	P48735	IDHP_C308	2009.1	77.3	116.7	100.5	105.5	96.3	103.7
[R].VVLPCSVQEYQVGQLYSVAEASK.[N]	1xTMT6plex [K23]; 1xTMT6plex [N-Term]; 1xIA-DTB [C5]	P48739	PIPNB_C13	3464.89	121.3	80.6	77.5	98.1	115.4	107.1
[K].ELANSPDCPQMCAYK.[L]	1xCarbamidomethyl [C12]; 1xTMT6plex [K15]; 1xTMT6plex [N-Term]; 1xIA-DTB [C8]	P48739	PIPNB_C187	2694.35	103.8	93.5	111.2	92.1	91.9	107.5
[K].ELANSPDCPQMCAYK.[L]	1xCarbamidomethyl [C12]; 1xOxidation [M11]; 1xTMT6plex [K15]; 1xTMT6plex [N-Term]; 1xIA-DTB [C8]	P48739	PIPNB_C187	2710.34	99.8	95	112.4	99.5	87.1	106.1
[R].EKPSNCAASTEK.[I]	2xTMT6plex [K2; K12]; 1xTMT6plex [N-Term]; 1xIA-DTB [C6]	P49116	NR2C2_C204	2461.37	108.7	97.8	87.8	105	109.2	91.5
[R].REPLGVCVGIGAWNYPFQIASWK.[S]	1xTMT6plex [K23]; 1xTMT6plex [N-Term]; 1xIA-DTB [C7]	P49189	AL9A1_C150	3558.94	98.5	78.2	80.5	130.8	116.6	95.4
[R].EPLGVCVGIGAWNYPFQIASWK.[S]	1xTMT6plex [K22]; 1xTMT6plex [N-Term]; 1xIA-DTB [C6]	P49189	AL9A1_C150	3402.84	137.8	90.8	79.2	117.3	97.7	77.2
[K].GALMANFLTQGQVCCNGTR.[V]	1xCarbamidomethyl [C15]; 1xOxidation [M4]; 1xTMT6plex [N-Term]; 1xIA-DTB [C14]	P49189	AL9A1_C288	2795.4	103.4	109.3	127.1	83	84.3	92.9
[K].KYGETANECGEAFFFYGK.[S]	2xTMT6plex [K1; K18]; 1xTMT6plex [N-Term]; 1xIA-DTB [C9]	P49321	NASP_C84	3257.69	104	89.2	91.1	115.7	111	89.1
[K].YGETANECGEAFFFYGK.[S]	1xTMT6plex [K17]; 1xTMT6plex [N-Term]; 1xIA-DTB [C8]	P49321	NASP_C84	2900.43	91	85.7	89.7	126.8	117.5	89.3
[K].FCFTPHTEEGCLSER.[A]	1xCarbamidomethyl [C11]; 1xTMT6plex [N-Term]; 1xIA-DTB [C2]	P49327	FAS_C1118	2551.23	89.5	91.8	102.2	118.3	89.1	109.3
[K].ACLDTAVENMPSLK.[M]	1xTMT6plex [K14]; 1xTMT6plex [N-Term]; 1xIA-DTB [C2]	P49327	FAS_C1227	2459.34	111.3	78.3	82.8	103.7	115.5	108.4
[K].AINCATSGVVGLVNCLR.[R]	1xCarbamidomethyl [C15]; 1xTMT6plex [N-Term]; 1xIA-DTB [C4]	P49327	FAS_C1448	2485.36	112.9	96.7	104.3	91.1	86.8	108.2
[R].HAQPTCPGAQLCTVYYASLNFR.[D]	1xCarbamidomethyl [C12]; 1xTMT6plex [N-Term]; 1xIA-DTB [C6]	P49327	FAS_C1558	3235.63	119.2	98.7	107.4	95.4	93	86.2
[K].CTVFHGAQVEDAFR.[Y]	1xTMT6plex [N-Term]; 1xIA-DTB [C1]	P49327	FAS_C1828	2318.19	105.8	87.1	79	103.1	120.1	104.9
[R].DGLLENQTPEFFQDVCKPK.[Y]	2xTMT6plex [K17; K19]; 1xTMT6plex [N-Term]; 1xIA-DTB [C16]	P49327	FAS_C1992	3404.85	81.9	84.9	99.7	89.5	109	135
[R].EACPELDYFVVFSSVSCGR.[G]	1xCarbamidomethyl [C3]; 1xTMT6plex [N-Term]; 1xIA-DTB [C17]	P49327	FAS_C2024	2903.43	101.9	80.4	105.3	92.7	108.3	111.4
[R].AAPLDSIHSLAAYYIDCIR.[Q]	1xTMT6plex [N-Term]; 1xIA-DTB [C17]	P49327	FAS_C2292	2830.51	157.2	74.2	75.3	88.3	97	108.1
[K].LTPGCEAEAETEAICFFVQQFTDMEHNR.[V]	1xCarbamidomethyl [C15]; 1xOxidation [M24]; 1xTMT6plex [N-Term]; 1xIA-DTB [C5]	P49327	FAS_C2359	4027.88	105	96.1	105.9	97.4	96	99.6
[R].AKLTPGCEAEAETEAICFFVQQFTDMEHNR.[V]	1xCarbamidomethyl [C17]; 1xTMT6plex [K2]; 1xTMT6plex [N-Term]; 1xIA-DTB [C7]	P49327	FAS_C2359	4440.18	124.6	104.7	113.6	77.2	70.8	109.1
[R].GGPEVQQVPAGERPLWFICSGMGTQWR.[G]	1xTMT6plex [N-Term]; 1xIA-DTB [C19]	P49327	FAS_C496	3724.9	147.1	89.1	100.5	100.4	90.6	72.2
[R].GLKPSCTIIPLMK.[K]	2xTMT6plex [K3; K13]; 1xTMT6plex [N-Term]; 1xIA-DTB [C6]	P49327	FAS_C779	2597.59	123.6	87	90.3	96.3	108.3	94.5
[R].ITSEQAMQDPYFLEDPLPTSDVFAGCQIPYPK.[R]	1xTMT6plex [K32]; 1xTMT6plex [N-Term]; 1xIA-DTB [C26]	P49336	CDK8_C349	4568.31	84.9	105.8	120.1	82.1	81.5	125.7
[R].WSSLACNIALDAVK.[M]	1xTMT6plex [K14]; 1xTMT6plex [N-Term]; 1xIA-DTB [C6]	P49368	TCPG_C173	2458.39	83.2	95.4	93	111.2	114.3	102.9
[K].IPGGIIEDSCVLR.[G]	1xTMT6plex [N-Term]; 1xIA-DTB [C10]	P49368	TCPG_C213	2110.19	109.2	81.8	96.7	101.3	108.8	102.1
[K].KIGDEYFTFITDCKDPK.[A]	3xTMT6plex [K1; K14; K17]; 1xTMT6plex [N-Term]; 1xIA-DTB [C13]	P49368	TCPG_C366	3445.92	106.5	87	96.6	92.7	112.1	105.1
[K].IGDEYFTFITDCKDPK.[A]	2xTMT6plex [K13; K16]; 1xTMT6plex [N-Term]; 1xIA-DTB [C12]	P49368	TCPG_C366	3088.66	84.6	102.9	101	94.2	101.8	115.5
[R].ELLTEFGYKGEETPVIVGSALCALEGRDPELGLK.[S]	2xTMT6plex [K9; K34]; 1xTMT6plex [N-Term]; 1xIA-DTB [C22]	P49411	EFTU_C222	4830.66	115.1	86.9	88.6	97.3	118.6	93.5
[K].KGDECELLGHSK.[N]	2xTMT6plex [K1; K12]; 1xTMT6plex [N-Term]; 1xIA-DTB [C5]	P49411	EFTU_C290	2512.42	90.6	109.6	87.7	98.6	116.2	97.4
[K].GSDCGIVNVNIPTSGAEIGGAFGGEK.[H]	1xTMT6plex [K26]; 1xTMT6plex [N-Term]; 1xIA-DTB [C4]	P49419	AL7A1_C478	3416.79	89	90.9	113.5	107	104.5	95.1
[K].AVYTQDCPLAAAK.[A]	1xTMT6plex [K13]; 1xTMT6plex [N-Term]; 1xIA-DTB [C7]	P49588	SYAC_C671	2318.29	100.9	99.3	92.8	102.9	118.3	85.7
[R].VQPQWSPPAGTQPCR.[L]	1xTMT6plex [N-Term]; 1xIA-DTB [C14]	P49589	SYCC_C27	2390.26	95.3	113	105.5	94.3	85.9	105.9
[R].RVQPQWSPPAGTQPCR.[L]	1xTMT6plex [N-Term]; 1xIA-DTB [C15]	P49589	SYCC_C27	2546.36	79.3	124	120.9	91.5	91.9	92.4
[K].ILDLVISCFK.[R]	1xTMT6plex [K10]; 1xTMT6plex [N-Term]; 1xIA-DTB [C8]	P49590	SYHM_C84	2118.28	101.2	74.5	79	124.8	123.2	97.5
[R].IEALGGFVSHMDCWR.[V]	1xTMT6plex [N-Term]; 1xIA-DTB [C13]	P49593	PPM1F_C315	2459.25	94.7	99.6	94.5	106	103.2	102
[K].EGLAESEPMICHTLPLPEGFQVVK.[V]	1xTMT6plex [K24]; 1xTMT6plex [N-Term]; 1xIA-DTB [C11]	P49711	CTCF_C155	3591.93	99.9	96.4	123.9	92.6	83.6	103.6
[R].ECERDYQDDTLELYNREDR.[F]	1xTMT6plex [N-Term]; 1xIA-DTB [C2]	P49750	YLPM1_C1230	3200.51	129.9	84.9	90	107	84.8	103.4
[K].TKGFEVYLAEMSADNQTCGK.[R]	2xTMT6plex [K2; K20]; 1xTMT6plex [N-Term]; 1xIA-DTB [C18]	P49750	YLPM1_C1967	3388.78	67.5	106.6	114.1	104.6	100	107.3
[K].GFEVYLAEMSADNQTCGK.[R]	1xTMT6plex [K18]; 1xTMT6plex [N-Term]; 1xIA-DTB [C16]	P49750	YLPM1_C1967	2930.48	123.7	82.4	97.2	108.7	96	92
[K].CGLVLSWK.[R]	1xTMT6plex [K8]; 1xTMT6plex [N-Term]; 1xIA-DTB [C1]	P49756	RBM25_C110	1873.11	89.6	103.1	80.4	115.5	129.8	81.5
[K].AKENDENCGPTTTVFVGNISEK.[A]	2xTMT6plex [K2; K22]; 1xTMT6plex [N-Term]; 1xIA-DTB [C8]	P49756	RBM25_C83	3549.88	102.3	90.3	106.1	109.7	101.7	89.7
[R].SHLNFSMLESPALHCQPSTSSAFPIGSSGFSLVK.[E]	1xTMT6plex [K34]; 1xTMT6plex [N-Term]; 1xIA-DTB [C15]	P49790	NU153_C148	4531.35	97.1	106.4	86.9	97.9	95	116.7
[K].TPPEDCEGPFRPAEILK.[E]	1xTMT6plex [K17]; 1xTMT6plex [N-Term]; 1xIA-DTB [C6]	P49790	NU153_C593	2866.55	91	111.9	101.8	104.3	94.1	96.9
[K].LKEQLLDCEGEDGWNK.[L]	2xTMT6plex [K2; K16]; 1xTMT6plex [N-Term]; 1xIA-DTB [C8]	P49792	RBP2_C141	3073.66	101.7	86.4	107.7	111.1	105.8	87.3
[R].SSLEWNSCVVQTLK.[E]	1xTMT6plex [K14]; 1xTMT6plex [N-Term]; 1xIA-DTB [C8]	P49792	RBP2_C206	2561.42	97.7	97.7	98.9	108.8	108	88.8
[R].VWLWTACDFADGER.[K]	1xTMT6plex [N-Term]; 1xIA-DTB [C7]	P49792	RBP2_C2407	2407.21	98.5	110.2	100.4	99.4	98.2	93.1
[K].LKLPPTFFCYK.[N]	2xTMT6plex [K2; K11]; 1xTMT6plex [N-Term]; 1xIA-DTB [C9]	P49792	RBP2_C2659	2553.52	105.5	107.2	88.5	109.7	101.2	87.8
[K].SQTEEITSTTDSVYTGGTEVMVPSFCK.[S]	1xTMT6plex [K27]; 1xTMT6plex [N-Term]; 1xIA-DTB [C26]	P49792	RBP2_C2791	3864.93	95.9	87.4	97	121.3	94.1	104.2
[K].ETNPVVFFDVCADGEPLGR.[I]	1xTMT6plex [N-Term]; 1xIA-DTB [C11]	P49792	RBP2_C3071	2803.43	80.1	102.5	125.5	108.3	96.3	87.3
[K].GEAGQNLLEMMACDR.[L]	1xTMT6plex [N-Term]; 1xIA-DTB [C13]	P49792	RBP2_C348	2376.17	106.6	98.5	119.1	88.1	85	102.7
[K].AHWLSIEGCQPAIPENPPPAPK.[E]	1xTMT6plex [K22]; 1xTMT6plex [N-Term]; 1xIA-DTB [C9]	P49848	TAF6_C141	3319.8	50	125.2	100.2	112.6	122.7	89.4
[K].EITEACVGSCEAK.[R]	1xCarbamidomethyl [C6]; 1xTMT6plex [K13]; 1xTMT6plex [N-Term]; 1xIA-DTB [C10]	P49848	TAF6_C235	2364.23	119.4	92.3	107.1	97.9	87.8	95.4
[K].ACTTEEDQEKLMQITSLHSLNAFLLPIK.[T]	2xTMT6plex [K10; K28]; 1xTMT6plex [N-Term]; 1xIA-DTB [C2]	P49915	GUAA_C489	4370.41	110.6	81.8	109.6	88.5	85.8	123.7
[K].ACTTEEDQEK.[L]	1xTMT6plex [K10]; 1xTMT6plex [N-Term]; 1xIA-DTB [C2]	P49915	GUAA_C489	2121.09	111.1	86.3	101.8	104.7	103.1	93
[R].LGPEVASLAMDSLCR.[G]	1xTMT6plex [N-Term]; 1xIA-DTB [C14]	P50336	PPOX_C167	2300.23	87.6	112.5	118.1	84	81.4	116.5
[R].ELVEAECGGANPLMK.[L]	1xTMT6plex [K15]; 1xTMT6plex [N-Term]; 1xIA-DTB [C7]	P50542	PEX5_C11	2528.36	102.8	89.1	113.2	93	93	108.9
[K].LQDAFSSIGQSCHLDLPQIAVVGGQSAGK.[S]	1xTMT6plex [K29]; 1xTMT6plex [N-Term]; 1xIA-DTB [C12]	P50570	DYN2_C27	3894.09	124	76.7	120.9	86.9	94.5	97
[R].TLLGSHGQELLIEGTSLVCMK.[S]	1xTMT6plex [K21]; 1xTMT6plex [N-Term]; 1xIA-DTB [C19]	P50851	LRBA_C1843	3196.78	88.7	91.9	117.1	98.8	94.9	108.7
[K].CMQLTDFILK.[F]	1xTMT6plex [K10]; 1xTMT6plex [N-Term]; 1xIA-DTB [C1]	P50914	RL14_C54	2179.24	76.3	105.8	101.2	106.5	93.3	116.9
[R].IGLSVSEVIEGYEIACR.[K]	1xTMT6plex [N-Term]; 1xIA-DTB [C16]	P50990	TCPQ_C136	2576.4	93.6	86.5	109.8	108.6	99.4	102.1
[K].IAVYSCPFDGMITETK.[G]	1xOxidation [M11]; 1xTMT6plex [K16]; 1xTMT6plex [N-Term]; 1xIA-DTB [C6]	P50990	TCPQ_C244	2758.46	91.5	89.9	117.5	101.4	90.1	109.6
[K].IAVYSCPFDGMITETK.[G]	1xTMT6plex [K16]; 1xTMT6plex [N-Term]; 1xIA-DTB [C6]	P50990	TCPQ_C244	2742.46	90.2	93	119.2	99.2	90.5	107.9
[K].AQDIEAGDGTTSVVIIAGSLLDSCTK.[L]	1xTMT6plex [K26]; 1xTMT6plex [N-Term]; 1xIA-DTB [C24]	P50991	TCPD_C120	3531.9	99.2	80.4	89.2	95.3	127.9	107.9
[K].KLGGTIDDCELVEGLVLTQK.[V]	2xTMT6plex [K1; K20]; 1xTMT6plex [N-Term]; 1xIA-DTB [C9]	P50991	TCPD_C221	3327.92	89.1	77.3	91.9	103.9	115.3	122.5
[K].LGGTIDDCELVEGLVLTQK.[V]	1xTMT6plex [K19]; 1xTMT6plex [N-Term]; 1xIA-DTB [C8]	P50991	TCPD_C221	2970.66	92.8	89.4	109.7	90.8	110.6	106.6
[K].IGLIQFCLSAPK.[T]	1xTMT6plex [K12]; 1xTMT6plex [N-Term]; 1xIA-DTB [C7]	P50991	TCPD_C252	2257.35	89.7	101.5	103.1	102.7	100.6	102.5
[K].GVGTDEACLIEILASR.[S]	1xTMT6plex [N-Term]; 1xIA-DTB [C8]	P50995	ANX11_C294	2385.3	128.8	80.5	87.1	100	108.1	95.5
[R].ANDQEPCGWWLAK.[V]	1xTMT6plex [K13]; 1xTMT6plex [N-Term]; 1xIA-DTB [C7]	P51114	FXR1_C77	2485.31	85.3	103.2	93.2	115.1	113.5	89.8
[R].IYGETPEACR.[Q]	1xTMT6plex [N-Term]; 1xIA-DTB [C9]	P51116	FXR2_C282	1876.98	85.9	94.9	102.7	111.4	103	102.1
[R].ANEQEPCGWWLAR.[V]	1xTMT6plex [N-Term]; 1xIA-DTB [C7]	P51116	FXR2_C87	2298.17	125.1	93.6	75.5	111.4	108.4	86.1
[R].GADCCVLVFDVTAPNTFK.[T]	1xCarbamidomethyl [C5]; 1xTMT6plex [K18]; 1xTMT6plex [N-Term]; 1xIA-DTB [C4]	P51149	RAB7A_C83	2924.54	113.7	98.2	95.9	108.1	102	82.2
[K].LILLGCVPSLNCYPPLEK.[L]	1xCarbamidomethyl [C12]; 1xTMT6plex [K18]; 1xTMT6plex [N-Term]; 1xIA-DTB [C6]	P51530	DNA2_C1016	2996.71	108.8	83.3	104.1	94	99.1	110.7
[K].IVCDGQYLHNFQCK.[H]	1xCarbamidomethyl [C13]; 1xTMT6plex [K14]; 1xTMT6plex [N-Term]; 1xIA-DTB [C3]	P51530	DNA2_C492	2692.41	118	109.5	108	91	80.5	93
[K].SCSTFEQWFNAPFAMTGEK.[V]	1xTMT6plex [K19]; 1xTMT6plex [N-Term]; 1xIA-DTB [C2]	P51532	SMCA4_C936	3148.56	86.5	112.2	100	98.4	99.3	103.5
[R].AQVCQQAEHSFAGMPCGIMDQFISLMGQK.[G]	1xCarbamidomethyl [C4]; 1xTMT6plex [K29]; 1xTMT6plex [N-Term]; 1xIA-DTB [C16]	P51570	GALK1_C182	4180.07	92.6	88.7	124.5	86.3	97.8	110.2
[K].CYADTMFSLLGK.[K]	1xTMT6plex [K12]; 1xTMT6plex [N-Term]; 1xIA-DTB [C1]	P51580	TPMT_C165	2316.25	90.4	104.7	96.8	107.9	110.3	89.9
[K].TCLPGFPGAPCAIK.[I]	1xCarbamidomethyl [C11]; 1xTMT6plex [K14]; 1xTMT6plex [N-Term]; 1xIA-DTB [C2]	P51610	HCFC1_C1886	2399.33	111	114.6	84	98	97.5	94.9
[R].EKDILTAIAADLCK.[S]	2xTMT6plex [K2; K14]; 1xTMT6plex [N-Term]; 1xIA-DTB [C13]	P51648	AL3A2_C50	2700.59	68	79.6	110.3	115.6	124	102.5
[R].WLPAAATFPVQDPASGAALGMVADCGVR.[E]	1xTMT6plex [N-Term]; 1xIA-DTB [C25]	P51649	SSDH_C93	3509.82	102.1	103.4	85.1	97	108.6	103.8
[K].FIYEGSSDFSCLPTFGVIIGQK.[S]	1xTMT6plex [K22]; 1xTMT6plex [N-Term]; 1xIA-DTB [C11]	P51659	DHB4_C373	3375.81	94.5	87.3	97.3	99.5	117.8	103.7
[R].YCPNSVLVIIDVKPK.[D]	2xTMT6plex [K13; K15]; 1xTMT6plex [N-Term]; 1xIA-DTB [C2]	P51665	PSMD7_C116	2884.73	90.5	103.9	93.9	113.3	109.6	88.9
[K].RYCPNSVLVIIDVKPK.[D]	2xTMT6plex [K14; K16]; 1xTMT6plex [N-Term]; 1xIA-DTB [C3]	P51665	PSMD7_C116	3040.83	92	106.5	90.8	116.5	112.5	81.8
[R].VCFAQHTPSLPAESPRPLK.[L]	1xTMT6plex [K19]; 1xTMT6plex [N-Term]; 1xIA-DTB [C2]	P51790	CLCN3_C733	3045.71	94.9	100.4	102.2	95	100	107.4
[K].SCVEEPEPEPEAAEGDGDKK.[G]	2xTMT6plex [K19; K20]; 1xTMT6plex [N-Term]; 1xIA-DTB [C2]	P51858	HDGF_C108	3312.69	88.9	84.4	93.9	124.8	121.5	86.6
[R].TCLSQLLDIMK.[S]	1xTMT6plex [K11]; 1xTMT6plex [N-Term]; 1xIA-DTB [C2]	P51946	CCNH_C244	2232.29	77.2	105.2	108.9	91.2	98.8	118.6
[R].GFGFVTYSCVEEVDAAMCARPHK.[V]	1xCarbamidomethyl [C18]; 1xOxidation [M17]; 1xTMT6plex [K23]; 1xTMT6plex [N-Term]; 1xIA-DTB [C9]	P51991	ROA3_C85	3557.77	114.2	83.2	92.8	107.9	104.6	97.4
[R].AVSTGVQAGIPMPCFTTALSFYDGYR.[H]	1xTMT6plex [N-Term]; 1xIA-DTB [C14]	P52209	6PGD_C422	3490.77	124.6	92.7	68.9	110.3	115.5	88
[R].GCAVVEFK.[M]	1xTMT6plex [K8]; 1xTMT6plex [N-Term]; 1xIA-DTB [C2]	P52272	HNRPM_C114	1820.05	117	92.6	93.1	104.6	102.9	89.7
[K].FNECGHVLYADIK.[M]	1xTMT6plex [K13]; 1xTMT6plex [N-Term]; 1xIA-DTB [C4]	P52272	HNRPM_C676	2476.34	74.4	101.8	110.9	105.6	98.5	108.9
[K].DKFNECGHVLYADIK.[M]	2xTMT6plex [K2; K15]; 1xTMT6plex [N-Term]; 1xIA-DTB [C6]	P52272	HNRPM_C676	2948.63	79.5	96.1	117.9	102.2	90.9	113.3
[K].GCGVVKFESPEVAER.[A]	1xTMT6plex [K6]; 1xTMT6plex [N-Term]; 1xIA-DTB [C2]	P52272	HNRPM_C694	2574.41	76.2	90.1	133	94.8	84.1	121.8
[R].TDCSPIQFESAWALTNIASGTSEQTK.[A]	1xTMT6plex [K26]; 1xTMT6plex [N-Term]; 1xIA-DTB [C3]	P52292	IMA1_C133	3752.92	75.7	110.5	83.9	100.7	114.3	114.9
[K].YGAVDPLLALLAVPDMSSLACGYLR.[N]	1xTMT6plex [N-Term]; 1xIA-DTB [C21]	P52292	IMA1_C223	3346.81	108.6	97	105.4	101	101.8	86.3
[R].NITWTLSNLCR.[N]	1xTMT6plex [N-Term]; 1xIA-DTB [C10]	P52292	IMA1_C237	2059.13	85.8	104.4	78.8	111.4	120.3	99.3
[R].DYVLDCNILPPLLQLFSK.[Q]	1xTMT6plex [K18]; 1xTMT6plex [N-Term]; 1xIA-DTB [C6]	P52294	IMA5_C210	3058.74	102.1	84.6	111.4	83.2	111	107.8
[K].ITAVDKTEDSLEGCLDCLLQALAQNNTETSEK.[I]	1xCarbamidomethyl [C14]; 2xTMT6plex [K6; K32]; 1xTMT6plex [N-Term]; 1xIA-DTB [C17]	P52306	GDS1_C29	4706.45	64.5	118.8	117.3	97.3	101.8	100.3
[K].ACISIGNQNFEVKADDLEPIMELGR.[G]	1xTMT6plex [K13]; 1xTMT6plex [N-Term]; 1xIA-DTB [C2]	P52564	MP2K6_C38	3729.97	89.6	99	95.1	98.2	105.5	112.5
[K].ACISIGNQNFEVK.[A]	1xTMT6plex [K13]; 1xTMT6plex [N-Term]; 1xIA-DTB [C2]	P52564	MP2K6_C38	2390.33	127.2	88.8	90.9	108.5	100.5	84
[R].GLPWSCSVEDVQNFLSDCTIHDGAAGVHFIYTR.[E]	1xCarbamidomethyl [C18]; 1xTMT6plex [N-Term]; 1xIA-DTB [C6]	P52597	HNRPF_C22	4433.16	164.1	56.5	67.3	112.6	145.6	53.9
[K].TFFGDDFIPNDILIGCEEEEQENGK.[A]	1xTMT6plex [K25]; 1xTMT6plex [N-Term]; 1xIA-DTB [C16]	P52701	MSH6_C1117	3826.89	63.1	75.9	105.5	135.7	89.1	130.7
[R].QAGLLAVMAQMGCYVPAEVCR.[L]	1xCarbamidomethyl [C13]; 1xTMT6plex [N-Term]; 1xIA-DTB [C20]	P52701	MSH6_C1165	3005.54	92.1	110.9	91.3	82.5	98.6	124.6
[R].SVAPAAPTSCDFSPGDLVWAK.[M]	1xTMT6plex [K21]; 1xTMT6plex [N-Term]; 1xIA-DTB [C10]	P52701	MSH6_C88	3086.64	82.6	97.6	118.5	98.8	90.2	112.2
[K].KLPLGFTFSFPCHQTK.[L]	2xTMT6plex [K1; K16]; 1xTMT6plex [N-Term]; 1xIA-DTB [C12]	P52789	HXK2_C158	3047.75	138	80.6	97.3	89.5	95.8	98.9
[K].MLPTYVCATPDGTEKGDFLALDLGGTNFR.[V]	1xTMT6plex [K15]; 1xTMT6plex [N-Term]; 1xIA-DTB [C7]	P52789	HXK2_C517	4070.11	82	91	126.5	96.8	84.4	119.2
[K].MLPTYVCATPDGTEK.[G]	1xTMT6plex [K15]; 1xTMT6plex [N-Term]; 1xIA-DTB [C7]	P52789	HXK2_C517	2593.38	87.3	87.9	118.2	106.1	91.6	108.8
[K].ASGCEGEDVVTLLK.[E]	1xTMT6plex [K14]; 1xTMT6plex [N-Term]; 1xIA-DTB [C4]	P52789	HXK2_C628	2388.32	97	82.4	107	95.9	106.5	111.3
[K].FLSQIESDCLALLQVR.[A]	1xTMT6plex [N-Term]; 1xIA-DTB [C9]	P52789	HXK2_C794	2573.43	83.9	106.8	103.8	101.9	100.7	102.9
[R].AILQHLGLESTCDDSIIVK.[E]	1xTMT6plex [K19]; 1xTMT6plex [N-Term]; 1xIA-DTB [C12]	P52789	HXK2_C813	3022.7	120.3	81	96	101.5	100.1	101.1
[K].GAALITAVACR.[I]	1xTMT6plex [N-Term]; 1xIA-DTB [C10]	P52789	HXK2_C909	1784.04	116.4	87.7	97.9	91.8	108.2	98.1
[R].WLSCTATPQIEEEVSLTQK.[N]	1xTMT6plex [K19]; 1xTMT6plex [N-Term]; 1xIA-DTB [C4]	P52948	NUP98_C1312	3130.69	79	107.9	119.6	103.8	84.3	105.4
[R].LEATLAPSSCMLAAFKPEAYAGPEAAAPGLPELR.[A]	1xTMT6plex [K16]; 1xTMT6plex [N-Term]; 1xIA-DTB [C10]	P52952	NKX25_C46	4410.36	98.1	121.9	97.6	86.9	84.7	110.7
[K].MTVCLETEK.[K]	1xTMT6plex [K9]; 1xTMT6plex [N-Term]; 1xIA-DTB [C4]	P53004	BIEA_C204	2021.12	82.8	100.7	101.1	99.7	106.9	108.8
[K].TLCGTPNYIAPEVLSK.[K]	1xTMT6plex [K16]; 1xTMT6plex [N-Term]; 1xIA-DTB [C3]	P53350	PLK1_C212	2673.51	94	106.3	87.4	78.1	108	126.1
[K].LILCPLMAAVTYIDEKR.[D]	1xTMT6plex [K16]; 1xTMT6plex [N-Term]; 1xIA-DTB [C4]	P53350	PLK1_C544	2916.68	240.3	71.2	64	57.4	80.7	86.4
[K].VKLPIIGVVENMSGFICPK.[C]	2xTMT6plex [K2; K19]; 1xTMT6plex [N-Term]; 1xIA-DTB [C17]	P53384	NUBP1_C235	3240.92	92.8	124.4	97.7	82.4	102	100.8
[K].NCDKGQSFFIDAPDSPATLAYR.[S]	1xTMT6plex [K4]; 1xTMT6plex [N-Term]; 1xIA-DTB [C2]	P53384	NUBP1_C277	3383.75	43	107.6	136.1	128	111.5	73.8
[K].GVTIIGPATVGGIKPGCFK.[I]	2xTMT6plex [K14; K19]; 1xTMT6plex [N-Term]; 1xIA-DTB [C17]	P53396	ACLY_C633	3011.8	117.3	88.6	92.8	104.1	103.4	93.8
[R].KPASFMTSICDER.[G]	1xTMT6plex [K1]; 1xTMT6plex [N-Term]; 1xIA-DTB [C10]	P53396	ACLY_C845	2452.31	113.9	88.8	103.7	96.2	97.2	100.2
[K].LGIQGSYFCSQECFK.[G]	1xCarbamidomethyl [C13]; 1xTMT6plex [K15]; 1xTMT6plex [N-Term]; 1xIA-DTB [C9]	P53582	MAP11_C36	2734.41	77	95.5	110.9	97.6	88.9	130.2
[K].IICQGFTGK.[Q]	1xTMT6plex [K9]; 1xTMT6plex [N-Term]; 1xIA-DTB [C3]	P53597	SUCA_C60	1934.13	91.1	106.8	104.1	105	98.2	94.9
[R].DGDPLPSSLSCK.[V]	1xTMT6plex [K12]; 1xTMT6plex [N-Term]; 1xIA-DTB [C11]	P53602	MVD1_C108	2186.19	93	107.9	118.7	104	76.7	99.7
[K].YIIVTQVGPGPQILDDPCAHLLGPDGLPKPAA.[-]	1xTMT6plex [K29]; 1xTMT6plex [N-Term]; 1xIA-DTB [C18]	P53602	MVD1_C386	4233.35	87.2	88	125.5	96.9	86.5	116
[K].KDDYEYCMSEYLR.[M]	1xTMT6plex [K1]; 1xTMT6plex [N-Term]; 1xIA-DTB [C7]	P53611	PGTB2_C40	2682.33	79.6	110.3	107.2	107.6	92.3	102.9
[R].CIYNLLQSSSPAVK.[Y]	1xTMT6plex [K14]; 1xTMT6plex [N-Term]; 1xIA-DTB [C1]	P53618	COPB_C248	2490.42	88.8	101.6	80.8	112.6	118.8	97.5
[K].AAAQCYIDLIIK.[E]	1xTMT6plex [K12]; 1xTMT6plex [N-Term]; 1xIA-DTB [C5]	P53618	COPB_C284	2289.34	112.8	85.3	91.1	94	120.4	96.4
[K].NEMNCKEDQFQLSLLAAMGNTQR.[K]	1xTMT6plex [K6]; 1xTMT6plex [N-Term]; 1xIA-DTB [C5]	P53618	COPB_C684	3608.84	62.2	105.2	110.6	100.2	78.2	143.6
[K].ALSGYCGFMAANLYAR.[S]	1xTMT6plex [N-Term]; 1xIA-DTB [C6]	P53618	COPB_C888	2446.26	105.9	88.2	103.4	95.5	93.8	113.2
[K].VQVPNCDEIFYAGTGNLLLR.[D]	1xTMT6plex [N-Term]; 1xIA-DTB [C6]	P53621	COPA_C453	2960.59	94.9	109.2	103.5	111.8	85.2	95.5
[K].GTSPTQIWCNNSQLPVDHILAGSFETAMR.[L]	1xTMT6plex [N-Term]; 1xIA-DTB [C9]	P53621	COPA_C921	3911.97	138.3	76	99.8	93.3	86.8	105.8
[R].TTYQALPCLPSMYGYPNR.[N]	1xTMT6plex [N-Term]; 1xIA-DTB [C8]	P53621	COPA_C975	2813.43	87	94.2	96.5	104.4	93.1	124.8
[K].WEALHAAECPCGPSLIR.[F]	1xCarbamidomethyl [C9]; 1xTMT6plex [N-Term]; 1xIA-DTB [C11]	P53701	CCHL_C178	2648.36	104.2	83.6	86.5	118.3	114.7	92.7
[K].GCPVNTEPSGPTCEKK.[T]	1xCarbamidomethyl [C13]; 2xTMT6plex [K15; K16]; 1xTMT6plex [N-Term]; 1xIA-DTB [C2]	P53701	CCHL_C35	2900.56	93.7	81.8	86.4	79.6	77.4	181
[K].GCPVNTEPSGPTCEK.[K]	1xCarbamidomethyl [C2]; 1xTMT6plex [K15]; 1xTMT6plex [N-Term]; 1xIA-DTB [C13]	P53701	CCHL_C46	2543.3	125.4	89.1	97.8	98.9	99.8	89
[K].VIEQLGTPCPEFMK.[K]	1xTMT6plex [K14]; 1xTMT6plex [N-Term]; 1xIA-DTB [C9]	P53779	MK10_C283	2559.41	87.6	93.8	126.5	95	92.1	105
[K].SLSGGASYVDFLCHMHK.[E]	1xTMT6plex [K17]; 1xTMT6plex [N-Term]; 1xIA-DTB [C13]	P53992	SC24C_C1083	2819.47	119.4	84.2	105.5	97.2	89.5	104.1
[K].SLMDLANDACQLLSGER.[Y]	1xTMT6plex [N-Term]; 1xIA-DTB [C10]	P54098	DPOG1_C471	2574.32	97.4	81.3	105.7	127.3	75	113.3
[R].DRSDCLGEHLYVMVNAK.[F]	1xOxidation [M13]; 1xTMT6plex [K17]; 1xTMT6plex [N-Term]; 1xIA-DTB [C5]	P54105	ICLN_C73	2933.54	110.8	94.6	96.8	102.6	103.8	91.4
[R].DRSDCLGEHLYVMVNAK.[F]	1xTMT6plex [K17]; 1xTMT6plex [N-Term]; 1xIA-DTB [C5]	P54105	ICLN_C73	2917.54	110.2	89.9	101.9	101	104.5	92.6
[R].SDCLGEHLYVMVNAK.[F]	1xTMT6plex [K15]; 1xTMT6plex [N-Term]; 1xIA-DTB [C3]	P54105	ICLN_C73	2646.41	92.8	97.2	99.7	114.5	100.5	95.3
[K].ELNFSHLPSNSVSPGDCLLTTTLGK.[T]	1xTMT6plex [K25]; 1xTMT6plex [N-Term]; 1xIA-DTB [C17]	P54132	BLM_C468	3597.94	119.5	83.9	103.4	88.9	89.4	114.9
[R].LKNCGCLGASPNLEQLQEENLK.[L]	1xCarbamidomethyl [C6]; 2xTMT6plex [K2; K22]; 1xTMT6plex [N-Term]; 1xIA-DTB [C4]	P54136	SYRC_C32	3654.99	83.9	102.8	119.9	89.3	92.7	111.3
[K].NCGCLGASPNLEQLQEENLK.[L]	1xCarbamidomethyl [C4]; 1xTMT6plex [K20]; 1xTMT6plex [N-Term]; 1xIA-DTB [C2]	P54136	SYRC_C32	3184.65	75.8	105.1	116.4	97	86.1	119.7
[K].IVFVPGCSIPLTIVK.[S]	1xTMT6plex [K15]; 1xTMT6plex [N-Term]; 1xIA-DTB [C7]	P54136	SYRC_C369	2553.56	93.6	90.4	91	100.7	113	111.3
[K].VLTAEELNAAQTSVAYGCIK.[Y]	1xTMT6plex [K20]; 1xTMT6plex [N-Term]; 1xIA-DTB [C18]	P54136	SYRC_C502	3048.68	103.5	93	86.8	106	104.1	106.7
[R].MLLCEAVAAVMAK.[G]	1xTMT6plex [K13]; 1xTMT6plex [N-Term]; 1xIA-DTB [C4]	P54136	SYRC_C638	2317.32	96.8	89.9	90.7	108.7	117.3	96.5
[K].AYCFNPSLSTWNLVSDKQDSLAQCADFR.[S]	1xCarbamidomethyl [C3]; 1xTMT6plex [K17]; 1xTMT6plex [N-Term]; 1xIA-DTB [C24]	P54198	HIRA_C867	4204.1	103.1	96.1	101.7	104	89.4	105.7
[K].AFCEPGNVENNGVLSFIK.[H]	1xTMT6plex [K18]; 1xTMT6plex [N-Term]; 1xIA-DTB [C3]	P54577	SYYC_C250	2905.56	100.7	87	99.6	113.2	114.4	85
[K].YEPFSFADDIGSNNCGYYDLQAVLTHQGR.[S]	1xTMT6plex [N-Term]; 1xIA-DTB [C15]	P54578	UBP14_C415	4018.92	108.7	94.8	78.9	99.7	106.8	111.1
[R].ATLPVFDKEELLECIQQLVK.[L]	2xTMT6plex [K8; K20]; 1xTMT6plex [N-Term]; 1xIA-DTB [C14]	P54687	BCAT1_C140	3513.04	135.7	50.3	82.1	116.3	115.6	100
[R].DSKCEYPAACNALETLLIHR.[D]	1xCarbamidomethyl [C4]; 1xTMT6plex [K3]; 1xTMT6plex [N-Term]; 1xIA-DTB [C10]	P54886	P5CS_C612	3271.73	75.5	104.1	119.5	85	78.3	137.5
[K].CEYPAACNALETLLIHR.[D]	1xCarbamidomethyl [C1]; 1xTMT6plex [N-Term]; 1xIA-DTB [C7]	P54886	P5CS_C612	2712.42	93.4	109.3	120.2	96.2	89.4	91.6
[K].YFGCELGAQTQFDVK.[N]	1xTMT6plex [K15]; 1xTMT6plex [N-Term]; 1xIA-DTB [C4]	P55010	IF5_C59	2673.41	75.4	92	104.4	108.2	105.4	114.6
[K].SQICDNAALYAQK.[Y]	1xTMT6plex [K13]; 1xTMT6plex [N-Term]; 1xIA-DTB [C4]	P55060	XPO2_C272	2392.31	88.9	79	83	112.4	121	115.7
[K].NLFEDQNTLTSICEK.[V]	1xTMT6plex [K15]; 1xTMT6plex [N-Term]; 1xIA-DTB [C13]	P55060	XPO2_C344	2722.45	66.6	87.4	96.6	95.6	112	141.8
[K].KICAVGITK.[L]	2xTMT6plex [K1; K9]; 1xTMT6plex [N-Term]; 1xIA-DTB [C3]	P55060	XPO2_C842	2129.34	102.5	92.4	88.3	97.1	107.2	112.6
[K].LLTECPPMMDTEYTK.[L]	1xTMT6plex [K15]; 1xTMT6plex [N-Term]; 1xIA-DTB [C5]	P55060	XPO2_C853	2739.42	83.1	84.5	113.7	96.2	100.7	121.8
[R].QAAPCVLFFDELDSIAK.[A]	1xTMT6plex [K17]; 1xTMT6plex [N-Term]; 1xIA-DTB [C5]	P55072	TERA_C572	2834.55	97.7	93.3	83.5	122.6	114.2	88.7
[R].SVPLPPLILNCR.[A]	1xTMT6plex [N-Term]; 1xIA-DTB [C11]	P55082	MFAP3_C248	2060.23	86.6	108.8	109.6	97	89.5	108.5
[K].FNNWGGSLSLGHPFGATGCR.[L]	1xTMT6plex [N-Term]; 1xIA-DTB [C19]	P55084	ECHB_C435	2816.43	104.2	107.2	101.1	108.1	88.2	91.3
[K].EGGQYGLVAACAAGGQGHAMIVEAYPK.[-]	1xTMT6plex [K27]; 1xTMT6plex [N-Term]; 1xIA-DTB [C11]	P55084	ECHB_C458	3615.88	88.9	84.4	127.6	107.3	84.1	107.6
[R].LLEPEAPGLCRPPLPR.[D]	1xTMT6plex [N-Term]; 1xIA-DTB [C10]	P55196	AFAD_C1684	2496.43	110.8	96.2	95.7	105.3	100.7	91.3
[K].FVAYNEEEEEEDCSLAGPNSYPGSTGAAVGAHDACR.[D]	1xCarbamidomethyl [C13]; 1xTMT6plex [N-Term]; 1xIA-DTB [C35]	P55196	AFAD_C1764	4541.05	116.4	96.8	105.8	90.7	89.4	100.9
[R].LVTDPDSGLCSHYWGAIIR.[Q]	1xTMT6plex [N-Term]; 1xIA-DTB [C10]	P55196	AFAD_C811	2841.49	123.8	76.1	108.4	101.7	88.7	101.3
[K].KQIPCVVSMLTK.[E]	2xTMT6plex [K1; K12]; 1xTMT6plex [N-Term]; 1xIA-DTB [C5]	P55210	CASP7_C290	2543.54	92.2	91.6	109.2	106.5	91.4	109.1
[K].LFFIQACGGEQK.[D]	1xTMT6plex [K12]; 1xTMT6plex [N-Term]; 1xIA-DTB [C7]	P55211	CASP9_C287	2308.29	99.2	111	117.4	106.7	77	88.6
[R].GTCADRDNLTR.[R]	1xTMT6plex [N-Term]; 1xIA-DTB [C3]	P55212	CASP6_C68	1960.02	112.9	88.7	103.1	98.5	99.5	97.2
[K].FQYCVAVGAQTFPSVSAPSKK.[V]	2xTMT6plex [K20; K21]; 1xTMT6plex [N-Term]; 1xIA-DTB [C4]	P55265	DSRAD_C649	3411.91	67.3	90.1	109.2	113.8	107.8	111.8
[R].WFPAVCAHSK.[K]	1xTMT6plex [K10]; 1xTMT6plex [N-Term]; 1xIA-DTB [C6]	P55265	DSRAD_C773	2113.18	75.3	94.4	118.2	116.5	93.2	102.5
[R].VFIWTCDDASSNTWSPK.[L]	1xTMT6plex [K17]; 1xTMT6plex [N-Term]; 1xIA-DTB [C6]	P55735	SEC13_C245	2924.5	98.6	98.8	98.6	108.2	98.5	97.3
[K].LLDLVQQSCNYK.[Q]	1xTMT6plex [K12]; 1xTMT6plex [N-Term]; 1xIA-DTB [C9]	P55769	NH2L1_C30	2391.35	85.7	106.1	102.8	93.2	98.9	113.3
[K].KLLDLVQQSCNYK.[Q]	2xTMT6plex [K1; K13]; 1xTMT6plex [N-Term]; 1xIA-DTB [C10]	P55769	NH2L1_C30	2748.6	99.7	108.1	96.9	92.9	93.4	109
[R].AFPCWDEPAIK.[A]	1xTMT6plex [K11]; 1xTMT6plex [N-Term]; 1xIA-DTB [C4]	P55786	PSA_C190	2244.23	124.1	95	73.1	109.8	111.5	86.5
[K].FCAGGSYVGEDCPQWMVPITISTSEDPNQAK.[L]	1xCarbamidomethyl [C2]; 1xTMT6plex [K31]; 1xTMT6plex [N-Term]; 1xIA-DTB [C12]	P55786	PSA_C537	4355.12	99.6	84.5	106.1	85.9	96.1	127.7
[R].LPADVSPINYSLCLKPDLLDFTFEGK.[L]	2xTMT6plex [K15; K26]; 1xTMT6plex [N-Term]; 1xIA-DTB [C13]	P55786	PSA_C66	4092.27	108.3	77.6	114.2	94.1	107.3	98.4
[R].GLPWSCSADEVMR.[F]	1xTMT6plex [N-Term]; 1xIA-DTB [C6]	P55795	HNRH2_C22	2189.1	114.3	89.2	90.6	117.3	108.6	80.1
[R].GRAEVLISTVGPEDCVVPFLTRPK.[V]	1xTMT6plex [K24]; 1xTMT6plex [N-Term]; 1xIA-DTB [C15]	P56192	SYMC_C38	3551.02	102.5	92.4	115.3	97	91.4	101.4
[R].SCPVVQSSQHLFLDLPK.[L]	1xTMT6plex [K17]; 1xTMT6plex [N-Term]; 1xIA-DTB [C2]	P56192	SYMC_C441	2865.61	116.5	83.7	106	93.1	94.4	106.3
[K].SGDVYSFSVLEPHGCGR.[L]	1xTMT6plex [N-Term]; 1xIA-DTB [C15]	P57081	WDR4_C137	2548.28	108.9	86.9	97.7	99.9	96.5	110.1
[K].LPSETIFVGCEFLHHLLR.[E]	1xTMT6plex [N-Term]; 1xIA-DTB [C10]	P57678	GEMI4_C317	2849.57	115.6	92.7	106.3	91.6	101.2	92.6
[R].LCDSLTSFSQNATLYLNR.[T]	1xTMT6plex [N-Term]; 1xIA-DTB [C2]	P57678	GEMI4_C349	2784.46	47.9	103.8	123.9	109.7	115.3	99.5
[K].WAFSDEWVACLGSNR.[A]	1xTMT6plex [N-Term]; 1xIA-DTB [C10]	P57678	GEMI4_C440	2479.24	92.7	107.1	107.2	100.6	89.9	102.6
[R].IFIQTLEANACR.[E]	1xTMT6plex [N-Term]; 1xIA-DTB [C11]	P57678	GEMI4_C683	2117.17	100.2	95.1	97.5	115.2	98.7	93.2
[R].GITLDLGFSCFSVPLPAR.[L]	1xTMT6plex [N-Term]; 1xIA-DTB [C10]	P57772	SELB_C55	2631.45	120.6	97.3	127.5	99.1	63.5	91.9
[R].VLLITPGFLQDPWCK.[Y]	1xTMT6plex [K15]; 1xTMT6plex [N-Term]; 1xIA-DTB [C14]	P58753	TIRAP_C157	2697.56	109.2	90.2	86.3	82.4	131	100.9
[R].IIYGGSVTGATCK.[E]	1xTMT6plex [K13]; 1xTMT6plex [N-Term]; 1xIA-DTB [C12]	P60174	TPIS_C218	2237.27	106.9	92.1	73.3	129.5	125.8	72.4
[K].GRDNIIDLFLYQPQYLNAIQTMCPHILR.[Y]	1xTMT6plex [N-Term]; 1xIA-DTB [C23]	P60228	EIF3E_C250	4084.18	106.1	67.9	104.6	79.6	122	119.8
[R].VCISILHAPGDDPMGYESSAER.[W]	1xTMT6plex [N-Term]; 1xIA-DTB [C2]	P60604	UB2G2_C89	3085.53	137.8	90.5	106.9	78.1	76	110.8
[R].CPEALFQPSFLGMESCGIHETTFNSIMK.[C]	1xCarbamidomethyl [C1]; 1xOxidation [M13]; 1xTMT6plex [K28]; 1xTMT6plex [N-Term]; 1xIA-DTB [C16]	P60709	ACTB_C272	4158.06	126.4	79.9	101.8	97.2	87	107.7
[R].FRCPEALFQPSFLGMESCGIHETTFNSIMK.[C]	1xCarbamidomethyl [C3]; 1xTMT6plex [K30]; 1xTMT6plex [N-Term]; 1xIA-DTB [C18]	P60709	ACTB_C272	4445.23	103.3	91.8	111.8	94	80.3	118.9
[K].VVMALGDYMGASCHACIGGTNVR.[A]	1xCarbamidomethyl [C13]; 1xTMT6plex [N-Term]; 1xIA-DTB [C16]	P60842	IF4A1_C134	3120.54	150.3	70.9	100.9	90.8	90.3	96.8
[K].VVMALGDYMGASCHACIGGTNVR.[A]	1xCarbamidomethyl [C13]; 1xOxidation [M]; 1xTMT6plex [N-Term]; 1xIA-DTB [C16]	P60842	IF4A1_C134	3136.54	141.8	74.9	102.8	91.9	91.3	97.3
[R].GKDCAVIVTQK.[K]	2xTMT6plex [K2; K11]; 1xTMT6plex [N-Term]; 1xIA-DTB [C4]	P60900	PSA6_C47	2358.41	97.9	79.3	109.5	112.8	118.3	82.3
[K].LGGSLIVAFEGCPV.[-]	1xTMT6plex [N-Term]; 1xIA-DTB [C12]	P60981	DEST_C163	2100.17	79.4	97.5	116.2	99.7	97.2	109.9
[R].LPACVVDCGTGYTK.[L]	1xCarbamidomethyl [C4]; 1xTMT6plex [K14]; 1xTMT6plex [N-Term]; 1xIA-DTB [C8]	P61158	ARP3_C12	2451.31	110.1	100.6	95.5	92.9	103.7	97.2
[R].KVVVCDNGTGFVK.[C]	2xTMT6plex [K1; K13]; 1xTMT6plex [N-Term]; 1xIA-DTB [C5]	P61160	ARP2_C11	2562.5	98.4	116.3	87.7	72.3	109.2	116.2
[K].LCYVGYNIEQEQK.[L]	1xTMT6plex [K13]; 1xTMT6plex [N-Term]; 1xIA-DTB [C2]	P61160	ARP2_C221	2554.37	111.3	113.6	64.5	90.2	115	105.3
[R].ACYLSINPQKDETLETEK.[A]	2xTMT6plex [K10; K18]; 1xTMT6plex [N-Term]; 1xIA-DTB [C2]	P61163	ACTZ_C222	3278.79	129	92.7	74.7	103.9	115.9	83.8
[R].VALALCLGKPADVYLIDEPSAYLDSEQR.[L]	1xTMT6plex [K9]; 1xTMT6plex [N-Term]; 1xIA-DTB [C6]	P61221	ABCE1_C475	4017.18	103	93.5	83.6	106.3	121.8	91.8
[K].CPFGALSIVNLPSNLEK.[E]	1xTMT6plex [K17]; 1xTMT6plex [N-Term]; 1xIA-DTB [C1]	P61221	ABCE1_C65	2769.57	91.4	132.2	64.9	51.2	118.7	141.6
[K].KCPFGALSIVNLPSNLEK.[E]	2xTMT6plex [K1; K18]; 1xTMT6plex [N-Term]; 1xIA-DTB [C2]	P61221	ABCE1_C65	3126.83	119.1	143	56	50.7	112.9	118.2
[K].ACQSIYPLHDVFVR.[K]	1xTMT6plex [N-Term]; 1xIA-DTB [C2]	P61247	RS3A_C201	2386.29	135.3	79.4	75.2	110.3	112.3	87.5
[R].LDECEEAFQGTK.[V]	1xTMT6plex [K12]; 1xTMT6plex [N-Term]; 1xIA-DTB [C4]	P61289	PSME3_C92	2337.22	91.8	103.3	109.4	91.8	93.3	110.4
[K].RRLDECEEAFQGTK.[V]	1xTMT6plex [K14]; 1xTMT6plex [N-Term]; 1xIA-DTB [C6]	P61289	PSME3_C92	2649.42	85.1	106.3	108.6	97.3	96.1	106.7
[R].RLDECEEAFQGTK.[V]	1xTMT6plex [K13]; 1xTMT6plex [N-Term]; 1xIA-DTB [C5]	P61289	PSME3_C92	2493.32	100.8	98.2	113	94.2	89.7	104.1
[K].FLEVIKPFCVILPEIQKPER.[K]	2xTMT6plex [K6; K17]; 1xTMT6plex [N-Term]; 1xIA-DTB [C9]	P61619	S61A1_C13	3595.14	94.8	99.2	91	114.4	111.2	89.4
[R].FLLADNLYCK.[A]	1xTMT6plex [K10]; 1xTMT6plex [N-Term]; 1xIA-DTB [C9]	P61758	PFD3_C113	2167.23	93.2	112.2	101.7	105	92.9	95
[R].IWDTASGQCLK.[T]	1xTMT6plex [K11]; 1xTMT6plex [N-Term]; 1xIA-DTB [C9]	P61964	WDR5_C205	2189.22	77.2	86	114.8	121.3	109.6	91.1
[K].IIPTLEEGLQLPSPTATSQLPLESDAVECLNYQHYK.[G]	1xTMT6plex [K36]; 1xTMT6plex [N-Term]; 1xIA-DTB [C29]	P61978	HNRPK_C132	4965.63	121.1	93.5	90.9	83.3	92.5	118.7
[K].FVVDVDKNIDINDVTPNCR.[V]	1xTMT6plex [K7]; 1xTMT6plex [N-Term]; 1xIA-DTB [C18]	P62195	PRS8_C112	3143.69	87	94.4	99.4	90.8	110.8	117.5
[K].NCIVLIDSTPYR.[Q]	1xTMT6plex [N-Term]; 1xIA-DTB [C2]	P62241	RS8_C100	2132.17	80.5	105.5	92.5	116.4	106.5	98.7
[R].LDVGNFSWGSECCTR.[K]	1xCarbamidomethyl [C12]; 1xTMT6plex [N-Term]; 1xIA-DTB [C13]	P62241	RS8_C72	2469.19	100.7	88.9	96.3	108.6	112.3	93.3
[R].LDVGNFSWGSECCTRK.[T]	1xCarbamidomethyl [C12]; 1xTMT6plex [K16]; 1xTMT6plex [N-Term]; 1xIA-DTB [C13]	P62241	RS8_C72	2826.44	65.6	106.1	112.5	103.9	100.7	111.3
[K].ITAFVPNDGCLNFIEENDEVLVAGFGRK.[G]	1xTMT6plex [K28]; 1xTMT6plex [N-Term]; 1xIA-DTB [C10]	P62266	RS23_C90	4035.14	66	102.2	112.5	110.4	96.2	112.7
[K].ITAFVPNDGCLNFIEENDEVLVAGFGR.[K]	1xTMT6plex [N-Term]; 1xIA-DTB [C10]	P62266	RS23_C90	3677.88	121.7	91.4	104.6	96.9	103.1	82.3
[K].KITAFVPNDGCLNFIEENDEVLVAGFGR.[K]	1xTMT6plex [K1]; 1xTMT6plex [N-Term]; 1xIA-DTB [C11]	P62266	RS23_C90	4035.14	103.8	102.9	99.8	107	104.9	81.6
[K].NMSVHLSPCFR.[D]	1xTMT6plex [N-Term]; 1xIA-DTB [C9]	P62280	RS11_C116	2029.07	134.8	90.4	80.2	105.9	106.7	82.1
[R].DVQIGDIVTVGECRPLSK.[T]	1xTMT6plex [K18]; 1xTMT6plex [N-Term]; 1xIA-DTB [C13]	P62280	RS11_C131	2896.63	104.1	89.4	100.1	115.2	105.2	86
[R].HCNMVLENVK.[E]	1xTMT6plex [K10]; 1xTMT6plex [N-Term]; 1xIA-DTB [C2]	P62316	SMD2_C63	2154.19	99.7	103.5	81.9	101.7	123.1	90.2
[K].GCLLYGPPGTGK.[T]	1xTMT6plex [K12]; 1xTMT6plex [N-Term]; 1xIA-DTB [C2]	P62333	PRS10_C170	2130.21	120.3	95.9	78.2	96.3	111.8	97.5
[K].VGLFTEIGPMSCFISR.[H]	1xTMT6plex [N-Term]; 1xIA-DTB [C12]	P62487	RPB7_C106	2495.34	102.7	80.3	89.5	101.7	115.4	110.4
[R].GFQFVSSSLPDICYR.[C]	1xTMT6plex [N-Term]; 1xIA-DTB [C13]	P62633	CNBP_C54	2457.28	118.1	96.2	82.2	92	111.1	100.5
[K].FDTGNLCMVTGGANLGR.[I]	1xTMT6plex [N-Term]; 1xIA-DTB [C7]	P62701	RS4X_C181	2464.26	80.3	103	84.3	122.5	126.9	83
[K].LRECLPLIIFLR.[N]	1xTMT6plex [N-Term]; 1xIA-DTB [C4]	P62701	RS4X_C41	2224.36	75.9	104.9	97.8	108.1	122.7	90.6
[R].QITQVYGFYDECLRK.[Y]	1xTMT6plex [K15]; 1xTMT6plex [N-Term]; 1xIA-DTB [C12]	P62714	PP2AB_C133	2830.53	97.9	101	111.9	94.3	111.6	83.3
[R].AHQLVMEGYNWCHDR.[N]	1xTMT6plex [N-Term]; 1xIA-DTB [C12]	P62714	PP2AB_C251	2597.27	35.4	101.1	119.5	107.2	176.9	59.8
[R].GCIVDANLSVLNLVIVK.[K]	1xTMT6plex [K17]; 1xTMT6plex [N-Term]; 1xIA-DTB [C2]	P62753	RS6_C100	2737.64	130.4	86.1	96.5	108.6	99	79.5
[K].LNISFPATGCQK.[L]	1xTMT6plex [K12]; 1xTMT6plex [N-Term]; 1xIA-DTB [C10]	P62753	RS6_C12	2246.27	105.8	94.5	89.9	118.4	110.9	80.6
[-].MKLNISFPATGCQK.[L]	2xTMT6plex [K2; K14]; 1xTMT6plex [N-Term]; 1xIA-DTB [C12]	P62753	RS6_C12	2734.57	74.3	117.8	109.7	103.6	92.2	102.6
[K].SDPSIVLLLQCDIQK.[-]	1xTMT6plex [K15]; 1xTMT6plex [N-Term]; 1xIA-DTB [C11]	P62760	VISL1_C187	2639.52	94.7	94.8	125.8	90.8	87.5	106.5
[R].VCENIPIVLCGNKVDIK.[D]	1xCarbamidomethyl [C10]; 2xTMT6plex [K13; K17]; 1xTMT6plex [N-Term]; 1xIA-DTB [C2]	P62826	RAN_C112	3110.8	76.3	106.3	105.3	111.6	102.3	98.1
[R].VCENIPIVLCGNK.[V]	1xCarbamidomethyl [C2]; 1xTMT6plex [K13]; 1xTMT6plex [N-Term]; 1xIA-DTB [C10]	P62826	RAN_C120	2426.37	110	93	79.1	114.2	124	79.7
[R].ISLGLPVGAVINCADNTGAK.[N]	1xTMT6plex [K20]; 1xTMT6plex [N-Term]; 1xIA-DTB [C13]	P62829	RL23_C28	2880.64	83.1	98.8	116.7	106.4	93.5	101.5
[R].QWCNCAFLESSAK.[S]	1xCarbamidomethyl [C5]; 1xTMT6plex [K13]; 1xTMT6plex [N-Term]; 1xIA-DTB [C3]	P62834	RAP1A_C139	2511.29	81.5	106.6	91	113.3	105.3	102.2
[R].LFVSGACDASAK.[L]	1xTMT6plex [K12]; 1xTMT6plex [N-Term]; 1xIA-DTB [C7]	P62873	GBB1_C204	2136.19	70.6	72.5	85.6	81.9	132.9	156.6
[R].ADQELMTYSHDNIICGITSVSFSK.[S]	1xTMT6plex [K24]; 1xTMT6plex [N-Term]; 1xIA-DTB [C15]	P62873	GBB1_C271	3626.86	138.1	78.4	110.2	75.6	89.7	108
[R].LLLAGYDDFNCNVWDALK.[A]	1xTMT6plex [K18]; 1xTMT6plex [N-Term]; 1xIA-DTB [C11]	P62873	GBB1_C294	3037.62	84.6	66.3	76	76.2	142.4	154.4
[R].KACGDSTLTQITAGLDPVGR.[I]	1xTMT6plex [K1]; 1xTMT6plex [N-Term]; 1xIA-DTB [C3]	P62879	GBB2_C25	2970.64	80.4	75	112.3	103.1	115.4	113.7
[R].LLLAGYDDFNCNIWDAMK.[G]	1xTMT6plex [K18]; 1xTMT6plex [N-Term]; 1xIA-DTB [C11]	P62879	GBB2_C294	3069.59	86.6	74.5	79.7	89.5	146.8	122.9
[R].LLLAGYDDFNCNIWDAMKGDR.[A]	1xTMT6plex [K18]; 1xTMT6plex [N-Term]; 1xIA-DTB [C11]	P62879	GBB2_C294	3397.74	58	100.1	97.8	77.3	126.5	140.3
[K].TGVHHYSGNNIELGTACGK.[Y]	1xTMT6plex [K19]; 1xTMT6plex [N-Term]; 1xIA-DTB [C17]	P62888	RL30_C85	2925.54	134.9	86.2	69.4	108	135.2	66.4
[R].VCTLAIIDPGDSDIIR.[S]	1xTMT6plex [N-Term]; 1xIA-DTB [C2]	P62888	RL30_C92	2439.35	84.2	107.3	101.3	117.3	80.7	109.2
[K].KVLCLAVAVGHVK.[M]	2xTMT6plex [K1; K13]; 1xTMT6plex [N-Term]; 1xIA-DTB [C4]	P62906	RL10A_C164	2533.6	95.6	97.3	87.8	112	112.5	94.8
[K].FLVHNVKELEVLLMCNK.[S]	2xTMT6plex [K7; K17]; 1xTMT6plex [N-Term]; 1xIA-DTB [C15]	P62910	RL32_C91	3225.88	47.5	117.6	134.9	78.8	83.5	137.7
[K].ELEVLLMCNK.[S]	1xTMT6plex [K10]; 1xTMT6plex [N-Term]; 1xIA-DTB [C8]	P62910	RL32_C91	2159.23	106.4	95	97.9	102.1	104.3	94.2
[K].SYCAEIAHNVSSK.[N]	1xTMT6plex [K13]; 1xTMT6plex [N-Term]; 1xIA-DTB [C3]	P62910	RL32_C96	2376.27	126.3	95.1	83.6	94.2	105.3	95.5
[R].KLCLNICVGESGDR.[L]	1xCarbamidomethyl [C7]; 1xTMT6plex [K1]; 1xTMT6plex [N-Term]; 1xIA-DTB [C3]	P62913	RL11_C21	2531.38	94.3	98.7	79.8	103.6	134.5	89.1
[K].KAQLNIGNVLPVGTMPEGTIVCCLEEKPGDR.[G]	1xCarbamidomethyl [C23]; 2xTMT6plex [K1; K27]; 1xTMT6plex [N-Term]; 1xIA-DTB [C22]	P62917	RL8_C114	4535.48	86.5	91.5	116.4	106.7	104.3	94.5
[R].TELFIAAEGIHTGQFVYCGK.[K]	1xTMT6plex [K20]; 1xTMT6plex [N-Term]; 1xIA-DTB [C18]	P62917	RL8_C90	3151.7	93.5	104.7	92.2	103.4	100.4	105.8
[K].HTGPGILSMANAGPNTNGSQFFICTAK.[T]	1xTMT6plex [K27]; 1xTMT6plex [N-Term]; 1xIA-DTB [C24]	P62937	PPIA_C115	3701.93	107.8	98.4	100.7	115.7	102.1	75.2
[R].IIPGFMCQGGDFTR.[H]	1xTMT6plex [N-Term]; 1xIA-DTB [C7]	P62937	PPIA_C62	2280.18	102.5	93	96.6	113	109.8	85
[R].ECPSDECGAGVFMASHFDR.[H]	1xCarbamidomethyl [C7]; 1xTMT6plex [N-Term]; 1xIA-DTB [C2]	P62979	RS27A_C121	2853.3	107.4	115.9	101.3	92.9	84.5	97.9
[R].ANPDPNCCLGVFGLSLYTTER.[D]	1xCarbamidomethyl [C8]; 1xTMT6plex [N-Term]; 1xIA-DTB [C7]	P62995	TRA2B_C118	3065.54	101.3	93.1	113.2	94.8	97.9	99.7
[R].AVLCPPPVK.[K]	1xTMT6plex [K9]; 1xTMT6plex [N-Term]; 1xIA-DTB [C4]	P63000	RAC1_C178	1891.16	113.3	92.6	97.6	102.6	100.5	93.3
[K].ENQWCEEK.[-]	1xTMT6plex [K8]; 1xTMT6plex [N-Term]; 1xIA-DTB [C5]	P63208	SKP1_C160	2033.05	91	100.7	100.2	111.8	99.2	97
[R].FSPNSSNPIIVSCGWDK.[L]	1xTMT6plex [K17]; 1xTMT6plex [N-Term]; 1xIA-DTB [C13]	P63244	RACK1_C168	2818.5	92.7	110.5	80.9	98.6	115.2	102.1
[K].HLYTLDGGDIINALCFSPNR.[Y]	1xTMT6plex [N-Term]; 1xIA-DTB [C15]	P63244	RACK1_C240	2957.55	107.8	90.8	94.2	105.7	111.9	89.6
[R].YWLCAATGPSIK.[I]	1xTMT6plex [K12]; 1xTMT6plex [N-Term]; 1xIA-DTB [C4]	P63244	RACK1_C249	2277.28	103.7	103.5	67.5	113.5	128.1	83.6
[K].NMITGTSQADCAVLIVAAGVGEFEAGISK.[N]	1xTMT6plex [K29]; 1xTMT6plex [N-Term]; 1xIA-DTB [C11]	P68104	EF1A1_C111	3820.04	116.5	76.4	81.3	121.1	103	101.7
[R].KDGNASGTTLLEALDCILPPTRPTDKPLR.[L]	2xTMT6plex [K1; K26]; 1xTMT6plex [N-Term]; 1xIA-DTB [C16]	P68104	EF1A1_C234	4289.43	94.6	90.4	82.4	122.8	131.3	78.4
[K].SGDAAIVDMVPGKPMCVESFSDYPPLGR.[F]	1xTMT6plex [K13]; 1xTMT6plex [N-Term]; 1xIA-DTB [C16]	P68104	EF1A1_C411	3906	67.4	103.6	114.4	102.1	105.3	107.2
[K].SGDAAIVDMVPGKPMCVESFSDYPPLGR.[F]	1xOxidation [M]; 1xTMT6plex [K13]; 1xTMT6plex [N-Term]; 1xIA-DTB [C16]	P68104	EF1A1_C411	3922	77.7	99	111.2	105.4	97.6	109.1
[K].AYHEQLSVAEITNACFEPANQMVK.[C]	1xTMT6plex [K24]; 1xTMT6plex [N-Term]; 1xIA-DTB [C15]	P68363	TBA1B_C295	3660.89	128.5	70.8	108.9	105.6	83	103.2
[K].AYHEQLSVAEITNACFEPANQMVK.[C]	1xOxidation [M22]; 1xTMT6plex [K24]; 1xTMT6plex [N-Term]; 1xIA-DTB [C15]	P68363	TBA1B_C295	3676.89	88.2	112.7	134.7	92.2	96.7	75.5
[R].SIQFVDWCPTGFK.[V]	1xTMT6plex [K13]; 1xTMT6plex [N-Term]; 1xIA-DTB [C8]	P68363	TBA1B_C347	2495.35	81.9	100.9	103.7	102.7	100.4	110.4
[K].RSIQFVDWCPTGFK.[V]	1xTMT6plex [K14]; 1xTMT6plex [N-Term]; 1xIA-DTB [C9]	P68363	TBA1B_C347	2651.45	71.5	111.3	106.3	100.8	96.6	113.6
[R].AVCMLSNTTAIAEAWAR.[L]	1xTMT6plex [N-Term]; 1xIA-DTB [C3]	P68363	TBA1B_C376	2546.34	114.6	92.4	105.8	92.2	94.4	100.5
[R].AVCMLSNTTAIAEAWAR.[L]	1xOxidation [M4]; 1xTMT6plex [N-Term]; 1xIA-DTB [C3]	P68363	TBA1B_C376	2562.34	116	101.7	102.5	91.9	92.3	95.6
[K].ICKPLHELIMQLLEETPEEK.[Q]	2xTMT6plex [K3; K20]; 1xTMT6plex [N-Term]; 1xIA-DTB [C2]	P68402	PA1B2_C206	3590.03	93.8	78	81.2	132.4	137.1	77.5
[R].LSCLAVGLALLK.[R]	1xTMT6plex [K12]; 1xTMT6plex [N-Term]; 1xIA-DTB [C3]	P78316	NOP14_C687	2168.36	98.7	93.2	83.8	120.9	117.6	85.7
[R].MCSLMLSK.[E]	1xTMT6plex [K8]; 1xTMT6plex [N-Term]; 1xIA-DTB [C2]	P78344	IF4G2_C282	1880.06	85.8	104.5	107.9	94.6	110.2	97.1
[K].QEGIATSDNFMQAFLNVLDQCPK.[L]	1xTMT6plex [K23]; 1xTMT6plex [N-Term]; 1xIA-DTB [C21]	P78344	IF4G2_C629	3536.83	81.3	79	103.4	123.1	121.1	92.1
[R].LTIIVSDPSHCNVLR.[A]	1xTMT6plex [N-Term]; 1xIA-DTB [C11]	P78346	RPP30_C87	2405.35	118	82.1	102.9	86.5	92.2	118.3
[R].SILSPGGSCGPIK.[V]	1xTMT6plex [K13]; 1xTMT6plex [N-Term]; 1xIA-DTB [C9]	P78347	GTF2I_C215	2183.26	83.5	98.6	104.7	105.6	98.6	109
[R].MVVTFLMSALESMCK.[E]	1xTMT6plex [K15]; 1xTMT6plex [N-Term]; 1xIA-DTB [C14]	P78347	GTF2I_C34	2657.43	83.2	99.6	114.6	102.3	94	106.3
[R].KMVDQLFCK.[K]	2xTMT6plex [K1; K9]; 1xTMT6plex [N-Term]; 1xIA-DTB [C8]	P78347	GTF2I_C475	2308.35	110.7	94.2	88.9	110.6	107.8	87.8
[K].ITINPGCVVVDGMPPGVSFK.[A]	1xTMT6plex [K20]; 1xTMT6plex [N-Term]; 1xIA-DTB [C7]	P78347	GTF2I_C903	2997.67	102.6	98.3	102.5	103.7	85.3	107.7
[R].GFPPSASLCLLDLVK.[W]	1xTMT6plex [K15]; 1xTMT6plex [N-Term]; 1xIA-DTB [C9]	P78527	PRKDC_C1164	2527.47	118.4	88.2	100.2	101.3	99.5	92.4
[K].DVLKEEGVSFLINTFEGGGCGQPSGILAQPTLLYLR.[G]	1xTMT6plex [K4]; 1xTMT6plex [N-Term]; 1xIA-DTB [C20]	P78527	PRKDC_C1229	4789.6	90	102.6	107.3	92.5	96.3	111.3
[R].QCLPSLDLSCK.[Q]	1xCarbamidomethyl [C2]; 1xTMT6plex [K11]; 1xTMT6plex [N-Term]; 1xIA-DTB [C10]	P78527	PRKDC_C1507	2231.23	85.3	116.4	105.6	97	88.8	106.9
[R].RGSCVTQVGLLESVYEMFR.[K]	1xTMT6plex [N-Term]; 1xIA-DTB [C4]	P78527	PRKDC_C1791	2912.53	80.3	78.7	101.6	107	117	115.4
[R].GSCVTQVGLLESVYEMFRK.[D]	1xTMT6plex [K19]; 1xTMT6plex [N-Term]; 1xIA-DTB [C3]	P78527	PRKDC_C1791	3113.69	101.6	97	124.5	95.7	76.1	105
[K].INQVFHGSCITEGNELTK.[T]	1xTMT6plex [K18]; 1xTMT6plex [N-Term]; 1xIA-DTB [C9]	P78527	PRKDC_C1904	2957.59	109.3	90.1	120.7	94.2	85.4	100.3
[K].GLSSLLCNFTK.[S]	1xTMT6plex [K11]; 1xTMT6plex [N-Term]; 1xIA-DTB [C7]	P78527	PRKDC_C232	2150.24	106.4	85.4	85.7	105.4	115.3	101.8
[R].KNILEESLCELVAK.[Q]	2xTMT6plex [K1; K14]; 1xTMT6plex [N-Term]; 1xIA-DTB [C9]	P78527	PRKDC_C2342	2785.65	102.5	82	107.6	102.5	106.7	98.6
[K].NILEESLCELVAK.[Q]	1xTMT6plex [K13]; 1xTMT6plex [N-Term]; 1xIA-DTB [C8]	P78527	PRKDC_C2342	2428.39	81.1	93.5	117.4	104.1	89.4	114.4
[R].CFFLSK.[I]	1xTMT6plex [K6]; 1xTMT6plex [N-Term]; 1xIA-DTB [C1]	P78527	PRKDC_C3187	1712	75.2	119.8	86.6	98.9	111.1	108.4
[R].SQGCSEQVLTVLK.[T]	1xTMT6plex [K13]; 1xTMT6plex [N-Term]; 1xIA-DTB [C4]	P78527	PRKDC_C3293	2359.34	85.5	94.7	92.6	93.7	114.7	118.9
[R].GYGLFAGPCK.[V]	1xTMT6plex [K10]; 1xTMT6plex [N-Term]; 1xIA-DTB [C9]	P78527	PRKDC_C373	1980.11	119.9	90.6	86.1	96.2	108.1	99.1
[R].VEQLFQVMNGILAQDSACSQR.[A]	1xTMT6plex [N-Term]; 1xIA-DTB [C18]	P78527	PRKDC_C3781	3075.59	76.2	90.7	85.2	99.9	125.6	122.4
[K].DILPCLDGYLK.[T]	1xTMT6plex [K11]; 1xTMT6plex [N-Term]; 1xIA-DTB [C5]	P78527	PRKDC_C795	2217.27	97.5	86.1	96.3	104.7	111.9	103.5
[K].FLCIFLEK.[M]	1xTMT6plex [K8]; 1xTMT6plex [N-Term]; 1xIA-DTB [C3]	P78527	PRKDC_C90	1980.18	83.7	108.6	100.1	114.6	104.5	88.5
[R].GWSGNSWGGISLGPPDPGPCGETYEDFDTR.[I]	1xTMT6plex [N-Term]; 1xIA-DTB [C20]	P82675	RT05_C211	3892.81	100.2	91.9	115.7	104.5	89.9	97.9
[K].HPLTQELKECEGIVPVPLAEK.[L]	2xTMT6plex [K8; K21]; 1xTMT6plex [N-Term]; 1xIA-DTB [C10]	P82932	RT06_C105	3527.03	82.8	114.6	111.4	94.2	88.7	108.2
[K].CESAFLSK.[R]	1xTMT6plex [K8]; 1xTMT6plex [N-Term]; 1xIA-DTB [C1]	P83731	RL24_C36	1852.04	68.6	105.6	104.8	106.9	98.8	115.3
[-].MKVELCSFSGYK.[I]	2xTMT6plex [K2; K12]; 1xTMT6plex [N-Term]; 1xIA-DTB [C6]	P83731	RL24_C6	2588.45	83.1	112.1	111.6	95	89.4	108.8
[K].NICFTVWDVGGQDK.[I]	1xTMT6plex [K14]; 1xTMT6plex [N-Term]; 1xIA-DTB [C3]	P84085	ARF5_C62	2549.36	84.9	100.6	96.2	111.1	108.2	99
[R].DSCPLDCK.[V]	1xCarbamidomethyl [C7]; 1xTMT6plex [K8]; 1xTMT6plex [N-Term]; 1xIA-DTB [C3]	P84103	SRSF3_C6	1905	82.7	97.9	112	102.1	89	116.3
[R].SMVSPVPSPTGTISVPNSCPASPR.[G]	1xTMT6plex [N-Term]; 1xIA-DTB [C19]	P85037	FOXK1_C254	3106.62	76.5	110.6	112.3	100.3	87.5	112.8
[R].RLDSIVGPQLTVLASDICEQFNINKR.[M]	1xTMT6plex [K25]; 1xTMT6plex [N-Term]; 1xIA-DTB [C18]	P86791	CCZ1_C358	3897.18	106.4	106.1	102.3	91.1	99	95.1
[K].LCATQFNNIFFLD.[-]	1xTMT6plex [N-Term]; 1xIA-DTB [C2]	P86791	CCZ1_C471	2284.2	116.1	73.9	97.3	97.5	99.6	115.7
[R].VASMAQSAPSEAPSCSPFGK.[K]	1xTMT6plex [K20]; 1xTMT6plex [N-Term]; 1xIA-DTB [C15]	Q00013	EM55_C242	2919.51	91.1	99.8	104.6	106.3	94.3	103.8
[K].GWAPTFLGYSMQGLCK.[F]	1xTMT6plex [K16]; 1xTMT6plex [N-Term]; 1xIA-DTB [C15]	Q00325	MPCP_C136	2726.46	141.5	90.6	78.4	106.3	108.4	74.7
[R].CYSAEVVTLWYRPPDVLFGAK.[L]	1xTMT6plex [K21]; 1xTMT6plex [N-Term]; 1xIA-DTB [C1]	Q00535	CDK5_C157	3381.84	90.1	113	103.3	101.9	98.2	93.6
[R].AACEQLHQQQQQQQEETAAATLLLQGEEEGEED.[-]	1xTMT6plex [N-Term]; 1xIA-DTB [C3]	Q00577	PURA_C292	4421.1	105.4	88.8	130.6	90.3	76.6	108.3
[K].VIQCFAETGQVQK.[I]	1xTMT6plex [K13]; 1xTMT6plex [N-Term]; 1xIA-DTB [C4]	Q00610	CLH1_C491	2418.36	96.1	86.2	106.8	122.1	108.1	80.7
[R].IHEGCEEPATHNALAK.[I]	1xTMT6plex [K16]; 1xTMT6plex [N-Term]; 1xIA-DTB [C5]	Q00610	CLH1_C870	2687.43	16.5	91.3	187.2	87	160.9	57.1
[K].NCMTDLLAK.[L]	1xTMT6plex [K9]; 1xTMT6plex [N-Term]; 1xIA-DTB [C2]	Q00765	REEP5_C18	1976.11	84.9	121.7	92.2	101.3	100.8	99.1
[K].EVLAGRPLFPHVLCHNCAVEFNFGQK.[E]	1xCarbamidomethyl [C17]; 1xTMT6plex [K26]; 1xTMT6plex [N-Term]; 1xIA-DTB [C14]	Q00839	HNRPU_C450	3950.11	78.7	107.1	120	94.8	91	108.5
[K].DCEVVMMIGLPGAGK.[T]	1xTMT6plex [K15]; 1xTMT6plex [N-Term]; 1xIA-DTB [C2]	Q00839	HNRPU_C497	2487.35	87.3	101.1	103.1	109.5	100.1	98.9
[K].KDCEVVMMIGLPGAGK.[T]	2xTMT6plex [K1; K16]; 1xTMT6plex [N-Term]; 1xIA-DTB [C3]	Q00839	HNRPU_C497	2844.61	92.1	97.5	103	109.3	103.6	94.4
[K].GPEEKKDCEVVMMIGLPGAGK.[T]	3xTMT6plex [K5; K6; K21]; 1xTMT6plex [N-Term]; 1xIA-DTB [C8]	Q00839	HNRPU_C497	3614.03	85.5	92.1	126.2	94.3	88.5	113.5
[K].KDCEVVMMIGLPGAGK.[T]	1xOxidation [M]; 2xTMT6plex [K1; K16]; 1xTMT6plex [N-Term]; 1xIA-DTB [C3]	Q00839	HNRPU_C497	2860.61	95.6	97.4	103.1	111.9	100.7	91.3
[R].KMCLFAGFQR.[K]	1xTMT6plex [K1]; 1xTMT6plex [N-Term]; 1xIA-DTB [C3]	Q00839	HNRPU_C594	2168.22	93.9	115.8	89	94	107.8	99.5
[K].AVVVCPKDEDYKQR.[T]	2xTMT6plex [K7; K12]; 1xTMT6plex [N-Term]; 1xIA-DTB [C5]	Q00839	HNRPU_C607	2846.62	84.5	104.9	114.4	88.1	95.8	112.3
[R].KAVVVCPK.[D]	2xTMT6plex [K1; K8]; 1xTMT6plex [N-Term]; 1xIA-DTB [C6]	Q00839	HNRPU_C607	2040.3	113.6	102.1	89	103.9	102.9	88.4
[R].KAVVVCPKDEDYK.[Q]	3xTMT6plex [K1; K8; K13]; 1xTMT6plex [N-Term]; 1xIA-DTB [C6]	Q00839	HNRPU_C607	2919.71	85.9	96.6	100.8	109.4	108.7	98.7
[K].GNFTLPEVAECFDEITYVELQKEEAQK.[L]	2xTMT6plex [K22; K27]; 1xTMT6plex [N-Term]; 1xIA-DTB [C11]	Q00839	HNRPU_C648	4327.28	104.8	82.5	124.6	98.6	78.2	111.4
[R].SLPGPAPCLK.[H]	1xTMT6plex [K10]; 1xTMT6plex [N-Term]; 1xIA-DTB [C8]	Q01433	AMPD2_C107	1950.16	96.5	115	100.6	91.3	90.7	106
[K].CGVPFTDLLDAAK.[S]	1xTMT6plex [K13]; 1xTMT6plex [N-Term]; 1xIA-DTB [C1]	Q01433	AMPD2_C230	2317.3	76.1	103	104.7	105.2	100.4	110.6
[K].LVVECVMNNVTCTR.[I]	1xCarbamidomethyl [C12]; 1xTMT6plex [N-Term]; 1xIA-DTB [C5]	Q01469	FABP5_C120	2376.24	130.9	88.6	78.9	85.9	138.4	77.4
[R].ALLVTASQCQQPAENK.[L]	1xTMT6plex [K16]; 1xTMT6plex [N-Term]; 1xIA-DTB [C9]	Q01518	CAP1_C93	2668.49	110.4	86.5	103.6	110.5	98.2	90.7
[K].VTQDATPGSALDKITASLCDLK.[S]	2xTMT6plex [K13; K22]; 1xTMT6plex [N-Term]; 1xIA-DTB [C19]	Q01581	HMCS1_C406	3443.94	79.9	99.2	108.7	110.3	92.2	109.8
[R].LLYEIQNRDEQAFPALSSSSVNQSASQSSNPCVQR.[K]	1xTMT6plex [N-Term]; 1xIA-DTB [C32]	Q01804	OTUD4_C489	4592.3	97.3	86.8	101.8	103.9	104.7	105.5
[R].AIVPPYSLCQTGEDLPK.[D]	1xTMT6plex [K17]; 1xTMT6plex [N-Term]; 1xIA-DTB [C9]	Q01804	OTUD4_C686	2798.55	117.9	94.6	101.9	98.8	91.8	94.9
[R].SIAGIDQWLEVFCEQEEK.[W]	1xTMT6plex [K18]; 1xTMT6plex [N-Term]; 1xIA-DTB [C13]	Q01831	XPC_C536	3091.62	111.2	94.6	121.9	98.2	81.2	92.8
[R].GCSHPGGSADGPAK.[K]	1xTMT6plex [K14]; 1xTMT6plex [N-Term]; 1xIA-DTB [C2]	Q01831	XPC_C60	2208.16	143.6	82.5	82.6	102.4	85.5	103.5
[R].AGDWQCPNPGCGNQNFAWR.[T]	1xCarbamidomethyl [C6]; 1xTMT6plex [N-Term]; 1xIA-DTB [C11]	Q01844	EWS_C529	2916.36	74.2	92.1	95.9	124.3	128.8	84.7
[K].SFLACLDGK.[T]	1xTMT6plex [K9]; 1xTMT6plex [N-Term]; 1xIA-DTB [C5]	Q02040	AK17A_C95	1921.1	77.6	102.7	104.1	109.1	96.9	109.6
[R].GPVGNEPLVTDVVLQSFPPLPSCEILDINDEQTLPR.[L]	1xTMT6plex [N-Term]; 1xIA-DTB [C23]	Q02241	KIF23_C483	4640.45	84.9	95.1	133.5	94.6	77.7	114.3
[R].CMALSTAVLVGEAK.[K]	1xTMT6plex [K14]; 1xTMT6plex [N-Term]; 1xIA-DTB [C1]	Q02252	MMSA_C317	2360.34	80.6	115.2	117.2	100.1	86.2	100.7
[K].LQAFSAAIESCNK.[A]	1xTMT6plex [K13]; 1xTMT6plex [N-Term]; 1xIA-DTB [C11]	Q02790	FKBP4_C342	2349.3	96.1	93	89.6	123.2	111.4	86.7
[K].LQTTLTCNSMVLFDHMGCLK.[K]	1xCarbamidomethyl [C7]; 1xTMT6plex [K20]; 1xTMT6plex [N-Term]; 1xIA-DTB [C18]	Q02880	TOP2B_C1029	3279.71	86.7	99.7	108.1	105	102.3	98.1
[R].WDVCLTLSEK.[G]	1xTMT6plex [K10]; 1xTMT6plex [N-Term]; 1xIA-DTB [C4]	Q02880	TOP2B_C321	2161.21	101.3	96	82.8	118.1	112.9	88.8
[K].AASNCGIVESILNWVK.[F]	1xTMT6plex [K16]; 1xTMT6plex [N-Term]; 1xIA-DTB [C5]	Q02880	TOP2B_C426	2671.5	110.5	96.3	110.2	90.1	87.1	105.8
[K].SGGCGAGAGVGGGNGALTWVTLFDQNNAAK.[K]	1xTMT6plex [K30]; 1xTMT6plex [N-Term]; 1xIA-DTB [C4]	Q02880	TOP2B_C7	3717.92	102.2	99.3	100.5	100.4	91.5	106.2
[R].AAQLQEALLHCGR.[F]	1xTMT6plex [N-Term]; 1xIA-DTB [C11]	Q03001	DYST_C5394	2148.19	97.6	107.3	102.9	87.8	103.7	100.7
[R].DINTEQGQNVLEILQDCFEEK.[S]	1xTMT6plex [K21]; 1xTMT6plex [N-Term]; 1xIA-DTB [C17]	Q03188	CENPC_C41	3432.77	102.4	104.7	102.2	94.8	94.3	101.6
[K].MLDPGLMTCSK.[Q]	1xTMT6plex [K11]; 1xTMT6plex [N-Term]; 1xIA-DTB [C9]	Q03701	CEBPZ_C560	2163.17	80.1	100	114.9	103.7	93.9	107.5
[R].LQGINCGPDFTPSFANLGR.[T]	1xTMT6plex [N-Term]; 1xIA-DTB [C6]	Q04637	IF4G1_C662	2745.43	80.2	100.1	111.2	97.3	98.2	112.9
[R].LLDEYNVTPSPPGTVLTSALSPVICGPNR.[S]	1xTMT6plex [N-Term]; 1xIA-DTB [C25]	Q04721	NOTC2_C2085	3749.01	86	101.6	109.6	97	96.4	109.5
[K].GSIAQPAGAPQPQSTCPPAVAGPLPTMYQIPEMAR.[L]	1xTMT6plex [N-Term]; 1xIA-DTB [C16]	Q04721	NOTC2_C2328	4271.2	127.7	79.9	107.9	92.1	80.4	111.9
[R].GFGHIGIAVPDVYSACK.[R]	1xTMT6plex [K17]; 1xTMT6plex [N-Term]; 1xIA-DTB [C16]	Q04760	LGUL_C139	2701.49	136.6	92.1	60.5	78.8	128.4	103.6
[K].CDFPIMK.[F]	1xTMT6plex [K7]; 1xTMT6plex [N-Term]; 1xIA-DTB [C1]	Q04760	LGUL_C61	1821.02	100.9	106.9	85.3	93.8	115.3	97.8
[K].NCNDFQYESK.[V]	1xTMT6plex [K10]; 1xTMT6plex [N-Term]; 1xIA-DTB [C2]	Q04917	1433F_C112	2215.12	69	105.1	109.5	110	100.4	106
[K].AACSAAAMEEDSEASSSR.[I]	1xTMT6plex [N-Term]; 1xIA-DTB [C3]	Q05086	UBE3A_C198	2511.17	117	96.9	87.1	86.6	115.5	96.9
[R].LPTSHTCFNVLLLPEYSSK.[E]	1xTMT6plex [K19]; 1xTMT6plex [N-Term]; 1xIA-DTB [C7]	Q05086	UBE3A_C843	3116.72	115.9	76.5	75.9	72.3	120.7	138.7
[K].VLMSVQYFLEDVDCK.[Q]	1xTMT6plex [K15]; 1xTMT6plex [N-Term]; 1xIA-DTB [C14]	Q05655	KPCD_C127	2756.48	88.7	92.9	117.4	96	101	104
[K].VLMSVQYFLEDVDCK.[Q]	1xOxidation [M3]; 1xTMT6plex [K15]; 1xTMT6plex [N-Term]; 1xIA-DTB [C14]	Q05655	KPCD_C127	2772.47	87	103.8	105.6	104.3	96.3	102.9
[R].ATFYAAEIMCGLQFLHSK.[G]	1xTMT6plex [K18]; 1xTMT6plex [N-Term]; 1xIA-DTB [C10]	Q05655	KPCD_C459	2997.61	127.9	108.2	80.2	100	92.2	91.4
[R].YATTGKCELENCQPFVVETLHGK.[I]	1xCarbamidomethyl [C12]; 2xTMT6plex [K6; K23]; 1xTMT6plex [N-Term]; 1xIA-DTB [C7]	Q06203	PUR1_C100	3821.03	67.9	106.6	116.1	72	76.8	160.7
[K].CELENCQPFVVETLHGK.[I]	1xCarbamidomethyl [C6]; 1xTMT6plex [K17]; 1xTMT6plex [N-Term]; 1xIA-DTB [C1]	Q06203	PUR1_C100	2970.56	103.7	117.5	98.5	82.5	91.1	106.8
[K].KHDIMIQENGNGLECFEK.[S]	2xTMT6plex [K1; K18]; 1xTMT6plex [N-Term]; 1xIA-DTB [C15]	Q06203	PUR1_C496	3301.76	22.4	112.9	155.9	115.7	125	68.1
[R].GYDSAGVGFDGGNDKDWEANACK.[I]	2xTMT6plex [K15; K23]; 1xTMT6plex [N-Term]; 1xIA-DTB [C22]	Q06210	GFPT1_C55	3572.77	95.7	84.2	115.4	107.3	105.8	91.6
[R].IIQFQATPCPK.[E]	1xTMT6plex [K11]; 1xTMT6plex [N-Term]; 1xIA-DTB [C9]	Q06330	SUH_C313	2213.29	97.7	92.7	96.6	115.8	105.4	91.8
[R].ANEKEPCCWWLAK.[V]	1xCarbamidomethyl [C8]; 2xTMT6plex [K4; K13]; 1xTMT6plex [N-Term]; 1xIA-DTB [C7]	Q06787	FMR1_C77	2831.53	104	100.2	99.5	98.3	96.2	101.8
[K].HGEVCPAGWKPGSDTIKPDVQK.[S]	3xTMT6plex [K10; K17; K22]; 1xTMT6plex [N-Term]; 1xIA-DTB [C5]	Q06830	PRDX1_C173	3775.11	72.8	99.2	106.8	102.1	110.8	108.3
[K].KLNCQVIGASVDSHFCHLAWVNTPK.[K]	1xCarbamidomethyl [C4]; 2xTMT6plex [K1; K25]; 1xTMT6plex [N-Term]; 1xIA-DTB [C16]	Q06830	PRDX1_C83	4021.19	159.6	53.1	84.6	96.9	100.6	105.1
[K].LNCQVIGASVDSHFCHLAWVNTPK.[K]	1xTMT6plex [K24]; 1xTMT6plex [N-Term]; 1xIA-DTB [C15]	Q06830	PRDX1_C83	3606.91	162.6	49.8	90.6	92.2	93.9	110.9
[K].LNCQVIGASVDSHFCHLAWVNTPK.[K]	1xCarbamidomethyl [C3]; 1xTMT6plex [K24]; 1xTMT6plex [N-Term]; 1xIA-DTB [C15]	Q06830	PRDX1_C83	3663.93	166.1	55.9	88.6	96.5	84.7	108.1
[K].SSSSSSASAAAAAAAASSSASCSR.[R]	1xTMT6plex [N-Term]; 1xIA-DTB [C22]	Q07065	CKAP4_C100	2771.34	150.1	171.1	64.1	68.2	73.8	72.8
[R].NAVIGLNLYCGGAGLGAGSGGATRPGGR.[L]	1xTMT6plex [N-Term]; 1xIA-DTB [C10]	Q07820	MCL1_C16	3254.74	110.4	142.8	52.6	49.2	114.2	130.8
[R].LASEIPVLEEFPLVPICVADK.[I]	1xTMT6plex [K21]; 1xTMT6plex [N-Term]; 1xIA-DTB [C17]	Q07864	DPOE1_C1612	3249.86	112.2	84.8	120.1	104.4	92.9	85.6
[R].IHCGLQDSQK.[A]	1xTMT6plex [K10]; 1xTMT6plex [N-Term]; 1xIA-DTB [C3]	Q07864	DPOE1_C1935	2096.17	20.4	96.3	189.5	96.7	155.7	41.4
[K].LGYDPVELDPEDMCR.[M]	1xTMT6plex [N-Term]; 1xIA-DTB [C14]	Q07864	DPOE1_C445	2490.22	90.6	99.7	112.9	91.5	96.7	108.5
[R].RLCQENQWLRDELANTQQK.[L]	1xTMT6plex [K19]; 1xTMT6plex [N-Term]; 1xIA-DTB [C3]	Q07866	KLC1_C114	3340.79	91.3	107.2	83.5	115.4	117.7	84.9
[RK].SINPPCVPFFGIYLTNILK.[T]	1xTMT6plex [K19]; 1xTMT6plex [N-Term]; 1xIA-DTB [C6]	Q07889	SOS1_C926	3103.78	82.2	101	88.1	97.3	115.7	115.7
[K].SSVNCPFSSQDMK.[Y]	1xTMT6plex [K13]; 1xTMT6plex [N-Term]; 1xIA-DTB [C5]	Q08211	DHX9_C1029	2397.23	74.6	106.8	104.1	100	103.9	110.8
[K].LQISHEAAACITGLR.[A]	1xTMT6plex [N-Term]; 1xIA-DTB [C10]	Q08211	DHX9_C1099	2321.3	96.2	80.8	86.6	120.7	118.2	97.5
[K].FGGQLLSFDIGDQPVFEIPLSNVSQCTTGK.[N]	1xTMT6plex [K30]; 1xTMT6plex [N-Term]; 1xIA-DTB [C26]	Q08945	SSRP1_C139	4165.2	101	103.2	107.3	93.8	99.8	95
[K].QLPCIPLVENLLK.[D]	1xTMT6plex [K13]; 1xTMT6plex [N-Term]; 1xIA-DTB [C4]	Q08AD1	CAMP2_C241	2447.48	89	81.2	118.6	100.5	99.9	110.8
[K].IACNLAWLVAK.[A]	1xTMT6plex [K11]; 1xTMT6plex [N-Term]; 1xIA-DTB [C3]	Q08AD1	CAMP2_C34	2169.3	81.1	93.7	97.5	94.4	115.7	117.7
[R].CYLLVHQAK.[R]	1xTMT6plex [K9]; 1xTMT6plex [N-Term]; 1xIA-DTB [C1]	Q08J23	NSUN2_C221	2042.2	97.2	122.4	92.7	95.5	108.3	83.9
[R].MVYSTCSLNPIEDEAVIASLLEK.[S]	1xTMT6plex [K23]; 1xTMT6plex [N-Term]; 1xIA-DTB [C6]	Q08J23	NSUN2_C321	3492.87	88.5	81.2	138.4	102.5	80.5	109
[R].MVYSTCSLNPIEDEAVIASLLEK.[S]	1xOxidation [M1]; 1xTMT6plex [K23]; 1xTMT6plex [N-Term]; 1xIA-DTB [C6]	Q08J23	NSUN2_C321	3508.87	78.3	80	135.4	118.3	81.6	106.4
[K].DGVCGPPPSKK.[M]	2xTMT6plex [K10; K11]; 1xTMT6plex [N-Term]; 1xIA-DTB [C4]	Q08J23	NSUN2_C502	2281.33	85.9	103.3	98.3	108.1	107	97.5
[K].YEPDSANPDALQCPIVLCGWR.[G]	1xCarbamidomethyl [C13]; 1xTMT6plex [N-Term]; 1xIA-DTB [C18]	Q08J23	NSUN2_C678	3142.57	112.3	110.6	93.4	106.3	85	92.5
[K].SACSLESNLEGLAGVLEADLPNYK.[S]	1xTMT6plex [K24]; 1xTMT6plex [N-Term]; 1xIA-DTB [C3]	Q09161	NCBP1_C44	3460.84	78.8	105.6	121	95.1	90.4	109.1
[R].ILDIVPPTFSALCPANPTCIYK.[Y]	1xCarbamidomethyl [C13]; 1xTMT6plex [K22]; 1xTMT6plex [N-Term]; 1xIA-DTB [C19]	Q09161	NCBP1_C483	3400.88	99.8	52	114.7	109.7	123.9	99.9
[R].TQIVDCAAVANWIFSSELSR.[D]	1xTMT6plex [N-Term]; 1xIA-DTB [C6]	Q09161	NCBP1_C616	2948.55	89.7	90.6	98.3	116.8	98.4	106.2
[R].KLEFSPQTLCCYGK.[Q]	1xCarbamidomethyl [C11]; 2xTMT6plex [K1; K14]; 1xTMT6plex [N-Term]; 1xIA-DTB [C10]	Q09472	EP300_C1176	2870.59	97.6	105.4	109.9	89.5	87.5	110
[R].LIAGPAANSLPPIVDPDPLIPCDLMDGR.[D]	1xTMT6plex [N-Term]; 1xIA-DTB [C22]	Q09472	EP300_C1621	3608.94	100.2	83.4	108.9	116.7	89.2	101.6
[K].LEGDLTGPSVGVEVPDVELECPDAK.[L]	1xTMT6plex [K25]; 1xTMT6plex [N-Term]; 1xIA-DTB [C21]	Q09666	AHNK_C1900	3535.86	99.2	79.1	99.1	113.2	109.5	99.9
[K].DVSALFPDVVNCMQTDNLELKK.[L]	2xTMT6plex [K21; K22]; 1xTMT6plex [N-Term]; 1xIA-DTB [C12]	Q10567	AP1B1_C57	3676.01	85.2	89.9	106.5	98.2	92.1	128
[K].VYAVATSTNTPCAR.[I]	1xTMT6plex [N-Term]; 1xIA-DTB [C12]	Q10570	CPSF1_C1044	2192.17	92.1	98.5	107.1	105.8	97.1	99.5
[R].IVSCGNAIIAELLR.[L]	1xTMT6plex [N-Term]; 1xIA-DTB [C4]	Q12768	WASC5_C21	2210.29	96.7	91.7	97.1	110.6	111.4	92.6
[R].QIEILELEDLEKECSLAR.[I]	1xTMT6plex [K12]; 1xTMT6plex [N-Term]; 1xIA-DTB [C14]	Q12769	NU160_C1187	3098.72	79.8	82.9	107.9	103.6	105.2	120.7
[R].EMYLQSLFTPGQFTNEALCK.[A]	1xTMT6plex [K20]; 1xTMT6plex [N-Term]; 1xIA-DTB [C19]	Q12769	NU160_C473	3287.72	84.8	111	74.2	99.8	113.1	117.1
[R].EMYLQSLFTPGQFTNEALCK.[A]	1xOxidation [M2]; 1xTMT6plex [K20]; 1xTMT6plex [N-Term]; 1xIA-DTB [C19]	Q12769	NU160_C473	3303.72	108.1	110	91.1	88.7	91.8	110.2
[K].LWALQDFSCLK.[T]	1xTMT6plex [K11]; 1xTMT6plex [N-Term]; 1xIA-DTB [C9]	Q12788	TBL3_C555	2291.3	94.6	83.3	76.5	92.2	134.5	118.9
[R].FPSTICTESFQFLDR.[M]	1xTMT6plex [N-Term]; 1xIA-DTB [C6]	Q12789	TF3C1_C1520	2529.3	110.7	105.3	106.5	91.5	97.3	88.8
[R].VVDGHLNLPVCK.[G]	1xTMT6plex [K12]; 1xTMT6plex [N-Term]; 1xIA-DTB [C11]	Q12789	TF3C1_C1999	2261.32	94.9	106.6	111.6	91.9	88.9	106
[R].AGVRPSSSGSAWEACSEAPSK.[G]	1xTMT6plex [K21]; 1xTMT6plex [N-Term]; 1xIA-DTB [C15]	Q12789	TF3C1_C853	3031.57	97.8	104.5	102.1	95.4	96.8	103.4
[R].LCYMGLLQFGPTEK.[F]	1xTMT6plex [K14]; 1xTMT6plex [N-Term]; 1xIA-DTB [C2]	Q12789	TF3C1_C973	2567.41	99.4	106.2	98.8	96.2	93.8	105.6
[K].IAQLFSISPCQISQIYK.[Q]	1xTMT6plex [K17]; 1xTMT6plex [N-Term]; 1xIA-DTB [C10]	Q12800	TFCP2_C453	2906.66	96.3	109.8	92.8	102.2	102.7	96.2
[R].NTGDADQWCPLLETLTDAEMEKK.[I]	2xTMT6plex [K22; K23]; 1xTMT6plex [N-Term]; 1xIA-DTB [C9]	Q12824	SNF5_C350	3804.98	91.9	123.4	131	75.6	88.7	89.4
[K].LASADDIGTLICK.[N]	1xTMT6plex [K13]; 1xTMT6plex [N-Term]; 1xIA-DTB [C12]	Q12830	BPTF_C1357	2287.31	116.7	92.2	78.1	119	117	76.9
[R].MIVCNQVMK.[Y]	1xTMT6plex [K9]; 1xTMT6plex [N-Term]; 1xIA-DTB [C4]	Q12830	BPTF_C2697	2033.15	82.6	91.2	103.4	103.8	93.5	125.5
[R].KHPNEICVPMSVEFEELLK.[A]	2xTMT6plex [K1; K19]; 1xTMT6plex [N-Term]; 1xIA-DTB [C7]	Q12874	SF3A3_C103	3438.91	64.9	107.8	110.3	101.3	110.1	105.6
[R].KHPNEICVPMSVEFEELLK.[A]	1xOxidation [M10]; 2xTMT6plex [K1; K19]; 1xTMT6plex [N-Term]; 1xIA-DTB [C7]	Q12874	SF3A3_C103	3454.9	79.8	105.3	105.8	113.9	98.3	97
[K].HPNEICVPMSVEFEELLK.[A]	1xTMT6plex [K18]; 1xTMT6plex [N-Term]; 1xIA-DTB [C6]	Q12874	SF3A3_C103	3081.65	95.6	92.4	116.6	102.5	95.9	97
[K].ALIERPSQNNIGIQTMECSLR.[V]	1xTMT6plex [N-Term]; 1xIA-DTB [C18]	Q12888	TP53B_C1159	3111.66	125.3	96.5	85.9	107.9	100.2	84.2
[K].GDSGAAPDVDDKLCLR.[M]	1xTMT6plex [K12]; 1xTMT6plex [N-Term]; 1xIA-DTB [C14]	Q12888	TP53B_C986	2599.39	115.8	90.6	92.7	114.9	97.2	88.7
[R].CLQILAAGLFLPGSVGITDPCESGNFR.[V]	1xCarbamidomethyl [C1]; 1xTMT6plex [N-Term]; 1xIA-DTB [C21]	Q12905	ILF2_C291	3573.88	80	104.8	113.5	106.9	91.4	103.3
[R].GGPGGGFRPFVPHIPFDFYLCEMAFPR.[V]	1xTMT6plex [N-Term]; 1xIA-DTB [C21]	Q12905	ILF2_C37	3749.91	78.9	106.8	99.2	90.5	110.4	114.1
[K].GDLDLELVLLCK.[E]	1xTMT6plex [K12]; 1xTMT6plex [N-Term]; 1xIA-DTB [C11]	Q12906	ILF3_C116	2298.35	125.1	75.4	93.1	115.6	108.7	82
[K].EHVPVTPQCTLSDQNAQGQGPEK.[V]	1xTMT6plex [K23]; 1xTMT6plex [N-Term]; 1xIA-DTB [C9]	Q12923	PTN13_C1467	3430.78	34.2	114.6	123.9	118.5	142.8	66
[K].SQEDTICTMFYYPQK.[I]	1xTMT6plex [K15]; 1xTMT6plex [N-Term]; 1xIA-DTB [C7]	Q12923	PTN13_C1705	2821.43	99.3	109.3	100.9	96.3	82.2	111.9
[K].LVLGNLSGTDQLSCNSEQKPDR.[S]	1xTMT6plex [K19]; 1xTMT6plex [N-Term]; 1xIA-DTB [C14]	Q12923	PTN13_C188	3341.79	87.8	102.2	111.6	103.9	93	101.5
[R].LSCSELSLYQPLQNSSK.[E]	1xTMT6plex [K17]; 1xTMT6plex [N-Term]; 1xIA-DTB [C3]	Q12923	PTN13_C937	2864.56	88.6	100.8	104.4	98.9	89.3	118
[K].TATFENIVCVLNR.[E]	1xTMT6plex [N-Term]; 1xIA-DTB [C9]	Q12933	TRAF2_C287	2218.22	77.2	93.9	109.1	112.8	103	104.1
[R].IGLNNSPVNGNSSCQMAFPSSQSLYR.[T]	1xTMT6plex [N-Term]; 1xIA-DTB [C14]	Q12948	FOXC1_C529	3509.75	89.3	124.2	93.2	71.7	85.9	135.8
[R].GCVNPMINIEQLWR.[D]	1xTMT6plex [N-Term]; 1xIA-DTB [C2]	Q12996	CSTF3_C176	2411.29	124.8	81.4	83.1	105.3	113.9	91.5
[K].LCNEEQELLR.[F]	1xTMT6plex [N-Term]; 1xIA-DTB [C2]	Q13042	CDC16_C194	1985.07	73.3	106.2	123.4	94.9	90	112.1
[R].TGLCYLPEELAALQK.[L]	1xTMT6plex [K15]; 1xTMT6plex [N-Term]; 1xIA-DTB [C4]	Q13045	FLII_C46	2616.48	91.7	101.6	103.3	98	107.1	98.3
[K].EMAQYASNITSVLCQFPSQQIANILDSHAATLNR.[K]	1xTMT6plex [N-Term]; 1xIA-DTB [C14]	Q13085	ACACA_C934	4473.29	98.9	73	101.4	91.1	100.6	135
[K].VSVTFDPFCYLTLPLPLKK.[D]	2xTMT6plex [K18; K19]; 1xTMT6plex [N-Term]; 1xIA-DTB [C9]	Q13107	UBP4_C475	3377.99	98.1	101.8	78.2	116.6	96.3	109.1
[K].LAFPGETLSDIPCKTEEEGVGCGGAGR.[R]	1xCarbamidomethyl [C13]; 1xTMT6plex [K14]; 1xTMT6plex [N-Term]; 1xIA-DTB [C22]	Q13111	CAF1A_C190	3717.9	118.9	114.7	91.7	88.1	94.7	91.8
[K].GNLCYILNK.[Y]	1xTMT6plex [K9]; 1xTMT6plex [N-Term]; 1xIA-DTB [C4]	Q13129	RLF_C1300	2005.17	132.2	115.9	89.5	83.9	88.4	90
[K].ICDGIFYTPQYLNPSVISLLK.[H]	1xTMT6plex [K21]; 1xTMT6plex [N-Term]; 1xIA-DTB [C2]	Q13131	AAPK1_C238	3351.88	67.8	86.9	114.1	117.6	127.8	85.8
[R].YCALLLPLLK.[A]	1xTMT6plex [K10]; 1xTMT6plex [N-Term]; 1xIA-DTB [C2]	Q13144	EI2BE_C618	2114.32	94.2	95.2	101.9	105.5	97.3	105.8
[R].AFAFVTFADDQIAQSLCGEDLIIK.[G]	1xTMT6plex [K24]; 1xTMT6plex [N-Term]; 1xIA-DTB [C17]	Q13148	TADBP_C244	3582.93	86.7	104.5	110.1	93.8	90.6	114.2
[R].VTEDENDEPIEIPSEDDGTVLLSTVTAQFPGACGLR.[Y]	1xTMT6plex [N-Term]; 1xIA-DTB [C33]	Q13148	TADBP_C39	4556.26	76	90.8	115.7	109.9	95.8	111.8
[R].SCENLAPFNTALK.[L]	1xTMT6plex [K13]; 1xTMT6plex [N-Term]; 1xIA-DTB [C2]	Q13155	AIMP2_C306	2375.32	77.4	95.1	107	107	100.1	113.3
[R].RVDDFEAGAAAGAAPGEEDLCAAFNVICDNVGKDWR.[R]	1xCarbamidomethyl [C28]; 1xTMT6plex [K33]; 1xTMT6plex [N-Term]; 1xIA-DTB [C21]	Q13158	FADD_C98	4777.35	86.2	93.2	128.3	84	83.4	124.9
[R].LTWHSCPEDEAQ.[-]	1xTMT6plex [N-Term]; 1xIA-DTB [C6]	Q13185	CBX3_C177	2154.05	96.6	90.1	104.7	109.9	95.6	103.1
[K].SGALLACGIVNSGVR.[N]	1xTMT6plex [N-Term]; 1xIA-DTB [C7]	Q13200	PSMD2_C448	2155.22	83	95	85.5	112.9	130.1	93.6
[K].SIVFFSSCK.[E]	1xTMT6plex [K9]; 1xTMT6plex [N-Term]; 1xIA-DTB [C8]	Q13206	DDX10_C323	1985.13	96.7	112.1	86.7	106.3	108.9	89.2
[R].WQFDIECDK.[T]	1xTMT6plex [K9]; 1xTMT6plex [N-Term]; 1xIA-DTB [C7]	Q13257	MD2L1_C106	2151.13	99.7	97.4	86	117	94.1	105.8
[K].ALYDTFSAFGNILSCK.[V]	1xTMT6plex [K16]; 1xTMT6plex [N-Term]; 1xIA-DTB [C15]	Q13310	PABP4_C128	2717.47	121.8	93.3	79.4	108	119.6	77.9
[R].LAMDFGGAGAAQQGLTDSCQSGGVPTAVQNLAPR.[A]	1xTMT6plex [N-Term]; 1xIA-DTB [C19]	Q13310	PABP4_C494	4027.03	106.7	97.6	98.6	97	106	94.1
[K].IDPENAEFLTALCELR.[L]	1xTMT6plex [N-Term]; 1xIA-DTB [C13]	Q13325	IFIT5_C476	2572.36	84.7	93.7	109.7	101.3	100.2	110.2
[K].SAGDLGIAVCNVPAASVEETADSTLCHILNLYR.[R]	1xCarbamidomethyl [C10]; 1xTMT6plex [N-Term]; 1xIA-DTB [C26]	Q13363	CTBP1_C134	4198.15	118.3	94.3	103.2	100.5	92.2	91.5
[R].CAPASSSVPAEAELAGEGISVNTGPK.[G]	1xTMT6plex [K26]; 1xTMT6plex [N-Term]; 1xIA-DTB [C1]	Q13371	PHLP_C35	3409.8	88.3	103.1	95.9	100.6	107.4	104.7
[K].SLDLTQYCFPEK.[S]	1xTMT6plex [K12]; 1xTMT6plex [N-Term]; 1xIA-DTB [C8]	Q13395	TARB1_C1556	2411.3	87.2	90.9	110.7	103	97.2	111.1
[R].SPGQPIGSCSPLGLK.[L]	1xTMT6plex [K15]; 1xTMT6plex [N-Term]; 1xIA-DTB [C9]	Q13395	TARB1_C443	2408.37	96.6	109.7	98.5	102.1	90.8	102.3
[R].HWCAVPILFLSK.[A]	1xTMT6plex [K12]; 1xTMT6plex [N-Term]; 1xIA-DTB [C3]	Q13395	TARB1_C483	2381.39	100.6	129.7	93.6	89.8	90.2	96
[K].AVAVTSMSFPVGDVNNFVVGSEEGSVYTACR.[H]	1xTMT6plex [N-Term]; 1xIA-DTB [C30]	Q13409	DC1I2_C460	3930.96	149.2	76.2	105.4	74.7	99.3	95.3
[K].GAGNPQASTLALQSNITQCLLGQPWPLNEAQVQASVVK.[V]	1xTMT6plex [K38]; 1xTMT6plex [N-Term]; 1xIA-DTB [C19]	Q13428	TCOF_C1298	4899.66	98.2	91.8	117.8	92.8	81.5	117.8
[K].CFLAQPVTLLDIYTHWQQTSELGR.[K]	1xTMT6plex [N-Term]; 1xIA-DTB [C1]	Q13428	TCOF_C38	3557.88	88.7	83	108.9	100.5	117.3	101.6
[R].NMVHPNVICDGCNGPVVGTR.[Y]	1xCarbamidomethyl [C9]; 1xTMT6plex [N-Term]; 1xIA-DTB [C12]	Q13501	SQSTM_C131	2877.45	52.5	95.2	126.6	93.1	98.4	134.2
[K].VTVMSTINPTKDLLADLIGCQR.[L]	1xTMT6plex [K11]; 1xTMT6plex [N-Term]; 1xIA-DTB [C20]	Q13523	PRP4B_C962	3355.88	68.7	108.2	125.7	78.8	86.2	132.4
[K].SGEEDFESLASQFSDCSSAK.[A]	1xTMT6plex [K20]; 1xTMT6plex [N-Term]; 1xIA-DTB [C16]	Q13526	PIN1_C113	3091.49	100.2	111.9	99.6	79.1	91.7	117.5
[K].IKSGEEDFESLASQFSDCSSAK.[A]	2xTMT6plex [K2; K22]; 1xTMT6plex [N-Term]; 1xIA-DTB [C18]	Q13526	PIN1_C113	3561.84	98.3	117.6	107.7	70.8	88.9	116.7
[R].AQDSAAYAIQELLSIYDCR.[E]	1xTMT6plex [N-Term]; 1xIA-DTB [C18]	Q13535	ATR_C1430	2868.48	88.6	105.3	121.3	99.7	94.1	91
[R].FNVGEDCPVFDGLFEFCQLSTGGSVASAVK.[L]	1xCarbamidomethyl [C17]; 1xTMT6plex [K30]; 1xTMT6plex [N-Term]; 1xIA-DTB [C7]	Q13547	HDAC1_C100	4148.09	91.5	96	110.7	93.7	99.9	108.1
[R].CDQDAQNPLSAGLQGACLMETVELLQAK.[V]	1xCarbamidomethyl [C17]; 1xOxidation [M19]; 1xTMT6plex [K28]; 1xTMT6plex [N-Term]; 1xIA-DTB [C1]	Q13561	DCTN2_C240	3987.04	112.9	104.1	98.7	81.4	101.9	101
[R].LADVLWNSQIPLLICR.[T]	1xTMT6plex [N-Term]; 1xIA-DTB [C15]	Q13564	ULA1_C153	2592.49	67	79.6	91.7	133.7	137.4	90.6
[K].CIYEIFSK.[E]	1xTMT6plex [K8]; 1xTMT6plex [N-Term]; 1xIA-DTB [C1]	Q13569	TDG_C233	1970.12	93.5	124.8	81.9	82.8	103.8	113.2
[K].MGVLFCSSCCPDLPFIYAFGGQK.[E]	2xCarbamidomethyl [C6; C9]; 1xTMT6plex [K23]; 1xTMT6plex [N-Term]; 1xIA-DTB [C10]	Q13610	PWP1_C439	3564.79	88	88.5	86.2	116.1	109.7	111.5
[R].QPSVETLDSPTGSHVEWCK.[Q]	1xTMT6plex [K19]; 1xTMT6plex [N-Term]; 1xIA-DTB [C18]	Q13613	MTMR1_C58	3067.59	157.2	102.1	78.3	65.4	95.4	101.6
[K].DVTYICPFTGAVR.[G]	1xTMT6plex [N-Term]; 1xIA-DTB [C6]	Q13614	MTMR2_C95	2180.17	95.1	103.8	91.3	94.6	109.9	105.3
[K].YNLEELYQAVENLCSYK.[I]	1xTMT6plex [K17]; 1xTMT6plex [N-Term]; 1xIA-DTB [C14]	Q13620	CUL4B_C248	3046.6	87.5	80.4	103.9	108.7	115.3	104.2
[R].TLQSLACGK.[A]	1xTMT6plex [K9]; 1xTMT6plex [N-Term]; 1xIA-DTB [C7]	Q13620	CUL4B_C787	1888.11	86.6	97.8	88.6	111.3	115.3	100.4
[K].AITSGGITYQDQPWHADCFVCVTCSK.[K]	2xCarbamidomethyl [C18; C21]; 1xTMT6plex [K26]; 1xTMT6plex [N-Term]; 1xIA-DTB [C24]	Q13642	FHL1_C191	3911.93	115.6	83.3	114.1	85	88.3	113.7
[R].FTAVEDQYYCVDCYK.[N]	1xCarbamidomethyl [C10]; 1xTMT6plex [K15]; 1xTMT6plex [N-Term]; 1xIA-DTB [C13]	Q13642	FHL1_C212	2871.41	93.3	95.1	109.2	97.1	94.6	110.7
[K].CLHPLANETFVAK.[D]	1xTMT6plex [K13]; 1xTMT6plex [N-Term]; 1xIA-DTB [C1]	Q13642	FHL1_C71	2410.37	65.1	80.4	137.7	101.1	105.2	110.4
[R].ACNFFNNVGGNLK.[G]	1xTMT6plex [K13]; 1xTMT6plex [N-Term]; 1xIA-DTB [C2]	Q13772	NCOA4_C244	2365.29	133	156.5	35.4	34.1	118.4	122.6
[K].VVTSEALCGVPVLVLANK.[Q]	1xTMT6plex [K18]; 1xTMT6plex [N-Term]; 1xIA-DTB [C8]	Q13795	ARFRP_C125	2779.65	105.7	91.7	105.6	103.5	100	93.6
[R].TYLLDGSCMVEESGTLESQLEATK.[R]	1xTMT6plex [K24]; 1xTMT6plex [N-Term]; 1xIA-DTB [C8]	Q13813	SPTN1_C2233	3571.83	87.6	89.9	115.4	98.5	107.3	101.3
[K].KVCNVAPIAGETK.[V]	2xTMT6plex [K1; K13]; 1xTMT6plex [N-Term]; 1xIA-DTB [C3]	Q13823	NOG2_C336	2526.5	98	102.2	99	105.1	103.5	92.2
[K].VCNVAPIAGETK.[V]	1xTMT6plex [K12]; 1xTMT6plex [N-Term]; 1xIA-DTB [C2]	Q13823	NOG2_C336	2169.25	72.7	102.5	107	112.1	103.1	102.6
[R].ELPVLWHQCLLTLVQR.[Y]	1xTMT6plex [N-Term]; 1xIA-DTB [C9]	Q13895	BYST_C381	2686.54	92	98.1	104.1	104.1	95.6	106.2
[K].MPPPDLPLWQDCHELWSK.[K]	1xTMT6plex [K18]; 1xTMT6plex [N-Term]; 1xIA-DTB [C12]	Q14004	CDK13_C1017	3159.65	123.3	95.1	103.9	84.1	91.1	102.6
[K].EGVIGCLDLILK.[W]	1xTMT6plex [K12]; 1xTMT6plex [N-Term]; 1xIA-DTB [C6]	Q14008	CKAP5_C1241	2240.35	94.6	89	102.4	116.1	100.5	97.4
[R].CEMPELVQHK.[L]	1xTMT6plex [K10]; 1xTMT6plex [N-Term]; 1xIA-DTB [C1]	Q14008	CKAP5_C1500	2181.19	86.5	106.3	97.4	100	98.9	111
[K].CGNNAK.[E]	1xTMT6plex [K6]; 1xTMT6plex [N-Term]; 1xIA-DTB [C1]	Q14008	CKAP5_C695	1573.89	84.7	112.8	93.4	100.1	106.5	102.5
[K].ATSITVTGSGSCR.[H]	1xTMT6plex [N-Term]; 1xIA-DTB [C12]	Q14118	DAG1_C713	1978.06	90.1	108.7	103	101	87.6	109.6
[K].TTEEQVQASTPCPR.[T]	1xTMT6plex [N-Term]; 1xIA-DTB [C12]	Q14137	BOP1_C108	2285.18	78.6	97.5	100.8	113	103.3	106.9
[K].KTTEEQVQASTPCPR.[T]	1xTMT6plex [K1]; 1xTMT6plex [N-Term]; 1xIA-DTB [C13]	Q14137	BOP1_C108	2642.43	96.9	98.9	96.9	110.6	110.9	85.8
[R].DLQPFPTCQALVYR.[G]	1xTMT6plex [N-Term]; 1xIA-DTB [C8]	Q14137	BOP1_C404	2389.29	96.8	97.8	110.6	99.3	93.5	102.1
[K].HCILSWLGNCLHANAGR.[T]	1xCarbamidomethyl [C10]; 1xTMT6plex [N-Term]; 1xIA-DTB [C2]	Q14139	UBE4A_C398	2660.39	131.4	99.7	87.1	95.6	93.6	92.5
[R].VFCNFQYAPQLAEALIK.[V]	1xTMT6plex [K17]; 1xTMT6plex [N-Term]; 1xIA-DTB [C3]	Q14139	UBE4A_C710	2922.63	99.3	101.9	100.6	101.3	99.7	97.3
[K].IFEELTLHKPTQVMPCR.[A]	1xTMT6plex [K9]; 1xTMT6plex [N-Term]; 1xIA-DTB [C16]	Q14145	KEAP1_C319	3009.68	92	113.5	99.5	88.8	98.1	108.1
[R].LPSVLISSVSTLLEADLGQHCR.[D]	1xTMT6plex [N-Term]; 1xIA-DTB [C21]	Q14146	URB2_C1132	3076.7	106.1	98.3	98.5	84.1	99.9	113.1
[R].LVMQCILQGLDVSNMWK.[A]	1xOxidation [M15]; 1xTMT6plex [K17]; 1xTMT6plex [N-Term]; 1xIA-DTB [C5]	Q14146	URB2_C1249	2961.61	101.1	89.7	103.4	102.9	100.4	102.5
[R].LVMQCILQGLDVSNMWK.[A]	1xTMT6plex [K17]; 1xTMT6plex [N-Term]; 1xIA-DTB [C5]	Q14146	URB2_C1249	2945.62	103.8	80.9	109.8	135.6	90	79.8
[R].ACPQIVTALTLLNR.[E]	1xTMT6plex [N-Term]; 1xIA-DTB [C2]	Q14146	URB2_C1294	2251.32	107.3	89.8	110.3	89.4	104.5	98.7
[R].AFGDVTAHLLQPCLVLR.[H]	1xTMT6plex [N-Term]; 1xIA-DTB [C13]	Q14146	URB2_C205	2591.47	115.3	88.5	96.3	94.6	103.5	101.8
[K].EHQVVVVAGDTGCGK.[S]	1xTMT6plex [K15]; 1xTMT6plex [N-Term]; 1xIA-DTB [C13]	Q14147	DHX34_C189	2466.35	30.5	94.3	112.7	114.8	159.7	88
[K].VTPDIEESLLEPENEKILDILGETCK.[S]	2xTMT6plex [K16; K26]; 1xTMT6plex [N-Term]; 1xIA-DTB [C25]	Q14151	SAFB2_C224	4124.27	74.5	98.5	105.4	121	114.7	86
[R].SLEPSPSPGPQEEDGEVALVLLGRPSPGAVGPEDVALCSSR.[R]	1xTMT6plex [N-Term]; 1xIA-DTB [C38]	Q14160	SCRIB_C1612	4837.49	97.8	97.2	95	105.9	97.6	106.5
[R].AFTELFQVACAKPPPLGLCDYPSSR.[A]	1xCarbamidomethyl [C10]; 1xTMT6plex [K12]; 1xTMT6plex [N-Term]; 1xIA-DTB [C19]	Q14166	TTL12_C572	3734.98	97.1	85.4	107.9	98.1	102	109.5
[R].VMQPQILEVNFNPDCER.[A]	1xTMT6plex [N-Term]; 1xIA-DTB [C15]	Q14166	TTL12_C612	2770.42	76.6	90.6	111.5	102.3	107.6	111.5
[R].KQQPNPGNELCYK.[V]	2xTMT6plex [K1; K13]; 1xTMT6plex [N-Term]; 1xIA-DTB [C11]	Q14166	TTL12_C98	2715.52	91.2	96	97.5	115.9	103.3	96.1
[K].VLGCPEALTGSYK.[S]	1xTMT6plex [K13]; 1xTMT6plex [N-Term]; 1xIA-DTB [C4]	Q14181	DPOA2_C198	2305.3	90.3	95.5	104	98.9	95.7	115.7
[K].NPLDINPSVDFLFDCGLVGPEDVSTEQDLPR.[T]	1xTMT6plex [N-Term]; 1xIA-DTB [C15]	Q14202	ZMYM3_C1017	4140.08	101	91.5	119.5	99.8	70.8	117.4
[R].LVLSESCSR.[D]	1xTMT6plex [N-Term]; 1xIA-DTB [C7]	Q14202	ZMYM3_C1048	1731.96	115.1	122.3	96.5	86.5	83.6	96.1
[K].ASEQIYGTPSSSPYECLR.[Q]	1xTMT6plex [N-Term]; 1xIA-DTB [C16]	Q14203	DCTN1_C888	2726.37	117.3	82.6	103.5	104.4	98	94.2
[R].MLSAVSQQVQCIQEALR.[E]	1xTMT6plex [N-Term]; 1xIA-DTB [C11]	Q14204	DYHC1_C1977	2642.43	75.1	101.1	124.5	103.4	86.2	109.7
[K].TSAPITCELLNK.[Q]	1xTMT6plex [K12]; 1xTMT6plex [N-Term]; 1xIA-DTB [C7]	Q14204	DYHC1_C1999	2257.3	78.2	104.5	118.5	92.5	92.1	114.2
[R].MNTLLANGEVPGLFEGDEYATLMTQCK.[E]	1xTMT6plex [K27]; 1xTMT6plex [N-Term]; 1xIA-DTB [C26]	Q14204	DYHC1_C3033	3913	81.9	92.5	117.4	91.8	91.1	125.3
[R].CVLNWFGDWSTEALYQVGK.[E]	1xTMT6plex [K19]; 1xTMT6plex [N-Term]; 1xIA-DTB [C1]	Q14204	DYHC1_C3089	3183.67	64.2	99.9	107.2	98	99.1	131.5
[R].WQASSLPADDLCTENAIMLK.[R]	1xTMT6plex [K20]; 1xTMT6plex [N-Term]; 1xIA-DTB [C12]	Q14204	DYHC1_C3573	3173.67	85.7	84.8	108.1	103.3	101.7	116.3
[K].LHSLQPHACFR.[L]	1xTMT6plex [N-Term]; 1xIA-DTB [C9]	Q14204	DYHC1_C4121	2047.12	34.6	96.4	142.9	111.7	157.5	56.8
[R].SACDTVDTWLDDTAK.[G]	1xTMT6plex [K15]; 1xTMT6plex [N-Term]; 1xIA-DTB [C3]	Q14204	DYHC1_C4216	2608.33	80.8	93.6	109.1	94.4	104.6	117.5
[K].NIHVCLGGLFVPEAYITATR.[Q]	1xTMT6plex [N-Term]; 1xIA-DTB [C5]	Q14204	DYHC1_C4510	2912.6	76.4	97.2	105.8	112	86.2	122.5
[K].VQYPQSQACK.[M]	1xTMT6plex [K10]; 1xTMT6plex [N-Term]; 1xIA-DTB [C9]	Q14204	DYHC1_C633	2119.17	91.6	107.2	98.5	89.5	95.3	117.9
[K].ALCHLNVPVTVVLDAAVGYIMEK.[A]	1xTMT6plex [K23]; 1xTMT6plex [N-Term]; 1xIA-DTB [C3]	Q14232	EI2BA_C169	3422.93	108.9	76.2	114.7	98.2	93.7	108.3
[K].ALCHLNVPVTVVLDAAVGYIMEK.[A]	1xOxidation [M21]; 1xTMT6plex [K23]; 1xTMT6plex [N-Term]; 1xIA-DTB [C3]	Q14232	EI2BA_C169	3438.93	112.6	85.8	109.4	101.7	90.5	100.1
[K].VILALGDYMGATCHACIGGTNVR.[N]	1xCarbamidomethyl [C13]; 1xTMT6plex [N-Term]; 1xIA-DTB [C16]	Q14240	IF4A2_C135	3130.62	106.1	91.1	112.2	95.9	87.1	107.4
[K].STAALSGEAASCSPIIMPYK.[A]	1xTMT6plex [K20]; 1xTMT6plex [N-Term]; 1xIA-DTB [C12]	Q14244	MAP7_C253	2964.59	88.5	101.3	105.7	96.2	93.4	115
[K].CALGWDHQEK.[L]	1xTMT6plex [K10]; 1xTMT6plex [N-Term]; 1xIA-DTB [C1]	Q14247	SRC8_C246	2154.15	90.1	113.6	92.5	99.8	102.9	101
[R].QDKCALGWDHQEK.[L]	2xTMT6plex [K3; K13]; 1xTMT6plex [N-Term]; 1xIA-DTB [C4]	Q14247	SRC8_C246	2754.5	64.1	121.4	106.4	98.7	98.5	110.9
[R].LLKPGGVLTYCNLTSWGELMK.[S]	2xTMT6plex [K3; K21]; 1xTMT6plex [N-Term]; 1xIA-DTB [C11]	Q14353	GAMT_C169	3520	110.8	84.5	92	116.2	103.8	92.7
[K].VQEAPIDEHWIIECNDGVFQR.[L]	1xTMT6plex [N-Term]; 1xIA-DTB [C14]	Q14353	GAMT_C91	3236.64	88.1	101.7	115.7	103.1	90.7	100.7
[K].EKPVCGTTYK.[V]	2xTMT6plex [K2; K10]; 1xTMT6plex [N-Term]; 1xIA-DTB [C5]	Q14444	CAPR1_C226	2322.35	108.7	81.1	82.7	122.4	121.3	83.8
[K].GYGFITFSDSECAKK.[A]	2xTMT6plex [K14; K15]; 1xTMT6plex [N-Term]; 1xIA-DTB [C12]	Q14498	RBM39_C303	2849.55	114.1	82.8	101.1	101.2	97.8	103
[K].CPSIAAAIAAVNALHGR.[W]	1xTMT6plex [N-Term]; 1xIA-DTB [C1]	Q14498	RBM39_C478	2373.34	86.4	95.7	91.9	113.2	124.7	88
[K].KGACAVEGSK.[K]	2xTMT6plex [K1; K10]; 1xTMT6plex [N-Term]; 1xIA-DTB [C4]	Q14527	HLTF_C461	2146.26	100.8	108.1	88.7	105	104.6	92.8
[R].LVFLACCVAPTNPR.[F]	1xCarbamidomethyl [C7]; 1xTMT6plex [N-Term]; 1xIA-DTB [C6]	Q14566	MCM6_C301	2299.26	94.7	103.2	105.6	98.9	99.3	98.3
[K].GGNQTLESCR.[G]	1xTMT6plex [N-Term]; 1xIA-DTB [C9]	Q14574	DSC3_C792	1802.94	127.5	104	75.1	86.3	99.5	107.6
[K].TFESTENPDDFLPSVMTCVNYLK.[L]	1xTMT6plex [K23]; 1xTMT6plex [N-Term]; 1xIA-DTB [C18]	Q14669	TRIPC_C1959	3617.83	77.3	91.5	123.4	89.4	110	108.3
[R].KTFESTENPDDFLPSVMTCVNYLK.[L]	2xTMT6plex [K1; K24]; 1xTMT6plex [N-Term]; 1xIA-DTB [C19]	Q14669	TRIPC_C1959	3975.09	96.2	100.8	123.6	82.3	89.7	107.4
[R].SESGGLGVSMVEYVLSSSPGDSCLR.[K]	1xTMT6plex [N-Term]; 1xIA-DTB [C23]	Q14671	PUM1_C234	3254.62	95.8	94	115.3	104.4	86.8	103.8
[K].CIECVQPQSLQFIIDAFK.[G]	1xCarbamidomethyl [C1]; 1xTMT6plex [K18]; 1xTMT6plex [N-Term]; 1xIA-DTB [C4]	Q14671	PUM1_C980	3106.68	77.6	92.1	126.4	94.9	113.8	95.2
[R].AMPVPTTPEFQSPVTTDQPISPEPITQPSCIKR.[Q]	1xTMT6plex [K32]; 1xTMT6plex [N-Term]; 1xIA-DTB [C30]	Q14676	MDC1_C1720	4560.42	113.6	103.2	94.8	100.1	96.4	91.8
[R].AAGNPGSLAAPIDHKPCSAPLEPK.[S]	2xTMT6plex [K15; K24]; 1xTMT6plex [N-Term]; 1xIA-DTB [C17]	Q14676	MDC1_C1742	3537.98	120.1	87.7	88.4	100.6	104.6	98.6
[R].FNACFESVATNIDEIYK.[A]	1xTMT6plex [K17]; 1xTMT6plex [N-Term]; 1xIA-DTB [C4]	Q14683	SMC1A_C1073	2931.53	82.4	100.5	90.9	114.7	109.9	101.6
[K].AESLIGVYPEQGDCVISK.[V]	1xTMT6plex [K18]; 1xTMT6plex [N-Term]; 1xIA-DTB [C14]	Q14683	SMC1A_C1210	2875.56	104.2	81.8	114.9	105.7	91.2	102.2
[K].EVLCPESQSPNGVR.[F]	1xTMT6plex [N-Term]; 1xIA-DTB [C4]	Q14684	RRP1B_C155	2253.19	99.5	116.5	98.2	77.2	93.4	115.2
[K].FIDPFCK.[I]	1xTMT6plex [K7]; 1xTMT6plex [N-Term]; 1xIA-DTB [C6]	Q14684	RRP1B_C197	1837.04	69.6	81.1	130.2	147	86.5	85.6
[R].GRDDCGTFEDTGPLLQFDYK.[A]	1xTMT6plex [K20]; 1xTMT6plex [N-Term]; 1xIA-DTB [C5]	Q14684	RRP1B_C286	3244.63	105.4	83.7	108	110.6	94.7	97.5
[R].VFCVEEEDSESSLQK.[R]	1xTMT6plex [K15]; 1xTMT6plex [N-Term]; 1xIA-DTB [C3]	Q14684	RRP1B_C386	2696.39	100.8	89.1	97	116.8	106.7	89.5
[K].KAGPGSLELCGLPSQK.[T]	2xTMT6plex [K1; K16]; 1xTMT6plex [N-Term]; 1xIA-DTB [C10]	Q14684	RRP1B_C583	2781.63	91.9	94.9	107.5	114.2	96.6	94.9
[R].VMSNLVEHNGVLESEAGQPQALGSSGTCSSLKK.[Q]	2xTMT6plex [K32; K33]; 1xTMT6plex [N-Term]; 1xIA-DTB [C28]	Q14684	RRP1B_C628	4554.43	107.1	88.7	99.4	95.9	102.4	106.6
[K].QYQAGQTVTCFLK.[K]	1xTMT6plex [K13]; 1xTMT6plex [N-Term]; 1xIA-DTB [C10]	Q14690	RRP5_C1154	2454.36	87.3	98.6	105.7	107.5	100.8	100
[R].LSCQNLGAVLDDVPVQGFFKK.[A]	2xTMT6plex [K20; K21]; 1xTMT6plex [N-Term]; 1xIA-DTB [C3]	Q14690	RRP5_C361	3474.98	61.3	115.8	137.6	95.4	79.3	110.7
[K].LPVITCYADAKPGLQTHGFIIR.[V]	1xTMT6plex [K11]; 1xTMT6plex [N-Term]; 1xIA-DTB [C6]	Q14690	RRP5_C535	3380.93	99.8	93	98.8	97	106.6	104.8
[K].AGLSPANCQSDR.[V]	1xTMT6plex [N-Term]; 1xIA-DTB [C8]	Q14692	BMS1_C556	1957.01	112.9	91.7	90.9	106.7	111.1	86.7
[K].AGLSPANCQSDRVNLEK.[S]	1xTMT6plex [K17]; 1xTMT6plex [N-Term]; 1xIA-DTB [C8]	Q14692	BMS1_C556	2769.51	89.3	100.7	113	99.2	86.7	111.1
[K].EASYGSIDCQYPGSALALDGSSNVEAEVLENDGVSGGLGQR.[E]	1xTMT6plex [N-Term]; 1xIA-DTB [C9]	Q14694	UBP10_C115	4853.34	105.4	112.8	121.7	97.9	79	83.2
[R].SSVELPPYSGTVLCGTQAVDKLPDGQEYQR.[I]	1xTMT6plex [K21]; 1xTMT6plex [N-Term]; 1xIA-DTB [C14]	Q14694	UBP10_C40	4205.2	84	92.1	114.8	93.6	92.1	123.5
[K].GNWCYINATLQALVACPPMYHLMK.[F]	1xCarbamidomethyl [C16]; 1xTMT6plex [K24]; 1xTMT6plex [N-Term]; 1xIA-DTB [C4]	Q14694	UBP10_C424	3761.96	141.6	88.1	96.9	86.2	86.2	100.9
[R].TPSYSISSTLNPQAPEFILGCTASK.[I]	1xTMT6plex [K25]; 1xTMT6plex [N-Term]; 1xIA-DTB [C21]	Q14694	UBP10_C94	3579.91	106.4	101.8	103.7	93.9	91.6	102.5
[K].IIQDLSDSCFGFLK.[S]	1xTMT6plex [K14]; 1xTMT6plex [N-Term]; 1xIA-DTB [C9]	Q14746	COG2_C579	2553.42	92.8	97	80.2	88.9	120.3	120.8
[R].VPAGCPGPQPAPTQELSLQVLDLQSVK.[N]	1xTMT6plex [K27]; 1xTMT6plex [N-Term]; 1xIA-DTB [C5]	Q14781	CBX2_C340	3740.08	110.7	100.4	99.2	99.9	104.6	85.2
[K].QLQVELCEMK.[Q]	1xTMT6plex [K10]; 1xTMT6plex [N-Term]; 1xIA-DTB [C7]	Q14789	GOGB1_C1462	2188.22	106.4	106.1	92.8	97.1	106.5	91.1
[R].KSDPEELREPQQSFSEAQQQLCNTR.[Q]	1xTMT6plex [K1]; 1xTMT6plex [N-Term]; 1xIA-DTB [C22]	Q14789	GOGB1_C3144	3916	90.2	112.1	103.6	104.8	101.6	87.8
[R].TPIIGSCGTQEQALLIDLTSNSCR.[R]	1xCarbamidomethyl [C7]; 1xTMT6plex [N-Term]; 1xIA-DTB [C23]	Q14789	GOGB1_C3213	3315.72	85.3	105	117.6	97.9	97.7	96.6
[K].VFFIQACQGDNYQK.[G]	1xTMT6plex [K14]; 1xTMT6plex [N-Term]; 1xIA-DTB [C7]	Q14790	CASP8_C360	2628.4	264.2	307.6	5.4	6.2	6.4	10.2
[R].FNAPGAQQFCFLLSTR.[A]	1xTMT6plex [N-Term]; 1xIA-DTB [C10]	Q14839	CHD4_C1121	2538.35	102.3	93.2	99	109.3	105.8	90.3
[R].SPACDPTVGVDFFSR.[L]	1xTMT6plex [N-Term]; 1xIA-DTB [C4]	Q14964	RB39A_C41	2336.19	84.6	98.6	113.1	97.4	114.7	91.5
[R].FVHLDNLPEDGLQCVLCVGLQFGK.[V]	1xCarbamidomethyl [C17]; 1xTMT6plex [K24]; 1xTMT6plex [N-Term]; 1xIA-DTB [C14]	Q14966	ZN638_C1023	3668.97	79.2	97.3	137.6	96.3	77.9	111.7
[K].AGFFCPICSLFYSGEK.[A]	1xCarbamidomethyl [C8]; 1xTMT6plex [K16]; 1xTMT6plex [N-Term]; 1xIA-DTB [C5]	Q14966	ZN638_C1930	2793.45	110	81.1	90.6	124.6	106.4	87.3
[K].SKNLEDDTLSECK.[Q]	2xTMT6plex [K2; K13]; 1xTMT6plex [N-Term]; 1xIA-DTB [C12]	Q14966	ZN638_C652	2678.46	87.4	107.5	100.4	108.7	92.9	103.1
[R].HFIMQVVCEATQCPDTR.[V]	1xCarbamidomethyl [C8]; 1xTMT6plex [N-Term]; 1xIA-DTB [C13]	Q14974	IMB1_C228	2773.38	96.8	98.6	103.7	103.4	97.7	99.7
[K].GALQYLVPILTQTLTKQDENDDDDDWNPCK.[A]	2xTMT6plex [K16; K30]; 1xTMT6plex [N-Term]; 1xIA-DTB [C29]	Q14974	IMB1_C345	4645.41	116.7	88.2	101.1	101.6	100.7	91.7
[R].ESCLEAYTGIVQGLK.[G]	1xTMT6plex [K15]; 1xTMT6plex [N-Term]; 1xIA-DTB [C3]	Q14974	IMB1_C765	2578.43	116.2	80.7	81.4	115.1	121.6	85
[K].APVPSTCSSTFPEELSPPSHQAK.[R]	1xTMT6plex [K23]; 1xTMT6plex [N-Term]; 1xIA-DTB [C7]	Q14980	NUMA1_C160	3364.76	132.9	89.8	99.1	84.6	81.3	112.3
[R].LDFVCSFLQK.[N]	1xTMT6plex [K10]; 1xTMT6plex [N-Term]; 1xIA-DTB [C5]	Q14980	NUMA1_C65	2167.23	92.9	99.2	100.3	113.4	104.7	89.5
[R].KHPSSPECLVSAQK.[V]	2xTMT6plex [K1; K14]; 1xTMT6plex [N-Term]; 1xIA-DTB [C8]	Q14980	NUMA1_C80	2707.55	130.9	90.9	88.5	93.8	97	98.9
[K].AQQTFFAALGAYNFCCR.[D]	1xCarbamidomethyl [C15]; 1xTMT6plex [N-Term]; 1xIA-DTB [C16]	Q14997	PSME4_C1001	2706.35	102.6	97.6	105	96.8	98.7	99.3
[R].GVPYASCTATQSFSTFR.[-]	1xTMT6plex [N-Term]; 1xIA-DTB [C7]	Q14999	CUL7_C1688	2561.3	84.6	88.8	117.3	86.5	110.7	112.1
[K].SCVAAFLDVVIGGR.[A]	1xTMT6plex [N-Term]; 1xIA-DTB [C2]	Q14C86	GAPD1_C374	2145.21	84	114.3	108.6	91	103.2	98.9
[R].FSLCSDNLEGISEGPSNR.[S]	1xTMT6plex [N-Term]; 1xIA-DTB [C4]	Q14C86	GAPD1_C568	2663.33	80.8	94.9	118.9	94.9	102.1	108.3
[R].LIITSAEASPAECCQHAK.[I]	1xCarbamidomethyl [C13]; 1xTMT6plex [K18]; 1xTMT6plex [N-Term]; 1xIA-DTB [C14]	Q14C86	GAPD1_C71	2896.54	96.9	86.7	109	99.5	94.1	113.9
[R].SQGCNDEYKLGDPEELMFQYFK.[K]	2xTMT6plex [K9; K22]; 1xTMT6plex [N-Term]; 1xIA-DTB [C4]	Q14CX7	NAA25_C339	3837.94	71.8	101.8	117.9	101.8	94.8	112
[R].VCQQPGLSLWVPFQNAATAVTNLYK.[E]	1xTMT6plex [K25]; 1xTMT6plex [N-Term]; 1xIA-DTB [C2]	Q14CZ0	HAPR1_C79	3716.04	123.3	109.1	59.4	58.2	130.3	119.7
[R].ELILSKPILNAVAETFVCQTEK.[F]	2xTMT6plex [K6; K22]; 1xTMT6plex [N-Term]; 1xIA-DTB [C18]	Q14CZ7	FAKD3_C398	3643.11	76.5	78.4	123.2	95.3	114.2	112.4
[R].KCEIDPMFQK.[T]	2xTMT6plex [K1; K10]; 1xTMT6plex [N-Term]; 1xIA-DTB [C2]	Q15003	CND2_C239	2435.38	88.7	99.7	107	97.9	101	105.7
[R].SWKEPCQVQSCQEEMISLGDGDIR.[T]	1xCarbamidomethyl [C11]; 1xTMT6plex [K3]; 1xTMT6plex [N-Term]; 1xIA-DTB [C6]	Q15003	CND2_C397	3762.87	83.9	97.2	130.5	91.8	80.4	116.1
[K].ACPLQPDHTNDEKE.[-]	1xTMT6plex [K13]; 1xTMT6plex [N-Term]; 1xIA-DTB [C2]	Q15004	PAF15_C99	2564.32	124.8	113.4	56.6	68.3	123.2	113.7
[R].SGGSGGCSGAGGASNCGTGSGR.[S]	1xCarbamidomethyl [C16]; 1xTMT6plex [N-Term]; 1xIA-DTB [C7]	Q15005	SPCS2_C17	2539.16	81.7	124.7	94.4	101.5	96.5	101.2
[R].LTVVDTPGYGDAINCR.[D]	1xTMT6plex [N-Term]; 1xIA-DTB [C15]	Q15019	SEPT2_C111	2432.28	100	93.3	103.7	95.8	97	110.2
[K].AVKDYICPNIWLEYGQYSVGGIGQK.[G]	2xTMT6plex [K3; K25]; 1xTMT6plex [N-Term]; 1xIA-DTB [C7]	Q15020	SART3_C182	3998.18	104.6	81.3	110.5	104.1	97.6	101.8
[K].DYICPNIWLEYGQYSVGGIGQK.[G]	1xTMT6plex [K22]; 1xTMT6plex [N-Term]; 1xIA-DTB [C4]	Q15020	SART3_C182	3470.82	124.4	95.4	90.8	108.4	106.4	74.5
[R].ALVENCLVPDLWIR.[Y]	1xTMT6plex [N-Term]; 1xIA-DTB [C6]	Q15020	SART3_C341	2379.34	100.8	88.7	114.5	105.9	94.2	96
[K].NAIQLLASFLANNPFSCK.[L]	1xTMT6plex [K18]; 1xTMT6plex [N-Term]; 1xIA-DTB [C17]	Q15021	CND1_C439	2918.63	74.9	106.2	110.9	110.9	105.4	91.6
[R].ESTGNMVTGQTVCK.[N]	1xTMT6plex [K14]; 1xTMT6plex [N-Term]; 1xIA-DTB [C13]	Q15021	CND1_C596	2422.28	92.4	98.9	97	107.9	107.3	96.6
[R].ESTGNMVTGQTVCK.[N]	1xOxidation [M6]; 1xTMT6plex [K14]; 1xTMT6plex [N-Term]; 1xIA-DTB [C13]	Q15021	CND1_C596	2438.28	96.3	104.3	84.7	116	107.6	91
[R].LQLLDGEYEVAMQEMEECPISK.[K]	1xTMT6plex [K22]; 1xTMT6plex [N-Term]; 1xIA-DTB [C18]	Q15022	SUZ12_C325	3522.79	123	100	108.1	88.9	100.5	79.4
[K].SGGGSCGGGGSYSASSSSSAAAAAGAAVLPVK.[K]	1xTMT6plex [K32]; 1xTMT6plex [N-Term]; 1xIA-DTB [C6]	Q15022	SUZ12_C46	3596.84	92.9	102	83	111.1	111.1	99.9
[K].LEKPNEGYLEFFVDCSASATPEFEGR.[G]	1xTMT6plex [K3]; 1xTMT6plex [N-Term]; 1xIA-DTB [C15]	Q15024	EXOS7_C85	3902.97	98	94.4	108.2	105	100	94.4
[R].LGLCFSWDREITTCLPDYYK.[W]	1xCarbamidomethyl [C14]; 1xTMT6plex [K20]; 1xTMT6plex [N-Term]; 1xIA-DTB [C4]	Q15031	SYLM_C167	3447.78	82.4	106.7	114.4	111.7	87.9	96.9
[K].IGCPLTPLPPVSIAIR.[F]	1xTMT6plex [N-Term]; 1xIA-DTB [C3]	Q15042	RB3GP_C218	2385.43	74	102.9	87.4	107.7	128.2	99.9
[R].KAENPQCLLGDFVTEFFK.[I]	2xTMT6plex [K1; K18]; 1xTMT6plex [N-Term]; 1xIA-DTB [C7]	Q15042	RB3GP_C322	3282.82	95.1	75.7	96.3	77.6	136.7	118.5
[R].FVSCLLEQPEVLVTGAGR.[G]	1xTMT6plex [N-Term]; 1xIA-DTB [C4]	Q15042	RB3GP_C873	2656.47	82.2	95.3	111.5	100	104.3	106.7
[K].FSAIQCAAAVPR.[A]	1xTMT6plex [N-Term]; 1xIA-DTB [C6]	Q15054	DPOD3_C137	1972.1	75.4	105.3	104.8	102	103	109.5
[R].DGQVHLFEHILNGYCK.[K]	1xTMT6plex [K16]; 1xTMT6plex [N-Term]; 1xIA-DTB [C15]	Q15061	WDR43_C307	2840.53	87.5	106.2	102.1	95.2	98.8	110.2
[K].KPLTSNCTIQIATPGK.[G]	2xTMT6plex [K1; K16]; 1xTMT6plex [N-Term]; 1xIA-DTB [C7]	Q15061	WDR43_C315	2868.69	98.5	94.6	98.5	101.5	103.8	103.2
[K].CYGLHAFIVPIR.[E]	1xTMT6plex [N-Term]; 1xIA-DTB [C1]	Q15067	ACOX1_C199	2127.21	115.4	92.7	92.9	106.5	99.8	92.8
[K].LVCGMVSYLNDLPSQR.[I]	1xTMT6plex [N-Term]; 1xIA-DTB [C3]	Q15067	ACOX1_C449	2533.35	89	93.4	98.7	112.2	106.3	100.4
[R].CLIFPLIVTGQR.[E]	1xTMT6plex [N-Term]; 1xIA-DTB [C1]	Q15070	OXA1L_C153	2098.24	101.1	110.9	91.5	106.2	100	90.3
[R].EVIQSDSLWLVEFYAPWCGHCQR.[L]	1xCarbamidomethyl [C21]; 1xTMT6plex [N-Term]; 1xIA-DTB [C18]	Q15084	PDIA6_C55	3561.76	111.5	89	119.3	96.5	81.9	101.7
[K].IQALQTACPDLQLSAASVGNCPTKK.[Y]	1xCarbamidomethyl [C21]; 2xTMT6plex [K24; K25]; 1xTMT6plex [N-Term]; 1xIA-DTB [C8]	Q15154	PCM1_C770	3811.12	76.4	109.3	101.8	93.7	90	128.8
[K].NNCPFSADENYRPLAK.[T]	1xTMT6plex [K16]; 1xTMT6plex [N-Term]; 1xIA-DTB [C3]	Q15154	PCM1_C957	2806.47	98.3	128.9	92.3	84.5	90	106.1
[K].GISCMNTTLSESPFK.[C]	1xTMT6plex [K15]; 1xTMT6plex [N-Term]; 1xIA-DTB [C4]	Q15181	IPYR_C242	2582.37	120.7	87.7	88.1	110	109.5	84
[R].AIVDALPPPCESACTVPTDVDKWFHHQKN.[-]	1xCarbamidomethyl [C14]; 2xTMT6plex [K22; K28]; 1xTMT6plex [N-Term]; 1xIA-DTB [C10]	Q15181	IPYR_C270	4472.35	82.5	103	121.2	84.6	85	123.7
[K].LTFSCLGGSDNFK.[H]	1xTMT6plex [K13]; 1xTMT6plex [N-Term]; 1xIA-DTB [C5]	Q15185	TEBP_C40	2356.27	100.6	83	85.9	119.5	117.6	93.4
[K].HLNEIDLFHCIDPNDSK.[H]	1xTMT6plex [K17]; 1xTMT6plex [N-Term]; 1xIA-DTB [C10]	Q15185	TEBP_C58	2977.56	72.1	145.1	129.2	74.3	97.1	82.2
[R].CSEGSFLLTTFPRPVTVEPMDQLDDEEGLPEK.[L]	1xTMT6plex [K32]; 1xTMT6plex [N-Term]; 1xIA-DTB [C1]	Q15233	NONO_C208	4547.31	77.4	106.3	104.8	100.9	103.4	107.1
[R].CSEGSFLLTTFPRPVTVEPMDQLDDEEGLPEK.[L]	1xOxidation [M20]; 1xTMT6plex [K32]; 1xTMT6plex [N-Term]; 1xIA-DTB [C1]	Q15233	NONO_C208	4563.3	69.1	103.2	106.9	110.8	97.3	112.7
[R].LLDVLSGHEGPISGLCFNPMK.[S]	1xTMT6plex [K21]; 1xTMT6plex [N-Term]; 1xIA-DTB [C16]	Q15269	PWP2_C508	3194.75	132.1	70.6	101.6	102.3	90.4	103.1
[K].RFEISCNLSLDAMEEFLNR.[R]	1xTMT6plex [N-Term]; 1xIA-DTB [C6]	Q15269	PWP2_C647	3025.54	99.2	101.5	103.6	106.7	94.9	94.1
[R].LAIIVDEGGDALLVSLVCR.[S]	1xTMT6plex [N-Term]; 1xIA-DTB [C18]	Q15269	PWP2_C86	2694.54	89.8	116.1	125.2	114.9	62.5	91.5
[R].GAQPAPLLCSVLK.[A]	1xTMT6plex [K13]; 1xTMT6plex [N-Term]; 1xIA-DTB [C9]	Q15345	LRC41_C607	2264.36	122.8	107.6	82.8	83.1	106.7	96.9
[R].AITIAGVPQSVTECVK.[Q]	1xTMT6plex [K16]; 1xTMT6plex [N-Term]; 1xIA-DTB [C14]	Q15365	PCBP1_C158	2583.49	100.3	77.1	88.8	94.9	120	118.9
[K].QICLVMLETLSQSPQGR.[V]	1xTMT6plex [N-Term]; 1xIA-DTB [C3]	Q15365	PCBP1_C163	2641.44	85.6	80	100	110.1	119	105.3
[R].VMTIPYQPMPASSPVICAGGQDR.[C]	2xOxidation [M2; M9]; 1xTMT6plex [N-Term]; 1xIA-DTB [C17]	Q15365	PCBP1_C194	3188.61	114.5	130.9	108.3	71.2	81.6	93.5
[R].CSDAAGYPHATHDLEGPPLDAYSIQGQHTISPLDLAK.[L]	1xTMT6plex [K37]; 1xTMT6plex [N-Term]; 1xIA-DTB [C1]	Q15365	PCBP1_C201	4856.47	150.2	100.9	94.6	78.3	82.3	93.6
[K].GYWASLDASTQTTHELTIPNNLIGCIIGR.[Q]	1xTMT6plex [N-Term]; 1xIA-DTB [C25]	Q15365	PCBP1_C293	3883.04	159.2	84.6	81.9	94.6	88.4	91.4
[R].LVVPASQCGSLIGK.[G]	1xTMT6plex [K14]; 1xTMT6plex [N-Term]; 1xIA-DTB [C8]	Q15366	PCBP2_C109	2339.39	99.2	89.6	92.7	91.2	114	113.3
[R].AITIAGIPQSIIECVK.[Q]	1xTMT6plex [K16]; 1xTMT6plex [N-Term]; 1xIA-DTB [C14]	Q15366	PCBP2_C158	2623.56	121.5	77	86.6	93.6	113.2	108.1
[K].GYWGLDASAQTTSHELTIPNDLIGCIIGR.[Q]	1xTMT6plex [N-Term]; 1xIA-DTB [C25]	Q15366	PCBP2_C301	3840	136.3	82.2	90	93.6	90.2	107.7
[K].TPLGTCSRPISPLLDQNTPDFTTFCSVGEWLQAIK.[M]	1xCarbamidomethyl [C25]; 1xTMT6plex [K35]; 1xTMT6plex [N-Term]; 1xIA-DTB [C6]	Q15375	EPHA7_C907	4860.55	105	105.8	86.9	88	100.7	113.5
[R].LPTASTCMNLLK.[L]	1xTMT6plex [K12]; 1xTMT6plex [N-Term]; 1xIA-DTB [C7]	Q15386	UBE3C_C1051	2259.3	96.2	96.4	108.7	89.9	93.2	115.5
[K].IGTNLSLIQCPR.[V]	1xTMT6plex [N-Term]; 1xIA-DTB [C10]	Q15390	MTFR1_C49	2053.18	93	100.6	107.5	95.6	88.7	114.7
[R].YRPDMPCFLLSNQNAVK.[A]	1xTMT6plex [K17]; 1xTMT6plex [N-Term]; 1xIA-DTB [C7]	Q15398	DLGP5_C129	2963.6	104.4	121.9	90.5	76.5	92.9	113.8
[R].YRPDMPCFLLSNQNAVK.[A]	1xOxidation [M5]; 1xTMT6plex [K17]; 1xTMT6plex [N-Term]; 1xIA-DTB [C7]	Q15398	DLGP5_C129	2979.59	107.4	113.2	96.4	78.5	92.4	112.1
[R].IRQEECAETAVSVIPK.[E]	1xTMT6plex [K16]; 1xTMT6plex [N-Term]; 1xIA-DTB [C6]	Q15398	DLGP5_C592	2740.54	103.3	108.4	105.9	85.8	99.3	97.3
[K].CASQAGMTAYGTR.[R]	1xOxidation [M7]; 1xTMT6plex [N-Term]; 1xIA-DTB [C1]	Q15417	CNN3_C173	2071.03	79.8	114.5	94.5	102.2	92.1	116.9
[K].DGIILCELINK.[L]	1xTMT6plex [K11]; 1xTMT6plex [N-Term]; 1xIA-DTB [C6]	Q15417	CNN3_C59	2198.3	90.4	91.4	95.3	118.3	114.9	89.8
[R].CYGFVTMSTAEEATK.[C]	1xTMT6plex [K15]; 1xTMT6plex [N-Term]; 1xIA-DTB [C1]	Q15424	SAFB1_C448	2605.34	75.2	101.9	93.2	122.1	105.8	101.8
[R].MVVPLACLLTPLK.[E]	1xTMT6plex [K13]; 1xTMT6plex [N-Term]; 1xIA-DTB [C7]	Q15437	SC23B_C40	2365.45	99.9	86.6	86.7	92.6	107.2	127
[R].GDTVSASPCSAPLAR.[A]	1xTMT6plex [N-Term]; 1xIA-DTB [C9]	Q15477	SKI2_C247	2170.15	111.7	93.8	108.1	103.8	89.6	93
[K].LVDLPCVMESLK.[T]	1xTMT6plex [K12]; 1xTMT6plex [N-Term]; 1xIA-DTB [C6]	Q15545	TAF7_C72	2314.33	120.4	124.6	79.1	65	94.5	116.2
[K].ETAAACVEK.[-]	1xTMT6plex [K9]; 1xTMT6plex [N-Term]; 1xIA-DTB [C6]	Q15631	TSN_C225	1889.06	102.5	89.9	107.3	102.5	97.6	100.2
[R].GFNKETAAACVEK.[-]	2xTMT6plex [K4; K13]; 1xTMT6plex [N-Term]; 1xIA-DTB [C10]	Q15631	TSN_C225	2564.45	99.1	94.6	112.2	99.2	92.5	102.4
[R].SCSLGSLGALGPACCR.[V]	2xCarbamidomethyl [C14; C15]; 1xTMT6plex [N-Term]; 1xIA-DTB [C2]	Q15633	TRBP2_C282	2347.19	87.6	104.6	120.9	97.8	81	108.1
[R].SITNTTVCTK.[C]	1xTMT6plex [K10]; 1xTMT6plex [N-Term]; 1xIA-DTB [C8]	Q15637	SF01_C279	2035.16	70.2	108.8	93.6	117.8	92.4	117.1
[K].LDIISPQLSSASLLTPQSAECLR.[A]	1xTMT6plex [N-Term]; 1xIA-DTB [C21]	Q15643	TRIPB_C1329	3180.75	103	109.5	93.4	98.6	96.6	98.9
[K].QALPCVAESPTVHVEVHQR.[G]	1xTMT6plex [N-Term]; 1xIA-DTB [C5]	Q15645	PCH2_C14	2838.52	106.8	90.2	107.4	94	92	109.6
[K].IYLSCLEELMK.[C]	1xTMT6plex [K11]; 1xTMT6plex [N-Term]; 1xIA-DTB [C5]	Q15645	PCH2_C334	2309.3	94.8	98.3	81.7	103.9	121.8	99.5
[K].WTPSFSSITSANSVDLPACFFLK.[F]	1xTMT6plex [K23]; 1xTMT6plex [N-Term]; 1xIA-DTB [C19]	Q15648	MED1_C302	3485.85	107.9	99.5	109.6	91.4	94.3	97.3
[K].GLSDALICTDDFIAK.[V]	1xTMT6plex [K15]; 1xTMT6plex [N-Term]; 1xIA-DTB [C8]	Q15648	MED1_C489	2549.4	118.3	83.2	115	94	92	97.5
[R].RAYCEGCYVATLEK.[C]	1xCarbamidomethyl [C7]; 1xTMT6plex [K14]; 1xTMT6plex [N-Term]; 1xIA-DTB [C4]	Q15654	TRIP6_C328	2630.38	95.7	96.7	113.3	86	85.2	123.1
[K].IITIPATQLAQCQLQTK.[S]	1xTMT6plex [K17]; 1xTMT6plex [N-Term]; 1xIA-DTB [C12]	Q15723	ELF2_C470	2837.67	100.3	114.9	96.7	94.1	91.6	102.5
[R].DWLCNSSYSFESDFDLTK.[S]	1xTMT6plex [K18]; 1xTMT6plex [N-Term]; 1xIA-DTB [C4]	Q15751	HERC1_C1570	3124.53	100.5	114.6	107	101.1	69.2	107.7
[R].ALSLLSVSGSSCSLAAGLESLGLTDIR.[T]	1xTMT6plex [N-Term]; 1xIA-DTB [C12]	Q15751	HERC1_C3204	3358.85	116.6	87.9	88.1	106.6	102.3	98.5
[K].EVVPLPQQVLCLK.[G]	1xTMT6plex [K13]; 1xTMT6plex [N-Term]; 1xIA-DTB [C11]	Q15751	HERC1_C56	2433.47	114.9	112.4	110.3	90.3	78.3	93.7
[K].SAGGSGGAGGGEQNGQEEKWCEK.[A]	2xTMT6plex [K19; K23]; 1xTMT6plex [N-Term]; 1xIA-DTB [C21]	Q15796	SMAD2_C41	3419.72	72	115	116.7	94.9	82	119.4
[K].CVTIPSTCSEIWGLSTPNTIDQWDTTGLYSFSEQTR.[S]	1xCarbamidomethyl [C1]; 1xTMT6plex [N-Term]; 1xIA-DTB [C8]	Q15796	SMAD2_C81	4832.34	65.8	117.6	129.9	99.4	70.2	117
[R].LEQLILSDTGISSLHFPDAGIGCK.[T]	1xTMT6plex [K24]; 1xTMT6plex [N-Term]; 1xIA-DTB [C23]	Q15813	TBCE_C301	3481.91	131.7	71.4	106.5	89.9	93.6	106.8
[K].KAEGDLGPSWVCGFSNLESQVLEKR.[A]	2xTMT6plex [K1; K24]; 1xTMT6plex [N-Term]; 1xIA-DTB [C12]	Q15814	TBCC_C184	3946.15	75.6	96.5	123.8	95.6	86.9	121.7
[K].KAEGDLGPSWVCGFSNLESQVLEK.[R]	2xTMT6plex [K1; K24]; 1xTMT6plex [N-Term]; 1xIA-DTB [C12]	Q15814	TBCC_C184	3790.05	99.4	84.4	118.6	95.5	95.3	106.8
[K].ADTLTPEECQQFKK.[Q]	2xTMT6plex [K13; K14]; 1xTMT6plex [N-Term]; 1xIA-DTB [C9]	Q16181	SEPT7_C204	2834.57	100.4	90	91.1	113.5	110.5	94.5
[R].QYPWGVAEVENGEHCDFTILR.[N]	1xTMT6plex [N-Term]; 1xIA-DTB [C15]	Q16181	SEPT7_C280	3201.6	94.5	100.3	116.1	95.7	89.2	104.2
[R].GIWSIHVYCVDNILVK.[V]	1xTMT6plex [K16]; 1xTMT6plex [N-Term]; 1xIA-DTB [C9]	Q16222	UAP1_C251	2826.61	193.4	70.7	77.4	85.2	93.5	79.8
[R].SNVASSAACSSASSLGLGLAYR.[R]	1xTMT6plex [N-Term]; 1xIA-DTB [C9]	Q16352	AINX_C54	2810.47	108.8	99.5	87.6	104.1	96.9	103.2
[R].FQLTDCQIYEVLSVIR.[D]	1xTMT6plex [N-Term]; 1xIA-DTB [C6]	Q16555	DPYL2_C179	2665.46	79.3	76.7	96.4	91.1	119.9	136.6
[R].ELHGQNPVVTPCNK.[Q]	1xTMT6plex [K14]; 1xTMT6plex [N-Term]; 1xIA-DTB [C12]	Q16630	CPSF6_C159	2503.39	112.3	78.6	97.5	108.4	106.2	97
[K].EGTQASEGYFSQSQEEEFAQSEELCAK.[A]	1xTMT6plex [K27]; 1xTMT6plex [N-Term]; 1xIA-DTB [C25]	Q16643	DREB_C613	3979.89	99.7	90.1	95.7	113.1	106	95.5
[R].KCACASHVAK.[V]	1xCarbamidomethyl [C4]; 2xTMT6plex [K1; K10]; 1xTMT6plex [N-Term]; 1xIA-DTB [C2]	Q16643	DREB_C96	2271.3	88	109.2	105.8	88.2	103.1	105.8
[K].ETTQNALQTPCYTPYYVAPEVLGPEK.[Y]	1xTMT6plex [K26]; 1xTMT6plex [N-Term]; 1xIA-DTB [C11]	Q16644	MAPK3_C203	3880.02	92.5	93.4	108.8	104.7	90.3	110.3
[K].QAGSSSASQGCNNQ.[-]	1xTMT6plex [N-Term]; 1xIA-DTB [C11]	Q16644	MAPK3_C379	2076.99	92.3	104.6	87.9	105	107.3	102.9
[K].IFHPNVGANGEICVNVLK.[R]	1xTMT6plex [K18]; 1xTMT6plex [N-Term]; 1xIA-DTB [C13]	Q16763	UBE2S_C95	2891.63	94.1	94.9	90.4	90.2	111.4	119
[K].AFFIESVCDDPTVVASNIMEVK.[I]	1xTMT6plex [K22]; 1xTMT6plex [N-Term]; 1xIA-DTB [C8]	Q16875	F263_C155	3381.78	135	89.6	89.3	97	106	83.2
[R].WGLGGTCVNVGCIPK.[K]	1xCarbamidomethyl [C12]; 1xTMT6plex [K15]; 1xTMT6plex [N-Term]; 1xIA-DTB [C7]	Q16881	TRXR1_C209	2528.39	82.8	103.4	115.4	97.2	94.9	106.3
[R].YLGIPGDKEYCISSDDLFSLPYCPGK.[T]	1xCarbamidomethyl [C11]; 2xTMT6plex [K8; K26]; 1xTMT6plex [N-Term]; 1xIA-DTB [C23]	Q16881	TRXR1_C339	4134.15	98.5	90.9	97.9	110.2	98.6	103.9
[K].KGAQDPTAFSVQDPWFCEAR.[E]	1xTMT6plex [K1]; 1xTMT6plex [N-Term]; 1xIA-DTB [C17]	Q1ED39	KNOP1_C172	3220.66	95.5	112.7	104.5	98.4	93.2	95.7
[K].GAQDPTAFSVQDPWFCEAR.[E]	1xTMT6plex [N-Term]; 1xIA-DTB [C16]	Q1ED39	KNOP1_C172	2863.4	118.9	101	105.3	98.8	86.7	89.3
[K].VTQNLPMKEGCTEVSLLR.[V]	1xTMT6plex [K8]; 1xTMT6plex [N-Term]; 1xIA-DTB [C11]	Q1KMD3	HNRL2_C308	2985.66	75	105.2	130.1	82.4	79.1	128.3
[R].DLLVQQASQCLSK.[L]	1xTMT6plex [K13]; 1xTMT6plex [N-Term]; 1xIA-DTB [C10]	Q1KMD3	HNRL2_C518	2400.37	94.4	97.5	113.6	106.2	95	93.2
[R].LQEALDAEMLEDEAGGGGAGPGGACK.[A]	1xTMT6plex [K26]; 1xTMT6plex [N-Term]; 1xIA-DTB [C25]	Q1KMD3	HNRL2_C57	3413.71	102.4	81.6	77.8	117.8	139.5	80.9
[K].CDYMDEVTYGELEKEEAQPIVTK.[Y]	2xTMT6plex [K14; K23]; 1xTMT6plex [N-Term]; 1xIA-DTB [C1]	Q1KMD3	HNRL2_C602	3887.01	82.1	108.3	97.3	106	94.8	111.5
[R].DVPIFVCAMAFPTVPCPLHVFEPR.[Y]	1xCarbamidomethyl [C16]; 1xTMT6plex [N-Term]; 1xIA-DTB [C7]	Q1L5Z9	LONF2_C543	3480.82	110.1	125.8	106.3	77.2	79	101.6
[K].SALCNADSPKDPVLPMK.[F]	2xTMT6plex [K10; K17]; 1xTMT6plex [N-Term]; 1xIA-DTB [C4]	Q29RF7	PDS5A_C1093	2982.67	78.9	105.2	102.5	105.5	95.1	112.7
[R].ELLDLHKQPTSEANCSAMFGK.[L]	2xTMT6plex [K7; K21]; 1xTMT6plex [N-Term]; 1xIA-DTB [C15]	Q29RF7	PDS5A_C532	3515.9	102.4	106.3	118	79.3	74	120
[R].KGPELCLEELDAAIPGSR.[A]	1xTMT6plex [K1]; 1xTMT6plex [N-Term]; 1xIA-DTB [C6]	Q2M1P5	KIF7_C667	2865.59	88	103.6	112.4	102.3	97	96.7
[R].GTGQPGSRPTWPSQCLEELVQELAR.[L]	1xTMT6plex [N-Term]; 1xIA-DTB [C15]	Q2M3G4	SHRM1_C541	3477.81	99.4	66.8	109	101.4	90.8	132.6
[R].DTGTVHLNELGNTQNFMLLCPR.[L]	1xTMT6plex [N-Term]; 1xIA-DTB [C20]	Q2NL82	TSR1_C126	3211.66	122.8	95.1	85.2	109.3	110.6	77
[R].ISLPEAMQLLQDRDTGTVHLNELGNTQNFMLLCPR.[L]	1xOxidation [M]; 1xTMT6plex [N-Term]; 1xIA-DTB [C33]	Q2NL82	TSR1_C126	4722.44	116.2	94.8	95.5	104	98.5	90.8
[R].ISLPEAMQLLQDRDTGTVHLNELGNTQNFMLLCPR.[L]	1xTMT6plex [N-Term]; 1xIA-DTB [C33]	Q2NL82	TSR1_C126	4706.44	108.1	77.1	88.3	127.9	80.8	117.9
[R].QLFGWLFCK.[V]	1xTMT6plex [K9]; 1xTMT6plex [N-Term]; 1xIA-DTB [C8]	Q2PZI1	D19L1_C497	2109.21	102.4	101.7	88.6	108.8	117.8	80.7
[R].VILITPTPLCETAWEEQCIIQGCK.[L]	2xCarbamidomethyl [C18; C23]; 1xTMT6plex [K24]; 1xTMT6plex [N-Term]; 1xIA-DTB [C10]	Q2TAA2	IAH1_C137	3770.01	98.6	96	122.4	94.5	90.3	98.2
[R].TPTSGQSVSTCSSK.[N]	1xTMT6plex [K14]; 1xTMT6plex [N-Term]; 1xIA-DTB [C11]	Q32NC0	CR021_C175	2337.25	91.4	107.2	101.3	108.1	87.2	104.8
[K].WLLDGQPCSSEFLPIVHCYSFSK.[D]	1xCarbamidomethyl [C18]; 1xTMT6plex [K23]; 1xTMT6plex [N-Term]; 1xIA-DTB [C8]	Q32P41	TRM5_C408	3680.9	124.5	85.3	106.5	97.8	83.5	102.3
[K].LGMEVPGDIKGETCSAK.[Q]	2xTMT6plex [K10; K17]; 1xTMT6plex [N-Term]; 1xIA-DTB [C14]	Q3KNV8	PCGF3_C113	2931.63	84.9	86.2	102.1	101.8	111	114
[R].THPSAAVPVCPR.[S]	1xTMT6plex [N-Term]; 1xIA-DTB [C10]	Q3KQU3	MA7D1_C361	1973.1	117.1	104.8	74.5	100.2	108.9	94.5
[K].GAIVTISSGSCCKPTPQLAAFSASK.[A]	1xCarbamidomethyl [C12]; 2xTMT6plex [K13; K25]; 1xTMT6plex [N-Term]; 1xIA-DTB [C11]	Q3SXM5	HSDL1_C208	3678.03	86.5	99.5	112.5	108	93	100.4
[K].CQNILQGNFKPDFYLK.[Y]	2xTMT6plex [K10; K16]; 1xTMT6plex [N-Term]; 1xIA-DTB [C1]	Q49A26	GLYR1_C486	3124.76	78.9	127.1	90.1	100.7	96.8	106.4
[K].LLPFCPPVVLAQSVENVWTTCR.[A]	1xCarbamidomethyl [C5]; 1xTMT6plex [N-Term]; 1xIA-DTB [C21]	Q4ADV7	RIC1_C724	3267.76	118.9	107	110.3	85.6	84.5	93.6
[R].KLLPFCPPVVLAQSVENVWTTCR.[A]	1xCarbamidomethyl [C6]; 1xTMT6plex [K1]; 1xTMT6plex [N-Term]; 1xIA-DTB [C22]	Q4ADV7	RIC1_C724	3625.02	109.8	120.3	100.7	99.9	75.6	93.7
[R].SKDEEADNDNYEVLFNLEELKLDQPFIDCIR.[V]	2xTMT6plex [K2; K21]; 1xTMT6plex [N-Term]; 1xIA-DTB [C29]	Q4J6C6	PPCEL_C160	4911.53	66.3	98.4	112.3	102.2	113	107.9
[R].GHCHAPDEQGLEAR.[R]	1xTMT6plex [N-Term]; 1xIA-DTB [C3]	Q4VC44	FWCH1_C173	2258.13	60.3	133	91.5	100.4	131.7	83.2
[R].LSIPSLTCNPDKTDGPVFHSNTLER.[K]	1xTMT6plex [K12]; 1xTMT6plex [N-Term]; 1xIA-DTB [C8]	Q4VCS5	AMOT_C1047	3708.98	109.5	90.5	83.3	102.5	110.4	103.6
[R].APVFLQFCDSGGR.[G]	1xTMT6plex [N-Term]; 1xIA-DTB [C8]	Q4ZIN3	MBRL_C129	2135.13	132.6	100.6	80.7	102.4	106.6	77.2
[K].SLCNLEESITSAGR.[D]	1xTMT6plex [N-Term]; 1xIA-DTB [C3]	Q52LJ0	FA98B_C63	2218.17	107.1	79.9	108	107.2	100.6	97.1
[R].AVGDGILCNTYIDSYKGTVDCVQAR.[A]	1xCarbamidomethyl [C21]; 1xTMT6plex [K16]; 1xTMT6plex [N-Term]; 1xIA-DTB [C8]	Q53EL6	PDCD4_C275	3685.91	97.7	80.3	109.5	73.1	92.4	147.1
[R].AVGDGILCNTYIDSYK.[G]	1xTMT6plex [K16]; 1xTMT6plex [N-Term]; 1xIA-DTB [C8]	Q53EL6	PDCD4_C275	2699.45	125.1	92.2	93.4	83.5	94.7	111.1
[K].SLQQPGLPSQSCSVQSSGGQPPGR.[Q]	1xTMT6plex [N-Term]; 1xIA-DTB [C12]	Q53ET0	CRTC2_C515	3120.61	95.1	105.1	96.3	109.5	97	97
[K].KLPILIFPEGTCINNTSVMMFK.[K]	2xTMT6plex [K1; K22]; 1xTMT6plex [N-Term]; 1xIA-DTB [C12]	Q53EU6	GPAT3_C306	3693.09	120.6	105.7	104.5	82.7	89.4	97.1
[K].MININILSVCK.[M]	1xTMT6plex [K11]; 1xTMT6plex [N-Term]; 1xIA-DTB [C10]	Q53GQ0	DHB12_C166	2215.31	77.9	91.4	96.2	126.3	116.5	91.7
[K].KATVFLNPAACK.[G]	2xTMT6plex [K1; K12]; 1xTMT6plex [N-Term]; 1xIA-DTB [C11]	Q53H12	AGK_C72	2459.48	94.1	94.2	81.2	128.4	122.1	80.1
[R].SDVCTPGGTTIYGLHALEQGGLR.[A]	1xTMT6plex [N-Term]; 1xIA-DTB [C4]	Q53H96	P5CR3_C235	3083.61	110.2	90.1	93.5	100.4	95.3	110.5
[R].AATMSAVEAATCR.[A]	1xTMT6plex [N-Term]; 1xIA-DTB [C12]	Q53H96	P5CR3_C266	2020.05	94.8	95.1	103.1	99.7	110.1	97.1
[R].IEAVLPQCDLNNLSSFATSVLR.[W]	1xTMT6plex [N-Term]; 1xIA-DTB [C8]	Q53R41	FAKD1_C446	3128.7	96.8	112.9	113.8	91.3	85	100.1
[K].MLAEVLGGINCVK.[A]	1xTMT6plex [K13]; 1xTMT6plex [N-Term]; 1xIA-DTB [C11]	Q53R41	FAKD1_C716	2314.34	82.1	95.9	114.6	104.1	99.9	103.4
[R].LACDLLPCNSDLRDLLSS.[-]	1xCarbamidomethyl [C3]; 1xTMT6plex [N-Term]; 1xIA-DTB [C8]	Q53RE8	ANR39_C173	2743.43	93.7	76.4	137.2	88.1	105.3	99.2
[K].VTDISGGCGAMYEIK.[I]	1xTMT6plex [K15]; 1xTMT6plex [N-Term]; 1xIA-DTB [C8]	Q53S33	BOLA3_C59	2511.34	95.9	95.5	95.4	121.4	110.4	81.5
[R].NIFCTIMTSEDFLDAFEK.[L]	1xTMT6plex [K18]; 1xTMT6plex [N-Term]; 1xIA-DTB [C4]	Q5C9Z4	NOM1_C661	3091.59	65.6	93.4	108.3	116	90.8	125.8
[R].SFIAAPCQIITNTSTLLK.[N]	1xTMT6plex [K18]; 1xTMT6plex [N-Term]; 1xIA-DTB [C7]	Q5FBB7	SGO1_C44	2888.67	110.6	135.1	90.4	72.2	85.1	106.5
[R].GPCNWFLFSDVLK.[R]	1xTMT6plex [K13]; 1xTMT6plex [N-Term]; 1xIA-DTB [C3]	Q5H9F3	BCORL_C1694	2493.37	130.2	105.7	78.2	84.9	106.2	94.8
[K].LQVLVEEAFGCQLQNR.[D]	1xTMT6plex [N-Term]; 1xIA-DTB [C11]	Q5JPH6	SYEM_C386	2585.41	89.6	96.5	125.2	101.8	86.2	100.6
[R].CPFVENTWK.[I]	1xTMT6plex [K9]; 1xTMT6plex [N-Term]; 1xIA-DTB [C1]	Q5JPI3	CC038_C259	2091.15	93.9	147.4	89.8	84.1	87.1	97.7
[K].FEQSDLEAFYNVITVCGTNEVR.[H]	1xTMT6plex [N-Term]; 1xIA-DTB [C16]	Q5JPI3	CC038_C308	3272.65	83.9	104	124.8	84.2	95.2	107.8
[R].LLPDHTYSVVSGGDPLCIPELTWEQLK.[Q]	1xTMT6plex [K27]; 1xTMT6plex [N-Term]; 1xIA-DTB [C17]	Q5JRX3	PREP_C241	3978.15	126.4	65.7	135.1	96.6	66	110.1
[R].AFSSLNTLPEELRPYVPLFCSVLTK.[L]	1xTMT6plex [K25]; 1xTMT6plex [N-Term]; 1xIA-DTB [C20]	Q5JRX3	PREP_C619	3792.12	110.5	91.5	98.1	110.3	95.6	94.1
[K].SPGSSWQEYGPSDTCGSR.[R]	1xTMT6plex [N-Term]; 1xIA-DTB [C15]	Q5JSZ5	PRC2B_C1245	2639.24	100.6	118.7	91.5	88.2	100	101
[K].SSGTFLSGLSDCTNVTFSK.[V]	1xTMT6plex [K19]; 1xTMT6plex [N-Term]; 1xIA-DTB [C12]	Q5JTH9	RRP12_C102	2918.53	67.9	96.5	122.8	115.2	89.7	107.9
[K].EICAVLAAVTEVIR.[S]	1xTMT6plex [N-Term]; 1xIA-DTB [C3]	Q5JTH9	RRP12_C125	2225.29	98.4	84.4	107.9	114.3	103.7	91.4
[K].GHSSDSNPAICR.[H]	1xTMT6plex [N-Term]; 1xIA-DTB [C11]	Q5JTH9	RRP12_C31	1982.01	128	96.2	80.1	91.8	96.3	107.7
[K].KGHSSDSNPAICR.[H]	1xTMT6plex [K1]; 1xTMT6plex [N-Term]; 1xIA-DTB [C12]	Q5JTH9	RRP12_C31	2339.27	62.7	129.7	111.7	103.8	119.7	72.5
[K].DLLPCFPEGLVK.[S]	1xTMT6plex [K12]; 1xTMT6plex [N-Term]; 1xIA-DTB [C5]	Q5JTH9	RRP12_C317	2298.33	97.8	84.2	108.7	114.3	98.4	96.6
[R].LSVLDLVVALAPCADEAAISK.[L]	1xTMT6plex [K21]; 1xTMT6plex [N-Term]; 1xIA-DTB [C13]	Q5JTH9	RRP12_C763	3065.77	94.7	73.8	149.7	108.3	84.6	89
[K].EFITALIPEVILCTK.[E]	1xTMT6plex [K15]; 1xTMT6plex [N-Term]; 1xIA-DTB [C13]	Q5JTH9	RRP12_C865	2657.57	105.4	88.2	105.7	101.4	102	97.2
[R].AQVCGGFILHEAVAPECLR.[L]	1xCarbamidomethyl [C4]; 1xTMT6plex [N-Term]; 1xIA-DTB [C17]	Q5JTZ9	SYAM_C609	2808.49	108.8	101.1	124	93.8	78.4	93.9
[K].GALGSPVAAAGAAMQESFGCVVANR.[F]	1xTMT6plex [N-Term]; 1xIA-DTB [C20]	Q5JVS0	HABP4_C22	3072.59	109.3	97.4	103.3	91.7	90.4	107.9
[K].ESSPDDDVQQVVFDLICK.[V]	1xTMT6plex [K18]; 1xTMT6plex [N-Term]; 1xIA-DTB [C17]	Q5JWR5	DOP1_C1158	3004.57	89.3	93	104.9	96.7	95.1	120.9
[R].CNYLALVGGGK.[K]	1xTMT6plex [K11]; 1xTMT6plex [N-Term]; 1xIA-DTB [C1]	Q5MNZ6	WIPI3_C63	2062.19	77.5	134	119.8	103.6	88.4	76.5
[R].ESLSGDTGSLSCDNALFVIDTTPGMSADK.[N]	1xTMT6plex [K29]; 1xTMT6plex [N-Term]; 1xIA-DTB [C12]	Q5QJE6	TDIF2_C484	3898.95	98.8	111.7	79.5	99	124.5	86.5
[K].AVITPDFEKNHCVPPYSESK.[Y]	2xTMT6plex [K9; K20]; 1xTMT6plex [N-Term]; 1xIA-DTB [C12]	Q5QJE6	TDIF2_C618	3457.88	91.5	106.5	141.6	74.6	69.5	116.3
[R].ILYSFCTAFK.[R]	1xTMT6plex [K10]; 1xTMT6plex [N-Term]; 1xIA-DTB [C6]	Q5R372	RBG1L_C248	2160.23	98.1	110.3	91.9	100.6	97.3	101.7
[R].RAPPGGCEERELALALQEALEPAVR.[L]	1xTMT6plex [N-Term]; 1xIA-DTB [C7]	Q5RKV6	EXOS6_C117	3413.85	77.7	100.8	119.2	100.7	95.6	106
[R].APPGGCEERELALALQEALEPAVR.[L]	1xTMT6plex [N-Term]; 1xIA-DTB [C6]	Q5RKV6	EXOS6_C117	3257.75	100.6	86.1	117.9	102	87.9	105.6
[R].DPSQPQQWVSSQVLLCK.[R]	1xTMT6plex [K17]; 1xTMT6plex [N-Term]; 1xIA-DTB [C16]	Q5SNT2	TM201_C121	2910.59	95.8	102.8	92.3	97.7	101.4	110
[R].SGEFPVSDYFSLLSGSCPSSPLPSPAPSVAGSVASSSGSLR.[H]	1xTMT6plex [N-Term]; 1xIA-DTB [C17]	Q5SNT2	TM201_C498	4709.36	87.5	101.2	100.2	107.3	82.9	120.9
[K].GQLGSTQSQGLVPCVMFVLK.[E]	1xTMT6plex [K20]; 1xTMT6plex [N-Term]; 1xIA-DTB [C14]	Q5SRE5	NU188_C706	3059.72	118	95.5	93.9	98.4	97.7	96.5
[K].GFSGTFQLCFPYYPSPGVLFPK.[K]	1xTMT6plex [K22]; 1xTMT6plex [N-Term]; 1xIA-DTB [C9]	Q5SSJ5	HP1B3_C412	3419.83	121.1	92	89.7	105.7	101.5	90
[R].WSMQNFSPQCSIVLLEHLK.[T]	1xTMT6plex [K19]; 1xTMT6plex [N-Term]; 1xIA-DTB [C10]	Q5SY16	NOL9_C219	3227.75	89.8	96.6	106.8	109.5	94.1	103.2
[R].TVNCLLVGAIAIPHCVLK.[C]	1xCarbamidomethyl [C4]; 1xTMT6plex [K18]; 1xTMT6plex [N-Term]; 1xIA-DTB [C15]	Q5SY16	NOL9_C648	2888.7	78.4	102	119.8	96	94.8	109
[K].ILTDEMLLQACEGR.[T]	1xTMT6plex [N-Term]; 1xIA-DTB [C11]	Q5T3I0	GPTC4_C152	2330.24	84.3	100.4	120.9	97.6	95	101.8
[R].AYADPCSR.[R]	1xTMT6plex [N-Term]; 1xIA-DTB [C6]	Q5T3I0	GPTC4_C333	1620.84	125.9	98.4	78.9	99.3	110.2	87.2
[K].EQLAEHLGDCGLQEGWLLVCRPAEGGAR.[L]	1xCarbamidomethyl [C10]; 1xTMT6plex [N-Term]; 1xIA-DTB [C20]	Q5T447	HECD3_C143	3802.93	93.5	102.9	126.3	85	93.8	98.4
[R].HTACNEQQR.[T]	1xTMT6plex [N-Term]; 1xIA-DTB [C4]	Q5T4S7	UBR4_C2222	1824.93	109.8	108.8	94.4	94.5	93.6	98.8
[K].AVQCLNTSSK.[E]	1xTMT6plex [K10]; 1xTMT6plex [N-Term]; 1xIA-DTB [C4]	Q5T4S7	UBR4_C2554	2018.15	107.9	90.3	103.9	96.8	98.5	102.6
[R].WQAHCLTLHIYR.[N]	1xTMT6plex [N-Term]; 1xIA-DTB [C5]	Q5T4S7	UBR4_C3430	2279.24	103.5	108.5	88	95.4	99.6	105
[K].DVPVEALTTVKPYCNEIHAQAQLWLK.[R]	2xTMT6plex [K11; K26]; 1xTMT6plex [N-Term]; 1xIA-DTB [C14]	Q5T4S7	UBR4_C4049	4163.33	104.6	84.4	113.9	88	94.6	114.6
[R].FYCVLSPEASEDDLNRLDSVACDVLFSK.[L]	1xCarbamidomethyl [C22]; 1xTMT6plex [K28]; 1xTMT6plex [N-Term]; 1xIA-DTB [C3]	Q5T4S7	UBR4_C934	4160.11	70.4	82.7	134.3	97.9	83.6	131.1
[K].AINILLEGNSDTTSWETVGCK.[K]	1xTMT6plex [K21]; 1xTMT6plex [N-Term]; 1xIA-DTB [C20]	Q5T6F2	UBAP2_C104	3218.71	112.7	96.3	98.5	94.1	100.7	97.6
[R].FSTQGMGTFNPADYSDSTSTDVCGTK.[L]	1xTMT6plex [K26]; 1xTMT6plex [N-Term]; 1xIA-DTB [C23]	Q5T6F2	UBAP2_C208	3684.76	71	126.4	113.5	88.7	102	98.3
[R].AQILVADTWSVLEGKGDGCFK.[D]	2xTMT6plex [K15; K21]; 1xTMT6plex [N-Term]; 1xIA-DTB [C19]	Q5T6V5	QSPP_C227	3433.91	113.9	99.2	111.9	94.6	84.8	95.5
[K].FMLVLASNLPEQFDCAINSR.[I]	1xOxidation [M2]; 1xTMT6plex [N-Term]; 1xIA-DTB [C15]	Q5T9A4	ATD3B_C461	3022.57	104.2	99.2	93.7	90.4	100.1	112.4
[R].VSAGNDMACLTTDLLTALGK.[I]	1xTMT6plex [K20]; 1xTMT6plex [N-Term]; 1xIA-DTB [C9]	Q5TAX3	TUT4_C477	2961.62	103.3	90.1	93.7	110.6	105.2	97
[K].GHIENPGDGLFAPLPTYSYCK.[Q]	1xTMT6plex [K21]; 1xTMT6plex [N-Term]; 1xIA-DTB [C20]	Q5TB30	DEP1A_C722	3246.7	81.1	124.4	70.5	79.4	126.7	117.8
[K].FQPLDQVVVDNVFPNCILLLK.[L]	1xTMT6plex [K21]; 1xTMT6plex [N-Term]; 1xIA-DTB [C16]	Q5TBB1	RNH2B_C125	3381.94	100.8	79.1	90.8	119.9	125.9	83.5
[K].YKGNDYSQYSPWSCDTIGSYIGTK.[D]	2xTMT6plex [K2; K24]; 1xTMT6plex [N-Term]; 1xIA-DTB [C14]	Q5TC82	RC3H1_C815	3930	104.3	114.3	98.6	75.2	67.3	140.3
[K].HFLSDTGMACR.[S]	1xTMT6plex [N-Term]; 1xIA-DTB [C10]	Q5TFE4	NT5D1_C119	1976	305.9	231.7	13.4	12.9	17.2	18.9
[R].KDLLVENVPYCDAPTQKQ.[-]	2xTMT6plex [K1; K17]; 1xTMT6plex [N-Term]; 1xIA-DTB [C11]	Q5U5X0	LYRM7_C97	3257.82	81.8	100.1	109.1	109.7	93.4	105.9
[K].RCDIPAMYNNLDVSQDTLFTQYSQEEPMEIPTLTR.[K]	1xTMT6plex [N-Term]; 1xIA-DTB [C2]	Q5UIP0	RIF1_C1077	4857.37	51.1	145.3	105.6	108.5	91.5	98.1
[R].DSFDNCSLGESSK.[I]	1xTMT6plex [K13]; 1xTMT6plex [N-Term]; 1xIA-DTB [C6]	Q5UIP0	RIF1_C1692	2356.19	85.9	105.1	102	105.3	93.6	108
[R].CVWSPLASPSTSILK.[R]	1xTMT6plex [K15]; 1xTMT6plex [N-Term]; 1xIA-DTB [C1]	Q5UIP0	RIF1_C2169	2556.46	88.5	123.2	97.8	103.8	84.5	102.2
[K].CLISEMAK.[E]	1xTMT6plex [K8]; 1xTMT6plex [N-Term]; 1xIA-DTB [C1]	Q5UIP0	RIF1_C2274	1862.06	82.3	118.5	99.6	95.5	96.5	107.7
[K].KCLISEMAK.[E]	2xTMT6plex [K1; K9]; 1xTMT6plex [N-Term]; 1xIA-DTB [C2]	Q5UIP0	RIF1_C2274	2219.32	102.5	120.9	88.7	96.2	93	98.6
[K].SLIDNFALNPDILCSAK.[R]	1xTMT6plex [K17]; 1xTMT6plex [N-Term]; 1xIA-DTB [C14]	Q5UIP0	RIF1_C312	2801.56	90.1	100	110.5	98.1	102.4	98.9
[K].THISSQNSELSSAALQALGFCLYNPK.[I]	1xTMT6plex [K26]; 1xTMT6plex [N-Term]; 1xIA-DTB [C21]	Q5UIP0	RIF1_C82	3746.99	55.6	114.5	100.3	127.1	124.8	77.7
[R].FSGCTLTDGTLK.[K]	1xTMT6plex [K12]; 1xTMT6plex [N-Term]; 1xIA-DTB [C4]	Q5VIR6	VPS53_C365	2210.23	81.8	110.2	99.4	106.8	96.1	105.7
[R].AHSNPDFLPVDNCLQSVLGQR.[V]	1xTMT6plex [N-Term]; 1xIA-DTB [C13]	Q5VSL9	STRP1_C798	3048.59	48.1	136.4	107.9	107.9	94.9	104.8
[R].GSGFIMCSGK.[E]	1xTMT6plex [K10]; 1xTMT6plex [N-Term]; 1xIA-DTB [C7]	Q5VTB9	RN220_C382	1954.07	144.3	117.8	80.6	76.3	94.4	86.5
[R].GVGTGGIVSTAFCLLYK.[L]	1xTMT6plex [K17]; 1xTMT6plex [N-Term]; 1xIA-DTB [C13]	Q5VTL8	PR38B_C130	2653.52	156.9	84.8	78.1	98.8	99.2	82.3
[R].CMQSQFSVLYNESLQLK.[A]	1xTMT6plex [K17]; 1xTMT6plex [N-Term]; 1xIA-DTB [C1]	Q5VTR2	BRE1A_C383	2985.59	80	94.8	107.2	104.8	114.2	98.9
[K].LSPQACSFTK.[A]	1xTMT6plex [K10]; 1xTMT6plex [N-Term]; 1xIA-DTB [C6]	Q5VUA4	ZN318_C1860	2049.16	94.5	122.5	90.6	87.7	91.5	113.1
[K].TINSAGLGPSPCLPDLVDFVTR.[T]	1xTMT6plex [N-Term]; 1xIA-DTB [C12]	Q5VUA4	ZN318_C2168	3010.62	88.5	102.6	121.1	97.4	91.6	98.8
[R].GCLQNEKQDETLSSSEITLWTEK.[Q]	2xTMT6plex [K7; K23]; 1xTMT6plex [N-Term]; 1xIA-DTB [C2]	Q5VVJ2	MYSM1_C279	3836.04	106.8	94.7	101.7	94.9	101	100.9
[R].SAAATALSLLVPVFIISCK.[E]	1xTMT6plex [K19]; 1xTMT6plex [N-Term]; 1xIA-DTB [C18]	Q5VW36	FOCAD_C1058	2871.71	74.3	110.9	99.8	119.7	100.7	94.7
[K].LSCDTRPLILK.[T]	1xTMT6plex [K11]; 1xTMT6plex [N-Term]; 1xIA-DTB [C3]	Q5VW36	FOCAD_C657	2226.34	95.5	109.1	97.4	93.6	94.5	109.9
[K].VIPILSTLNCALLETKK.[S]	2xTMT6plex [K16; K17]; 1xTMT6plex [N-Term]; 1xIA-DTB [C10]	Q5VWN6	TASO2_C186	3052.88	108.4	109.2	104.6	79.6	84.9	113.3
[K].VIPILSTLNCALLETK.[K]	1xTMT6plex [K16]; 1xTMT6plex [N-Term]; 1xIA-DTB [C10]	Q5VWN6	TASO2_C186	2695.62	96.5	99.9	99.1	98.8	103.4	102.2
[R].AHAAEVSFRDPNCLLPFIK.[T]	1xTMT6plex [K19]; 1xTMT6plex [N-Term]; 1xIA-DTB [C13]	Q5VWN6	TASO2_C873	3095.72	67.1	138.2	98.9	89.4	107	99.4
[R].TIAALLPCLLDK.[G]	1xTMT6plex [K12]; 1xTMT6plex [N-Term]; 1xIA-DTB [C8]	Q5VYK3	ECM29_C1257	2238.37	88.1	76.2	101.3	96.9	112.2	125.3
[K].SEKEECNLWTEVWQENVPGSFGGIR.[L]	1xTMT6plex [K3]; 1xTMT6plex [N-Term]; 1xIA-DTB [C6]	Q5VYK3	ECM29_C1503	3861.96	90.4	86.9	98.7	102.4	98.2	123.4
[K].DIALVQQLFEALCKEEPETR.[L]	1xTMT6plex [K14]; 1xTMT6plex [N-Term]; 1xIA-DTB [C13]	Q5VYK3	ECM29_C449	3299.81	75.1	76.6	127.3	105.1	100.5	115.4
[R].QAACIWLLSLVR.[K]	1xTMT6plex [N-Term]; 1xIA-DTB [C4]	Q5VYK3	ECM29_C963	2111.24	88.8	84.7	95.9	114.2	132.8	83.5
[R].KGPCAVSSNPYAFK.[N]	2xTMT6plex [K1; K14]; 1xTMT6plex [N-Term]; 1xIA-DTB [C4]	Q5VYS8	TUT7_C70	2665.51	101.4	107.8	93.2	98.9	100.4	98.3
[R].LIPGCEVILATPYGR.[C]	1xTMT6plex [N-Term]; 1xIA-DTB [C5]	Q5VZ89	DEN4C_C115	2340.33	130.4	124.8	98.9	89.6	69.8	86.6
[R].SLIQGAFQGCSVSGMTLK.[Y]	1xTMT6plex [K18]; 1xTMT6plex [N-Term]; 1xIA-DTB [C10]	Q5VZL5	ZMYM4_C1198	2794.54	74.8	114	105.9	110.3	93.1	101.8
[R].SCVPNSPMWYSTFPIDPGTLDTMLTR.[I]	1xTMT6plex [N-Term]; 1xIA-DTB [C2]	Q5VZL5	ZMYM4_C1499	3667.82	97.5	82.9	114.1	119.6	95.1	90.8
[K].AGEVVPPAMYQFSQYVCQQTGLQIPQLPAPPK.[I]	1xTMT6plex [K32]; 1xTMT6plex [N-Term]; 1xIA-DTB [C17]	Q5XKP0	MIC13_C60	4453.38	120.8	87.5	95.4	94.6	100.6	101.1
[R].QSFCAQEAPTASQGLLK.[L]	1xTMT6plex [K17]; 1xTMT6plex [N-Term]; 1xIA-DTB [C4]	Q66K14	TBC9B_C444	2746.5	83.3	100.2	101.9	109.7	102.2	102.6
[R].VLFPGCTPPACLLDGLVR.[L]	1xCarbamidomethyl [C6]; 1xTMT6plex [N-Term]; 1xIA-DTB [C11]	Q66K74	MAP1S_C440	2666.47	111.3	92.6	106.4	92.8	89.7	107.3
[K].APIPCEVVK.[A]	1xTMT6plex [K9]; 1xTMT6plex [N-Term]; 1xIA-DTB [C5]	Q68CP9	ARID2_C711	1923.15	113.3	98.4	95	99.1	98.4	95.7
[K].RVEDILQALVVCPNLLR.[C]	1xTMT6plex [N-Term]; 1xIA-DTB [C12]	Q68DK2	ZFY26_C60	2689.57	115.5	99.6	92.7	90.9	93.7	107.7
[R].KSPLGGGGGSGASSQAACLK.[Q]	2xTMT6plex [K1; K20]; 1xTMT6plex [N-Term]; 1xIA-DTB [C18]	Q68DK7	MSL1_C221	2929.65	111	107.5	94.2	95.4	93.9	98
[R].VASDSPKPALTLQQGQEFSAGGQNAENLCQFFK.[I]	2xTMT6plex [K7; K33]; 1xTMT6plex [N-Term]; 1xIA-DTB [C29]	Q69YH5	CDCA2_C750	4707.48	94.2	137.7	84.1	80.4	88.5	115.1
[K].QILAPVEESACQFFFDLNEK.[Q]	1xTMT6plex [K20]; 1xTMT6plex [N-Term]; 1xIA-DTB [C11]	Q69YN2	C19L1_C288	3295.74	86.9	98.2	116.6	96.3	94.6	107.4
[R].ELVPLLYFSCPYK.[T]	1xTMT6plex [K13]; 1xTMT6plex [N-Term]; 1xIA-DTB [C10]	Q69YN4	VIR_C353	2539.44	119.1	91.2	102.2	88.2	105.1	94.2
[R].KGSSGNASEVSVACLTER.[I]	1xTMT6plex [K1]; 1xTMT6plex [N-Term]; 1xIA-DTB [C14]	Q69YQ0	CYTSA_C395	2762.49	83.3	100.1	108.7	115.6	98	94.2
[R].ACALQVLSAILEGSK.[Q]	1xTMT6plex [K15]; 1xTMT6plex [N-Term]; 1xIA-DTB [C2]	Q6AI08	HEAT6_C476	2470.45	100.1	82.4	87.6	90	115.7	124.1
[R].GCIGTFSAMNLHSGLR.[E]	1xTMT6plex [N-Term]; 1xIA-DTB [C2]	Q6DCA0	AMERL_C153	2402.26	232.5	163.6	40.5	51.3	59.9	52.2
[K].FGVICLEDLIHEIAFPGK.[H]	1xTMT6plex [K18]; 1xTMT6plex [N-Term]; 1xIA-DTB [C5]	Q6DKI1	RL7L_C193	2968.67	87.9	67	109.5	127.6	84.6	123.4
[K].GVVRPSMSQCSSLK.[K]	1xTMT6plex [K14]; 1xTMT6plex [N-Term]; 1xIA-DTB [C10]	Q6DN90	IQEC1_C890	2446.37	118.8	107	86.4	93.5	99.6	94.8
[R].ACLDDSYASGEGLKR.[S]	1xTMT6plex [K14]; 1xTMT6plex [N-Term]; 1xIA-DTB [C2]	Q6DN90	IQEC1_C906	2552.35	110.6	105.1	91.1	95.2	91	107.1
[K].LCSALTLSGLVEVK.[E]	1xTMT6plex [K14]; 1xTMT6plex [N-Term]; 1xIA-DTB [C2]	Q6FI81	CPIN1_C116	2400.43	81.6	105.5	100.5	103.3	103.6	105.5
[R].CASCPYLGMPAFKPGEK.[V]	1xCarbamidomethyl [C4]; 2xTMT6plex [K13; K17]; 1xTMT6plex [N-Term]; 1xIA-DTB [C1]	Q6FI81	CPIN1_C285	3052.64	84.9	120.8	97.8	86.9	93.2	116.4
[R].ILRPGGCLFLKEPVETAVDNNSK.[V]	2xTMT6plex [K11; K23]; 1xTMT6plex [N-Term]; 1xIA-DTB [C7]	Q6FI81	CPIN1_C92	3697.11	77	99.3	104.3	103.7	103.7	111.9
[R].EREGAPEPASCVK.[E]	1xTMT6plex [K13]; 1xTMT6plex [N-Term]; 1xIA-DTB [C11]	Q6IBW4	CNDH2_C309	2340.27	96.3	96.3	106.2	97.3	101.7	102.2
[K].GRPYSVPPCVEEALGQK.[R]	1xTMT6plex [K17]; 1xTMT6plex [N-Term]; 1xIA-DTB [C9]	Q6IBW4	CNDH2_C342	2797.54	109.2	90.2	101.9	95.5	92.6	110.5
[K].ELPPELLAEIESTMPLCER.[V]	1xTMT6plex [N-Term]; 1xIA-DTB [C17]	Q6KC79	NIPBL_C1066	2908.54	92.3	97	122.1	93.7	98.7	96.2
[R].FVLCRPQLAEQYYDMLIER.[I]	1xTMT6plex [N-Term]; 1xIA-DTB [C4]	Q6KC79	NIPBL_C1841	3125.65	83.1	97	109.6	106.9	93.2	110.2
[K].ACTQLVDNLVEHILK.[Y]	1xTMT6plex [K15]; 1xTMT6plex [N-Term]; 1xIA-DTB [C2]	Q6KC79	NIPBL_C1971	2663.53	111.7	82.8	94.1	111	97.4	103
[K].GSRPPLILQSQSLPCSSPR.[D]	1xTMT6plex [N-Term]; 1xIA-DTB [C15]	Q6KC79	NIPBL_C304	2761.53	102.9	103.1	89.3	95.8	104.8	104.1
[K].SRPNASGGAACSGPGPEPAVFCEPVVK.[L]	1xCarbamidomethyl [C22]; 1xTMT6plex [K27]; 1xTMT6plex [N-Term]; 1xIA-DTB [C11]	Q6L8Q7	PDE12_C108	3608.87	87.5	104.5	121.8	92.8	90.7	102.6
[R].QCVTPSEVVPVTVLAVQR.[Y]	1xTMT6plex [N-Term]; 1xIA-DTB [C2]	Q6NSI4	RADX_C60	2663.51	114.2	106.4	108	81	91.4	99.1
[K].DSVNPGVMVLLGCGALSSTCGQLASYPLALVR.[T]	1xCarbamidomethyl [C13]; 1xTMT6plex [N-Term]; 1xIA-DTB [C20]	Q6NUK1	SCMC1_C398	3987.11	95.4	77.9	99.3	122.7	108.5	96.2
[R].NLFPLFSHYCK.[R]	1xTMT6plex [K11]; 1xTMT6plex [N-Term]; 1xIA-DTB [C10]	Q6NUQ1	RINT1_C720	2336.3	73.3	106.1	101.4	104.9	108.1	106.3
[K].LSNPPATCTPGKPSSK.[S]	2xTMT6plex [K12; K16]; 1xTMT6plex [N-Term]; 1xIA-DTB [C8]	Q6NXT6	TAPT1_C474	2781.59	98.4	116.6	94.5	100.1	99.3	91.1
[R].IFGSIPMQACQQK.[D]	1xTMT6plex [K13]; 1xTMT6plex [N-Term]; 1xIA-DTB [C10]	Q6NZY4	ZCHC8_C393	2418.34	85.8	128.9	113.1	88.3	81.8	102
[K].LHCAFASLPK.[H]	1xTMT6plex [K10]; 1xTMT6plex [N-Term]; 1xIA-DTB [C3]	Q6P0N0	M18BP_C890	2054.2	34.8	137.1	117.2	104.1	132.1	74.7
[K].LISAMLCAALYPNVVQVK.[S]	1xTMT6plex [K18]; 1xTMT6plex [N-Term]; 1xIA-DTB [C7]	Q6P158	DHX57_C1218	2900.69	98.4	88	83.5	68.8	130.6	130.8
[K].KALIVGHCMPGPR.[M]	1xTMT6plex [K1]; 1xTMT6plex [N-Term]; 1xIA-DTB [C8]	Q6P1L8	RM14_C90	2346.37	104.6	104.2	99	100.3	96.5	95.4
[K].ALIVGHCMPGPR.[M]	1xTMT6plex [N-Term]; 1xIA-DTB [C7]	Q6P1L8	RM14_C90	1989.11	112.9	97	98.6	101.9	94.7	94.9
[R].SAASSSVSFSPGGGGGGAAAAAAAACR.[G]	1xTMT6plex [N-Term]; 1xIA-DTB [C26]	Q6P1R3	MSD2_C99	2934.47	88.8	106.5	98.9	94.5	96.2	115.1
[R].KAVAIPVFANGNIQCLQDVER.[C]	1xTMT6plex [K1]; 1xTMT6plex [N-Term]; 1xIA-DTB [C15]	Q6P1R4	DUS1L_C213	3252.83	91.2	95.8	119.9	94.7	89.5	108.9
[R].YEAAFPFLSPCGR.[E]	1xTMT6plex [N-Term]; 1xIA-DTB [C11]	Q6P1X6	CH082_C98	2196.15	90.4	99.9	105.4	107.4	92.3	104.5
[K].GHSTCLSEGALSPDGTVLATASHDGYVK.[F]	1xTMT6plex [K28]; 1xTMT6plex [N-Term]; 1xIA-DTB [C5]	Q6P2E9	EDC4_C299	3740.93	65.5	100.4	105.2	103.4	128.6	96.9
[K].MWCTVSWTCLQTIR.[F]	1xCarbamidomethyl [C9]; 1xTMT6plex [N-Term]; 1xIA-DTB [C3]	Q6P2E9	EDC4_C384	2523.29	88.4	107.5	105.2	106.5	92.4	100
[K].GSELQLPFQACLK.[V]	1xTMT6plex [K13]; 1xTMT6plex [N-Term]; 1xIA-DTB [C11]	Q6P2Q9	PRP8_C1896	2401.37	130.2	83.9	80.8	105.9	108.3	90.8
[R].EHCPAGQPVK.[V]	1xTMT6plex [K10]; 1xTMT6plex [N-Term]; 1xIA-DTB [C3]	Q6P2Q9	PRP8_C435	2033.14	30.4	162	103.3	92.3	148.1	63.9
[K].LDWVEVGLQVCR.[Q]	1xTMT6plex [N-Term]; 1xIA-DTB [C11]	Q6P2Q9	PRP8_C497	2155.19	99.5	101.7	77.1	93.7	122.8	105.2
[R].GGQSQIVIDDATILILGGCGGPNALFK.[D]	1xTMT6plex [K27]; 1xTMT6plex [N-Term]; 1xIA-DTB [C19]	Q6P3S6	FBX42_C302	3625.02	138.3	102.3	102.3	80.5	80.7	95.9
[R].SPLLFTLAENCIDQVMK.[L]	1xTMT6plex [K17]; 1xTMT6plex [N-Term]; 1xIA-DTB [C11]	Q6P3X3	TTC27_C210	2889.6	113.7	83.6	81.1	114.8	108.6	98.3
[R].LLVTSGLPGCYLQVWQVAEDSDVIK.[A]	1xTMT6plex [K25]; 1xTMT6plex [N-Term]; 1xIA-DTB [C10]	Q6P4I2	WDR73_C106	3701.04	106.9	96.1	117	93	89.3	97.7
[R].ILSDTTLWLCR.[I]	1xTMT6plex [N-Term]; 1xIA-DTB [C10]	Q6P996	PDXD1_C126	2059.16	100.3	100.8	92.6	101	111.5	93.8
[R].SFCSQFLPEEQAEIDQLFDALSSDKNSPNVSSK.[S]	2xTMT6plex [K25; K33]; 1xTMT6plex [N-Term]; 1xIA-DTB [C3]	Q6P9B6	MEAK7_C13	4857.49	83.8	100.3	121.1	87.1	89.7	118
[K].CVGALVGLAVLELNNKEADSIK.[N]	2xTMT6plex [K16; K22]; 1xTMT6plex [N-Term]; 1xIA-DTB [C1]	Q6PD62	CTR9_C231	3453.01	52.5	118.6	122.3	102.1	85	119.6
[K].AWLPEVMILVCDR.[V]	1xTMT6plex [N-Term]; 1xIA-DTB [C11]	Q6PD74	AAGAB_C114	2283.26	89.4	92.9	73.2	87.6	140.2	116.6
[R].GPCSWGLCVQEDSLQAWHNGEAQR.[L]	1xCarbamidomethyl [C8]; 1xTMT6plex [N-Term]; 1xIA-DTB [C3]	Q6PJ69	TRI65_C421	3466.66	131.8	75.7	115.1	92.5	85.2	99.6
[R].VACLLERDPIPAAHSFVDLLLCVAR.[S]	1xCarbamidomethyl [C22]; 1xTMT6plex [N-Term]; 1xIA-DTB [C3]	Q6PJG6	BRAT1_C246	3516.94	108.4	76.2	114.5	106.3	85.1	109.5
[R].TQAFQVLLQPLACVLK.[A]	1xTMT6plex [K16]; 1xTMT6plex [N-Term]; 1xIA-DTB [C13]	Q6PJG6	BRAT1_C326	2739.64	72.4	95.1	116.2	105.4	86.9	123.9
[K].TPGCSDLGPLIPQFLR.[E]	1xTMT6plex [N-Term]; 1xIA-DTB [C4]	Q6PJG6	BRAT1_C487	2452.36	103	82.6	95.4	112.2	109	97.9
[K].DLVQVWSLATVATDLCLGPK.[S]	1xTMT6plex [K20]; 1xTMT6plex [N-Term]; 1xIA-DTB [C16]	Q6PJI9	WDR59_C706	3096.75	100.7	107	95.2	66.5	122.7	107.8
[R].LCEPEVLNSLEETYSPFFR.[N]	1xTMT6plex [N-Term]; 1xIA-DTB [C2]	Q6PJT7	ZC3HE_C261	3011.54	104.9	94.6	109.5	91.1	97.2	102.7
[R].TASISSSPSEGTPTVGSYGCTPQSLPK.[F]	1xTMT6plex [K27]; 1xTMT6plex [N-Term]; 1xIA-DTB [C20]	Q6PKG0	LARP1_C864	3606.87	118.4	155.6	35.6	26	117.3	147
[K].VSPPLMAPPCIWTFAK.[V]	1xTMT6plex [K16]; 1xTMT6plex [N-Term]; 1xIA-DTB [C10]	Q6PL24	TMED8_C161	2725.53	84.1	101.1	112.6	97	95.8	109.5
[R].CLVDASDTSQGRGPDDLQR.[L]	1xTMT6plex [N-Term]; 1xIA-DTB [C1]	Q6SZW1	SARM1_C311	2771.39	68.5	102.8	123.5	103.4	89.4	112.5
[R].YTQQGFGNLPICMAK.[T]	1xTMT6plex [K15]; 1xTMT6plex [N-Term]; 1xIA-DTB [C12]	Q6UB35	C1TM_C906	2638.42	91.9	102.4	102.1	100.9	96.5	106.2
[K].IDRYTQQGFGNLPICMAK.[T]	1xTMT6plex [K18]; 1xTMT6plex [N-Term]; 1xIA-DTB [C15]	Q6UB35	C1TM_C906	3022.64	67.8	113.6	126.9	100.9	88.4	102.4
[R].LTYPTCGIGYPVSSAFAFQNTFPHSISAK.[N]	1xTMT6plex [K29]; 1xTMT6plex [N-Term]; 1xIA-DTB [C6]	Q6UVJ0	SAS6_C525	4072.14	137	104.1	77.1	75.6	80.7	125.5
[R].ALQMEGLQEDSILCLPAAYCER.[A]	1xCarbamidomethyl [C14]; 1xTMT6plex [N-Term]; 1xIA-DTB [C20]	Q6W2J9	BCOR_C1016	3248.63	134.6	119.9	99.6	67.6	78.1	100.2
[R].QVSASLLFSCSK.[D]	1xTMT6plex [K12]; 1xTMT6plex [N-Term]; 1xIA-DTB [C10]	Q6W2J9	BCOR_C1709	2237.27	99	126.2	78.4	78.9	104.4	113.1
[R].EGLRVPGNIVYSSLCGLGSEK.[G]	1xTMT6plex [K21]; 1xTMT6plex [N-Term]; 1xIA-DTB [C15]	Q6W2J9	BCOR_C94	3145.74	89	131.6	91.8	73.2	85.1	129.2
[R].VPGNIVYSSLCGLGSEK.[G]	1xTMT6plex [K17]; 1xTMT6plex [N-Term]; 1xIA-DTB [C11]	Q6W2J9	BCOR_C94	2690.5	126.7	124	76.1	76	93.4	103.8
[K].RACDESFQPLGDIMK.[M]	1xTMT6plex [K15]; 1xTMT6plex [N-Term]; 1xIA-DTB [C3]	Q6Y7W6	GGYF2_C573	2677.42	87.4	104.7	112.1	88.4	85	122.5
[R].ACDESFQPLGDIMK.[M]	1xTMT6plex [K14]; 1xTMT6plex [N-Term]; 1xIA-DTB [C2]	Q6Y7W6	GGYF2_C573	2521.32	58.6	92.3	134.6	110.2	110.4	94
[K].LPSSSTWGQQSNTTACQSQATLSLAEIQKLEEERER.[Q]	1xTMT6plex [K29]; 1xTMT6plex [N-Term]; 1xIA-DTB [C16]	Q6Y7W6	GGYF2_C938	4974.56	87	95.5	113.6	101.4	92.3	110.3
[K].QHCAYTIAK.[Y]	1xTMT6plex [K9]; 1xTMT6plex [N-Term]; 1xIA-DTB [C3]	Q6YN16	HSDL2_C166	2002.13	24.7	124.1	128.8	123.7	139.1	59.6
[K].TAIHTAAMDMLGGPGIESQCR.[K]	1xTMT6plex [N-Term]; 1xIA-DTB [C20]	Q6YN16	HSDL2_C218	2897.46	78.8	95.3	109.3	104.1	96.8	115.7
[R].EWLETAGPWGQAAWQDCQGVQGLLAK.[L]	1xTMT6plex [K26]; 1xTMT6plex [N-Term]; 1xIA-DTB [C17]	Q6ZRI6	CO039_C808	3809.98	140.6	101	116.9	82.1	80.2	79.3
[K].LREWLETAGPWGQAAWQDCQGVQGLLAK.[L]	1xTMT6plex [K28]; 1xTMT6plex [N-Term]; 1xIA-DTB [C19]	Q6ZRI6	CO039_C808	4079.17	103.3	115.3	125.3	90.7	71.7	93.8
[K].CIVQVIR.[K]	1xTMT6plex [N-Term]; 1xIA-DTB [C1]	Q6ZRQ5	MMS22_C1068	1568.95	72.9	111.1	109.4	102.8	99.2	104.6
[R].LIQYDCGK.[L]	1xTMT6plex [K8]; 1xTMT6plex [N-Term]; 1xIA-DTB [C6]	Q6ZRS2	SRCAP_C2042	1907.08	103.8	103.5	98.6	99.1	102.1	93
[R].CLYDDFMAQTTTK.[E]	1xTMT6plex [K13]; 1xTMT6plex [N-Term]; 1xIA-DTB [C1]	Q6ZRS2	SRCAP_C867	2504.29	88	98.8	109.9	97.3	103	103.1
[K].SAMSEIEGIQSLICR.[Q]	1xTMT6plex [N-Term]; 1xIA-DTB [C14]	Q6ZSZ5	ARHGI_C887	2375.26	95.7	105.3	102.5	97.9	96.2	102.2
[K].LSNNPQLSCSSSLIK.[T]	1xTMT6plex [K15]; 1xTMT6plex [N-Term]; 1xIA-DTB [C9]	Q6ZU65	UBN2_C966	2558.44	86.4	95.5	94.2	100.2	114.8	108.9
[R].CVTAHWLNTVLK.[K]	1xTMT6plex [K12]; 1xTMT6plex [N-Term]; 1xIA-DTB [C1]	Q6ZW49	PAXI1_C671	2352.36	84.9	112.1	99.5	99.5	93.8	110.3
[K].YFYITPGICPSLSTMK.[A]	1xTMT6plex [K16]; 1xTMT6plex [N-Term]; 1xIA-DTB [C9]	Q6ZW49	PAXI1_C985	2788.52	93.2	101.6	98.2	91.2	97.4	118.4
[K].KFDEGENSLGQNSFSTTNNVCNQNQEIASR.[H]	1xTMT6plex [K1]; 1xTMT6plex [N-Term]; 1xIA-DTB [C21]	Q6ZWT7	MBOA2_C505	4299.11	77.7	101.4	117.2	110.6	98	95.1
[K].ALSCQEVTDDEVLDASCLLDVLR.[M]	1xCarbamidomethyl [C4]; 1xTMT6plex [N-Term]; 1xIA-DTB [C17]	Q70CQ3	UBP30_C142	3302.68	108.6	91	112	87.9	97.5	103
[K].GLVPGLVNLGNTCFMNSLLQGLSACPAFIR.[W]	1xCarbamidomethyl [C25]; 1xTMT6plex [N-Term]; 1xIA-DTB [C13]	Q70CQ3	UBP30_C77	3901.09	89.2	92.7	94.7	119.5	99.1	104.8
[K].GLVPGLVNLGNTCFMNSLLQGLSACPAFIR.[W]	1xCarbamidomethyl [C25]; 1xOxidation [M15]; 1xTMT6plex [N-Term]; 1xIA-DTB [C13]	Q70CQ3	UBP30_C77	3917.08	118.3	104.8	98.7	108.2	73.6	96.3
[K].LNLSGVNLPGVLQQGCVSAK.[A]	1xTMT6plex [K20]; 1xTMT6plex [N-Term]; 1xIA-DTB [C16]	Q70E73	RAPH1_C1045	2964.71	94.6	87.8	91.1	130.9	109.5	86.2
[R].DHPVFCALVNGEGEVTDFLR.[L]	1xTMT6plex [N-Term]; 1xIA-DTB [C6]	Q7KZ85	SPT6H_C796	2956.52	62	125.7	89.3	103.9	135.9	83.1
[R].DVQIILESCHNQNILGTILHPNGNITELLLK.[E]	1xTMT6plex [K31]; 1xTMT6plex [N-Term]; 1xIA-DTB [C9]	Q7KZF4	SND1_C268	4420.48	187.2	50.1	73.2	86.7	93.1	109.7
[K].ERFDPTQFQDCIIQGLTETGTDLEAVAK.[F]	1xTMT6plex [K28]; 1xTMT6plex [N-Term]; 1xIA-DTB [C11]	Q7L1Q6	5MP2_C35	4093.13	74.6	105	115.4	93.4	95.9	115.7
[R].FDPTQFQDCIIQGLTETGTDLEAVAK.[F]	1xTMT6plex [K26]; 1xTMT6plex [N-Term]; 1xIA-DTB [C9]	Q7L1Q6	5MP2_C35	3807.99	86	82.8	120.9	101	90	119.4
[R].TDVCVFAAQEDLETMQAFAQVFNK.[L]	1xTMT6plex [K24]; 1xTMT6plex [N-Term]; 1xIA-DTB [C4]	Q7L1Q6	5MP2_C96	3672.88	78.2	86.1	113.6	108.8	107.4	106
[R].LDAMPVCLLLLGTQR.[E]	1xTMT6plex [N-Term]; 1xIA-DTB [C7]	Q7L1V2	MON1B_C349	2381.36	79.8	103.1	106.6	88.5	92.3	129.6
[K].LSTLTLLWPCPMTFVAK.[G]	1xTMT6plex [K17]; 1xTMT6plex [N-Term]; 1xIA-DTB [C10]	Q7L2E3	DHX30_C286	2888.65	78.8	110.9	110.1	102.2	99	99
[R].GGALLFCTVGILLR.[K]	1xTMT6plex [N-Term]; 1xIA-DTB [C7]	Q7L2E3	DHX30_C535	2171.29	112.7	81	79.5	114.1	118	94.6
[R].GEPGGILCFLPGWQEIK.[G]	1xTMT6plex [K17]; 1xTMT6plex [N-Term]; 1xIA-DTB [C8]	Q7L2E3	DHX30_C673	2811.56	106.4	62	110	95	121.8	104.8
[K].VAASCGAIQYIPTELDQVRK.[W]	1xTMT6plex [K20]; 1xTMT6plex [N-Term]; 1xIA-DTB [C5]	Q7L2H7	EIF3M_C134	3129.75	87.2	88.1	100.6	103.5	103.1	117.6
[R].LLYEALVDCKK.[S]	2xTMT6plex [K10; K11]; 1xTMT6plex [N-Term]; 1xIA-DTB [C9]	Q7L2H7	EIF3M_C175	2491.49	96.6	92.5	104.6	93.9	102.2	110.2
[R].LLYEALVDCK.[K]	1xTMT6plex [K10]; 1xTMT6plex [N-Term]; 1xIA-DTB [C9]	Q7L2H7	EIF3M_C175	2134.23	109	89.1	100.3	100.8	100	100.7
[K].DITDPLSLNTCTDEGHVVLASPLK.[T]	1xTMT6plex [K24]; 1xTMT6plex [N-Term]; 1xIA-DTB [C11]	Q7L2J0	MEPCE_C244	3505.9	98.4	85.7	116.3	90.2	86.7	122.8
[K].MCLWSTDAISK.[D]	1xTMT6plex [K11]; 1xTMT6plex [N-Term]; 1xIA-DTB [C2]	Q7L3B6	CD37L_C124	2222.21	98.6	111.3	99	103.7	93	94.4
[R].LCCGLSMFEVILTR.[I]	1xCarbamidomethyl [C3]; 1xTMT6plex [N-Term]; 1xIA-DTB [C2]	Q7L576	CYFP1_C1087	2380.28	85	109.8	110.9	97.9	88	108.4
[K].CNEQPNRVEIYEK.[T]	1xTMT6plex [K13]; 1xTMT6plex [N-Term]; 1xIA-DTB [C1]	Q7L576	CYFP1_C98	2589.39	77.9	118.5	96.8	100.9	92.8	113.1
[R].GQIVGTPGSSGETTQPICVEAFSGLR.[L]	1xTMT6plex [N-Term]; 1xIA-DTB [C18]	Q7L590	MCM10_C246	3329.74	142.7	106	78.1	66.1	104.6	102.4
[K].AAVPLGGFLCNVADK.[S]	1xTMT6plex [K15]; 1xTMT6plex [N-Term]; 1xIA-DTB [C10]	Q7L8L6	FAKD5_C670	2442.39	132.8	119.7	97.5	83.3	75.6	91
[K].AIRPPCPDTAPPSSALHWLADLATQK.[A]	1xTMT6plex [K26]; 1xTMT6plex [N-Term]; 1xIA-DTB [C6]	Q7LBC6	KDM3B_C1212	3724.04	131.2	84.7	97.4	97.1	93.5	96.3
[K].NLFFQCMSQTLPTSNYFTTVSESLADDSSSR.[D]	1xTMT6plex [N-Term]; 1xIA-DTB [C6]	Q7LBC6	KDM3B_C529	4215.02	87.7	148.3	95.8	90.7	70.5	107
[K].QSLESLSSGLCK.[G]	1xTMT6plex [K12]; 1xTMT6plex [N-Term]; 1xIA-DTB [C11]	Q7LBC6	KDM3B_C569	2219.25	103.4	112	96.5	94.2	97.2	96.6
[R].AMSGAVPQDLAIFVEFDGCNWK.[Q]	1xTMT6plex [K22]; 1xTMT6plex [N-Term]; 1xIA-DTB [C19]	Q7LBC6	KDM3B_C72	3365.74	112.9	102.5	99.6	98.8	86.2	100
[K].YILANVGDQFCQLVMSEK.[E]	1xTMT6plex [K18]; 1xTMT6plex [N-Term]; 1xIA-DTB [C11]	Q7LBC6	KDM3B_C999	3025.63	91.4	83	97.1	121.4	103.3	103.8
[K].IEQEFLTEALPVGLIGMNCILMK.[Q]	1xTMT6plex [K23]; 1xTMT6plex [N-Term]; 1xIA-DTB [C19]	Q7LG56	RIR2B_C279	3529.96	95.9	57.8	100	118.4	131.9	96
[K].HHPDLIFCR.[K]	1xTMT6plex [N-Term]; 1xIA-DTB [C8]	Q7RTV0	PHF5A_C11	1876.02	66.2	136.4	98.6	67.4	131.3	100.2
[K].CVICDSYVRPCTLVR.[I]	2xCarbamidomethyl [C1; C4]; 1xTMT6plex [N-Term]; 1xIA-DTB [C11]	Q7RTV0	PHF5A_C40	2579.35	85.2	95.2	111.2	103.7	89.5	115.1
[R].KPLECLDAFGATGIMGLQWAK.[H]	2xTMT6plex [K1; K21]; 1xTMT6plex [N-Term]; 1xIA-DTB [C5]	Q7Z2T5	TRM1L_C279	3445.93	115.5	89.1	89.5	108.2	107.1	90.6
[K].VTINDLNENSVTLIQENCHLNK.[L]	1xTMT6plex [K22]; 1xTMT6plex [N-Term]; 1xIA-DTB [C18]	Q7Z2T5	TRM1L_C320	3478.87	95.2	109.7	111.8	98	81.9	103.4
[K].NSNVDSSYLESLYQSCPR.[G]	1xTMT6plex [N-Term]; 1xIA-DTB [C16]	Q7Z2W4	ZCCHV_C645	2800.38	69.5	96.8	123	91.7	88.6	130.5
[R].KNSNVDSSYLESLYQSCPR.[G]	1xTMT6plex [K1]; 1xTMT6plex [N-Term]; 1xIA-DTB [C17]	Q7Z2W4	ZCCHV_C645	3157.64	77.4	105.7	114.9	93.2	96.4	112.5
[K].TSSVSLTATFRPQEDFCFLSSK.[K]	1xTMT6plex [K22]; 1xTMT6plex [N-Term]; 1xIA-DTB [C17]	Q7Z2W4	ZCCHV_C721	3418.81	82.2	114.7	100.5	97	94.4	111.1
[R].ELLQFVSGCEAQAQR.[L]	1xTMT6plex [N-Term]; 1xIA-DTB [C9]	Q7Z2Z1	TICRR_C174	2417.28	100.2	96	112.2	89.5	91.7	110.4
[R].SCLSASALQALTQSPLLFQGK.[T]	1xTMT6plex [K21]; 1xTMT6plex [N-Term]; 1xIA-DTB [C2]	Q7Z2Z1	TICRR_C1838	3130.77	109.2	133.9	88	84.6	94	90.2
[K].GYFNNNIPPVEFTQENPFCR.[F]	1xTMT6plex [N-Term]; 1xIA-DTB [C19]	Q7Z3B4	NUP54_C171	3124.55	133.4	99.7	90	70.5	105.2	101.2
[K].AVGYSCMPSNKDEDGLVVLVFNK.[K]	2xTMT6plex [K11; K23]; 1xTMT6plex [N-Term]; 1xIA-DTB [C6]	Q7Z3B4	NUP54_C180	3682	136.2	103.1	113	116.5	66.4	64.9
[R].SASYPCAAPRPGAPETTALHGGFQR.[R]	1xTMT6plex [N-Term]; 1xIA-DTB [C6]	Q7Z3C6	ATG9A_C764	3280.68	97	101.4	104.8	101.2	85.3	110.2
[R].VVLFALCCNTEQAAEHFR.[N]	1xCarbamidomethyl [C7]; 1xTMT6plex [N-Term]; 1xIA-DTB [C8]	Q7Z3K3	POGZ_C987	2846.46	106.4	98	119.5	89.6	88.3	98.1
[K].LDDLSLPSNPFLCGILIQK.[L]	1xTMT6plex [K19]; 1xTMT6plex [N-Term]; 1xIA-DTB [C13]	Q7Z3T8	ZFY16_C1174	3053.75	99.6	104.1	100.2	94.6	98.1	103.5
[K].DVGLVKEEVDVAVITAAECLKEEGK.[T]	3xTMT6plex [K6; K21; K25]; 1xTMT6plex [N-Term]; 1xIA-DTB [C19]	Q7Z3T8	ZFY16_C292	4070.32	97.9	113.9	104.3	93.7	93.1	97.1
[R].IFFCDILSK.[K]	1xTMT6plex [K9]; 1xTMT6plex [N-Term]; 1xIA-DTB [C4]	Q7Z3V4	UBE3B_C399	2053.19	87.5	90	99.9	95.7	114.3	112.6
[K].ADLLLEPCSHYR.[F]	1xTMT6plex [N-Term]; 1xIA-DTB [C8]	Q7Z406	MYH14_C324	2155.15	117.1	96.4	99.3	92.7	101	93.6
[K].GCENLNIVQDK.[I]	1xTMT6plex [K11]; 1xTMT6plex [N-Term]; 1xIA-DTB [C2]	Q7Z417	NUFP2_C234	2200.22	127.2	87.8	78.2	107.5	112.9	86.4
[R].NSIENIANETVNVLWNICECSSR.[A]	1xCarbamidomethyl [C18]; 1xTMT6plex [N-Term]; 1xIA-DTB [C20]	Q7Z4Q2	HEAT3_C173	3403.69	83.2	82.6	90.2	121.5	82.6	139.9
[R].GNYSTDQLCVLDNVK.[M]	1xTMT6plex [K15]; 1xTMT6plex [N-Term]; 1xIA-DTB [C9]	Q7Z4Q2	HEAT3_C655	2636.41	123.7	74.1	97.6	99.8	101.4	103.4
[R].AKEGISINCGLLALGNVISALGDK.[S]	2xTMT6plex [K2; K24]; 1xTMT6plex [N-Term]; 1xIA-DTB [C9]	Q7Z4S6	KI21A_C299	3553.08	113.7	95.7	108.7	83.7	91	107.2
[K].EGISINCGLLALGNVISALGDK.[S]	1xTMT6plex [K22]; 1xTMT6plex [N-Term]; 1xIA-DTB [C7]	Q7Z4S6	KI21A_C299	3124.78	110.9	90.5	112.2	85.5	98.7	102.3
[R].GVPGAIVNVSSQCSQR.[A]	1xTMT6plex [N-Term]; 1xIA-DTB [C13]	Q7Z4W1	DCXR_C138	2340.27	121	89.5	98.8	97	98.3	95.4
[K].FLSFMNLTCAVGTTGQK.[S]	1xTMT6plex [K17]; 1xTMT6plex [N-Term]; 1xIA-DTB [C9]	Q7Z5K2	WAPL_C1170	2785.51	102.6	111.3	100.5	82.8	85.3	117.5
[R].IVEDDASISSCNK.[L]	1xTMT6plex [K13]; 1xTMT6plex [N-Term]; 1xIA-DTB [C11]	Q7Z5K2	WAPL_C160	2348.25	103.7	93	104.5	103.6	96.5	98.7
[R].LENLNEAIEEDIVQSVLRPTNCR.[T]	1xTMT6plex [N-Term]; 1xIA-DTB [C22]	Q7Z5K2	WAPL_C293	3393.8	105.4	91	108	98.7	95.8	101
[K].CSSYSESSEAAQLEEVTSVLEANSK.[I]	1xTMT6plex [K25]; 1xTMT6plex [N-Term]; 1xIA-DTB [C1]	Q7Z5K2	WAPL_C94	3615.81	73.9	105.4	102.2	111.7	91	115.8
[R].SLSSLELFLSCAQK.[Q]	1xTMT6plex [K14]; 1xTMT6plex [N-Term]; 1xIA-DTB [C11]	Q7Z6B0	CCD91_C424	2493.42	96.4	101	103.8	95.2	94	109.7
[R].VLPLPSENWGALVGEWCCHPDPFANK.[S]	1xCarbamidomethyl [C17]; 1xTMT6plex [K26]; 1xTMT6plex [N-Term]; 1xIA-DTB [C18]	Q7Z6J8	UBE3D_C144	3904.01	93.6	128.6	95.3	93.4	71.6	117.5
[R].KATWYTLTVPGDSPCAR.[V]	1xTMT6plex [K1]; 1xTMT6plex [N-Term]; 1xIA-DTB [C15]	Q7Z6M1	RABEK_C29	2833.54	91	99.7	111.9	88	101.4	108
[R].AESPEEVACR.[K]	1xTMT6plex [N-Term]; 1xIA-DTB [C9]	Q7Z6Z7	HUWE1_C1401	1828.94	129.1	79.4	86.5	102.5	121.4	81.2
[K].ACSPCSSQSSSSGICTDFWDLLVK.[L]	2xCarbamidomethyl [C5; C15]; 1xTMT6plex [K24]; 1xTMT6plex [N-Term]; 1xIA-DTB [C2]	Q7Z6Z7	HUWE1_C3372	3602.77	82.5	87.2	135.1	86.8	105.6	102.8
[R].AQCETLSPDGLPEEQPQTTK.[L]	1xTMT6plex [K20]; 1xTMT6plex [N-Term]; 1xIA-DTB [C3]	Q7Z6Z7	HUWE1_C3658	3139.63	118.3	87.6	102.9	99.1	93.9	98.1
[R].ALCQACALLDGLNR.[G]	1xCarbamidomethyl [C3]; 1xTMT6plex [N-Term]; 1xIA-DTB [C6]	Q7Z7A3	CTU1_C302	2256.22	88.4	92.6	117.2	106	84.1	111.8
[R].LVLSWADLGPDKYLSDKDFQCLIK.[L]	3xTMT6plex [K12; K17; K24]; 1xTMT6plex [N-Term]; 1xIA-DTB [C21]	Q7Z7A4	PXK_C196	4193.39	96.6	93	114.8	97.3	91.8	106.5
[K].GTPEQPQCGFSNAVVQILR.[L]	1xTMT6plex [N-Term]; 1xIA-DTB [C8]	Q86SX6	GLRX5_C67	2782.49	114.2	96.4	125.9	114.2	74.5	74.8
[K].IITLDTATEIEGLSTGCK.[V]	1xTMT6plex [K18]; 1xTMT6plex [N-Term]; 1xIA-DTB [C17]	Q86T24	KAISO_C431	2832.58	102.8	110.9	96.1	96.3	94.6	99.2
[K].CLSIMLAEWEANPLICPVCTK.[Y]	2xCarbamidomethyl [C16; C19]; 1xTMT6plex [K21]; 1xTMT6plex [N-Term]; 1xIA-DTB [C1]	Q86UA6	RIP_C122	3415.8	62.5	119.2	119.3	90.6	94.8	113.6
[K].SKLPILIFPEGTCINNTSVMMFK.[K]	2xTMT6plex [K2; K23]; 1xTMT6plex [N-Term]; 1xIA-DTB [C13]	Q86UL3	GPAT4_C325	3780.12	140.4	186.1	81.9	69.1	52.5	70
[K].AKECMAGTSGSEEVK.[V]	2xTMT6plex [K2; K15]; 1xTMT6plex [N-Term]; 1xIA-DTB [C4]	Q86UP2	KTN1_C1105	2723.47	108.1	92.2	107.1	97.6	100.6	94.4
[K].ECMAGTSGSEEVK.[V]	1xOxidation [M3]; 1xTMT6plex [K13]; 1xTMT6plex [N-Term]; 1xIA-DTB [C2]	Q86UP2	KTN1_C1105	2311.17	88.8	107.3	100	116.6	97.1	90.3
[R].LNQPYCGYAVGGSGVSATPAQR.[D]	1xTMT6plex [N-Term]; 1xIA-DTB [C6]	Q86UT6	NLRX1_C331	2934.51	105.2	129.4	111.6	88.8	75	90
[R].LLSLPCTLNLQLMR.[F]	1xTMT6plex [N-Term]; 1xIA-DTB [C6]	Q86UV5	UBP48_C290	2353.37	97.9	113.2	101.6	102.7	89	95.6
[R].IWLEPCIR.[G]	1xTMT6plex [N-Term]; 1xIA-DTB [C6]	Q86UV5	UBP48_C39	1768.01	104.5	137.8	93.5	94.8	84.2	85.3
[K].ILSDDCATLGTLGVIPESVILLK.[A]	1xTMT6plex [K23]; 1xTMT6plex [N-Term]; 1xIA-DTB [C6]	Q86UV5	UBP48_C986	3337.94	114	118.7	88.5	93.2	93.3	92.3
[K].VPSPLTCLAHTR.[T]	1xTMT6plex [N-Term]; 1xIA-DTB [C7]	Q86V97	KBTB6_C375	2033.15	132.9	75.6	111	88.5	89.6	102.4
[K].QTRPVQSWLCDPDAMEQGETPLTMLQSQVPNIVK.[A]	1xOxidation [M15]; 1xTMT6plex [K34]; 1xTMT6plex [N-Term]; 1xIA-DTB [C10]	Q86VP6	CAND1_C413	4823.49	64.5	101.6	128.6	92.9	91.7	120.6
[K].QTRPVQSWLCDPDAMEQGETPLTMLQSQVPNIVK.[A]	1xTMT6plex [K34]; 1xTMT6plex [N-Term]; 1xIA-DTB [C10]	Q86VP6	CAND1_C413	4807.5	79	93.1	134.3	95.1	83.9	114.7
[R].LHMTIFSQSVSPCGK.[F]	1xTMT6plex [K15]; 1xTMT6plex [N-Term]; 1xIA-DTB [C13]	Q86W42	THOC6_C35	2602.42	61	153.7	116.2	149.8	77.3	42
[K].LPGNISSLNVECR.[N]	1xTMT6plex [N-Term]; 1xIA-DTB [C12]	Q86W56	PARG_C397	2140.17	105.6	112.4	96.9	98.3	92.5	94.3
[K].IALCLPNICTQPIPLLK.[Q]	1xCarbamidomethyl [C9]; 1xTMT6plex [K17]; 1xTMT6plex [N-Term]; 1xIA-DTB [C4]	Q86W56	PARG_C603	2874.71	90.7	102.1	113.8	97.9	88.3	107.2
[K].YGWVTVECDMLK.[C]	1xTMT6plex [K12]; 1xTMT6plex [N-Term]; 1xIA-DTB [C8]	Q86WB0	ZC3C1_C112	2411.29	85.1	84.1	118.6	109.2	96.2	106.8
[R].DWCPWVNITLGK.[E]	1xTMT6plex [K12]; 1xTMT6plex [N-Term]; 1xIA-DTB [C3]	Q86WB0	ZC3C1_C429	2399.33	101.6	98.2	79.1	89.3	116.2	115.6
[K].FQEQFLNVSGMPQELNQYPCLK.[H]	1xTMT6plex [K22]; 1xTMT6plex [N-Term]; 1xIA-DTB [C20]	Q86X10	RLGPB_C327	3580.87	74.5	99.5	107.7	95.6	92.2	130.5
[R].GICDYFPSPSK.[T]	1xTMT6plex [K11]; 1xTMT6plex [N-Term]; 1xIA-DTB [C3]	Q86XL3	ANKL2_C254	2181.18	135.8	109	90.1	88.1	84	93
[R].YLIGSGDNPTIVQEGCR.[Y]	1xTMT6plex [N-Term]; 1xIA-DTB [C16]	Q86XL3	ANKL2_C350	2560.34	83.4	96.2	114.1	98.4	87.9	120
[R].ATFSFCVSPLLVFVNSK.[S]	1xTMT6plex [K17]; 1xTMT6plex [N-Term]; 1xIA-DTB [C6]	Q86XP1	DGKH_C329	2826.6	102.8	99.7	106	106.2	85.4	99.8
[K].SNNEIILVLQHFDNCVDK.[T]	1xTMT6plex [K18]; 1xTMT6plex [N-Term]; 1xIA-DTB [C15]	Q86XZ4	SPAS2_C61	3068.66	94.3	94.2	102.1	111.9	98.8	98.8
[R].AGDELAYNSSSACASSR.[G]	1xTMT6plex [N-Term]; 1xIA-DTB [C13]	Q86Y37	CACL1_C362	2427.18	89.7	96.6	108.9	100.6	99.6	104.7
[K].SCDAAAAVAK.[A]	1xTMT6plex [K10]; 1xTMT6plex [N-Term]; 1xIA-DTB [C2]	Q86Y37	CACL1_C94	1874.06	66	110.7	116.7	108.6	115.4	82.6
[R].AVASVVGGWLLCLR.[D]	1xTMT6plex [N-Term]; 1xIA-DTB [C12]	Q86Y56	DAAF5_C275	2182.27	112.2	87.7	95.1	101.4	97.6	106
[K].ILPALCHDITDWVVGTR.[V]	1xTMT6plex [N-Term]; 1xIA-DTB [C6]	Q86Y56	DAAF5_C365	2647.46	97.9	83.1	92.8	105.9	102.9	117.4
[K].AQETMDSLAMVEGVSSCQDLYR.[K]	1xTMT6plex [N-Term]; 1xIA-DTB [C17]	Q86Y56	DAAF5_C555	3171.53	105.8	82.8	117.5	92.8	99	102
[R].APSSDEECFFDLLTK.[F]	1xTMT6plex [K15]; 1xTMT6plex [N-Term]; 1xIA-DTB [C8]	Q86YR5	GPSM1_C497	2669.39	125.5	93.8	106.5	77.7	90.4	106.1
[R].SAPPCANSTVGVVK.[M]	1xTMT6plex [K14]; 1xTMT6plex [N-Term]; 1xIA-DTB [C5]	Q86YS7	C2CD5_C867	2297.31	96.4	112.8	104.6	98.7	92.4	95
[R].LLSALGLFCVGWEAPQGVELPSAK.[D]	1xTMT6plex [K24]; 1xTMT6plex [N-Term]; 1xIA-DTB [C9]	Q86YV9	HPS6_C385	3452.94	96.9	99.6	112.5	105.1	74.3	111.6
[R].SFREPAPAEALPQQYPEPAPAALCGPPPR.[A]	1xTMT6plex [N-Term]; 1xIA-DTB [C24]	Q8IU81	I2BP1_C363	3795.98	80.3	101.8	99.7	111.8	100.9	105.5
[K].ENSTLNCASFTAGIVEAVLTHSGFPAK.[V]	1xTMT6plex [K27]; 1xTMT6plex [N-Term]; 1xIA-DTB [C7]	Q8IUR0	TPPC5_C139	3731.98	99.1	103.7	97.8	84.7	95.3	119.4
[R].AIHTFDLQTLPVDFVECLMR.[F]	1xTMT6plex [N-Term]; 1xIA-DTB [C17]	Q8IVF7	FMNL3_C680	3086.64	89.7	97	121	96.2	76.7	119.5
[R].RMPGQCSVLLFPGQGSQVVGMGR.[G]	1xOxidation [M21]; 1xTMT6plex [N-Term]; 1xIA-DTB [C6]	Q8IVS2	FABD_C62	3158.66	86.7	105.3	101.4	104.8	100.2	101.5
[K].AGLLPCPEPTIISAILK.[D]	1xTMT6plex [K17]; 1xTMT6plex [N-Term]; 1xIA-DTB [C6]	Q8IW35	CEP97_C484	2703.62	135.9	88.2	93.9	95	93.4	93.6
[K].AAFGCFGNWLATVEQR.[Q]	1xTMT6plex [N-Term]; 1xIA-DTB [C5]	Q8IWA0	WDR75_C397	2508.3	110.1	115.4	83.6	80.7	109.2	101
[R].LSSYTECYK.[W]	1xTMT6plex [K9]; 1xTMT6plex [N-Term]; 1xIA-DTB [C7]	Q8IWC1	MA7D3_C494	2061.11	107.4	124.8	94	80.5	82.8	110.5
[K].WSSSPENACGLPSPISTNR.[Q]	1xTMT6plex [N-Term]; 1xIA-DTB [C9]	Q8IWC1	MA7D3_C505	2741.39	115.4	116.4	82.8	91.1	91.6	102.8
[K].VLEDCNIVLSLNASNCK.[A]	1xCarbamidomethyl [C5]; 1xTMT6plex [K17]; 1xTMT6plex [N-Term]; 1xIA-DTB [C16]	Q8IWR0	Z3H7A_C123	2859.55	104.1	93.2	115.2	91.7	97.6	98.3
[R].ILSDEDKPLFGPLPCR.[L]	1xTMT6plex [K7]; 1xTMT6plex [N-Term]; 1xIA-DTB [C15]	Q8IWV8	UBR2_C1360	2767.56	91.3	100.1	107.7	94.7	98.5	107.7
[K].VVVPIYCTSFLAVEEDKQQK.[I]	2xTMT6plex [K17; K20]; 1xTMT6plex [N-Term]; 1xIA-DTB [C7]	Q8IWX8	CHERP_C246	3492.97	83.2	97.7	117	100.6	98	103.4
[K].LALEQQQLICK.[Q]	1xTMT6plex [K11]; 1xTMT6plex [N-Term]; 1xIA-DTB [C10]	Q8IWX8	CHERP_C69	2254.34	102	101.2	97.3	99.4	106.5	93.6
[K].QLFACVPK.[T]	1xTMT6plex [K8]; 1xTMT6plex [N-Term]; 1xIA-DTB [C5]	Q8IWZ3	ANKH1_C1965	1873.11	92.3	128.5	90.1	93	95.2	100.9
[K].AWLVSSGCPLQVK.[K]	1xTMT6plex [K13]; 1xTMT6plex [N-Term]; 1xIA-DTB [C8]	Q8IX01	SUGP2_C540	2355.36	107.2	102	106.6	96.4	92.3	95.5
[R].GADQKPTSADCAVR.[A]	1xTMT6plex [K5]; 1xTMT6plex [N-Term]; 1xIA-DTB [C11]	Q8IX01	SUGP2_C656	2386.29	98.1	88	113.3	99.7	92	108.8
[K].SEGSTPADGLPGEAAEDDLAGAPALSQASSGTCFPR.[K]	1xTMT6plex [N-Term]; 1xIA-DTB [C33]	Q8IX01	SUGP2_C947	4171.01	91.1	100.7	106.3	110.9	88.2	102.7
[R].VCLIQEPK.[V]	1xTMT6plex [K8]; 1xTMT6plex [N-Term]; 1xIA-DTB [C2]	Q8IX01	SUGP2_C970	1897.13	99.5	106.6	96.9	98.5	97.8	100.7
[K].RVCLIQEPK.[V]	1xTMT6plex [K9]; 1xTMT6plex [N-Term]; 1xIA-DTB [C3]	Q8IX01	SUGP2_C970	2053.24	93.4	108.1	95.4	102.6	105.4	95
[K].LISDAGYQGEITSVSTACQQLEVFSR.[V]	1xTMT6plex [N-Term]; 1xIA-DTB [C18]	Q8IXH7	NELFD_C195	3540.82	93	93.9	121.8	98.3	82.5	110.4
[K].ADLPEGVAVSGPSPAEFCR.[K]	1xTMT6plex [N-Term]; 1xIA-DTB [C18]	Q8IXI1	MIRO2_C543	2640.37	89	90.5	97.9	70.6	122.9	128.9
[K].AVLHPTGPLYCPEEK.[E]	1xTMT6plex [K15]; 1xTMT6plex [N-Term]; 1xIA-DTB [C11]	Q8IXI2	MIRO1_C175	2621.45	139	79	95.4	89.7	89.2	107.7
[R].CVVEEWLSEFK.[A]	1xTMT6plex [K11]; 1xTMT6plex [N-Term]; 1xIA-DTB [C1]	Q8IXS8	HYCC2_C7	2336.27	79.9	97.3	107.9	100.5	92.5	121.9
[K].FASCVDASGGLK.[C]	1xTMT6plex [K12]; 1xTMT6plex [N-Term]; 1xIA-DTB [C4]	Q8IXT5	RB12B_C204	2122.17	80.7	103.5	114.3	104.9	94	102.6
[R].SVSSSVQVCPEVGKR.[N]	1xTMT6plex [K14]; 1xTMT6plex [N-Term]; 1xIA-DTB [C9]	Q8IXW5	RPAP2_C358	2529.42	93.2	105.6	98.6	94.3	95.5	112.7
[R].ASCFTGLNPTIVQEYTK.[R]	1xTMT6plex [K17]; 1xTMT6plex [N-Term]; 1xIA-DTB [C3]	Q8IY18	SMC5_C881	2839.54	102.1	102	88.5	107.2	107.7	92.4
[R].SCLLSSPGTMLK.[T]	1xTMT6plex [K12]; 1xTMT6plex [N-Term]; 1xIA-DTB [C2]	Q8IY37	DHX37_C1083	2204.25	72.3	108.8	112	101.5	90	115.3
[R].TVNCFYWFDAQQNTWFPK.[T]	1xTMT6plex [K18]; 1xTMT6plex [N-Term]; 1xIA-DTB [C4]	Q8IY47	KBTB2_C349	3262.65	90.1	105.4	104.5	100.1	90.4	109.5
[R].ALLDLCAAPGGWLQVAAK.[F]	1xTMT6plex [K18]; 1xTMT6plex [N-Term]; 1xIA-DTB [C6]	Q8IY81	SPB1_C52	2764.59	119.5	94.3	89.5	112.1	101.8	82.8
[K].QQLPQTPPSCLK.[T]	1xTMT6plex [K12]; 1xTMT6plex [N-Term]; 1xIA-DTB [C10]	Q8IY81	SPB1_C577	2307.33	83.7	100.1	98.2	114.4	105.4	98.2
[R].IVDWKEDCNFALGQLAK.[S]	2xTMT6plex [K5; K17]; 1xTMT6plex [N-Term]; 1xIA-DTB [C8]	Q8IYB7	DI3L2_C312	3146.76	87.1	100.5	124.2	96.7	86.2	105.4
[R].LGEMIETAYGENFACSK.[I]	1xTMT6plex [K17]; 1xTMT6plex [N-Term]; 1xIA-DTB [C15]	Q8IYQ7	THNS1_C324	2830.45	105.7	112.9	119.2	96.9	70.5	94.8
[K].KDIEDTLSGIQTAGCGSTFFR.[D]	1xTMT6plex [K1]; 1xTMT6plex [N-Term]; 1xIA-DTB [C15]	Q8IYU8	MICU2_C144	3213.7	97	103.8	96.9	96.7	98.2	107.4
[K].DIEDTLSGIQTAGCGSTFFR.[D]	1xTMT6plex [N-Term]; 1xIA-DTB [C14]	Q8IYU8	MICU2_C144	2856.44	107.4	98.3	97.1	97.8	95.7	103.8
[K].LVKPCALEIAQIVLGPDAQK.[K]	2xTMT6plex [K3; K20]; 1xTMT6plex [N-Term]; 1xIA-DTB [C5]	Q8IZ13	ZBED8_C119	3302.98	117.6	118.8	103.2	96.2	75.1	89
[R].VIGVELCPEAVEDAR.[V]	1xTMT6plex [N-Term]; 1xIA-DTB [C7]	Q8IZ69	TRM2A_C463	2338.26	88.2	94.2	122.3	96	90.5	108.7
[R].LLAENEDVVVVDKPSSIPVHPCGR.[F]	1xTMT6plex [K13]; 1xTMT6plex [N-Term]; 1xIA-DTB [C22]	Q8IZ73	RUSD2_C246	3540.96	122.3	88.2	91.2	91	94.8	112.6
[K].GLLLDCNVALTLKV.[-]	1xTMT6plex [K13]; 1xTMT6plex [N-Term]; 1xIA-DTB [C6]	Q8IZ81	ELMD2_C285	2439.48	107.2	87.7	113.8	99.5	86.5	105.4
[K].GLLLDCNVALTLK.[V]	1xTMT6plex [K13]; 1xTMT6plex [N-Term]; 1xIA-DTB [C6]	Q8IZ81	ELMD2_C285	2340.41	120.8	88.3	106.4	100.8	93.5	90.1
[R].VIFSIPCEPNLDALIQNQHK.[Y]	1xTMT6plex [K20]; 1xTMT6plex [N-Term]; 1xIA-DTB [C7]	Q8IZH2	XRN1_C893	3246.81	96.4	97.1	118.6	95.1	88.8	103.9
[R].KGDSNANSDVCAAALR.[G]	1xTMT6plex [K1]; 1xTMT6plex [N-Term]; 1xIA-DTB [C11]	Q8IZL8	PELP1_C522	2559.37	82.7	99.5	117.8	101.7	92.5	105.7
[R].CPPPLACALQAFSLGQR.[E]	1xCarbamidomethyl [C1]; 1xTMT6plex [N-Term]; 1xIA-DTB [C7]	Q8IZL8	PELP1_C600	2567.38	119.3	76.4	102.8	113.9	82.5	105.1
[R].SAPHLPGLMCLLR.[L]	1xTMT6plex [N-Term]; 1xIA-DTB [C10]	Q8IZL8	PELP1_C71	2146.22	100.5	112.6	113.1	87.9	83.3	102.6
[R].SPFLCFGDVLLGASR.[T]	1xTMT6plex [N-Term]; 1xIA-DTB [C5]	Q8IZT6	ASPM_C51	2320.27	120.2	112.3	70.8	67.8	126.3	102.7
[K].EIEPFLPPLKPDYCVK.[Q]	2xTMT6plex [K10; K16]; 1xTMT6plex [N-Term]; 1xIA-DTB [C14]	Q8IZV5	RDH10_C272	3084.78	91.5	98.5	99.1	91.9	108.1	110.9
[R].ALCDLGPWVK.[C]	1xTMT6plex [K10]; 1xTMT6plex [N-Term]; 1xIA-DTB [C3]	Q8N0U8	VKORL_C50	2069.2	124	72.6	76.1	117.9	126.2	83.1
[K].SPLDGAMVVAASSVQGFSTVWQGLECAAK.[C]	1xOxidation [M7]; 1xTMT6plex [K29]; 1xTMT6plex [N-Term]; 1xIA-DTB [C26]	Q8N0X7	SPART_C558	3893.03	128.3	109.6	85.2	87.9	91.1	97.9
[K].GLQSSQGLTGFTLSLVSSLCR.[L]	1xTMT6plex [N-Term]; 1xIA-DTB [C20]	Q8N0Z3	SPICE_C377	2892.58	112.1	95.1	90	97	113.7	92
[KR].TIWDGEETVYCFK.[E]	1xTMT6plex [K13]; 1xTMT6plex [N-Term]; 1xIA-DTB [C11]	Q8N196	SIX5_C207	2558.34	95.9	99.5	108.2	105.7	91.4	99.3
[K].SSGQSAQLLSHEPGDPPCLR.[R]	1xTMT6plex [N-Term]; 1xIA-DTB [C18]	Q8N1F7	NUP93_C522	2817.45	102.1	88.5	120.6	92.5	98.8	97.5
[K].GEGAITSSAITTVAAEAPVLPLSTEPPAAPATSAYTCFR.[C]	1xTMT6plex [N-Term]; 1xIA-DTB [C37]	Q8N1G0	ZN687_C672	4557.37	136.5	96.7	103	80.5	92.7	90.7
[R].SQDGDTAACSLIQAR.[L]	1xTMT6plex [N-Term]; 1xIA-DTB [C9]	Q8N201	INT1_C1755	2274.17	84.9	100.4	111.7	94.6	110.3	98.1
[R].GSLPEQPCTK.[K]	1xTMT6plex [K10]; 1xTMT6plex [N-Term]; 1xIA-DTB [C8]	Q8N371	KDM8_C164	2027.14	134.6	88.2	95.3	99.4	96	86.5
[R].HPPHTELLDLQPLPITALGCK.[A]	1xTMT6plex [K21]; 1xTMT6plex [N-Term]; 1xIA-DTB [C20]	Q8N3C0	ASCC3_C1315	3260.86	101.1	114.8	111	83.9	101.9	87.3
[R].AMLPCPDYDTDTK.[T]	1xTMT6plex [K13]; 1xTMT6plex [N-Term]; 1xIA-DTB [C5]	Q8N3C0	ASCC3_C1906	2437.25	106.3	90.6	119.4	89.9	84.5	109.2
[K].ILGENAKPNYGCQVTIQSEQEK.[Q]	2xTMT6plex [K7; K22]; 1xTMT6plex [N-Term]; 1xIA-DTB [C12]	Q8N3C0	ASCC3_C324	3645.99	95	113	107.7	90.9	87.3	106.2
[R].GSSGPQPAKPCSGATPTPLLLVGDR.[S]	1xTMT6plex [K9]; 1xTMT6plex [N-Term]; 1xIA-DTB [C11]	Q8N3F8	MILK1_C597	3373.87	130	86.2	85.5	116.8	105.4	76.2
[K].AHFDYDPSDDPYVPCR.[E]	1xTMT6plex [N-Term]; 1xIA-DTB [C15]	Q8N3R9	PALS1_C366	2635.24	61.6	117	110.7	112.6	107.1	91
[R].AICIEEIGIWMK.[M]	1xTMT6plex [K12]; 1xTMT6plex [N-Term]; 1xIA-DTB [C3]	Q8N3U4	STAG2_C308	2373.34	133.7	89.1	83	107.5	108.9	77.8
[R].GVAPGPGFPSLEELCLASSTCNFVSNEVLGR.[L]	1xCarbamidomethyl [C15]; 1xTMT6plex [N-Term]; 1xIA-DTB [C21]	Q8N531	FBXL6_C368	3946	158.3	122.3	100.7	83.5	56.7	78.5
[K].CAAQPHTVR.[R]	1xTMT6plex [N-Term]; 1xIA-DTB [C1]	Q8N5C6	SRBD1_C120	1720.95	85.8	111.1	91.6	113.6	103.6	94.3
[K].ASNLEGESNSSETPSTSTVWGGTCK.[K]	1xTMT6plex [K25]; 1xTMT6plex [N-Term]; 1xIA-DTB [C24]	Q8N5C6	SRBD1_C165	3496.73	103.7	95.9	86.9	99.4	115.8	98.3
[K].LAIISPTSQILHTDVVYLHCGQGFR.[E]	1xTMT6plex [N-Term]; 1xIA-DTB [C20]	Q8N5C6	SRBD1_C571	3506.91	147.6	75.7	98.3	86.1	85.2	107
[R].SIVCLEDLQIGTVLTGK.[V]	1xTMT6plex [K17]; 1xTMT6plex [N-Term]; 1xIA-DTB [C4]	Q8N5C6	SRBD1_C912	2756.6	102.8	88.3	105.6	102.4	96.6	104.3
[R].RGEIGLTSEEIASFECSGYVMSGSR.[H]	1xTMT6plex [N-Term]; 1xIA-DTB [C16]	Q8N5F7	NKAP_C349	3403.68	78.1	105.8	119.8	95	86.1	115.2
[K].VVNEINIEDLCLTK.[A]	1xTMT6plex [K14]; 1xTMT6plex [N-Term]; 1xIA-DTB [C11]	Q8N5K1	CISD2_C92	2570.46	99.1	104.7	95.7	102.5	101.6	96.4
[K].AVYTTTLDYNCR.[K]	1xTMT6plex [N-Term]; 1xIA-DTB [C11]	Q8N5W9	RFLB_C186	2158.12	123.1	104.2	82.3	95.3	98.5	96.6
[R].QHGCTANDANTK.[Y]	1xTMT6plex [K12]; 1xTMT6plex [N-Term]; 1xIA-DTB [C4]	Q8N6H7	ARFG2_C97	2227.17	44.6	129.5	105	101.6	135.2	84.1
[K].AFSPGLPPQSCSLNLK.[Q]	1xTMT6plex [K16]; 1xTMT6plex [N-Term]; 1xIA-DTB [C11]	Q8N6M3	FITM2_C251	2626.48	106	99.4	84	102.9	109.6	98.2
[K].FRPVPGSALQIFELCAQEQR.[K]	1xTMT6plex [N-Term]; 1xIA-DTB [C15]	Q8N6R0	EFNMT_C226	3027.64	86.8	105	119.7	102.3	86.8	99.4
[R].KSPSSDSWTCADTSTER.[R]	1xTMT6plex [K1]; 1xTMT6plex [N-Term]; 1xIA-DTB [C10]	Q8N6T3	ARFG1_C351	2825.41	101.2	99	100.9	108.9	91.3	98.7
[R].CPGGLPGHAGGAAPGR.[G]	1xTMT6plex [N-Term]; 1xIA-DTB [C1]	Q8N726	ARF_C100	2113.13	105.7	118.9	64.3	63.3	131.4	116.2
[K].MWINPCAQVIFDSDPAPK.[D]	1xTMT6plex [K18]; 1xTMT6plex [N-Term]; 1xIA-DTB [C6]	Q8N7H5	PAF1_C218	2999.59	98.7	118.6	91.4	85.1	99.8	106.4
[K].YCNSLPDIPFDPK.[F]	1xTMT6plex [K13]; 1xTMT6plex [N-Term]; 1xIA-DTB [C2]	Q8N7H5	PAF1_C36	2476.33	92.1	108.8	93.8	98.9	98.5	107.9
[R].VKYCNSLPDIPFDPK.[F]	2xTMT6plex [K2; K15]; 1xTMT6plex [N-Term]; 1xIA-DTB [C4]	Q8N7H5	PAF1_C36	2932.66	85.8	112.1	108.9	90.6	89.7	112.9
[R].VVAAAFQSEDPADPCALLQR.[R]	1xTMT6plex [N-Term]; 1xIA-DTB [C15]	Q8N8A6	DDX51_C402	2839.5	85.1	99	119.8	102.7	88.5	104.9
[K].EFFWNVEEDFKPAPECWIPAK.[E]	2xTMT6plex [K11; K21]; 1xTMT6plex [N-Term]; 1xIA-DTB [C16]	Q8N999	CL029_C117	3778.99	101.2	85	110.5	114.2	95.8	93.3
[K].CLFNHFLK.[I]	1xTMT6plex [K8]; 1xTMT6plex [N-Term]; 1xIA-DTB [C1]	Q8N999	CL029_C302	1989.15	83.7	112.6	108.7	95.5	92	107.5
[K].QHSPIQVPMVAGSPLGATQTCNK.[V]	1xTMT6plex [K23]; 1xTMT6plex [N-Term]; 1xIA-DTB [C21]	Q8N9N5	BANP_C108	3331.8	56.8	152	87	112.1	113.9	78.3
[K].SLCREEAETPAEATGKPQR.[D]	1xTMT6plex [K16]; 1xTMT6plex [N-Term]; 1xIA-DTB [C3]	Q8N9T8	KRI1_C591	3040.63	66.8	100	117.5	111	92.2	112.5
[K].TVNIWQFDLETLCQAR.[R]	1xTMT6plex [N-Term]; 1xIA-DTB [C13]	Q8N9V3	WSDU1_C316	2675.42	74	113	111.1	113.5	86	102.5
[R].FVGGVYGGNIKPTPFLCLTLK.[M]	2xTMT6plex [K11; K21]; 1xTMT6plex [N-Term]; 1xIA-DTB [C17]	Q8NAV1	PR38A_C72	3421	86.7	92.5	111.5	107.6	109.7	92
[K].LILNQSAWTSQSNSLASCLSR.[L]	1xTMT6plex [N-Term]; 1xIA-DTB [C18]	Q8NB14	UBP38_C432	3017.6	103.6	116.2	94.6	89.9	90.2	105.4
[R].SWVFDSYSLTGPSVCELVR.[A]	1xTMT6plex [N-Term]; 1xIA-DTB [C15]	Q8NB37	GALD1_C154	2883.49	96.3	91.6	122.2	102	84	103.9
[R].GAVTGCEDCLAALLDHDAFVLCR.[D]	2xCarbamidomethyl [C9; C22]; 1xTMT6plex [N-Term]; 1xIA-DTB [C6]	Q8NB46	ANR52_C733	3244.61	110.5	105.1	104.1	76.7	94.3	109.4
[K].ECVQIITAVTSLSPLLTFSK.[F]	1xTMT6plex [K20]; 1xTMT6plex [N-Term]; 1xIA-DTB [C2]	Q8NB91	FANCB_C574	3117.8	105	95.2	92.4	118	98.5	90.9
[R].CLSTLECAAVALSILEK.[N]	1xCarbamidomethyl [C7]; 1xTMT6plex [K17]; 1xTMT6plex [N-Term]; 1xIA-DTB [C1]	Q8NBA8	DTWD2_C220	2788.57	84.6	130.3	118.5	101.6	78.8	86.2
[K].AILFSQPLQITDTQQGCIAPVELR.[Y]	1xTMT6plex [N-Term]; 1xIA-DTB [C17]	Q8NBF2	NHLC2_C716	3379.86	116.3	82.3	110.6	101	93.1	96.7
[K].FFAPWCGHCK.[A]	1xCarbamidomethyl [C9]; 1xTMT6plex [K10]; 1xTMT6plex [N-Term]; 1xIA-DTB [C6]	Q8NBS9	TXND5_C217	2220.16	87.7	125.8	92	88	98.3	108.1
[K].DAAFQNVLTHVCLD.[-]	1xTMT6plex [N-Term]; 1xIA-DTB [C12]	Q8NBU5	ATAD1_C359	2284.2	88.1	95.2	118	99.6	91.1	108
[K].SKDAAFQNVLTHVCLD.[-]	1xTMT6plex [K2]; 1xTMT6plex [N-Term]; 1xIA-DTB [C14]	Q8NBU5	ATAD1_C359	2728.49	62.3	98	126.8	106.5	98.9	107.5
[K].FPICNPTPYR.[M]	1xTMT6plex [N-Term]; 1xIA-DTB [C4]	Q8NC60	NOA1_C393	1946.05	83.1	108.7	111.1	100.3	88.1	108.7
[K].ENCILNLLTEKEVNIVLPTQSIVPR.[T]	1xTMT6plex [K11]; 1xTMT6plex [N-Term]; 1xIA-DTB [C3]	Q8NC60	NOA1_C505	3803.19	79.8	90.7	124	86.7	89.1	129.7
[K].ENCILNLLTEK.[E]	1xTMT6plex [K11]; 1xTMT6plex [N-Term]; 1xIA-DTB [C3]	Q8NC60	NOA1_C505	2257.3	94.3	101.9	106.2	100	88.9	108.7
[R].MLCVNAPPK.[K]	1xTMT6plex [K9]; 1xTMT6plex [N-Term]; 1xIA-DTB [C3]	Q8NCA5	FA98A_C126	1940.12	88.7	95.7	112.2	108.6	98.9	96
[K].GICIALGMSKPPANITMFQFFSGIEK.[K]	2xTMT6plex [K10; K26]; 1xTMT6plex [N-Term]; 1xIA-DTB [C3]	Q8NCA5	FA98A_C150	3997.21	103.1	87.9	123.8	91.2	93	101.1
[R].VTPLPSLASPAVPAPGYCSR.[I]	1xTMT6plex [N-Term]; 1xIA-DTB [C18]	Q8NCD3	HJURP_C194	2721.5	120.1	111.5	98.2	81.4	91.3	97.5
[R].YADFTLLSIPYPGCEFFK.[E]	1xTMT6plex [K18]; 1xTMT6plex [N-Term]; 1xIA-DTB [C14]	Q8NCE2	MTMRE_C252	3078.64	87.5	97.5	128.7	89.2	89.5	107.7
[R].SCLSPKPPQGQEQQGQEDEVVLVEGPTLPETPR.[L]	1xTMT6plex [K6]; 1xTMT6plex [N-Term]; 1xIA-DTB [C2]	Q8NCF5	NF2IP_C232	4540.38	87	112.6	97.6	89.2	95.2	118.3
[R].VCGTLLEYLGK.[G]	1xTMT6plex [K11]; 1xTMT6plex [N-Term]; 1xIA-DTB [C2]	Q8NCJ5	SPRY3_C229	2163.26	81.2	102.6	108.4	103.5	87	117.4
[K].LFAGINSVCFDEK.[S]	1xTMT6plex [K13]; 1xTMT6plex [N-Term]; 1xIA-DTB [C9]	Q8NCM8	DYHC2_C1465	2410.32	84.5	106.6	107.3	92.1	91.2	118.3
[K].LVYTPLTDKCYLTLTQAMK.[M]	2xTMT6plex [K9; K19]; 1xTMT6plex [N-Term]; 1xIA-DTB [C10]	Q8NCM8	DYHC2_C1671	3398.94	94.2	112.4	87.8	88.2	101.2	116.2
[R].VCPFLIDPSSQATEWLK.[T]	1xTMT6plex [K17]; 1xTMT6plex [N-Term]; 1xIA-DTB [C2]	Q8NCM8	DYHC2_C3277	2901.59	88.5	115.4	89.7	90.2	98.2	117.9
[K].STSTSEPTTGCSLK.[-]	1xTMT6plex [K14]; 1xTMT6plex [N-Term]; 1xIA-DTB [C11]	Q8ND82	Z280C_C734	2366.26	82.5	100.5	102.8	108.6	100.2	105.3
[R].HCAPSGTPTGPEILAAAVPPSSLK.[N]	1xTMT6plex [K24]; 1xTMT6plex [N-Term]; 1xIA-DTB [C2]	Q8NDD1	CA131_C100	3268.81	102.8	97.2	97.7	89.2	102.5	110.5
[K].HNTNTATPFCNR.[Q]	1xTMT6plex [N-Term]; 1xIA-DTB [C10]	Q8NDI1	EHBP1_C849	2114.08	129.2	97	88.2	101.4	99.6	84.6
[R].ASPLPPPPPPPGAEPACPGSSAAAPEYK.[T]	1xTMT6plex [K28]; 1xTMT6plex [N-Term]; 1xIA-DTB [C17]	Q8NDT2	RB15B_C128	3620.92	112.8	78.3	116.6	106.1	89.4	96.8
[K].GPVGSGSSGINIQCSTIGQMPNNQSINSK.[V]	1xTMT6plex [K29]; 1xTMT6plex [N-Term]; 1xIA-DTB [C14]	Q8NDV7	TNR6A_C395	3842.99	125.2	99.4	69.5	110.7	104.5	90.7
[R].ALSIPPNIDVLLCEQEVVADETPAVQAVLR.[A]	1xTMT6plex [N-Term]; 1xIA-DTB [C13]	Q8NE71	ABCF1_C365	3941.16	98.2	94.6	114.7	86.6	93.1	112.8
[R].FGLESHAHTIQICK.[L]	1xTMT6plex [K14]; 1xTMT6plex [N-Term]; 1xIA-DTB [C13]	Q8NE71	ABCF1_C741	2551.42	114.3	93.9	101	99.7	109.3	81.8
[R].VVLVFGYNCCK.[V]	1xCarbamidomethyl [C9]; 1xTMT6plex [K11]; 1xTMT6plex [N-Term]; 1xIA-DTB [C10]	Q8NEZ5	FBX22_C228	2269.26	106.6	113.9	99.2	98	84.9	97.5
[K].WPQIMIFPEGTCTNR.[T]	1xTMT6plex [N-Term]; 1xIA-DTB [C12]	Q8NF37	PCAT1_C211	2531.31	99.4	98.5	97.2	83.8	116.1	105
[R].LFVATALLPEETETCLFNQEILAK.[D]	1xTMT6plex [K24]; 1xTMT6plex [N-Term]; 1xIA-DTB [C15]	Q8NF91	SYNE1_C6415	3661.03	102.1	95.3	113.3	111.7	75.8	101.8
[R].LHYGTDPCTGQPFR.[F]	1xTMT6plex [N-Term]; 1xIA-DTB [C8]	Q8NFF5	FAD1_C236	2330.19	49.7	129.2	111.8	112.7	111.9	84.7
[R].RTDPYSCSLCPFSPTDPGWPAFMR.[I]	1xCarbamidomethyl [C7]; 1xTMT6plex [N-Term]; 1xIA-DTB [C10]	Q8NFF5	FAD1_C499	3526.69	80.4	112.8	111.1	100.3	81.3	114.1
[R].CALSSPSLAFTPPIK.[T]	1xTMT6plex [K15]; 1xTMT6plex [N-Term]; 1xIA-DTB [C1]	Q8NFH5	NUP35_C255	2499.44	79.1	112.6	98	105.9	104.4	100
[R].LEDGFNVALEPLACR.[Q]	1xTMT6plex [N-Term]; 1xIA-DTB [C14]	Q8NFI3	ENASE_C113	2385.28	86.3	102.6	113.2	94.5	99.8	103.6
[K].ILNSEEWFAAACK.[K]	1xTMT6plex [K13]; 1xTMT6plex [N-Term]; 1xIA-DTB [C12]	Q8NG31	KNL1_C1529	2449.33	117.1	109.3	86.4	84.6	98.1	104.6
[K].GCPTVMAGDFK.[E]	1xTMT6plex [K11]; 1xTMT6plex [N-Term]; 1xIA-DTB [C2]	Q8NHU6	TDRD7_C333	2093.13	135	92.1	89.8	104	92.8	86.2
[K].APASGICFSPVNELLFVTIGLDKR.[I]	1xTMT6plex [K23]; 1xTMT6plex [N-Term]; 1xIA-DTB [C7]	Q8NHV4	NEDD1_C213	3514.99	113	96.8	70.4	103.6	107.9	108.3
[R].LKDALLDHDLALPLCLLMAQQR.[N]	1xTMT6plex [K2]; 1xTMT6plex [N-Term]; 1xIA-DTB [C15]	Q8NI27	THOC2_C743	3457.98	69.7	90.5	130.5	101.1	109.8	98.5
[R].LKDALLDHDLALPLCLLMAQQR.[N]	1xOxidation [M18]; 1xTMT6plex [K2]; 1xTMT6plex [N-Term]; 1xIA-DTB [C15]	Q8NI27	THOC2_C743	3473.97	71.2	94.7	123.1	108.3	91.7	111.1
[R].LVSVNEYCLDNTSLAEAVEILK.[A]	1xTMT6plex [K22]; 1xTMT6plex [N-Term]; 1xIA-DTB [C8]	Q8NI35	INADL_C744	3390.86	92.8	97.4	107.8	96.6	92.2	113.3
[R].SLSPDCGGSIEVMQSFLK.[M]	1xTMT6plex [K18]; 1xTMT6plex [N-Term]; 1xIA-DTB [C6]	Q8NI36	WDR36_C866	2865.53	82.2	98.7	101.7	110.2	106.3	100.8
[R].EREQHIAECMAK.[M]	1xTMT6plex [K12]; 1xTMT6plex [N-Term]; 1xIA-DTB [C9]	Q8TAE8	G45IP_C124	2412.29	93.4	102.7	98.9	88.1	102	114.9
[R].ASGDYDNDCTNPITPLCTQPDQVIK.[G]	1xCarbamidomethyl [C17]; 1xTMT6plex [K25]; 1xTMT6plex [N-Term]; 1xIA-DTB [C9]	Q8TAF3	WDR48_C342	3732.86	99.7	88.5	110.3	108.1	89.6	103.7
[K].LQLCLPVLEMYSK.[L]	1xTMT6plex [K13]; 1xTMT6plex [N-Term]; 1xIA-DTB [C4]	Q8TAG9	EXOC6_C135	2504.44	97	89.6	76.5	97.7	115.2	124
[R].ILQEIESTDTACVGPTLR.[S]	1xTMT6plex [N-Term]; 1xIA-DTB [C12]	Q8TAG9	EXOC6_C28	2684.45	93.3	99.7	121.3	89.6	85.2	110.8
[R].KEEPEGGSRPACGGAGTQGPVQLVK.[E]	2xTMT6plex [K1; K25]; 1xTMT6plex [N-Term]; 1xIA-DTB [C12]	Q8TBB5	KLDC4_C373	3649.01	98	95.1	90.8	108.2	106.6	101.2
[R].VILPGMTACIECTLELYPPQVNFPMCTIASMPR.[L]	2xCarbamidomethyl [C9; C12]; 1xOxidation [M]; 1xTMT6plex [N-Term]; 1xIA-DTB [C26]	Q8TBC4	UBA3_C237	4507.26	133.2	89.2	118.6	66.3	80	112.7
[R].IIPAVASTNAVIAAVCATEVFK.[I]	1xTMT6plex [K22]; 1xTMT6plex [N-Term]; 1xIA-DTB [C16]	Q8TBC4	UBA3_C324	3155.83	127	76.3	71.7	134.4	112	78.5
[K].VLVIGAGGLGCELLK.[N]	1xTMT6plex [K15]; 1xTMT6plex [N-Term]; 1xIA-DTB [C11]	Q8TBC4	UBA3_C82	2409.47	123.2	90.2	82.8	114.5	113.6	75.6
[K].YVVLCESPQDKR.[T]	1xTMT6plex [K11]; 1xTMT6plex [N-Term]; 1xIA-DTB [C5]	Q8TC07	TBC15_C184	2404.34	93.7	89.1	88	115.2	115.7	98.3
[K].CLEPTVALLR.[W]	1xTMT6plex [N-Term]; 1xIA-DTB [C1]	Q8TCG1	CIP2A_C337	1853.09	67.6	109	114	99.2	94.4	115.7
[K].SQIVMLEASAENILQQDFCHAIK.[V]	1xTMT6plex [K23]; 1xTMT6plex [N-Term]; 1xIA-DTB [C19]	Q8TCS8	PNPT1_C242	3555.91	83.9	113.5	110	98.3	91	103.2
[K].KLNSEYSMAETLVGTPYYMSPELCQGVK.[Y]	2xTMT6plex [K1; K28]; 1xTMT6plex [N-Term]; 1xIA-DTB [C24]	Q8TD19	NEK9_C223	4335.27	111.6	111.2	108.8	83.2	75.9	109.3
[R].TFDATNPLNLCVK.[I]	1xTMT6plex [K13]; 1xTMT6plex [N-Term]; 1xIA-DTB [C11]	Q8TD19	NEK9_C260	2403.35	85.3	120.1	103	103.7	101.1	86.9
[R].KLGPGRPLPTFPTSECTSDVEPDTR.[E]	1xTMT6plex [K1]; 1xTMT6plex [N-Term]; 1xIA-DTB [C16]	Q8TDD1	DDX54_C73	3667.95	88.1	105	101.1	92.2	120.3	93.3
[K].LGPGRPLPTFPTSECTSDVEPDTR.[E]	1xTMT6plex [N-Term]; 1xIA-DTB [C15]	Q8TDD1	DDX54_C73	3310.69	98.5	97.9	118.1	78.8	107.8	99
[K].VDCTALRPVLILGPLLDVVK.[E]	1xTMT6plex [K20]; 1xTMT6plex [N-Term]; 1xIA-DTB [C3]	Q8TDM6	DLG5_C1736	3101.89	83.3	109.9	105.4	104.2	93.9	103.4
[R].AACLLDGVPVALKK.[V]	2xTMT6plex [K13; K14]; 1xTMT6plex [N-Term]; 1xIA-DTB [C3]	Q8TDX7	NEK7_C53	2594.6	106.4	95.3	104.2	93.9	92.7	107.5
[R].AACLLDGVPVALK.[K]	1xTMT6plex [K13]; 1xTMT6plex [N-Term]; 1xIA-DTB [C3]	Q8TDX7	NEK7_C53	2237.35	102	89.9	108.8	96.3	94.9	108.2
[R].KFDCELPDISLKDLQFLQSFCPSEVQPFLR.[V]	1xCarbamidomethyl [C21]; 2xTMT6plex [K1; K12]; 1xTMT6plex [N-Term]; 1xIA-DTB [C4]	Q8TDY2	RBCC1_C572	4796.58	93.6	136.9	96.5	84.4	83.4	105.2
[R].VPLLCDFEPLHQHVLALHNLVK.[A]	1xTMT6plex [K22]; 1xTMT6plex [N-Term]; 1xIA-DTB [C5]	Q8TDY2	RBCC1_C603	3503.01	98.5	105.7	110.8	91	89.5	104.5
[R].ILLDAPCSGMGQRPNMACTWSVK.[E]	1xCarbamidomethyl [C7]; 1xTMT6plex [K23]; 1xTMT6plex [N-Term]; 1xIA-DTB [C18]	Q8TEA1	NSUN6_C337	3502.82	91.4	102.6	101.2	95.1	94.4	115.3
[R].SSLLDDTTVTLSLCQLR.[N]	1xTMT6plex [N-Term]; 1xIA-DTB [C14]	Q8TEA7	TBCK_C386	2603.43	86.5	112.6	105.7	103.3	84.3	107.7
[R].GSWTSCSSSSHDNFQSLPNPK.[S]	1xTMT6plex [K21]; 1xTMT6plex [N-Term]; 1xIA-DTB [C6]	Q8TEU7	RPGF6_C1368	3233.61	191.5	80.9	84.9	76.5	78.1	88.1
[R].ILCCLTFLVK.[V]	1xCarbamidomethyl [C4]; 1xTMT6plex [K10]; 1xTMT6plex [N-Term]; 1xIA-DTB [C3]	Q8TEX9	IPO4_C269	2177.3	96.2	98.5	101.3	108.5	99.7	95.7
[K].LCPQLMPMLEEALR.[S]	1xOxidation [M8]; 1xTMT6plex [N-Term]; 1xIA-DTB [C2]	Q8TEX9	IPO4_C350	2398.29	88.6	90	104.8	91.7	104.8	120.1
[R].APAALPALCDLLASAADPQIR.[Q]	1xTMT6plex [N-Term]; 1xIA-DTB [C9]	Q8TEX9	IPO4_C42	2815.57	116.1	73.9	98.3	94.9	109.7	107
[K].ACQSCPSEPNTAALQAALAR.[V]	1xCarbamidomethyl [C2]; 1xTMT6plex [N-Term]; 1xIA-DTB [C5]	Q8TEX9	IPO4_C735	2797.43	91.8	101.8	99.7	94.4	89.1	123.1
[R].ETEHCVSLSLAQLSATIFR.[K]	1xTMT6plex [N-Term]; 1xIA-DTB [C5]	Q8TEX9	IPO4_C95	2843.53	114.6	79.2	109	91.3	97.8	108
[K].AQAISPCVQNFCSALDSK.[L]	1xCarbamidomethyl [C12]; 1xTMT6plex [K18]; 1xTMT6plex [N-Term]; 1xIA-DTB [C7]	Q8WTW3	COG1_C513	2906.53	126.6	112.8	70.6	59.2	100.6	130.2
[R].CAVGLVDAVK.[A]	1xTMT6plex [K10]; 1xTMT6plex [N-Term]; 1xIA-DTB [C1]	Q8WTW3	COG1_C72	1942.16	69.5	105.3	117.5	97.8	101.6	108.3
[K].AVFVLSCLLK.[G]	1xTMT6plex [K10]; 1xTMT6plex [N-Term]; 1xIA-DTB [C7]	Q8WU76	SCFD2_C79	2060.27	118.9	106.9	87.8	87.2	101.5	97.9
[K].STAPVMDLLGLDAPVACSIANSK.[T]	1xTMT6plex [K23]; 1xTMT6plex [N-Term]; 1xIA-DTB [C17]	Q8WU79	SMAP2_C196	3240.77	89.2	102.5	88.4	104.9	114.7	100.3
[R].EMGFGHYEEEESCWEK.[Q]	1xTMT6plex [K16]; 1xTMT6plex [N-Term]; 1xIA-DTB [C13]	Q8WUA2	PPIL4_C426	2957.39	102.8	101.5	103.1	89.5	98.5	104.5
[K].FCPSGAWELPGTPR.[K]	1xTMT6plex [N-Term]; 1xIA-DTB [C2]	Q8WUA4	TF3C2_C476	2256.18	83.3	122.2	117.2	98.2	98.8	80.2
[K].LYPFQCFLAHDQAVR.[T]	1xTMT6plex [N-Term]; 1xIA-DTB [C6]	Q8WUA4	TF3C2_C608	2546.35	96.2	99.6	107.5	95.4	85.6	115.7
[R].ELNVITETQCTLGLTALR.[S]	1xTMT6plex [N-Term]; 1xIA-DTB [C10]	Q8WUB8	PHF10_C134	2713.51	112.6	97.1	95.6	101.7	95	98
[R].SCETSSQDLGFSYYPAENLIEYK.[W]	1xTMT6plex [K23]; 1xTMT6plex [N-Term]; 1xIA-DTB [C2]	Q8WUB8	PHF10_C57	3611.8	107.2	95.5	91.6	110.5	103.2	92.2
[K].QLNLSAMPVLTAPQLIGLYICEENRR.[A]	1xTMT6plex [N-Term]; 1xIA-DTB [C21]	Q8WUM0	NU133_C1037	3681.02	78.7	101.8	100.7	104.9	100	113.9
[K].IVFNAQGDSVLGAGACGGVPIIFSR.[N]	1xTMT6plex [N-Term]; 1xIA-DTB [C16]	Q8WUM0	NU133_C457	3186.73	108	88.2	99.6	91.5	101.6	111.1
[K].HCIMQANAEYHQSILAK.[Q]	1xTMT6plex [K17]; 1xTMT6plex [N-Term]; 1xIA-DTB [C2]	Q8WUM4	PDC6I_C250	2924.56	134.4	87.5	92.6	83.8	95.7	106
[K].FIQQTYPSGGEEQAQYCR.[A]	1xTMT6plex [N-Term]; 1xIA-DTB [C17]	Q8WUM4	PDC6I_C40	2843.4	75.9	93.4	93.4	95.3	116.8	125.1
[K].AVQADGQVKECYQSHR.[D]	1xTMT6plex [K9]; 1xTMT6plex [N-Term]; 1xIA-DTB [C11]	Q8WUM4	PDC6I_C512	2786.48	100.2	81.9	112.8	87.7	92.8	124.5
[K].FPFSENQICLTFTWK.[D]	1xTMT6plex [K15]; 1xTMT6plex [N-Term]; 1xIA-DTB [C9]	Q8WUM4	PDC6I_C90	2828.52	103.1	98.7	106.5	97.4	103.8	90.5
[R].AHTVLAASCAR.[H]	1xTMT6plex [N-Term]; 1xIA-DTB [C9]	Q8WUY1	THEM6_C104	1838.03	42.9	128.8	88.5	126.1	137.9	75.8
[R].ADPGVLAALCEK.[T]	1xTMT6plex [K12]; 1xTMT6plex [N-Term]; 1xIA-DTB [C10]	Q8WVB6	CTF18_C542	2154.24	110.9	92.8	99.5	94.6	98.2	103.9
[K].ALTDAGCNLNPLQYIK.[Q]	1xTMT6plex [K16]; 1xTMT6plex [N-Term]; 1xIA-DTB [C7]	Q8WVM8	SCFD1_C485	2701.51	119.4	77.8	90.2	111.5	107	94.1
[R].EVPGSEAARPEQEPPVAEPVPVCTIFSQR.[A]	1xTMT6plex [N-Term]; 1xIA-DTB [C23]	Q8WVT3	TPC12_C160	3858.01	106.6	82.8	105	102.5	103.1	100.1
[K].NIIQPPSCVLHYYNVPLCVTEETFTK.[L]	1xCarbamidomethyl [C8]; 1xTMT6plex [K26]; 1xTMT6plex [N-Term]; 1xIA-DTB [C18]	Q8WVV9	HNRLL_C464	4033.13	116.9	94.8	117.6	87.1	89	94.6
[R].GLCESVVEADLVEALEK.[F]	1xTMT6plex [K17]; 1xTMT6plex [N-Term]; 1xIA-DTB [C3]	Q8WVV9	HNRLL_C84	2771.53	109.2	91.1	108.2	96	87.4	108
[R].ETDAFVCRPNAALCR.[V]	1xCarbamidomethyl [C7]; 1xTMT6plex [N-Term]; 1xIA-DTB [C14]	Q8WWK9	CKAP2_C674	2461.26	104.7	133.7	87.5	81.7	87.6	104.8
[K].MSPWDMELIPNNAVFPEELGTSVPLTDGECR.[S]	1xTMT6plex [N-Term]; 1xIA-DTB [C30]	Q8WWQ0	PHIP_C1144	4186.05	80.8	116.9	126.3	100	72.5	103.6
[K].GSALAALHCGRPPESPVNYGSPPSIADTLFSR.[K]	1xTMT6plex [N-Term]; 1xIA-DTB [C9]	Q8WWQ0	PHIP_C130	4006.08	106.9	89.2	123	83.8	84.2	113
[K].MPACNIMLLGAQR.[K]	1xTMT6plex [N-Term]; 1xIA-DTB [C4]	Q8WWY3	PRP31_C247	2156.17	104	108.3	101.2	100.3	86.5	99.8
[K].VPGAGTAPKPVSVACTQLAFSGPK.[L]	2xTMT6plex [K9; K24]; 1xTMT6plex [N-Term]; 1xIA-DTB [C15]	Q8WXE0	CSKI2_C1109	3480	103.8	100.6	96.7	99.4	106.7	92.8
[R].FQCVFQVLPK.[C]	1xTMT6plex [K10]; 1xTMT6plex [N-Term]; 1xIA-DTB [C3]	Q8WXE1	ATRIP_C585	2176.27	81.5	120.4	106.6	99.5	88.8	103.2
[K].GLCPSVAEIIEEK.[C]	1xTMT6plex [K13]; 1xTMT6plex [N-Term]; 1xIA-DTB [C3]	Q8WXH0	SYNE2_C5348	2355.34	118.7	87.7	106.7	101.7	90.1	95.1
[K].VLACWATYVENLR.[L]	1xTMT6plex [N-Term]; 1xIA-DTB [C4]	Q8WXH0	SYNE2_C587	2276.24	99	108.2	90	90.7	86.9	125.3
[R].LLDLVVQPVPRPSQCSEFIQQSSMK.[S]	1xTMT6plex [K25]; 1xTMT6plex [N-Term]; 1xIA-DTB [C15]	Q8WYP5	ELYS_C1131	3797.09	83.8	107.6	124.3	92.2	81	111.2
[K].KCAVPVETEWLK.[S]	2xTMT6plex [K1; K12]; 1xTMT6plex [N-Term]; 1xIA-DTB [C2]	Q8WYP5	ELYS_C1261	2599.52	95.4	107.9	100.1	104.1	95.5	97
[truncated: 789 more rows]
