# Supplementary material for: Exploiting the DCAF16–SPIN4 interaction to identify DCAF16 ligands for PROTAC development
Source: Royal Society of Chemistry journal article supplement (doi:10.1039/d4md00681j), 2024-12-06
Supplement: d4md00681j4.xlsx [file d4md00681j4.xlsx]

## Sheet: Summary
TMT tag	Sample
Abundances (Grouped): F1, 126	MDA-MB-231 wildtype
Abundances (Grouped): F1, 127N	MDA-MB-231 wildtype
Abundances (Grouped): F1, 127C	MDA-MB-231 wildtype
Abundances (Grouped): F1, 128N	Not used in the study
Abundances (Grouped): F1, 128C
Abundances (Grouped): F1, 129N	MDA-MB-231 DCAF16 knockout
Abundances (Grouped): F1, 129C	MDA-MB-231 DCAF16 knockout
Abundances (Grouped): F1, 130N	MDA-MB-231 DCAF16 knockout
Abundances (Grouped): F1, 130C	Not used in the study
Abundances (Grouped): F1, 131

## Sheet: Global proteomics MDA-MB-231
Accession	Description	Coverage [%]	# Peptides	# PSMs	# Unique Peptides	# AAs	MW [kDa]	calc. pI	Score Sequest HT: Sequest HT	# Peptides (by Search Engine): Sequest HT	Gene Symbol	Abundances (Grouped): F1, 126	Abundances (Grouped): F1, 127N	Abundances (Grouped): F1, 127C	Abundances (Grouped): F1, 128N	Abundances (Grouped): F1, 128C	Abundances (Grouped): F1, 129N	Abundances (Grouped): F1, 129C	Abundances (Grouped): F1, 130N	Abundances (Grouped): F1, 130C	Abundances (Grouped): F1, 131
A0A0B4J2D5	Putative glutamine amidotransferase-like class 1 domain-containing protein 3B, mitochondrial [OS=Homo sapiens]	26	6	9	6	268	28.1	8.27	11.23	6	GATD3B	106.9	103.5	110.2	105.4	96.2	92.8	95.4	94.1	105.4	90
A0A0B4J2F0	Protein PIGBOS1 [OS=Homo sapiens]	19	1	2	1	54	6.3	8.5	4.44	1	PIGBOS1	43.9	114.6	87.7	107.2	122.4	90.6	121.7	94.4	93.3	124.2
A0A0U1RRE5	Negative regulator of P-body association [OS=Homo sapiens]	25	2	5	2	68	7	9.42	4.03	2	NBDY	97.9	96.6	100.1	107.8	99.8	102.7	89.8	92.7	108.7	103.9
A0A0U1RRL7	Protein MMP24OS [OS=Homo sapiens]	13	1	4	1	71	7.7	4.72	1.91	1	MMP24OS	86.4	111.3	103	102.7	88.7	91.2	95.4	102.5	112.6	106
A0A2R8Y4L2	Heterogeneous nuclear ribonucleoprotein A1-like 3 [OS=Homo sapiens]	64	16	136	1	275	29.2	9.48	295.58	16	HNRNPA1L3	90.4	107.1	97.4	88.3	75.1	113.7	106.7	117.7	108.3	95.1
A0AV96	RNA-binding protein 47 [OS=Homo sapiens]	14	5	6	4	593	64.1	7.68	13.35	5	RBM47	86.6	90.5	89.3	94.8	92.6	105.9	98.9	102.6	115.2	123.4
A0AVT1	Ubiquitin-like modifier-activating enzyme 6 [OS=Homo sapiens]	33	29	100	29	1052	117.9	6.14	242.38	29	UBA6	95.4	96.8	94.7	104.1	103.4	102.5	99.7	101.7	101	100.7
A0FGR8	Extended synaptotagmin-2 [OS=Homo sapiens]	29	20	61	20	921	102.3	9.26	171.07	20	ESYT2	96.9	97.5	99.6	98.2	93.2	100	99.8	100.6	108.9	105.3
A0JLT2	Mediator of RNA polymerase II transcription subunit 19 [OS=Homo sapiens]	14	2	3	2	244	26.3	9.82	5.25	2	MED19	94.8	110.8	103.6	90.3	100.2	106.9	98.6	101.1	98.2	95.4
A0JNW5	UHRF1-binding protein 1-like [OS=Homo sapiens]	6	7	9	7	1464	164.1	6.32	17.54	7	BLTP3B	95.4	99.9	102.9	102.6	112.5	97.6	100.9	98.2	96.8	93.3
A0MZ66	Shootin-1 [OS=Homo sapiens]	26	16	22	16	631	71.6	5.33	49.38	16	SHTN1	94	102.6	103.1	105.7	111.6	94	94.4	92.5	103.1	99
A0PK00	Transmembrane protein 120B [OS=Homo sapiens]	5	1	1	1	339	40.2	8.9	2.79	1	TMEM120B	115.7	103.5	89.2	105.3	125.4	100.5	100.8	69	101.8	88.7
A1A4S6	Rho GTPase-activating protein 10 [OS=Homo sapiens]	2	2	2	2	786	89.3	7.18	4.01	2	ARHGAP10	99.8	99.1	107.9	103	97.2	101.7	112.9	104	85.6	88.8
A1L0T0	2-hydroxyacyl-CoA lyase 2 [OS=Homo sapiens]	22	9	29	9	632	67.8	8.15	85.11	9	ILVBL	110.2	110	106.1	96.7	102.3	93.3	99	93.4	95.9	93.1
A1L188	NADH dehydrogenase [ubiquinone] 1 alpha subcomplex assembly factor 8 [OS=Homo sapiens]	26	2	2	2	74	7.8	9.32	3.64	2	NDUFAF8	120	113.3	104.3	89	79.1	88.5	108.2	87.7	105.1	104.7
A1L390	Pleckstrin homology domain-containing family G member 3 [OS=Homo sapiens]	1	2	2	2	1219	134.3	6.55	0	2	PLEKHG3	112	94.6	101.4	101.4	71.8	94	116.9	102.2	98.5	107.1
A2RRP1	NBAS subunit of NRZ tethering complex [OS=Homo sapiens]	2	5	6	5	2371	268.4	5.96	13.29	5	NBAS	103.7	99.7	109.6	102.1	94.4	86.9	98.3	104.8	103.1	97.2
A3KN83	Protein strawberry notch homolog 1 [OS=Homo sapiens]	9	8	16	8	1393	154.2	7.88	51.06	8	SBNO1	93.1	103.9	105.2	94.5	105	99.7	105.2	97.3	96.6	99.6
A4D161	Protein FAM221A [OS=Homo sapiens]	9	2	2	2	298	33.1	6.74	4.09	2	FAM221A	91.9	115.6	124	99	105.8	89.5	95.6	87.2	92.3	99
A4D1E9	GTP-binding protein 10 [OS=Homo sapiens]	15	5	7	5	387	42.9	9.03	15.5	5	GTPBP10	122	104.1	99.1	84	86.4	106.4	98.7	92.2	95.6	111.4
A4FU01	Myotubularin-related protein 11 [OS=Homo sapiens]	1	1	3	1	709	79.5	7.03	5.91	1	MTMR11	111	113.9	121.7	84.4	103.4	94.2	79.4	87.1	103	101.8
A5A3E0	POTE ankyrin domain family member F [OS=Homo sapiens]	9	11	376	1	1075	121.4	6.2	751.83	11	POTEF	75.3	88.9	92.3	97.8	140.5	107.4	100.6	109.4	97.8	90.1
A5PLN9	Trafficking protein particle complex subunit 13 [OS=Homo sapiens]	16	4	4	4	417	46.5	5.6	8.92	4	TRAPPC13	99.7	91.8	100.6	113.3	114.4	87.6	105.2	99.6	86.2	101.6
A5YKK6	CCR4-NOT transcription complex subunit 1 [OS=Homo sapiens]	16	31	53	31	2376	266.8	7.11	108.11	31	CNOT1	93.3	94.3	98	92.3	90.8	109.8	109	104.6	102.5	105.5
A6H8Y1	Transcription factor TFIIIB component B'' homolog [OS=Homo sapiens]	1	3	5	3	2624	293.7	5.11	6.14	3	BDP1	95	63.2	111	102.4	103.2	97.9	99.4	87.6	121.7	118.6
A6NCM1	IQ and AAA domain-containing protein 1-like [OS=Homo sapiens]	1	1	1	1	818	95	9.16	2.39	1	IQCA1L	89.1	72.5	109	73.9	132.7	103.2	101.8	107.5	106.5	103.9
A6NDG6	Glycerol-3-phosphate phosphatase [OS=Homo sapiens]	38	11	23	11	321	34	6.14	51.22	11	PGP	104.2	100.3	97.4	103.7	105.6	96.7	96.6	94.8	104.7	96.1
A6NDU8	RAB7A-interacting MON1-CCZ1 complex subunit 1 [OS=Homo sapiens]	5	2	2	2	294	33.6	5.26	3.77	2	RIMOC1	107.9	93.4	94.2	110.4	100.8	92.8	99	107.2	87.4	106.9
A6NED2	RCC1 domain-containing protein 1 [OS=Homo sapiens]	6	2	3	2	376	40.1	5.27	8.59	2	RCCD1	98.4	93.6	111.7	116.3	90	99.4	90.9	97.3	95	107.4
A6NHR9	Structural maintenance of chromosomes flexible hinge domain-containing protein 1 [OS=Homo sapiens]	15	25	36	25	2005	226.2	7.3	72.9	25	SMCHD1	98.2	93.2	100.4	91.8	93.9	103.3	106.2	106.3	99.7	107.1
A6NIH7	Protein unc-119 homolog B [OS=Homo sapiens]	11	2	3	2	251	28.1	5.68	6.59	2	UNC119B	135.6	120.3	87.3	113	106.9	69.1	93.6	80.5	76.3	117.5
A6NJ78	12S rRNA N4-methylcytidine (m4C) methyltransferase [OS=Homo sapiens]	3	1	1	1	407	46.1	8.62	4.94	1	METTL15	93	93.6	89.6	85.2	80.4	103.1	109.6	114.7	120.9	109.9
A6NKD9	Coiled-coil domain-containing protein 85C [OS=Homo sapiens]	15	4	5	4	419	45.2	6.96	11.66	4	CCDC85C	108.4	106.8	100.9	98.2	105.9	97.7	96.3	96.2	96.6	93
A7E2V4	Zinc finger SWIM domain-containing protein 8 [OS=Homo sapiens]	2	2	3	2	1837	197.2	6.8	10.82	2	ZSWIM8	107.7	124.1	93	111.7	106.7	92.2	95.2	80.8	97.2	91.4
A8MTY0	Zinc finger protein 724 [OS=Homo sapiens]	15	4	7	2	619	71.1	9.11	10.34	4	ZNF724	101.9	122.4	101.4	89	99.5	103.1	99.3	101.9	88.3	93.1
A8MW92	PHD finger protein 20-like protein 1 [OS=Homo sapiens]	7	6	8	5	1017	114.9	6.83	14.56	6	PHF20L1	102.5	96.5	106.5	97.7	81.1	102.9	101	105.8	102.4	103.6
A8MXV4	Acyl-coenzyme A diphosphatase NUDT19 [OS=Homo sapiens]	10	2	2	2	375	42.2	7.64	4.8	2	NUDT19	101.5	99.8	121.5	93.2	83	96.5	105.5	99.5	107	92.5
B2RTY4	Unconventional myosin-IXa [OS=Homo sapiens]	0	1	1	1	2548	292.5	8.88	1.81	1	MYO9A	75.1	120	104.4	94.1	115.3	107	99.1	108	92.1	84.9
C9JLW8	Mapk-regulated corepressor-interacting protein 1 [OS=Homo sapiens]	69	5	13	5	97	10.9	9.41	25.71	5	MCRIP1	90.6	100	102.9	94.4	95.1	102	98.7	102.5	108.5	105.5
E9PRG8	Uncharacterized protein C11orf98 [OS=Homo sapiens]	45	6	15	6	123	14.2	11.53	16.9	6	C11orf98	105.7	115.9	107.5	94.5	93.1	102.6	102.2	99.1	90.5	89
L0R819	ASNSD1 upstream open reading frame protein [OS=Homo sapiens]	23	2	6	2	96	11.2	8.88	6.02	2	ASDURF	100.7	128.4	92.2	76.1	79.3	108.9	116.4	94.2	87.7	116.2
O00115	Deoxyribonuclease-2-alpha [OS=Homo sapiens]	17	6	10	6	360	39.6	8.05	17.09	6	DNASE2	92.8	97.8	93.3	106.1	102.9	92.4	97.9	96.8	111.7	108.4
O00116	Alkyldihydroxyacetonephosphate synthase, peroxisomal [OS=Homo sapiens]	26	13	22	13	658	72.9	7.34	59.42	13	AGPS	129.7	110.4	113.6	80.2	106.2	94.1	84.7	76.7	102.1	102.4
O00139	Kinesin-like protein KIF2A [OS=Homo sapiens]	20	11	18	9	706	79.9	6.68	47.62	11	KIF2A	104.3	99.8	97	96.7	95.4	104.4	103.5	98.2	105.4	95.2
O00148	ATP-dependent RNA helicase DDX39A [OS=Homo sapiens]	34	15	78	7	427	49.1	5.68	170.43	15	DDX39A	94.7	94.1	95.2	96.2	87.9	105.4	107.4	114.3	93.2	111.8
O00151	PDZ and LIM domain protein 1 [OS=Homo sapiens]	77	19	94	19	329	36	7.02	217.29	19	PDLIM1	104.3	111.1	108.9	98.7	100.3	95.7	93.3	95.6	100.6	91.4
O00154	Cytosolic acyl coenzyme A thioester hydrolase [OS=Homo sapiens]	41	15	71	15	380	41.8	8.54	174.92	15	ACOT7	105.1	105.9	102.5	105	108.5	93.3	92.5	92.7	101.4	93.1
O00159	Unconventional myosin-Ic [OS=Homo sapiens]	29	28	77	27	1063	121.6	9.41	181.48	28	MYO1C	118.6	103	109.3	98.9	109.9	90.1	88.6	92.2	96	93.4
O00161	Synaptosomal-associated protein 23 [OS=Homo sapiens]	50	6	12	6	211	23.3	5.01	36.89	6	SNAP23	109.9	104.9	98.8	106.9	115.2	95.8	88.7	80.1	95.8	103.8
O00170	AH receptor-interacting protein [OS=Homo sapiens]	45	13	42	13	330	37.6	6.42	99.66	13	AIP	100	101.5	100.7	102.1	102.7	97.9	92.3	95.1	104.3	103.4
O00178	GTP-binding protein 1 [OS=Homo sapiens]	24	10	12	10	669	72.4	8.34	35.71	10	GTPBP1	106.9	105.3	106.3	107.6	100.7	99.5	92.7	102	94.5	84.5
O00186	Syntaxin-binding protein 3 [OS=Homo sapiens]	8	4	4	4	592	67.7	7.8	5.72	4	STXBP3	138.5	99.7	94	99.5	113.3	84.6	89.1	89.6	99.6	92.2
O00193	Small acidic protein [OS=Homo sapiens]	31	7	35	7	183	20.3	4.72	128.88	7	SMAP	94.3	104.2	97.4	110.4	107.6	98.6	93.7	99.2	101.9	92.7
O00203	AP-3 complex subunit beta-1 [OS=Homo sapiens]	24	23	49	23	1094	121.2	6.04	88.96	23	AP3B1	96.7	95.9	96.2	104	103.3	99.3	100.6	104.6	97.4	102
O00214	Galectin-8 [OS=Homo sapiens]	23	8	17	8	317	35.8	8.25	33.34	8	LGALS8	104.2	85.2	100.1	100.7	100.4	98	103.1	96.4	101.5	110.3
O00217	NADH dehydrogenase [ubiquinone] iron-sulfur protein 8, mitochondrial [OS=Homo sapiens]	27	6	9	6	210	23.7	6.34	14.8	6	NDUFS8	104.2	98.8	103.8	99.3	82.5	98	108.6	96.9	103.2	104.8
O00220	Tumor necrosis factor receptor superfamily member 10A [OS=Homo sapiens]	12	4	5	4	468	50.1	7.03	4.66	4	TNFRSF10A	104.5	86.4	104.4	108.2	108	97.7	96.5	85.9	95.8	112.7
O00221	NF-kappa-B inhibitor epsilon [OS=Homo sapiens]	6	2	4	2	500	52.8	6.68	11.45	2	NFKBIE	103.8	98	103.6	103.4	111.1	93.8	100.9	92.1	100.4	92.9
O00231	26S proteasome non-ATPase regulatory subunit 11 [OS=Homo sapiens]	55	22	84	22	422	47.4	6.48	176.01	22	PSMD11	96	86.4	93.1	104	106.8	101.3	106.1	100.7	102.9	102.7
O00232	26S proteasome non-ATPase regulatory subunit 12 [OS=Homo sapiens]	41	20	58	20	456	52.9	7.65	131.34	20	PSMD12	99.7	91.6	94	105.6	107	98.5	103.6	97	102.9	100
O00233	26S proteasome non-ATPase regulatory subunit 9 [OS=Homo sapiens]	44	11	43	11	223	24.7	6.95	80.82	11	PSMD9	101.8	107.1	100.6	103.9	109.2	96.1	96.2	98	96.2	90.8
O00244	Copper transport protein ATOX1 [OS=Homo sapiens]	76	5	42	5	68	7.4	7.24	108.44	5	ATOX1	90.2	99.5	95.7	97	97	101.5	104	98.4	115.8	100.9
O00255	Menin [OS=Homo sapiens]	4	2	2	2	615	68	6.55	5.9	2	MEN1	106.4	109.2	148.4	102.2	111.7	114.3	72.6	81	76	78
O00257	E3 SUMO-protein ligase CBX4 [OS=Homo sapiens]	15	7	7	7	560	61.3	9.36	14.82	7	CBX4	113	97.6	96.5	94.5	87.7	97.9	108.1	94.9	110.1	99.5
O00264	Membrane-associated progesterone receptor component 1 [OS=Homo sapiens]	40	10	27	9	195	21.7	4.7	58.86	10	PGRMC1	101.8	103.8	104.6	94.3	93.1	100.4	99.2	98.2	100.9	103.8
O00267	Transcription elongation factor SPT5 [OS=Homo sapiens]	27	22	50	22	1087	120.9	5.06	127.72	22	SUPT5H	99.5	96.9	99.4	103.1	105.5	98.6	103.5	98.9	93.2	101.4
O00268	Transcription initiation factor TFIID subunit 4 [OS=Homo sapiens]	9	7	8	7	1085	110	9.94	21.08	7	TAF4	95.3	90.1	99.2	91	90.4	104.3	121.2	111	105.7	91.8
O00273	DNA fragmentation factor subunit alpha [OS=Homo sapiens]	37	11	36	11	331	36.5	4.79	104.08	11	DFFA	112.1	106.8	108.2	108.6	115.8	88.6	90.2	87.5	94.1	88
O00287	Regulatory factor X-associated protein [OS=Homo sapiens]	18	3	4	3	272	28.2	5.54	9.63	3	RFXAP	103	96.1	107.6	99.5	103.6	98.5	94.2	93.3	101	103.2
O00291	Huntingtin-interacting protein 1 [OS=Homo sapiens]	5	4	4	4	1037	116.1	5.3	4.44	4	HIP1	75	98.9	103.1	82	105.8	103.5	107.2	109.1	113.7	101.8
O00299	Chloride intracellular channel protein 1 [OS=Homo sapiens]	78	19	297	18	241	26.9	5.17	915.31	19	CLIC1	97.5	96.1	94	100.7	104.9	100.8	99	101	103.5	102.4
O00303	Eukaryotic translation initiation factor 3 subunit F [OS=Homo sapiens]	36	13	65	13	357	37.5	5.45	103.25	13	EIF3F	104.6	100.1	102	103.8	98.8	100.8	101.9	97.7	90.8	99.5
O00308	NEDD4-like E3 ubiquitin-protein ligase WWP2 [OS=Homo sapiens]	5	4	8	3	870	98.9	7.12	17.17	4	WWP2	70.5	64.3	85.6	65.4	95.8	118	124.8	121.8	128.4	125.6
O00330	Pyruvate dehydrogenase protein X component, mitochondrial [OS=Homo sapiens]	17	8	14	8	501	54.1	8.66	28.31	8	PDHX	97.8	98	103.8	101.8	93	101.9	100	98.3	99.4	106.2
O00391	Sulfhydryl oxidase 1 [OS=Homo sapiens]	7	4	4	4	747	82.5	8.92	5.85	4	QSOX1	111.9	134.7	109.4	110	135.3	76.9	85	75.9	75.6	85.3
O00399	Dynactin subunit 6 [OS=Homo sapiens]	5	1	3	1	190	20.7	6.32	6.45	1	DCTN6	98.6	89.1	106.3	97.8	127.2	97.4	86.7	102.5	88.3	106
O00401	Actin nucleation-promoting factor WASL [OS=Homo sapiens]	15	8	14	8	505	54.8	7.93	9.43	8	WASL	95.8	89.2	96.4	100.5	98.4	103.1	98.8	102.7	107.7	107.3
O00410	Importin-5 [OS=Homo sapiens]	44	39	155	37	1097	123.6	4.94	422.32	39	IPO5	91	90.7	92.7	90.8	92.1	107.5	112.4	108.3	107.2	107.3
O00411	DNA-directed RNA polymerase, mitochondrial [OS=Homo sapiens]	9	7	8	7	1230	138.5	8.98	20.64	7	POLRMT	96	89.8	90.9	83.7	83	114.7	110.3	111.5	112.4	107.7
O00418	Eukaryotic elongation factor 2 kinase [OS=Homo sapiens]	5	5	7	5	725	82.1	5.33	10.74	5	EEF2K	99.5	105.6	109.1	118.3	94.2	94.1	88.6	108.9	89.2	92.4
O00421	C-C chemokine receptor-like 2 [OS=Homo sapiens]	3	1	1	1	344	39.5	7.77	1.88	1	CCRL2	127	59.4	139	108.1	93.5	92.6	73.4	80.4	93.2	133.6
O00422	Histone deacetylase complex subunit SAP18 [OS=Homo sapiens]	56	9	34	9	153	17.6	9.35	76.49	9	SAP18	100.1	99.8	98.1	93.1	88.6	109.5	100.7	105.6	104.2	100.2
O00425	Insulin-like growth factor 2 mRNA-binding protein 3 [OS=Homo sapiens]	50	27	60	24	579	63.7	8.87	113.64	27	IGF2BP3	98.7	97.2	102.2	102.4	95.6	98.7	99.2	102.3	102.6	101.1
O00429	Dynamin-1-like protein [OS=Homo sapiens]	44	27	60	27	736	81.8	6.81	128.86	27	DNM1L	100.8	101.1	100.3	104.7	105.7	97.6	102.7	98.7	94	94.4
O00442	RNA 3'-terminal phosphate cyclase [OS=Homo sapiens]	33	10	20	10	366	39.3	7.85	47.26	10	RTCA	97.3	86.5	100.7	111.8	119.6	95.1	98.1	97.9	93.3	99.6
O00443	Phosphatidylinositol 4-phosphate 3-kinase C2 domain-containing subunit alpha [OS=Homo sapiens]	2	3	3	3	1686	190.6	8.02	8.06	3	PIK3C2A	88.4	101.5	97.9	111.5	100.3	102.4	95.4	96.4	102.7	103.6
O00458	Interferon-related developmental regulator 1 [OS=Homo sapiens]	11	3	5	3	451	50.2	7.18	14.37	3	IFRD1	104.3	136.1	112.6	97	75.6	109.4	120.1	91.7	71.5	81.7
O00459	Phosphatidylinositol 3-kinase regulatory subunit beta [OS=Homo sapiens]	7	3	5	3	728	81.5	6.43	12.06	3	PIK3R2	86.7	81.2	90.2	95.5	108.5	93.8	101.3	105.1	124.4	113.3
O00461	Golgi integral membrane protein 4 [OS=Homo sapiens]	21	13	16	13	696	81.8	4.77	39.65	13	GOLIM4	115.4	106.5	106.3	87.6	104.1	94.4	87.9	88.4	103.3	106
O00468	Agrin [OS=Homo sapiens]	17	26	36	26	2068	217.2	6.39	98.24	26	AGRN	92.7	94.6	101.8	102.8	102.4	101.7	92.9	95.1	109.6	106.4
O00469	Procollagen-lysine,2-oxoglutarate 5-dioxygenase 2 [OS=Homo sapiens]	17	9	20	9	737	84.6	6.71	55.48	9	PLOD2	100.1	95.7	95.1	94.6	95.1	106.2	107.3	101.5	105.9	98.6
O00471	Exocyst complex component 5 [OS=Homo sapiens]	12	9	13	8	708	81.8	6.71	19	9	EXOC5	113.6	100.1	101.8	96.6	112.7	92.1	91.4	88.7	94.4	108.6
O00479	High mobility group nucleosome-binding domain-containing protein 4 [OS=Homo sapiens]	43	6	19	5	90	9.5	10.48	20.58	6	HMGN4	97	103.2	100.4	99.5	90.5	101.1	101.1	99.2	105.8	102.2
O00483	Cytochrome c oxidase subunit NDUFA4 [OS=Homo sapiens]	41	4	10	4	81	9.4	9.38	22.38	4	NDUFA4	109.6	111.1	109.8	98.6	83.7	96.6	103.2	99.4	96.4	91.5
O00487	26S proteasome non-ATPase regulatory subunit 14 [OS=Homo sapiens]	34	10	34	10	310	34.6	6.52	76.85	10	PSMD14	87.6	91.7	92.9	104.3	105.7	103.7	102.9	102	105.5	103.6
O00488	Zinc finger protein 593 [OS=Homo sapiens]	52	4	5	4	134	15.2	9.82	9.13	4	ZNF593	104.6	98.9	104.4	98.3	96.3	95.4	91.3	100.2	101.9	108.8
O00499	Myc box-dependent-interacting protein 1 [OS=Homo sapiens]	25	13	22	13	593	64.7	5.06	59.52	13	BIN1	95.1	99.3	94.3	104.1	98.6	100	100.1	105.7	104.5	98.4
O00505	Importin subunit alpha-4 [OS=Homo sapiens]	17	6	17	3	521	57.8	4.94	35.94	6	KPNA3	98.1	100.6	99.7	101.7	104	98.9	99.2	99.4	96.8	101.6
O00522	Krev interaction trapped protein 1 [OS=Homo sapiens]	1	1	1	1	736	84.3	8.41	2.18	1	KRIT1	131.8	93.4	107.3	112	61	92.8	99.6	104.5	112.6	85.2
O00541	Pescadillo homolog [OS=Homo sapiens]	33	20	48	20	588	68	7.33	100.63	20	PES1	109.4	101.4	108.1	95.2	91.6	98.8	107.4	99.3	93.6	95.3
O00559	Receptor-binding cancer antigen expressed on SiSo cells [OS=Homo sapiens]	29	3	5	3	213	24.4	6.29	10.4	3	EBAG9	121.6	66.7	100.8	103.3	71.2	97	102.2	120.3	103.5	113.3
O00560	Syntenin-1 [OS=Homo sapiens]	35	5	16	5	298	32.4	7.53	56.75	5	SDCBP	99.4	99.9	95.7	103.5	119.2	96.8	95.7	94.6	94.9	100.2
O00566	U3 small nucleolar ribonucleoprotein protein MPP10 [OS=Homo sapiens]	19	10	26	10	681	78.8	4.86	61.72	10	MPHOSPH10	104.3	107.7	102.7	91.6	90.6	104.3	107.5	104.9	94.5	91.9
O00567	Nucleolar protein 56 [OS=Homo sapiens]	48	26	98	26	594	66	9.19	219.81	26	NOP56	101.3	101.2	105.6	96.9	90.9	102	106.4	100.5	96.5	98.6
O00571	ATP-dependent RNA helicase DDX3X [OS=Homo sapiens]	50	32	106	31	662	73.2	7.18	214.27	32	DDX3X	100	99.8	101.8	96.6	89.6	106.2	104.6	105.4	96.1	99.7
O00584	Ribonuclease T2 [OS=Homo sapiens]	9	2	2	2	256	29.5	7.08	1.8	2	RNASET2	133.2	96.6	101.6	92.1	72.7	94.5	97.8	95	143	73.5
O00592	Podocalyxin [OS=Homo sapiens]	20	8	24	8	558	58.6	5.49	60.42	8	PODXL	98.9	95.8	97.7	88	85.4	105.2	107.8	106.4	106.1	108.6
O00622	CCN family member 1 [OS=Homo sapiens]	49	16	39	16	381	42	8.21	93.99	16	CCN1	95.5	111.8	99.5	94.2	97.5	105.2	104.9	101.3	94.7	95.4
O00629	Importin subunit alpha-3 [OS=Homo sapiens]	20	6	17	3	521	57.9	4.96	47.61	6	KPNA4	92	104.6	98.7	113.1	102.9	89.6	106.9	95.8	94.2	102.2
O00635	E3 ubiquitin-protein ligase TRIM38 [OS=Homo sapiens]	9	4	4	4	465	53.4	7.02	11.05	4	TRIM38	97.8	103.1	73.6	109.5	113.2	116.4	104.3	94.2	100.5	87.4
O00743	Serine/threonine-protein phosphatase 6 catalytic subunit [OS=Homo sapiens]	34	10	18	10	305	35.1	5.69	39.48	10	PPP6C	93.4	91	102.1	101	101.3	99.1	102.9	102.4	98.9	107.8
O00762	Ubiquitin-conjugating enzyme E2 C [OS=Homo sapiens]	42	8	17	8	179	19.6	7.37	39.2	8	UBE2C	118.3	111.3	110.6	77	75.4	104.7	120.8	112.4	86	83.5
O00764	Pyridoxal kinase [OS=Homo sapiens]	25	6	16	6	312	35.1	6.13	27.21	6	PDXK	101.4	94.9	97.5	100	114.5	93.1	98.5	98.7	99.3	102.1
O14493	Claudin-4 [OS=Homo sapiens]	4	1	2	1	209	22.1	8.05	0	1	CLDN4	111.3	74.9	86.5	115.1	177.7	68.4	69.7	65.4	103.6	127.4
O14497	AT-rich interactive domain-containing protein 1A [OS=Homo sapiens]	19	30	44	29	2285	241.9	6.7	103.04	30	ARID1A	91.1	96.6	97.7	93.5	85.3	107.2	112.5	111.5	97.9	106.8
O14524	Nuclear envelope integral membrane protein 1 [OS=Homo sapiens]	5	2	2	2	444	50.6	6.93	4.44	2	NEMP1	94.4	113.2	124.5	96.9	82.7	104.4	92.2	100.8	97.6	93.2
O14530	Thioredoxin domain-containing protein 9 [OS=Homo sapiens]	48	8	15	8	226	26.5	5.88	39.98	8	TXNDC9	102.6	97.3	105.8	101.1	109.1	96.8	102.6	96.1	93.2	95.3
O14545	TRAF-type zinc finger domain-containing protein 1 [OS=Homo sapiens]	14	6	8	6	582	64.8	5.29	11.89	6	TRAFD1	72.4	125.9	87.2	113.2	88.8	114.5	112.5	79.8	107.3	98.4
O14548	Cytochrome c oxidase subunit 7A-related protein, mitochondrial [OS=Homo sapiens]	32	4	7	4	114	12.6	9.42	13.57	4	COX7A2L	109.4	103.4	113.3	99.5	91.3	94.6	102.8	92.2	100.4	93
O14561	Acyl carrier protein, mitochondrial [OS=Homo sapiens]	9	1	5	1	156	17.4	4.93	14.13	1	NDUFAB1	103.3	77.7	79.4	117.3	81.4	108.3	110.2	106.6	99.3	116.5
O14562	Ubiquitin domain-containing protein UBFD1 [OS=Homo sapiens]	27	5	14	5	309	33.4	5.77	37.71	5	UBFD1	109.3	91.5	98.1	116.1	110.3	84	102.3	96.9	102.1	89.4
O14578	Citron Rho-interacting kinase [OS=Homo sapiens]	12	24	31	24	2027	231.3	6.57	57.47	24	CIT	107.7	108.1	110.8	92.7	92.7	100	99.9	98.5	96	93.7
O14579	Coatomer subunit epsilon [OS=Homo sapiens]	26	7	26	7	308	34.5	5.12	47.54	7	COPE	94.3	94.9	95.5	105.3	105.6	100.1	98.6	99.5	103.7	102.4
O14617	AP-3 complex subunit delta-1 [OS=Homo sapiens]	17	16	43	16	1153	130.1	8.48	86.71	16	AP3D1	97.9	98.5	97.2	107.3	104.7	100.9	100	101.6	92.8	99.1
O14618	Copper chaperone for superoxide dismutase [OS=Homo sapiens]	24	5	9	5	274	29	5.58	25.92	5	CCS	94.3	107.1	99.9	115.6	121.2	91.3	85	90.5	95.6	99.7
O14639	Actin-binding LIM protein 1 [OS=Homo sapiens]	16	10	17	10	778	87.6	8.59	30.1	10	ABLIM1	88.8	120.3	108.1	104.9	88.2	103.7	95.5	101.5	90.9	97.9
O14641	Segment polarity protein dishevelled homolog DVL-2 [OS=Homo sapiens]	18	10	23	9	736	78.9	6.02	58.35	10	DVL2	108.9	105.2	107.8	98.5	104.2	97.6	94.2	95.8	94.5	93.3
O14646	Chromodomain-helicase-DNA-binding protein 1 [OS=Homo sapiens]	9	13	19	13	1710	196.6	7.14	30.32	13	CHD1	108.9	101.4	101.6	93.6	86.7	105.1	103.4	101.2	97.5	100.7
O14647	Chromodomain-helicase-DNA-binding protein 2 [OS=Homo sapiens]	3	5	7	5	1828	211.2	8.1	9.29	5	CHD2	86.3	88.1	86	93.4	114.9	116.9	104.2	94.7	103.2	112.4
O14653	Golgi SNAP receptor complex member 2 [OS=Homo sapiens]	5	1	3	1	212	24.8	8.06	7.05	1	GOSR2	105.9	87.4	96.4	103.5	100.7	105.6	104	95.3	105.8	95.3
O14657	Torsin-1B [OS=Homo sapiens]	8	2	2	2	336	38	8.54	4.9	2	TOR1B	134.6	73.2	116.2	120	99.1	111	86.4	112.7	100.8	45.8
O14662	Syntaxin-16 [OS=Homo sapiens]	12	4	7	4	325	37	6.11	11.31	4	STX16	131.2	75.5	108.8	102.2	88.1	93.4	109.8	99.4	103.2	88.3
O14672	Disintegrin and metalloproteinase domain-containing protein 10 [OS=Homo sapiens]	18	11	23	11	748	84.1	7.77	62.71	11	ADAM10	109.1	104.6	103.4	97	100.5	94.8	100.2	92.3	98.4	99.8
O14681	Etoposide-induced protein 2.4 homolog [OS=Homo sapiens]	5	2	2	2	340	38.9	9.72	4.4	2	EI24	133.2	88.2	96.2	92.5	115.4	97.1	98.6	100.5	89.2	89
O14684	Prostaglandin E synthase [OS=Homo sapiens]	7	2	6	2	152	17.1	9.5	11.88	2	PTGES	78.9	99.3	106.4	119.9	118.7	79.5	77.6	78.3	137.7	103.8
O14686	Histone-lysine N-methyltransferase 2D [OS=Homo sapiens]	2	9	9	9	5537	593	5.58	14.06	9	KMT2D	84.8	108	92.3	92	95	88.9	110.8	104.2	114.2	109.8
O14727	Apoptotic protease-activating factor 1 [OS=Homo sapiens]	4	5	6	4	1248	141.7	6.4	11.75	5	APAF1	113.1	86.5	84.9	113	101.5	99.7	93.3	106.1	94.2	107.7
O14730	Serine/threonine-protein kinase RIO3 [OS=Homo sapiens]	10	6	8	6	519	59.1	5.76	9.68	6	RIOK3	100.3	91.3	106.5	96.9	103.9	98.8	100.5	101.7	104.1	95.9
O14732	Inositol monophosphatase 2 [OS=Homo sapiens]	6	2	2	2	288	31.3	6.61	4.49	2	IMPA2	91.1	81.7	88.1	109.5	110.1	97.8	107.7	106.5	113.3	94.1
O14733	Dual specificity mitogen-activated protein kinase kinase 7 [OS=Homo sapiens]	5	2	3	2	419	47.5	9.16	3.85	2	MAP2K7	121.6	106	119	100	84	92.6	93.5	99.1	95	89.1
O14737	Programmed cell death protein 5 [OS=Homo sapiens]	75	13	90	13	125	14.3	6.04	178.59	13	PDCD5	101.4	111.5	100.2	102.5	103	99.7	98.7	97.6	96.6	88.9
O14744	Protein arginine N-methyltransferase 5 [OS=Homo sapiens]	27	16	47	16	637	72.6	6.29	107.27	16	PRMT5	103.4	99.6	97.9	105	104.9	95.9	100.9	100.3	95.6	96.4
O14745	Na(+)/H(+) exchange regulatory cofactor NHE-RF1 [OS=Homo sapiens]	60	17	55	17	358	38.8	5.77	119.71	17	NHERF1	102.9	98.3	102.2	96.3	100.1	92.2	93.6	102.4	114.2	97.6
O14757	Serine/threonine-protein kinase Chk1 [OS=Homo sapiens]	17	6	12	6	476	54.4	8.25	32.45	6	CHEK1	106.4	112.9	110	97.7	95.2	94.6	98.4	96.6	92.1	96.1
O14773	Tripeptidyl-peptidase 1 [OS=Homo sapiens]	5	2	8	2	563	61.2	6.48	15.02	2	TPP1	100.7	87.5	87.7	82.3	101.3	105	99.2	107.9	115.4	113
O14775	Guanine nucleotide-binding protein subunit beta-5 [OS=Homo sapiens]	2	1	1	1	395	43.5	6.46	1.91	1	GNB5	159.7	73.7	55.2	97.8	83	96.2	101.9	100.8	94.7	137.1
O14776	Transcription elongation regulator 1 [OS=Homo sapiens]	16	21	44	21	1098	123.8	8.65	82.36	21	TCERG1	93.4	98.2	95.7	96.8	98.2	105.3	103.5	102.6	103.3	103
O14777	Kinetochore protein NDC80 homolog [OS=Homo sapiens]	22	16	23	16	642	73.9	5.6	42.9	16	NDC80	110.3	112.3	109	92.3	91.8	99.5	105	99.3	91.4	89.2
O14786	Neuropilin-1 [OS=Homo sapiens]	24	18	56	18	923	103.1	5.88	153.81	18	NRP1	100.4	96.2	104.4	102.8	104.8	95.5	90.8	91.5	102.9	110.7
O14787	Transportin-2 [OS=Homo sapiens]	9	8	32	3	897	101.3	5.01	60.74	8	TNPO2	124.7	96.4	118.6	103.9	96.9	91.8	103.2	93.1	92.3	79.1
O14791	Apolipoprotein L1 [OS=Homo sapiens]	2	1	1	1	398	43.9	5.81	2.12	1	APOL1	92.4	106.6	112.1	88.9	72.2	100.9	105.7	97.6	107.8	115.9
O14795	Protein unc-13 homolog B [OS=Homo sapiens]	1	2	2	2	1591	180.6	5.99	3.72	2	UNC13B	99.1	104.7	93	140.5	117.9	84.8	93.7	91	81.7	93.6
O14802	DNA-directed RNA polymerase III subunit RPC1 [OS=Homo sapiens]	7	8	10	8	1390	155.5	8.48	14.37	8	POLR3A	100.5	95.7	97.5	102.8	105.9	95.8	106.2	97.6	97.5	100.5
O14818	Proteasome subunit alpha type-7 [OS=Homo sapiens]	52	13	32	13	248	27.9	8.46	78.16	13	PSMA7	102.8	100	101.6	98	102.1	102.6	98.4	99.6	91.4	103.6
O14828	Secretory carrier-associated membrane protein 3 [OS=Homo sapiens]	42	11	42	11	347	38.3	7.64	132.2	11	SCAMP3	108.8	112.2	109.6	96.3	100	94.9	93.6	94.6	95.8	94.3
O14832	Phytanoyl-CoA dioxygenase, peroxisomal [OS=Homo sapiens]	2	1	1	1	338	38.5	8.47	0	1	PHYH	125.3	100.3	126.2	90.3	114.7	80.6	74.6	89.8	118.2	80.1
O14867	Transcription regulator protein BACH1 [OS=Homo sapiens]	4	3	4	3	736	81.9	5.05	6.41	3	BACH1	82.9	88.9	103.5	111.6	100.8	96.5	102.1	90.8	109.5	113.3
O14874	[3-methyl-2-oxobutanoate dehydrogenase [lipoamide]] kinase, mitochondrial [OS=Homo sapiens]	4	2	2	2	412	46.3	8.82	1.62	2	BCKDK	91.7	108.1	116	96.2	85.4	103.2	107.6	95.4	100.7	95.7
O14879	Interferon-induced protein with tetratricopeptide repeats 3 [OS=Homo sapiens]	43	15	48	14	490	56	5.2	113.6	15	IFIT3	105.9	107.6	108.9	122.5	131.8	85.7	82.8	84.5	79.6	90.5
O14880	Microsomal glutathione S-transferase 3 [OS=Homo sapiens]	20	2	6	2	152	16.5	9.38	16.52	2	MGST3	91.7	93.5	94.8	94.5	73.9	105.7	116.1	103.3	121.2	105.4
O14893	Gem-associated protein 2 [OS=Homo sapiens]	25	5	7	5	280	31.6	5.58	18.09	5	GEMIN2	89.5	106.8	107.5	100.1	107.8	98.6	93.7	94.7	105.9	95.3
O14907	Tax1-binding protein 3 [OS=Homo sapiens]	50	4	13	4	124	13.7	8.48	41.21	4	TAX1BP3	116.3	104	111.9	94.6	116.2	86	93.7	89.9	86.9	100.4
O14908	PDZ domain-containing protein GIPC1 [OS=Homo sapiens]	27	9	24	9	333	36	6.28	56.49	9	GIPC1	106.2	102.1	103.4	103.2	109.5	96.7	96.7	96.5	96	89.8
O14920	Inhibitor of nuclear factor kappa-B kinase subunit beta [OS=Homo sapiens]	9	6	8	6	756	86.5	5.78	15.59	6	IKBKB	95.9	97.1	94.5	97.4	110.6	95	105.2	96.6	98.9	108.8
O14925	Mitochondrial import inner membrane translocase subunit Tim23 [OS=Homo sapiens]	8	1	5	1	209	21.9	8.6	16.98	1	TIMM23	93.7	88.3	104.8	97.7	92.3	107.7	111.2	102.4	106.1	95.7
O14929	Histone acetyltransferase type B catalytic subunit [OS=Homo sapiens]	18	6	15	6	419	49.5	5.69	37.33	6	HAT1	110.9	85.1	100.3	98.7	106.9	95.6	112.8	107.5	88.7	93.5
O14933	Ubiquitin/ISG15-conjugating enzyme E2 L6 [OS=Homo sapiens]	5	1	1	1	153	17.8	7.88	2.26	1	UBE2L6	89.6	90.6	95.6	107.8	103.9	104.8	99.2	104.3	96.8	107.3
O14936	Peripheral plasma membrane protein CASK [OS=Homo sapiens]	5	4	4	4	926	105.1	6.43	8.81	4	CASK	50.3	96.1	87.5	127	107.3	98.4	91.3	121.5	84.9	135.7
O14949	Cytochrome b-c1 complex subunit 8 [OS=Homo sapiens]	29	3	7	3	82	9.9	10.08	8.35	3	UQCRQ	94.8	103	93	117.7	81.8	120.5	78.3	113.1	96.1	101.6
O14950	Myosin regulatory light chain 12B [OS=Homo sapiens]	52	9	75	5	172	19.8	4.84	197.89	9	MYL12B	89.8	92.9	94.5	105.2	103.8	101.5	100.1	102.5	103.4	106.3
O14964	Hepatocyte growth factor-regulated tyrosine kinase substrate [OS=Homo sapiens]	28	20	52	20	777	86.1	6.16	98.05	20	HGS	103.8	102.9	101	101.2	99.4	100.6	97.9	100.9	96.4	96
O14965	Aurora kinase A [OS=Homo sapiens]	18	6	12	6	403	45.8	9.39	27.29	6	AURKA	95.5	112.2	103.4	86.8	81.2	112.7	113.5	107.8	100.2	86.7
O14966	Ras-related protein Rab-7L1 [OS=Homo sapiens]	8	1	1	1	203	23.1	7.18	2.75	1	RAB29	122.5	100.8	134.6	109.2	96.5	90.4	89.8	91.4	78.5	86.2
O14967	Calmegin [OS=Homo sapiens]	5	3	5	3	610	70	4.69	3.47	3	CLGN	124.2	105.6	104	89.1	115.2	89.1	92	74.1	102.7	103.9
O14972	Vacuolar protein sorting-associated protein 26C [OS=Homo sapiens]	16	3	4	3	297	33	7.68	12.44	3	VPS26C	99.3	85.6	91.2	108.1	104.6	98.6	96.9	108.1	103.3	104.4
O14974	Protein phosphatase 1 regulatory subunit 12A [OS=Homo sapiens]	37	37	95	36	1030	115.2	5.4	219.24	37	PPP1R12A	98.4	104	96.9	101.8	102.9	100.4	98.8	100.1	98.3	98.5
O14976	Cyclin-G-associated kinase [OS=Homo sapiens]	3	3	7	3	1311	143.1	5.73	20.11	3	GAK	99.9	94.4	100.2	91.5	91.2	98	92.7	101.7	115.8	114.5
O14979	Heterogeneous nuclear ribonucleoprotein D-like [OS=Homo sapiens]	40	19	128	17	420	46.4	9.57	237.09	19	HNRNPDL	97.4	106.5	101.4	90.7	82.4	107	109.8	105.3	101	98.6
O14980	Exportin-1 [OS=Homo sapiens]	20	18	40	18	1071	123.3	6.06	95.09	18	XPO1	100.6	92.5	101.8	103.5	101	96.1	103.6	100.5	98.8	101.6
O14981	TATA-binding protein-associated factor 172 [OS=Homo sapiens]	8	15	19	15	1849	206.8	6.52	25.66	15	BTAF1	99.2	101.3	103.9	100.2	105.9	97.3	98.4	99.1	98.8	95.8
O15013	Rho guanine nucleotide exchange factor 10 [OS=Homo sapiens]	6	6	9	6	1369	151.5	5.68	13.52	6	ARHGEF10	104.8	108	101.6	93.5	109	96.8	98.4	96.4	94.3	97.3
O15014	Zinc finger protein 609 [OS=Homo sapiens]	6	7	8	7	1411	151.1	8.03	17.17	7	ZNF609	87.7	101.6	91.3	99.6	80.4	117.3	104.6	112.1	101.1	104.3
O15020	Spectrin beta chain, non-erythrocytic 2 [OS=Homo sapiens]	5	13	25	4	2390	271.2	6.11	39.56	13	SPTBN2	94.2	99.9	98.4	92.8	97.9	91.4	105.6	111.9	119.2	88.8
O15021	Microtubule-associated serine/threonine-protein kinase 4 [OS=Homo sapiens]	5	11	11	11	2623	283.9	8.62	25.96	11	MAST4	116.1	129	116.9	107.5	98.7	93.1	81.7	87.7	93.4	75.9
O15027	Protein transport protein Sec16A [OS=Homo sapiens]	17	29	47	29	2357	251.7	5.8	111.79	29	SEC16A	94.6	99.1	105.8	108.3	107.8	93.2	97.4	95	97.9	100.9
O15031	Plexin-B2 [OS=Homo sapiens]	17	21	32	21	1838	205	6.24	93.27	21	PLXNB2	103.1	94.5	103.1	101	99.8	95.1	96.6	95.7	107.5	103.4
O15037	Protein KHNYN [OS=Homo sapiens]	1	1	1	1	678	74.5	7.02	2.04	1	KHNYN	89.8	129.9	126	91.2	106.5	79.9	123	95.3	88.1	70.4
O15042	U2 snRNP-associated SURP motif-containing protein [OS=Homo sapiens]	15	15	46	14	1029	118.2	8.47	85.9	15	U2SURP	94.2	102	93.4	94.4	90.5	109.1	107.8	105.4	100.7	102.6
O15047	Histone-lysine N-methyltransferase SETD1A [OS=Homo sapiens]	3	4	5	4	1707	185.9	5.14	8.23	4	SETD1A	82	104.2	103.1	82.5	76.7	110.7	96.7	107.7	106.2	130
O15056	Synaptojanin-2 [OS=Homo sapiens]	16	19	33	19	1496	165.4	7.34	72.14	19	SYNJ2	92.2	97.1	98.5	101.3	94.3	101.4	97.5	104.4	108.6	104.7
O15061	Synemin [OS=Homo sapiens]	16	21	33	21	1565	172.8	5.15	79.09	21	SYNM	104.2	111	106	113.9	91.7	93.8	95.3	94.5	95.1	94.5
O15066	Kinesin-like protein KIF3B [OS=Homo sapiens]	17	9	12	9	747	85.1	7.69	29.2	9	KIF3B	105.3	101.7	104.1	96.9	105	99.6	100.5	93.7	95.9	97.3
O15067	Phosphoribosylformylglycinamidine synthase [OS=Homo sapiens]	33	33	96	33	1338	144.6	5.76	211.05	33	PFAS	94.1	98.5	95.3	95	95.5	106.2	102.7	104.6	100.4	107.6
O15078	Centrosomal protein of 290 kDa [OS=Homo sapiens]	1	3	3	3	2479	290.2	5.95	4.28	3	CEP290	92.4	90.7	104.6	114.9	105.9	100.3	113.1	87.7	92.9	97.5
O15084	Serine/threonine-protein phosphatase 6 regulatory ankyrin repeat subunit A [OS=Homo sapiens]	9	7	12	6	1053	112.9	6.25	35.54	7	ANKRD28	88.3	69.9	104.2	105.1	122.1	110.7	99.6	97.3	104.9	97.8
O15085	Rho guanine nucleotide exchange factor 11 [OS=Homo sapiens]	1	2	2	2	1522	167.6	5.5	0	2	ARHGEF11	95.8	96.5	95	114.6	95.2	93.8	101.2	97.4	128.6	81.8
O15091	Mitochondrial ribonuclease P catalytic subunit [OS=Homo sapiens]	4	2	3	2	583	67.3	8.78	4.13	2	PRORP	109.6	97	94.3	92.2	108.4	81	96.2	96.1	114.9	110.3
O15111	Inhibitor of nuclear factor kappa-B kinase subunit alpha [OS=Homo sapiens]	5	2	2	2	745	84.6	6.73	3.7	2	CHUK	115.5	93.1	106.8	112.6	87.3	99.9	87.8	100.7	100.8	95.6
O15116	U6 snRNA-associated Sm-like protein LSm1 [OS=Homo sapiens]	17	2	6	2	133	15.2	5.22	20.72	2	LSM1	93.4	84.5	101.3	105.3	115.5	106.2	91.6	91.8	96.4	114
O15118	NPC intracellular cholesterol transporter 1 [OS=Homo sapiens]	4	5	10	5	1278	142.1	5.36	19.78	5	NPC1	104.8	94.6	96.4	104.2	101.2	94.3	90.5	91.6	108.6	113.8
O15120	1-acyl-sn-glycerol-3-phosphate acyltransferase beta [OS=Homo sapiens]	6	1	3	1	278	30.9	9.01	7.44	1	AGPAT2	99.9	97.4	104.8	106.5	116.4	96.3	87.9	92.1	96.9	101.6
O15121	Sphingolipid delta(4)-desaturase DES1 [OS=Homo sapiens]	10	2	4	2	323	37.8	7.46	10.82	2	DEGS1	120.4	91.8	107.5	103.2	87.4	114	92.5	84.8	95.9	102.3
O15126	Secretory carrier-associated membrane protein 1 [OS=Homo sapiens]	22	6	17	6	338	37.9	7.42	43.96	6	SCAMP1	111.7	102.1	106	97.2	89.1	95.7	95.5	98.5	103.4	100.9
O15127	Secretory carrier-associated membrane protein 2 [OS=Homo sapiens]	16	4	18	4	329	36.6	6.1	51.78	4	SCAMP2	102.9	101.9	108.3	96.3	87.4	101.8	99.8	99.9	101	100.7
O15143	Actin-related protein 2/3 complex subunit 1B [OS=Homo sapiens]	37	12	38	11	372	40.9	8.35	101.11	12	ARPC1B	89.8	99	95.9	102.5	104.6	102.2	96.8	101.9	105.6	101.7
O15144	Actin-related protein 2/3 complex subunit 2 [OS=Homo sapiens]	35	12	35	12	300	34.3	7.36	41.09	12	ARPC2	101.5	87.3	101.2	105.6	106.2	93.7	105.5	99.8	100.4	98.9
O15145	Actin-related protein 2/3 complex subunit 3 [OS=Homo sapiens]	34	7	27	7	178	20.5	8.59	37.93	7	ARPC3	98.5	94.8	97.2	104.2	100.6	99.6	97.8	99.2	104.7	103.4
O15155	BET1 homolog [OS=Homo sapiens]	25	2	7	2	118	13.3	9.06	13	2	BET1	84.1	92.3	91.1	103.1	101.1	108.5	99.7	97.1	113	110.1
O15160	DNA-directed RNA polymerases I and III subunit RPAC1 [OS=Homo sapiens]	34	9	23	9	346	39.2	5.5	55.18	9	POLR1C	103	99.3	102.1	101.1	99.6	100.6	103.4	98.6	91.4	100.9
O15164	Transcription intermediary factor 1-alpha [OS=Homo sapiens]	11	8	15	6	1050	116.8	7.11	41.8	8	TRIM24	97.5	101.8	105.4	104.6	97.6	100.3	97.4	102.7	94.7	98.1
O15169	Axin-1 [OS=Homo sapiens]	2	1	1	1	862	95.6	6.96	0	1	AXIN1	92.8	99.7	103	110.2	120.5	93.2	99.8	87.9	108.1	84.7
O15173	Membrane-associated progesterone receptor component 2 [OS=Homo sapiens]	18	5	17	4	223	23.8	4.88	32.31	5	PGRMC2	109.1	104.5	94.7	100.1	92.8	109.3	94.3	100.4	100.8	94
O15182	Centrin-3 [OS=Homo sapiens]	26	6	10	5	167	19.5	4.74	14.92	6	CETN3	110.2	110.1	108.7	91.2	82.7	99	114.8	105.7	88.2	89.5
O15211	Ral guanine nucleotide dissociation stimulator-like 2 [OS=Homo sapiens]	6	3	4	3	777	83.5	6.18	4.89	3	RGL2	87.2	85.5	100.9	111.1	123.1	98.6	94.4	99.6	99.7	99.9
O15212	Prefoldin subunit 6 [OS=Homo sapiens]	59	8	38	8	129	14.6	8.88	87.02	8	PFDN6	97.2	103.8	101.9	100.7	107.4	96.3	97.9	96	102.5	96.4
O15213	WD repeat-containing protein 46 [OS=Homo sapiens]	22	9	16	9	610	68	9.67	42.67	9	WDR46	100.6	110.4	98.4	93	85.7	104.7	110.4	102.3	95	99.5
O15226	NF-kappa-B-repressing factor [OS=Homo sapiens]	26	17	32	17	690	77.6	8.79	60.04	17	NKRF	104.9	100.8	101.7	94.2	95.9	103.3	106.5	102.4	96	94.2
O15228	Dihydroxyacetone phosphate acyltransferase [OS=Homo sapiens]	1	1	1	1	680	77.1	6.57	0	1	GNPAT	124.8	141.1	105.5	82.2	94.3	93.3	72	73.4	104.9	108.5
O15230	Laminin subunit alpha-5 [OS=Homo sapiens]	8	22	32	22	3695	399.5	7.02	70.18	22	LAMA5	97.1	95.6	95.6	98.3	87.8	98.5	89	96.7	128.9	112.5
O15231	Zinc finger protein 185 [OS=Homo sapiens]	63	35	119	35	689	73.5	7.01	282.41	35	ZNF185	107.8	108.8	106.9	92.2	90.9	99.4	102.2	97.5	98.6	95.9
O15234	Protein CASC3 [OS=Homo sapiens]	6	4	4	4	703	76.2	6.48	10.05	4	CASC3	101.5	76	107.4	115.5	101	108	116.2	97.3	90.4	86.7
O15235	28S ribosomal protein S12, mitochondrial [OS=Homo sapiens]	18	3	3	3	138	15.2	10.29	1.83	3	MRPS12	103.8	100	114	103	76.6	100.8	95.5	102.6	96.6	107.2
O15258	Protein RER1 [OS=Homo sapiens]	4	1	5	1	196	22.9	9.54	4.27	1	RER1	110.1	118.9	109.9	107.9	104.1	90.8	92.8	90.8	87.9	86.7
O15260	Surfeit locus protein 4 [OS=Homo sapiens]	4	1	1	1	269	30.4	7.78	2.21	1	SURF4	89.5	91	102.9	109	101.9	101.4	98.4	99.3	105.4	101.2
O15264	Mitogen-activated protein kinase 13 [OS=Homo sapiens]	8	3	5	2	365	42.1	8.38	4.38	3	MAPK13	95.8	99.6	96.7	107.1	94.2	100.7	104.4	105.5	99.4	96.6
O15269	Serine palmitoyltransferase 1 [OS=Homo sapiens]	29	13	21	13	473	52.7	6.01	40.41	13	SPTLC1	101.4	111.4	102	96.6	99.4	97.3	91.9	95.8	97.2	106.9
O15270	Serine palmitoyltransferase 2 [OS=Homo sapiens]	17	7	11	7	562	62.9	7.78	20.76	7	SPTLC2	118.4	95.6	75.8	98.8	98.6	102.5	84.1	89.6	140.9	95.6
O15294	UDP-N-acetylglucosamine--peptide N-acetylglucosaminyltransferase 110 kDa subunit [OS=Homo sapiens]	20	15	27	15	1046	116.9	6.7	73.22	15	OGT	103.1	97.8	105	99.4	95.4	101.6	101.4	101.8	97.7	96.8
O15304	Apoptosis regulatory protein Siva [OS=Homo sapiens]	18	2	3	2	175	18.7	7.61	7.93	2	SIVA1	85	101.9	103.3	78.1	80.5	115.2	106.1	122.7	105.9	101.3
O15305	Phosphomannomutase 2 [OS=Homo sapiens]	43	12	28	11	246	28.1	6.77	46.9	12	PMM2	103.7	99.2	97.2	108.4	110.8	96.6	97.2	95.1	93.5	98.4
O15321	Transmembrane 9 superfamily member 1 [OS=Homo sapiens]	4	2	4	2	606	68.8	7.17	7.06	2	TM9SF1	153.2	119	118.5	92.8	97.9	77.4	69.2	68.3	102.4	101.3
O15344	E3 ubiquitin-protein ligase Midline-1 [OS=Homo sapiens]	13	6	9	6	667	75.2	6.8	15.74	6	MID1	101.2	112	89.8	118	107.3	105.6	98.6	99.8	86.8	81
O15347	High mobility group protein B3 [OS=Homo sapiens]	54	12	54	10	200	23	8.37	121.73	12	HMGB3	91.5	101.6	97.7	103.6	101.7	101.8	93	98.5	107.2	103.4
O15355	Protein phosphatase 1G [OS=Homo sapiens]	44	21	76	21	546	59.2	4.36	218.1	21	PPM1G	99.3	106.4	102.6	97.3	98	101.7	102	99.3	96.8	96.5
O15357	Phosphatidylinositol 3,4,5-trisphosphate 5-phosphatase 2 [OS=Homo sapiens]	17	13	25	13	1258	138.5	6.54	64.61	13	INPPL1	100.1	94.3	100	101.3	101.1	98.3	95.8	101.5	100.5	106.9
O15371	Eukaryotic translation initiation factor 3 subunit D [OS=Homo sapiens]	59	24	108	24	548	63.9	6.05	369.05	24	EIF3D	96.9	99.2	98.5	98.6	100	104.7	102.4	101.9	98.4	99.4
O15372	Eukaryotic translation initiation factor 3 subunit H [OS=Homo sapiens]	41	18	67	18	352	39.9	6.54	150.63	18	EIF3H	103.3	104.8	100.6	100	100.7	98.8	102.9	99.2	95.6	94.1
O15379	Histone deacetylase 3 [OS=Homo sapiens]	6	2	3	2	428	48.8	5.16	6.11	2	HDAC3	97.6	85.8	102.6	96.7	94	98.1	103.2	115	97.2	109.8
O15381	Nuclear valosin-containing protein-like [OS=Homo sapiens]	16	10	13	10	856	95	6.48	34.33	10	NVL	101.2	104.8	94.9	92.3	83.6	112.9	113.2	105.7	96.8	94.7
O15382	Branched-chain-amino-acid aminotransferase, mitochondrial [OS=Homo sapiens]	8	2	6	2	392	44.3	8.65	17.62	2	BCAT2	89.2	97	104.2	101.7	96.1	102.5	100.9	101.3	102.6	104.6
O15392	Baculoviral IAP repeat-containing protein 5 [OS=Homo sapiens]	8	1	1	1	142	16.4	5.9	2.49	1	BIRC5	87	98.4	117.1	84.5	110.5	96.8	115.5	98.5	90.5	101.2
O15397	Importin-8 [OS=Homo sapiens]	7	6	12	5	1037	119.9	5.16	22.84	6	IPO8	94.4	101.7	93.4	100.7	111.9	98.5	97	102.1	95.8	104.5
O15400	Syntaxin-7 [OS=Homo sapiens]	39	9	29	9	261	29.8	5.55	84.51	9	STX7	108.5	99.6	108.5	102.2	99.6	95	96.6	94.1	99.9	96
O15417	Trinucleotide repeat-containing gene 18 protein [OS=Homo sapiens]	3	7	7	7	2968	314.3	8.7	13.37	7	TNRC18	53.3	63.8	51.4	59.8	234.5	127.5	102.1	149	72.7	85.9
O15427	Monocarboxylate transporter 4 [OS=Homo sapiens]	11	4	13	4	465	49.4	7.96	15.34	4	SLC16A3	125	108	102	94.1	114.4	91.4	84.5	83.9	92.1	104.7
O15446	DNA-directed RNA polymerase I subunit RPA34 [OS=Homo sapiens]	40	11	34	11	510	55	8.51	119.41	11	POLR1G	99.1	108	109	96.5	97.5	101.3	103	99.9	93.3	92.4
O15460	Prolyl 4-hydroxylase subunit alpha-2 [OS=Homo sapiens]	21	10	17	10	535	60.9	5.71	30.91	10	P4HA2	102.4	96.8	96.3	95.7	88.2	105.4	94.9	109.7	104.5	106.2
O15498	Synaptobrevin homolog YKT6 [OS=Homo sapiens]	29	6	19	6	198	22.4	6.92	32.94	6	YKT6	97.6	100.7	96.6	109.2	107.5	96.1	98.6	102.4	91.7	99.6
O15504	Nucleoporin NUP42 [OS=Homo sapiens]	9	3	4	3	423	44.8	9.19	7.49	3	NUP42	90.7	78	112.6	109.8	94.3	104.9	112.2	112.6	110.1	74.8
O15511	Actin-related protein 2/3 complex subunit 5 [OS=Homo sapiens]	77	9	29	8	151	16.3	5.67	68.7	9	ARPC5	100.6	95.7	90.3	102	106.4	96.2	97.2	101.1	107.2	103.4
O15514	DNA-directed RNA polymerase II subunit RPB4 [OS=Homo sapiens]	36	3	11	3	142	16.3	4.79	40.15	3	POLR2D	103	107.3	104.5	90.8	95.8	98	97.2	95	99.7	108.8
O15525	Transcription factor MafG [OS=Homo sapiens]	15	3	4	2	162	17.8	10.04	8.58	3	MAFG	80	109.4	98.9	117.8	86.5	116.5	104.6	95.7	92	98.7
O15530	3-phosphoinositide-dependent protein kinase 1 [OS=Homo sapiens]	9	4	5	4	556	63.1	7.36	10.13	4	PDPK1	96.8	97.6	108	103.4	104.4	98.9	95.2	101.8	101.1	92.7
O15533	Tapasin [OS=Homo sapiens]	4	2	4	2	448	47.5	6.99	3.76	2	TAPBP	111.3	104.2	92.2	83.1	103.1	92.2	89.5	92.1	112.4	119.9
O15541	E3 ubiquitin-protein ligase RNF113A [OS=Homo sapiens]	41	11	18	11	343	38.8	5.69	42.38	11	RNF113A	87.9	104.4	92.2	115.2	106.8	102.2	96.4	105.8	97.4	91.6
O15554	Intermediate conductance calcium-activated potassium channel protein 4 [OS=Homo sapiens]	4	2	2	2	427	47.7	9.83	4.01	2	KCNN4	109.3	80.4	97.3	94.7	118.4	87.8	91.5	93.4	106.8	120.5
O43143	ATP-dependent RNA helicase DHX15 [OS=Homo sapiens]	33	27	129	27	795	90.9	7.46	313.25	27	DHX15	101	97.5	99	96.7	94.8	103.6	104.2	104.4	99.6	99.3
O43148	mRNA cap guanine-N7 methyltransferase [OS=Homo sapiens]	26	9	13	9	476	54.8	6.61	27.84	9	RNMT	99.3	97.7	97.6	105.7	109.3	95.6	108.1	100.4	94	92.3
O43149	Zinc finger ZZ-type and EF-hand domain-containing protein 1 [OS=Homo sapiens]	2	4	5	4	2961	330.9	5.95	8.78	4	ZZEF1	90.4	95	85.6	111.3	107.5	96.1	99.3	100.6	105.3	108.9
O43150	Arf-GAP with SH3 domain, ANK repeat and PH domain-containing protein 2 [OS=Homo sapiens]	2	2	2	2	1006	111.6	6.68	4.99	2	ASAP2	98	99.7	133.8	117.3	107.7	98.6	83.4	100	87.5	74
O43156	TELO2-interacting protein 1 homolog [OS=Homo sapiens]	4	4	5	4	1089	122	5.97	4.35	4	TTI1	89.8	105	102.9	101.5	97.4	107.4	98.4	98.2	94.1	105.2
O43159	Ribosomal RNA-processing protein 8 [OS=Homo sapiens]	32	12	20	12	456	50.7	9.42	43.65	12	RRP8	94.2	103.9	100.7	96	88.1	103.2	114	101.1	96	102.9
O43164	E3 ubiquitin-protein ligase Praja-2 [OS=Homo sapiens]	14	6	9	6	708	78.2	4.39	22.71	6	PJA2	90.9	90.9	92.2	100.5	99.2	99.4	102.9	106.1	111.2	106.6
O43166	Signal-induced proliferation-associated 1-like protein 1 [OS=Homo sapiens]	9	12	14	11	1804	199.9	8.19	31.2	12	SIPA1L1	110.7	95.6	103.3	101.5	88.8	101.5	91	96.8	111.3	99.5
O43169	Cytochrome b5 type B [OS=Homo sapiens]	13	3	5	3	150	16.7	4.97	8.21	3	CYB5B	119.4	79.8	79.6	82.1	77.8	101.7	140.1	103.4	107.9	108.1
O43172	U4/U6 small nuclear ribonucleoprotein Prp4 [OS=Homo sapiens]	44	22	61	22	522	58.4	7.42	144.3	22	PRPF4	100	99.3	104.5	96.4	92.8	103.6	103	101	98.3	101.1
O43175	D-3-phosphoglycerate dehydrogenase [OS=Homo sapiens]	39	18	72	18	533	56.6	6.71	179.76	18	PHGDH	94.3	95.2	95.3	102	104.8	100.7	99.6	101.5	102.9	103.7
O43181	NADH dehydrogenase [ubiquinone] iron-sulfur protein 4, mitochondrial [OS=Homo sapiens]	32	6	15	6	175	20.1	10.3	38.52	6	NDUFS4	107.2	98.4	106.9	90.1	87.8	94.4	110.9	103.7	104.6	96
O43187	Interleukin-1 receptor-associated kinase-like 2 [OS=Homo sapiens]	6	4	4	4	625	69.4	5.72	8.72	4	IRAK2	85.3	74.7	93.2	100.6	104.7	114.5	96.3	101.6	125.1	104.2
O43189	PHD finger protein 1 [OS=Homo sapiens]	7	3	5	3	567	62.1	9.01	7.3	3	PHF1	89.4	88	98.3	89.8	104.5	113.6	94.9	111.5	101.4	108.6
O43237	Cytoplasmic dynein 1 light intermediate chain 2 [OS=Homo sapiens]	41	17	47	16	492	54.1	6.38	86.59	17	DYNC1LI2	90.6	87.7	95.7	94.1	94.4	105.5	107.4	106.4	112.2	106.1
O43242	26S proteasome non-ATPase regulatory subunit 3 [OS=Homo sapiens]	41	27	79	27	534	60.9	8.44	168.66	27	PSMD3	89.7	93.5	95	104	103	100.4	100.2	102.7	102.6	108.8
O43251	RNA binding protein fox-1 homolog 2 [OS=Homo sapiens]	19	4	8	4	390	41.3	7.27	25.22	4	RBFOX2	88.7	96.7	109.4	94.1	98.9	105.6	102.1	108.5	92.8	103.2
O43252	Bifunctional 3'-phosphoadenosine 5'-phosphosulfate synthase 1 [OS=Homo sapiens]	28	16	43	14	624	70.8	6.86	104.31	16	PAPSS1	95.1	97.8	95.3	109.2	97	101.1	97.7	107.5	98.6	100.7
O43264	Centromere/kinetochore protein zw10 homolog [OS=Homo sapiens]	21	14	30	14	779	88.8	6.27	76.59	14	ZW10	106.4	106.5	105.5	100.6	101.6	97	96.9	97	95.3	93.3
O43290	U4/U6.U5 tri-snRNP-associated protein 1 [OS=Homo sapiens]	47	32	78	32	800	90.2	6.13	173.62	32	SART1	101	101.2	100.7	94.8	91.8	102.3	105.1	102.4	102.9	97.8
O43291	Kunitz-type protease inhibitor 2 [OS=Homo sapiens]	29	6	17	6	252	28.2	8.29	39.03	6	SPINT2	99.1	93.2	99.7	88.2	103.1	96.4	114.2	93.3	114.6	98.3
O43293	Death-associated protein kinase 3 [OS=Homo sapiens]	4	2	2	2	454	52.5	6.89	4.24	2	DAPK3	122.6	102.7	112.3	108.2	98.7	91.9	95.9	95.7	92.2	79.9
O43294	Transforming growth factor beta-1-induced transcript 1 protein [OS=Homo sapiens]	18	8	14	8	461	49.8	7.03	19.77	8	TGFB1I1	106.1	104.6	104.3	93.9	107.7	104.3	99.9	95.1	92.1	92
O43299	AP-5 complex subunit zeta-1 [OS=Homo sapiens]	1	1	1	1	807	88.5	7.01	2.08	1	AP5Z1	81.8	100	132.6	104.6	107.9	85.1	89.4	92	80.8	125.9
O43314	Inositol hexakisphosphate and diphosphoinositol-pentakisphosphate kinase 2 [OS=Homo sapiens]	16	15	24	10	1243	140.3	8.22	53.18	15	PPIP5K2	102.7	93.8	92.6	105.7	104.1	99.6	101.6	95.1	102.6	102.3
O43318	Mitogen-activated protein kinase kinase kinase 7 [OS=Homo sapiens]	16	7	8	7	606	67.2	7.11	17.13	7	MAP3K7	86.5	81.8	96.8	96.1	105.4	104.8	105.2	99.2	98.8	125.4
O43324	Eukaryotic translation elongation factor 1 epsilon-1 [OS=Homo sapiens]	46	8	14	8	174	19.8	8.54	42.32	8	EEF1E1	98.8	92.9	98.9	104.6	99.4	96.8	105.5	102.4	100.9	99.8
O43353	Receptor-interacting serine/threonine-protein kinase 2 [OS=Homo sapiens]	7	3	3	3	540	61.2	7.09	2.84	3	RIPK2	92.7	105.8	92.7	115.4	138.7	71	107.3	90.4	111.2	74.9
O43379	WD repeat-containing protein 62 [OS=Homo sapiens]	13	16	24	16	1518	165.8	5.91	60.62	16	WDR62	116	109.4	95	93.7	112.2	87.8	90.9	93.9	99.1	102.2
O43390	Heterogeneous nuclear ribonucleoprotein R [OS=Homo sapiens]	51	30	213	20	633	70.9	8.13	513.93	30	HNRNPR	105.4	99.7	103.9	98.6	92.2	99.7	103.2	102.9	96.4	97.9
O43395	U4/U6 small nuclear ribonucleoprotein Prp3 [OS=Homo sapiens]	33	20	57	20	683	77.5	9.5	141.96	20	PRPF3	98.6	108.6	101.2	97.2	95.7	102.3	99.7	101.8	98.4	96.6
O43396	Thioredoxin-like protein 1 [OS=Homo sapiens]	54	11	31	11	289	32.2	4.96	101.14	11	TXNL1	99.9	99.2	103.5	107.2	118.6	91.6	98	91.1	94.8	96.1
O43399	Tumor protein D54 [OS=Homo sapiens]	80	19	96	19	206	22.2	5.36	190.63	19	TPD52L2	103.8	99.8	103.5	102.9	113.3	93.6	95.7	89.8	97.6	100
O43402	ER membrane protein complex subunit 8 [OS=Homo sapiens]	44	9	18	9	210	23.8	6.4	39.71	9	EMC8	89.1	90.3	89.1	84.7	91.9	108.9	113.6	112.7	115.5	104.2
O43422	52 kDa repressor of the inhibitor of the protein kinase [OS=Homo sapiens]	4	3	4	3	761	87.6	5.86	9.58	3	THAP12	98.8	123.2	104.4	116.1	95.3	96.7	90.6	97.6	85.1	92.1
O43426	Synaptojanin-1 [OS=Homo sapiens]	3	4	5	4	1573	173	7.42	5.29	4	SYNJ1	70.3	109.6	85.4	108.9	116.6	82.4	92.5	109.3	109.4	115.8
O43432	Eukaryotic translation initiation factor 4 gamma 3 [OS=Homo sapiens]	17	26	54	18	1585	176.5	5.38	100.2	26	EIF4G3	105.1	105.8	109.1	112.8	108.7	92.1	92.5	90.6	94.3	89.1
O43447	Peptidyl-prolyl cis-trans isomerase H [OS=Homo sapiens]	57	10	38	8	177	19.2	8.07	61.9	10	PPIH	96.3	96	93.6	96.3	90.8	108.3	104.4	110.5	100.5	103.2
O43464	Serine protease HTRA2, mitochondrial [OS=Homo sapiens]	3	1	4	1	458	48.8	10.07	10.78	1	HTRA2	126.1	88.6	90.7	104.4	157.7	90.2	87.3	96.7	80.7	77.7
O43488	Aflatoxin B1 aldehyde reductase member 2 [OS=Homo sapiens]	27	9	20	9	359	39.6	7.17	42.49	9	AKR7A2	103.8	96.5	108.4	109.5	111.5	91.3	93.3	96.8	99.2	89.7
O43491	Band 4.1-like protein 2 [OS=Homo sapiens]	33	23	45	23	1005	112.5	5.44	115.26	23	EPB41L2	120.7	103.9	110.3	98	112.8	89.8	88.9	90.3	88.5	96.7
O43493	Trans-Golgi network integral membrane protein 2 [OS=Homo sapiens]	34	14	21	14	437	45.9	5.63	36.9	14	TGOLN2	125	109.4	106.4	91.5	105.7	94.2	89.6	84	99.9	94.3
O43502	DNA repair protein RAD51 homolog 3 [OS=Homo sapiens]	3	1	1	1	376	42.2	6.74	1.78	1	RAD51C	112.3	95.8	103.7	113.2	91.4	124.6	108.6	100.6	63.9	85.9
O43504	Ragulator complex protein LAMTOR5 [OS=Homo sapiens]	48	2	8	2	91	9.6	4.87	26.05	2	LAMTOR5	93	109.9	96	98.6	105.5	101.1	101.4	100.6	100	94
O43513	Mediator of RNA polymerase II transcription subunit 7 [OS=Homo sapiens]	15	2	3	2	233	27.2	5.78	10.26	2	MED7	91.8	65.9	138.7	88.6	102.6	116	95.8	107	119.5	74.1
O43516	WAS/WASL-interacting protein family member 1 [OS=Homo sapiens]	5	2	2	2	503	51.2	11.47	3.48	2	WIPF1	70.9	107.2	98	97.6	110.7	107.4	95	100	119.2	93.8
O43524	Forkhead box protein O3 [OS=Homo sapiens]	4	2	2	2	673	71.2	5.16	6.48	2	FOXO3	94.4	101.5	122.1	98.4	94.3	94.6	95.9	102.5	100.3	96
O43556	Epsilon-sarcoglycan [OS=Homo sapiens]	2	1	1	1	437	49.8	6.55	2.56	1	SGCE	90	57.2	62.1	102.9	79.8	80.9	120.4	130	128.4	148.2
O43566	Regulator of G-protein signaling 14 [OS=Homo sapiens]	5	1	1	1	566	61.4	8.19	3.07	1	RGS14	86.6	96.7	84.8	105.4	79.6	89.9	81.6	118.6	151.9	104.9
O43583	Density-regulated protein [OS=Homo sapiens]	42	10	42	9	198	22.1	5.3	142.35	10	DENR	95.7	98.9	103	104	102.2	98	101.6	101.3	101.1	94.3
O43592	Exportin-T [OS=Homo sapiens]	4	4	12	4	962	109.9	5.39	27.91	4	XPOT	99.7	99.2	100	107.3	101	98.1	101.2	100.9	92.5	100.1
O43597	Protein sprouty homolog 2 [OS=Homo sapiens]	12	4	7	4	315	34.7	8.35	13.41	4	SPRY2	103.1	98.3	93	99.2	111.8	96.4	97.5	89.1	96.9	114.8
O43598	2'-deoxynucleoside 5'-phosphate N-hydrolase 1 [OS=Homo sapiens]	13	2	2	2	174	19.1	5.05	2.05	2	DNPH1	92.6	97.7	116.1	103.4	70.1	86.6	109.6	91.6	110.1	122.1
O43609	Protein sprouty homolog 1 [OS=Homo sapiens]	21	4	7	4	319	35.1	8.24	23.84	4	SPRY1	115.4	119	112.5	91.6	90.1	94.2	87.7	97.3	99.5	92.7
O43615	Mitochondrial import inner membrane translocase subunit TIM44 [OS=Homo sapiens]	38	18	59	18	452	51.3	8.32	131.16	18	TIMM44	103	102.3	107.1	97.1	96.3	97.5	101.9	97.3	102.8	94.7
O43617	Trafficking protein particle complex subunit 3 [OS=Homo sapiens]	18	3	7	3	180	20.3	4.96	7.99	3	TRAPPC3	96.9	98.8	100.4	100.4	98.9	98.9	98.5	101.6	107.5	98
O43633	Charged multivesicular body protein 2a [OS=Homo sapiens]	21	5	10	5	222	25.1	5.97	21.78	5	CHMP2A	97.2	96.2	106.7	99.2	104.7	97.3	98.1	107.9	102.4	90.3
O43639	Cytoplasmic protein NCK2 [OS=Homo sapiens]	3	1	1	1	380	42.9	6.95	2.33	1	NCK2	129.1	96.7	102.6	91.7	88.5	77.9	119.2	115	88.9	90.2
O43657	Tetraspanin-6 [OS=Homo sapiens]	3	1	1	1	245	27.5	8.1	1.83	1	TSPAN6	142.6	97.6	97.8	115.6	99.4	73.1	82	74.6	88.8	128.4
O43660	Pleiotropic regulator 1 [OS=Homo sapiens]	26	10	27	10	514	57.2	9.17	74.34	10	PLRG1	92.6	107.3	104.8	95.4	92.4	104.7	104.6	104.6	98.7	94.9
O43663	Protein regulator of cytokinesis 1 [OS=Homo sapiens]	14	6	7	6	620	71.6	6.68	14.46	6	PRC1	118	115.6	116.2	82	67.8	108.4	114.6	107.2	91.2	79
O43665	Regulator of G-protein signaling 10 [OS=Homo sapiens]	28	5	22	5	181	21.2	7.49	53.4	5	RGS10	93.5	102.3	97.5	96.1	104.3	101.7	103.7	97.4	102.9	100.5
O43670	BUB3-interacting and GLEBS motif-containing protein ZNF207 [OS=Homo sapiens]	4	3	18	3	478	50.7	9.1	35.55	3	ZNF207	105.7	100.2	97.8	88.8	105.9	94.1	96.7	95.1	104	111.8
O43674	NADH dehydrogenase [ubiquinone] 1 beta subcomplex subunit 5, mitochondrial [OS=Homo sapiens]	4	1	1	1	189	21.7	9.63	2.12	1	NDUFB5	116.6	104.2	118.3	100.3	120.8	92.4	85.1	100.2	94.5	67.7
O43676	NADH dehydrogenase [ubiquinone] 1 beta subcomplex subunit 3 [OS=Homo sapiens]	11	1	3	1	98	11.4	9.2	8.14	1	NDUFB3	106.2	103.6	111.3	90.4	79	104.2	97.5	95.8	112.5	99.5
O43678	NADH dehydrogenase [ubiquinone] 1 alpha subcomplex subunit 2 [OS=Homo sapiens]	59	6	15	6	99	10.9	9.57	32.77	6	NDUFA2	103.2	113.5	99.2	94.6	88.1	103.4	99.2	97.3	103.9	97.7
O43681	ATPase GET3 [OS=Homo sapiens]	33	10	44	10	348	38.8	4.91	96.57	10	GET3	101.4	100.4	100.1	108.6	107.6	96.3	96.9	97.7	95.2	95.9
O43683	Mitotic checkpoint serine/threonine-protein kinase BUB1 [OS=Homo sapiens]	3	3	3	3	1085	122.3	6.47	4.17	3	BUB1	102.1	107.8	118	79.2	82.3	88.9	102.1	97.4	109.2	112.9
O43684	Mitotic checkpoint protein BUB3 [OS=Homo sapiens]	41	11	41	11	328	37.1	6.84	100.21	11	BUB3	102.9	87.1	106	92.9	95.1	99.2	109.9	97.6	105.4	103.9
O43688	Phospholipid phosphatase 2 [OS=Homo sapiens]	3	1	1	1	288	32.6	8.35	2.09	1	PLPP2	89.2	101.6	122.7	118.7	89.5	93.7	90.2	97	96.7	100.7
O43707	Alpha-actinin-4 [OS=Homo sapiens]	72	72	842	48	911	104.8	5.44	1990.8	72	ACTN4	102.3	103.1	102.3	94.5	96.8	100.1	98	100.6	102.5	99.7
O43708	Maleylacetoacetate isomerase [OS=Homo sapiens]	8	2	3	2	216	24.2	8.54	2.31	2	GSTZ1	101.2	103.1	93.3	104.7	94.1	102.3	91.3	95	104.6	110.4
O43709	Probable 18S rRNA (guanine-N(7))-methyltransferase [OS=Homo sapiens]	14	2	4	2	281	31.9	8.73	14.15	2	BUD23	96.3	95.9	100.3	87	82	114.6	117.9	106.5	101.1	98.4
O43715	TP53-regulated inhibitor of apoptosis 1 [OS=Homo sapiens]	46	3	4	3	76	8.8	5.48	8.9	3	TRIAP1	112.6	118	102.8	100.5	84.3	101.2	98.1	101.3	91.6	89.6
O43716	Glutamyl-tRNA(Gln) amidotransferase subunit C, mitochondrial [OS=Homo sapiens]	46	5	6	5	136	15.1	5.05	14.74	5	GATC	97.5	103.9	97.7	96.8	84.7	101.8	104.6	103.4	108.4	101.2
O43719	HIV Tat-specific factor 1 [OS=Homo sapiens]	32	24	39	24	755	85.8	4.4	69.02	24	HTATSF1	106.5	92.1	101.7	97.7	99.9	96.4	108.6	102.6	98.6	96
O43739	Cytohesin-3 [OS=Homo sapiens]	3	1	1	1	400	46.3	5.47	2.47	1	CYTH3	48.5	93.2	107.4	122.2	128.8	110.4	98.1	90.7	108.2	92.6
O43747	AP-1 complex subunit gamma-1 [OS=Homo sapiens]	10	8	14	8	822	91.3	6.8	28.19	8	AP1G1	81.9	80.2	88	92	95.4	105.3	110	113.7	107.2	126.1
O43752	Syntaxin-6 [OS=Homo sapiens]	12	2	3	2	255	29.2	4.93	8.68	2	STX6	107.7	100.8	100.9	94.3	106.8	106.3	90.1	96.8	100.8	95.5
O43765	Small glutamine-rich tetratricopeptide repeat-containing protein alpha [OS=Homo sapiens]	41	17	57	17	313	34	4.87	132.22	17	SGTA	109.8	110.1	106.9	97.2	104.1	93.6	97	93.3	93.6	94.4
O43768	Alpha-endosulfine [OS=Homo sapiens]	62	8	29	7	121	13.4	7.24	61.37	8	ENSA	108.7	102.1	109.3	108.8	105.4	92.2	99.6	95.5	95.6	82.8
O43776	Asparagine--tRNA ligase, cytoplasmic [OS=Homo sapiens]	33	16	47	16	548	62.9	6.25	98.49	16	NARS1	104.6	91.2	101.6	102.5	109.9	95.5	99.4	94.5	100.7	100.1
O43795	Unconventional myosin-Ib [OS=Homo sapiens]	12	11	16	10	1136	131.9	9.38	34.12	11	MYO1B	121.1	100	114.8	100.2	111.5	85.6	91.6	89.1	93.4	92.7
O43805	Microtubule nucleation factor SSNA1 [OS=Homo sapiens]	29	3	11	3	119	13.6	5.38	18.12	3	SSNA1	86	100.2	99.6	103.3	99.6	101.1	98.6	107.4	95.7	108.5
O43809	Cleavage and polyadenylation specificity factor subunit 5 [OS=Homo sapiens]	28	7	38	7	227	26.2	8.82	86.03	7	NUDT21	103.3	92.5	101.7	97	90.9	103.4	110.8	107.4	96.6	96.4
O43813	Glutathione S-transferase LANCL1 [OS=Homo sapiens]	13	5	7	5	399	45.3	7.75	9.21	5	LANCL1	100.4	101.1	98.5	105.1	97.5	99.8	110.3	99.3	99.8	88.4
O43815	Striatin [OS=Homo sapiens]	18	9	13	9	780	86.1	5.27	34.36	9	STRN	96.7	95	99.4	102.5	99.3	102.4	95.7	98.7	102.9	107.3
O43818	U3 small nucleolar RNA-interacting protein 2 [OS=Homo sapiens]	21	11	23	10	475	51.8	7.85	41.92	11	RRP9	94.6	112.8	94.2	95.8	90.6	110.8	102	107.2	92.6	99.4
O43819	Protein SCO2 homolog, mitochondrial [OS=Homo sapiens]	15	4	4	4	266	29.8	8.85	11.42	4	SCO2	103.3	118.1	98.6	101.4	94.9	100.6	96.3	93	99.7	94
O43823	A-kinase anchor protein 8 [OS=Homo sapiens]	25	13	20	13	692	76.1	5.15	45.85	13	AKAP8	98.3	108.6	102.9	101.2	88.1	104.8	101.1	106.5	95.6	92.9
O43826	Glucose-6-phosphate exchanger SLC37A4 [OS=Homo sapiens]	2	1	2	1	429	46.3	8.62	3.66	1	SLC37A4	133.8	103.7	112.5	94.4	96.9	97.8	90.9	94.6	105.9	69.6
O43829	Zinc finger and BTB domain-containing protein 14 [OS=Homo sapiens]	7	3	5	3	449	50.9	6.04	10.8	3	ZBTB14	95.8	104.2	94.8	93.9	89.1	109.1	105.5	106	103.9	97.7
O43837	Isocitrate dehydrogenase [NAD] subunit beta, mitochondrial [OS=Homo sapiens]	22	7	10	7	385	42.2	8.46	18.2	7	IDH3B	80.8	106.2	92.2	105.3	98.7	108.5	104.9	100.4	96.6	106.5
O43847	Nardilysin [OS=Homo sapiens]	20	19	48	19	1151	131.6	4.98	114.88	19	NRDC	88.6	90.2	95.5	100	105.3	105	107.8	105.3	98	104.3
O43852	Calumenin [OS=Homo sapiens]	57	19	140	19	315	37.1	4.64	304.38	19	CALU	97.5	95.7	99.4	99.5	98	102.5	102.5	100.1	104.1	100.7
O43854	EGF-like repeat and discoidin I-like domain-containing protein 3 [OS=Homo sapiens]	21	8	15	8	480	53.7	7.28	30.48	8	EDIL3	89.9	76.5	84.7	104.7	106.9	94.1	93.7	93.5	130.9	125.2
O43865	S-adenosylhomocysteine hydrolase-like protein 1 [OS=Homo sapiens]	25	14	42	6	530	58.9	6.89	71.2	14	AHCYL1	98.5	101.2	99	110.4	114.1	94.1	96.3	91.9	101	93.5
O43896	Kinesin-like protein KIF1C [OS=Homo sapiens]	11	9	12	5	1103	122.9	6.9	22.88	9	KIF1C	103.6	100.7	99.3	108.4	90	108.4	110.2	87.9	104.3	87.2
O43913	Origin recognition complex subunit 5 [OS=Homo sapiens]	6	3	3	3	435	50.3	7.74	5.27	3	ORC5	111.7	93.4	104.8	92.5	101.7	94.9	112.9	104.8	93.2	90.1
O43920	NADH dehydrogenase [ubiquinone] iron-sulfur protein 5 [OS=Homo sapiens]	41	4	7	4	106	12.5	9.14	17.38	4	NDUFS5	100.3	93.1	102.8	101.1	109.7	92.2	98.5	99.4	97	106
O43924	Retinal rod rhodopsin-sensitive cGMP 3',5'-cyclic phosphodiesterase subunit delta [OS=Homo sapiens]	13	1	3	1	150	17.4	5.67	8.7	1	PDE6D	81.5	72.1	99.9	88.3	116.2	106.9	130.7	96.8	110.2	97.3
O43933	Peroxisome biogenesis factor 1 [OS=Homo sapiens]	1	1	1	1	1283	142.8	6.33	3.24	1	PEX1	93.5	93.4	103.5	103.8	89.6	104.6	120.3	97.7	97.5	96.2
O60216	Double-strand-break repair protein rad21 homolog [OS=Homo sapiens]	39	18	41	18	631	71.6	4.65	115.86	18	RAD21	97.7	100.6	103.9	91.4	86.4	106.5	102.3	106.9	103.2	100.9
O60220	Mitochondrial import inner membrane translocase subunit Tim8 A [OS=Homo sapiens]	34	3	10	3	97	11	5.16	22.04	3	TIMM8A	112.3	119.9	110	104.5	100.2	92.9	94.1	89.5	92.7	83.8
O60231	Pre-mRNA-splicing factor ATP-dependent RNA helicase DHX16 [OS=Homo sapiens]	17	18	27	18	1041	119.2	6.8	55.17	18	DHX16	105.1	104.5	97.8	98.3	98.5	103.9	100.6	102.7	95.7	92.9
O60232	Protein ZNRD2 [OS=Homo sapiens]	41	4	13	4	199	21.5	5.24	47.18	4	ZNRD2	95	105.2	102	104.7	103.9	100	97.2	97.2	97.8	97.1
O60239	SH3 domain-binding protein 5 [OS=Homo sapiens]	3	1	1	1	455	50.4	4.97	0	1	SH3BP5	99.3	83.4	111.2	107.8	117.3	120.6	103.5	97.7	92	67.2
O60244	Mediator of RNA polymerase II transcription subunit 14 [OS=Homo sapiens]	4	4	4	4	1454	160.5	8.73	7.69	4	MED14	98	84.6	107.1	93.6	68	103.5	96	111.7	113.5	124
O60256	Phosphoribosyl pyrophosphate synthase-associated protein 2 [OS=Homo sapiens]	37	11	38	9	369	40.9	7.44	99.82	11	PRPSAP2	97.3	98.7	96.7	103	103.5	100.8	99.7	98.8	102.8	98.6
O60264	SWI/SNF-related matrix-associated actin-dependent regulator of chromatin subfamily A member 5 [OS=Homo sapiens]	37	35	79	28	1052	121.8	8.09	171.1	35	SMARCA5	99.6	99.1	102.8	95.1	87.4	105	108.4	103.9	98.2	100.6
O60271	C-Jun-amino-terminal kinase-interacting protein 4 [OS=Homo sapiens]	35	41	79	41	1321	146.1	5.15	190.5	41	SPAG9	93.6	96.9	93.1	119.5	121.7	91.8	93.2	94	97.6	98.5
O60281	Zinc finger protein 292 [OS=Homo sapiens]	4	8	8	8	2723	304.6	7.39	21.63	8	ZNF292	91.1	94.6	103.3	85.4	74.8	114.6	112	116.9	104.1	103.2
O60287	Nucleolar pre-ribosomal-associated protein 1 [OS=Homo sapiens]	2	4	7	4	2271	254.2	6.47	15.51	4	URB1	82.3	83.5	106.2	84	70.5	107.4	116.3	114	131.2	104.5
O60292	Signal-induced proliferation-associated 1-like protein 3 [OS=Homo sapiens]	9	11	11	10	1781	194.5	8.32	37.89	11	SIPA1L3	112.6	114.6	113.2	92.4	90.9	95.1	106.9	96.2	90.8	87.2
O60293	Zinc finger C3H1 domain-containing protein [OS=Homo sapiens]	7	11	11	11	1989	226.2	8.13	25.77	11	ZFC3H1	111.7	91.9	101.4	98.4	102.1	95.9	107.6	99.7	93.2	98
O60294	tRNA wybutosine-synthesizing protein 4 [OS=Homo sapiens]	5	3	5	3	686	75.6	6.73	13.2	3	LCMT2	103	114.5	108.7	101.9	108.9	102.6	95.1	97.3	91.3	76.8
O60306	RNA helicase aquarius [OS=Homo sapiens]	6	7	18	7	1485	171.2	6.37	40.67	7	AQR	93.8	103.4	104.9	96.6	94.2	107.5	108.3	106.2	92.8	92.2
O60307	Microtubule-associated serine/threonine-protein kinase 3 [OS=Homo sapiens]	1	1	1	1	1309	143	8.06	2.5	1	MAST3	92.3	100.1	81.4	117.9	115.4	111.6	93.6	115.3	83.4	89.1
O60313	Dynamin-like 120 kDa protein, mitochondrial [OS=Homo sapiens]	12	9	19	9	960	111.6	7.87	48.24	9	OPA1	96.8	104.9	108.3	95.5	98.3	91.3	97.2	97	100	110.5
O60318	Germinal-center associated nuclear protein [OS=Homo sapiens]	4	6	12	6	1980	218.3	6.39	35.87	6	MCM3AP	99	90.4	95.3	93	92	101.2	104.8	103.5	115.7	105.2
O60333	Kinesin-like protein KIF1B [OS=Homo sapiens]	8	11	19	7	1816	204.3	5.6	38.74	11	KIF1B	104	101.5	99.2	112.4	123	89.9	94.2	85.8	99	91.1
O60336	Mitogen-activated protein kinase-binding protein 1 [OS=Homo sapiens]	1	1	2	1	1514	163.7	6.76	2.62	1	MAPKBP1	74.8	62.8	102.9	87.4	118	109.7	100.7	106.6	106.4	130.7
O60341	Lysine-specific histone demethylase 1A [OS=Homo sapiens]	30	15	39	15	852	92.8	6.52	100.9	15	KDM1A	100.2	94.7	104	90.5	115.9	100.6	104.7	99.4	95.1	94.9
O60343	TBC1 domain family member 4 [OS=Homo sapiens]	10	11	16	11	1298	146.5	7.01	26.46	11	TBC1D4	93	88.8	93	100.7	101.4	99.9	104.6	104.3	106.6	107.9
O60353	Frizzled-6 [OS=Homo sapiens]	7	3	3	3	706	79.2	7.96	3.12	3	FZD6	112.8	84.5	96.4	110.5	92.9	113.2	98.4	101.7	95.4	94.2
O60427	Acyl-CoA (8-3)-desaturase [OS=Homo sapiens]	2	1	4	1	444	51.9	8.87	9.53	1	FADS1	104.8	92.9	111.6	83.4	70.5	115.3	103.5	116.3	103	98.8
O60437	Periplakin [OS=Homo sapiens]	19	31	43	31	1756	204.6	5.6	96.87	31	PPL	115.5	108.7	112.9	110.8	86.6	89.5	82.7	95.5	105.4	92.4
O60443	Gasdermin-E [OS=Homo sapiens]	22	10	17	10	496	54.5	5.17	41.25	10	GSDME	94.5	84.6	97.9	106.3	101.9	99.3	105.9	105.6	100.7	103.3
O60447	Ecotropic viral integration site 5 protein homolog [OS=Homo sapiens]	3	3	4	3	810	92.9	6.1	8.44	3	EVI5	97.2	97.1	107	109.6	100.6	105.4	91.2	98.8	95.4	97.6
O60462	Neuropilin-2 [OS=Homo sapiens]	2	2	2	2	931	104.8	5.17	4.42	2	NRP2	108.6	104.9	106	110.7	106.4	92.3	106.5	88.9	84.1	91.6
O60488	Long-chain-fatty-acid--CoA ligase 4 [OS=Homo sapiens]	45	24	87	22	711	79.1	8.38	215.6	24	ACSL4	100	91.8	98.5	95.8	92.8	101.1	105.2	104.1	103.1	107.5
O60493	Sorting nexin-3 [OS=Homo sapiens]	56	7	25	6	162	18.8	8.66	54.95	7	SNX3	98.2	100.3	102.5	101.3	100.2	102.3	99.8	99.3	98	98.2
O60499	Syntaxin-10 [OS=Homo sapiens]	6	1	1	1	249	28.1	4.89	3.32	1	STX10	100.3	77.8	115.4	94.7	120.5	88.9	94.2	99.7	88.1	120.4
O60502	Protein O-GlcNAcase [OS=Homo sapiens]	28	22	51	21	916	102.8	4.91	106.66	22	OGA	88.7	95.2	88.6	107.6	101.2	106.3	97.5	106.6	101.5	106.7
O60504	Vinexin [OS=Homo sapiens]	6	4	5	4	671	75.3	9.45	6.98	4	SORBS3	102.4	105	111.2	109.6	100.2	96.7	94.6	98.4	88.5	93.4
O60506	Heterogeneous nuclear ribonucleoprotein Q [OS=Homo sapiens]	56	31	208	21	623	69.6	8.59	553.82	31	SYNCRIP	101.3	97.8	100.4	99.4	93.6	102.2	104.6	103.4	97	100.2
O60508	Pre-mRNA-processing factor 17 [OS=Homo sapiens]	12	5	6	5	579	65.5	7.06	14.55	5	CDC40	106.6	99.2	94.9	98.7	87.7	106.6	102.2	104	96.1	103.9
O60524	Ribosome quality control complex subunit NEMF [OS=Homo sapiens]	16	16	27	16	1076	122.9	6.35	48.02	16	NEMF	96.1	106.7	104.5	103.8	103.6	97.8	99.3	96.1	94.4	97.8
O60547	GDP-mannose 4,6 dehydratase [OS=Homo sapiens]	29	9	25	9	372	41.9	7.31	68.17	9	GMDS	93.1	93.7	92.2	104.2	104.3	100.6	104.3	100.2	105.6	101.8
O60551	Glycylpeptide N-tetradecanoyltransferase 2 [OS=Homo sapiens]	8	4	8	4	498	56.9	7.58	15.13	4	NMT2	95.3	109.6	98.4	93.5	107.5	92	106.1	104.9	103.3	89.4
O60563	Cyclin-T1 [OS=Homo sapiens]	10	6	7	6	726	80.6	8.78	10.84	6	CCNT1	86.1	81.9	84.1	109.7	124.2	90.9	118.6	95.6	98.5	110.6
O60566	Mitotic checkpoint serine/threonine-protein kinase BUB1 beta [OS=Homo sapiens]	6	6	6	6	1050	119.5	5.27	10.06	6	BUB1B	106.4	104.5	118.4	90.2	101.1	97.7	104.6	102.5	96.1	78.6
O60568	Multifunctional procollagen lysine hydroxylase and glycosyltransferase LH3 [OS=Homo sapiens]	23	14	34	14	738	84.7	6.05	67.2	14	PLOD3	110.3	98.8	109.8	92.6	92	103.6	99.7	92.4	101.9	98.8
O60573	Eukaryotic translation initiation factor 4E type 2 [OS=Homo sapiens]	19	5	11	5	245	28.3	8.88	20.03	5	EIF4E2	69.4	90.2	95.8	115.3	100.6	115.6	106.2	109.7	82.8	114.3
O60583	Cyclin-T2 [OS=Homo sapiens]	4	2	2	2	730	81	8.92	2.1	2	CCNT2	115.1	98.7	91.5	88.2	124.8	85.5	90.5	102	94.5	109.2
O60603	Toll-like receptor 2 [OS=Homo sapiens]	2	1	1	1	784	89.8	6.61	2.03	1	TLR2	62.5	116.6	78.2	88.4	93.1	116.1	109.3	109.8	102.5	123.6
O60610	Protein diaphanous homolog 1 [OS=Homo sapiens]	24	34	95	34	1272	141.3	5.41	213.56	34	DIAPH1	98.2	97.9	101.8	104.6	109.4	96.6	101	97.4	94	99.1
O60613	Selenoprotein F [OS=Homo sapiens]	37	6	16	6	165	18.1	5.03	38.34	6	SELENOF	99.7	104.2	106.1	94	98.2	103.2	96.9	93.7	102.3	101.8
O60645	Exocyst complex component 3 [OS=Homo sapiens]	10	5	6	5	745	85.5	6.29	12.26	5	EXOC3	110.1	87.6	104.9	103	109.8	96.1	99	96.2	98.8	94.6
O60664	Perilipin-3 [OS=Homo sapiens]	72	27	214	27	434	47	5.44	591.31	27	PLIN3	92.2	97.1	97.5	107.7	104.2	98.4	95.4	100	105.8	101.7
O60669	Monocarboxylate transporter 2 [OS=Homo sapiens]	8	6	7	6	478	52.2	9.31	9.5	6	SLC16A7	138.7	124.4	101.2	89.1	110.4	94.4	85.7	75.9	76.4	103.8
O60671	Cell cycle checkpoint protein RAD1 [OS=Homo sapiens]	6	2	2	2	282	31.8	4.83	1.82	2	RAD1	121.1	99	117.7	100.5	88	96.7	104.8	97.5	93.5	81.4
O60678	Protein arginine N-methyltransferase 3 [OS=Homo sapiens]	16	7	14	7	531	59.9	5.35	28.47	7	PRMT3	101.4	91.6	101	102.2	103.8	98.4	107.8	100.5	97.3	96
O60684	Importin subunit alpha-7 [OS=Homo sapiens]	38	17	41	12	536	60	4.98	83.21	17	KPNA6	98.9	92.1	93.9	99.6	102.9	101.2	102.7	103.5	99.4	105.8
O60701	UDP-glucose 6-dehydrogenase [OS=Homo sapiens]	42	16	40	16	494	55	7.12	114.96	16	UGDH	91.4	92.1	91.4	115.2	128.4	91.7	92.3	90.6	103.7	103.2
O60711	Leupaxin [OS=Homo sapiens]	30	9	19	9	386	43.3	6.01	32.33	9	LPXN	97.3	102.7	96.7	110.7	103.6	97.3	91.7	100.6	94.6	104.6
O60716	Catenin delta-1 [OS=Homo sapiens]	35	23	70	23	968	108.1	6.23	195.63	23	CTNND1	103.3	101.7	103.4	102.5	109.5	94.2	93.5	91.8	103.2	96.8
O60749	Sorting nexin-2 [OS=Homo sapiens]	30	15	37	14	519	58.4	5.12	71.81	15	SNX2	97.4	105.6	99.5	92.9	98.5	99.3	96.6	98.7	110.3	101.1
O60762	Dolichol-phosphate mannosyltransferase subunit 1 [OS=Homo sapiens]	12	3	8	3	260	29.6	9.57	15.64	3	DPM1	107.5	91.5	108	91.4	87.8	98.1	114.6	105.9	88.9	106.2
O60763	General vesicular transport factor p115 [OS=Homo sapiens]	30	26	63	26	962	107.8	4.91	153.59	26	USO1	96.6	94.3	99.2	106	104.9	97.1	101.4	99.7	102.2	98.5
O60783	28S ribosomal protein S14, mitochondrial [OS=Homo sapiens]	19	2	8	2	128	15.1	11.41	26.21	2	MRPS14	105	92.2	114.1	102.3	93.3	93.4	100.1	85.9	107.4	106.3
O60784	Target of Myb protein 1 [OS=Homo sapiens]	11	5	6	5	492	53.8	4.7	11.52	5	TOM1	93.7	96.8	89.9	113.5	117.6	97.4	89.6	95.4	104.2	101.9
O60812	Heterogeneous nuclear ribonucleoprotein C-like 1 [OS=Homo sapiens]	26	11	87	1	293	32.1	5.06	168.85	11	HNRNPCL1	85	100.7	94.7	86.4	84.1	102.6	101.1	106	124.8	114.6
O60825	6-phosphofructo-2-kinase/fructose-2,6-bisphosphatase 2 [OS=Homo sapiens]	8	2	3	2	505	58.4	8.38	9.41	2	PFKFB2	86.8	90.2	115.3	130.3	91	122.2	85.9	73	93.3	111.9
O60826	Coiled-coil domain-containing protein 22 [OS=Homo sapiens]	19	9	17	9	627	70.7	6.74	40.71	9	CCDC22	95	102.5	92.8	111.1	101.7	93.7	97.5	100.6	100.7	104.5
O60828	Polyglutamine-binding protein 1 [OS=Homo sapiens]	36	9	25	9	265	30.5	6.33	59.48	9	PQBP1	100.7	103.7	104.4	99.3	95.8	102.1	101.7	104.4	95.1	92.8
O60831	PRA1 family protein 2 [OS=Homo sapiens]	6	1	2	1	178	19.2	9.19	5.14	1	PRAF2	96.4	121.9	101.9	102.8	95.6	98.5	97	98.7	94.3	92.9
O60832	H/ACA ribonucleoprotein complex subunit DKC1 [OS=Homo sapiens]	34	16	58	16	514	57.6	9.42	122.91	16	DKC1	98.6	104.3	102.9	95.6	87.8	104.8	108	105.8	93.5	98.8
O60841	Eukaryotic translation initiation factor 5B [OS=Homo sapiens]	33	38	92	37	1220	138.7	5.49	187.39	38	EIF5B	99.1	104.7	102.1	101.6	100.6	100.1	101.3	99.9	96.1	94.4
O60869	Endothelial differentiation-related factor 1 [OS=Homo sapiens]	39	9	35	9	148	16.4	9.95	49.56	9	EDF1	95.1	108.3	101.1	98.2	94.9	98.6	100.4	100.3	102	101.2
O60870	DNA/RNA-binding protein KIN17 [OS=Homo sapiens]	18	7	9	7	393	45.3	8.95	22.28	7	KIN	99.7	112.7	94.8	95.8	89.4	103.6	106.6	108.2	90.5	98.8
O60879	Protein diaphanous homolog 2 [OS=Homo sapiens]	7	8	8	8	1101	125.5	6.58	12.5	8	DIAPH2	93.8	104.1	105.8	97.1	96.3	96.9	103.8	101.2	100.6	100.2
O60884	DnaJ homolog subfamily A member 2 [OS=Homo sapiens]	25	7	32	7	412	45.7	6.48	41.75	7	DNAJA2	100.2	105.6	102.5	100	99.2	99.9	99.9	96.9	100.3	95.4
O60885	Bromodomain-containing protein 4 [OS=Homo sapiens]	16	21	37	19	1362	152.1	9.19	53.22	21	BRD4	93.5	99.6	100.1	96.5	92.3	106.5	97.4	111	98.4	104.7
O60888	Protein CutA [OS=Homo sapiens]	22	3	5	3	179	19.1	5.5	11.08	3	CUTA	85.7	87.5	110.6	105.2	158.7	94	77.4	90.5	87.7	102.8
O60921	Checkpoint protein HUS1 [OS=Homo sapiens]	14	3	4	3	280	31.7	6.84	10.96	3	HUS1	89.9	107.8	90.4	91.4	110.7	107.3	94.1	108.6	108.6	91.2
O60925	Prefoldin subunit 1 [OS=Homo sapiens]	48	8	22	8	122	14.2	6.81	31.6	8	PFDN1	99.8	103.3	97.2	103.5	107.4	96.2	98.2	94.6	101.9	97.9
O60927	E3 ubiquitin-protein ligase PPP1R11 [OS=Homo sapiens]	40	3	3	3	126	13.9	7.01	5.32	3	PPP1R11	105.5	116.9	88.1	88.6	129	87.5	95.1	78.9	108.6	101.9
O60934	Nibrin [OS=Homo sapiens]	23	13	22	13	754	84.9	6.9	56.58	13	NBN	95.5	99.7	102.5	103.1	97.1	106.5	97.8	104.2	94.3	99.5
O60936	Nucleolar protein 3 [OS=Homo sapiens]	40	6	15	6	208	22.6	4.18	45.23	6	NOL3	87.3	89.5	89.9	100.4	97.7	102.2	106.2	107.1	112.4	107.3
O60942	mRNA-capping enzyme [OS=Homo sapiens]	16	9	10	9	597	68.5	8.13	11.56	9	RNGTT	108.8	98.5	92.1	90.6	112.2	105.9	104.5	93.9	97.9	95.7
O75027	Iron-sulfur clusters transporter ABCB7, mitochondrial [OS=Homo sapiens]	8	4	6	4	752	82.6	9.33	11.42	4	ABCB7	91.6	124.3	118.7	100	92.8	102.7	102.6	92.4	92	83
O75044	SLIT-ROBO Rho GTPase-activating protein 2 [OS=Homo sapiens]	17	16	23	14	1071	120.8	6.7	55.12	16	SRGAP2	96.8	100.7	99.8	98.2	107.9	95	98.7	100.9	101.3	100.7
O75051	Plexin-A2 [OS=Homo sapiens]	1	2	2	1	1894	211	6.48	4.64	2	PLXNA2	115.4	89.3	87.4	107.2	110.7	114.7	83.3	94.9	94.5	102.7
O75083	WD repeat-containing protein 1 [OS=Homo sapiens]	59	32	224	32	606	66.2	6.65	600.6	32	WDR1	106.4	107.6	106.7	114.6	115	89.9	89.3	90.2	91.7	88.6
O75084	Frizzled-7 [OS=Homo sapiens]	3	2	2	1	574	63.6	7.81	4.17	2	FZD7	78.4	123	107.4	123.1	67.1	97.3	101.5	106.5	69	126.6
O75113	NEDD4-binding protein 1 [OS=Homo sapiens]	4	3	3	3	896	100.3	5.36	5.95	3	N4BP1	108	112	88.1	100.8	85.6	103	101.1	109.3	84.2	107.8
O75116	Rho-associated protein kinase 2 [OS=Homo sapiens]	32	42	93	39	1388	160.8	6.02	184.43	42	ROCK2	98.6	100	96.9	98.2	102.3	100.2	101.8	98.3	103.7	100
O75122	CLIP-associating protein 2 [OS=Homo sapiens]	26	26	48	23	1294	141	8.4	114.4	26	CLASP2	100.7	103.8	100.5	100.9	101.1	99	102.2	99.1	99.2	93.4
O75127	Pentatricopeptide repeat-containing protein 1, mitochondrial [OS=Homo sapiens]	4	3	3	3	700	78.8	8.59	4.44	3	PTCD1	117.6	78.4	88.9	92.6	85.2	110.9	104.9	103.2	102.8	115.5
O75131	Copine-3 [OS=Homo sapiens]	41	19	49	19	537	60.1	5.85	119.3	19	CPNE3	102.1	91.5	98.4	104.4	105.5	98.1	101.1	102.8	96.7	99.2
O75143	Autophagy-related protein 13 [OS=Homo sapiens]	10	3	3	3	517	56.5	5.12	11.07	3	ATG13	96.3	115.5	109.2	107.6	107.3	108.3	92.8	70	100.9	92.2
O75146	Huntingtin-interacting protein 1-related protein [OS=Homo sapiens]	16	16	24	16	1068	119.3	6.67	48.68	16	HIP1R	114.5	97.8	109.8	106.4	106.8	97.8	91.8	89.1	91.5	94.6
O75147	Obscurin-like protein 1 [OS=Homo sapiens]	3	5	7	5	1896	206.8	5.63	16.89	5	OBSL1	104.1	95.5	102.7	87.6	90.5	101.7	106.1	106.1	100.1	105.5
O75150	E3 ubiquitin-protein ligase BRE1B [OS=Homo sapiens]	29	27	41	23	1001	113.6	6.29	88.6	27	RNF40	102.3	101.1	99.7	101.8	94.8	99.8	101.9	99.6	101.5	97.5
O75151	Lysine-specific demethylase PHF2 [OS=Homo sapiens]	4	4	5	3	1096	120.7	9.17	11.18	4	PHF2	85.5	92.3	107.8	97.5	84.5	103.9	106.6	112	107.1	102.9
O75152	Zinc finger CCCH domain-containing protein 11A [OS=Homo sapiens]	23	17	30	17	810	89.1	8.37	51.49	17	ZC3H11A	102.6	104.8	105.4	91.1	81.9	107.4	104.7	111.6	96.8	93.6
O75153	Clustered mitochondria protein homolog [OS=Homo sapiens]	19	20	52	20	1309	146.6	6.13	126.81	20	CLUH	103.2	95.7	103.5	93.7	102	96	101.2	95.5	100.7	108.5
O75157	TSC22 domain family protein 2 [OS=Homo sapiens]	12	7	18	3	780	79.2	5.02	31.75	7	TSC22D2	100.4	85.8	104.3	105.2	112.9	97.4	103.5	92.5	101	97
O75165	DnaJ homolog subfamily C member 13 [OS=Homo sapiens]	5	8	9	8	2243	254.3	6.74	14.89	8	DNAJC13	99.9	97	101.7	99.1	105.3	104.5	104.4	100.9	91.6	95.6
O75167	Phosphatase and actin regulator 2 [OS=Homo sapiens]	9	5	7	5	634	69.7	8.16	11.56	5	PHACTR2	96	88.1	116.5	99.9	119.3	111.7	96.5	98.8	83.9	89.2
O75170	Serine/threonine-protein phosphatase 6 regulatory subunit 2 [OS=Homo sapiens]	7	4	4	4	966	104.9	4.87	9.04	4	PPP6R2	105.4	92.8	109.7	107.2	98.6	107.1	90.5	92.7	95.8	100.1
O75175	CCR4-NOT transcription complex subunit 3 [OS=Homo sapiens]	15	11	17	10	753	81.8	6.2	39.28	11	CNOT3	89.2	97.1	94.2	103.8	96	103	107.9	103	104.2	101.5
O75177	Calcium-responsive transactivator [OS=Homo sapiens]	6	2	2	2	396	43	6.44	4.75	2	SS18L1	93.1	120.7	98.5	92.2	93.1	95.5	94.2	110.9	97.1	104.8
O75179	Ankyrin repeat domain-containing protein 17 [OS=Homo sapiens]	15	29	43	18	2603	274.1	6.52	93.57	29	ANKRD17	92.6	98	102.5	99.5	95.4	107.4	104.6	104.3	100.2	95.4
O75182	Paired amphipathic helix protein Sin3b [OS=Homo sapiens]	5	6	7	6	1162	133	6.93	15.04	6	SIN3B	108.1	100.5	94.3	96.8	95.7	101.5	87.5	102.8	105.1	107.6
O75190	DnaJ homolog subfamily B member 6 [OS=Homo sapiens]	30	10	23	9	326	36.1	9.16	48.86	10	DNAJB6	96.9	95	105.6	86.3	92.7	98.6	116.3	104.9	97.2	106.5
O75191	Xylulose kinase [OS=Homo sapiens]	15	5	5	5	536	58.3	5.86	8.62	5	XYLB	77.3	104.8	87.9	98.4	85	115	99.4	116.9	113.3	102
O75197	Low-density lipoprotein receptor-related protein 5 [OS=Homo sapiens]	4	5	7	5	1615	179	5.34	16.65	5	LRP5	95.7	81.8	102.9	104.9	97.8	97.6	88.8	86.5	121.8	122.3
O75208	Ubiquinone biosynthesis protein COQ9, mitochondrial [OS=Homo sapiens]	19	5	8	5	318	35.5	5.94	24.09	5	COQ9	95.7	94.8	85.7	86.1	86.7	108.9	114.7	108.8	116.2	102.4
O75223	Gamma-glutamylcyclotransferase [OS=Homo sapiens]	66	12	30	12	188	21	5.14	64.18	12	GGCT	103.7	97	98.9	100.9	100.5	100.2	105.4	100.7	95.5	97.3
O75251	NADH dehydrogenase [ubiquinone] iron-sulfur protein 7, mitochondrial [OS=Homo sapiens]	18	4	7	4	213	23.5	9.99	10.95	4	NDUFS7	102.3	99	101.4	95.2	79.5	103.6	101.7	101.9	107.4	108
O75306	NADH dehydrogenase [ubiquinone] iron-sulfur protein 2, mitochondrial [OS=Homo sapiens]	9	2	3	2	463	52.5	7.55	8.39	2	NDUFS2	90.5	86.6	97.2	97.4	87.2	109.1	109.9	97.6	113.5	110.9
O75312	Zinc finger protein ZPR1 [OS=Homo sapiens]	47	20	67	20	459	50.9	4.73	143.86	20	ZPR1	108.2	114.6	106.4	114.3	122.5	90.8	87.5	85.4	83.4	87
O75323	Protein NipSnap homolog 2 [OS=Homo sapiens]	3	1	2	1	286	33.7	9.36	2.71	1	NIPSNAP2	93.5	102.9	110.3	92.7	84.8	104.2	98.1	106.6	101.3	105.5
O75326	Semaphorin-7A [OS=Homo sapiens]	13	8	11	8	666	74.8	7.64	27.79	8	SEMA7A	114.3	111.2	107.7	104.9	91.6	99.8	105.2	90.7	88.4	86.2
O75340	Programmed cell death protein 6 [OS=Homo sapiens]	32	4	18	4	191	21.9	5.4	52.83	4	PDCD6	86.4	94.9	87	109.5	91.1	104.7	103.7	108.4	108.2	106
O75347	Tubulin-specific chaperone A [OS=Homo sapiens]	70	18	84	18	108	12.8	5.29	145.49	18	TBCA	100.4	106.4	101.3	106.4	108.8	94.1	98.1	93.3	97.6	93.6
O75348	V-type proton ATPase subunit G 1 [OS=Homo sapiens]	31	4	8	4	118	13.7	8.79	13.86	4	ATP6V1G1	83.1	92.1	87.5	88.5	94	83.6	85.8	128.4	83.6	173.5
O75351	Vacuolar protein sorting-associated protein 4B [OS=Homo sapiens]	15	5	15	4	444	49.3	7.23	27.66	5	VPS4B	82.5	90.4	104.6	100.3	108.1	104.9	98.9	100.3	105	104.9
O75362	Zinc finger protein 217 [OS=Homo sapiens]	11	9	14	8	1048	115.2	8.48	23.43	9	ZNF217	96.7	102.8	105.4	91.2	93.4	106.8	109	107.2	97	90.7
O75367	Core histone macro-H2A.1 [OS=Homo sapiens]	43	14	99	14	372	39.6	9.79	239.88	14	H2afy; H2AFY; LOC100466888; LOC101338325; LOC101381952; LOC101564704; LOC102987354; LOC103079324; LOC103663804; LOC105869993; LOC106989149; LOC110591142; LOC111141291; LOC111182462; LOC112404331; LOC112625777; LOC112815157; LOC112861289; LOC112917035; LOC113928700; LOC114891795; LOC115516119; LOC116529369; LOC116750637; MACROH2A1	107.1	101.7	106.6	95	89.9	99.7	101.5	98.1	100.4	99.9
O75368	SH3 domain-binding glutamic acid-rich-like protein [OS=Homo sapiens]	43	6	20	6	114	12.8	5.25	48.46	6	SH3BGRL	78.4	80.7	83.4	106.9	90.5	123.2	110.5	127.7	105.4	93.3
O75369	Filamin-B [OS=Homo sapiens]	76	179	1528	163	2602	278	5.73	3968.47	179	FLNB	94.8	98.5	94.9	101.5	106.9	99.8	98.8	101.5	100.6	102.5
O75376	Nuclear receptor corepressor 1 [OS=Homo sapiens]	12	25	37	25	2440	270	7.11	78.4	25	NCOR1	92	99.9	100.5	94.5	90.9	103.8	104.8	105.1	104.5	104
O75379	Vesicle-associated membrane protein 4 [OS=Homo sapiens]	14	3	3	3	141	16.4	7.34	4.15	3	VAMP4	111.7	103.8	107.7	91.5	97.2	95.8	101	81.7	115.8	93.9
O75380	NADH dehydrogenase [ubiquinone] iron-sulfur protein 6, mitochondrial [OS=Homo sapiens]	50	4	11	4	124	13.7	8.28	19.52	4	NDUFS6	95.7	100.6	107.2	99.6	75.5	108.4	100.5	102	104.6	105.8
O75381	Peroxisomal membrane protein PEX14 [OS=Homo sapiens]	20	8	16	8	377	41.2	4.94	29.61	8	PEX14	114.8	107.6	107.9	108.8	105.6	91.3	93.3	92.9	83.4	94.2
O75382	Tripartite motif-containing protein 3 [OS=Homo sapiens]	6	3	3	3	744	80.8	7.83	4.36	3	TRIM3	93.3	104.9	92.3	96.6	117.3	105.7	82.8	108.9	94.1	104.1
O75386	Tubby-related protein 3 [OS=Homo sapiens]	2	1	1	1	442	49.6	7.74	0	1	TULP3	148.7	90.1	119.1	100.8	82.3	94.2	103.5	96.9	75	89.4
O75390	Citrate synthase, mitochondrial [OS=Homo sapiens]	24	14	79	14	466	51.7	8.32	138.94	14	CS	102.3	96.4	102.2	97.9	88.3	105.6	102.4	102.4	101.6	100.8
O75391	Sperm-associated antigen 7 [OS=Homo sapiens]	32	6	14	6	227	26	7.91	26.52	6	SPAG7	106	104.4	107.3	105.8	102.6	95.1	101.3	100.7	91.2	85.7
O75396	Vesicle-trafficking protein SEC22b [OS=Homo sapiens]	41	9	27	9	215	24.7	8.51	73.74	9	SEC22B	98.5	98.3	99.2	106.1	97.9	101.2	98	97.1	101.3	102.5
O75398	Deformed epidermal autoregulatory factor 1 homolog [OS=Homo sapiens]	2	1	1	1	565	59.3	5.34	0	1	DEAF1	93.5	118.7	130.3	87.1	87	113.4	84.9	110.8	82.6	91.9
O75400	Pre-mRNA-processing factor 40 homolog A [OS=Homo sapiens]	19	17	60	17	957	108.7	7.56	129.91	17	PRPF40A	99.4	99.4	98.4	99.4	91.5	103.6	107.4	105.4	96.3	99.1
O75410	Transforming acidic coiled-coil-containing protein 1 [OS=Homo sapiens]	31	20	33	17	805	87.7	4.88	78.05	20	TACC1	100.5	104.2	100.5	98.4	91.3	102.9	104.5	101.8	100.5	95.4
O75414	Nucleoside diphosphate kinase 6 [OS=Homo sapiens]	25	3	5	3	186	21.1	8.32	2.93	3	NME6	101.4	99.5	98.8	106.2	84.3	98.8	99.1	104.1	106.7	101.1
O75419	Cell division control protein 45 homolog [OS=Homo sapiens]	1	1	1	1	566	65.5	5.53	2.17	1	CDC45	136	88.6	105.6	78.2	97	96.4	136.4	84.5	87.6	89.8
O75420	GRB10-interacting GYF protein 1 [OS=Homo sapiens]	6	5	6	5	1035	114.5	5.39	12.98	5	GIGYF1	76.5	113.3	99.7	109.5	109.1	109.2	86.1	96.7	101.9	97.8
O75427	Leucine-rich repeat and calponin homology domain-containing protein 4 [OS=Homo sapiens]	23	10	16	10	683	73.4	8.22	34.87	10	LRCH4	95.3	90.5	91.9	90.3	98.3	105.7	100.5	104.1	112.1	111.3
O75431	Metaxin-2 [OS=Homo sapiens]	24	6	10	6	263	29.7	6.29	24.63	6	MTX2	107.8	96.3	99.5	104.5	90.4	96	101.9	101.5	97.1	104.9
O75436	Vacuolar protein sorting-associated protein 26A [OS=Homo sapiens]	22	6	19	6	327	38.1	6.57	51.9	6	VPS26A	93.7	98.5	100.6	102.5	100.4	96.4	97	105.7	103.6	101.6
O75439	Mitochondrial-processing peptidase subunit beta [OS=Homo sapiens]	24	9	22	9	489	54.3	6.83	63.96	9	PMPCB	97.5	95	96.9	95.4	94.6	105	103.6	99	109.1	104.1
O75448	Mediator of RNA polymerase II transcription subunit 24 [OS=Homo sapiens]	13	11	13	11	989	110.2	6.95	27.23	11	MED24	107.2	95.7	99.3	98.8	98	100.5	107.8	108	103.1	81.7
O75449	Katanin p60 ATPase-containing subunit A1 [OS=Homo sapiens]	5	3	6	3	491	55.9	6.9	4.24	3	KATNA1	97.4	102.1	95.8	114	63.2	96.8	114.8	96.8	112	107.1
O75475	PC4 and SFRS1-interacting protein [OS=Homo sapiens]	57	31	60	30	530	60.1	9.13	138.27	31	PSIP1	98.9	103.2	105.8	97.2	87.5	102.6	102.7	102.8	100.1	99.2
O75477	Erlin-1 [OS=Homo sapiens]	30	11	25	9	348	39.1	7.87	58.51	11	ERLIN1	132.6	118.7	123.7	81.9	105.2	83.2	84.4	81.6	90.1	98.7
O75489	NADH dehydrogenase [ubiquinone] iron-sulfur protein 3, mitochondrial [OS=Homo sapiens]	38	8	17	8	264	30.2	7.5	42.44	8	NDUFS3	102	97.2	102.1	95.6	88.4	100.2	103.3	99.2	100.3	111.7
O75494	Serine/arginine-rich splicing factor 10 [OS=Homo sapiens]	28	9	27	9	262	31.3	11.27	60.86	9	SRSF10	96	98.6	101.6	89.3	80.4	106.8	109.2	108.4	106.6	103.2
O75496	Geminin [OS=Homo sapiens]	16	3	3	3	209	23.6	4.96	5	3	GMNN	99	112.9	86.7	100.2	102.1	90.6	89.8	110.6	118.6	89.5
O75521	Enoyl-CoA delta isomerase 2 [OS=Homo sapiens]	31	8	26	8	394	43.6	9	76.74	8	ECI2	97.1	98.7	99.4	92.1	98.1	101.4	98.9	96.5	109	108.7
O75525	KH domain-containing, RNA-binding, signal transduction-associated protein 3 [OS=Homo sapiens]	17	6	19	5	346	38.8	7.61	28.92	6	KHDRBS3	117.3	108.8	119.3	105.3	90.1	90.2	106.7	90.9	87.5	83.8
O75530	Polycomb protein EED [OS=Homo sapiens]	11	4	7	4	441	50.2	7.03	11.26	4	EED	106.1	108.8	115.7	102.9	96.6	87.6	103.8	102.1	84.3	92.2
O75531	Barrier-to-autointegration factor [OS=Homo sapiens]	63	7	43	7	89	10.1	6.09	70.41	7	BANF1	97.1	102	104.3	93.6	95.5	101.4	99.6	100.1	100.7	105.5
O75533	Splicing factor 3B subunit 1 [OS=Homo sapiens]	30	35	111	35	1304	145.7	7.09	326.52	35	SF3B1	94.4	99.1	97.5	97.9	90.4	105.9	102.3	107.5	102.5	102.7
O75534	Cold shock domain-containing protein E1 [OS=Homo sapiens]	30	25	84	25	798	88.8	6.25	208.04	25	CSDE1	103.4	101.4	101.2	97.4	97.4	101.5	104.1	100.5	97.1	96
O75554	WW domain-binding protein 4 [OS=Homo sapiens]	16	5	11	5	376	42.5	5.57	25.4	5	WBP4	105	113.1	108.4	104.8	88.5	99.5	97.3	97.9	92.9	92.5
O75569	Interferon-inducible double-stranded RNA-dependent protein kinase activator A [OS=Homo sapiens]	11	3	5	3	313	34.4	8.41	11.01	3	PRKRA	104.5	92.7	105.7	103.6	102.1	101.2	104.7	88.2	111.1	86.3
O75575	DNA-directed RNA polymerase III subunit RPC9 [OS=Homo sapiens]	5	1	1	1	148	16.9	5.39	2.12	1	CRCP	96.8	109.7	104	94.1	107.2	91.6	99.2	92.5	97.3	107.7
O75581	Low-density lipoprotein receptor-related protein 6 [OS=Homo sapiens]	1	2	2	2	1613	180.3	5.31	4.02	2	LRP6	105.7	86.4	103.2	116.4	98.4	94.7	94.8	94.6	97.5	108.3
O75582	Ribosomal protein S6 kinase alpha-5 [OS=Homo sapiens]	7	5	6	5	802	89.8	7.11	7.31	5	RPS6KA5	96.7	106	105.9	114.7	107.7	92	94.7	92.6	86.2	103.6
O75592	E3 ubiquitin-protein ligase MYCBP2 [OS=Homo sapiens]	6	23	29	23	4678	513.3	7.02	59.3	23	MYCBP2	79.1	86.8	93.1	92.8	93.3	115.2	109.2	108.9	112.7	108.8
O75607	Nucleoplasmin-3 [OS=Homo sapiens]	47	6	20	6	178	19.3	4.63	63.14	6	NPM3	101.5	102.4	100.5	93.6	90.3	106	105.6	105.2	97.9	96.9
O75608	Acyl-protein thioesterase 1 [OS=Homo sapiens]	26	6	12	6	230	24.7	6.77	18.11	6	LYPLA1	97.8	106.1	97.8	116.8	96.9	106.9	93.5	98.9	90.5	94.8
O75616	GTPase Era, mitochondrial [OS=Homo sapiens]	8	3	4	3	437	48.3	8.84	8.17	3	ERAL1	93.5	114.2	100.4	87.5	68.4	126.7	101.2	99.4	109.4	99.3
O75643	U5 small nuclear ribonucleoprotein 200 kDa helicase [OS=Homo sapiens]	18	41	110	41	2136	244.4	6.06	239.58	41	SNRNP200	98.6	95.5	97.5	95.2	97.3	103.5	105.6	105.6	98.5	102.9
O75648	Mitochondrial tRNA-specific 2-thiouridylase 1 [OS=Homo sapiens]	3	1	1	1	421	47.7	8.03	0	1	TRMU	122.1	108.8	100	80.9	98.6	87.6	103.7	91.7	102.3	104.4
O75663	TIP41-like protein [OS=Homo sapiens]	33	9	20	9	272	31.4	5.91	35	9	TIPRL	90.6	93.7	98.7	100.6	104.7	95	92.2	103.7	102.2	118.8
O75665	Centriole and centriolar satellite protein OFD1 [OS=Homo sapiens]	2	2	2	1	1012	116.6	6.1	2.04	2	OFD1	109.3	98.2	116.3	82.5	94.3	109.6	87.4	94.9	98.8	108.7
O75674	TOM1-like protein 1 [OS=Homo sapiens]	5	1	3	1	476	53	5.24	12.75	1	TOM1L1	132.6	86.1	71.1	131.1	57.2	118.3	111.1	78.3	116.2	98.2
O75676	Ribosomal protein S6 kinase alpha-4 [OS=Homo sapiens]	11	7	9	7	772	85.6	8.28	21.35	7	RPS6KA4	99.6	105.3	109.3	93.9	97.5	106.3	96.8	100	90.5	100.8
O75683	Surfeit locus protein 6 [OS=Homo sapiens]	36	11	17	11	361	41.4	10.64	37.08	11	SURF6	104.3	114.5	98.6	97.1	95.3	103.2	99.9	105.2	95.4	86.6
O75688	Protein phosphatase 1B [OS=Homo sapiens]	36	15	25	14	479	52.6	5.05	55.37	15	PPM1B	95.4	98.2	94.6	98.4	104.2	102.3	100.1	94.2	108.3	104.2
O75691	Small subunit processome component 20 homolog [OS=Homo sapiens]	6	13	20	13	2785	318.2	7.39	51.08	13	UTP20	101.7	109.6	102.7	87	85.6	110	113.9	103.9	94.3	91.3
O75694	Nuclear pore complex protein Nup155 [OS=Homo sapiens]	12	13	24	13	1391	155.1	6.16	67.88	13	NUP155	116.9	108.1	105.5	90.5	98.4	92.8	97.1	93.3	96.5	100.8
O75717	WD repeat and HMG-box DNA-binding protein 1 [OS=Homo sapiens]	41	37	86	37	1129	125.9	5.62	202.76	37	WDHD1	102.6	105.3	105.8	94.1	95.8	100.8	107.5	101.5	94.3	92.3
O75718	Cartilage-associated protein [OS=Homo sapiens]	17	7	11	7	401	46.5	5.73	13.43	7	CRTAP	114.1	104.9	100.7	96.7	75.3	105.8	100.6	94.3	104.9	102.7
O75746	Electrogenic aspartate/glutamate antiporter SLC25A12, mitochondrial [OS=Homo sapiens]	10	5	8	2	678	74.7	8.38	16.05	5	SLC25A12	97.5	117.4	127.9	77	84.5	106.6	85.6	96.8	93.4	113.3
O75764	Transcription elongation factor A protein 3 [OS=Homo sapiens]	18	5	9	5	348	38.9	9.19	20.81	5	TCEA3	107.3	102.1	106.1	103.6	95.1	94.1	92	95.4	104.7	99.7
O75787	Renin receptor [OS=Homo sapiens]	5	1	2	1	350	39	6.1	4.99	1	ATP6AP2	102.8	82.9	133.1	84.8	95.3	81.1	77.3	89.1	124.2	129.3
O75792	Ribonuclease H2 subunit A [OS=Homo sapiens]	33	8	22	8	299	33.4	5.25	49.26	8	RNASEH2A	105.9	101.8	103.6	97.2	95.1	105.3	98.6	102.6	97.3	92.6
O75794	Cell division cycle protein 123 homolog [OS=Homo sapiens]	21	6	16	6	336	39.1	4.81	35.19	6	CDC123	97.7	106.1	99.4	97.6	101.9	105	106.1	98.8	89.6	97.8
O75815	Breast cancer anti-estrogen resistance protein 3 [OS=Homo sapiens]	29	18	37	17	825	92.5	7.96	88.18	18	BCAR3	81.4	83.3	86.6	98.2	98.3	102.9	102	110.5	117.8	119.1
O75817	Ribonuclease P protein subunit p20 [OS=Homo sapiens]	11	1	3	1	140	15.6	8.94	5.17	1	POP7	93.3	99.1	103.5	91.9	111.8	103.7	98.3	103.4	96.4	98.4
O75818	Ribonuclease P protein subunit p40 [OS=Homo sapiens]	18	6	8	6	363	41.8	6.67	12.37	6	RPP40	98.4	102.6	102.1	110.5	92.4	106.4	96.3	104.7	89.6	96.8
O75821	Eukaryotic translation initiation factor 3 subunit G [OS=Homo sapiens]	57	18	65	18	320	35.6	6.13	151.09	18	EIF3G	101.7	98.8	99.4	99.2	103.1	100	103.4	100.7	96.6	97.1
O75822	Eukaryotic translation initiation factor 3 subunit J [OS=Homo sapiens]	55	13	41	13	258	29	4.83	80.93	13	EIF3J	100.6	100	100.8	103.8	100.8	99	103.1	101.7	93	97.1
O75828	Carbonyl reductase [NADPH] 3 [OS=Homo sapiens]	56	11	28	8	277	30.8	6.18	71.54	11	CBR3	96.5	102.3	98	123.1	128.8	92.3	85.1	86.9	93	94.2
O75832	26S proteasome non-ATPase regulatory subunit 10 [OS=Homo sapiens]	30	6	12	6	226	24.4	6.1	33.42	6	PSMD10	103.2	94.9	94.4	101.8	110.6	103.6	97.2	97.3	100.9	96
O75843	AP-1 complex subunit gamma-like 2 [OS=Homo sapiens]	5	4	6	4	785	87.1	6.55	10.29	4	AP1G2	91.3	98.9	124	110.1	94.9	100.3	90.4	95.7	93.6	100.7
O75844	CAAX prenyl protease 1 homolog [OS=Homo sapiens]	17	9	20	9	475	54.8	7.49	43.46	9	ZMPSTE24	98.9	97.6	100.8	97.7	87.2	104.2	108.5	101.4	102.6	101.1
O75874	Isocitrate dehydrogenase [NADP] cytoplasmic [OS=Homo sapiens]	43	20	42	20	414	46.6	7.01	78	20	IDH1	87.3	82.1	88	114.7	112	95.3	97.8	101.6	112.7	108.6
O75879	Glutamyl-tRNA(Gln) amidotransferase subunit B, mitochondrial [OS=Homo sapiens]	6	3	3	3	557	61.8	8.63	5.03	3	GATB	125.1	79.6	106.5	91.2	95.1	97	112.9	103.9	116.2	72.6
O75880	Protein SCO1 homolog, mitochondrial [OS=Homo sapiens]	5	2	3	2	301	33.8	8.88	6.43	2	SCO1	112.2	102	118.8	102.9	96.4	93.7	90.9	91.5	92.8	98.8
O75886	Signal transducing adapter molecule 2 [OS=Homo sapiens]	22	12	28	10	525	58.1	5.07	47.45	12	STAM2	102	109.3	105.1	98	99.4	95.6	97.1	99.9	95.5	98.1
O75909	Cyclin-K [OS=Homo sapiens]	6	2	3	2	580	64.2	8.41	7.61	2	CCNK	91	75.2	94.1	102	101.4	111.6	83.5	121.6	104.6	114.9
O75915	PRA1 family protein 3 [OS=Homo sapiens]	24	4	10	4	188	21.6	9.77	10.86	4	ARL6IP5	107.6	105.3	107.8	106	89	95.2	92.9	96.4	103	96.9
O75934	Pre-mRNA-splicing factor SPF27 [OS=Homo sapiens]	47	7	21	7	225	26.1	5.66	55.2	7	BCAS2	106.1	103.6	103.8	97.6	101	97.4	100.5	92.2	97	100.8
O75935	Dynactin subunit 3 [OS=Homo sapiens]	15	3	6	3	186	21.1	5.47	8.66	3	DCTN3	106.7	87.9	103.3	104.2	103.4	95.5	104.1	99.4	95.1	100.4
O75937	DnaJ homolog subfamily C member 8 [OS=Homo sapiens]	38	15	38	15	253	29.8	9.06	58.86	15	DNAJC8	93.9	92	97.4	94.8	94.2	102.9	108.2	108.1	106.5	102.1
O75940	Survival of motor neuron-related-splicing factor 30 [OS=Homo sapiens]	39	6	17	6	238	26.7	7.24	55.68	6	SMNDC1	98.7	89.7	100.8	97.6	91.8	103.8	108	102.2	106.9	100.5
O75947	ATP synthase subunit d, mitochondrial [OS=Homo sapiens]	80	11	46	11	161	18.5	5.3	120.62	11	ATP5PD	100.1	102.1	103.4	91.3	89.3	97.2	98.4	100.1	105.5	112.6
O75953	DnaJ homolog subfamily B member 5 [OS=Homo sapiens]	12	3	3	3	348	39.1	9.04	7.87	3	DNAJB5	80.6	80.5	106.8	88.1	109.6	95.7	86.5	116	135.1	101.2
O75955	Flotillin-1 [OS=Homo sapiens]	16	7	8	7	427	47.3	7.49	7.36	7	FLOT1	133.6	96.6	108	89.4	106.3	84.9	103.5	85.2	102.9	89.8
O75956	Cyclin-dependent kinase 2-associated protein 2 [OS=Homo sapiens]	6	1	3	1	126	13.1	9.48	4.52	1	CDK2AP2	90.5	100.4	112.5	101	92.8	97.7	105.6	112.8	112.4	74.2
O75962	Triple functional domain protein [OS=Homo sapiens]	6	18	22	18	3097	346.7	6.37	44.39	18	TRIO	93.9	89.9	97.8	96.7	98	103.9	103	110.1	100.2	106.4
O75964	ATP synthase subunit g, mitochondrial [OS=Homo sapiens]	48	5	16	5	103	11.4	9.64	33.17	5	ATP5MG	101.6	93.4	101.4	91.7	81.9	117.2	108.1	101.5	103.6	99.6
O75970	Multiple PDZ domain protein [OS=Homo sapiens]	4	7	9	7	2070	221.5	5.06	14.93	7	MPDZ	91.4	91.9	98.6	97.3	98.5	102.9	98	102.7	108.3	110.4
O75976	Carboxypeptidase D [OS=Homo sapiens]	12	12	12	12	1380	152.8	6.05	31.34	12	CPD	100.1	88.1	100.9	92.1	107.3	98.2	92.8	92.8	113.8	114
O76003	Glutaredoxin-3 [OS=Homo sapiens]	34	10	43	10	335	37.4	5.39	81.54	10	GLRX3	96.1	98.4	95.7	104.3	108.1	101.7	102.1	100.8	94.5	98.2
O76021	Ribosomal L1 domain-containing protein 1 [OS=Homo sapiens]	36	19	69	19	490	54.9	10.13	100.59	19	RSL1D1	103.1	108.6	103.7	101.1	92.4	102.4	104.2	99.7	91.2	93.6
O76024	Wolframin [OS=Homo sapiens]	13	8	12	8	890	100.2	8.05	25.99	8	WFS1	106.6	102.4	108.3	95	99.6	100.3	99	97.2	96.2	95.5
O76031	ATP-dependent Clp protease ATP-binding subunit clpX-like, mitochondrial [OS=Homo sapiens]	29	18	35	18	633	69.2	7.58	58.64	18	CLPX	102.8	97.1	105.5	94.7	90.7	101.6	101.8	97.8	105.3	102.7
O76054	SEC14-like protein 2 [OS=Homo sapiens]	10	3	4	3	403	46.1	7.84	4.65	3	SEC14L2	101.7	105.2	97.1	114.5	99.7	92.1	96.9	98.6	93.9	100.4
O76070	Gamma-synuclein [OS=Homo sapiens]	7	1	1	1	127	13.3	4.86	2.25	1	SNCG	100.7	115.9	112	124.1	120.2	60	58	126.3	64.7	118.1
O76071	Probable cytosolic iron-sulfur protein assembly protein CIAO1 [OS=Homo sapiens]	12	2	2	2	339	37.8	4.97	9.32	2	CIAO1	97.6	92.8	102.3	107.2	101.2	98.5	101.1	99.3	95.3	104.8
O76080	AN1-type zinc finger protein 5 [OS=Homo sapiens]	36	6	9	5	213	23.1	8.51	24.6	6	ZFAND5	98.6	93.2	97	104.1	110.5	104.8	104.5	100.7	95.7	90.9
O76094	Signal recognition particle subunit SRP72 [OS=Homo sapiens]	36	22	59	22	671	74.6	9.26	140.62	22	SRP72	97.5	96.4	102.7	97.9	96.7	103.2	103.9	102.9	98.7	100.1
O76095	Protein JTB [OS=Homo sapiens]	14	2	2	2	146	16.3	8.28	4.42	2	JTB	138.5	120.6	122	92.3	106.7	81.7	86.2	65.1	91.3	95.4
O94760	N(G),N(G)-dimethylarginine dimethylaminohydrolase 1 [OS=Homo sapiens]	56	13	68	12	285	31.1	5.81	190.47	13	DDAH1	105.7	105.2	103.7	102.9	106.9	92.1	95.8	95.7	96.4	95.7
O94762	ATP-dependent DNA helicase Q5 [OS=Homo sapiens]	5	4	5	4	991	108.8	8.56	12.87	4	RECQL5	99	91.7	96.3	96.9	92.8	106.6	103.6	103.8	96.4	112.8
O94763	Unconventional prefoldin RPB5 interactor 1 [OS=Homo sapiens]	16	8	12	8	535	59.8	5.05	24.48	8	URI1	88.7	106.5	96.5	103.8	105.9	92	101	100.1	104.2	101.4
O94776	Metastasis-associated protein MTA2 [OS=Homo sapiens]	50	31	78	29	668	75	9.66	150.75	31	MTA2	100	102	101.4	93.2	88.5	105.3	106.8	103.9	100.5	98.3
O94782	Ubiquitin carboxyl-terminal hydrolase 1 [OS=Homo sapiens]	12	9	10	9	785	88.2	5.45	19.84	9	USP1	104.7	97.6	109.3	82.8	98.9	100.5	111.1	99.4	105	90.7
O94804	Serine/threonine-protein kinase 10 [OS=Homo sapiens]	37	36	84	34	968	112.1	6.95	169.97	36	STK10	97.7	96.2	97.4	100.7	108.5	97.5	99.9	100	101.6	100.6
O94808	Glutamine--fructose-6-phosphate aminotransferase [isomerizing] 2 [OS=Homo sapiens]	21	13	29	11	682	76.9	7.37	66.98	13	GFPT2	61.6	56.4	61.6	75.4	69.5	127.7	131.1	138.1	139.6	139
O94817	Ubiquitin-like protein ATG12 [OS=Homo sapiens]	4	1	3	1	140	15.1	5.1	1.68	1	ATG12	91.9	85.7	112.9	94.3	100.9	108.1	106.4	89.4	111.3	99.3
O94822	E3 ubiquitin-protein ligase listerin [OS=Homo sapiens]	2	3	3	3	1766	200.4	6.25	8.59	3	LTN1	87	100.4	113.1	104	93.3	100.8	120.4	94	99	87.9
O94826	Mitochondrial import receptor subunit TOM70 [OS=Homo sapiens]	34	18	55	18	608	67.4	7.12	141.49	18	TOMM70	108.5	102.6	106.9	98.3	92.2	97.3	103.8	97.9	93.6	99
O94829	Importin-13 [OS=Homo sapiens]	5	3	3	3	963	108.1	5.3	8.46	3	IPO13	123.4	103.7	125.1	100.9	105.7	93.1	94.2	76.7	107.6	69.5
O94842	TOX high mobility group box family member 4 [OS=Homo sapiens]	21	10	17	9	621	66.2	5.06	48.96	10	TOX4	98	104.9	102	98.2	91.8	109.2	100	106.4	96.4	93.1
O94844	Rho-related BTB domain-containing protein 1 [OS=Homo sapiens]	2	1	1	1	696	79.4	6.87	0	1	RHOBTB1	112.1	106.1	93.4	90.6	79.2	107	95.9	104.3	103.9	107.6
O94851	[F-actin]-monooxygenase MICAL2 [OS=Homo sapiens]	8	14	27	11	1957	218.9	8.34	58.12	14	MICAL2	107.7	105.4	99.7	89.6	93.2	101.1	102.6	97.6	96.8	106.3
O94855	Protein transport protein Sec24D [OS=Homo sapiens]	15	12	41	11	1032	112.9	7.25	117.72	12	SEC24D	90.4	89.7	92.6	105.4	109.5	98.6	98.9	100.6	105.8	108.5
O94874	E3 UFM1-protein ligase 1 [OS=Homo sapiens]	12	8	15	8	794	89.5	6.79	33.73	8	UFL1	107.4	87.1	108.1	95.6	100.6	95.8	102.5	98.3	105.2	99.6
O94875	Sorbin and SH3 domain-containing protein 2 [OS=Homo sapiens]	8	7	12	7	1100	124	8.31	15.87	7	SORBS2	106.1	99.8	90.8	88	78.7	111.3	106.9	109.4	109	99.9
O94880	PHD finger protein 14 [OS=Homo sapiens]	19	13	19	13	888	100	5.33	41.63	13	PHF14	96.8	93.1	102.8	97.4	95.2	100.1	108.4	107.6	97.8	100.9
O94885	SAM and SH3 domain-containing protein 1 [OS=Homo sapiens]	6	5	5	5	1247	136.6	6.09	11.74	5	SASH1	106.7	95.2	102	117.5	113.9	87.7	93.7	85	110.3	88.1
O94888	UBX domain-containing protein 7 [OS=Homo sapiens]	27	10	25	10	489	54.8	5.16	49.99	10	UBXN7	100.3	94.2	93.7	100.2	102	101.7	101.1	101.3	101.6	103.8
O94901	SUN domain-containing protein 1 [OS=Homo sapiens]	25	13	25	12	785	87.1	6.93	86.24	13	SUN1	108.3	99.6	107	92.7	94.4	96.3	102.1	100.5	100.3	98.7
O94903	Pyridoxal phosphate homeostasis protein [OS=Homo sapiens]	17	4	6	4	275	30.3	7.5	16.62	4	PLPBP	93.2	96.6	103.8	98.2	101.1	97.1	96.4	105.9	102	105.8
O94905	Erlin-2 [OS=Homo sapiens]	32	9	18	7	339	37.8	5.62	35.81	9	ERLIN2	123.1	119	106.6	84	107.8	83.2	94.3	80	93.4	108.6
O94906	Pre-mRNA-processing factor 6 [OS=Homo sapiens]	37	34	75	34	941	106.9	8.25	129.91	34	PRPF6	102.7	102.3	98.5	96.3	90.1	105.3	108.4	103.5	96.8	96
O94913	Pre-mRNA cleavage complex 2 protein Pcf11 [OS=Homo sapiens]	7	10	13	10	1555	172.9	8.48	20.4	10	PCF11	96.9	99.4	103.1	92.8	101.5	107.3	98.8	99.7	99.9	100.6
O94915	Protein furry homolog-like [OS=Homo sapiens]	6	14	21	14	3013	339.4	5.58	51.82	14	FRYL	100.9	99.9	93.9	97.9	99.8	97	100.7	100.8	107	102.1
O94916	Nuclear factor of activated T-cells 5 [OS=Homo sapiens]	1	2	2	2	1531	165.7	5.24	4.82	2	NFAT5	79.7	76.7	96.6	87.9	87.1	112.7	101.4	104	138.9	115.1
O94919	Endonuclease domain-containing 1 protein [OS=Homo sapiens]	21	7	12	7	500	55	5.71	28.6	7	ENDOD1	113	100.5	121.4	91	107.8	91.6	87.8	85.3	106.2	95.5
O94925	Glutaminase kidney isoform, mitochondrial [OS=Homo sapiens]	16	9	24	9	669	73.4	7.77	64.7	9	GLS	102.1	95.5	100.1	93.5	89.7	104.3	105.2	103.6	106.9	99.1
O94927	HAUS augmin-like complex subunit 5 [OS=Homo sapiens]	7	4	7	4	633	71.6	8.51	20.35	4	HAUS5	99.3	94	116.7	91.8	87.4	101.2	102.8	100.5	110.2	95.9
O94929	Actin-binding LIM protein 3 [OS=Homo sapiens]	4	3	3	3	683	77.8	8.54	2.92	3	ABLIM3	90.9	89	114.4	85.7	88.3	101.6	103.4	106.5	119.2	101
O94953	Lysine-specific demethylase 4B [OS=Homo sapiens]	6	5	6	5	1096	121.8	7.09	10.39	5	KDM4B	82.6	81	96.4	101.3	101.6	105.2	94.4	117.2	118.7	101.7
O94964	Protein SOGA1 [OS=Homo sapiens]	16	17	19	17	1423	159.7	6.46	48.16	17	SOGA1	95	89.5	98.3	95.3	93.8	110.7	102.9	109.9	101.8	102.9
O94966	Ubiquitin carboxyl-terminal hydrolase 19 [OS=Homo sapiens]	17	15	21	15	1318	145.6	6.28	48.55	15	USP19	93.4	104.3	87.2	108.6	109.5	105.7	98.2	98	87.3	107.7
O94967	WD repeat-containing protein 47 [OS=Homo sapiens]	6	3	7	3	919	101.9	5.94	17.21	3	WDR47	85.2	85.2	110.1	131	98.4	97.3	86.1	93.1	96.4	117.1
O94973	AP-2 complex subunit alpha-2 [OS=Homo sapiens]	23	18	43	11	939	103.9	6.96	87.7	18	AP2A2	110.2	96	106.6	101.5	102.1	89.3	97.3	100.4	95.7	100.9
O94979	Protein transport protein Sec31A [OS=Homo sapiens]	22	24	56	24	1220	132.9	6.89	128.83	24	SEC31A	98.6	94.7	98.9	112.4	115.4	95	96.7	96.4	95.7	96.2
O94992	Protein HEXIM1 [OS=Homo sapiens]	38	10	40	9	359	40.6	4.89	93.23	10	HEXIM1	97.9	101.7	99.1	106.9	110.7	98.8	94	98.9	95.3	96.5
O95067	G2/mitotic-specific cyclin-B2 [OS=Homo sapiens]	3	1	2	1	398	45.3	8.9	4.73	1	CCNB2	102.3	106.7	92.2	95.5	71.4	117.8	96.8	119.3	79.6	118.5
O95071	E3 ubiquitin-protein ligase UBR5 [OS=Homo sapiens]	9	17	25	17	2799	309.2	5.85	62.49	17	UBR5	85.1	84.4	104.1	101.1	105.2	110.6	107.6	100.1	98.2	103.6
O95081	Arf-GAP domain and FG repeat-containing protein 2 [OS=Homo sapiens]	14	5	10	4	481	48.9	9.11	20.71	5	AGFG2	82.7	135.7	99.1	151.4	119.4	82.7	85.8	95	76.8	71.5
O95084	Serine protease 23 [OS=Homo sapiens]	12	4	6	4	383	43	9.42	11.39	4	PRSS23	128.5	131.2	120.8	118.1	95.4	75.5	76.5	76.1	85.4	92.6
O95104	SR-related and CTD-associated factor 4 [OS=Homo sapiens]	11	8	18	8	1147	125.8	9.55	33.61	8	SCAF4	97.9	99.3	98.8	95.8	89.5	103.9	110.4	102.6	97.9	103.9
O95139	NADH dehydrogenase [ubiquinone] 1 beta subcomplex subunit 6 [OS=Homo sapiens]	26	3	6	3	128	15.5	9.63	11.44	3	NDUFB6	119.4	94.6	114.1	94.8	92.4	96.7	103.8	102.4	83.3	98.4
O95149	Snurportin-1 [OS=Homo sapiens]	7	3	4	3	360	41.1	6.64	8.53	3	SNUPN	99.5	117.1	99	102.3	87.1	103.7	109.1	102.1	101.6	78.6
O95155	Ubiquitin conjugation factor E4 B [OS=Homo sapiens]	10	9	13	9	1302	146.1	6.55	28.1	9	UBE4B	104.9	94.4	102.7	108.9	112.6	95.7	101.8	91.7	99.1	88.1
O95159	Zinc finger protein-like 1 [OS=Homo sapiens]	6	2	4	2	310	34.1	8.07	6.08	2	ZFPL1	106.1	82.3	90.6	102.6	109.5	103.3	99.9	97.2	104.6	104.2
O95163	Elongator complex protein 1 [OS=Homo sapiens]	10	11	19	11	1332	150.2	5.94	51.4	11	ELP1	96.2	101.2	97.7	97.9	106.7	100.8	99.6	102.4	97.4	100.1
O95167	NADH dehydrogenase [ubiquinone] 1 alpha subcomplex subunit 3 [OS=Homo sapiens]	8	1	1	1	84	9.3	8.46	1.81	1	NDUFA3	97.3	99.9	93.9	98.3	83.8	94.9	107.5	109.4	102	113
O95168	NADH dehydrogenase [ubiquinone] 1 beta subcomplex subunit 4 [OS=Homo sapiens]	22	2	3	2	129	15.2	9.85	7.09	2	NDUFB4	116.6	100.9	127.8	86	88.9	92.9	84.4	92.4	120.4	89.7
O95169	NADH dehydrogenase [ubiquinone] 1 beta subcomplex subunit 8, mitochondrial [OS=Homo sapiens]	18	2	5	2	186	21.8	6.8	16.49	2	NDUFB8	108	112.3	100.5	85.5	87.8	105.8	87.3	112.6	104.3	96
O95182	NADH dehydrogenase [ubiquinone] 1 alpha subcomplex subunit 7 [OS=Homo sapiens]	52	5	5	5	113	12.5	10.18	4.77	5	NDUFA7	103.1	97.6	115.7	110.3	105.7	93.4	96	92.6	93.1	92.4
O95197	Reticulon-3 [OS=Homo sapiens]	3	3	5	2	1032	112.5	4.96	10.53	3	RTN3	117.4	100.2	118.9	96.9	120.1	80.6	88.3	84.1	84.5	109
O95202	Mitochondrial proton/calcium exchanger protein [OS=Homo sapiens]	18	12	31	12	739	83.3	6.7	75.13	12	LETM1	114.7	112.3	114.8	106	101.1	89.6	91.2	90	88.6	91.6
O95208	Epsin-2 [OS=Homo sapiens]	14	6	12	6	641	68.4	7.52	32.55	6	EPN2	99.2	101.4	100.3	101.3	96.1	90.5	94.1	97.7	105.6	113.8
O95210	Starch-binding domain-containing protein 1 [OS=Homo sapiens]	21	7	10	7	358	39	5.73	12.81	7	STBD1	87.9	100.1	92.4	103.6	96.8	111.4	101.1	101.4	103.9	101.5
O95218	Zinc finger Ran-binding domain-containing protein 2 [OS=Homo sapiens]	33	12	31	12	330	37.4	10.01	61.44	12	ZRANB2	93.8	103.1	100.7	109.1	101	98.1	95.3	102.2	97.2	99.5
O95229	ZW10 interactor [OS=Homo sapiens]	30	9	13	9	277	31.3	5.15	17.95	9	ZWINT	117.3	129.8	115.7	85.5	77.6	103.2	106.8	102.2	82.5	79.5
O95232	Luc7-like protein 3 [OS=Homo sapiens]	27	15	28	15	432	51.4	9.79	61.74	15	LUC7L3	102	103.5	99.5	99.6	90.8	103.8	107.6	106.8	91.2	95.2
O95235	Kinesin-like protein KIF20A [OS=Homo sapiens]	18	13	18	13	890	100.2	6.92	37.52	13	KIF20A	102.5	101.4	109	89.5	87.2	113.2	105.2	110.8	96.6	84.6
O95239	Chromosome-associated kinesin KIF4A [OS=Homo sapiens]	32	36	77	35	1232	139.8	6.27	190.55	36	KIF4A	99	105	103.3	96.4	94.8	102.3	104	102.7	92.4	100.1
O95248	Myotubularin-related protein 5 [OS=Homo sapiens]	6	7	7	7	1868	208.3	6.9	18.46	7	SBF1	95.4	89.6	91.1	105.2	88.6	105.7	101	107	105.2	111.1
O95249	Golgi SNAP receptor complex member 1 [OS=Homo sapiens]	20	5	9	5	250	28.6	9.42	14.72	5	GOSR1	107.3	98.3	89.6	88.9	85.1	106.5	108.1	103.5	104.9	107.8
O95251	Histone acetyltransferase KAT7 [OS=Homo sapiens]	10	5	6	5	611	70.6	8.85	14.29	5	KAT7	94.2	108.2	103.3	87.5	86.1	106.9	104.9	106.7	104.3	97.9
O95260	Arginyl-tRNA--protein transferase 1 [OS=Homo sapiens]	15	5	7	5	518	59.1	7.93	10.18	5	ATE1	92.3	106.3	106.2	106.5	109	98.3	96.1	100.9	95.7	88.6
O95263	High affinity cAMP-specific and IBMX-insensitive 3',5'-cyclic phosphodiesterase 8B [OS=Homo sapiens]	8	5	5	5	885	98.9	6.83	4.89	5	PDE8B	70.7	101.5	120.1	91.1	78.8	120.3	112	119	101.8	84.7
O95273	Cyclin-D1-binding protein 1 [OS=Homo sapiens]	9	3	4	3	360	40.2	4.82	7.18	3	CCNDBP1	97.1	102.8	94	103.6	116.1	98.2	87.3	87.7	119.8	93.5
O95292	Vesicle-associated membrane protein-associated protein B/C [OS=Homo sapiens]	50	13	49	12	243	27.2	7.3	98.22	13	VAPB	100.6	105.7	105.9	100.8	95.8	98.3	96.7	95.1	100.8	100.4
O95295	SNARE-associated protein Snapin [OS=Homo sapiens]	38	4	7	4	136	14.9	9.31	7.35	4	SNAPIN	91.2	101.2	110.7	107.2	92.1	101.8	95.5	98.2	108.9	93.3
O95297	Myelin protein zero-like protein 1 [OS=Homo sapiens]	19	4	6	4	269	29.1	8.72	9.83	4	MPZL1	106.2	91.2	108.5	104.3	101.3	90	88.3	94.3	102.7	113
O95298	NADH dehydrogenase [ubiquinone] 1 subunit C2 [OS=Homo sapiens]	23	3	7	3	119	14.2	8.98	17.25	3	NDUFC2	112.3	97	107.8	94.8	94.5	96.6	100.8	96	101.8	98.3
O95299	NADH dehydrogenase [ubiquinone] 1 alpha subcomplex subunit 10, mitochondrial [OS=Homo sapiens]	19	7	10	7	355	40.7	8.48	22.71	7	NDUFA10	101	105.4	100.5	96.4	93.7	99.9	102.2	96.9	107	96.9
O95302	Peptidyl-prolyl cis-trans isomerase FKBP9 [OS=Homo sapiens]	14	8	15	8	570	63	5.08	26.21	8	FKBP9	104.7	100.8	107.4	94.2	95.1	99.6	96.5	92	102.8	107
O95319	CUGBP Elav-like family member 2 [OS=Homo sapiens]	7	4	7	1	508	54.3	8.76	15.3	4	CELF2	102.5	114.4	124.7	113	89.2	94.6	98.7	86.3	90.2	86.3
O95336	6-phosphogluconolactonase [OS=Homo sapiens]	66	13	67	13	258	27.5	6.05	171.89	13	PGLS	91.4	96.5	96.8	103.1	102	100.4	98	98.9	107.2	105.9
O95340	Bifunctional 3'-phosphoadenosine 5'-phosphosulfate synthase 2 [OS=Homo sapiens]	32	18	66	16	614	69.5	8.03	148.42	18	PAPSS2	97	101.3	95.6	104.1	105.9	101.2	99.6	100.9	98.4	96
O95347	Structural maintenance of chromosomes protein 2 [OS=Homo sapiens]	42	57	170	56	1197	135.6	8.43	325.06	57	SMC2	103.5	104.9	104.9	94.8	96.7	99.8	101.8	100.8	97.3	95.5
O95352	Ubiquitin-like modifier-activating enzyme ATG7 [OS=Homo sapiens]	9	4	8	4	703	77.9	6.24	12.8	4	ATG7	89.6	81.5	117.1	89.1	102.2	103.7	92.8	95.6	107.7	120.8
O95359	Transforming acidic coiled-coil-containing protein 2 [OS=Homo sapiens]	7	18	28	15	2948	309.2	4.79	53.53	18	TACC2	97.7	99.1	102.1	102.9	102.3	97.2	96.9	100.5	102.8	98.6
O95361	Tripartite motif-containing protein 16 [OS=Homo sapiens]	9	3	5	3	564	63.9	5.49	5.11	3	TRIM16	74	85.8	56.4	113.3	103	108	88.3	98.5	119	153.8
O95363	Phenylalanine--tRNA ligase, mitochondrial [OS=Homo sapiens]	2	1	3	1	451	52.3	7.46	0	1	FARS2	110.2	84.3	106.5	105.6	103.3	110.4	86.3	115.4	101.1	76.7
O95365	Zinc finger and BTB domain-containing protein 7A [OS=Homo sapiens]	24	7	13	7	584	61.4	5.19	43.68	7	ZBTB7A	88.4	92.2	97.7	91.6	92.4	111.8	102.2	108.7	104.9	110.2
O95372	Acyl-protein thioesterase 2 [OS=Homo sapiens]	23	5	25	5	231	24.7	7.23	45.25	5	LYPLA2	90.5	94.3	96.5	96	100.8	103.7	101.3	104.6	109.2	103.1
O95373	Importin-7 [OS=Homo sapiens]	19	18	70	17	1038	119.4	4.82	171.62	18	IPO7	100.7	101.3	101.9	100.8	102.8	101.2	99.6	97.8	96.7	97.3
O95376	E3 ubiquitin-protein ligase ARIH2 [OS=Homo sapiens]	15	6	8	6	493	57.8	5.63	20.49	6	ARIH2	93.6	104.7	96.8	107.9	99.8	93.6	105.7	99.3	95.1	103.5
O95379	Tumor necrosis factor alpha-induced protein 8 [OS=Homo sapiens]	4	1	1	1	198	23	7.93	2.54	1	TNFAIP8	108.3	106.3	100.3	101	105.8	92	113.1	91.9	91.8	89.5
O95391	Pre-mRNA-splicing factor SLU7 [OS=Homo sapiens]	24	11	18	11	586	68.3	7.14	37.3	11	SLU7	96	107.6	97	99.7	85.3	106.4	103.1	112.7	97.3	94.8
O95394	Phosphoacetylglucosamine mutase [OS=Homo sapiens]	21	10	29	10	542	59.8	6.25	65.19	10	PGM3	97.2	101.2	88.4	105.7	106.6	99.3	95.2	100.3	102.7	103.4
O95396	Adenylyltransferase and sulfurtransferase MOCS3 [OS=Homo sapiens]	15	4	8	4	460	49.6	6.21	26.58	4	MOCS3	91.1	95.8	105.6	100.5	103.4	109	91.3	96.9	101.9	104.5
O95400	CD2 antigen cytoplasmic tail-binding protein 2 [OS=Homo sapiens]	42	9	21	9	341	37.6	4.61	71.31	9	CD2BP2	91.2	101.1	100.2	95.9	82.1	113	109.5	106.8	106.3	93.8
O95425	Supervillin [OS=Homo sapiens]	16	30	47	30	2214	247.6	6.98	112.57	30	SVIL	113.1	106.8	111.4	104.3	98	91.2	90.9	93.8	96.8	93.6
O95429	BAG family molecular chaperone regulator 4 [OS=Homo sapiens]	5	2	3	2	457	49.6	5.12	5.57	2	BAG4	106.3	109	98.2	109.4	94.8	94.4	107.4	92.8	94.3	93.4
O95433	Activator of 90 kDa heat shock protein ATPase homolog 1 [OS=Homo sapiens]	62	20	71	20	338	38.3	5.53	143.22	20	AHSA1	102.3	97.1	99.9	102.3	113.3	94.4	100.4	97.9	97	95.4
O95453	Poly(A)-specific ribonuclease PARN [OS=Homo sapiens]	16	8	14	8	639	73.4	6.2	22.56	8	PARN	104.1	108.1	105	99.4	99.4	97.4	94.9	96.6	98.6	96.5
O95456	Proteasome assembly chaperone 1 [OS=Homo sapiens]	15	6	15	6	288	32.8	7.17	18.71	6	PSMG1	95	117.4	93.2	101.2	97.9	101.9	99.4	103.9	99.6	90.4
O95466	Formin-like protein 1 [OS=Homo sapiens]	16	17	27	15	1100	121.8	5.72	52.81	17	FMNL1	93.9	86.4	91.5	92.6	97.9	107.1	106.5	109.7	109.5	104.9
O95470	Sphingosine-1-phosphate lyase 1 [OS=Homo sapiens]	6	3	6	3	568	63.5	9.16	12.5	3	SGPL1	97.1	102.1	101	106.6	95.3	98.1	106.4	106.3	88.1	98.9
O95478	Ribosome biogenesis protein NSA2 homolog [OS=Homo sapiens]	32	7	13	7	260	30	10.27	26.01	7	NSA2	99.8	108.4	102.3	98.7	83.9	108	111.7	100.3	92.2	94.6
O95479	GDH/6PGL endoplasmic bifunctional protein [OS=Homo sapiens]	4	3	3	3	791	88.8	7.3	2.49	3	H6PD	92.1	86.4	84.3	106.5	97.5	98.1	87	107.2	127.7	113.2
O95486	Protein transport protein Sec24A [OS=Homo sapiens]	9	7	12	6	1093	119.7	7.66	29.22	7	SEC24A	96.1	92.8	100	101.6	102.7	102.2	99.3	101.1	102.3	101.9
O95487	Protein transport protein Sec24B [OS=Homo sapiens]	18	15	24	14	1268	137.3	6.67	46.82	15	SEC24B	101.2	95.1	102.1	103.5	98	102.5	100.7	101.5	94.2	101.2
O95503	Chromobox protein homolog 6 [OS=Homo sapiens]	10	2	4	2	412	43.9	10.01	7.2	2	CBX6	77	116.6	92.3	97.7	109.3	100.9	105.1	108.1	106.4	86.6
O95544	NAD kinase [OS=Homo sapiens]	7	2	2	2	446	49.2	6.47	5.92	2	NADK	84.4	123.6	132.2	116.4	134.7	74.7	88	86.8	82.4	76.8
O95551	Tyrosyl-DNA phosphodiesterase 2 [OS=Homo sapiens]	12	3	5	3	362	40.9	5.1	10.7	3	TDP2	104.7	111.7	109.1	89.3	103.3	95.2	98.4	103.4	89.1	95.8
O95562	Vesicle transport protein SFT2B [OS=Homo sapiens]	7	2	2	2	160	17.8	9.13	4.24	2	SFT2D2	102.5	87.3	102	105.7	102.8	103.9	93.2	89.7	107.2	105.8
O95568	Histidine protein methyltransferase 1 homolog [OS=Homo sapiens]	10	2	2	2	372	42.1	6.76	7.09	2	METTL18	139.7	112.3	90.7	98.2	105.3	110.2	87.1	78.8	66.1	111.8
O95571	Persulfide dioxygenase ETHE1, mitochondrial [OS=Homo sapiens]	28	6	18	6	254	27.9	6.83	54.7	6	ETHE1	92.1	98.9	98.3	96	95.2	105.1	100.5	104.1	105.8	103.9
O95573	Fatty acid CoA ligase Acsl3 [OS=Homo sapiens]	32	17	74	15	720	80.4	8.38	197.91	17	ACSL3	98.8	92.1	98.4	98.7	92.5	102.8	99.8	103.4	103.4	110
O95602	DNA-directed RNA polymerase I subunit RPA1 [OS=Homo sapiens]	20	22	30	22	1720	194.7	7.03	82.55	22	POLR1A	100.2	99.5	98.4	98	95.1	102.6	106.5	100.8	93.9	105
O95613	Pericentrin [OS=Homo sapiens]	5	14	15	14	3336	377.8	5.55	37.07	14	PCNT	111	108.8	107	101.3	91.6	85.8	97.1	103.4	97.6	96.3
O95619	YEATS domain-containing protein 4 [OS=Homo sapiens]	10	3	3	3	227	26.5	8.41	2.42	3	YEATS4	98.8	114.7	107.8	111.9	80.8	94.2	100.6	101.3	94.6	95.4
O95625	Zinc finger and BTB domain-containing protein 11 [OS=Homo sapiens]	6	7	7	7	1053	119.3	8.66	17.79	7	ZBTB11	108.6	97.9	103.3	92	106.5	99.3	106.2	98	89.8	98.3
O95628	CCR4-NOT transcription complex subunit 4 [OS=Homo sapiens]	7	3	5	3	575	63.5	7.03	9.42	3	CNOT4	104.5	95.2	98.6	111.4	92.8	92.3	98.4	136	75	95.8
O95630	STAM-binding protein [OS=Homo sapiens]	22	10	17	10	424	48	6.29	29.7	10	STAMBP	101	99.8	97.4	102.5	98.6	99.8	98.5	99.8	104.2	98.2
O95639	Cleavage and polyadenylation specificity factor subunit 4 [OS=Homo sapiens]	21	4	11	4	269	30.2	8.31	21.19	4	CPSF4	97.8	108.8	100	101.7	86.8	102.6	106.7	97	100	98.8
O95671	Probable bifunctional dTTP/UTP pyrophosphatase/methyltransferase protein [OS=Homo sapiens]	6	3	4	3	621	68.8	6.07	11.31	3	ASMTL	77	80.5	79.8	84.8	97.6	102.6	94	116.6	119.3	147.7
O95674	Phosphatidate cytidylyltransferase 2 [OS=Homo sapiens]	9	4	6	4	445	51.4	7.09	10.38	4	CDS2	96	102.3	95.8	102.2	98.7	102.2	93.9	112.8	99.4	96.7
O95684	Centrosomal protein 43 [OS=Homo sapiens]	8	2	4	2	399	43	4.81	16.11	2	CEP43	90.3	104.4	97	94	104.8	104.4	97.8	110.2	100.4	96.7
O95685	Protein phosphatase 1 regulatory subunit 3D [OS=Homo sapiens]	10	2	2	2	299	32.5	8.07	0	2	PPP1R3D	123.7	82.8	104.5	114.6	101.8	105.7	88.1	101.9	110.1	66.6
O95696	Bromodomain-containing protein 1 [OS=Homo sapiens]	2	3	4	2	1058	119.4	8.6	2.3	3	BRD1	92.4	108.5	101.9	77.8	119.3	104.2	122.5	102.6	90.6	80.2
O95707	Ribonuclease P protein subunit p29 [OS=Homo sapiens]	10	2	10	2	220	25.4	10.07	18.11	2	POP4	97.2	92.8	105.4	93.6	90.3	102.1	112.6	103	110.3	92.7
O95714	E3 ubiquitin-protein ligase HERC2 [OS=Homo sapiens]	4	19	24	19	4834	526.9	6.28	52.39	19	HERC2	104.5	99.8	105.2	103.3	104.4	95.5	99.5	89.6	98.8	99.3
O95721	Synaptosomal-associated protein 29 [OS=Homo sapiens]	53	12	26	12	258	29	5.81	56.91	12	SNAP29	102.8	104.9	106.1	104.5	103.5	98.8	94.2	97.3	97.3	90.7
O95747	Serine/threonine-protein kinase OSR1 [OS=Homo sapiens]	38	15	49	13	527	58	6.43	121.03	15	OXSR1	97.3	94.2	97.2	104.4	126.3	95.1	98.5	97	96.3	93.7
O95749	Geranylgeranyl pyrophosphate synthase [OS=Homo sapiens]	6	2	3	2	300	34.8	6.14	5.7	2	GGPS1	77.2	91.9	114.5	133.2	105.7	96.7	99.5	83	119	79.3
O95757	Heat shock 70 kDa protein 4L [OS=Homo sapiens]	48	35	132	31	839	94.5	5.88	316.27	35	HSPA4L	100.7	106.4	103.7	113	112.8	93	91.8	93.8	93.2	91.5
O95758	Polypyrimidine tract-binding protein 3 [OS=Homo sapiens]	12	7	28	4	552	59.7	9.04	50.86	7	PTBP3	92.2	106.5	107.6	98.2	91.9	97.2	111.7	103.6	98	93.2
O95777	U6 snRNA-associated Sm-like protein LSm8 [OS=Homo sapiens]	61	4	16	4	96	10.4	4.48	54.92	4	LSM8	99.6	91.8	105.2	95.8	100	99.1	98.4	100.9	106.9	102.4
O95782	AP-2 complex subunit alpha-1 [OS=Homo sapiens]	36	29	85	22	977	107.5	7.03	196.3	29	AP2A1	109.8	98.2	103.1	95.6	102.9	95.2	94.7	100.7	100.8	99
O95785	Protein Wiz [OS=Homo sapiens]	7	8	15	8	1651	178.6	6.86	23.23	8	WIZ	91.8	105.3	102.6	87.8	90.4	107.1	101.5	102.2	100.5	110.8
O95786	Antiviral innate immune response receptor RIG-I [OS=Homo sapiens]	10	7	9	7	925	106.5	6.4	17.41	7	RIGI	102.1	98.4	90.9	118.8	134.3	86.9	85.2	91	100.9	91.5
O95793	Double-stranded RNA-binding protein Staufen homolog 1 [OS=Homo sapiens]	39	24	65	21	577	63.1	9.44	137.81	24	STAU1	102.6	103.1	104.3	99.3	95.2	103.6	101.1	100.5	95.9	94.2
O95801	Tetratricopeptide repeat protein 4 [OS=Homo sapiens]	30	9	16	9	387	44.7	5.6	29.49	9	TTC4	86.7	104.4	92.9	103.2	96.8	105.8	108.1	99.7	102.2	100.2
O95810	Caveolae-associated protein 2 [OS=Homo sapiens]	36	12	26	12	425	47.1	5.21	68.4	12	CAVIN2	125.4	117.8	110.5	104.3	111.5	80.4	78	86	89.6	96.6
O95816	BAG family molecular chaperone regulator 2 [OS=Homo sapiens]	45	11	40	11	211	23.8	6.7	97.06	11	BAG2	109.8	104.8	101.8	108.9	109.7	92.6	92.2	90.1	91.1	99
O95817	BAG family molecular chaperone regulator 3 [OS=Homo sapiens]	49	22	56	22	575	61.6	6.95	138.01	22	BAG3	95.8	102.2	101.1	106.1	106.8	99	99	99.6	98.4	91.9
O95819	Mitogen-activated protein kinase kinase kinase kinase 4 [OS=Homo sapiens]	7	7	11	7	1239	142	7.46	36.89	7	MAP4K4	101.7	97	100.9	99.6	118.6	84.4	93.6	90.2	107.8	106
O95825	Quinone oxidoreductase-like protein 1 [OS=Homo sapiens]	17	5	7	5	349	38.7	5.78	12.79	5	CRYZL1	102.7	94	98.6	99.8	106.7	100.3	103	98.4	102.3	94.2
O95831	Apoptosis-inducing factor 1, mitochondrial [OS=Homo sapiens]	37	17	63	17	613	66.9	8.95	140.76	17	AIFM1	113.4	103.9	109.6	97	97.3	88.4	93.1	94.4	97.1	105.7
O95833	Chloride intracellular channel protein 3 [OS=Homo sapiens]	42	8	11	8	236	26.6	6.43	23.63	8	CLIC3	90.1	103.1	96.5	110.8	106.2	96.5	92.9	103.5	98.7	101.6
O95834	Echinoderm microtubule-associated protein-like 2 [OS=Homo sapiens]	14	7	10	7	649	70.6	6.32	22.02	7	EML2	101	100.3	102.9	105	104.6	100.2	102	93.1	96.1	94.8
O95861	3'(2'),5'-bisphosphate nucleotidase 1 [OS=Homo sapiens]	51	13	34	13	308	33.4	5.69	77.97	13	BPNT1	98.7	102.1	94.8	103.8	108.5	98.2	95	98.1	103.1	97.7
O95864	Acyl-CoA 6-desaturase [OS=Homo sapiens]	15	6	14	6	444	52.2	8.82	29.05	6	FADS2	106.6	75	102.3	91.3	91.5	104.6	101.6	103.8	112.9	110.6
O95865	N(G),N(G)-dimethylarginine dimethylaminohydrolase 2 [OS=Homo sapiens]	54	10	34	9	285	29.6	6.01	96.35	10	DDAH2	97.4	101.6	104.5	104.9	108.8	94.1	89.1	95.1	103.6	100.9
O95881	Thioredoxin domain-containing protein 12 [OS=Homo sapiens]	40	6	20	6	172	19.2	5.4	48.96	6	TXNDC12	100.2	110	100.3	92.1	93.7	104.8	95.6	97.3	100.9	105.2
O95905	Protein ecdysoneless homolog [OS=Homo sapiens]	6	2	2	2	644	72.7	4.87	6.44	2	ECD	99.2	113.6	116.5	96.4	101.1	115	92.5	103.4	101.8	60.4
O95983	Methyl-CpG-binding domain protein 3 [OS=Homo sapiens]	14	4	6	4	291	32.8	5.34	8.58	4	MBD3	118.6	101.1	109.7	83.7	88.9	100.5	104.3	99.1	100.4	93.7
O95985	DNA topoisomerase 3-beta-1 [OS=Homo sapiens]	8	4	6	4	862	96.6	8.12	21.44	4	TOP3B	102.1	97.2	98.6	100.5	94.7	108.6	99.4	102.5	91.7	104.5
O95989	Diphosphoinositol polyphosphate phosphohydrolase 1 [OS=Homo sapiens]	15	3	3	2	172	19.5	6.34	7.64	3	NUDT3	105.4	96.5	91	107.2	107.3	95.9	96	104.9	91.3	104.5
O95994	Anterior gradient protein 2 homolog [OS=Homo sapiens]	16	2	5	2	175	20	9	13.26	2	AGR2	141.1	102.4	124	127.5	123.5	73.3	71.1	72.7	78.2	86.2
O95997	Securin [OS=Homo sapiens]	11	2	2	2	202	22	6.6	4.56	2	PTTG1	118.5	110.4	121	72.3	80.7	119.2	104	112.3	83.7	77.9
O95999	B-cell lymphoma/leukemia 10 [OS=Homo sapiens]	32	8	12	8	233	26.2	5.74	22.85	8	BCL10	99.4	101.7	102.5	99.3	111.8	91.3	97.2	93	102.3	101.5
O96000	NADH dehydrogenase [ubiquinone] 1 beta subcomplex subunit 10 [OS=Homo sapiens]	26	5	9	5	172	20.8	8.48	16.35	5	NDUFB10	116.6	102.4	113.7	101.5	105.5	86.2	100.9	96.8	85.9	90.5
O96005	Putative lipid scramblase CLPTM1 [OS=Homo sapiens]	8	4	7	4	669	76	6.3	20.88	4	CLPTM1	132.8	104.3	112.1	78.8	105.9	95.5	83.5	81.5	95.6	110
O96007	Molybdopterin synthase catalytic subunit [OS=Homo sapiens]	28	5	14	5	188	20.9	5.44	41.53	5	MOCS2	107	88.1	102.5	101.6	109.2	99.4	99.4	99.9	95.9	97.1
O96008	Mitochondrial import receptor subunit TOM40 homolog [OS=Homo sapiens]	27	5	13	5	361	37.9	7.25	34.35	5	TOMM40	119.9	102.4	113.5	85	102.3	97.2	95.5	93.9	95.5	94.5
O96013	Serine/threonine-protein kinase PAK 4 [OS=Homo sapiens]	24	10	23	10	591	64	9.73	48.21	10	PAK4	97.5	98.2	101.4	98.1	96.9	100.3	108.8	103.7	100.1	95.1
O96017	Serine/threonine-protein kinase Chk2 [OS=Homo sapiens]	7	2	2	2	543	60.9	5.91	7.4	2	CHEK2	135.9	148.4	91	88.6	79.2	95.7	93.9	102.5	99.5	65.2
O96018	Amyloid-beta A4 precursor protein-binding family A member 3 [OS=Homo sapiens]	2	1	1	1	575	61.4	4.94	1.95	1	APBA3	119.5	93.7	90.6	97.9	89.8	98.8	88.4	108.9	109.2	103.1
O96019	Actin-like protein 6A [OS=Homo sapiens]	33	12	32	12	429	47.4	5.6	67.02	12	ACTL6A	100	98.8	98.1	97.9	99.2	103.7	104.2	101.9	97.8	98.5
O96028	Histone-lysine N-methyltransferase NSD2 [OS=Homo sapiens]	22	25	31	25	1365	152.2	8.69	68.64	25	NSD2	105.3	118.4	109.2	95.9	89.9	101	101.9	94.9	90.2	93.2
P00167	Cytochrome b5 [OS=Homo sapiens]	37	4	6	4	134	15.3	4.96	12.96	4	CYB5A	109.1	102.6	100.7	94.4	92.4	102.1	104	103.9	95.1	95.7
P00338	L-lactate dehydrogenase A chain [OS=Homo sapiens]	56	26	220	23	332	36.7	8.27	440.46	26	LDHA	98.1	91.5	94.8	99.7	96.9	101.3	105	106.9	103.5	102.2
P00367	Glutamate dehydrogenase 1, mitochondrial [OS=Homo sapiens]	46	24	101	24	558	61.4	7.8	244.34	24	GLUD1	97.3	94.6	97.1	99.4	90.6	103.3	98.7	102.2	110.9	105.9
P00374	Dihydrofolate reductase [OS=Homo sapiens]	27	4	12	4	187	21.4	7.42	29.08	4	DHFR	109.7	101.5	103.1	92.2	91.7	101	111.4	103	93.7	92.8
P00387	NADH-cytochrome b5 reductase 3 [OS=Homo sapiens]	35	8	18	8	301	34.2	7.59	47.63	8	CYB5R3	105	100.1	102.8	99.4	99.7	97.5	95.5	98.3	95.4	106.3
P00390	Glutathione reductase, mitochondrial [OS=Homo sapiens]	32	10	22	10	522	56.2	8.5	56.44	10	GSR	91.8	95.6	96.3	126.5	128.1	88.7	89.1	92.6	94.5	96.9
P00441	Superoxide dismutase [Cu-Zn] [OS=Homo sapiens]	68	14	79	14	154	15.9	6.13	183.21	14	SOD1	96.9	100.3	100.6	113.5	115.9	91.2	94.4	92.1	101.5	93.7
P00491	Purine nucleoside phosphorylase [OS=Homo sapiens]	57	13	62	13	289	32.1	6.95	155.12	13	PNP	105	103.2	102.5	109	122.1	89	92.4	87	96	93.7
P00492	Hypoxanthine-guanine phosphoribosyltransferase [OS=Homo sapiens]	56	10	36	9	218	24.6	6.68	85.43	10	HPRT1	102.9	96.1	99.2	99.2	104.3	99.6	99.1	102.3	95	102.3
P00505	Aspartate aminotransferase, mitochondrial [OS=Homo sapiens]	45	20	77	20	430	47.5	9.01	165.44	20	GOT2	89.3	86.4	89.3	86.6	82	111.7	113.5	114.6	109.9	116.8
P00519	Tyrosine-protein kinase ABL1 [OS=Homo sapiens]	7	6	7	6	1130	122.8	8.66	22.7	6	ABL1	91.6	92.5	105.8	102	98.8	106.9	89.3	104.5	85.4	123.3
P00533	Epidermal growth factor receptor [OS=Homo sapiens]	42	42	139	41	1210	134.2	6.68	331.57	42	EGFR	111	106.2	104.8	95.1	95.1	97.1	99.2	92	97.5	102
P00558	Phosphoglycerate kinase 1 [OS=Homo sapiens]	72	33	437	28	417	44.6	8.1	1205.93	33	PGK1	93.4	91.8	93.8	106.6	103.9	98.7	99.1	103.6	106	103.1
P00568	Adenylate kinase isoenzyme 1 [OS=Homo sapiens]	72	15	66	15	194	21.6	8.63	158.34	15	AK1	102.9	104.6	95.4	104.9	109.9	96.8	89.3	94.4	102.7	99.2
P00749	Urokinase-type plasminogen activator [OS=Homo sapiens]	20	7	10	7	431	48.5	8.41	18.88	7	PLAU	107.1	94.5	108.6	92.1	109.7	97.8	103.9	87.6	103	95.6
P00750	Tissue-type plasminogen activator [OS=Homo sapiens]	4	2	2	2	562	62.9	7.8	4.95	2	PLAT	111.3	114.4	110.2	119.7	125.4	84.3	78.7	71.9	95.8	88.3
P01034	Cystatin-C [OS=Homo sapiens]	25	3	6	3	146	15.8	8.75	15.18	3	CST3	95.3	100.4	99.5	123.4	116.8	91.8	78.7	86.6	109.3	98.3
P01111	GTPase NRas [OS=Homo sapiens]	35	6	16	4	189	21.2	5.17	21.93	6	NRAS	134.6	97.7	106.2	90.4	113.2	86.2	88.8	82.9	105.1	95
P01112	GTPase HRas [OS=Homo sapiens]	35	6	16	4	189	21.3	5.31	32.18	6	HRAS	122.6	98.5	105	97.7	122.2	87.9	84.9	83.9	93.1	104.2
P01130	Low-density lipoprotein receptor [OS=Homo sapiens]	17	12	17	12	860	95.3	5.05	38.09	12	LDLR	106.4	91.8	102.4	106.9	110.5	91.9	89.3	93.3	103.2	104.3
P01889	HLA class I histocompatibility antigen, B alpha chain [OS=Homo sapiens]	23	7	16	3	362	40.4	5.85	34.52	7	HLA-B	86.3	75.5	76.5	80.4	93.6	116.6	112.2	114.1	116.5	128.2
P02545	Prelamin-A/C [OS=Homo sapiens]	76	78	683	76	664	74.1	7.02	1596.76	78	LMNA	99	100.3	100.8	102.9	93	99.3	97.2	100.5	103.5	103.4
P02649	Apolipoprotein E [OS=Homo sapiens]	3	1	3	1	317	36.1	5.73	3.56	1	APOE	103.5	97.1	83.7	129.9	176	76	81.9	77.1	84	90.9
P02656	Apolipoprotein C-III [OS=Homo sapiens]	16	1	1	1	99	10.8	5.41	3.92	1	APOC3	88.2	84.1	80	110	166.2	74	89.3	85.5	106.9	115.9
P02686	Myelin basic protein [OS=Homo sapiens]	15	4	6	4	304	33.1	9.79	8.5	4	MBP	110.4	108.7	90.2	91.3	103.4	103	89.3	93	114	96.7
P02751	Fibronectin [OS=Homo sapiens]	8	15	18	15	2477	272.2	5.5	43.12	15	FN1	69.3	75.1	74.6	97.5	95.6	111.5	106.2	107.9	135.2	127
P02765	Alpha-2-HS-glycoprotein [OS=Homo sapiens]	5	2	5	2	367	39.3	5.72	11.96	2	AHSG	98.2	126.8	92.4	105.7	142.6	67.6	102.5	103.5	91.9	68.8
P02768	Albumin [OS=Homo sapiens]	8	5	12	5	609	69.3	6.28	15.88	5	ALB	106.3	107.6	91.9	92.1	138.9	80	96.7	101.7	91.9	92.7
P02786	Transferrin receptor protein 1 [OS=Homo sapiens]	38	27	112	27	760	84.8	6.61	261.31	27	TFRC	122.8	105.3	111.2	88.1	97.5	98	101.7	92.6	89	93.9
P02787	Serotransferrin [OS=Homo sapiens]	2	1	1	1	698	77	7.12	1.62	1		100.9	88.5	106.5	114.3	98.3	101.2	104.1	98.4	90	97.7
P02788	Lactotransferrin [OS=Homo sapiens]	3	2	4	2	710	78.1	8.12	7.52	2	LTF	104.4	112.5	88.7	100.6	99.2	89.8	91	94.7	97.5	121.6
P02794	Ferritin heavy chain [OS=Homo sapiens]	21	3	7	3	183	21.2	5.55	20.27	3	FTH1	91.6	84.5	87.9	110.1	133.5	95	91.6	97.1	103.3	105.4
P02795	Metallothionein-2 [OS=Homo sapiens]	67	4	76	1	61	6	7.83	239.39	4	MT2A	84.8	102.3	87.7	90.4	86.8	112.1	111	109.3	111	104.6
P03928	ATP synthase protein 8 [OS=Homo sapiens]	29	2	6	2	68	8	9.91	0	2	MT-ATP8	95	109.1	91.7	94.1	90.8	102.8	96.8	103.4	107.1	109.3
P04004	Vitronectin [OS=Homo sapiens]	5	2	4	2	478	54.3	5.8	8.9	2	VTN	53.6	72.2	87.7	164.8	136.2	61	78.5	112.8	114.5	118.8
P04040	Catalase [OS=Homo sapiens]	28	15	38	15	527	59.7	7.39	70.2	15	CAT	100.5	96.7	97.5	99.9	97.9	98.6	94.7	95.6	109.3	109.4
P04049	RAF proto-oncogene serine/threonine-protein kinase [OS=Homo sapiens]	10	6	7	4	648	73	9.2	14.32	6	RAF1	92.1	107.5	114.5	93.1	101.6	109	96.9	100.1	96.3	88.9
P04062	Lysosomal acid glucosylceramidase [OS=Homo sapiens]	9	5	8	5	536	59.7	7.61	13.59	5	GBA1	108.1	101.5	110.5	109.7	104.2	93.7	79.7	91.2	101.8	99.7
P04075	Fructose-bisphosphate aldolase A [OS=Homo sapiens]	71	30	424	23	364	39.4	8.09	1195.4	30	ALDOA	89.9	94.5	92.2	104.3	104.8	101.1	97.1	102.2	109.2	104.7
P04080	Cystatin-B [OS=Homo sapiens]	55	4	33	4	98	11.1	7.56	111.91	4	CSTB	79.6	87.9	88.2	116.2	97.9	111.7	105.7	113.3	102.6	96.8
P04083	Annexin A1 [OS=Homo sapiens]	73	30	385	30	346	38.7	7.02	960.43	30	ANXA1	94.1	92.4	90.9	105.8	108	100.6	99.1	100.2	105.7	103.2
P04114	Apolipoprotein B-100 [OS=Homo sapiens]	1	4	10	3	4563	515.3	7.05	23.31	4	APOB	90.6	94.7	93.2	132.1	152.6	83.1	82.6	83.1	90.8	97.1
P04150	Glucocorticoid receptor [OS=Homo sapiens]	31	18	36	18	777	85.6	6.38	88.82	18	NR3C1	97.6	92.9	98.7	103.1	101.8	102	101.4	101	101.4	100.1
P04156	Major prion protein [OS=Homo sapiens]	8	2	8	2	253	27.6	9	22.06	2	PRNP	97.5	93.7	92.3	99.7	98.2	105.3	98.8	100.7	104.8	108.9
P04179	Superoxide dismutase [Mn], mitochondrial [OS=Homo sapiens]	6	1	1	1	222	24.7	8.25	2.6	1	SOD2	138	108.3	112	75.8	177.9	54.7	56.6	60.2	81.6	134.9
P04181	Ornithine aminotransferase, mitochondrial [OS=Homo sapiens]	33	13	37	13	439	48.5	7.03	95.92	13	OAT	98.7	93.7	96.7	100.2	92.4	102.3	103.2	100.6	108.1	104
P04183	Thymidine kinase, cytosolic [OS=Homo sapiens]	41	8	19	8	234	25.5	8.51	37.36	8	TK1	120.2	111.1	112.4	87.4	78.7	103.4	117.9	104.3	85.5	79
P04233	HLA class II histocompatibility antigen gamma chain [OS=Homo sapiens]	8	2	2	2	296	33.5	8.44	3.99	2	CD74	121.7	86.2	104.6	94.8	91.6	95.9	95	97.6	104.9	107.8
P04350	Tubulin beta-4A chain [OS=Homo sapiens]	69	26	928	1	444	49.6	4.88	2282.94	26	TUBB4A	102.1	89.6	100.7	99.3	112.4	89.2	96.7	95.4	93.9	120.7
P04406	Glyceraldehyde-3-phosphate dehydrogenase [OS=Homo sapiens]	71	31	942	31	335	36	8.46	2414.79	31	GAPDH	96.3	97.9	95.7	104.7	106	99	96.8	100.3	102.3	100.9
P04424	Argininosuccinate lyase [OS=Homo sapiens]	10	5	6	5	464	51.6	6.48	12.76	5	ASL	93.1	94.7	96.7	97.3	113	99.7	96.2	99.2	102.9	107.1
P04439	HLA class I histocompatibility antigen, A alpha chain [OS=Homo sapiens]	27	9	23	5	365	40.8	6	57.93	9	HLA-A	96.4	90.1	91.9	91.8	86	105.1	107	99.7	115.4	116.7
P04626	Receptor tyrosine-protein kinase erbB-2 [OS=Homo sapiens]	2	2	4	1	1255	137.8	5.91	6.31	2	ERBB2	89.1	127.6	71.6	93.2	77.3	106.1	97.7	118.3	103.4	115.7
P04632	Calpain small subunit 1 [OS=Homo sapiens]	43	7	43	7	268	28.3	5.2	180.52	7	CAPNS1	100.3	92.2	101.2	103.2	104.1	99	99.4	104.5	97.5	98.6
P04637	Cellular tumor antigen p53 [OS=Homo sapiens]	22	8	13	8	393	43.6	6.79	28.52	8	TP53	109.6	108.9	112.9	105.1	102.5	96.5	88.4	95.8	94.7	85.7
P04731	Metallothionein-1A [OS=Homo sapiens]	46	2	23	1	61	6.1	7.96	59.33	2	MT1A	80.1	101.7	84.5	86	81.3	116.8	117.3	116.1	111.4	104.7
P04732	Metallothionein-1E [OS=Homo sapiens]	67	4	53	1	61	6	7.96	141.65	4	MT1E	95.8	90.4	93.6	86.2	91.5	102.8	126.7	99	115.2	98.8
P04733	Metallothionein-1F [OS=Homo sapiens]	34	3	36	2	61	6.1	7.83	50.16	3	MT1F	84	93.9	89.7	93.2	100.4	106	109	103.3	109.9	110.7
P04792	Heat shock protein beta-1 [OS=Homo sapiens]	61	14	117	14	205	22.8	6.4	290.99	14	HSPB1	90.1	98.2	95.4	108.6	113.5	93.5	93.4	97.8	106.6	102.7
P04818	Thymidylate synthase [OS=Homo sapiens]	35	10	27	10	313	35.7	7.01	55.93	10	TYMS	104.8	103.6	100.8	81.1	77.4	116.8	114	114	88.8	98.6
P04843	Dolichyl-diphosphooligosaccharide--protein glycosyltransferase subunit 1 [OS=Homo sapiens]	34	24	78	24	607	68.5	6.38	150.79	24	RPN1	105.8	106	103.4	96.8	92.1	98.8	99.6	98.2	98	101.4
P04844	Dolichyl-diphosphooligosaccharide--protein glycosyltransferase subunit 2 [OS=Homo sapiens]	14	7	12	7	631	69.2	5.69	30.15	7	RPN2	129.6	103.2	107.7	88.9	104.5	88.6	91.6	84	95.8	106
P04899	Guanine nucleotide-binding protein G(i) subunit alpha-2 [OS=Homo sapiens]	55	16	50	12	355	40.4	5.54	140.07	16	GNAI2	118.2	95.6	104.4	97.8	115.6	92.2	87.7	86.7	100.3	101.4
P04920	Anion exchange protein 2 [OS=Homo sapiens]	5	5	9	5	1241	136.9	6.29	19.53	5	SLC4A2	117.1	103.3	102.6	100.5	110.6	94.5	94.5	87.8	89.5	99.6
P05023	Sodium/potassium-transporting ATPase subunit alpha-1 [OS=Homo sapiens]	36	37	160	37	1023	112.8	5.49	433.79	37	ATP1A1	129.4	106	111.4	98.9	123	84	79.3	78.1	90.8	99.1
P05026	Sodium/potassium-transporting ATPase subunit beta-1 [OS=Homo sapiens]	42	10	45	10	303	35	8.53	116.62	10	ATP1B1	108.4	106.2	107.4	112.9	104.3	89.7	86.7	91.3	99.7	93.5
P05067	Amyloid-beta precursor protein [OS=Homo sapiens]	24	14	22	14	770	86.9	4.82	48.94	14	APP	97.6	91.3	97.2	114.8	122.3	90.6	86.3	92.1	101.5	106.3
P05091	Aldehyde dehydrogenase, mitochondrial [OS=Homo sapiens]	31	12	28	12	517	56.3	7.05	59.41	12	ALDH2	102.7	96	98.6	109.2	106.9	95.6	93.7	93.1	104.4	100
P05107	Integrin beta-2 [OS=Homo sapiens]	5	4	5	4	769	84.7	6.95	8.42	4	ITGB2	167.9	131.1	136.2	117.3	92.5	83.8	83.3	61.1	69.2	57.6
P05114	Non-histone chromosomal protein HMG-14 [OS=Homo sapiens]	52	9	34	9	100	10.7	9.6	62.17	9	HMGN1	102.8	98.3	105	98.4	85.8	103.5	110.8	107.3	93	95.1
P05141	ADP/ATP translocase 2 [OS=Homo sapiens]	49	20	114	7	298	32.8	9.69	244.27	20	SLC25A5	95.8	96.4	100	96.6	81.3	109.8	110.7	105.6	104.8	99
P05161	Ubiquitin-like protein ISG15 [OS=Homo sapiens]	11	2	5	2	165	17.9	7.44	7.46	2	ISG15	104.9	101.7	103	130.5	135.8	84	79.5	79.1	90.3	91.3
P05198	Eukaryotic translation initiation factor 2 subunit 1 [OS=Homo sapiens]	69	25	101	25	315	36.1	5.08	272.92	25	EIF2S1	102	98.7	98.8	99.4	97.2	101.4	103.6	100.2	98.4	100.3
P05204	Non-histone chromosomal protein HMG-17 [OS=Homo sapiens]	50	6	60	5	90	9.4	9.99	118.28	6	HMGN2	89.3	95.9	97	78.8	73.1	111.5	114	109.8	121.9	108.8
P05362	Intercellular adhesion molecule 1 [OS=Homo sapiens]	20	9	13	9	532	57.8	7.99	27.49	9	ICAM1	72.2	74.5	80.2	122	105.9	94.2	90.7	99.7	146.2	114.4
P05386	60S acidic ribosomal protein P1 [OS=Homo sapiens]	73	6	87	4	114	11.5	4.32	265.9	6	RPLP1	99.8	103.7	103	95.9	97.6	102.9	103.5	99.4	95.3	99
P05387	60S acidic ribosomal protein P2 [OS=Homo sapiens]	93	10	171	8	115	11.7	4.54	414.45	10	RPLP2	96	103.4	101.3	96	90.8	109	108.2	105.8	98.2	91.3
P05388	60S acidic ribosomal protein P0 [OS=Homo sapiens]	70	20	158	20	317	34.3	5.97	399.17	20	RPLP0	95.6	98.4	96.9	100.2	88.5	110.5	107.6	109.1	94.5	98.6
P05412	Transcription factor Jun [OS=Homo sapiens]	24	5	13	4	331	35.7	8.76	33.35	5	JUN	101.7	97.4	94.5	102.1	95.5	98.5	106.5	101.9	96.1	105.7
P05423	DNA-directed RNA polymerase III subunit RPC4 [OS=Homo sapiens]	4	1	2	1	398	44.4	6.98	2.63	1	POLR3D	108.3	104.5	93.5	97.3	102.3	116.9	106.4	103	80.6	87.1
P05455	Lupus La protein [OS=Homo sapiens]	56	27	86	27	408	46.8	7.12	147.76	27	SSB	98.6	101.5	97.7	104	100.8	99.9	99.9	101.2	100	96.4
P05496	ATP synthase F(0) complex subunit C1, mitochondrial [OS=Homo sapiens]	5	1	1	1	136	14.3	9.74	2.15	1	ATP5MC1	118.6	117.2	99.7	102.1	98.1	105.3	96.9	95.5	92.7	74.1
P05556	Integrin beta-1 [OS=Homo sapiens]	39	35	172	35	798	88.4	5.39	414.31	35	ITGB1	103	97.9	101.1	100.7	97.5	97.3	98	97.8	103.5	103.2
P06132	Uroporphyrinogen decarboxylase [OS=Homo sapiens]	25	7	29	7	367	40.8	6.14	78.21	7	UROD	93	94.7	95.7	101.9	103.5	100.6	98.2	99.5	107.4	105.6
P06213	Insulin receptor [OS=Homo sapiens]	1	1	2	1	1382	156.2	6.2	4.71	1	INSR	103.5	94.1	108.5	87.1	92.3	104.7	101.5	104	93.6	110.5
P06239	Tyrosine-protein kinase Lck [OS=Homo sapiens]	4	2	15	1	509	58	5.36	20.06	2	LCK	109.9	99.2	112.6	111.2	103.3	74.8	93.3	78.6	120	96.9
P06280	Alpha-galactosidase A [OS=Homo sapiens]	16	5	5	5	429	48.7	5.6	5.74	5	GLA	102.9	93.5	97	108	108.7	95.1	97	91.5	99.8	106.5
P06396	Gelsolin [OS=Homo sapiens]	36	20	77	20	782	85.6	6.28	204.55	20	GSN	101.2	96.8	104.5	118.7	104	88.4	87.6	96.1	107.1	95.5
P06400	Retinoblastoma-associated protein [OS=Homo sapiens]	18	13	31	13	928	106.1	7.94	67.85	13	RB1	108.7	110.3	108.7	97.5	94.2	102.8	98.3	99.3	91	89.2
P06454	Prothymosin alpha [OS=Homo sapiens]	25	7	60	7	111	12.2	3.78	131.47	7	PTMA	97.6	95.7	96.8	96.3	104	101.4	106.8	103.7	103.6	94.2
P06493	Cyclin-dependent kinase 1 [OS=Homo sapiens]	39	13	61	11	297	34.1	8.4	121.04	13	CDK1	99	104.1	100.4	92.9	97.3	102.9	103.6	104.2	100.1	95.7
P06576	ATP synthase subunit beta, mitochondrial [OS=Homo sapiens]	64	26	254	26	529	56.5	5.4	683.14	26	ATP5F1B	99.3	98.5	100.1	91.3	89.3	102	102.2	101.7	107.1	108.4
P06703	Protein S100-A6 [OS=Homo sapiens]	50	9	51	9	90	10.2	5.48	56.49	9	S100A6	101.7	92.4	98.1	103.9	101.3	96.9	104	103.7	97.2	100.8
P06730	Eukaryotic translation initiation factor 4E [OS=Homo sapiens]	22	4	19	4	217	25.1	6.15	54.58	4	EIF4E	98.2	96.3	99.1	100.9	105.6	100.7	97.6	101.4	99.4	100.8
P06733	Alpha-enolase [OS=Homo sapiens]	82	44	1211	38	434	47.1	7.39	3480.07	44	ENO1	105.2	104.7	105.6	115.9	113.1	90.9	89.1	91.4	95.3	88.8
P06737	Glycogen phosphorylase, liver form [OS=Homo sapiens]	43	39	95	32	847	97.1	7.17	179.64	39	PYGL	115.3	103.5	117.6	120.6	119.7	82.1	88.1	84.2	84.4	84.6
P06744	Glucose-6-phosphate isomerase [OS=Homo sapiens]	46	25	139	24	558	63.1	8.32	346.54	25	GPI	93.3	90.2	94	103.7	102.5	101.1	102.2	105.1	102.6	105.3
P06746	DNA polymerase beta [OS=Homo sapiens]	5	2	2	2	335	38.2	8.95	0	2	POLB	96.1	105.5	106.3	107.4	105.1	93.3	99.7	92.1	91.4	103.1
P06748	Nucleophosmin [OS=Homo sapiens]	70	27	365	27	294	32.6	4.78	887.59	27	NPM1	110	108.8	106.8	95.7	100.6	99.7	97.9	97.4	93.5	89.7
P06753	Tropomyosin alpha-3 chain [OS=Homo sapiens]	46	21	171	5	285	32.9	4.72	249.35	21	TPM3	97.8	100.2	100.6	102.1	107.6	97.6	98.6	96.2	102.9	96.5
P06756	Integrin alpha-V [OS=Homo sapiens]	16	13	23	13	1048	116	5.68	47	13	ITGAV	107.1	90.7	97	103.5	96.5	98.5	94	94.5	112	106.3
P06865	Beta-hexosaminidase subunit alpha [OS=Homo sapiens]	3	2	2	1	529	60.7	5.16	2.08	2	HEXA	77.7	95	109.7	98.9	76.6	114.9	115.6	94.4	109.7	107.5
P07099	Epoxide hydrolase 1 [OS=Homo sapiens]	7	3	10	3	455	52.9	7.25	11.61	3	EPHX1	81.9	87.9	100.2	103.1	110	91.2	107.8	96.1	99.5	122.4
P07195	L-lactate dehydrogenase B chain [OS=Homo sapiens]	52	25	227	22	334	36.6	6.05	462.03	25	LDHB	98.5	99.8	97.8	102.7	104.4	100.2	98.6	100	99.3	98.6
P07199	Major centromere autoantigen B [OS=Homo sapiens]	21	9	16	9	599	65.1	4.55	40.89	9	CENPB	101.2	108.7	108.3	92	82.7	105.6	105	105.4	92.2	99
P07203	Glutathione peroxidase 1 [OS=Homo sapiens]	74	10	43	10	203	22.1	6.55	104.81	10	GPX1	96.4	95.9	91.2	94.9	93.2	106.5	105.6	108.5	107.7	100
P07204	Thrombomodulin [OS=Homo sapiens]	13	4	4	4	575	60.3	4.92	13.23	4	THBD	102.4	111	106.5	108.1	129.7	84.2	88.4	77.6	95.5	96.6
P07237	Protein disulfide-isomerase [OS=Homo sapiens]	62	41	282	41	508	57.1	4.87	549.89	41	P4HB	101.1	101.2	101.2	102.6	106.1	97	94.9	92.9	104.5	98.6
P07305	Histone H1.0 [OS=Homo sapiens]	28	6	54	6	194	20.9	10.84	118.16	6	H1-0	105.2	113.7	108.6	98.8	84.9	100.1	96.5	100.7	98.3	93.2
P07311	Acylphosphatase-1 [OS=Homo sapiens]	37	4	5	4	99	11.3	9.31	10.82	4	ACYP1	87.8	113.7	97.7	113.6	97.6	103.6	92.9	99.9	101.8	91.4
P07339	Cathepsin D [OS=Homo sapiens]	49	19	217	19	412	44.5	6.54	666.76	19	CTSD	91.5	89	90.5	105.4	103.9	96.3	89.7	99.3	120.5	113.8
P07355	Annexin A2 [OS=Homo sapiens]	72	39	512	39	339	38.6	7.75	1182.08	39	ANXA2	109.9	103.5	109.3	103.9	109.2	88.1	91.5	94.9	96.9	92.8
P07384	Calpain-1 catalytic subunit [OS=Homo sapiens]	35	20	40	19	714	81.8	5.67	93.02	20	CAPN1	90.6	90	97.5	103.6	100.8	104.9	96.8	107	105.5	103.3
P07437	Tubulin beta chain [OS=Homo sapiens]	76	35	1130	6	444	49.6	4.89	2782.41	35	TUBB	101.2	100.2	100	98.1	102.4	98.5	97.9	97.3	102.5	101.9
P07602	Prosaposin [OS=Homo sapiens]	32	16	60	16	524	58.1	5.17	135.29	16	PSAP	102	96.7	98	120.7	120.3	86	87	88.7	102.4	98.3
P07686	Beta-hexosaminidase subunit beta [OS=Homo sapiens]	20	10	16	9	556	63.1	6.76	21.09	10	HEXB	109.7	99.4	104.6	100	101	98.2	95	99.9	95.2	97.1
P07711	Procathepsin L [OS=Homo sapiens]	7	2	3	2	333	37.5	5.45	7.34	2	CTSL	85.4	93.9	89.8	104.2	118.9	96.4	91.2	102	106.2	112.1
P07737	Profilin-1 [OS=Homo sapiens]	79	17	366	17	140	15	8.27	906.21	17	PFN1	95.4	100.4	97.2	100.3	104.6	100.8	97.2	102.2	101	100.9
P07738	Bisphosphoglycerate mutase [OS=Homo sapiens]	4	1	1	1	259	30	6.54	2.66	1	BPGM	117.7	98.5	99.5	107.8	126.9	77.2	104.9	75.2	95.1	97.3
P07741	Adenine phosphoribosyltransferase [OS=Homo sapiens]	37	7	18	7	180	19.6	6.02	48.55	7	APRT	87.2	83.7	84.7	103.3	93.3	114.9	110.6	111.2	103.3	107.9
P07814	Bifunctional glutamate/proline--tRNA ligase [OS=Homo sapiens]	49	71	277	71	1512	170.5	7.33	676.02	71	EPRS1	96.5	96.5	97.7	102.1	105	99.6	101.5	101.2	101.4	98.5
P07858	Cathepsin B [OS=Homo sapiens]	30	10	31	10	339	37.8	6.3	76.7	10	CTSB	88.3	98.7	100	98.6	96.3	100	95.9	105.7	109.6	106.9
P07900	Heat shock protein HSP 90-alpha [OS=Homo sapiens]	66	62	983	37	732	84.6	5.02	2346.91	62	HSP90AA1	95.3	96.3	95.9	102	107.4	98.9	101.3	100.4	101.2	101.2
P07902	Galactose-1-phosphate uridylyltransferase [OS=Homo sapiens]	11	4	5	4	379	43.3	6.99	11.76	4	GALT	107.6	119.2	99.4	115.7	111.9	86.3	80.8	86.4	94.8	97.9
P07910	Heterogeneous nuclear ribonucleoproteins C1/C2 [OS=Homo sapiens]	60	27	200	17	306	33.7	5.08	369.21	27	HNRNPC	97.7	94.5	97.4	91.8	84.1	106.1	108.5	107	103.3	109.6
P07919	Cytochrome b-c1 complex subunit 6, mitochondrial [OS=Homo sapiens]	65	4	12	4	91	10.7	4.44	35.9	4	UQCRH	104.6	110.3	107.2	96.9	91.8	94.5	108.7	97.9	97.8	90.3
P07942	Laminin subunit beta-1 [OS=Homo sapiens]	23	29	51	29	1786	197.9	4.94	147.45	29	LAMB1	111.9	104	104.3	88.5	80.3	108.7	103.7	98.1	102.7	97.7
P07954	Fumarate hydratase, mitochondrial [OS=Homo sapiens]	49	19	68	19	510	54.6	8.76	189.11	19	FH	103.3	97.5	99.8	99.9	97.3	101.2	102.6	98.9	102	97.5
P07996	Thrombospondin-1 [OS=Homo sapiens]	23	24	48	24	1170	129.3	4.94	98.41	24	THBS1	101.4	107.9	98.4	96.7	103	100.9	105	95.9	90.9	99.9
P08047	Transcription factor Sp1 [OS=Homo sapiens]	21	11	27	10	785	80.6	7.34	94.87	11	SP1	95.9	98.1	97.9	93.3	93.9	104.2	100.9	110.8	104.2	100.8
P08133	Annexin A6 [OS=Homo sapiens]	65	49	245	49	673	75.8	5.6	461.73	49	ANXA6	94.9	88.9	92.9	102.9	102	101	103.6	103.5	105.9	104.4
P08134	Rho-related GTP-binding protein RhoC [OS=Homo sapiens]	50	11	71	4	193	22	6.58	166.94	11	RHOC	100.8	101.3	98.6	99.3	105.5	97.8	95.5	98.8	99.7	102.6
P08174	Complement decay-accelerating factor [OS=Homo sapiens]	34	12	33	12	381	41.4	7.59	79.03	12	CD55	112.6	108.6	107.1	125.1	124.7	86	85.1	80.3	84.6	85.9
P08195	4F2 cell-surface antigen heavy chain [OS=Homo sapiens]	29	19	112	19	630	68	5.01	289.65	19	SLC3A2	84.2	81.9	77.7	86.9	93.4	116.5	111.6	109.4	111.3	127
P08237	ATP-dependent 6-phosphofructokinase, muscle type [OS=Homo sapiens]	30	18	29	16	780	85.1	7.99	48.49	18	PFKM	86.5	88.9	92.7	93	93.7	110.2	113	113.5	104.3	104.2
P08238	Heat shock protein HSP 90-beta [OS=Homo sapiens]	65	59	928	29	724	83.2	5.03	2335.24	59	HSP90AB1	95.2	95.6	95.5	102.1	104.4	101.4	100.8	102.3	101.3	101.4
P08240	Signal recognition particle receptor subunit alpha [OS=Homo sapiens]	34	17	44	17	638	69.8	8.95	103.07	17	SRPRA	102	105.8	105.9	104.6	94.6	98.9	100.1	99.8	88.9	99.5
P08243	Asparagine synthetase [glutamine-hydrolyzing] [OS=Homo sapiens]	33	20	96	20	561	64.3	6.86	203.79	20	ASNS	94.5	88.5	89.7	96.7	101.1	105.5	106.3	104	105.3	108.4
P08294	Extracellular superoxide dismutase [Cu-Zn] [OS=Homo sapiens]	6	1	2	1	240	25.8	6.61	5.92	1	SOD3	143.6	112.7	104.6	108.1	98	72.6	83.8	68.8	107.7	100.2
P08397	Porphobilinogen deaminase [OS=Homo sapiens]	28	9	21	9	361	39.3	7.18	50.13	9	HMBS	121	118.5	119.9	97.9	140.4	71	81.3	70.2	89.3	90.4
P08559	Pyruvate dehydrogenase E1 component subunit alpha, somatic form, mitochondrial [OS=Homo sapiens]	42	11	28	11	390	43.3	8.06	85.14	11	PDHA1	108.5	103	102.7	99.5	88.8	102.9	98.5	99.6	100	96.5
P08572	Collagen alpha-2(IV) chain [OS=Homo sapiens]	1	2	2	2	1712	167.4	8.66	3.97	2	COL4A2	70.3	132.8	95.2	66.7	76.5	109.1	138.2	101.7	96.9	112.6
P08574	Cytochrome c1, heme protein, mitochondrial [OS=Homo sapiens]	10	2	23	2	325	35.4	9	27.88	2	CYC1	103.7	113.2	118.9	98.6	95.7	90.9	90.4	92.9	96.5	99.2
P08579	U2 small nuclear ribonucleoprotein B'' [OS=Homo sapiens]	12	3	7	2	225	25.5	9.72	13.64	3	SNRPB2	98.3	96.3	107.4	97.2	87.4	104.3	104.9	99.6	108	96.6
P08581	Hepatocyte growth factor receptor [OS=Homo sapiens]	9	8	13	8	1390	155.4	7.33	36.32	8	MET	110.8	91.9	104.8	99.3	99.2	99.3	100	91.6	102.7	100.5
P08582	Melanotransferrin [OS=Homo sapiens]	7	3	3	3	738	80.2	5.94	9.73	3	MELTF	86.7	98.9	110.9	91.1	107.1	94.1	96.1	99.8	91.3	123.9
P08621	U1 small nuclear ribonucleoprotein 70 kDa [OS=Homo sapiens]	50	21	85	21	437	51.5	9.94	166.1	21	SNRNP70	102.6	102.5	98.3	96	88.5	105.1	100.9	104.5	98.7	102.9
P08648	Integrin alpha-5 [OS=Homo sapiens]	10	8	12	8	1049	114.5	5.77	22.59	8	ITGA5	103.9	98.6	106.5	108.9	105.4	95.4	88.4	92.7	104.6	95.6
P08651	Nuclear factor 1 C-type [OS=Homo sapiens]	15	5	7	4	508	55.6	8.38	18.84	5	NFIC	105.4	99.7	107.8	97.9	89.7	101.6	100.8	99.7	103.6	93.7
P08670	Vimentin [OS=Homo sapiens]	88	73	1696	67	466	53.6	5.12	3422.19	73	VIM	102.9	102	102	92.4	84.7	103.1	102.1	103.5	103.6	103.7
P08708	40S ribosomal protein S17 [OS=Homo sapiens]	68	16	169	15	135	15.5	9.85	528.39	16	RPS17	98.9	100.1	98.9	96	96.4	104.6	104.9	103.8	97.9	98.5
P08754	Guanine nucleotide-binding protein G(i) subunit alpha-3 [OS=Homo sapiens]	23	8	25	4	354	40.5	5.69	58.53	8	GNAI3	123	90.5	106.5	106.2	109.7	95.6	86.3	84.2	92.1	105.9
P08758	Annexin A5 [OS=Homo sapiens]	70	29	335	28	320	35.9	5.05	683.63	29	ANXA5	103.5	94.8	98.4	106.8	110.3	93.3	95.6	95.5	100.5	101.3
P08833	Insulin-like growth factor-binding protein 1 [OS=Homo sapiens]	8	2	2	2	259	27.9	5.19	5.85	2	IGFBP1	100.4	115.2	108.7	90.4	101.3	92.3	114.6	87.4	100	89.7
P08865	40S ribosomal protein SA [OS=Homo sapiens]	38	11	94	11	295	32.8	4.87	253.42	11	RPSA	101.7	97.1	99.6	97	95.3	106.9	105.9	101.6	95.5	99.3
P09001	39S ribosomal protein L3, mitochondrial [OS=Homo sapiens]	5	2	4	2	348	38.6	9.48	6.74	2	MRPL3	86.8	153.9	103.9	101.6	63.6	116.5	93.5	97.7	85.2	97.2
P09012	U1 small nuclear ribonucleoprotein A [OS=Homo sapiens]	25	7	22	6	282	31.3	9.83	52.57	7	SNRPA	99.3	101.2	98.8	102	88.3	103.1	102.4	104.2	99.3	101.5
P09104	Gamma-enolase [OS=Homo sapiens]	80	23	270	17	434	47.2	5.03	860.79	23	ENO2	94.9	96.6	95.3	111.4	105.2	99.3	95.4	100.8	101.8	99.4
P09110	3-ketoacyl-CoA thiolase, peroxisomal [OS=Homo sapiens]	27	8	22	8	424	44.3	8.44	62.2	8	ACAA1	112.4	105.6	112.3	98.2	103.4	95.4	98.9	88.8	99.3	85.8
P09132	Signal recognition particle 19 kDa protein [OS=Homo sapiens]	50	6	19	6	144	16.1	9.85	57.32	6	SRP19	96	94.7	92.9	98.8	93.5	102.9	107.7	106.5	106.7	100.4
P09211	Glutathione S-transferase P [OS=Homo sapiens]	62	12	81	12	210	23.3	5.64	239.51	12	GSTP1	97.2	93.5	94.2	107.5	113.2	95.9	94	97.1	101.4	106
P09234	U1 small nuclear ribonucleoprotein C [OS=Homo sapiens]	13	2	13	2	159	17.4	9.67	32.67	2	SNRPC	105.8	104.1	104.9	100.4	83.9	99.7	101.5	97.5	98.5	103.5
P09382	Galectin-1 [OS=Homo sapiens]	81	12	148	12	135	14.7	5.5	414.7	12	LGALS1	99.8	92.9	99.5	99.1	79.1	110.1	112.2	111.3	99.6	96.4
P09417	Dihydropteridine reductase [OS=Homo sapiens]	51	10	18	10	244	25.8	7.37	45.24	10	QDPR	117.1	118.1	110.4	114.5	114.3	86.3	85.3	86.2	87.4	80.5
P09429	High mobility group protein B1 [OS=Homo sapiens]	55	13	120	10	215	24.9	5.74	252.1	13	HMGB1	91.4	105.3	98.9	100.5	100.9	102.4	96.6	103.1	101	100
P09467	Fructose-1,6-bisphosphatase 1 [OS=Homo sapiens]	7	2	3	2	338	36.8	6.99	1.91	2	FBP1	88.3	91.2	68	96.1	123.8	103.6	111.4	94.4	109	114.2
P09493	Tropomyosin alpha-1 chain [OS=Homo sapiens]	44	18	115	6	284	32.7	4.74	175.84	18	TPM1	102.2	93.2	97	104.8	107.3	93	101.2	95.6	99.5	106.3
P09496	Clathrin light chain A [OS=Homo sapiens]	25	10	32	9	248	27.1	4.51	40.2	10	CLTA	98.9	104.6	99.1	108	105.9	96.7	91.5	96.1	102.9	96.3
P09497	Clathrin light chain B [OS=Homo sapiens]	32	11	37	11	229	25.2	4.64	63.12	11	CLTB	102.3	108.9	100.5	110.1	104.9	95.1	93	96.4	95.8	93
P09525	Annexin A4 [OS=Homo sapiens]	40	12	41	11	319	35.9	6.13	100.7	12	ANXA4	93.4	88.9	92	108.2	105.4	96.4	100.1	102.3	111.2	102.2
P09543	2',3'-cyclic-nucleotide 3'-phosphodiesterase [OS=Homo sapiens]	35	16	27	16	421	47.5	9.07	46.06	16	CNP	113.5	97.1	108.5	102.7	106.4	95.2	92	94.3	94	96.2
P09601	Heme oxygenase 1 [OS=Homo sapiens]	5	1	1	1	288	32.8	8.25	2.21	1	HMOX1	74.6	112.3	73.4	112.8	154.9	75.1	83.9	76.1	108.8	128.1
P09603	Macrophage colony-stimulating factor 1 [OS=Homo sapiens]	12	4	11	4	554	60.1	5.29	28.06	4	CSF1	71.4	83.1	92.1	134.4	110	95.6	84.5	97.5	126.5	105
P09622	Dihydrolipoyl dehydrogenase, mitochondrial [OS=Homo sapiens]	42	20	98	20	509	54.1	7.85	186.34	20	DLD	95	103.1	95	95.4	99.2	90.1	98.9	96.3	121.4	105.7
P09651	Heterogeneous nuclear ribonucleoprotein A1 [OS=Homo sapiens]	67	26	230	10	372	38.7	9.13	489.98	26	HNRNPA1	97.4	97.2	100.5	91	85.7	108.2	109.1	108.3	98.7	103.9
P09661	U2 small nuclear ribonucleoprotein A' [OS=Homo sapiens]	51	15	67	15	255	28.4	8.62	159.84	15	SNRPA1	100.9	95.8	97.8	101.3	92.2	101.5	103.3	101.7	105	100.5
P09669	Cytochrome c oxidase subunit 6C [OS=Homo sapiens]	33	3	5	3	75	8.8	10.39	6.61	3	COX6C	112.2	102.6	109.9	97.9	83.1	98.2	106.9	96.7	102.2	90.3
P09758	Tumor-associated calcium signal transducer 2 [OS=Homo sapiens]	16	4	10	4	323	35.7	8.87	27.55	4	TACSTD2	89	76.7	88.6	126.9	118.6	94.1	83	88	117.5	117.5
P09874	Poly [ADP-ribose] polymerase 1 [OS=Homo sapiens]	45	47	154	47	1014	113	8.88	336.4	47	PARP1	103.4	104	105.2	95.9	89	103.1	105.3	101.4	94.9	97.7
P09884	DNA polymerase alpha catalytic subunit [OS=Homo sapiens]	7	7	9	7	1462	165.8	5.85	26.45	7	POLA1	100.6	96.6	101.8	94.1	96.1	111.7	110.2	99.4	90.4	99.1
P09913	Interferon-induced protein with tetratricopeptide repeats 2 [OS=Homo sapiens]	12	5	8	5	472	54.6	6.76	14.71	5	IFIT2	111.4	104.6	101.8	138.2	131.4	84.1	78.3	83.7	84.3	82.1
P09914	Interferon-induced protein with tetratricopeptide repeats 1 [OS=Homo sapiens]	21	8	11	8	478	55.3	7.2	29.03	8	IFIT1	115.2	101.6	105.4	133.3	143.3	76	76.4	82.5	80.4	85.8
P09960	Leukotriene A-4 hydrolase [OS=Homo sapiens]	40	23	82	23	611	69.2	6.18	153.29	23	LTA4H	96.4	92	99.1	107.6	104.6	96.8	98.7	100.9	103.1	100.8
P09972	Fructose-bisphosphate aldolase C [OS=Homo sapiens]	47	16	114	9	364	39.4	6.87	345.11	16	ALDOC	79.8	83.6	88.1	103.5	106.2	101.9	98.4	108.8	117.1	112.7
P0C1Z6	TCF3 fusion partner [OS=Homo sapiens]	9	2	2	2	253	28.3	5.21	4.37	2	TFPT	96.9	110.6	107.4	95.2	77.2	100.2	115.7	79.8	105.6	111.3
P0C7P0	CDGSH iron-sulfur domain-containing protein 3, mitochondrial [OS=Homo sapiens]	6	1	1	1	127	14.2	10.55	2.1	1	CISD3	117.6	86.9	97.4	91.4	96.8	91.6	88	100.9	137.4	92
P0C7T5	Ataxin-1-like [OS=Homo sapiens]	6	3	4	3	689	73.3	6.6	8.96	3	ATXN1L	135.1	178.8	116.2	74.8	45.8	68.6	57.7	54.3	52.8	215.8
P0CAP2	DNA-directed RNA polymerase II subunit GRINL1A [OS=Homo sapiens]	14	4	4	4	368	41.7	6.39	12.44	4	POLR2M	99.1	105.3	79.4	102.1	107.5	102.5	99.5	95.2	94.8	114.6
P0CG12	Decreased expression in renal and prostate cancer protein [OS=Homo sapiens]	14	5	9	5	524	51.4	12.41	21.7	5	DERPC	78.4	90.1	93.1	90.8	84.1	115.2	108.5	115.1	121.3	103.4
P0CG13	Chromosome transmission fidelity protein 8 homolog [OS=Homo sapiens]	15	1	1	1	121	13.3	8.18	0	1	CHTF8	80.6	109.6	94.9	104.9	74.2	109.3	101.5	110.2	109.6	105.1
P0CG30	Glutathione S-transferase theta-2B [OS=Homo sapiens]	13	3	6	3	244	27.5	6.4	6.83	3	GSTT2B	101.4	120.7	108.8	110.5	105.1	91.7	98.3	83.6	95.6	84.5
P0CG39	POTE ankyrin domain family member J [OS=Homo sapiens]	7	8	202	1	1038	117.3	5.97	314.49	8	POTEJ	106.4	83.4	101.8	105.5	105.8	108.7	94.9	108.4	81.2	103.9
P0DMN0	Sulfotransferase 1A4 [OS=Homo sapiens]	3	1	1	1	295	34.2	6.01	1.77	1	SULT1A4	131.2	75.6	83.3	144.4	118.9	81.2	82.8	74.8	122.1	85.7
P0DMV9	Heat shock 70 kDa protein 1B [OS=Homo sapiens]	63	42	331	20	641	70	5.66	733.83	42	HSPA1B	82	82.1	84.6	118.5	126	96	95	98.3	106.8	110.9
P0DP23	Calmodulin-1 [OS=Homo sapiens]	72	10	111	10	149	16.8	4.22	318.99	10	CALM1	98.2	116.1	117.2	76.1	111.5	86.2	103.8	91.6	104.1	95.3
P0DPB6	DNA-directed RNA polymerases I and III subunit RPAC2 [OS=Homo sapiens]	36	4	8	4	133	15.2	5.8	14.21	4	POLR1D	104	109.5	97.3	97.4	100.2	108.3	104.8	89.4	108.3	80.8
P10075	Zinc finger protein GLI4 [OS=Homo sapiens]	4	1	1	1	376	41.1	8.81	2.94	1	GLI4	107	86.2	92.9	95.1	105.5	88.7	98.9	97.6	113.5	114.7
P10109	Adrenodoxin, mitochondrial [OS=Homo sapiens]	38	8	17	7	184	19.4	5.83	20.04	8	FDX1	119.5	115.2	110	97.8	89.1	96.2	94.1	92.2	99.6	86.3
P10124	Serglycin [OS=Homo sapiens]	9	1	1	1	158	17.6	4.96	2.96	1	SRGN	68.9	72.9	67.3	121.3	136.8	96.1	103.8	73.7	122	137.2
P10155	RNA-binding protein RO60 [OS=Homo sapiens]	32	13	35	13	538	60.6	8.03	84.44	13	RO60	100.9	90.8	96.7	101.9	110.8	98	99.7	102.1	102.4	96.5
P10176	Cytochrome c oxidase subunit 8A, mitochondrial [OS=Homo sapiens]	13	1	16	1	69	7.6	10.24	13.38	1	COX8A	99.6	99.2	101.5	98.5	94.7	99.6	96.8	98.9	103.4	107.8
P10242	Transcriptional activator Myb [OS=Homo sapiens]	1	1	2	1	640	72.3	6.83	1.85	1	MYB	96.5	80	92.5	83.1	92.6	83.5	87.2	135.9	97	151.8
P10243	Myb-related protein A [OS=Homo sapiens]	3	3	5	2	752	85.8	7.12	3.77	3	MYBL1	101.8	95.2	102.9	94.1	73.6	100.5	115.9	97.6	109.7	108.7
P10301	Ras-related protein R-Ras [OS=Homo sapiens]	28	4	6	2	218	23.5	6.93	12.01	4	RRAS	109.9	82	99.2	100.8	148.4	83.5	87.1	75.2	104.1	109.7
P10321	HLA class I histocompatibility antigen, C alpha chain [OS=Homo sapiens]	26	9	32	4	366	40.6	6.04	74.39	9	HLA-C	87.5	90.9	92.2	98.5	93.6	106.9	100.5	104.8	111.2	113.8
P10398	Serine/threonine-protein kinase A-Raf [OS=Homo sapiens]	11	6	8	4	606	67.5	9.01	13.49	6	ARAF	97.7	80.8	104.7	103.2	85.6	103.5	103.9	103.8	113.4	103.4
P10412	Histone H1.4 [OS=Homo sapiens]	52	24	273	9	219	21.9	11.03	436.49	24	H1-4	93.6	103.4	97.8	85.7	74.2	114.8	108	114.3	105.6	102.6
P10515	Dihydrolipoyllysine-residue acetyltransferase component of pyruvate dehydrogenase complex, mitochondrial [OS=Homo sapiens]	23	11	36	11	647	69	7.84	72.8	11	DLAT	111.4	112.5	112.7	103.9	101.4	92.2	91	87.4	96.4	91
P10586	Receptor-type tyrosine-protein phosphatase F [OS=Homo sapiens]	4	5	5	5	1907	212.7	6.3	10.34	5	PTPRF	87	102.1	87.8	103.1	113.9	99.6	93.2	93.7	114.5	105.2
P10599	Thioredoxin [OS=Homo sapiens]	75	10	123	10	105	11.7	4.92	240.2	10	TXN	91.3	96.6	94.6	108.6	109	102.3	99.2	97.9	101.3	99.3
P10606	Cytochrome c oxidase subunit 5B, mitochondrial [OS=Homo sapiens]	57	9	34	9	129	13.7	8.81	58.89	9	COX5B	100.3	112.7	108.6	96.9	88.5	98.9	95	97.3	102.8	99.1
P10619	Lysosomal protective protein [OS=Homo sapiens]	13	6	11	6	480	54.4	6.61	23.75	6	CTSA	109.8	97.6	101.3	111.1	97.9	98.8	95.5	90.7	99.5	97.8
P10620	Microsomal glutathione S-transferase 1 [OS=Homo sapiens]	8	1	3	1	155	17.6	9.39	9.65	1	MGST1	98.5	76.8	117.6	112.2	126.1	86.2	111.1	97.6	70.1	103.9
P10644	cAMP-dependent protein kinase type I-alpha regulatory subunit [OS=Homo sapiens]	34	14	42	13	381	43	5.35	97.24	14	PRKAR1A	96.8	95.1	92.8	101.1	100	104.8	103.2	104	98.2	104.1
P10646	Tissue factor pathway inhibitor [OS=Homo sapiens]	5	1	1	1	304	35	8.25	3.12	1	TFPI	79.6	114.8	96.9	121.8	117.2	101.6	99.6	94.3	81.9	92.3
P10746	Uroporphyrinogen-III synthase [OS=Homo sapiens]	17	4	5	4	265	28.6	5.48	11.3	4	UROS	105.9	72.5	110.5	90.8	106.1	96.1	101.8	84.9	118.3	113.1
P10768	S-formylglutathione hydrolase [OS=Homo sapiens]	38	8	32	8	282	31.4	7.02	89.96	8	ESD	95.5	98.9	97.5	102.9	105.9	99.5	96.4	102.7	100	100.5
P10809	60 kDa heat shock protein, mitochondrial [OS=Homo sapiens]	71	42	382	42	573	61	5.87	1066.9	42	HSPD1	102.7	104.1	102.7	93.5	89	103.8	101.5	101.5	100.9	100.3
P11021	Endoplasmic reticulum chaperone BiP [OS=Homo sapiens]	64	51	575	48	654	72.3	5.16	1570.98	51	HSPA5	101.3	100.8	99.6	102.4	107.3	98.2	92.5	93.2	101.4	103.2
P11047	Laminin subunit gamma-1 [OS=Homo sapiens]	24	30	56	30	1609	177.5	5.12	150.11	30	LAMC1	97.3	101.7	102.7	95.1	90.3	104.3	101.6	100	102.2	104.8
P11142	Heat shock cognate 71 kDa protein [OS=Homo sapiens]	71	53	896	32	646	70.9	5.52	2147.25	53	HSPA8	102.1	103.6	101.3	102.4	105.9	97.9	98.9	96.8	96	95.1
P11166	Solute carrier family 2, facilitated glucose transporter member 1 [OS=Homo sapiens]	12	5	30	4	492	54	8.72	64.17	5	SLC2A1	123.8	104.6	105.1	86.6	107.2	92.5	93	87.1	93.3	106.8
P11171	Protein 4.1 [OS=Homo sapiens]	5	4	4	4	864	97	5.58	4.96	4	EPB41	104.2	88.7	96.6	100.6	127.7	100.2	80.4	82.9	101.5	117.2
P11172	Uridine 5'-monophosphate synthase [OS=Homo sapiens]	19	9	12	9	480	52.2	7.24	32.04	9	UMPS	103.2	110.6	98.4	107.9	106.1	102.6	97.4	95.7	90.3	88
P11177	Pyruvate dehydrogenase E1 component subunit beta, mitochondrial [OS=Homo sapiens]	35	10	43	10	359	39.2	6.65	105.74	10	PDHB	103.2	100	101	97.9	91.9	102.9	103.3	98.6	106	95.2
P11182	Lipoamide acyltransferase component of branched-chain alpha-keto acid dehydrogenase complex, mitochondrial [OS=Homo sapiens]	9	4	5	4	482	53.5	8.51	2.05	4	DBT	102.1	105.2	103.2	93.3	105.8	80.9	102.5	115.6	110	81.4
P11216	Glycogen phosphorylase, brain form [OS=Homo sapiens]	52	43	187	34	843	96.6	6.86	417.86	43	PYGB	102.1	96.3	104.6	111	107	93	94.6	96.8	98.6	96
P11217	Glycogen phosphorylase, muscle form [OS=Homo sapiens]	14	11	37	2	842	97	7.03	69.84	11	PYGM	104.4	99.1	101.2	105.7	117.8	92.3	104.3	99.5	91.6	84
P11233	Ras-related protein Ral-A [OS=Homo sapiens]	29	7	10	6	206	23.6	7.11	28.37	7	RALA	107.6	101.3	96.4	97.1	110.3	94.8	92.5	91.3	97	111.8
P11234	Ras-related protein Ral-B [OS=Homo sapiens]	16	3	6	2	206	23.4	6.62	14.78	3	RALB	115.5	92.4	103.7	95.8	108.8	90.9	99.9	96.5	99.5	97.1
P11274	Breakpoint cluster region protein [OS=Homo sapiens]	11	10	13	9	1271	142.7	7.03	29.94	10	BCR	98.6	92.2	101.8	106.5	116.3	95.2	90	98.3	111.7	89.3
P11279	Lysosome-associated membrane glycoprotein 1 [OS=Homo sapiens]	8	4	16	4	417	44.9	8.75	21.83	4	LAMP1	100	97.3	93.1	88.3	103	96.8	95.7	96.1	113.9	115.9
P11310	Medium-chain specific acyl-CoA dehydrogenase, mitochondrial [OS=Homo sapiens]	37	16	36	16	421	46.6	8.37	86.21	16	ACADM	103.6	102.4	106.8	104.8	94.7	99.5	96.2	98.1	97.4	96.5
P11387	DNA topoisomerase 1 [OS=Homo sapiens]	40	34	133	34	765	90.7	9.31	228.34	34	TOP1	101.1	98.2	105.4	99.9	95.2	100.5	102	100.4	96.6	100.8
P11388	DNA topoisomerase 2-alpha [OS=Homo sapiens]	33	49	142	36	1531	174.3	8.72	295.74	49	TOP2A	112.5	112.9	112.6	77	69	110.5	118.8	112	87.8	86.8
P11413	Glucose-6-phosphate 1-dehydrogenase [OS=Homo sapiens]	45	21	96	21	515	59.2	6.84	217.71	21	G6PD	87.1	84.9	86.1	114	114	96.6	94.6	101.5	108.4	112.7
P11441	Ubiquitin-like protein 4A [OS=Homo sapiens]	31	4	7	4	157	17.8	8.66	19.52	4	UBL4A	108	102.2	99.6	94.8	118.5	89.5	97.8	92.1	99.7	97.8
P11473	Vitamin D3 receptor [OS=Homo sapiens]	2	1	1	1	427	48.3	6.52	1.97	1	VDR	97.9	88.8	87.6	98.8	103.1	110.1	100.5	94.6	110.9	107.6
P11498	Pyruvate carboxylase, mitochondrial [OS=Homo sapiens]	35	35	80	35	1178	129.6	6.84	185.66	35	PC	102.8	101.4	103.5	106.9	96.9	95.2	91.1	93.5	107.1	101.5
P11586	C-1-tetrahydrofolate synthase, cytoplasmic [OS=Homo sapiens]	54	53	231	52	935	101.5	7.3	510.94	53	MTHFD1	105.8	102.7	102.3	100.5	103.7	98.5	99.4	98	95.2	93.9
P11717	Cation-independent mannose-6-phosphate receptor [OS=Homo sapiens]	19	39	59	39	2491	274.2	5.94	110.11	39	IGF2R	116.8	98.7	101.8	105.3	114.3	89.4	84.1	83.9	100.1	105.7
P11766	Alcohol dehydrogenase class-3 [OS=Homo sapiens]	38	14	64	14	374	39.7	7.49	148.58	14	ADH5	93.2	90.3	95.5	111	112.5	97.2	95.8	102.4	99.5	102.8
P11831	Serum response factor [OS=Homo sapiens]	2	1	1	1	508	51.6	8.1	1.67	1	SRF	76.8	99.4	103.5	85.4	80.3	92.3	111	119.1	120.6	111.7
P11908	Ribose-phosphate pyrophosphokinase 2 [OS=Homo sapiens]	41	11	25	3	318	34.7	6.61	62.05	11	PRPS2	104	90.3	99.6	95.8	109.4	106.2	99.7	94.8	95.3	104.9
P11940	Polyadenylate-binding protein 1 [OS=Homo sapiens]	53	37	257	26	636	70.6	9.5	538	37	PABPC1	104.2	103.5	103.1	99.4	100.1	100.1	100.9	98.2	93.8	96.7
P12004	Proliferating cell nuclear antigen [OS=Homo sapiens]	71	16	169	16	261	28.8	4.69	534.04	16	PCNA	98.1	102.3	99.1	98.8	100.1	102.2	98.2	102.4	98.6	100.1
P12081	Histidine--tRNA ligase, cytoplasmic [OS=Homo sapiens]	42	24	84	20	509	57.4	5.88	168.86	24	HARS1	99.9	99.6	101.1	109.4	109.3	95.1	95.3	96.5	95.3	98.5
P12109	Collagen alpha-1(VI) chain [OS=Homo sapiens]	7	6	7	6	1028	108.5	5.43	10.62	6	COL6A1	92.5	76.1	82.9	86.3	60.6	126.6	108.8	119.4	143.1	103.7
P12235	ADP/ATP translocase 1 [OS=Homo sapiens]	50	16	61	2	298	33	9.76	134.61	16	SLC25A4	101.3	91.9	102.2	106.6	94	100.5	107.4	98.9	107.7	89.7
P12236	ADP/ATP translocase 3 [OS=Homo sapiens]	57	19	92	2	298	32.8	9.74	200.53	19	SLC25A6	94.9	98.7	100.2	98.4	83.1	106.6	112.8	108.4	108.6	88.4
P12268	Inosine-5'-monophosphate dehydrogenase 2 [OS=Homo sapiens]	48	24	127	20	514	55.8	6.9	334.43	24	IMPDH2	133.8	97.5	97.6	88.2	131.4	90.5	91.3	85.9	85.4	98.6
P12270	Nucleoprotein TPR [OS=Homo sapiens]	42	99	255	98	2363	267.1	5.02	539.7	99	TPR	101.8	103.5	103.5	94.9	92.2	102.2	102.8	101.4	100.2	97.5
P12277	Creatine kinase B-type [OS=Homo sapiens]	36	11	46	11	381	42.6	5.59	144.72	11	CKB	104.4	98.6	102.4	103.2	104.8	96.7	96.9	101.2	92.8	98.9
P12429	Annexin A3 [OS=Homo sapiens]	54	20	112	20	323	36.4	5.92	271.04	20	ANXA3	106.5	105.3	100.3	105.8	110.4	95.4	94	91.4	97.4	93.6
P12814	Alpha-actinin-1 [OS=Homo sapiens]	65	56	499	32	892	103	5.41	1186.64	56	ACTN1	99.8	96.6	97.1	91	97.9	102.3	105.4	104.4	103.1	102.5
P12955	Xaa-Pro dipeptidase [OS=Homo sapiens]	25	11	30	11	493	54.5	6	66.73	11	PEPD	93.5	96.2	95.7	108.1	106.3	97.4	95.3	101.9	103.4	102.2
P12956	X-ray repair cross-complementing protein 6 [OS=Homo sapiens]	61	44	238	43	609	69.8	6.64	505.63	44	XRCC6	97.6	99	100.9	99.5	98.3	101	102.2	101.4	99.6	100.5
P13010	X-ray repair cross-complementing protein 5 [OS=Homo sapiens]	41	34	198	34	732	82.7	5.81	472.37	34	XRCC5	97.5	97.3	99.2	102.2	99.3	102.1	102.5	102.6	97.8	99.4
P13051	Uracil-DNA glycosylase [OS=Homo sapiens]	10	1	1	1	313	34.6	9.32	2.79	1	UNG	143.2	114.2	125.5	89.8	86.2	86	92.7	80.1	91	91.1
P13056	Nuclear receptor subfamily 2 group C member 1 [OS=Homo sapiens]	3	2	2	1	603	67.3	6.32	2.63	2	NR2C1	128.1	111.1	89.3	133.5	50.8	95.7	114.5	115.9	78.2	83
P13073	Cytochrome c oxidase subunit 4 isoform 1, mitochondrial [OS=Homo sapiens]	31	6	43	6	169	19.6	9.51	103.17	6	COX4I1	93.6	103.6	101.5	93.2	85.4	106.4	102.4	104.8	104.6	104.6
P13473	Lysosome-associated membrane glycoprotein 2 [OS=Homo sapiens]	4	2	5	2	410	44.9	5.63	11	2	LAMP2	92.5	96.9	88.1	108.6	96.5	103.1	86.3	102.2	108.4	117.4
P13489	Ribonuclease inhibitor [OS=Homo sapiens]	57	22	124	22	461	49.9	4.82	337.98	22	RNH1	99.1	96.9	98.8	106.4	104.1	99.7	97.2	99.3	99.9	98.7
P13611	Versican core protein [OS=Homo sapiens]	0	1	1	1	3396	372.6	4.51	0	1	VCAN	114.4	91.9	81.8	105.1	106.7	105.9	100.2	98.1	98.5	97.5
P13639	Elongation factor 2 [OS=Homo sapiens]	61	55	544	54	858	95.3	6.83	1238.88	55	EEF2	100.2	102	99	99.4	104.3	99.5	102.1	99.6	97.3	96.6
P13667	Protein disulfide-isomerase A4 [OS=Homo sapiens]	54	41	236	41	645	72.9	5.07	460.03	41	PDIA4	100.3	98	98.7	102.6	104.1	99.2	95.5	96.4	102.8	102.5
P13674	Prolyl 4-hydroxylase subunit alpha-1 [OS=Homo sapiens]	33	14	39	14	534	61	6.01	91	14	P4HA1	92.3	93.2	97.3	97.3	91.8	102.6	99.4	106.3	111.4	108.5
P13693	Translationally-controlled tumor protein [OS=Homo sapiens]	45	8	118	8	172	19.6	4.93	266.77	8	TPT1	94.2	103.9	98.3	101.7	100.3	103.1	107.3	103.9	94.6	92.6
P13716	Delta-aminolevulinic acid dehydratase [OS=Homo sapiens]	9	2	4	2	330	36.3	6.79	2.85	2	ALAD	102.9	77.9	90.9	95.4	93.9	107.8	91.3	90.9	107.7	141.2
P13726	Tissue factor [OS=Homo sapiens]	27	6	16	6	295	33	7.03	40.03	6	F3	125.5	118.4	108.9	97.9	105.4	91.6	96.1	86	80.8	89.4
P13747	HLA class I histocompatibility antigen, alpha chain E [OS=Homo sapiens]	6	2	5	1	358	40	5.83	10.87	2	HLA-E	127.8	102.1	107.3	87.5	102.7	91.3	89.3	90.1	102.2	99.8
P13796	Plastin-2 [OS=Homo sapiens]	12	7	39	2	627	70.2	5.43	86.79	7	LCP1	107.1	110	88.8	135.9	166.8	94.1	73.1	75	61	88.1
P13797	Plastin-3 [OS=Homo sapiens]	45	30	189	23	630	70.8	5.6	442.79	30	PLS3	100.4	95.1	96.9	104.1	110.3	96.1	98.8	99.1	99.7	99.6
P13798	Acylamino-acid-releasing enzyme [OS=Homo sapiens]	27	15	49	15	732	81.2	5.48	124.1	15	APEH	97.7	96.5	97.5	107.9	106	100.5	96.9	99.3	95.5	102.3
P13804	Electron transfer flavoprotein subunit alpha, mitochondrial [OS=Homo sapiens]	55	14	57	14	333	35.1	8.38	148.78	14	ETFA	97.8	103.4	98.6	102.9	95.1	98.5	98.4	98.3	103.6	103.4
P13807	Glycogen [starch] synthase, muscle [OS=Homo sapiens]	11	5	9	5	737	83.7	6.18	21.94	5	GYS1	98.6	108	112.3	103.4	101.6	94.3	95.9	95.1	94.2	96.8
P13861	cAMP-dependent protein kinase type II-alpha regulatory subunit [OS=Homo sapiens]	49	17	50	17	404	45.5	5.07	128.7	17	PRKAR2A	97.7	100.7	95.3	104.3	97.1	104.4	97.7	101.7	99.9	101.3
P13984	General transcription factor IIF subunit 2 [OS=Homo sapiens]	49	10	19	10	249	28.4	9.23	28.72	10	GTF2F2	105.1	108	96.7	100.2	102.6	101.9	93.6	100.7	96.3	95
P13987	CD59 glycoprotein [OS=Homo sapiens]	25	4	33	4	128	14.2	6.48	81.42	4	CD59	109.4	105.6	110.6	104	99.5	93.9	89.9	93.5	95.9	97.8
P13995	Bifunctional methylenetetrahydrofolate dehydrogenase/cyclohydrolase, mitochondrial [OS=Homo sapiens]	12	3	4	3	350	37.9	8.73	2	3	MTHFD2	93.9	103.2	93.5	77.8	65.2	124.2	112.5	115.1	107.8	106.7
P14174	Macrophage migration inhibitory factor [OS=Homo sapiens]	41	4	37	4	115	12.5	7.88	93.73	4	MIF	89.9	104.6	97.5	103.1	99.3	99.2	101.9	102.8	97.3	104.3
P14314	Glucosidase 2 subunit beta [OS=Homo sapiens]	42	24	139	23	528	59.4	4.41	345.31	24	PRKCSH	104.5	103.5	102.3	99.8	96.1	98.2	97.7	93.9	103.4	100.6
P14316	Interferon regulatory factor 2 [OS=Homo sapiens]	14	3	4	3	349	39.3	7.52	9.14	3	IRF2	91.6	97.3	100.1	100.7	101.6	105.3	103.7	106.1	95.6	98
P14317	Hematopoietic lineage cell-specific protein [OS=Homo sapiens]	9	5	7	4	486	54	4.81	5.12	5	HCLS1	107.1	81.8	128.4	104.9	111.3	91.7	92.2	89.2	99.2	94.1
P14324	Farnesyl pyrophosphate synthase [OS=Homo sapiens]	18	9	25	9	419	48.2	6.15	53.08	9	FDPS	93.4	87.4	90.5	116.7	106.7	97.8	99.9	98.2	102.8	106.7
P14406	Cytochrome c oxidase subunit 7A2, mitochondrial [OS=Homo sapiens]	16	1	6	1	83	9.4	9.76	13.7	1	COX7A2	108.7	103	110.7	102.2	85.8	93.1	95.7	97.8	96.8	106.2
P14550	Aldo-keto reductase family 1 member A1 [OS=Homo sapiens]	34	10	34	9	325	36.6	6.79	82.13	10	AKR1A1	90	85.5	94.8	111.1	116.9	99.2	96.3	99.7	99.9	106.6
P14618	Pyruvate kinase PKM [OS=Homo sapiens]	78	50	769	50	531	57.9	7.84	2150.3	50	PKM	94	90.6	94.3	104.4	102.1	100.6	99.7	104.7	104.3	105.4
P14621	Acylphosphatase-2 [OS=Homo sapiens]	15	2	2	2	99	11.1	9.5	3.99	2	ACYP2	94.7	91.3	108.9	107.8	114.6	90.6	84.3	104.5	106.4	96.9
P14625	Endoplasmin [OS=Homo sapiens]	56	55	339	53	803	92.4	4.84	795.48	55	HSP90B1	103.6	99.6	102	104.5	106.6	94.8	94.2	92.3	101.3	101.1
P14635	G2/mitotic-specific cyclin-B1 [OS=Homo sapiens]	13	5	14	5	433	48.3	7.47	29.75	5	CCNB1	114	121.1	109.3	76.8	71.1	108.4	115.4	107	89.5	87.5
P14649	Myosin light chain 6B [OS=Homo sapiens]	34	6	36	4	208	22.8	5.73	72.35	6	MYL6B	92.4	99	98	99.5	100.9	97.9	107.3	97.3	101	106.8
P14678	Small nuclear ribonucleoprotein-associated proteins B and B' [OS=Homo sapiens]	35	7	39	7	240	24.6	11.19	83.24	7	SNRPB	105.1	104.8	101.7	90.9	91	98.8	102.6	99.1	101.1	105
P14735	Insulin-degrading enzyme [OS=Homo sapiens]	15	17	36	17	1019	117.9	6.61	82.88	17	IDE	101.2	93.6	102.5	117.6	111.7	94.2	98.7	93.2	97.1	90.2
P14854	Cytochrome c oxidase subunit 6B1 [OS=Homo sapiens]	76	6	22	6	86	10.2	7.05	61.6	6	COX6B1	110	116.1	114.7	96.7	92.8	90.2	94	93.3	96.7	95.4
P14859	POU domain, class 2, transcription factor 1 [OS=Homo sapiens]	11	4	4	3	743	76.4	6.81	13.08	4	POU2F1	100.4	116.3	85.3	123.5	80.6	93.7	81.7	107.3	94.6	116.6
P14866	Heterogeneous nuclear ribonucleoprotein L [OS=Homo sapiens]	49	26	213	25	589	64.1	8.22	557.08	26	HNRNPL	99.1	97.8	99.5	93.5	87.7	105.9	107.7	106.1	102.4	100.3
P14868	Aspartate--tRNA ligase, cytoplasmic [OS=Homo sapiens]	57	27	119	27	501	57.1	6.55	225.68	27	DARS1	97.6	95	98.1	105.4	101.2	100.6	101.2	102.8	99	99.2
P14923	Junction plakoglobin [OS=Homo sapiens]	16	9	13	9	745	81.7	6.14	28.11	9	JUP	119.8	102.4	110.5	106.8	108.6	86.2	76.8	82.7	98.9	107.2
P14927	Cytochrome b-c1 complex subunit 7 [OS=Homo sapiens]	67	8	29	8	111	13.5	8.78	47.14	8	UQCRB	102.4	116	111.6	98.3	97.2	92.3	91	94.4	101.7	95.1
P15104	Glutamine synthetase [OS=Homo sapiens]	6	2	4	2	373	42	6.89	7.3	2	GLUL	89.9	99.2	107.4	112.2	110.7	98.1	85.4	90.6	100.5	106
P15121	Aldo-keto reductase family 1 member B1 [OS=Homo sapiens]	44	12	38	11	316	35.8	6.98	50.17	12	AKR1B1	81.2	77	81.7	101.3	100.1	105.2	109.9	109.9	117.3	116.4
P15151	Poliovirus receptor [OS=Homo sapiens]	12	4	10	4	417	45.3	6.52	14.62	4	PVR	111	119	98.1	103.5	94.4	92.3	96.5	88.3	95.7	101.1
P15153	Ras-related C3 botulinum toxin substrate 2 [OS=Homo sapiens]	29	6	35	1	192	21.4	7.61	80.94	6	RAC2	99.9	99.6	99.2	109.1	107.6	93.5	92.4	96.3	99.9	102.5
P15170	Eukaryotic peptide chain release factor GTP-binding subunit ERF3A [OS=Homo sapiens]	39	18	48	5	499	55.7	5.62	99.26	18	GSPT1	102.2	101	100.9	104.2	106.8	96.1	100.8	97.5	96.3	94.1
P15291	Beta-1,4-galactosyltransferase 1 [OS=Homo sapiens]	7	2	2	2	398	43.9	8.65	4.94	2	B4GALT1	112.5	104.8	100.2	102.2	92.3	108.6	83.9	92.6	77.9	125
P15311	Ezrin [OS=Homo sapiens]	62	52	303	40	586	69.4	6.27	592.04	52	EZR	99.2	103.3	96.4	99.7	104.3	99.2	97.5	100.2	101	99.1
P15336	Cyclic AMP-dependent transcription factor ATF-2 [OS=Homo sapiens]	10	5	8	2	505	54.5	7.88	10.7	5	ATF2	99.5	99.7	106.3	100.9	81.6	112.1	106.2	93.6	86.2	113.8
P15374	Ubiquitin carboxyl-terminal hydrolase isozyme L3 [OS=Homo sapiens]	44	9	48	9	230	26.2	4.92	99.11	9	UCHL3	92.3	93.4	90.4	93.7	96.7	104.5	107.3	104.4	107.4	110
P15407	Fos-related antigen 1 [OS=Homo sapiens]	27	5	12	5	271	29.4	8.02	33.1	5	FOSL1	107.1	115.6	104.2	99.6	101.5	103.6	101.7	95.2	87.1	84.4
P15408	Fos-related antigen 2 [OS=Homo sapiens]	19	5	5	5	326	35.2	7.49	9.23	5	FOSL2	100.8	106.1	98.4	116.6	98.9	94.8	102.4	96.1	88.3	97.6
P15529	Membrane cofactor protein [OS=Homo sapiens]	9	4	5	4	392	43.7	6.74	8.49	4	CD46	104.4	99.6	100	102.4	110.3	93.2	92.5	89.8	106.8	100.9
P15531	Nucleoside diphosphate kinase A [OS=Homo sapiens]	58	9	90	4	152	17.1	6.19	118.06	9	NME1	105.7	89.9	109.1	97.9	113.2	89	101.1	94.3	97.3	102.5
P15559	NAD(P)H dehydrogenase [quinone] 1 [OS=Homo sapiens]	9	3	3	3	274	30.8	8.88	2.17	3	NQO1	63.9	45.9	65.3	108	117.3	106.1	89.4	100.1	131.4	172.5
P15586	N-acetylglucosamine-6-sulfatase [OS=Homo sapiens]	17	9	24	9	552	62	8.31	50.55	9	GNS	95.7	99.3	98.6	106.9	101.2	99.6	92.2	95.6	111.1	99.8
P15822	Zinc finger protein 40 [OS=Homo sapiens]	1	4	4	3	2718	296.7	7.84	7.53	4	HIVEP1	90.3	93.8	92.6	95.7	102.5	99.5	107	103.1	105.4	110.2
P15880	40S ribosomal protein S2 [OS=Homo sapiens]	53	18	184	18	293	31.3	10.24	413.62	18	RPS2	99.4	100.1	100.6	96.4	94.3	104.8	105	103.2	97.2	98.9
P15923	Transcription factor E2-alpha [OS=Homo sapiens]	10	5	6	5	654	67.6	6.47	17.04	5	TCF3	107.7	109.4	113.3	93.3	87.3	104.9	97.9	101.1	94	91.1
P15924	Desmoplakin [OS=Homo sapiens]	11	30	45	30	2871	331.6	6.81	90.93	30	DSP	142.1	140.2	140.3	118.4	110.9	71.3	72.1	69.9	68.3	66.6
P15927	Replication protein A 32 kDa subunit [OS=Homo sapiens]	50	8	34	8	270	29.2	6.15	82.8	8	RPA2	101.7	101.6	97.4	97.9	94.9	103.8	102.6	108.1	87.8	104.3
P15954	Cytochrome c oxidase subunit 7C, mitochondrial [OS=Homo sapiens]	38	3	14	2	63	7.2	10.27	23.79	3	COX7C	100.4	106.9	99.1	98	85.1	102.5	105	103.1	101.9	98
P16035	Metalloproteinase inhibitor 2 [OS=Homo sapiens]	11	3	3	3	220	24.4	7.49	4.93	3	TIMP2	124.5	98.5	93.9	134.4	127	70.5	79.9	76.2	93	102
P16070	CD44 antigen [OS=Homo sapiens]	16	12	100	12	742	81.5	5.33	212.74	12	CD44	107.9	105.1	99.2	94.5	97.9	99.3	98.7	93.8	99	104.6
P16083	Ribosyldihydronicotinamide dehydrogenase [quinone] [OS=Homo sapiens]	41	6	9	6	231	25.9	6.29	26.39	6	NQO2	94.5	92.1	102.5	121.2	130.5	85.8	86.7	88.2	97.6	101
P16104	Histone H2AX [OS=Homo sapiens]	51	11	118	5	143	15.1	10.74	210.12	11	H2AX	118	115	118.4	112	99.5	86	95.4	86.4	87.6	81.7
P16144	Integrin beta-4 [OS=Homo sapiens]	28	45	111	45	1822	202	6.09	296.74	45	ITGB4	106.1	99.2	102	95.5	86.3	101.5	93	95.5	110	110.8
P16152	Carbonyl reductase [NADPH] 1 [OS=Homo sapiens]	76	19	76	16	277	30.4	8.32	186.4	19	CBR1	94.8	97.7	100.2	116.1	118	92.1	89.4	92.7	97.9	101.1
P16157	Ankyrin-1 [OS=Homo sapiens]	5	8	8	8	1881	206.1	6.01	18.78	8	ANK1	103.9	105.3	94.7	89.4	91.8	103.8	98.7	110.8	99.4	102.3
P16220	Cyclic AMP-responsive element-binding protein 1 [OS=Homo sapiens]	16	3	12	2	327	35.1	5.27	34.79	3	CREB1	97.5	100.1	97.6	89.6	91.9	104.2	96.6	105	106.4	111
P16278	Beta-galactosidase [OS=Homo sapiens]	12	6	13	6	677	76	6.57	28.91	6	GLB1	93.5	100.9	98.6	98.7	97.7	98.1	99	96.6	105.6	111.2
P16298	Serine/threonine-protein phosphatase 2B catalytic subunit beta isoform [OS=Homo sapiens]	9	5	11	1	524	59	5.91	26.2	5	PPP3CB	87	119.4	87.2	117	113.8	102	90.5	94.3	100.7	88.3
P16333	Cytoplasmic protein NCK1 [OS=Homo sapiens]	12	4	6	4	377	42.8	6.47	9.38	4	NCK1	101.4	99.5	98.5	101.7	97.3	101.7	102.1	96.8	99.6	101.5
P16383	Intron Large complex component GCFC2 [OS=Homo sapiens]	4	2	2	2	781	89.3	5.99	6.49	2	GCFC2	101	106.8	104.3	101	99.6	107.1	86.4	91.5	95.6	106.8
P16402	Histone H1.3 [OS=Homo sapiens]	30	14	220	1	221	22.3	11.02	412.15	14	H1-3	101.5	94.4	117.6	105.2	111.7	93	97.1	95.5	101.9	82.1
P16403	Histone H1.2 [OS=Homo sapiens]	48	21	248	7	213	21.4	10.93	403.59	21	H1-2	94	99.4	101.5	83	78.3	113.4	111.9	111.8	106.2	100.6
P16422	Epithelial cell adhesion molecule [OS=Homo sapiens]	5	1	2	1	314	34.9	7.46	3.43	1	EPCAM	120	99.2	85.5	91.8	113	94.7	114	95.2	95.3	91.2
P16435	NADPH--cytochrome P450 reductase [OS=Homo sapiens]	22	12	23	12	677	76.6	5.58	66.73	12	POR	84.8	94.2	94.9	108.4	101.8	100.1	98.2	95.8	104.4	117.3
P16591	Tyrosine-protein kinase Fer [OS=Homo sapiens]	4	2	2	2	822	94.6	7.14	3.52	2	FER	117.6	87.7	96.5	79.2	107	112.1	116.1	92.6	86.9	104.3
P16615	Sarcoplasmic/endoplasmic reticulum calcium ATPase 2 [OS=Homo sapiens]	35	36	144	36	1042	114.7	5.34	346.34	36	ATP2A2	104.9	102.1	107	97.4	96.3	97.8	96.9	96.8	98.1	102.7
P16930	Fumarylacetoacetase [OS=Homo sapiens]	15	5	16	5	419	46.3	6.95	25.86	5	FAH	88.4	88.6	90.6	111.4	110.2	100.7	102.6	103.9	98	105.6
P16949	Stathmin [OS=Homo sapiens]	65	21	213	19	149	17.3	5.97	420.04	21	STMN1	86.9	98.3	92.1	97.8	96.1	106.9	100.1	107.2	110.8	103.9
P16989	Y-box-binding protein 3 [OS=Homo sapiens]	42	15	55	8	372	40.1	9.77	152.58	15	YBX3	105.9	105.4	105	100.2	97.2	102.3	100.9	99.7	94.2	89.3
P17010	Zinc finger X-chromosomal protein [OS=Homo sapiens]	4	3	3	3	805	90.5	6.14	5.77	3	ZFX	100	86.6	99.9	98.4	94.5	109	102.5	96.1	113.8	99.2
P17026	Zinc finger protein 22 [OS=Homo sapiens]	28	6	12	4	224	25.9	10.04	19.38	6	ZNF22	95.6	101.3	102.8	84.1	80.9	105.3	117.9	109.2	102.4	100.5
P17028	Zinc finger protein 24 [OS=Homo sapiens]	14	5	6	4	368	42.1	6.21	4.99	5	ZNF24	97.1	97.1	102.1	96.2	86	109.3	101.9	110.7	100.8	98.7
P17029	Zinc finger protein with KRAB and SCAN domains 1 [OS=Homo sapiens]	16	5	6	3	563	63.6	7.05	13.47	5	ZKSCAN1	85.2	91.5	106.3	99.6	93.9	105.3	95.3	108.8	110.7	103.5
P17096	High mobility group protein HMG-I/HMG-Y [OS=Homo sapiens]	63	10	83	10	107	11.7	10.32	191.2	10	HMGA1	94.8	110.2	106.2	104.6	86.9	101.3	94.6	99.6	104.7	97
P17174	Aspartate aminotransferase, cytoplasmic [OS=Homo sapiens]	39	14	32	14	413	46.2	7.01	91.78	14	GOT1	109.1	100.9	106.5	107.9	117.7	92.1	97.1	93.5	74.7	100.5
P17252	Protein kinase C alpha type [OS=Homo sapiens]	30	16	38	16	672	76.7	7.05	108.92	16	PRKCA	92	92.5	96.4	106.8	102.8	100.4	98.6	101.1	102.4	107
P17275	Transcription factor JunB [OS=Homo sapiens]	28	6	9	5	347	35.9	9.22	24.67	6	JUNB	85.1	91.1	116.8	108.1	101	97.9	102	97.3	112.5	88.2
P17301	Integrin alpha-2 [OS=Homo sapiens]	29	27	90	27	1181	129.2	5.25	236.55	27	ITGA2	103.4	91.9	106.3	109.3	109.9	89.4	89.2	90.4	107.2	102.9
P17480	Nucleolar transcription factor 1 [OS=Homo sapiens]	22	20	35	20	764	89.4	5.81	57.02	20	UBTF	102.1	103.1	106.1	91.7	83.6	109.7	105	103.8	97.3	97.7
P17535	Transcription factor JunD [OS=Homo sapiens]	23	5	12	4	347	35.2	7.37	38.38	5	JUND	88.7	107.3	105.5	111.1	116.5	96.6	84.4	87.8	101.6	100.5
P17544	Cyclic AMP-dependent transcription factor ATF-7 [OS=Homo sapiens]	18	8	15	5	483	51.7	8	27.78	8	ATF7	94.2	103.2	107.6	89.8	78.6	105.7	107.7	106.8	101.5	105
P17568	NADH dehydrogenase [ubiquinone] 1 beta subcomplex subunit 7 [OS=Homo sapiens]	15	2	2	2	137	16.4	8.92	4.6	2	NDUFB7	111.2	115.2	94.1	96.9	93.1	89.6	103.8	109.5	88.4	98.3
P17612	cAMP-dependent protein kinase catalytic subunit alpha [OS=Homo sapiens]	25	10	12	5	351	40.6	8.79	16.59	10	PRKACA	109	83.7	104.2	100.2	107.2	94.3	107.9	99.5	96.1	98
P17655	Calpain-2 catalytic subunit [OS=Homo sapiens]	49	28	146	27	700	79.9	4.98	448.06	28	CAPN2	93.6	92.8	101.2	103.1	103.1	103	96.3	104.2	101.1	101.7
P17676	CCAAT/enhancer-binding protein beta [OS=Homo sapiens]	14	4	6	4	345	36.1	8.31	13.13	4	CEBPB	86.4	82.9	100.6	97	104.9	110.6	106.4	106.3	98.2	106.6
P17706	Tyrosine-protein phosphatase non-receptor type 2 [OS=Homo sapiens]	14	5	7	5	415	48.4	8.29	9.38	5	PTPN2	99.1	91.1	96.6	95.9	89.1	98.9	96.7	98.1	111.1	123.3
P17707	S-adenosylmethionine decarboxylase proenzyme [OS=Homo sapiens]	10	3	3	3	334	38.3	6	4.32	3	AMD1	125.1	85.5	81.9	86.1	100.5	101	102.2	108.6	118.4	90.7
P17812	CTP synthase 1 [OS=Homo sapiens]	34	22	81	22	591	66.6	6.46	157.03	22	CTPS1	102.4	99.9	94.7	96.2	99.7	104.8	105.3	101	97.1	99
P17813	Endoglin [OS=Homo sapiens]	3	2	2	2	658	70.5	6.61	2.37	2	ENG	43.7	29.6	57.6	55.6	0	179.8	176.6	149.4	169.8	137.9
P17844	Probable ATP-dependent RNA helicase DDX5 [OS=Homo sapiens]	55	39	236	30	614	69.1	8.92	604.77	39	DDX5	98.6	98	99.3	95.2	90.3	105.4	106.8	106.3	99.9	100.3
P17858	ATP-dependent 6-phosphofructokinase, liver type [OS=Homo sapiens]	21	15	39	10	780	85	7.5	80.33	15	PFKL	95.8	91.3	99.5	108.2	100	98.8	99	100.7	102.5	104.2
P17931	Galectin-3 [OS=Homo sapiens]	35	9	58	9	250	26.1	8.56	106.72	9	LGALS3	92.4	96.2	96.8	104.6	100.6	98.6	95.5	103.3	109	103
P17980	26S proteasome regulatory subunit 6A [OS=Homo sapiens]	70	28	124	28	439	49.2	5.24	293.19	28	PSMC3	95.9	94.5	94.1	105.3	108.6	99.4	101.2	100	99	102
P17987	T-complex protein 1 subunit alpha [OS=Homo sapiens]	63	34	249	34	556	60.3	6.11	639.56	34	TCP1	99.5	96.5	99.2	103.8	105	99.5	101.6	98.6	99.3	97.1
P18031	Tyrosine-protein phosphatase non-receptor type 1 [OS=Homo sapiens]	37	14	38	14	435	49.9	6.27	76.05	14	PTPN1	98.1	93.9	96.8	90.1	86.8	105.7	109	103.9	106.2	109.5
P18074	General transcription and DNA repair factor IIH helicase subunit XPD [OS=Homo sapiens]	9	6	8	6	760	86.9	7.15	17.6	6	ERCC2	86	94.1	103.5	112.4	100.6	100.9	114.4	102.8	97.3	88.2
P18077	60S ribosomal protein L35a [OS=Homo sapiens]	73	15	59	15	110	12.5	11.06	53.88	15	RPL35A	105.8	102.6	106.5	95.8	91.5	101	107.6	99.3	94.5	95.4
P18084	Integrin beta-5 [OS=Homo sapiens]	7	4	7	4	799	88	6.06	18.46	4	ITGB5	103.2	101.4	105.3	109.8	109	88.6	87.9	85.8	105.7	103.2
P18085	ADP-ribosylation factor 4 [OS=Homo sapiens]	33	6	18	5	180	20.5	7.14	30.19	6	ARF4	101.1	98.1	100.3	111.4	89.3	105.2	98.1	108.8	82.9	105
P18124	60S ribosomal protein L7 [OS=Homo sapiens]	52	19	102	19	248	29.2	10.65	188.75	19	RPL7	102.4	98.9	100.3	97.1	99.9	101.1	102.4	100.1	94.4	103.4
P18206	Vinculin [OS=Homo sapiens]	55	67	294	67	1134	123.7	5.66	653.93	67	VCL	103.8	97.8	98.7	102.9	111.5	97.2	97	96.5	97.1	97.4
P18583	Protein SON [OS=Homo sapiens]	14	25	62	25	2426	263.7	5.64	151.01	25	SON	98.6	101.4	105.3	94.5	83.8	105.5	104.3	107.7	100.2	98.6
P18615	Negative elongation factor E [OS=Homo sapiens]	52	18	45	18	380	43.2	9.33	133	18	NELFE	97.2	109.7	99.8	101.6	99.5	99.3	96	101.1	100.1	95.7
P18621	60S ribosomal protein L17 [OS=Homo sapiens]	62	13	68	12	184	21.4	10.17	118.05	13	RPL17	98.1	107	102.4	96.8	92.3	105.7	102.7	102.3	95.3	97.4
P18669	Phosphoglycerate mutase 1 [OS=Homo sapiens]	60	19	259	19	254	28.8	7.18	798.13	19	PGAM1	92.6	99.1	97.8	103.3	104.4	100.3	98.2	102.7	102.3	99.4
P18754	Regulator of chromosome condensation [OS=Homo sapiens]	47	13	42	12	421	44.9	7.52	114.88	13	RCC1	96.6	97.2	99.1	93.2	89.1	105.9	108.1	106.7	103.1	100.9
P18827	Syndecan-1 [OS=Homo sapiens]	12	3	8	3	310	32.4	4.63	25.98	3	SDC1	97.6	95.9	112	105.6	79.9	107.7	108.6	99.9	99.5	93.3
P18846	Cyclic AMP-dependent transcription factor ATF-1 [OS=Homo sapiens]	16	3	9	2	271	29.2	8.37	22.9	3	ATF1	102.2	102.9	101.7	94.9	88.3	101.1	105.3	103.8	102.3	97.6
P18858	DNA ligase 1 [OS=Homo sapiens]	32	24	38	24	919	101.7	5.62	77.9	24	LIG1	104	100.4	102	97.4	94	103.4	108.5	101.8	95.3	93.2
P18859	ATP synthase-coupling factor 6, mitochondrial [OS=Homo sapiens]	47	5	22	5	108	12.6	9.52	57.73	5	ATP5PF	89.2	102.9	98.2	94.3	82.8	105.1	110.4	108.4	107.4	101.4
P18887	DNA repair protein XRCC1 [OS=Homo sapiens]	22	13	20	13	633	69.5	6.28	41.63	13	XRCC1	90.1	99.5	94.9	97.7	95.4	105.6	99.5	107.3	107.5	102.6
P19174	1-phosphatidylinositol 4,5-bisphosphate phosphodiesterase gamma-1 [OS=Homo sapiens]	13	13	24	13	1290	148.4	6.05	63.99	13	PLCG1	101.1	105	100.5	103.9	109.8	93.8	100.5	97.6	94.1	93.7
P19256	Lymphocyte function-associated antigen 3 [OS=Homo sapiens]	13	3	6	3	250	28.1	6.76	8.81	3	CD58	102.8	107.2	87.5	98.6	92.9	98.7	102.3	107.9	104.4	97.7
P19338	Nucleolin [OS=Homo sapiens]	66	66	422	66	710	76.6	4.7	756.74	66	NCL	101.9	102.9	100.8	96.1	95.3	103.4	104.5	101	95.9	98.2
P19367	Hexokinase-1 [OS=Homo sapiens]	37	32	92	31	917	102.4	6.8	208.57	32	HK1	101	98	100.9	99.9	101.8	96.6	98.4	97.1	102.4	104
P19387	DNA-directed RNA polymerase II subunit RPB3 [OS=Homo sapiens]	40	7	18	7	275	31.4	4.92	54.81	7	POLR2C	98.4	95.5	97.9	96.1	84.5	105.7	112.1	104.7	104	101.3
P19388	DNA-directed RNA polymerases I, II, and III subunit RPABC1 [OS=Homo sapiens]	32	7	10	7	210	24.5	5.95	17.2	7	POLR2E	97.9	105.1	108.3	96.3	100.2	97.3	95.8	94.6	105.8	98.8
P19404	NADH dehydrogenase [ubiquinone] flavoprotein 2, mitochondrial [OS=Homo sapiens]	46	9	31	9	249	27.4	8.06	78.93	9	NDUFV2	115.2	102.6	104.4	91.7	80	104.2	102.2	100.2	96.9	102.6
P19438	Tumor necrosis factor receptor superfamily member 1A [OS=Homo sapiens]	11	4	6	4	455	50.5	6.64	7.21	4	TNFRSF1A	91.6	78.5	89.3	105.1	95.4	103.3	93.6	111.1	117.3	115
P19447	General transcription and DNA repair factor IIH helicase subunit XPB [OS=Homo sapiens]	16	9	19	9	782	89.2	7.23	53.05	9	ERCC3	106.1	96	102.3	94	100	105.3	100	103.9	95.4	96.9
P19474	E3 ubiquitin-protein ligase TRIM21 [OS=Homo sapiens]	9	4	5	4	475	54.1	6.38	11.94	4	TRIM21	112.9	82.7	95.3	95.8	105.3	90.2	104.2	105.3	98.9	109.4
P19525	Interferon-induced, double-stranded RNA-activated protein kinase [OS=Homo sapiens]	21	10	26	10	551	62.1	8.4	41.6	10	EIF2AK2	106.2	94.7	111.3	102.5	97.3	102.1	100.3	98.1	91.2	96.1
P19532	Transcription factor E3 [OS=Homo sapiens]	3	2	3	2	575	61.5	5.58	7.53	2	TFE3	89.6	106.4	95.8	126.5	93.7	106.1	102.5	91.2	97.6	90.7
P19623	Spermidine synthase [OS=Homo sapiens]	21	5	20	5	302	33.8	5.49	47.6	5	SRM	111.9	105.2	112.6	109.2	110	91.5	97.4	88.4	89.1	84.7
P19784	Casein kinase II subunit alpha' [OS=Homo sapiens]	19	5	15	5	350	41.2	8.56	39.57	5	CSNK2A2	88.5	80.5	88.2	86.4	85.7	110.8	120.4	117.2	110.9	111.4
P19838	Nuclear factor NF-kappa-B p105 subunit [OS=Homo sapiens]	13	9	14	9	968	105.3	5.4	26.56	9	NFKB1	98.7	93.2	102.4	103.7	88.8	99.9	109.2	103	97.4	103.8
P20020	Plasma membrane calcium-transporting ATPase 1 [OS=Homo sapiens]	12	10	21	6	1220	134.6	5.91	66.57	10	ATP2B1	121.5	92.1	100.9	96.4	112.7	95.8	87.2	87	94.1	112.3
P20042	Eukaryotic translation initiation factor 2 subunit 2 [OS=Homo sapiens]	59	24	87	24	333	38.4	5.8	216.52	24	EIF2S2	98.8	101	98.5	97.9	96.6	103	107.7	103.3	95.9	97.3
P20073	Annexin A7 [OS=Homo sapiens]	39	18	63	16	488	52.7	5.68	150.7	18	ANXA7	93.4	97.1	95.5	109	106.2	99.7	94.1	97.9	104.4	102.8
P20248	Cyclin-A2 [OS=Homo sapiens]	16	4	9	4	432	48.5	6.54	22.25	4	CCNA2	104.4	102.4	104.7	88.3	84.7	108.4	104.9	105.5	94.3	102.3
P20290	Transcription factor BTF3 [OS=Homo sapiens]	79	17	125	15	206	22.2	9.38	371.25	17	BTF3	107.9	97.2	102.1	97.6	106.4	104.5	104.9	95.3	91.6	92.5
P20338	Ras-related protein Rab-4A [OS=Homo sapiens]	16	3	9	2	218	24.4	6.07	25.36	3	RAB4A	109.5	95.5	96.5	100.7	103.5	99.7	94.1	98.6	117.2	84.7
P20339	Ras-related protein Rab-5A [OS=Homo sapiens]	57	10	39	6	215	23.6	8.15	112.41	10	RAB5A	96.1	96	107.2	97.9	98.9	98.8	95.3	101.3	104.8	103.7
P20340	Ras-related protein Rab-6A [OS=Homo sapiens]	45	9	41	6	208	23.6	5.54	92.32	9	RAB6A	107	98.8	104.3	111.4	104.2	90.5	92.2	89.4	100.6	101.5
P20585	DNA mismatch repair protein Msh3 [OS=Homo sapiens]	5	5	8	5	1137	127.3	8.02	8.69	5	MSH3	100	96	106.9	95.3	108.4	96.2	100	103.6	102.8	90.8
P20618	Proteasome subunit beta type-1 [OS=Homo sapiens]	20	3	11	3	241	26.5	8.13	30.7	3	PSMB1	112.5	89.3	105	101.3	99.3	101.7	91	104.8	99.9	95.3
P20645	Cation-dependent mannose-6-phosphate receptor [OS=Homo sapiens]	30	7	12	7	277	31	5.83	22.4	7	M6PR	118.3	101.1	100.1	89.8	109.6	95	91.5	89.8	102.6	102.1
P20674	Cytochrome c oxidase subunit 5A, mitochondrial [OS=Homo sapiens]	21	4	30	4	150	16.8	6.79	61.14	4	COX5A	101.1	104.2	97.9	91.6	83.9	102	102.4	101.4	110.4	105.2
P20700	Lamin-B1 [OS=Homo sapiens]	65	45	238	40	586	66.4	5.16	508.6	45	LMNB1	100.1	97.9	101.3	90.8	83.6	106.2	105.9	107	103.8	103.3
P20810	Calpastatin [OS=Homo sapiens]	56	37	169	37	708	76.5	5.07	370.03	37	CAST	86.2	95.7	94.9	101	96.2	104.1	100.5	107.5	108.9	105
P20839	Inosine-5'-monophosphate dehydrogenase 1 [OS=Homo sapiens]	23	12	24	8	514	55.4	6.9	46.25	12	IMPDH1	104.8	92.4	96.8	90.8	116.1	98.7	96.6	94.8	99.3	109.7
P20908	Collagen alpha-1(V) chain [OS=Homo sapiens]	3	4	6	4	1838	183.4	5.06	9.98	4	COL5A1	111.8	103.4	116.1	87.1	73.2	108.9	94.2	104	103.4	98
P20930	Filaggrin [OS=Homo sapiens]	12	20	23	20	4061	434.9	9.25	50.41	20	FLG	58.8	82.3	66.7	65.2	75.4	154	136.1	140.7	96.5	124.1
P20933	N(4)-(beta-N-acetylglucosaminyl)-L-asparaginase [OS=Homo sapiens]	12	3	3	3	346	37.2	6.28	7.11	3	AGA	86.3	94.9	92.7	100.7	101.5	114.7	92.4	113.2	89.7	113.8
P20936	Ras GTPase-activating protein 1 [OS=Homo sapiens]	11	11	18	11	1047	116.3	6.54	22.01	11	RASA1	92	92.3	91.4	89.4	86.7	107.2	105.2	108.2	119.2	108.3
P20962	Parathymosin [OS=Homo sapiens]	24	5	40	5	102	11.5	4.16	71.22	5	PTMS	87.3	99.6	90	105.9	104.7	100.5	93.2	104.4	109.7	104.7
P21127	Cyclin-dependent kinase 11B [OS=Homo sapiens]	15	13	18	13	795	92.6	5.54	36.11	13	CDK11B	104	96.5	109.1	104.8	107.7	92.9	102.7	98.6	92.6	91.1
P21266	Glutathione S-transferase Mu 3 [OS=Homo sapiens]	28	7	16	6	225	26.5	5.54	39.29	7	GSTM3	121.9	104.1	114.9	131	123.4	80.3	80.6	78.7	76.1	89.1
P21281	V-type proton ATPase subunit B, brain isoform [OS=Homo sapiens]	39	17	57	17	511	56.5	5.81	140.13	17	ATP6V1B2	101.7	99.4	98.9	104.5	104.2	96.2	95.5	97	101.3	101.2
P21283	V-type proton ATPase subunit C 1 [OS=Homo sapiens]	23	10	18	10	382	43.9	7.46	31.63	10	ATP6V1C1	104.9	99.8	102.6	108.3	111.5	91.9	96.7	95	94.7	94.6
P21291	Cysteine and glycine-rich protein 1 [OS=Homo sapiens]	65	12	74	12	193	20.6	8.57	154.25	12	CSRP1	89.7	95.9	95.4	103.4	106.7	99.1	98.1	97.8	108.5	105.2
P21333	Filamin-A [OS=Homo sapiens]	71	183	1555	167	2647	280.6	6.06	4146.81	183	FLNA	94	98.8	94.7	102	107.2	100.6	99.9	100.6	98.9	103.4
P21397	Amine oxidase [flavin-containing] A [OS=Homo sapiens]	4	2	3	2	527	59.6	7.85	5.12	2	MAOA	95	115.5	99.4	99.3	94.4	103.7	96.7	105.3	98.1	92.6
P21399	Cytoplasmic aconitate hydratase [OS=Homo sapiens]	36	28	71	28	889	98.3	6.68	154.66	28	ACO1	96.5	91	96.1	100.7	100.4	98.7	101.9	103.5	101.8	109.5
P21589	5'-nucleotidase [OS=Homo sapiens]	52	25	120	25	574	63.3	7.03	308.78	25	NT5E	99.6	95.7	98.9	101.4	97	98.5	96.3	99.7	105.7	107.2
P21675	Transcription initiation factor TFIID subunit 1 [OS=Homo sapiens]	2	3	3	3	1872	212.5	5.07	1.61	3	TAF1	102.3	95.2	86.2	94.1	70.2	106.5	100.5	89.5	110.9	144.6
P21741	Midkine [OS=Homo sapiens]	14	2	3	2	143	15.6	9.79	5.77	2	MDK	103.1	114.2	135.8	125.9	56.8	85.2	93.3	102.9	95.6	87.2
P21796	Voltage-dependent anion-selective channel protein 1 [OS=Homo sapiens]	76	20	102	19	283	30.8	8.54	290.41	20	VDAC1	117.5	104.5	109.6	94.4	95.7	99	96.5	93.7	90.7	98.3
P21912	Succinate dehydrogenase [ubiquinone] iron-sulfur subunit, mitochondrial [OS=Homo sapiens]	36	12	35	12	280	31.6	8.76	66.96	12	SDHB	110.5	109.7	106.3	93.4	91.6	96.2	99.9	97	98.4	97.1
P21926	CD9 antigen [OS=Homo sapiens]	15	3	28	3	228	25.4	7.15	51.23	3	CD9	106.9	106.5	110.8	109.1	108.2	88.8	89.8	88.9	97.6	93.3
P21953	2-oxoisovalerate dehydrogenase subunit beta, mitochondrial [OS=Homo sapiens]	2	1	2	1	392	43.1	6.29	4.16	1	BCKDHB	86.2	105.3	68.6	114.7	60.1	122.2	127.3	124.1	106.7	84.7
P21964	Catechol O-methyltransferase [OS=Homo sapiens]	32	7	15	7	271	30	5.47	42.99	7	COMT	89.3	87	98	90	92.9	113.2	108.7	105.7	105.8	109.5
P21980	Protein-glutamine gamma-glutamyltransferase 2 [OS=Homo sapiens]	53	32	193	32	687	77.3	5.22	470.57	32	TGM2	99	98.7	99.2	97.3	96.5	101.1	100.5	103.9	103.5	100.3
P22033	Methylmalonyl-CoA mutase, mitochondrial [OS=Homo sapiens]	7	4	5	4	750	83.1	6.93	15.67	4	MMUT	93.8	97.1	95.7	99.1	85.3	103	98.8	105	109.5	112.6
P22059	Oxysterol-binding protein 1 [OS=Homo sapiens]	29	19	45	18	807	89.4	7.3	86.87	19	OSBP	97.5	88.1	91.1	109.8	103.1	101	96.3	103.8	107.8	101.5
P22061	Protein-L-isoaspartate(D-aspartate) O-methyltransferase [OS=Homo sapiens]	55	10	42	10	227	24.6	7.21	125.69	10	PCMT1	104.6	99	97.4	104	107.9	94.1	94.4	99.2	99	100.3
P22087	rRNA 2'-O-methyltransferase fibrillarin [OS=Homo sapiens]	43	16	49	16	321	33.8	10.18	88.89	16	FBL	104	103.3	110.1	93.8	86.9	102.9	109.4	101.9	93.2	94.5
P22102	Trifunctional purine biosynthetic protein adenosine-3 [OS=Homo sapiens]	50	43	146	43	1010	107.7	6.7	378.3	43	GART	102.1	100.1	99.2	101.6	102.1	99.8	102.1	97.9	98.2	96.9
P22234	Bifunctional phosphoribosylaminoimidazole carboxylase/phosphoribosylaminoimidazole succinocarboxamide synthetase [OS=Homo sapiens]	46	23	146	23	425	47	7.23	326.39	23	PAICS	96.5	102	98.3	100.3	102.2	101.9	99.2	100.5	102.1	97.2
P22307	Sterol carrier protein 2 [OS=Homo sapiens]	28	16	55	16	547	59	6.89	109.06	16	SCP2	96	93.3	96.6	91.4	91.2	102.9	102.3	103.3	112	111
P22314	Ubiquitin-like modifier-activating enzyme 1 [OS=Homo sapiens]	43	36	190	36	1058	117.8	5.76	504.91	36	UBA1	99.2	98.8	99.5	106	105.8	98.2	93	98.3	100.7	100.4
P22392	Nucleoside diphosphate kinase B [OS=Homo sapiens]	76	11	137	6	152	17.3	8.41	211.21	11	NME2	102.9	96.5	101.6	104.1	107.7	95.9	101	97.3	96.5	96.5
P22413	Ectonucleotide pyrophosphatase/phosphodiesterase family member 1 [OS=Homo sapiens]	22	15	35	15	925	104.9	7.14	85.6	15	ENPP1	105.7	93.7	96.9	85.9	81.2	106.8	106.5	104.8	109.1	109.3
P22415	Upstream stimulatory factor 1 [OS=Homo sapiens]	17	5	8	4	310	33.5	5.54	23.56	5	USF1	91.4	98.6	106.1	96	88.5	106.6	105.4	106.3	99.4	101.6
P22570	NADPH:adrenodoxin oxidoreductase, mitochondrial [OS=Homo sapiens]	14	5	6	5	491	53.8	8.44	10.77	5	FDXR	101.1	105.1	116.5	109.9	105.3	97.5	89.4	87.8	89.9	97.5
P22626	Heterogeneous nuclear ribonucleoproteins A2/B1 [OS=Homo sapiens]	67	27	368	24	353	37.4	8.95	814.37	27	HNRNPA2B1	97.3	95.6	97.8	96.5	85.4	104.5	107.7	107.9	103.1	104.2
P22670	MHC class II regulatory factor RFX1 [OS=Homo sapiens]	7	4	7	4	979	104.7	6.29	14.37	4	RFX1	87	86.9	106.2	91.9	103	111.2	96.5	108.2	104	105.2
P22676	Calretinin [OS=Homo sapiens]	27	7	14	7	271	31.5	5.15	20.87	7	CALB2	83.6	83.6	87.6	89.4	89.1	105.2	107.4	111	125.7	117.3
P22681	E3 ubiquitin-protein ligase CBL [OS=Homo sapiens]	12	7	12	7	906	99.6	6.54	27.66	7	CBL	69.9	110.8	101.9	130.2	119.8	94.3	100.4	93.5	86.2	93
P22692	Insulin-like growth factor-binding protein 4 [OS=Homo sapiens]	26	5	13	5	258	27.9	7.15	31.33	5	IGFBP4	109.5	101.4	111.9	98.5	134.1	82.5	88.8	81.5	97.5	94.2
P22694	cAMP-dependent protein kinase catalytic subunit beta [OS=Homo sapiens]	18	6	7	1	351	40.6	8.78	10.1	6	PRKACB	66.1	82	101	85.2	106	115.4	111.9	101.1	92.1	139.2
P22695	Cytochrome b-c1 complex subunit 2, mitochondrial [OS=Homo sapiens]	36	14	45	14	453	48.4	8.63	119.81	14	UQCRC2	105.7	101.9	110.6	98.8	93.3	98	99.1	91.8	101.8	99.1
P23025	DNA repair protein complementing XP-A cells [OS=Homo sapiens]	7	1	2	1	273	31.3	6.73	6.63	1	XPA	99.6	91.3	100.1	86	104.5	110.3	105.8	98.7	87.9	115.9
P23193	Transcription elongation factor A protein 1 [OS=Homo sapiens]	61	21	65	18	301	33.9	8.38	131.9	21	TCEA1	101.6	104.8	100.6	100.1	105	97.7	98.6	95.4	98.5	97.8
P23229	Integrin alpha-6 [OS=Homo sapiens]	31	27	68	27	1130	126.5	6.61	176.53	27	ITGA6	114.2	103.6	112.6	97.8	85.5	95.2	94.3	98.1	100	98.7
P23246	Splicing factor, proline- and glutamine-rich [OS=Homo sapiens]	40	31	149	30	707	76.1	9.44	274.94	31	SFPQ	98.4	97.6	99.2	93.7	87.5	104.6	109.4	107.7	98.9	103
P23258	Tubulin gamma-1 chain [OS=Homo sapiens]	39	12	34	12	451	51.1	6.14	84.59	12	TUBG1	96.3	98.2	98.3	99.7	97.6	101.1	98.9	104.3	101	104.6
P23284	Peptidyl-prolyl cis-trans isomerase B [OS=Homo sapiens]	65	18	122	17	216	23.7	9.41	206.89	18	PPIB	103.3	106.5	100.1	99.3	96.9	101.5	94.1	96.3	98.6	103.4
P23368	NAD-dependent malic enzyme, mitochondrial [OS=Homo sapiens]	7	3	5	2	584	65.4	7.61	12.91	3	ME2	107	107.5	92.6	107.9	70.1	104.1	92.9	101.5	118.1	98.4
P23381	Tryptophan--tRNA ligase, cytoplasmic [OS=Homo sapiens]	33	14	66	14	471	53.1	6.23	160.34	14	WARS1	101.9	91.3	95.4	109.7	119.7	99.5	94.9	91.4	95.9	100.3
P23396	40S ribosomal protein S3 [OS=Homo sapiens]	79	23	183	23	243	26.7	9.66	432.06	23	RPS3	100.8	94.7	100	96.6	90	104.8	111.5	105.6	95.4	100.7
P23434	Glycine cleavage system H protein, mitochondrial [OS=Homo sapiens]	6	1	1	1	173	18.9	4.88	1.95	1	GCSH	119	85.4	65.1	120.3	55.4	133.2	105.6	120.5	85	110.6
P23443	Ribosomal protein S6 kinase beta-1 [OS=Homo sapiens]	5	2	4	1	525	59.1	6.65	12.47	2	RPS6KB1	106.8	97.4	111.5	102.4	106.3	92.1	87	85.7	99.3	111.3
P23469	Receptor-type tyrosine-protein phosphatase epsilon [OS=Homo sapiens]	8	5	5	5	700	80.6	7.02	8.17	5	PTPRE	98.9	84.9	85.2	98	110.7	108.3	95.3	103.6	102.6	112.5
P23470	Receptor-type tyrosine-protein phosphatase gamma [OS=Homo sapiens]	2	2	3	2	1445	161.9	6.42	0	2	PTPRG	76.2	99.9	112.6	90.9	86.7	102.4	114.7	101.4	111.2	104
P23497	Nuclear autoantigen Sp-100 [OS=Homo sapiens]	18	13	37	9	879	100.4	8.22	88.74	13	SP100	87	89.3	92.4	98.1	107.3	104.6	104.1	107.9	102.4	106.7
P23511	Nuclear transcription factor Y subunit alpha [OS=Homo sapiens]	5	1	11	1	347	36.9	8.94	37.47	1	NFYA	96.1	100.8	107.3	99	84.1	103.1	105.8	107.1	91.9	104.8
P23526	Adenosylhomocysteinase [OS=Homo sapiens]	38	22	96	20	432	47.7	6.34	175.63	22	AHCY	105.7	103.5	105.5	106.4	104.7	95.6	99.2	96	86.3	97
P23528	Cofilin-1 [OS=Homo sapiens]	73	20	215	17	166	18.5	8.09	435.42	20	CFL1	101.5	95	99.3	99.1	107.3	96	99.7	99.5	102.6	99.9
P23588	Eukaryotic translation initiation factor 4B [OS=Homo sapiens]	46	31	159	31	611	69.1	5.73	292.31	31	EIF4B	99.7	105.3	102.2	102.1	101	99.3	100.5	100.6	97.7	91.7
P23634	Plasma membrane calcium-transporting ATPase 4 [OS=Homo sapiens]	14	10	14	6	1241	137.8	6.6	40.21	10	ATP2B4	111.7	103.3	108.3	98.3	105.6	91.8	84.7	89.1	97.3	109.9
P23743	Diacylglycerol kinase alpha [OS=Homo sapiens]	1	1	1	1	735	82.6	6.73	2.29	1	DGKA	113.2	113.8	110.7	102.8	98.6	97.9	89.1	89.4	91.5	93.1
P23786	Carnitine O-palmitoyltransferase 2, mitochondrial [OS=Homo sapiens]	2	2	2	2	658	73.7	8.18	5.08	2	CPT2	97.1	90.4	95.2	97.3	86.4	111.1	89.3	111.3	106.2	115.7
P23919	Thymidylate kinase [OS=Homo sapiens]	50	12	47	12	212	23.8	8.27	89.65	12	DTYMK	105.8	100.4	100.5	100.1	103.4	97.9	98.9	98.4	99.3	95.2
P23921	Ribonucleoside-diphosphate reductase large subunit [OS=Homo sapiens]	35	21	57	21	792	90	7.15	139.14	21	RRM1	107.5	98.6	103.1	90.9	90.8	103.2	113.8	107.5	86.8	97.8
P24385	G1/S-specific cyclin-D1 [OS=Homo sapiens]	18	3	4	3	295	33.7	5.02	12.8	3	CCND1	115.7	80.8	96.2	101.8	123.8	96.9	93.1	95.6	79.8	116.3
P24386	Rab proteins geranylgeranyltransferase component A 1 [OS=Homo sapiens]	10	5	8	3	653	73.4	4.75	20.5	5	CHM	96	88	81.5	96.9	113.2	109.2	104.9	103.7	103.6	103
P24468	COUP transcription factor 2 [OS=Homo sapiens]	11	4	7	4	414	45.5	8.28	13.37	4	NR2F2	93.8	113	111	84.3	88.6	99.5	109	100.6	105.1	95.1
P24534	Elongation factor 1-beta [OS=Homo sapiens]	74	18	151	15	225	24.7	4.67	356.13	18	EEF1B2	102.1	106.7	101.2	101.2	103.7	99.5	99.6	98.2	95.4	92.4
P24539	ATP synthase F(0) complex subunit B1, mitochondrial [OS=Homo sapiens]	20	5	14	5	256	28.9	9.36	35.47	5	ATP5PB	106.7	100.8	105.1	94.5	89.2	95.8	107.9	96.9	106.2	96.9
P24557	Thromboxane-A synthase [OS=Homo sapiens]	2	1	2	1	533	60.5	7.62	6.87	1	TBXAS1	150.3	106.7	121.6	158.4	90.5	61.8	68.9	66	87.1	88.8
P24666	Low molecular weight phosphotyrosine protein phosphatase [OS=Homo sapiens]	70	9	21	9	158	18	6.74	65.52	9	ACP1	101	93.3	102.6	101.4	109.1	98.2	95.8	92	101.6	105.1
P24752	Acetyl-CoA acetyltransferase, mitochondrial [OS=Homo sapiens]	55	23	117	23	427	45.2	8.85	297.01	23	ACAT1	111.4	109.6	111.3	107.7	99.4	93.2	90.7	91.1	93.3	92.2
P24821	Tenascin [OS=Homo sapiens]	1	2	2	2	2201	240.7	4.89	5.59	2	TNC	62	101.8	86.9	90.7	77.8	126.2	116.8	107.7	113.1	117
P24844	Myosin regulatory light polypeptide 9 [OS=Homo sapiens]	41	6	32	2	172	19.8	4.92	91.49	6	MYL9	100.5	93.4	106.9	116.1	109.9	95.9	92.3	100.6	88.5	96.1
P24928	DNA-directed RNA polymerase II subunit RPB1 [OS=Homo sapiens]	23	32	59	32	1970	217	7.37	139.61	32	POLR2A	99.4	99.8	101.9	93.5	97.3	103.3	107.2	101.6	99.7	96.2
P24941	Cyclin-dependent kinase 2 [OS=Homo sapiens]	23	7	24	5	298	33.9	8.68	39.97	7	CDK2	111.6	99.2	119.4	107.4	90	106.1	94.7	91.9	94.2	85.5
P25054	Adenomatous polyposis coli protein [OS=Homo sapiens]	2	4	4	4	2843	311.5	7.8	7.1	4	APC	103.1	72.7	92.9	102	88.3	90.3	123.7	116.6	119.5	90.8
P25098	Beta-adrenergic receptor kinase 1 [OS=Homo sapiens]	2	2	2	2	689	79.5	7.28	4.8	2	GRK2	83.7	98.6	110.8	97.8	81	106.2	102.5	97	118.2	104.2
P25205	DNA replication licensing factor MCM3 [OS=Homo sapiens]	49	38	93	38	808	90.9	5.77	206.92	38	MCM3	110.9	104.7	107	89.4	92.9	100.6	105.5	100	93.9	95.3
P25325	3-mercaptopyruvate sulfurtransferase [OS=Homo sapiens]	33	7	17	7	297	33.2	6.6	43.49	7	MPST	103.3	101.7	96.6	102.5	92.2	102.9	97.7	99	103.3	100.8
P25398	40S ribosomal protein S12 [OS=Homo sapiens]	58	9	115	9	132	14.5	7.21	236.88	9	RPS12	103	110.4	103.6	93.7	96.2	101.1	99	97.2	97.8	98.1
P25440	Bromodomain-containing protein 2 [OS=Homo sapiens]	18	10	14	10	801	88	9.09	29.44	10	BRD2	98.2	103.3	110.1	100	97.1	94.6	97.8	95.8	101.9	101.2
P25490	Transcriptional repressor protein YY1 [OS=Homo sapiens]	23	13	25	13	414	44.7	6.25	49.55	13	YY1	95.2	101.7	101.8	93.6	85.6	104.9	104.9	106.5	108.6	97.2
P25685	DnaJ homolog subfamily B member 1 [OS=Homo sapiens]	49	18	61	17	340	38	8.63	116.31	18	DNAJB1	97.1	98.4	104.2	102.5	104.3	100.3	98.3	98	99.2	97.6
P25705	ATP synthase subunit alpha, mitochondrial [OS=Homo sapiens]	58	33	272	33	553	59.7	9.13	683.58	33	ATP5F1A	98	98.8	99.2	93.8	87.1	103.8	102.7	102.8	106.6	107.3
P25786	Proteasome subunit alpha type-1 [OS=Homo sapiens]	48	14	35	14	263	29.5	6.61	90.08	14	PSMA1	101.6	98.8	99.7	98.8	110.5	95	97.2	99.6	95.9	102.9
P25787	Proteasome subunit alpha type-2 [OS=Homo sapiens]	20	5	12	5	234	25.9	7.43	23.92	5	PSMA2	107.5	94.7	100	92.7	105.8	94.6	100.6	104.6	99.3	100.1
P25788	Proteasome subunit alpha type-3 [OS=Homo sapiens]	25	8	11	8	255	28.4	5.33	16.15	8	PSMA3	98.1	97.7	92.9	95	108.7	102.3	112.5	104.3	88.9	99.8
P25789	Proteasome subunit alpha type-4 [OS=Homo sapiens]	25	6	17	6	261	29.5	7.72	30.05	6	PSMA4	104.6	90.8	98	100.1	97.5	98.9	101.8	101.8	91	115.4
P26006	Integrin alpha-3 [OS=Homo sapiens]	18	19	85	19	1051	116.5	6.77	175.75	19	ITGA3	103.4	96.4	102	97	91.9	100.6	102.1	98.5	103.3	104.9
P26022	Pentraxin-related protein PTX3 [OS=Homo sapiens]	4	1	1	1	381	41.9	5.01	2.46	1	PTX3	78.3	75.7	132.4	82.2	101.1	103.4	114.7	78	130.9	103.2
P26038	Moesin [OS=Homo sapiens]	80	65	498	52	577	67.8	6.4	997.12	65	MSN	101.6	101.6	99.7	105.9	114.1	92.1	89.8	95	102.3	98
P26196	Probable ATP-dependent RNA helicase DDX6 [OS=Homo sapiens]	34	15	68	14	483	54.4	8.66	144.06	15	DDX6	98.3	99.6	101.3	106.5	104.9	98.8	98.3	100.2	96	96.2
P26232	Catenin alpha-2 [OS=Homo sapiens]	13	12	30	2	953	105.2	5.71	84.67	12	CTNNA2	99.3	95	103.8	106.6	98.5	105.6	91.5	89.3	101.2	109.2
P26358	DNA (cytosine-5)-methyltransferase 1 [OS=Homo sapiens]	43	63	165	63	1616	183.1	7.75	426.77	63	DNMT1	107.8	103.7	102.7	86	84.6	107.7	111	105.5	95.5	95.5
P26368	Splicing factor U2AF 65 kDa subunit [OS=Homo sapiens]	35	12	63	12	475	53.5	9.09	169.43	12	U2AF2	102.7	91.8	100.5	96.3	91.1	98.6	113.5	104.8	99.2	101.5
P26373	60S ribosomal protein L13 [OS=Homo sapiens]	50	16	79	16	211	24.2	11.65	125.25	16	RPL13	104.4	104.5	102	93.2	94.1	103.3	102.2	98.9	97.5	99.8
P26374	Rab proteins geranylgeranyltransferase component A 2 [OS=Homo sapiens]	10	6	8	4	656	74	4.93	13.6	6	CHML	103	115.8	99.1	103	96.7	105	89.6	96.3	97	94.3
P26440	Isovaleryl-CoA dehydrogenase, mitochondrial [OS=Homo sapiens]	12	4	7	4	426	46.6	8.05	15.37	4	IVD	99.2	85.5	102	102.3	71.9	109	105.2	111.7	105.9	107.3
P26447	Protein S100-A4 [OS=Homo sapiens]	46	7	81	7	101	11.7	6.11	154.88	7	S100A4	82	87.8	91.6	92.7	92.3	106.3	104.7	110.6	120.5	111.5
P26572	Alpha-1,3-mannosyl-glycoprotein 2-beta-N-acetylglucosaminyltransferase [OS=Homo sapiens]	5	2	2	2	445	50.8	9.16	2.35	2	MGAT1	118.9	107.8	98.8	88.3	129.7	78.4	81.2	82.1	113.8	101
P26583	High mobility group protein B2 [OS=Homo sapiens]	50	13	79	10	209	24	7.81	134.36	13	HMGB2	83.9	97.6	103.3	93.7	95.8	105.1	107.4	106.1	101.4	105.8
P26599	Polypyrimidine tract-binding protein 1 [OS=Homo sapiens]	46	17	129	14	531	57.2	9.17	440.81	17	PTBP1	97.5	97.8	98.8	95.1	87.8	106.1	107.1	104.6	101.9	103.3
P26639	Threonine--tRNA ligase 1, cytoplasmic [OS=Homo sapiens]	51	40	183	40	723	83.4	6.67	446.36	40	TARS1	102	98.4	101.3	107.2	106.3	97.2	98.2	97.8	95.2	96.6
P26640	Valine--tRNA ligase [OS=Homo sapiens]	32	38	160	37	1264	140.4	7.59	346.75	38	VARS1	99.1	100.8	99.2	100.7	100.4	101.2	102	99.4	99.2	98
P26641	Elongation factor 1-gamma [OS=Homo sapiens]	42	22	238	22	437	50.1	6.67	432.76	22	EEF1G	99.9	106	102.1	100.8	103.7	99.4	98.9	97.9	97.3	94.1
P26885	Peptidyl-prolyl cis-trans isomerase FKBP2 [OS=Homo sapiens]	49	6	30	6	142	15.6	9.13	78.82	6	FKBP2	99.9	99.6	104.7	106.8	111	92.9	89.7	89.2	104.3	101.9
P27105	Stomatin [OS=Homo sapiens]	12	3	5	3	288	31.7	7.88	8.22	3	STOM	141.4	109.4	148.5	115.1	107.8	65.3	64.9	63.8	87.3	96.4
P27144	Adenylate kinase 4, mitochondrial [OS=Homo sapiens]	37	8	20	8	223	25.3	8.4	31.01	8	AK4	94.1	93.2	91.7	93.1	85.7	109.8	104.4	108.7	107.6	111.7
P27348	14-3-3 protein theta [OS=Homo sapiens]	69	20	174	14	245	27.7	4.78	395.31	20	YWHAQ	97.7	95.3	98.3	106.4	108.2	95.6	97.5	101.7	98.7	100.6
P27361	Mitogen-activated protein kinase 3 [OS=Homo sapiens]	14	5	7	3	379	43.1	6.74	7.54	5	MAPK3	92.5	106.6	96.3	101	102.5	102.8	92.6	100.8	106.9	98.1
P27448	MAP/microtubule affinity-regulating kinase 3 [OS=Homo sapiens]	13	7	8	6	753	84.4	9.57	18.43	7	MARK3	72.6	95	104.7	96.1	96	97.3	103.4	106.3	119.2	109.4
P27540	Aryl hydrocarbon receptor nuclear translocator [OS=Homo sapiens]	2	1	1	1	789	86.6	6.54	4.77	1	ARNT	87.8	90.7	91.7	81.6	78.1	117.5	100.7	118.4	124	109.5
P27635	60S ribosomal protein L10 [OS=Homo sapiens]	50	12	147	12	214	24.6	10.08	383.78	12	RPL10	97.6	102.3	100.4	96.8	92.9	104	104.5	104	96.8	100.8
P27694	Replication protein A 70 kDa DNA-binding subunit [OS=Homo sapiens]	50	27	76	27	616	68.1	7.21	205.39	27	RPA1	103.9	101.6	99.9	97.1	94.4	105.7	102.1	105.6	93	96.8
P27695	DNA-(apurinic or apyrimidinic site) endonuclease [OS=Homo sapiens]	48	15	66	15	318	35.5	8.12	167.06	15	APEX1	99.6	100.2	105.9	102	99.2	97.6	101.3	100.8	97.8	95.5
P27707	Deoxycytidine kinase [OS=Homo sapiens]	31	7	19	7	260	30.5	5.21	50.6	7	DCK	102.1	105.1	103.7	98.8	100.9	97.7	101.2	103.2	92	95.2
P27708	CAD protein [OS=Homo sapiens]	28	45	130	44	2225	242.8	6.46	314.28	45	CAD	104.6	104.1	101.8	99.7	102.1	100.9	99.8	97.8	95.6	93.8
P27797	Calreticulin [OS=Homo sapiens]	59	23	181	22	417	48.1	4.44	425.26	23	CALR	111.2	105.2	105.8	98.7	106.8	91.5	89.7	88.8	99.7	102.5
P27816	Microtubule-associated protein 4 [OS=Homo sapiens]	54	63	302	63	1152	120.9	5.43	603.73	63	MAP4	94.2	97.4	95.9	105.1	104.6	98.5	98.8	100.8	102.9	101.9
P27824	Calnexin [OS=Homo sapiens]	36	28	116	28	592	67.5	4.6	243.52	28	CANX	127	108	114.2	92.4	109.8	86.2	88.9	81.5	91.4	100.5
P27986	Phosphatidylinositol 3-kinase regulatory subunit alpha [OS=Homo sapiens]	4	3	3	3	724	83.5	6.16	6.89	3	PIK3R1	98.9	103.2	109.5	114.4	96.4	92.1	112.4	98.5	93.4	81.2
P28062	Proteasome subunit beta type-8 [OS=Homo sapiens]	13	3	6	3	276	30.3	7.43	11.56	3	PSMB8	89	92.5	92.5	83.9	95.4	109.1	104.9	116.6	102.4	113.7
P28065	Proteasome subunit beta type-9 [OS=Homo sapiens]	5	1	2	1	219	23.3	5.03	3.66	1	PSMB9	107.8	78.9	98.2	86.2	64.2	116.7	109.6	126.4	104.1	107.8
P28066	Proteasome subunit alpha type-5 [OS=Homo sapiens]	46	8	29	8	241	26.4	4.79	70.4	8	PSMA5	96.7	97.8	96	105.7	115	98.9	98.5	100.8	91.8	98.7
P28070	Proteasome subunit beta type-4 [OS=Homo sapiens]	20	4	7	4	264	29.2	5.97	20.35	4	PSMB4	108.7	79.2	104.4	101.9	110.1	99.8	92.9	98.7	96.2	108
P28072	Proteasome subunit beta type-6 [OS=Homo sapiens]	32	7	16	7	239	25.3	4.92	20.11	7	PSMB6	109.5	102.7	95.7	98.6	111.3	97.9	90.8	92.3	98.2	103.1
P28074	Proteasome subunit beta type-5 [OS=Homo sapiens]	24	5	5	5	263	28.5	6.92	10.97	5	PSMB5	108.9	98.6	104.5	98.6	120.4	90.7	83.7	89.1	103	102.6
P28161	Glutathione S-transferase Mu 2 [OS=Homo sapiens]	24	5	6	1	218	25.7	6.37	13.83	5	GSTM2	100.7	102.3	95.1	113.8	112.3	89	95.4	99.4	93.1	98.8
P28288	ATP-binding cassette sub-family D member 3 [OS=Homo sapiens]	15	9	14	9	659	75.4	9.36	13.15	9	ABCD3	107.6	94	99.5	97.1	85.6	107.2	103.8	109.4	92.8	103.2
P28290	Protein ITPRID2 [OS=Homo sapiens]	9	10	17	10	1259	138.3	5.19	31.44	10	ITPRID2	97.6	103.8	101.5	94	93.7	100.4	99	106	100.1	103.9
P28331	NADH-ubiquinone oxidoreductase 75 kDa subunit, mitochondrial [OS=Homo sapiens]	19	11	28	11	727	79.4	6.23	72.66	11	NDUFS1	107	100.2	106	91.8	87.4	102.5	101.5	98.1	99.5	106
P28340	DNA polymerase delta catalytic subunit [OS=Homo sapiens]	21	22	40	21	1107	123.6	7.03	73.16	22	POLD1	101.9	105	99	92.8	87.1	107	105.8	108.8	96.6	96.1
P28347	Transcriptional enhancer factor TEF-1 [OS=Homo sapiens]	2	1	1	1	426	47.9	8.15	2.07	1	TEAD1	128.6	95	120.5	88.3	82.6	103	114.2	102.6	84.2	81.1
P28370	Probable global transcription activator SNF2L1 [OS=Homo sapiens]	21	23	51	16	1054	122.5	8.09	87.3	23	SMARCA1	98	95.8	94.8	91.4	81.6	110	109.4	111.2	103.5	104.4
P28482	Mitogen-activated protein kinase 1 [OS=Homo sapiens]	26	10	21	8	360	41.4	6.98	35.23	10	MAPK1	97.5	100.3	102.8	101.4	98	101.6	98.6	101.2	96.2	102.5
P28702	Retinoic acid receptor RXR-beta [OS=Homo sapiens]	11	5	7	4	533	56.9	8.18	4.79	5	RXRB	66.2	94.6	99.9	103.3	113.2	116	93.1	110.1	101.6	102
P28715	DNA excision repair protein ERCC-5 [OS=Homo sapiens]	6	6	10	5	1186	133	5.22	16.64	6	ERCC5	113.6	82.6	70.7	85.1	65.5	124.2	112.7	131.5	86.1	128
P28749	Retinoblastoma-like protein 1 [OS=Homo sapiens]	5	4	7	4	1068	120.8	7.5	15.57	4	RBL1	103.4	119.8	111.7	86.3	59.5	113.3	107	106.9	84.4	107.8
P28799	Progranulin [OS=Homo sapiens]	22	11	23	11	593	63.5	6.83	65.19	11	GRN	92.3	99	97.6	106.5	106	92.7	91.8	94.5	109.6	110.1
P28838	Cytosol aminopeptidase [OS=Homo sapiens]	60	28	134	28	519	56.1	7.93	358.04	28	LAP3	112.7	114.1	114.5	112.4	114.6	86.3	85.3	84.9	89.9	85.3
P29034	Protein S100-A2 [OS=Homo sapiens]	28	6	17	6	98	11.1	4.78	21.06	6	S100A2	84.6	77.8	80.2	84.6	74.9	123.2	130.8	133.2	111.3	99.5
P29083	General transcription factor IIE subunit 1 [OS=Homo sapiens]	24	7	18	7	439	49.4	4.82	46.99	7	GTF2E1	97.1	91.4	106.2	103.2	119.7	95.5	97.4	91.9	105.3	92.3
P29084	Transcription initiation factor IIE subunit beta [OS=Homo sapiens]	26	8	15	8	291	33	9.66	25.61	8	GTF2E2	96.2	98.7	98.9	96	98.3	100.5	100.8	103.5	102.3	104.8
P29144	Tripeptidyl-peptidase 2 [OS=Homo sapiens]	23	23	53	23	1249	138.3	6.32	144.16	23	TPP2	91.6	92.7	94.8	99.4	98.1	102.3	106.4	102.6	106.7	105.5
P29218	Inositol monophosphatase 1 [OS=Homo sapiens]	39	9	17	9	277	30.2	5.26	35.76	9	IMPA1	124.3	99.6	104.1	100	143.9	81.7	87.5	83.9	76	99
P29279	CCN family member 2 [OS=Homo sapiens]	30	9	9	9	349	38.1	8	20.14	9	CCN2	111.7	99.6	94.4	116.5	95.9	98.7	91.4	94.7	97	100
P29317	Ephrin type-A receptor 2 [OS=Homo sapiens]	23	18	49	17	976	108.2	6.23	113.96	18	EPHA2	130.7	115.5	120.6	99.3	106.3	87.5	87.3	80.6	83.5	88.6
P29323	Ephrin type-B receptor 2 [OS=Homo sapiens]	12	8	12	7	1055	117.4	6.55	36.5	8	EPHB2	68.3	100.9	86.5	127.7	116	99	99.9	100.5	94.4	106.8
P29353	SHC-transforming protein 1 [OS=Homo sapiens]	17	7	18	7	583	62.8	6.44	47.25	7	SHC1	90.9	96.4	95.6	105.1	102.1	101.5	98.2	99.2	102.1	108.9
P29372	DNA-3-methyladenine glycosylase [OS=Homo sapiens]	24	6	13	6	298	32.8	9.57	26.41	6	MPG	87.2	93.7	92.7	97.3	86.6	103.3	100.9	104.4	106.2	127.7
P29373	Cellular retinoic acid-binding protein 2 [OS=Homo sapiens]	5	1	1	1	138	15.7	5.4	0	1	CRABP2	138.7	132.3	100.7	86.1	115.8	84.7	96.7	76.8	87.6	80.7
P29401	Transketolase [OS=Homo sapiens]	54	30	211	30	623	67.8	7.66	582.49	30	TKT	87.9	89.6	88.3	103.2	108.2	99.9	99.7	100.6	114.8	107.7
P29558	RNA-binding motif, single-stranded-interacting protein 1 [OS=Homo sapiens]	21	6	20	2	406	44.5	8.79	52.4	6	RBMS1	98	69.2	101.9	101.9	101.5	97.4	98.9	73.3	136.2	121.8
P29590	Protein PML [OS=Homo sapiens]	27	21	38	21	882	97.5	6.21	68.91	21	PML	93.7	96.9	97.8	99	85.8	108.9	99	107.5	107	104.4
P29692	Elongation factor 1-delta [OS=Homo sapiens]	73	20	176	17	281	31.1	5.01	398.48	20	EEF1D	105.2	105.2	102.2	99.9	101.3	99.2	99	97.7	94.4	96
P29966	Myristoylated alanine-rich C-kinase substrate [OS=Homo sapiens]	54	19	69	18	332	31.5	4.45	165.13	19	MARCKS	99.1	88.6	100.1	93.7	89.9	103.4	106.4	108.3	107	103.5
P29992	Guanine nucleotide-binding protein subunit alpha-11 [OS=Homo sapiens]	14	4	7	3	359	42.1	5.69	14.41	4	GNA11	134	126.7	123.2	94	104.4	87.5	81.4	72.8	87	89
P30038	Delta-1-pyrroline-5-carboxylate dehydrogenase, mitochondrial [OS=Homo sapiens]	9	5	5	5	563	61.7	8.07	5.87	5	ALDH4A1	104.1	115.4	112.1	109.5	103.3	92	92.8	89.7	93.3	87.9
P30040	Endoplasmic reticulum resident protein 29 [OS=Homo sapiens]	62	16	98	16	261	29	7.31	241.85	16	ERP29	107	109	103.1	101.2	103.7	96	91	90.8	99.4	98.8
P30041	Peroxiredoxin-6 [OS=Homo sapiens]	49	16	62	16	224	25	6.38	134.37	16	PRDX6	95.3	91.3	94.2	96.2	99.3	100.8	106.5	103.2	108.8	104.4
P30043	Flavin reductase (NADPH) [OS=Homo sapiens]	35	5	13	5	206	22.1	7.65	36.12	5	BLVRB	89	87.5	86.7	129	120.6	90.8	89.8	93.9	105.1	107.7
P30044	Peroxiredoxin-5, mitochondrial [OS=Homo sapiens]	57	12	77	12	214	22.1	8.7	215.77	12	PRDX5	102.4	97.1	102.4	119.4	118.1	88.3	88.3	87.8	99	97.2
P30046	D-dopachrome decarboxylase [OS=Homo sapiens]	23	3	15	3	118	12.7	7.3	24.73	3	DDT	105.6	106.1	100.5	105.8	110.9	89.1	91.1	90.7	103.9	96.3
P30048	Thioredoxin-dependent peroxide reductase, mitochondrial [OS=Homo sapiens]	31	7	39	7	256	27.7	7.78	98.84	7	PRDX3	108.1	95.6	101	95.7	92.6	98.4	101.6	96	104.6	106.4
P30049	ATP synthase subunit delta, mitochondrial [OS=Homo sapiens]	17	3	22	3	168	17.5	5.49	48.86	3	ATP5F1D	96.6	102.2	106.1	91.2	88.3	100.7	107.2	97.1	111.8	98.8
P30050	60S ribosomal protein L12 [OS=Homo sapiens]	68	13	122	13	165	17.8	9.42	351.49	13	RPL12	96.2	103.3	100	96.9	93.1	105.1	105.1	101.9	99.4	99.1
P30084	Enoyl-CoA hydratase, mitochondrial [OS=Homo sapiens]	48	12	42	12	290	31.4	8.07	74.93	12	ECHS1	106.9	94.2	97.4	95	86.6	103.3	103.8	102.6	106.6	103.5
P30085	UMP-CMP kinase [OS=Homo sapiens]	31	7	38	7	196	22.2	5.57	69.45	7	CMPK1	96.8	97	91.4	99.2	101.6	101.6	98.2	105.4	102.3	106.4
P30086	Phosphatidylethanolamine-binding protein 1 [OS=Homo sapiens]	71	10	71	10	187	21	7.53	207.9	10	PEBP1	93.3	93.1	94	101.6	101.2	100.5	101.1	99.9	106.8	108.6
P30101	Protein disulfide-isomerase A3 [OS=Homo sapiens]	58	34	224	34	505	56.7	6.35	508.01	34	PDIA3	103.3	103.3	101.1	101.5	106.5	95.1	91.8	90.7	102.6	104.1
P30153	Serine/threonine-protein phosphatase 2A 65 kDa regulatory subunit A alpha isoform [OS=Homo sapiens]	48	27	137	21	589	65.3	5.11	321.73	27	PPP2R1A	101	95.7	99.8	103.1	106.1	95.7	99.5	99.2	101.2	98.7
P30154	Serine/threonine-protein phosphatase 2A 65 kDa regulatory subunit A beta isoform [OS=Homo sapiens]	29	15	40	9	601	66.2	4.94	96.66	15	PPP2R1B	110	93.4	102.9	98.9	114.1	90.8	97.1	89.9	98.7	104.2
P30260	Cell division cycle protein 27 homolog [OS=Homo sapiens]	23	14	22	14	824	91.8	7.02	47.21	14	CDC27	104.2	100.6	105.9	98.9	94.2	103.3	104.2	101.5	95.2	91.9
P30307	M-phase inducer phosphatase 3 [OS=Homo sapiens]	12	4	4	4	473	53.3	6.79	8.18	4	CDC25C	85.3	93.6	117.8	90.8	90.3	102.6	108.8	102.7	103.1	105
P30405	Peptidyl-prolyl cis-trans isomerase F, mitochondrial [OS=Homo sapiens]	54	10	35	7	207	22	9.38	59.72	10	PPIF	95.3	93.2	93.4	89.8	92.6	107.8	111.7	101.3	108.6	106.5
P30414	NK-tumor recognition protein [OS=Homo sapiens]	4	5	7	5	1462	165.6	9.99	13.28	5	NKTR	84.9	123.6	100.2	101.3	98.5	106.6	102.4	111.2	82.8	88.4
P30419	Glycylpeptide N-tetradecanoyltransferase 1 [OS=Homo sapiens]	20	11	27	11	496	56.8	7.8	49.3	11	NMT1	95.5	95.3	95.7	101.7	104.8	100	103.2	101.6	100	102.2
P30519	Heme oxygenase 2 [OS=Homo sapiens]	36	11	21	11	316	36	5.41	50.68	11	HMOX2	117	99.9	113.1	97.2	94.2	95.2	103.1	99	88.9	92.4
P30520	Adenylosuccinate synthetase isozyme 2 [OS=Homo sapiens]	38	15	60	15	456	50.1	6.55	153.14	15	ADSS2	99.6	100.2	97.8	96.4	100.6	101.2	100.1	101.2	97.9	105
P30530	Tyrosine-protein kinase receptor UFO [OS=Homo sapiens]	18	11	19	11	894	98.3	5.39	49.88	11	AXL	111.1	112.9	108.7	85.7	91.3	102.2	100.5	100.6	95.2	91.8
P30533	Alpha-2-macroglobulin receptor-associated protein [OS=Homo sapiens]	27	9	23	9	357	41.4	8.78	42.71	9	LRPAP1	110.1	108.6	110.5	105.8	111.3	91.9	87.7	89.2	89.3	95.5
P30566	Adenylosuccinate lyase [OS=Homo sapiens]	28	14	42	14	484	54.9	7.11	106.31	14	ADSL	108.3	98.7	100.5	102.2	101.9	98.3	101.7	98.4	95.7	94.3
P30622	CAP-Gly domain-containing linker protein 1 [OS=Homo sapiens]	32	46	88	41	1438	162.1	5.36	166.03	46	CLIP1	98.6	101.1	100.3	107.8	113.6	95.6	95.8	93.3	96	98
P30626	Sorcin [OS=Homo sapiens]	47	7	24	7	198	21.7	5.59	47.24	7	SRI	93.3	88.2	93.1	95.9	99.6	102.2	102.8	106.1	114.8	104
P30679	Guanine nucleotide-binding protein subunit alpha-15 [OS=Homo sapiens]	4	2	4	2	374	43.5	8.51	1.99	2		117.2	103.2	125.6	95.8	121.1	92	100.9	92.6	79.6	71.8
P30740	Leukocyte elastase inhibitor [OS=Homo sapiens]	40	14	43	13	379	42.7	6.28	106.28	14	SERPINB1	100	90.2	92.8	104.7	104.5	96.1	97.2	100.7	105.3	108.4
P30825	High affinity cationic amino acid transporter 1 [OS=Homo sapiens]	3	2	4	2	629	67.6	5.43	6.78	2	SLC7A1	104.3	102.5	98.8	96.7	90.3	97.7	106.4	110	96.3	97
P30837	Aldehyde dehydrogenase X, mitochondrial [OS=Homo sapiens]	23	9	13	9	517	57.2	6.99	27.22	9	ALDH1B1	102.9	101.3	101.8	107.6	92.8	95.1	105.1	97.3	96.1	100
P30838	Aldehyde dehydrogenase, dimeric NADP-preferring [OS=Homo sapiens]	7	3	6	3	453	50.4	6.54	9.98	3	ALDH3A1	93.9	98.3	108.7	111.6	112.2	97.2	95.1	85.9	94.2	102.8
P30876	DNA-directed RNA polymerase II subunit RPB2 [OS=Homo sapiens]	22	22	48	22	1174	133.8	6.87	123.14	22	POLR2B	92.7	95.5	97.5	92.3	92.1	105.7	99.3	104.8	111.2	109
P31040	Succinate dehydrogenase [ubiquinone] flavoprotein subunit, mitochondrial [OS=Homo sapiens]	22	12	55	12	664	72.6	7.39	146.59	12	SDHA	99.6	103.1	101.1	91.3	92	101.8	99.9	99.6	104.8	106.8
P31146	Coronin-1A [OS=Homo sapiens]	3	1	1	1	461	51	6.68	2.73	1	CORO1A	76.4	122.1	151.5	104.6	90.8	75.6	105.6	75.3	106.3	91.8
P31150	Rab GDP dissociation inhibitor alpha [OS=Homo sapiens]	60	27	105	17	447	50.6	5.14	285.6	27	GDI1	98.3	97.8	99.7	107.9	108.2	95.4	94.5	98.3	98.9	100.9
P31153	S-adenosylmethionine synthase isoform type-2 [OS=Homo sapiens]	59	19	76	19	395	43.6	6.48	177.24	19	MAT2A	98.1	100.7	99.3	104.9	104	98.6	98.5	99.7	99	97.1
P31321	cAMP-dependent protein kinase type I-beta regulatory subunit [OS=Homo sapiens]	11	3	5	2	381	43	5.71	7.04	3	PRKAR1B	111.7	83.9	114	90.7	68	94	94.4	115.9	130.1	97.2
P31350	Ribonucleoside-diphosphate reductase subunit M2 [OS=Homo sapiens]	32	10	17	10	389	44.8	5.38	30.6	10	RRM2	107.1	118.5	107.5	86.3	83	111.2	110	112.1	82.9	81.5
P31431	Syndecan-4 [OS=Homo sapiens]	25	6	9	6	198	21.6	4.5	17.95	6	SDC4	94.3	98.7	97.2	108.5	105.4	97.2	94.5	96.2	103.2	105
P31483	Cytotoxic granule associated RNA binding protein TIA1 [OS=Homo sapiens]	15	6	15	2	386	42.9	7.74	31.11	6	TIA1	116.5	151.1	86.4	120.2	99.8	77.3	60.5	79.6	136.7	71.8
P31689	DnaJ homolog subfamily A member 1 [OS=Homo sapiens]	55	20	77	19	397	44.8	7.08	173.31	20	DNAJA1	99.9	100.1	103	94.7	94.5	102	108.6	102.9	95.7	98.6
P31749	RAC-alpha serine/threonine-protein kinase [OS=Homo sapiens]	13	5	9	3	480	55.7	6.07	21.14	5	AKT1	97.2	79.6	102.5	97.5	100.1	102	109.1	107.8	102.6	101.5
P31751	RAC-beta serine/threonine-protein kinase [OS=Homo sapiens]	16	6	8	4	481	55.7	6.37	17.14	6	AKT2	112.2	110	97.8	101.8	93.5	90.4	100	107.9	84.7	101.8
P31930	Cytochrome b-c1 complex subunit 1, mitochondrial [OS=Homo sapiens]	41	14	57	14	480	52.6	6.37	181.39	14	UQCRC1	103.7	104.3	104.5	96.8	92.7	100.5	95.3	96.9	100.6	104.8
P31937	3-hydroxyisobutyrate dehydrogenase, mitochondrial [OS=Homo sapiens]	35	7	19	7	336	35.3	8.13	65.05	7	HIBADH	103.8	92.1	95.9	94.4	91.8	99.5	105.8	103.5	111.8	101.3
P31939	Bifunctional purine biosynthesis protein ATIC [OS=Homo sapiens]	65	32	154	32	592	64.6	6.71	426.33	32	ATIC	100.8	98.5	96.5	103.5	104.9	99.6	99.6	99.9	98.5	98.3
P31942	Heterogeneous nuclear ribonucleoprotein H3 [OS=Homo sapiens]	61	15	76	13	346	36.9	6.87	202.75	15	HNRNPH3	99.6	97.1	102.2	91.4	80.1	109.6	105.6	109.6	103.4	101.4
P31943	Heterogeneous nuclear ribonucleoprotein H [OS=Homo sapiens]	51	18	157	11	449	49.2	6.3	519.58	18	HNRNPH1	98.5	94.2	100.5	92.4	88.2	105.2	107	104.8	105.5	103.8
P31946	14-3-3 protein beta/alpha [OS=Homo sapiens]	63	18	179	10	246	28.1	4.83	404.44	18	YWHAB	101.4	96.4	100	104.6	109.7	95	101.7	97.4	96.6	97.2
P31947	14-3-3 protein sigma [OS=Homo sapiens]	65	20	159	16	248	27.8	4.74	294.23	20	SFN	92.8	96.1	92.6	99.5	106.9	98.3	95.9	98.6	111.3	108
P31948	Stress-induced-phosphoprotein 1 [OS=Homo sapiens]	71	50	279	50	543	62.6	6.8	550.08	50	STIP1	96.6	99.9	99.8	104.8	105.7	101.1	99.7	100.8	96.1	95.5
P31949	Protein S100-A11 [OS=Homo sapiens]	56	6	92	6	105	11.7	7.12	190.33	6	S100A11	87.3	111.5	101.2	103.7	109.7	93.8	86.9	93.9	108.8	103.3
P32004	Neural cell adhesion molecule L1 [OS=Homo sapiens]	11	11	22	11	1257	139.9	6.24	54.14	11	L1CAM	80.5	83.9	84.6	95.2	91.2	109.7	104.9	107.7	119.4	122.8
P32119	Peroxiredoxin-2 [OS=Homo sapiens]	42	14	90	13	198	21.9	5.97	186.04	14	PRDX2	108.6	101.9	103.7	107.5	112.6	89.7	91.6	91.5	96.8	96
P32320	Cytidine deaminase [OS=Homo sapiens]	25	2	2	2	146	16.2	6.92	7.25	2	CDA	105.5	125.6	128.4	121.4	128.2	76.3	70	72.1	92.7	79.8
P32321	Deoxycytidylate deaminase [OS=Homo sapiens]	44	5	13	5	178	20	7.56	37.48	5	DCTD	99.3	93.5	93.7	99.1	95	104.8	100.8	103	107.6	103.3
P32322	Pyrroline-5-carboxylate reductase 1, mitochondrial [OS=Homo sapiens]	31	7	21	6	319	33.3	7.61	56.45	7	PYCR1	103.4	102.6	100.7	95.8	88.4	103	102.6	102.8	103.6	97
P32455	Guanylate-binding protein 1 [OS=Homo sapiens]	27	16	44	15	592	67.9	6.32	80.17	16	GBP1	92.4	92.5	91.4	102.4	105.3	98.2	99.6	105	102.8	110.4
P32456	Guanylate-binding protein 2 [OS=Homo sapiens]	14	9	21	8	591	67.2	5.71	37.6	9	GBP2	95.5	94.9	97.4	119.5	114.2	97.1	85.9	96	101.2	98.1
P32519	ETS-related transcription factor Elf-1 [OS=Homo sapiens]	7	3	4	3	619	67.5	5.21	11.77	3	ELF1	100.8	94.4	104.8	95.4	99.1	97.7	95.6	101.8	103.2	107.3
P32780	General transcription factor IIH subunit 1 [OS=Homo sapiens]	11	4	4	4	548	62	8.66	7.74	4	GTF2H1	94.6	123.9	79.4	111.7	127.2	98.3	110.3	93.4	51.7	109.5
P32856	Syntaxin-2 [OS=Homo sapiens]	6	2	2	2	288	33.3	6.28	3.95	2	STX2	109.3	108.2	107.5	105.3	98.2	94	96.2	85.5	89.9	105.9
P32929	Cystathionine gamma-lyase [OS=Homo sapiens]	27	8	19	8	405	44.5	6.7	44.73	8	CTH	83.9	97.5	92.4	119.4	127.3	89.8	87.6	94.5	101.5	106
P32969	60S ribosomal protein L9 [OS=Homo sapiens]	71	13	81	13	192	21.9	9.95	188.56	13	RPL9; RPL9P7; RPL9P8; RPL9P9	99	100.4	101.4	96.1	93.1	106.2	106.1	104.3	95.7	97.6
P33121	Long-chain-fatty-acid--CoA ligase 1 [OS=Homo sapiens]	16	8	13	6	698	77.9	7.15	28.42	8	ACSL1	97.7	100.2	99.3	102.9	116.8	85.3	94.3	92.9	111.5	99.2
P33176	Kinesin-1 heavy chain [OS=Homo sapiens]	57	57	261	45	963	109.6	6.51	604.12	57	KIF5B	99.6	99.6	100.4	100.8	106.8	98.8	98.4	97.1	101	97.5
P33240	Cleavage stimulation factor subunit 2 [OS=Homo sapiens]	30	13	40	5	577	60.9	6.83	93.11	13	CSTF2	94.1	103.8	97.8	100.5	93.4	102.4	102.2	103.9	103.7	98.2
P33316	Deoxyuridine 5'-triphosphate nucleotidohydrolase, mitochondrial [OS=Homo sapiens]	47	11	65	11	252	26.5	9.36	156.8	11	DUT	104.7	107.1	104.9	90.1	95.9	100.8	100.7	99.2	98.4	98.2
P33552	Cyclin-dependent kinases regulatory subunit 2 [OS=Homo sapiens]	20	2	4	1	79	9.9	8.46	8.34	2	CKS2	146.7	107.6	116.4	90.8	98.7	83.5	101.9	98.8	66.1	89.6
P33764	Protein S100-A3 [OS=Homo sapiens]	10	1	2	1	101	11.7	4.78	4.57	1	S100A3	110.1	97.2	100	103.6	81.4	91.4	115.1	88	97.6	115.6
P33897	ATP-binding cassette sub-family D member 1 [OS=Homo sapiens]	7	3	3	2	745	82.9	8.95	5.31	3	ABCD1	75	112.4	94.2	89.5	84.9	74.2	105.5	102.4	116.8	145.1
P33947	ER lumen protein-retaining receptor 2 [OS=Homo sapiens]	4	1	1	1	212	24.4	8.72	1.69	1	KDELR2	107.6	80.1	106.5	100.6	98.2	92.2	104	82	98	130.8
P33981	Dual specificity protein kinase TTK [OS=Homo sapiens]	12	7	9	7	857	97	8.16	21.86	7	TTK	100.7	110.3	117	92.2	87.9	104.8	117.7	110.7	81.5	77.4
P33991	DNA replication licensing factor MCM4 [OS=Homo sapiens]	33	21	47	21	863	96.5	6.74	123.81	21	MCM4	107.7	105.5	107.6	91.1	87.2	106	108.2	103.4	89.6	93.8
P33992	DNA replication licensing factor MCM5 [OS=Homo sapiens]	30	19	57	19	734	82.2	8.37	123.78	19	MCM5	103.3	107.8	104.8	90.4	88.4	105	107.1	103.7	93.9	95.6
P33993	DNA replication licensing factor MCM7 [OS=Homo sapiens]	32	18	41	18	719	81.3	6.46	99.1	18	MCM7	104.2	105.7	102.4	93.7	90.1	106.1	106.8	97.3	97.9	95.8
P34741	Syndecan-2 [OS=Homo sapiens]	17	3	4	3	201	22.1	4.86	6.17	3	SDC2	121	108.6	114.3	99.1	89.5	98.8	89.4	100.2	92	87.3
P34896	Serine hydroxymethyltransferase, cytosolic [OS=Homo sapiens]	27	9	28	7	483	53	7.71	71.95	9	SHMT1	97.2	98.1	97.1	105.8	109	100.3	101	98.3	97.8	95.3
P34897	Serine hydroxymethyltransferase, mitochondrial [OS=Homo sapiens]	55	30	137	28	504	56	8.53	351.95	30	SHMT2	99.3	97.6	101.4	97.1	87.3	105.1	104.5	100.7	105.4	101.6
P34931	Heat shock 70 kDa protein 1-like [OS=Homo sapiens]	31	22	224	1	641	70.3	6.02	568.6	22	HSPA1L	100.4	103.5	101	95.8	110.1	99	101.6	94.8	101.3	92.5
P34932	Heat shock 70 kDa protein 4 [OS=Homo sapiens]	71	61	337	57	840	94.3	5.19	767.1	61	HSPA4	98.4	98.8	97.8	108.2	110	97.8	98.5	98.2	96.9	95.4
P34949	Mannose-6-phosphate isomerase [OS=Homo sapiens]	21	7	17	7	423	46.6	5.95	45.53	7	MPI	94.7	100.1	94.4	112.7	107.6	96.5	89.1	97.1	96.5	111.3
P35052	Glypican-1 [OS=Homo sapiens]	9	4	4	4	558	61.6	7.3	4.83	4	GPC1	80.2	96.3	97	121	117.7	89.7	96.3	85.9	108.1	107.7
P35221	Catenin alpha-1 [OS=Homo sapiens]	47	38	94	28	906	100	6.29	238.14	38	CTNNA1	101	96.8	101	100.7	103.4	98.9	98	96.1	103.4	100.8
P35222	Catenin beta-1 [OS=Homo sapiens]	9	5	12	5	781	85.4	5.86	29.23	5	CTNNB1	113.6	104.8	105.1	90.7	116.5	95	90.2	90.3	101.4	92.3
P35226	Polycomb complex protein BMI-1 [OS=Homo sapiens]	11	4	7	4	326	36.9	8.63	3.73	4	BMI1	105.7	102.6	109.1	100.9	93.3	101.7	99.2	99.4	100.2	87.9
P35232	Prohibitin 1 [OS=Homo sapiens]	59	21	120	21	272	29.8	5.76	297.06	21	PHB1	108.1	101.7	106	94.5	92.7	93.8	100.3	97.7	101.4	103.8
P35237	Serpin B6 [OS=Homo sapiens]	56	16	61	15	376	42.6	5.27	149.78	16	SERPINB6	97.8	90	98.2	101.1	106.8	97.8	101.4	100.1	103.7	103.2
P35241	Radixin [OS=Homo sapiens]	46	34	205	17	583	68.5	6.37	392.03	34	RDX	116.5	117.7	114.9	108.6	121.2	82.6	82	85.8	87.8	82.8
P35244	Replication protein A 14 kDa subunit [OS=Homo sapiens]	61	5	26	5	121	13.6	5.08	62.71	5	RPA3	102.5	101.2	101	97.1	100.2	100.5	103	101.3	96.9	96.3
P35249	Replication factor C subunit 4 [OS=Homo sapiens]	57	19	60	19	363	39.7	8.02	127.69	19	RFC4	105.7	104.3	103.5	98.8	92.9	104.5	103.7	100	92.8	93.9
P35250	Replication factor C subunit 2 [OS=Homo sapiens]	28	8	20	8	354	39.1	6.44	56.53	8	RFC2	106.8	101.9	107.1	93.8	93.4	103.4	99.9	102	95.1	96.6
P35251	Replication factor C subunit 1 [OS=Homo sapiens]	23	23	46	22	1148	128.2	9.36	111.37	23	RFC1	103.7	107.2	105.6	96.7	91.3	99.4	103.4	100.9	97.9	93.9
P35268	60S ribosomal protein L22 [OS=Homo sapiens]	69	9	25	8	128	14.8	9.19	37.81	9	RPL22	106.7	99.3	106	99.4	100.9	98.2	99.1	98	93.7	98.9
P35269	General transcription factor IIF subunit 1 [OS=Homo sapiens]	39	20	53	20	517	58.2	7.49	117.55	20	GTF2F1	91.9	103	99.5	100.4	99.9	102.6	104.4	104.7	103.5	90.2
P35270	Sepiapterin reductase [OS=Homo sapiens]	41	10	28	10	261	28	8.05	63.84	10	SPR	96.3	101.3	100	104.3	104.8	93.5	99.3	99.7	104.6	96.2
P35367	Histamine H1 receptor [OS=Homo sapiens]	3	1	1	1	487	55.7	9.22	2.04	1	HRH1	104.9	121.5	89.2	83.8	90.7	88.5	92.9	107.5	85.6	135.4
P35555	Fibrillin-1 [OS=Homo sapiens]	1	1	1	1	2871	312.1	4.93	2.53	1	FBN1	102	98.9	102.7	97.3	119.4	73	114.1	82.7	87	122.9
P35568	Insulin receptor substrate 1 [OS=Homo sapiens]	19	16	27	16	1242	131.5	8.54	92.11	16	IRS1	93.8	102.3	101.6	112.6	112.4	92.6	92.4	94.4	99.7	98.1
P35573	Glycogen debranching enzyme [OS=Homo sapiens]	8	9	10	9	1532	174.7	6.76	21.59	9	AGL	93.3	89.3	94.8	108.2	100	103.7	99.9	99.1	109.2	102.4
P35579	Myosin-9 [OS=Homo sapiens]	69	193	1879	156	1960	226.4	5.6	4754.48	193	MYH9	96	96.8	94.9	103.1	106.8	99	99.3	99.3	101.9	103
P35580	Myosin-10 [OS=Homo sapiens]	33	62	258	36	1976	228.9	5.54	518.18	62	MYH10	97.1	95.4	98	97.6	97.9	102.4	102	103	106.2	100.4
P35606	Coatomer subunit beta' [OS=Homo sapiens]	37	32	102	32	906	102.4	5.27	226.65	32	COPB2	93.9	95.7	97.1	107.6	105.5	99	98.1	100.9	100.5	101.7
P35610	Sterol O-acyltransferase 1 [OS=Homo sapiens]	15	7	26	7	550	64.7	8.94	57.32	7	SOAT1	105.9	105.4	103.5	101.2	96.3	103.6	103.1	95.5	88.7	96.9
P35611	Alpha-adducin [OS=Homo sapiens]	27	16	30	16	737	80.9	5.83	69.37	16	ADD1	102.5	102.2	106	109.6	105.3	93.5	91.5	92.4	99.1	97.9
P35613	Basigin [OS=Homo sapiens]	31	10	56	10	385	42.2	5.66	138.06	10	BSG	93.7	99.9	100.5	99.4	88.8	103.7	100.1	103.5	102.1	108.3
P35625	Metalloproteinase inhibitor 3 [OS=Homo sapiens]	26	4	9	4	211	24.1	8.72	18.05	4	TIMP3	94	83.6	89.4	93.4	80.8	110.6	100.4	114.8	116.6	116.5
P35637	RNA-binding protein FUS [OS=Homo sapiens]	26	16	92	14	526	53.4	9.36	195.34	16	FUS	91.5	99.7	99	95	90.3	107.4	104.7	104.7	105.1	102.7
P35658	Nuclear pore complex protein Nup214 [OS=Homo sapiens]	18	29	70	29	2090	213.5	7.47	178.77	29	NUP214	94.2	102	98.3	96.9	96.9	104.3	101.4	102.3	102.1	101.6
P35659	Protein DEK [OS=Homo sapiens]	43	21	98	21	375	42.6	8.56	189.91	21	DEK	100.4	98.7	102.4	91.7	86.5	104.1	108.9	105.7	103.3	98.5
P35712	Transcription factor SOX-6 [OS=Homo sapiens]	3	3	4	1	828	91.9	7.78	3.46	3	SOX6	117.7	108.3	97.2	109.1	93.6	96.6	96.8	101	91.3	88.4
P35749	Myosin-11 [OS=Homo sapiens]	10	26	222	2	1972	227.2	5.5	527.21	26	MYH11	92.4	90.9	106.9	107.2	101.2	102.9	99.4	93.7	107.2	98.3
P35754	Glutaredoxin-1 [OS=Homo sapiens]	48	5	23	5	106	11.8	8.09	61.13	5	GLRX	84.9	86.9	93.2	126.4	125.1	92.6	90	94.3	104	102.6
P35790	Choline kinase alpha [OS=Homo sapiens]	13	4	6	4	457	52.2	6.55	21.52	4	CHKA	90	103.1	95.2	98.6	111.1	98	101.2	103.1	95.1	104.5
P35813	Protein phosphatase 1A [OS=Homo sapiens]	34	10	17	9	382	42.4	5.36	31.12	10	PPM1A	102.4	104.3	97.5	105.8	109	93.3	91.2	93.3	103.4	100
P35869	Aryl hydrocarbon receptor [OS=Homo sapiens]	10	7	10	7	848	96.1	6.38	18.44	7	AHR	82.4	98.3	93.3	91.7	88.3	108	102.1	115.6	108.3	112
P35914	Hydroxymethylglutaryl-CoA lyase, mitochondrial [OS=Homo sapiens]	5	2	2	2	325	34.3	8.54	2.03	2	HMGCL	110.7	104.7	94	105.6	87.5	94.6	114.6	88.8	121.3	78.2
P35998	26S proteasome regulatory subunit 7 [OS=Homo sapiens]	74	33	194	33	433	48.6	5.95	454.56	33	PSMC2	94.1	92.2	92	102.5	105.5	103.8	101.6	101.4	102.5	104.5
P36268	Inactive glutathione hydrolase 2 [OS=Homo sapiens]	4	2	2	2	569	61.7	7.58	4.19	2	GGT2P	120.7	87.5	106.8	124.7	96.1	76.2	76.8	106.7	112.8	91.8
P36404	ADP-ribosylation factor-like protein 2 [OS=Homo sapiens]	36	5	13	5	184	20.9	6.34	38.68	5	ARL2	93.8	90.6	87	117.7	97.1	121.2	99	103.8	85.8	104
P36405	ADP-ribosylation factor-like protein 3 [OS=Homo sapiens]	55	8	36	8	182	20.4	7.24	105.82	8	ARL3	103.7	94	99.9	102.1	104.8	95.3	99.8	97.9	101.8	100.9
P36507	Dual specificity mitogen-activated protein kinase kinase 2 [OS=Homo sapiens]	30	11	39	8	400	44.4	6.55	63.25	11	MAP2K2	96.3	99.8	99.5	109.3	104.9	98.7	93.5	98.1	101.1	98.8
P36542	ATP synthase subunit gamma, mitochondrial [OS=Homo sapiens]	21	6	21	6	298	33	9.22	41.58	6	ATP5F1C	94.5	107.5	97.6	96.3	85.2	108.5	102	103.9	105.2	99.3
P36543	V-type proton ATPase subunit E 1 [OS=Homo sapiens]	36	7	19	7	226	26.1	8	46	7	ATP6V1E1	102.4	104	95.4	108.8	107.6	91.4	98.2	98.1	97.9	96.1
P36551	Oxygen-dependent coproporphyrinogen-III oxidase, mitochondrial [OS=Homo sapiens]	49	18	52	18	454	50.1	8.25	98.82	18	CPOX	97.6	96.7	97.5	95.9	93.7	103.1	102	104.1	104.6	104.7
P36578	60S ribosomal protein L4 [OS=Homo sapiens]	55	28	232	28	427	47.7	11.06	484.39	28	RPL4	103.2	101.9	103.1	99	93.2	103.4	105.2	101.7	94.5	94.8
P36639	Oxidized purine nucleoside triphosphate hydrolase [OS=Homo sapiens]	46	7	12	7	156	17.9	5.08	31.45	7	NUDT1	89.9	100.1	97.7	100.1	96	103.3	103.1	98.7	109.8	101.3
P36776	Lon protease homolog, mitochondrial [OS=Homo sapiens]	34	26	83	26	959	106.4	6.39	182.67	26	LONP1	104.1	98.5	101.6	102.2	97.1	99.4	98.9	96.9	99.5	101.8
P36871	Phosphoglucomutase-1 [OS=Homo sapiens]	49	28	88	28	562	61.4	6.76	185.97	28	PGM1	95.4	85.5	94.1	99.7	95.7	101.2	107.5	107.1	107.9	105.8
P36873	Serine/threonine-protein phosphatase PP1-gamma catalytic subunit [OS=Homo sapiens]	31	8	66	1	323	37	6.54	173.91	8	PPP1CC	126.2	114.4	110.5	96.6	89.9	101.8	98.8	87.8	91.7	82.4
P36894	Bone morphogenetic protein receptor type-1A [OS=Homo sapiens]	1	1	1	1	532	60.2	7.58	1.67	1	BMPR1A	137.5	97.3	97.5	96.3	108.1	85.2	86.5	86.8	101.7	103.2
P36915	Guanine nucleotide-binding protein-like 1 [OS=Homo sapiens]	22	10	18	10	607	68.6	5.8	48.56	10	GNL1	94.6	93.4	100.3	109.6	112.6	98.2	92.3	92.2	99.2	107.6
P36954	DNA-directed RNA polymerase II subunit RPB9 [OS=Homo sapiens]	49	5	13	5	125	14.5	5.14	30.43	5	POLR2I	99.8	104.2	110.5	88.9	101.2	98.3	106.1	102.6	98.8	89.6
P36957	Dihydrolipoyllysine-residue succinyltransferase component of 2-oxoglutarate dehydrogenase complex, mitochondrial [OS=Homo sapiens]	11	5	14	5	453	48.7	8.95	28.66	5	DLST	107.7	100.9	108.2	100.3	90.1	99.9	103.2	96	98.2	95.4
P36959	GMP reductase 1 [OS=Homo sapiens]	22	7	16	5	345	37.4	7.06	30.86	7	GMPR	98.2	108.1	106.8	102.8	109.4	95	100.9	94.2	102.8	81.8
P36969	Phospholipid hydroperoxide glutathione peroxidase [OS=Homo sapiens]	17	3	5	3	197	22.2	8.37	13.14	3	GPX4	123	110	112.4	73.1	70.8	116.7	127.3	121.4	68.7	76.8
P37108	Signal recognition particle 14 kDa protein [OS=Homo sapiens]	52	7	39	7	136	14.6	10.04	82.24	7	SRP14	98.2	95.2	100.7	97.7	96.7	101.1	103.5	104.7	105.9	96.3
P37173	TGF-beta receptor type-2 [OS=Homo sapiens]	3	1	1	1	567	64.5	5.9	2.61	1	TGFBR2	126.6	87.5	85.3	131.1	118.8	88.2	79.5	88.2	98.7	96.2
P37198	Nuclear pore glycoprotein p62 [OS=Homo sapiens]	13	6	11	6	522	53.2	5.31	21.94	6	NUP62	96.9	91.5	101.1	97.9	107.5	100.2	103.8	103.3	100.1	97.7
P37235	Hippocalcin-like protein 1 [OS=Homo sapiens]	44	9	34	5	193	22.3	5.35	63.7	9	HPCAL1	92.2	95	94.6	81.4	84.4	105.2	112.5	104.9	114.8	115
P37268	Squalene synthase [OS=Homo sapiens]	5	2	2	2	417	48.1	6.54	4.64	2	FDFT1	118.1	81.2	85.7	101.2	80.8	96.2	117.5	100	111.6	107.7
P37275	Zinc finger E-box-binding homeobox 1 [OS=Homo sapiens]	13	10	14	10	1124	124	4.94	34.96	10	ZEB1	94.9	99.3	97.6	96.4	90.6	104.8	97.6	102.2	108.1	108.5
P37802	Transgelin-2 [OS=Homo sapiens]	81	17	157	17	199	22.4	8.25	361.26	17	TAGLN2	89.9	95.4	93.1	98.9	91.1	108	104.9	110.6	107.8	100.1
P37837	Transaldolase [OS=Homo sapiens]	48	19	114	19	337	37.5	6.81	212.18	19	TALDO1	91.8	92.2	91.9	114.4	120.8	93.9	94.5	95.2	101.2	104
P38117	Electron transfer flavoprotein subunit beta [OS=Homo sapiens]	55	14	63	14	255	27.8	8.1	125.69	14	ETFB	101.8	99.8	101.3	102	95.2	99.5	99.1	98.4	103.7	99.1
P38159	RNA-binding motif protein, X chromosome [OS=Homo sapiens]	63	38	215	12	391	42.3	10.05	369.33	38	RBMX	98.9	104.9	100.4	93.3	83.1	107.5	105.9	105.7	102.4	97.8
P38398	Breast cancer type 1 susceptibility protein [OS=Homo sapiens]	1	1	1	1	1863	207.6	5.41	0	1	BRCA1	97.8	80	107.3	93.6	80.5	103.3	117.3	96.1	119.5	104.5
P38432	Coilin [OS=Homo sapiens]	26	14	21	14	576	62.6	9.07	52.77	14	COIL	97.9	106.5	97.3	101	79.2	111.2	104.5	108.5	97.6	96.2
P38435	Vitamin K-dependent gamma-carboxylase [OS=Homo sapiens]	6	5	8	5	758	87.5	8.02	9.95	5	GGCX	120.7	110.6	103.5	101.3	95.8	88.1	94.6	97.6	98.2	89.6
P38606	V-type proton ATPase catalytic subunit A [OS=Homo sapiens]	32	16	31	16	617	68.3	5.52	79.08	16	ATP6V1A	101	91.4	101.1	109	107.2	96.7	96.3	96	101.6	99.6
P38646	Stress-70 protein, mitochondrial [OS=Homo sapiens]	67	55	489	54	679	73.6	6.16	1184.11	55	HSPA9	103.9	102.6	102.3	99.2	97.1	99	100.2	96.4	100.4	98.8
P38919	Eukaryotic initiation factor 4A-III [OS=Homo sapiens]	38	15	69	13	411	46.8	6.73	127.6	15	EIF4A3	102.1	94.7	102.6	97.4	91.4	102.3	108.4	106.5	93.6	101
P38935	DNA-binding protein SMUBP-2 [OS=Homo sapiens]	5	6	6	6	993	109.1	8.97	8.58	6	IGHMBP2	99.7	123.1	94.4	99.6	101.6	99.7	90.9	98.9	88.1	104
P39019	40S ribosomal protein S19 [OS=Homo sapiens]	69	16	121	16	145	16.1	10.32	211.69	16	RPS19	99.2	106.8	99.8	96.9	93.9	105.1	102.1	102.6	97.5	96.2
P39023	60S ribosomal protein L3 [OS=Homo sapiens]	47	25	137	25	403	46.1	10.18	281.35	25	RPL3	100.7	101.2	102.2	97	91.8	103.4	106.2	103.9	96.2	97.4
P39656	Dolichyl-diphosphooligosaccharide--protein glycosyltransferase 48 kDa subunit [OS=Homo sapiens]	10	5	16	5	456	50.8	6.55	23.48	5	DDOST	125.8	101.4	108.7	88.2	106.6	90	89.4	84.4	99.6	106.1
P39687	Acidic leucine-rich nuclear phosphoprotein 32 family member A [OS=Homo sapiens]	36	11	81	6	249	28.6	4.09	153.67	11	ANP32A	94.5	105.9	98.3	104	104.9	100.5	92.9	98.1	100.3	100.6
P39748	Flap endonuclease 1 [OS=Homo sapiens]	45	19	115	19	380	42.6	8.62	270.74	19	FEN1	101.1	103.4	103.9	97.8	95.5	100.2	100.6	100.7	100	96.7
P39880	Homeobox protein cut-like 1 [OS=Homo sapiens]	25	33	44	16	1505	164.1	5.9	76.83	33	CUX1	98.4	96.6	99.8	99.6	91.1	105.3	103.1	104.3	101.5	100.3
P40121	Macrophage-capping protein [OS=Homo sapiens]	35	12	65	12	348	38.5	6.19	180.13	12	CAPG	92	97	94.5	108.3	105.6	94.6	97	99.8	108.9	102.4
P40123	Adenylyl cyclase-associated protein 2 [OS=Homo sapiens]	20	8	29	6	477	52.8	6.37	62.66	8	CAP2	92.2	100	94.1	97.1	95.4	103.9	105.9	104.7	106.3	100.3
P40189	Interleukin-6 receptor subunit beta [OS=Homo sapiens]	7	4	4	4	918	103.5	5.95	11.04	4	IL6ST	112.6	114.7	107.2	105.4	107.3	86.4	89.8	92.3	79	105.3
P40222	Alpha-taxilin [OS=Homo sapiens]	55	28	66	26	546	61.9	6.52	173.34	28	TXLNA	99.8	99.5	96.4	94.2	97	105	108	100.4	101.3	98.2
P40227	T-complex protein 1 subunit zeta [OS=Homo sapiens]	45	24	167	24	531	58	6.68	421.95	24	CCT6A	101.3	97.8	99.5	103.8	107.8	97.2	100.7	98.5	96.7	96.7
P40306	Proteasome subunit beta type-10 [OS=Homo sapiens]	27	7	8	7	273	28.9	7.81	17	7	PSMB10	79.7	79.6	85.9	77.3	81	120.5	125.7	124.5	120.7	105.1
P40429	60S ribosomal protein L13a [OS=Homo sapiens]	47	12	99	12	203	23.6	10.93	186.73	12	RPL13A	99.2	99.5	100.1	96.3	90.7	106.7	107.3	104.1	96.3	99.7
P40692	DNA mismatch repair protein Mlh1 [OS=Homo sapiens]	11	8	11	8	756	84.5	5.72	21.95	8	MLH1	98	104.6	101.1	93.5	95.4	106.3	106	103.4	95.3	96.5
P40763	Signal transducer and activator of transcription 3 [OS=Homo sapiens]	25	14	34	14	770	88	6.3	96.83	14	STAT3	101.4	106.6	104.2	102.7	107.6	96.4	96	96.4	95.9	92.8
P40818	Ubiquitin carboxyl-terminal hydrolase 8 [OS=Homo sapiens]	11	10	13	10	1118	127.4	8.51	27.39	10	USP8	89	97.4	103	105.4	106.6	98.8	98.3	96.1	99.6	105.6
P40855	Peroxisomal biogenesis factor 19 [OS=Homo sapiens]	34	8	29	8	299	32.8	4.34	71.38	8	PEX19	96.1	89.7	92.1	96.2	100.7	103.5	105.3	103.3	107.5	105.7
P40925	Malate dehydrogenase, cytoplasmic [OS=Homo sapiens]	41	16	85	16	334	36.4	7.36	141.23	16	MDH1	95.8	98	94.2	104.4	109.2	97.8	93.3	98.1	106.9	102.3
P40926	Malate dehydrogenase, mitochondrial [OS=Homo sapiens]	68	22	177	22	338	35.5	8.68	427.75	22	MDH2	96	94.9	95.4	96.5	89.4	105.5	102.4	102.6	110	107.3
P40937	Replication factor C subunit 5 [OS=Homo sapiens]	28	8	14	8	340	38.5	7.2	30.12	8	RFC5	117.3	102.8	106.6	100	91.8	97.3	103.5	101.6	86.8	92.5
P40938	Replication factor C subunit 3 [OS=Homo sapiens]	32	9	15	9	356	40.5	8.34	41.93	9	RFC3	99.9	98	103.1	100.3	92.5	99.9	107.2	101.2	100	97.8
P40939	Trifunctional enzyme subunit alpha, mitochondrial [OS=Homo sapiens]	40	26	93	26	763	82.9	9.04	214.07	26	HADHA	101.2	93.9	98.7	95.6	90	102.3	102	102	109.8	104.7
P41091	Eukaryotic translation initiation factor 2 subunit 3 [OS=Homo sapiens]	43	17	50	17	472	51.1	8.4	88.97	17	EIF2S3	95.7	100.6	98.6	100.8	94.9	104.9	101.6	102.9	101.7	98.3
P41134	DNA-binding protein inhibitor ID-1 [OS=Homo sapiens]	44	5	9	5	155	16.1	6.99	22.57	5	ID1	107.3	89.5	110.3	86.7	84.9	113.7	100.6	100.6	107.2	99.1
P41162	ETS translocation variant 3 [OS=Homo sapiens]	12	4	4	4	512	57	8.57	4.85	4	ETV3	92.4	75.2	84.3	88.4	124.8	91.5	94	126.1	100.9	122.4
P41182	B-cell lymphoma 6 protein [OS=Homo sapiens]	2	1	1	1	706	78.8	7.94	3.23	1	BCL6	113.8	76.9	97.5	79.5	98.3	93	94.9	111.5	129.3	105.4
P41208	Centrin-2 [OS=Homo sapiens]	52	6	16	6	172	19.7	5	40.73	6	CETN2	96.7	95.7	100.9	94.2	92.4	104.6	107.3	107.3	99.5	101.5
P41214	Eukaryotic translation initiation factor 2D [OS=Homo sapiens]	24	9	16	9	584	64.7	7.65	49.38	9	EIF2D	88.3	98.5	102.1	101.1	98.6	107.2	97.2	105.2	103.4	98.4
P41223	Protein BUD31 homolog [OS=Homo sapiens]	50	9	21	9	144	17	8.82	46.37	9	BUD31	93.5	97.6	99.1	95.9	86	109.4	105.4	110.5	101.5	101.3
P41227	N-alpha-acetyltransferase 10 [OS=Homo sapiens]	40	12	37	12	235	26.4	5.64	70.39	12	NAA10	113.5	98.9	103.9	101.3	103.8	95	102.7	98.6	89.7	92.5
P41229	Lysine-specific demethylase 5C [OS=Homo sapiens]	6	8	11	7	1560	175.6	5.58	17.5	8	KDM5C	107.2	88.9	102.5	101.5	89.8	90.3	92.4	99.9	123.9	103.5
P41236	Protein phosphatase inhibitor 2 [OS=Homo sapiens]	32	5	17	5	205	23	4.74	39.3	5	PPP1R2	120	103.6	99.7	106.3	106.3	87.2	91.6	88.4	102.4	94.5
P41240	Tyrosine-protein kinase CSK [OS=Homo sapiens]	30	11	18	11	450	50.7	7.06	35.01	11	CSK	97.2	100.4	101.5	102.5	101.5	98.2	94.1	102.7	101	101
P41250	Glycine--tRNA ligase [OS=Homo sapiens]	48	34	150	34	739	83.1	7.03	334.96	34	GARS1	94.2	92.2	90.2	104.1	104.6	102.9	102	101.5	104	104.4
P41252	Isoleucine--tRNA ligase, cytoplasmic [OS=Homo sapiens]	26	28	88	28	1262	144.4	6.15	211.36	28	IARS1	99.2	89.9	98.6	101.6	103.6	97.3	101.6	99.6	99.4	109
P41567	Eukaryotic translation initiation factor 1 [OS=Homo sapiens]	50	6	50	6	113	12.7	7.44	155.22	6	EIF1	105.8	102.2	103.9	93.9	100.8	99.4	104.1	97.9	96.5	95.5
P41743	Protein kinase C iota type [OS=Homo sapiens]	9	5	9	4	596	68.2	5.85	16.42	5	PRKCI	105.3	108.6	100.6	98.2	105.5	98.9	91.7	99	96.4	95.9
P42025	Beta-centractin [OS=Homo sapiens]	19	6	41	1	376	42.3	6.4	78.51	6	ACTR1B	93.6	92.9	96.1	97.1	101.5	89.6	102.2	117.9	104.3	104.9
P42126	Enoyl-CoA delta isomerase 1, mitochondrial [OS=Homo sapiens]	9	2	4	2	302	32.8	8.54	11.96	2	ECI1	163.3	87.5	100.3	112.2	163.8	91.9	73.4	74.6	60.4	72.7
P42166	Lamina-associated polypeptide 2, isoform alpha [OS=Homo sapiens]	63	37	175	26	694	75.4	7.66	497.32	37	TMPO	100.8	103.2	106.8	96	89	102.1	103	101.3	97.5	100.4
P42167	Lamina-associated polypeptide 2, isoforms beta/gamma [OS=Homo sapiens]	65	24	125	13	454	50.6	9.38	368.01	24	TMPO	76.1	98.6	104.2	99.5	78.3	109.4	107.3	119.8	101.1	105.7
P42224	Signal transducer and activator of transcription 1-alpha/beta [OS=Homo sapiens]	25	14	46	14	750	87.3	6.05	117.18	14	STAT1	102.8	100.7	101.6	107.5	106.5	96.7	94.9	98	93.7	97.6
P42226	Signal transducer and activator of transcription 6 [OS=Homo sapiens]	10	6	6	6	847	94.1	6.23	11.99	6	STAT6	101.6	104	104.3	111.7	107	94.9	90.8	97.9	97.2	90.5
P42285	Exosome RNA helicase MTR4 [OS=Homo sapiens]	18	17	33	17	1042	117.7	6.52	75.39	17	MTREX	103.8	97.6	103.9	98.2	96	103.3	99.8	101.8	98	97.7
P42330	Aldo-keto reductase family 1 member C3 [OS=Homo sapiens]	23	7	18	7	323	36.8	7.94	42.37	7	AKR1C3	98	79.2	87.5	116	133.8	84.2	88.2	83.5	107.5	122
P42345	Serine/threonine-protein kinase mTOR [OS=Homo sapiens]	3	6	13	6	2549	288.7	7.17	30.02	6	MTOR	109.5	103	103.1	120.7	104.9	90	87.6	89.6	102	89.6
P42356	Phosphatidylinositol 4-kinase alpha [OS=Homo sapiens]	4	6	9	6	2102	236.7	7.06	19.29	6	PI4KA	113.4	97	91.1	100	89.5	97.1	106.7	96.7	95.3	113.1
P42566	Epidermal growth factor receptor substrate 15 [OS=Homo sapiens]	20	12	16	12	896	98.6	4.64	48.03	12	EPS15	96	95.5	98.9	97.1	104.9	100.6	100.2	106.8	103.9	96.2
P42574	Caspase-3 [OS=Homo sapiens]	15	4	8	3	277	31.6	6.54	17.34	4	CASP3	102.6	107.6	90	105.4	106.5	99.4	96.4	94.7	97.6	99.7
P42677	40S ribosomal protein S27 [OS=Homo sapiens]	51	7	40	2	84	9.5	9.45	74.14	7	RPS27	94.7	97.9	104.5	96.8	96.8	101.3	113.6	106.2	91.2	97
P42684	Tyrosine-protein kinase ABL2 [OS=Homo sapiens]	2	2	3	2	1182	128.3	8.07	9.36	2	ABL2	81.9	118.3	102.7	95.1	110.7	98.6	94.7	93.1	104	100.9
P42694	Probable helicase with zinc finger domain [OS=Homo sapiens]	3	4	7	4	1942	218.8	7.42	21.71	4	HELZ	56.2	117.3	97	81.9	125.5	106.1	96.3	115.9	105.4	98.3
P42695	Condensin-2 complex subunit D3 [OS=Homo sapiens]	10	11	23	10	1498	168.8	7.5	66.95	11	NCAPD3	101.3	108.7	105.5	96.7	93.7	104.8	106.5	94.1	92.1	96.5
P42696	RNA-binding protein 34 [OS=Homo sapiens]	29	14	19	14	430	48.5	10.11	31.51	14	RBM34	99	109.2	102.8	93.3	95.9	107.1	99.3	102.1	95.2	96
P42704	Leucine-rich PPR motif-containing protein, mitochondrial [OS=Homo sapiens]	43	53	168	53	1394	157.8	6.13	396.14	53	LRPPRC	110.5	97.8	107.5	95.6	92.1	101.2	102.5	96.3	98.7	97.7
P42765	3-ketoacyl-CoA thiolase, mitochondrial [OS=Homo sapiens]	57	15	43	15	397	41.9	8.09	132.19	15	ACAA2	98	99.2	101.8	103.2	95.1	99.1	95.7	95.2	108.8	104
P42766	60S ribosomal protein L35 [OS=Homo sapiens]	37	8	42	6	123	14.5	11.05	42.39	8	RPL35	102.7	100	100.9	94.9	95.4	103.1	107.7	100.9	94	100.4
P42773	Cyclin-dependent kinase 4 inhibitor C [OS=Homo sapiens]	32	5	10	5	168	18.1	6.52	25.61	5	CDKN2C	95.9	89.7	91	104.1	94	108.1	92.7	107.3	113.7	103.4
P42858	Huntingtin [OS=Homo sapiens]	1	2	2	2	3142	347.4	6.2	3.8	2	HTT	94.4	105.6	95.6	117.4	119.9	93	89.4	89.7	87.9	107.1
P42892	Endothelin-converting enzyme 1 [OS=Homo sapiens]	24	14	26	14	770	87.1	5.88	68.86	14	ECE1	119.5	104.7	117.5	93.2	94.1	92.8	93.7	91.8	97.5	95.1
P43034	Platelet-activating factor acetylhydrolase IB subunit beta [OS=Homo sapiens]	40	18	54	17	410	46.6	7.37	116.74	18	PAFAH1B1	104.5	98.2	96	110.6	114.7	95.8	95.3	95	93.4	96.4
P43121	Cell surface glycoprotein MUC18 [OS=Homo sapiens]	20	10	25	10	646	71.6	5.76	68.26	10	MCAM	103.1	100.8	102.3	104.5	93.6	97.6	96.2	93.7	101.9	106.3
P43155	Carnitine O-acetyltransferase [OS=Homo sapiens]	3	2	4	2	626	70.8	8.44	9.69	2	CRAT	113.7	88.2	87.2	96.6	86.8	107.6	95.4	101.1	114.9	108.4
P43243	Matrin-3 [OS=Homo sapiens]	45	42	151	42	847	94.6	6.25	308.1	42	MATR3	101.2	97.7	101.6	94.7	89.9	102.9	107.3	104.3	100.3	100
P43246	DNA mismatch repair protein Msh2 [OS=Homo sapiens]	22	16	34	16	934	104.7	5.77	91.05	16	MSH2	104.3	102.8	108.3	99.8	89.6	101.9	103.1	101.7	92.4	96
P43250	G protein-coupled receptor kinase 6 [OS=Homo sapiens]	3	2	2	2	576	65.9	8	4.14	2	GRK6	83.7	100.7	106.9	99.9	109.8	104.5	101.5	110.4	84.6	98.1
P43251	Biotinidase [OS=Homo sapiens]	7	3	4	3	543	61.1	6.25	9.28	3	BTD	116.4	105.5	91.7	108.3	105	86.1	100.9	99	80.7	106.4
P43304	Glycerol-3-phosphate dehydrogenase, mitochondrial [OS=Homo sapiens]	36	26	62	26	727	80.8	7.69	115.48	26	GPD2	107.3	105.5	103.4	92	93.6	95.4	96.9	96.7	104.9	104.3
P43307	Translocon-associated protein subunit alpha [OS=Homo sapiens]	21	4	16	4	286	32.2	4.49	41.82	4	SSR1	125	100.6	118.5	86	108.8	90.2	86.7	82.3	97.4	104.6
P43378	Tyrosine-protein phosphatase non-receptor type 9 [OS=Homo sapiens]	4	2	2	2	593	68	8.02	4.63	2	PTPN9	81.4	75.5	82.8	104.1	79.2	129.1	105.3	114.1	100	128.5
P43487	Ran-specific GTPase-activating protein [OS=Homo sapiens]	56	9	53	8	201	23.3	5.29	101.06	9	RANBP1	100.7	103.5	101.6	98.6	103.9	96.2	99.9	96.4	101.5	97.6
P43490	Nicotinamide phosphoribosyltransferase [OS=Homo sapiens]	53	22	155	22	491	55.5	7.15	332.61	22	NAMPT	83.8	82.6	85	109.9	115.6	100.2	100.4	102.4	109.3	110.8
P43686	26S proteasome regulatory subunit 6B [OS=Homo sapiens]	54	23	87	22	418	47.3	5.21	145.72	23	PSMC4	93.9	93.4	92.6	108.2	109.1	100.7	99.1	99.8	101.5	101.8
P43897	Elongation factor Ts, mitochondrial [OS=Homo sapiens]	29	8	13	8	325	35.4	8.38	23.91	8	TSFM	104.4	92.4	97.3	98.2	86.8	111.6	103.4	104.3	101.5	100.1
P45877	Peptidyl-prolyl cis-trans isomerase C [OS=Homo sapiens]	9	2	5	1	212	22.7	8.4	6.22	2	PPIC	116.4	89.9	95.6	101	100.6	97.6	100.8	101.3	91.3	105.5
P45880	Voltage-dependent anion-selective channel protein 2 [OS=Homo sapiens]	66	16	88	16	294	31.5	7.56	248.58	16	VDAC2	113.6	103.6	109.4	97.8	94.5	100.9	99	95.3	89	96.8
P45954	Short/branched chain specific acyl-CoA dehydrogenase, mitochondrial [OS=Homo sapiens]	7	2	2	2	432	47.5	6.99	6.02	2	ACADSB	93.6	110	90	101.6	91.2	99.9	100.8	86.6	99.9	126.4
P45973	Chromobox protein homolog 5 [OS=Homo sapiens]	53	11	64	10	191	22.2	5.86	148.83	11	CBX5	93.3	94.7	97.5	87.8	79.9	112.1	112.6	112.3	107	102.9
P45974	Ubiquitin carboxyl-terminal hydrolase 5 [OS=Homo sapiens]	36	30	96	29	858	95.7	5.03	237.98	30	USP5	95.3	98	98.5	104.4	107.4	99.3	94.5	99.2	101.7	101.7
P45983	Mitogen-activated protein kinase 8 [OS=Homo sapiens]	8	4	7	2	427	48.3	6.89	1.8	4	MAPK8	96.9	101.3	96.1	95.1	99.7	105.3	105.9	107.4	91	101.2
P45985	Dual specificity mitogen-activated protein kinase kinase 4 [OS=Homo sapiens]	16	5	13	5	399	44.3	8.07	23.9	5	MAP2K4	104.4	84.6	102.4	97.4	110.9	87.4	95.3	87	110.5	120.1
P46013	Proliferation marker protein Ki-67 [OS=Homo sapiens]	54	145	385	145	3256	358.5	9.45	799.08	145	MKI67	106.5	111.9	109.8	80.6	74.8	111.1	114	109.3	92.5	89.5
P46060	Ran GTPase-activating protein 1 [OS=Homo sapiens]	45	24	87	24	587	63.5	4.68	221.71	24	RANGAP1	103.4	102.2	103.5	100.1	102.8	98.3	100.6	98.7	92.8	97.7
P46063	ATP-dependent DNA helicase Q1 [OS=Homo sapiens]	23	17	30	17	649	73.4	7.88	60.26	17	RECQL	102	99.9	103.1	105.8	103.3	93.5	103.1	97.8	94.3	97.2
P46087	Probable 28S rRNA (cytosine(4447)-C(5))-methyltransferase [OS=Homo sapiens]	40	26	93	26	812	89.2	9.23	202.82	26	NOP2	100.3	105.5	103.1	99.6	94.9	102.7	100.3	99.5	95.1	99
P46100	Transcriptional regulator ATRX [OS=Homo sapiens]	11	27	35	26	2492	282.4	6.55	79.55	27	ATRX	97.6	98.4	102.8	98.7	86.9	104.7	102.7	104.2	104.7	99.4
P46108	Adapter molecule crk [OS=Homo sapiens]	42	10	30	10	304	33.8	5.55	79.74	10	CRK	101.1	100.5	94.8	102.9	106	99	98.3	96.9	102.1	98.5
P46109	Crk-like protein [OS=Homo sapiens]	43	9	33	9	303	33.8	6.74	84.83	9	CRKL	99.8	102.9	98.7	103.3	103.5	98.9	98.7	99.3	98.2	96.6
P46199	Translation initiation factor IF-2, mitochondrial [OS=Homo sapiens]	14	8	11	8	727	81.3	7.15	18.23	8	MTIF2	103.9	98.9	103.2	90.6	95	104.2	105.5	98.1	110.7	90
P46379	Large proline-rich protein BAG6 [OS=Homo sapiens]	19	17	38	17	1132	119.3	5.6	98	17	BAG6	98.8	97.5	97	96.3	102.3	101.7	98	99.4	103.8	105.1
P46459	Vesicle-fusing ATPase [OS=Homo sapiens]	39	29	83	28	744	82.5	6.95	171.9	29	NSF	102.7	99.2	101	104.7	96.1	99.4	99.8	100.5	98	98.5
P46527	Cyclin-dependent kinase inhibitor 1B [OS=Homo sapiens]	25	4	4	4	198	22.1	7.02	9.59	4	CDKN1B	87.1	96.1	91.2	110.6	101.6	91.8	97.3	95.6	111.7	117.1
P46531	Neurogenic locus notch homolog protein 1 [OS=Homo sapiens]	2	4	4	4	2555	272.3	5.12	4.48	4	NOTCH1	80.6	106.1	87.7	113.9	95.4	84.5	94.5	92.1	132.7	112.5
P46734	Dual specificity mitogen-activated protein kinase kinase 3 [OS=Homo sapiens]	32	9	17	9	347	39.3	7.43	34.87	9	MAP2K3	97.3	99.5	99.7	104.1	111.9	98.2	100.8	95.9	99.3	93.2
P46736	Lys-63-specific deubiquitinase BRCC36 [OS=Homo sapiens]	22	6	9	6	316	36	5.92	19.63	6	BRCC3	101.4	115.5	103.8	87.1	108.5	90.3	94.4	89.9	102.6	106.6
P46776	60S ribosomal protein L27a [OS=Homo sapiens]	38	7	47	7	148	16.6	11	81.03	7	RPL27A	102.7	101.4	101.4	97.5	93.8	104.2	105.3	101.4	97.4	94.8
P46777	60S ribosomal protein L5 [OS=Homo sapiens]	64	22	195	22	297	34.3	9.72	418.42	22	RPL5	99.4	103	102.6	95.1	95	103.3	104.3	101.3	98.6	97.5
P46778	60S ribosomal protein L21 [OS=Homo sapiens]	55	12	95	12	160	18.6	10.49	184.68	12	RPL21	99.5	103	101.7	95.3	92.8	104.7	103.6	102.9	98.1	98.4
P46779	60S ribosomal protein L28 [OS=Homo sapiens]	48	12	56	12	137	15.7	12.02	112.99	12	RPL28	105	104.4	102.4	97.7	90.3	104.1	104.8	102.6	95.5	93.3
P46781	40S ribosomal protein S9 [OS=Homo sapiens]	61	19	113	19	194	22.6	10.65	187.21	19	RPS9	101.2	91.6	98.3	100	91.8	105.9	110.1	106.2	93.4	101.4
P46782	40S ribosomal protein S5 [OS=Homo sapiens]	47	12	68	12	204	22.9	9.72	166.91	12	RPS5	94.5	100	99.9	92.2	93.7	107.7	105.2	103.6	102.3	100.9
P46783	40S ribosomal protein S10 [OS=Homo sapiens]	55	11	90	10	165	18.9	10.15	151.63	11	RPS10	100.1	105.6	99.3	94.2	92	105.4	106	102.1	99.6	95.7
P46821	Microtubule-associated protein 1B [OS=Homo sapiens]	48	96	340	94	2468	270.5	4.81	935.81	96	MAP1B	96	99.9	99.5	113.3	117.8	93.5	94.5	93.5	96.4	95.7
P46926	Glucosamine-6-phosphate isomerase 1 [OS=Homo sapiens]	33	6	12	4	289	32.6	6.92	32.79	6	GNPDA1	92.6	87.9	105.8	112.4	124.3	94.6	99.9	95.3	92.3	94.9
P46934	E3 ubiquitin-protein ligase NEDD4 [OS=Homo sapiens]	6	4	7	4	1319	149	6.58	30.17	4	NEDD4	108.8	74	93.8	105.4	111.9	98.4	102.2	99.2	94.9	111.6
P46937	Transcriptional coactivator YAP1 [OS=Homo sapiens]	40	12	36	12	504	54.4	5.17	113.51	12	YAP1	107.9	104.4	103.5	114	103.5	97	91.6	96.7	91.3	90.1
P46939	Utrophin [OS=Homo sapiens]	15	43	63	43	3433	394.2	5.33	129.73	43	UTRN	105.8	100.6	105.9	96.3	97.2	102.8	96.3	99.6	95.5	99.8
P46940	Ras GTPase-activating-like protein IQGAP1 [OS=Homo sapiens]	43	68	299	66	1657	189.1	6.48	748.68	68	IQGAP1	105.3	96.9	102.9	103.7	113.9	92.4	97.3	98.5	96.2	92.8
P46976	Glycogenin-1 [OS=Homo sapiens]	11	4	7	4	350	39.4	5.53	14.22	4	GYG1	104.8	128.7	115.6	89.9	106.6	98.5	90.7	85.2	87.3	92.7
P46977	Dolichyl-diphosphooligosaccharide--protein glycosyltransferase subunit STT3A [OS=Homo sapiens]	7	6	11	5	705	80.5	8.07	4.25	6	STT3A	128.8	107.9	116.6	89.6	104.3	84.2	88.3	78.1	101.4	100.9
P47712	Cytosolic phospholipase A2 [OS=Homo sapiens]	3	3	4	3	749	85.2	5.38	4.79	3	PLA2G4A	88	88.2	106.4	89.2	120.9	106.4	110.4	97.3	107.1	86.2
P47755	F-actin-capping protein subunit alpha-2 [OS=Homo sapiens]	50	8	29	7	286	32.9	5.85	93.9	8	CAPZA2	100.2	97.7	112.8	111.6	112.9	90.5	93.4	92.8	91.6	96.6
P47756	F-actin-capping protein subunit beta [OS=Homo sapiens]	52	16	95	16	277	31.3	5.59	178.92	16	CAPZB	101.1	109.1	103.5	108	110.3	94.2	89.9	93.8	95.9	94.4
P47813	Eukaryotic translation initiation factor 1A, X-chromosomal [OS=Homo sapiens]	60	8	33	8	144	16.5	5.24	68.6	8	EIF1AX	96.6	101.3	97.2	100.8	98.5	103.5	95.3	107.3	99.2	100.2
P47897	Glutamine--tRNA ligase [OS=Homo sapiens]	41	28	93	28	775	87.7	7.15	231.78	28	QARS1	104.6	96.7	101.7	100.1	103.9	95.9	98.7	99	99.2	100.2
P47914	60S ribosomal protein L29 [OS=Homo sapiens]	32	7	38	7	159	17.7	11.66	52.94	7	RPL29	99.5	107.7	103.5	94.1	93.2	104.7	103.8	102.3	97.5	93.8
P47985	Cytochrome b-c1 complex subunit Rieske, mitochondrial [OS=Homo sapiens]	35	9	29	9	274	29.6	8.32	70.97	9	UQCRFS1	114.2	106.8	113.4	95.6	91.8	90.6	93.6	91.9	102.6	99.5
P48047	ATP synthase subunit O, mitochondrial [OS=Homo sapiens]	49	9	33	9	213	23.3	9.96	67.78	9	ATP5PO	97.2	97.5	99.6	93.5	85.6	104.2	103.3	104.1	109.1	105.9
P48059	LIM and senescent cell antigen-like-containing domain protein 1 [OS=Homo sapiens]	26	7	16	6	325	37.2	8.05	36.51	7	LIMS1	97.7	92.3	96.1	103	108.2	101.8	102.1	102.2	99.8	96.9
P48060	Glioma pathogenesis-related protein 1 [OS=Homo sapiens]	17	5	6	5	266	30.3	8.48	13.22	5	GLIPR1	97.5	92.8	103	97.3	86.5	103.5	111.2	99	104.8	104.5
P48147	Prolyl endopeptidase [OS=Homo sapiens]	31	17	44	17	710	80.6	5.86	113.21	17	PREP	106	95	102.7	111.6	105.2	93.7	99.9	97.2	91.8	96.9
P48163	NADP-dependent malic enzyme [OS=Homo sapiens]	9	5	12	5	572	64.1	6.13	14.96	5	ME1	70.4	85.2	76.9	128.2	127.1	93.9	98.6	98.1	106.8	114.9
P48200	Iron-responsive element-binding protein 2 [OS=Homo sapiens]	13	10	10	10	963	105	7.05	13.12	10	IREB2	86.7	97.1	88.6	107.5	123.3	112.2	92.1	96.3	97.3	98.9
P48382	DNA-binding protein RFX5 [OS=Homo sapiens]	8	4	5	4	616	65.3	9.29	8.92	4	RFX5	108	119.4	135.9	119.8	104.4	80.2	70.8	109.9	77.6	74.1
P48426	Phosphatidylinositol 5-phosphate 4-kinase type-2 alpha [OS=Homo sapiens]	17	7	13	4	406	46.2	6.99	28.43	7	PIP4K2A	90	100.2	95.5	103.7	109.4	101.2	103.7	99.9	100.5	96
P48436	Transcription factor SOX-9 [OS=Homo sapiens]	3	2	2	2	509	56.1	6.81	4.54	2	SOX9	115.1	109.7	125.7	86.5	90.1	96.3	103.1	105.9	92.4	75.3
P48443	Retinoic acid receptor RXR-gamma [OS=Homo sapiens]	4	2	2	1	463	50.8	7.62	2.21	2	RXRG	103.3	95.3	109.8	103.8	79.7	99.5	104.2	93	100.6	110.7
P48444	Coatomer subunit delta [OS=Homo sapiens]	46	30	106	30	511	57.2	6.21	205.85	30	ARCN1	99.5	102.6	102.7	109.8	108.2	95.8	95.2	96	94.6	95.6
P48449	Lanosterol synthase [OS=Homo sapiens]	13	8	15	8	732	83.3	6.61	26.85	8	LSS	90.3	85.8	88.4	109.7	96.5	103.5	96.8	103	109.4	116.7
P48506	Glutamate--cysteine ligase catalytic subunit [OS=Homo sapiens]	12	6	9	5	637	72.7	6.09	23.34	6	GCLC	89.3	94.6	89.7	130.8	137.6	89.7	81.2	87.6	94.8	104.8
P48507	Glutamate--cysteine ligase regulatory subunit [OS=Homo sapiens]	28	6	28	6	274	30.7	6.02	79.5	6	GCLM	84.9	82.7	93.4	122.9	142.5	91	90.8	86.6	96.6	108.7
P48509	CD151 antigen [OS=Homo sapiens]	10	3	8	3	253	28.3	7.47	5.68	3	CD151	103	96.4	104.1	101.5	92.5	94.3	103.1	92.3	114.3	98.5
P48553	Trafficking protein particle complex subunit 10 [OS=Homo sapiens]	1	1	1	1	1259	142.1	6.04	2.37	1	TRAPPC10	98.4	112.5	83.2	108.8	108.7	98.2	95.6	85.1	98.6	111
P48556	26S proteasome non-ATPase regulatory subunit 8 [OS=Homo sapiens]	11	5	7	5	350	39.6	9.7	11.83	5	PSMD8	94.3	90.7	89.6	104.1	100.4	103.1	102.2	107.4	103.1	105.2
P48634	Protein PRRC2A [OS=Homo sapiens]	29	48	84	46	2157	228.7	9.45	158.01	48	PRRC2A	99	104.8	101.7	102.5	102.3	100.6	95.2	100.1	98.2	95.4
P48637	Glutathione synthetase [OS=Homo sapiens]	47	18	70	18	474	52.4	5.92	174	18	GSS	101	98.2	100.8	104.1	109.9	95	96.2	98	100.8	96
P48643	T-complex protein 1 subunit epsilon [OS=Homo sapiens]	58	31	224	30	541	59.6	5.66	466.76	31	CCT5	101.2	102.3	99.1	105.7	107.3	97.8	97.1	98	96.1	95.4
P48651	Phosphatidylserine synthase 1 [OS=Homo sapiens]	3	2	3	2	473	55.5	8.43	3.4	2	PTDSS1	116.9	114	112.5	109.6	80.6	92.6	101.3	100	82.6	89.8
P48681	Nestin [OS=Homo sapiens]	35	47	97	47	1621	177.3	4.36	219.65	47	NES	99	100.1	102.7	106.6	92.1	96.3	95.6	101.7	103.6	102.5
P48723	Heat shock 70 kDa protein 13 [OS=Homo sapiens]	5	2	5	2	471	51.9	5.76	7.29	2	HSPA13	122.1	86.6	137.4	86.9	100.9	99.5	94.7	84.8	93.9	93.3
P48729	Casein kinase I isoform alpha [OS=Homo sapiens]	17	5	7	5	337	38.9	9.57	13.67	5	CSNK1A1	104	111.4	103.8	88.7	92.9	100.9	107.3	100.7	90.2	99.9
P48730	Casein kinase I isoform delta [OS=Homo sapiens]	11	4	5	4	415	47.3	9.74	2.61	4	CSNK1D	97.9	73.9	121.9	78.9	113.8	95.8	91.2	98.9	119.5	108.2
P48739	Phosphatidylinositol transfer protein beta isoform [OS=Homo sapiens]	56	15	48	14	271	31.5	6.87	115.72	15	PITPNB	101	99.3	100.2	99.2	106.9	96.7	102.6	98.4	98.6	97.1
P48960	Adhesion G protein-coupled receptor E5 [OS=Homo sapiens]	29	16	54	16	835	91.8	6.87	170.67	16	ADGRE5	105.7	102.4	104	101.1	98.4	93.9	94.4	95.1	101.5	103.6
P49005	DNA polymerase delta subunit 2 [OS=Homo sapiens]	38	12	20	12	469	51.3	5.58	45.94	12	POLD2	99.2	98.4	104.4	93	94.5	104.6	105.8	100.6	102.4	97.1
P49006	MARCKS-related protein [OS=Homo sapiens]	79	9	34	8	195	19.5	4.67	110.05	9	MARCKSL1	91.4	92.2	101.4	94.5	84.1	94.5	86.8	109.5	133.9	111.7
P49023	Paxillin [OS=Homo sapiens]	38	17	62	17	591	64.5	6.19	136.44	17	PXN	96.3	96.5	98.6	104.1	108	101.3	97.1	104	99.4	94.6
P49069	Guided entry of tail-anchored proteins factor CAMLG [OS=Homo sapiens]	8	1	1	1	296	32.9	8.05	5.82	1	CAMLG	124	109.4	113.3	80.3	75.6	85.4	89.6	114.1	89.7	118.6
P49116	Nuclear receptor subfamily 2 group C member 2 [OS=Homo sapiens]	8	5	5	4	596	65.4	6.28	2.33	5	NR2C2	85.4	105.8	99.4	97.6	90.6	110.6	105.2	95.1	99.5	110.8
P49137	MAP kinase-activated protein kinase 2 [OS=Homo sapiens]	21	7	12	4	400	45.5	8.68	16.91	7	MAPKAPK2	100.5	104.5	97.6	103.7	97.9	94.1	93.8	103.6	109.8	94.6
P49189	4-trimethylaminobutyraldehyde dehydrogenase [OS=Homo sapiens]	39	18	57	18	494	53.8	5.87	111.91	18	ALDH9A1	96.9	97.9	99	102.4	101.3	100.3	98.4	99.4	103	101.3
P49207	60S ribosomal protein L34 [OS=Homo sapiens]	47	10	64	10	117	13.3	11.47	95.58	10	RPL34	101.7	107.2	102.4	94.9	91	104.5	104.6	101.8	98.1	93.7
P49257	Protein ERGIC-53 [OS=Homo sapiens]	11	7	17	6	510	57.5	6.77	16.32	7	LMAN1	120.1	109.1	103.4	84.6	95.2	99.5	88.4	84.3	111.8	103.6
P49321	Nuclear autoantigenic sperm protein [OS=Homo sapiens]	50	33	153	33	788	85.2	4.3	406.28	33	NASP	90.4	93.2	91.4	88	90.9	110.4	112.2	111.2	108.1	104.3
P49327	Fatty acid synthase [OS=Homo sapiens]	35	72	328	71	2511	273.3	6.44	849.8	72	FASN	89.8	85.3	89.6	103.6	102.2	103.7	102.5	103.9	112.6	106.9
P49354	Protein farnesyltransferase/geranylgeranyltransferase type-1 subunit alpha [OS=Homo sapiens]	8	3	3	3	379	44.4	5.08	4.89	3	FNTA	88	94.6	116	100.4	83.6	118.8	83.7	94.2	102.1	118.6
P49366	Deoxyhypusine synthase [OS=Homo sapiens]	32	10	26	10	369	40.9	5.36	59.3	10	DHPS	98.4	99.9	96.6	100.1	104.5	101.9	100.1	101.1	99.3	98.2
P49368	T-complex protein 1 subunit gamma [OS=Homo sapiens]	65	38	278	38	545	60.5	6.49	697.44	38	CCT3	97.6	102.9	99.3	103.9	104	99.6	98.3	99.6	97.9	96.9
P49406	39S ribosomal protein L19, mitochondrial [OS=Homo sapiens]	9	3	4	3	292	33.5	9.5	5.91	3	MRPL19	136.8	102.7	110.1	91.9	81.3	78.6	113.1	90.9	106.2	88.5
P49407	Beta-arrestin-1 [OS=Homo sapiens]	28	8	15	8	418	47	6.2	36.68	8	ARRB1	99.8	98.1	103.8	121.6	109.5	94.6	86.4	92.3	100.3	93.7
P49411	Elongation factor Tu, mitochondrial [OS=Homo sapiens]	48	19	83	19	452	49.5	7.61	211.29	19		102.8	102.1	100.8	98.8	90.6	104.1	99	99.7	101.3	100.7
P49419	Alpha-aminoadipic semialdehyde dehydrogenase [OS=Homo sapiens]	40	21	71	21	539	58.5	7.99	187.19	21	ALDH7A1	101.3	102.1	102.1	105.5	102.6	96.2	93.8	95.5	100.5	100.5
P49441	Inositol polyphosphate 1-phosphatase [OS=Homo sapiens]	7	2	4	2	399	44	5.26	13.84	2	INPP1	87.3	91.2	91.8	117.5	115.4	101.7	89.5	103.8	102.9	99.1
P49454	Centromere protein F [OS=Homo sapiens]	19	48	72	47	3114	357.3	5.1	155.73	48	CENPF	111.2	108.9	107.9	77.3	76.6	112.3	112.3	107.8	96.1	89.8
P49458	Signal recognition particle 9 kDa protein [OS=Homo sapiens]	50	5	22	5	86	10.1	7.97	27.11	5	SRP9	101.7	99.1	99.3	95.6	100.5	98	99.5	99.4	101.2	105.7
P49459	Ubiquitin-conjugating enzyme E2 A [OS=Homo sapiens]	7	1	4	1	152	17.3	5.15	5.03	1	UBE2A	102	119.8	103.1	100.6	97.8	96.7	108.1	98.8	85.5	87.6
P49585	Choline-phosphate cytidylyltransferase A [OS=Homo sapiens]	51	17	27	17	367	41.7	7.25	56.14	17	PCYT1A	85.7	97.1	95.7	111.2	112.7	98.6	96.8	99.9	101.5	100.8
P49588	Alanine--tRNA ligase, cytoplasmic [OS=Homo sapiens]	51	45	158	45	968	106.7	5.53	385.77	45	AARS1	87.5	85.1	86.5	92.1	95.5	108.7	112.4	109.9	113.3	109
P49589	Cysteine--tRNA ligase, cytoplasmic [OS=Homo sapiens]	39	28	105	28	748	85.4	6.76	200.42	28	CARS1	95.6	94.6	96	101.5	102.5	100.4	99.4	100.9	104.5	104.6
P49590	Histidine--tRNA ligase, mitochondrial [OS=Homo sapiens]	12	7	15	3	506	56.9	8.24	23.31	7	HARS2	102.7	103.1	99	93	88.8	103.3	94.3	103.2	107.2	105.4
P49591	Serine--tRNA ligase, cytoplasmic [OS=Homo sapiens]	39	17	60	17	514	58.7	6.43	168.06	17	SARS1	103.1	97.4	99.1	108.8	115.6	95.1	96.8	94	93.9	96.4
P49593	Protein phosphatase 1F [OS=Homo sapiens]	33	9	23	9	454	49.8	5.1	59.95	9	PPM1F	89.3	93.6	86.4	96.7	106	101.9	101.9	103.9	113.8	106.5
P49642	DNA primase small subunit [OS=Homo sapiens]	18	6	12	6	420	49.9	8.21	27.95	6	PRIM1	110.2	107	104.7	89.3	92.6	105.1	108.1	103.5	90.7	88.8
P49643	DNA primase large subunit [OS=Homo sapiens]	16	7	13	7	509	58.8	7.91	21.54	7	PRIM2	103.9	110.6	106.4	91.5	92.5	109.2	110.5	99.3	91.6	84.5
P49662	Caspase-4 [OS=Homo sapiens]	11	3	4	3	377	43.2	6	5.48	3	CASP4	101.9	87.4	103.5	147.2	115.3	88.1	94	106.2	91.1	65.3
P49711	Transcriptional repressor CTCF [OS=Homo sapiens]	22	14	26	14	727	82.7	6.96	62.73	14	CTCF	86.1	97.1	93	86.3	83.1	116.1	109.8	108.7	113	107
P49721	Proteasome subunit beta type-2 [OS=Homo sapiens]	19	4	7	4	201	22.8	7.02	12.82	4	PSMB2	91.9	100.3	93.5	84.8	101.3	103.4	98.3	107	97	122.5
P49736	DNA replication licensing factor MCM2 [OS=Homo sapiens]	33	23	50	23	904	101.8	5.52	114.76	23	MCM2	105.8	107.2	110.7	88.1	88	106.7	108.5	101.1	88.5	95.3
P49748	Very long-chain specific acyl-CoA dehydrogenase, mitochondrial [OS=Homo sapiens]	39	20	44	20	655	70.3	8.75	119.88	20	ACADVL	96.8	93.1	99.8	98.5	91.1	103.9	99.9	101.2	108.4	107.4
P49750	YLP motif-containing protein 1 [OS=Homo sapiens]	16	28	48	28	2146	241.5	6.55	109.39	28	YLPM1	95.6	117.7	98.4	99	90.2	98.9	102	100.1	101.1	97
P49755	Transmembrane emp24 domain-containing protein 10 [OS=Homo sapiens]	35	6	22	6	219	25	7.44	37.97	6	TMED10	126.7	108.1	113.4	91.8	113.5	87.7	87.5	76.5	94.2	100.6
P49756	RNA-binding protein 25 [OS=Homo sapiens]	31	25	62	25	843	100.1	6.32	126.06	25	RBM25	98.5	103.2	100.6	96.4	89.5	106.2	104.1	105.5	97.7	98.4
P49757	Protein numb homolog [OS=Homo sapiens]	13	8	11	7	651	70.8	8.51	20.49	8	NUMB	95.6	97.1	105.3	100	109.8	98.2	91.5	100.1	103.3	99
P49759	Dual specificity protein kinase CLK1 [OS=Homo sapiens]	2	1	1	1	484	57.3	8.87	0	1	CLK1	74.4	92.4	85.7	96.8	99.3	114.7	101.1	97.5	111.8	126.2
P49761	Dual specificity protein kinase CLK3 [OS=Homo sapiens]	6	3	5	3	638	73.5	9.92	7.33	3	CLK3	94	101.5	95.2	91	86.4	105.5	102.9	104	105.9	113.4
P49770	Translation initiation factor eIF-2B subunit beta [OS=Homo sapiens]	28	9	24	9	351	39	6.16	48.47	9	EIF2B2	100.4	97.5	101.5	101.2	98.5	100	103.7	100.3	95.5	101.4
P49773	Adenosine 5'-monophosphoramidase HINT1 [OS=Homo sapiens]	40	5	37	5	126	13.8	6.95	52.09	5	HINT1	104.4	106.7	104.2	104.5	115.9	88.2	88.5	87.4	103.3	96.8
P49789	Bis(5'-adenosyl)-triphosphatase [OS=Homo sapiens]	12	2	2	2	147	16.8	7.08	4.42	2	FHIT	113.8	115.2	95.2	123.1	98.1	86.7	91.9	90.4	91.3	94.3
P49790	Nuclear pore complex protein Nup153 [OS=Homo sapiens]	34	32	74	32	1475	153.8	8.73	191.44	32	NUP153	95.4	106.1	101.2	100.5	93.5	105	98.2	103.5	97.6	99.1
P49792	E3 SUMO-protein ligase RanBP2 [OS=Homo sapiens]	34	85	197	67	3224	358	6.2	429.17	85	RANBP2	98.2	98.9	98.7	101.2	98.2	99.1	100.1	99.8	99.7	106.1
P49795	Regulator of G-protein signaling 19 [OS=Homo sapiens]	10	2	3	2	217	24.6	5.62	6.84	2	RGS19	120.5	103.7	107.7	92.8	119.1	98.5	75.3	75.9	95.1	111.4
P49796	Regulator of G-protein signaling 3 [OS=Homo sapiens]	4	4	4	4	1198	132.3	6.28	4.14	4	RGS3	102.1	115.6	97.3	90.4	91.7	117.9	99.9	84.2	107.1	93.9
P49810	Presenilin-2 [OS=Homo sapiens]	4	2	3	2	448	50.1	4.59	7.12	2	PSEN2	118.4	103.7	92.8	107.5	116.3	86.3	94.5	83.3	93.5	103.8
P49815	Tuberin [OS=Homo sapiens]	5	7	12	7	1807	200.5	7.31	36.58	7	TSC2	94.2	92.6	96.6	100.5	105	98.6	92.3	99.9	109.9	110.4
P49821	NADH dehydrogenase [ubiquinone] flavoprotein 1, mitochondrial [OS=Homo sapiens]	37	10	20	10	464	50.8	8.21	53.57	10	NDUFV1	98.6	98.1	94.6	105.8	84.7	108.1	101.1	101.7	103.6	103.6
P49840	Glycogen synthase kinase-3 alpha [OS=Homo sapiens]	31	8	16	6	483	50.9	8.75	56.31	8	GSK3A	95.5	108.1	96.6	94.2	109.1	97.6	101.5	99.1	101.3	96.9
P49841	Glycogen synthase kinase-3 beta [OS=Homo sapiens]	24	8	12	6	420	46.7	8.78	31.96	8	GSK3B	100.6	97.7	99.5	107.3	102.2	98.4	99.2	97.9	99.2	98.1
P49848	Transcription initiation factor TFIID subunit 6 [OS=Homo sapiens]	16	9	10	9	677	72.6	8.6	21.09	9	TAF6	105	106.5	100.4	92.8	83.4	108.1	103.4	105.8	92	102.6
P49902	Cytosolic purine 5'-nucleotidase [OS=Homo sapiens]	12	5	6	5	561	64.9	6.14	14.44	5	NT5C2	100	104.4	86	113.6	105.7	106.1	101.9	97	88.5	96.8
P49903	Selenide, water dikinase 1 [OS=Homo sapiens]	19	5	15	5	392	42.9	5.97	38.61	5	SEPHS1	97.5	96.6	99.9	98.9	105.9	98.1	99.4	96.7	106.2	100.7
P49914	5-formyltetrahydrofolate cyclo-ligase [OS=Homo sapiens]	12	2	2	2	203	23.2	7.88	4.66	2	MTHFS	109.5	87	110.1	87.7	97.1	96.2	107.7	92.5	114.4	97.8
P49915	GMP synthase [glutamine-hydrolyzing] [OS=Homo sapiens]	52	32	76	32	693	76.7	6.87	151.3	32	GMPS	97.1	95.9	100.2	98.6	100.4	100.2	101.1	99.6	100.2	106.7
P49916	DNA ligase 3 [OS=Homo sapiens]	26	21	22	21	1009	112.8	9.01	38.96	21	LIG3	92.5	102	96.4	97.1	93.3	105	102.5	103.4	104.6	103
P49917	DNA ligase 4 [OS=Homo sapiens]	11	7	10	7	911	103.9	7.96	25.81	7	LIG4	97.5	89.9	93.1	97.3	104.5	100	111.4	104.1	106	96
P49959	Double-strand break repair protein MRE11 [OS=Homo sapiens]	33	19	42	19	708	80.5	5.9	96.91	19	MRE11	105.3	98.8	107.2	103.8	97.7	95.3	101.6	103.7	91.9	94.6
P50135	Histamine N-methyltransferase [OS=Homo sapiens]	21	4	7	4	292	33.3	5.34	21.42	4	HNMT	108.9	100.5	96.8	118	98.7	89.6	102.7	102	99	83.8
P50148	Guanine nucleotide-binding protein G(q) subunit alpha [OS=Homo sapiens]	6	2	3	1	359	42.1	5.68	6.13	2	GNAQ	123.4	103.8	109.4	91.1	146.6	86.4	74.4	71.3	91.8	101.8
P50213	Isocitrate dehydrogenase [NAD] subunit alpha, mitochondrial [OS=Homo sapiens]	27	10	16	10	366	39.6	6.92	30.4	10	IDH3A	103.3	108.1	109.6	98.2	90.1	98.2	102.1	98.4	96.2	95.9
P50281	Matrix metalloproteinase-14 [OS=Homo sapiens]	22	14	30	14	582	65.9	7.77	42.91	14	MMP14	95.9	91.9	86.2	123.7	113.5	90.4	87.9	92	107.1	111.3
P50336	Protoporphyrinogen oxidase [OS=Homo sapiens]	3	1	2	1	477	50.7	8.16	3.88	1	PPOX	113.1	101.4	108.1	99.3	90.9	95.7	96.8	86.3	108.4	100
P50395	Rab GDP dissociation inhibitor beta [OS=Homo sapiens]	71	37	187	27	445	50.6	6.47	440.4	37	GDI2	100.5	95.9	99.2	105.9	107.1	96.8	100.8	99	96.2	98.6
P50402	Emerin [OS=Homo sapiens]	53	10	28	10	254	29	5.5	60.3	10	EMD	108.3	107.4	106.7	99.7	91.6	101.9	97.6	98.2	92.7	95.9
P50416	Carnitine O-palmitoyltransferase 1, liver isoform [OS=Homo sapiens]	11	7	12	7	773	88.3	8.65	27.91	7	CPT1A	104.9	103.2	104.5	96.3	98.4	96.2	97.4	97.1	105.6	96.4
P50453	Serpin B9 [OS=Homo sapiens]	31	10	37	9	376	42.4	5.86	76.48	10	SERPINB9	93.7	89.1	89.2	97.5	98.2	101.6	102.4	103.4	113.6	111.2
P50454	Serpin H1 [OS=Homo sapiens]	52	19	104	19	418	46.4	8.69	236.53	19	SERPINH1	113	107.4	110.6	103.2	107.2	91.5	90.7	92.2	91.8	92.4
P50479	PDZ and LIM domain protein 4 [OS=Homo sapiens]	34	9	18	9	330	35.4	7.91	50.29	9	PDLIM4	96.8	94.9	103.3	103.5	111.9	96.6	90	97.5	104.9	100.5
P50502	Hsc70-interacting protein [OS=Homo sapiens]	33	14	58	14	369	41.3	5.27	113.85	14	ST13	99.1	100.8	95.6	99.1	102.2	100.5	97.6	100.3	99.6	105.2
P50542	Peroxisomal targeting signal 1 receptor [OS=Homo sapiens]	5	2	4	2	639	70.8	4.54	8.87	2	PEX5	100.6	112.4	90	90.3	102.8	101.8	84	90.5	111.7	115.8
P50548	ETS domain-containing transcription factor ERF [OS=Homo sapiens]	5	2	4	2	548	58.7	7.3	2.74	2	ERF	83.4	123.8	85.7	79.6	107.8	106.3	109.7	98.5	102.2	103.1
P50552	Vasodilator-stimulated phosphoprotein [OS=Homo sapiens]	47	20	61	20	380	39.8	8.94	139.11	20	VASP	95.1	89.8	93.2	103.5	111.9	99.1	102.3	97.1	106.3	101.8
P50570	Dynamin-2 [OS=Homo sapiens]	29	24	71	11	870	98	7.44	127.43	24	DNM2	102.3	95.5	100.9	105.9	105.5	95.3	98.2	99.7	100.8	95.9
P50579	Methionine aminopeptidase 2 [OS=Homo sapiens]	54	22	87	22	478	52.9	5.82	206.17	22	METAP2	99.4	104.5	100.4	100.8	104.5	101.8	99.2	98.9	92.2	98.4
P50583	Bis(5'-nucleosyl)-tetraphosphatase [asymmetrical] [OS=Homo sapiens]	21	3	5	3	147	16.8	5.35	9.93	3	NUDT2	99.8	76.8	114.3	101.9	88.5	101.9	105.1	100.8	103.9	106.9
P50613	Cyclin-dependent kinase 7 [OS=Homo sapiens]	18	7	13	7	346	39	8.47	25.27	7	CDK7	96.6	102.4	103	98.3	102.5	104.7	102.4	96.5	101.5	92
P50747	Biotin--protein ligase [OS=Homo sapiens]	8	3	3	3	726	80.7	5.62	8.11	3	HLCS	104.7	123.7	117	108.5	82.1	98.9	63.4	87.7	113.3	100.7
P50748	Kinetochore-associated protein 1 [OS=Homo sapiens]	2	4	5	4	2209	250.6	5.97	7.04	4	KNTC1	111.7	105.6	107.9	97.7	102.2	94.2	97.8	96.8	95.2	90.9
P50750	Cyclin-dependent kinase 9 [OS=Homo sapiens]	18	7	26	6	372	42.8	8.79	44.07	7	CDK9	101.7	101	97.7	97.6	98.8	99.8	105.3	101.3	97.1	99.5
P50851	Lipopolysaccharide-responsive and beige-like anchor protein [OS=Homo sapiens]	8	19	29	19	2863	318.9	5.6	69.67	19	LRBA	91.3	97.6	94.6	104.2	99.3	105.1	98.3	102.9	102.6	104
P50895	Basal cell adhesion molecule [OS=Homo sapiens]	9	5	6	5	628	67.4	5.81	13.41	5	BCAM	99	110.8	125.8	98.6	84.9	92.2	84.2	92.9	104.7	106.9
P50897	Palmitoyl-protein thioesterase 1 [OS=Homo sapiens]	24	5	10	5	306	34.2	6.52	27	5	PPT1	90.5	104	96.9	89.9	85.4	105	109.7	103.3	105.3	110
P50914	60S ribosomal protein L14 [OS=Homo sapiens]	39	10	82	10	215	23.4	10.93	150.61	10	RPL14	96.5	99.7	103.1	95.3	95.1	102.8	107.5	102.1	96.5	101.4
P50990	T-complex protein 1 subunit theta [OS=Homo sapiens]	66	43	306	43	548	59.6	5.6	665.52	43	CCT8	99.5	100.8	98.8	105	105.8	98.5	98.1	99.4	96.7	97.4
P50991	T-complex protein 1 subunit delta [OS=Homo sapiens]	68	35	274	34	539	57.9	7.83	719.8	35	CCT4	98.6	100.9	101.5	102.9	105.6	98.3	100.5	98.4	97.3	96.1
P50995	Annexin A11 [OS=Homo sapiens]	34	17	59	16	505	54.4	7.65	128.62	17	ANXA11	102.1	99	97.2	110.8	107.8	92.8	93.7	95.4	101.8	99.5
P51003	Poly(A) polymerase alpha [OS=Homo sapiens]	21	12	21	11	745	82.8	7.37	58.08	12	PAPOLA	82.7	101.1	96.3	105.5	118.6	94.4	96.3	103.9	96.2	104.9
P51114	RNA-binding protein FXR1 [OS=Homo sapiens]	46	28	86	25	621	69.7	6.15	212.9	28	FXR1	100	101.4	102.9	100.3	98.8	106.3	104.5	97.3	94.4	94.2
P51116	RNA-binding protein FXR2 [OS=Homo sapiens]	44	21	47	17	673	74.2	6.23	125.14	21	FXR2	97.2	105.9	98.6	101	104.6	102.1	96.9	101	92.3	100.5
P51148	Ras-related protein Rab-5C [OS=Homo sapiens]	69	12	58	9	216	23.5	8.41	160.92	12	RAB5C	103.1	97.8	100.5	99.8	100.4	99.4	97.9	98.6	101.4	101.1
P51149	Ras-related protein Rab-7a [OS=Homo sapiens]	61	11	50	11	207	23.5	6.7	146.77	11	RAB7A	105	97	100.9	103.1	105.2	96	96.6	93.8	98.7	103.7
P51151	Ras-related protein Rab-9A [OS=Homo sapiens]	19	3	3	3	201	22.8	5.47	7.2	3	RAB9A	102.9	107	101	108.6	119.2	88.8	95.1	90	92.9	94.5
P51153	Ras-related protein Rab-13 [OS=Homo sapiens]	37	8	30	5	203	22.8	9.19	65.13	8	RAB13	109	100.9	108.2	97.3	99.9	95.4	98.3	95.8	97.4	98
P51159	Ras-related protein Rab-27A [OS=Homo sapiens]	14	3	4	3	221	24.9	5.22	8.95	3	RAB27A	117.9	87.4	95.6	102.9	110.2	89.2	102.3	96.6	92.6	105.3
P51397	Death-associated protein 1 [OS=Homo sapiens]	16	2	17	2	102	11.2	9.32	20.65	2	DAP	97.6	112.7	101.9	110	109.5	97.8	86	93.8	99.4	91.3
P51398	28S ribosomal protein S29, mitochondrial [OS=Homo sapiens]	20	7	13	7	398	45.5	8.88	25.29	7	DAP3	97.8	105.9	99	99.5	88.6	108.6	98.6	101.3	100.1	100.7
P51452	Dual specificity protein phosphatase 3 [OS=Homo sapiens]	39	5	28	5	185	20.5	7.8	70.18	5	DUSP3	91.9	91.4	90.7	103.5	105.7	104.5	99.1	104.2	104.9	104
P51531	Probable global transcription activator SNF2L2 [OS=Homo sapiens]	8	12	17	7	1590	181.2	7.2	33.97	12	SMARCA2	95.1	94.4	105.9	98.2	85.4	106.7	101.3	98.7	108.2	106
P51532	Transcription activator BRG1 [OS=Homo sapiens]	17	23	42	18	1647	184.5	7.88	94.92	23	SMARCA4	99.3	102.5	106.1	91.7	87.8	102.7	106.1	102	102.3	99.6
P51553	Isocitrate dehydrogenase [NAD] subunit gamma, mitochondrial [OS=Homo sapiens]	5	2	4	2	393	42.8	8.5	3.65	2	IDH3G	107.9	110.5	100.8	109.1	81.4	110	93.5	103	98	85.8
P51570	Galactokinase [OS=Homo sapiens]	22	8	16	8	392	42.2	6.46	14.42	8	GALK1	98.2	99.7	106.4	103.3	103.2	96.9	95.8	95.1	96.1	105.3
P51571	Translocon-associated protein subunit delta [OS=Homo sapiens]	21	5	10	5	173	19	6.15	23.23	5	SSR4	121.9	102.5	105.7	83.7	103.1	89.8	88.3	78.5	100.7	125.8
P51572	B-cell receptor-associated protein 31 [OS=Homo sapiens]	42	22	103	21	246	28	8.44	129.04	22	BCAP31	104.6	104.8	102.5	102.8	89.6	97.2	100.5	99.3	102.3	96.4
P51580	Thiopurine S-methyltransferase [OS=Homo sapiens]	6	1	1	1	245	28.2	6.23	2.58	1	TPMT	97	86.9	106.4	131.3	94.7	97.9	70.4	94.2	119.9	101.3
P51608	Methyl-CpG-binding protein 2 [OS=Homo sapiens]	32	14	20	14	486	52.4	9.95	35.21	14	MECP2	100.6	98.3	100.9	103	95.4	101.4	95.2	97.1	102.5	105.7
P51610	Host cell factor 1 [OS=Homo sapiens]	20	32	88	32	2035	208.6	7.46	208.98	32	HCFC1	95.1	101.5	97.7	97.9	94.7	103	100.8	103.2	103.2	103
P51617	Interleukin-1 receptor-associated kinase 1 [OS=Homo sapiens]	3	2	2	2	712	76.5	6.62	5.21	2	IRAK1	94.7	91.5	97.3	92.5	107.3	101.1	110.2	104.8	109.2	91.4
P51648	Aldehyde dehydrogenase family 3 member A2 [OS=Homo sapiens]	13	5	14	5	485	54.8	7.88	34.31	5	ALDH3A2	106.4	96.1	104.6	108	93.9	89.4	94.5	95	102.7	109.3
P51659	Peroxisomal multifunctional enzyme type 2 [OS=Homo sapiens]	38	20	48	20	736	79.6	8.84	108.09	20	HSD17B4	100.2	98.5	100.4	95.5	101.3	106.5	90	94.1	109.5	103.9
P51665	26S proteasome non-ATPase regulatory subunit 7 [OS=Homo sapiens]	28	7	32	7	324	37	6.77	98.64	7	PSMD7	90.9	91.5	92.5	103.7	102.9	103.6	102.7	102.7	106.5	103
P51692	Signal transducer and activator of transcription 5B [OS=Homo sapiens]	5	4	4	4	787	89.8	6.05	8.8	4	STAT5B	124.9	96.2	108.3	101.4	100.8	95.8	89.6	97.3	100.3	85.4
P51784	Ubiquitin carboxyl-terminal hydrolase 11 [OS=Homo sapiens]	5	4	7	4	963	109.7	5.45	16.26	4	USP11	93.5	92.5	93.5	109.7	121.1	93	91.4	97.3	105.4	102.7
P51809	Vesicle-associated membrane protein 7 [OS=Homo sapiens]	14	2	3	2	220	24.9	8.6	10.42	2	VAMP7	117.7	108.7	111.3	95.1	88.7	87.4	99.3	96.2	104.3	91.3
P51826	AF4/FMR2 family member 3 [OS=Homo sapiens]	1	1	1	1	1226	133.4	8.1	0	1	AFF3	93.9	119.3	139.4	140.7	95.9	92	74.3	97.2	94	53.4
P51858	Hepatoma-derived growth factor [OS=Homo sapiens]	75	23	124	22	240	26.8	4.73	268.06	23	HDGF	95.8	101.4	99.3	103.8	104.9	98.3	96.9	101	101.7	96.8
P51946	Cyclin-H [OS=Homo sapiens]	11	4	4	4	323	37.6	7.15	5.88	4	CCNH	94.5	106.9	112.2	101.8	97.5	100.9	104.1	97.2	87.2	97.7
P51948	CDK-activating kinase assembly factor MAT1 [OS=Homo sapiens]	19	5	12	5	309	35.8	6.09	21.1	5	MNAT1	77.7	113.7	103.2	95.2	103.8	109.5	86.5	107.7	92.3	110.4
P51957	Serine/threonine-protein kinase Nek4 [OS=Homo sapiens]	4	2	2	2	841	94.5	7.9	5.85	2	NEK4	91.1	92.8	147.6	69	81.6	124.9	107.8	114.9	98.2	72.2
P51965	Ubiquitin-conjugating enzyme E2 E1 [OS=Homo sapiens]	25	4	12	4	193	21.4	8.53	35	4	UBE2E1	101.6	99.4	101.2	108.5	110.3	94.7	102.1	100.3	89	92.9
P51970	NADH dehydrogenase [ubiquinone] 1 alpha subcomplex subunit 8 [OS=Homo sapiens]	20	4	5	4	172	20.1	7.65	3.96	4	NDUFA8	110.5	106.6	104.4	90.6	83.1	92.7	97.9	103.5	102.2	108.5
P51991	Heterogeneous nuclear ribonucleoprotein A3 [OS=Homo sapiens]	48	15	87	12	378	39.6	9.01	128.25	15	HNRNPA3	97.5	99.1	103.2	95.3	87.8	103.5	104.9	105	102.1	101.6
P52209	6-phosphogluconate dehydrogenase, decarboxylating [OS=Homo sapiens]	42	20	108	20	483	53.1	7.23	287.97	20	PGD	105.9	98.7	106.6	122.5	128.4	83.1	86.4	84.5	93.2	90.7
P52272	Heterogeneous nuclear ribonucleoprotein M [OS=Homo sapiens]	65	48	295	48	730	77.5	8.7	668.66	48	HNRNPM	96.6	98.7	99.1	95	90.3	105.5	104.1	105.4	102.9	102.5
P52292	Importin subunit alpha-1 [OS=Homo sapiens]	43	19	84	19	529	57.8	5.4	220.84	19	KPNA2	110.8	107.8	109.4	92.4	95.3	102.2	104.9	99	87.6	90.5
P52294	Importin subunit alpha-5 [OS=Homo sapiens]	19	10	25	5	538	60.2	5.01	50.46	10	KPNA1	106.2	100.2	127.6	94.3	97.6	91.3	106.1	90.5	94.8	91.4
P52298	Nuclear cap-binding protein subunit 2 [OS=Homo sapiens]	37	9	15	9	156	18	8.21	15.38	9	NCBP2	95	88.7	104.4	99.6	100.2	97.4	104.3	106.4	97.7	106.3
P52306	Rap1 GTPase-GDP dissociation stimulator 1 [OS=Homo sapiens]	33	18	63	17	607	66.3	5.31	142.4	18	RAP1GDS1	105.3	99.2	103.7	99.5	101.1	96.9	101.6	98.1	96.9	97.6
P52434	DNA-directed RNA polymerases I, II, and III subunit RPABC3 [OS=Homo sapiens]	27	4	6	4	150	17.1	4.68	11.09	4	POLR2H	127.6	95.4	111.2	98.3	108.6	91.7	95	89.9	87.6	94.8
P52565	Rho GDP-dissociation inhibitor 1 [OS=Homo sapiens]	45	12	111	12	204	23.2	5.11	203.68	12	ARHGDIA	97.5	99.2	95.3	100.7	103.7	101.6	97.5	100	102.6	101.8
P52566	Rho GDP-dissociation inhibitor 2 [OS=Homo sapiens]	65	13	33	13	201	23	5.21	48.8	13	ARHGDIB	106.3	108.7	101.6	107.2	109.9	94.7	89.7	92.1	90.7	99
P52594	Arf-GAP domain and FG repeat-containing protein 1 [OS=Homo sapiens]	22	9	21	8	562	58.2	8.63	54.05	9	AGFG1	96.1	102.1	97.8	101.4	115.1	96.1	95	101.1	97.4	97.9
P52597	Heterogeneous nuclear ribonucleoprotein F [OS=Homo sapiens]	42	14	117	12	415	45.6	5.58	340.92	14	HNRNPF	101.1	99.6	101.8	96.3	90.9	104.5	104.2	102.5	98.9	100.2
P52655	Transcription initiation factor IIA subunit 1 [OS=Homo sapiens]	11	4	9	4	376	41.5	4.55	20.19	4	GTF2A1	108.1	103.5	103	104.1	103.8	101.1	91	98.5	94.8	92.2
P52657	Transcription initiation factor IIA subunit 2 [OS=Homo sapiens]	22	3	8	3	109	12.4	6.62	8.65	3	GTF2A2	105.4	102.3	102.7	111.6	93.6	100.3	97.3	99.5	89.5	97.8
P52701	DNA mismatch repair protein Msh6 [OS=Homo sapiens]	30	33	77	33	1360	152.7	6.9	161.8	33	MSH6	104.3	105.3	106.9	96.1	94.3	99.6	104.8	101.3	95.6	91.8
P52732	Kinesin-like protein KIF11 [OS=Homo sapiens]	23	23	42	23	1056	119.1	5.64	95.62	23	KIF11	111.7	117.1	111.5	88	90.7	101.4	107.8	103.2	87.5	81.2
P52735	Guanine nucleotide exchange factor VAV2 [OS=Homo sapiens]	9	7	9	7	878	101.2	7.08	21.62	7	VAV2	97.1	84.3	99.7	94.8	97.1	103.8	106.8	106.6	104.5	105.3
P52739	Zinc finger protein 131 [OS=Homo sapiens]	2	1	1	1	623	71.4	5.19	3.33	1	ZNF131	96.5	115.2	85.4	97	88.2	117.5	102.2	111.6	92.4	94.1
P52747	Zinc finger protein 143 [OS=Homo sapiens]	9	5	5	5	638	68.9	6.05	3.95	5	ZNF143	108.2	116.8	105.1	106.2	112.3	107.2	95.1	88.6	88.1	72.2
P52756	RNA-binding protein 5 [OS=Homo sapiens]	15	12	19	10	815	92.1	6.28	29.14	12	RBM5	92.5	99.3	95.2	101.2	96.9	106.9	103.9	105.6	93.4	104.9
P52758	2-iminobutanoate/2-iminopropanoate deaminase [OS=Homo sapiens]	7	1	2	1	137	14.5	8.68	2.09	1	RIDA	92.6	57.1	69.9	71.6	158.9	104.6	93.9	116.4	96.4	138.5
P52788	Spermine synthase [OS=Homo sapiens]	48	16	32	16	366	41.2	5.02	99.68	16	SMS	107.4	98.8	92.4	104.2	101.7	99.6	101.9	98.1	96.5	99.5
P52789	Hexokinase-2 [OS=Homo sapiens]	30	24	47	23	917	102.3	6.05	96.22	24	HK2	107.1	104.5	108.9	112.9	108.6	91.5	96.4	92.6	87.5	90
P52799	Ephrin-B2 [OS=Homo sapiens]	12	3	4	3	333	36.9	8.85	11.73	3	EFNB2	93.8	91.3	73.6	84	90.8	108.9	114.1	110.7	98.6	134.2
P52815	39S ribosomal protein L12, mitochondrial [OS=Homo sapiens]	35	5	40	5	198	21.3	8.87	107.29	5	MRPL12	107.5	114.5	107.4	98.1	90.8	97.5	99.9	89	98.9	96.4
P52888	Thimet oligopeptidase [OS=Homo sapiens]	32	23	47	23	689	78.8	6.05	94.23	23	THOP1	104.6	100.9	104.7	104.9	103.2	95.6	98.6	98.8	95.1	93.6
P52907	F-actin-capping protein subunit alpha-1 [OS=Homo sapiens]	62	12	95	11	286	32.9	5.69	345.21	12	CAPZA1	105.7	103.2	104.9	105.4	104.7	95	95.5	95.7	95.3	94.6
P52926	High mobility group protein HMGI-C [OS=Homo sapiens]	58	6	14	6	109	11.8	10.62	48.26	6	HMGA2	92.4	107.9	107	104.4	81.9	102.2	93.9	104.6	103.7	102.2
P52943	Cysteine-rich protein 2 [OS=Homo sapiens]	44	6	20	6	208	22.5	8.72	38.29	6	CRIP2	94.9	98.7	102.9	108.8	103.6	94.5	90.3	100.6	104.3	101.3
P52948	Nuclear pore complex protein Nup98-Nup96 [OS=Homo sapiens]	15	24	59	24	1817	197.5	6.4	110.92	24	NUP98	97	107.8	102.2	94.9	97.1	104.1	103	100.3	97	96.5
P53004	Biliverdin reductase A [OS=Homo sapiens]	20	6	16	6	296	33.4	6.44	24.63	6	BLVRA	99.3	90.5	92	112.4	102.6	98.7	97.3	102.6	95.6	109
P53007	Tricarboxylate transport protein, mitochondrial [OS=Homo sapiens]	17	6	13	6	311	34	9.89	26.71	6	SLC25A1	90.5	89.2	97.2	94.7	84.4	100.5	107.9	102.9	121.2	111.7
P53041	Serine/threonine-protein phosphatase 5 [OS=Homo sapiens]	40	17	46	16	499	56.8	6.28	110.47	17	PPP5C	97.7	100.4	97.5	103.6	103.6	96.6	98.1	101	101.2	100.5
P53350	Serine/threonine-protein kinase PLK1 [OS=Homo sapiens]	10	4	5	4	603	68.2	8.91	13.47	4	PLK1	107.2	103.1	114	77.6	78.3	110.7	120.1	111.7	83.9	93.4
P53365	Arfaptin-2 [OS=Homo sapiens]	17	4	5	4	341	37.8	6.04	11.99	4	ARFIP2	94.5	111.1	102.5	108.5	91.6	102.4	96.5	108.5	90	94.3
P53367	Arfaptin-1 [OS=Homo sapiens]	52	13	24	13	373	41.7	6.7	56.67	13	ARFIP1	94.8	88	100.2	97.6	107.2	100.3	102.7	100.2	106.5	102.6
P53384	Cytosolic Fe-S cluster assembly factor NUBP1 [OS=Homo sapiens]	19	5	13	5	320	34.5	5.33	42.16	5	NUBP1	93	107.6	96.9	100.7	103.1	106	96.9	103	98.7	94
P53396	ATP-citrate synthase [OS=Homo sapiens]	47	48	243	48	1101	120.8	7.33	530.52	48	ACLY	94.2	91.3	93.9	105.4	105.8	98.6	99.9	101.1	105.8	104
P53567	CCAAT/enhancer-binding protein gamma [OS=Homo sapiens]	5	1	1	1	150	16.4	9.77	1.8	1	CEBPG	130.3	102.1	103.8	71.4	61.6	133.4	115.2	86.4	108.8	87
P53582	Methionine aminopeptidase 1 [OS=Homo sapiens]	28	8	23	8	386	43.2	7.17	54.97	8	METAP1	94.9	100.4	91.7	101.4	86	112.3	99.4	110.1	99.8	104
P53597	Succinate--CoA ligase [ADP/GDP-forming] subunit alpha, mitochondrial [OS=Homo sapiens]	32	9	30	9	346	36.2	8.79	76.36	9	SUCLG1	98.4	99.8	100.8	96.3	90.5	103.7	100.9	101.4	106.4	101.9
P53602	Diphosphomevalonate decarboxylase [OS=Homo sapiens]	19	5	7	5	400	43.4	7.23	15.32	5	MVD	94.1	89.9	72.5	90.7	96.3	98.1	108.4	108.9	120.9	120.2
P53609	Geranylgeranyl transferase type-1 subunit beta [OS=Homo sapiens]	2	1	1	1	377	42.3	6.83	0	1	PGGT1B	128.6	83.7	135.7	109.2	102.1	87.2	82.7	79.6	82.3	109
P53611	Geranylgeranyl transferase type-2 subunit beta [OS=Homo sapiens]	7	2	7	2	331	36.9	5.03	14.54	2	RABGGTB	103.6	104	108.3	99.5	108.2	99.7	100.3	92.4	90	94
P53618	Coatomer subunit beta [OS=Homo sapiens]	40	33	134	33	953	107.1	6.05	327.41	33	COPB1	96.3	97.3	102.7	109	107.6	96	98.4	99	97.8	95.9
P53621	Coatomer subunit alpha [OS=Homo sapiens]	38	41	132	41	1224	138.3	7.66	318.75	41	COPA	93.3	91.9	96.4	108.5	103.2	100.4	99.5	102.4	99.7	104.7
P53634	Dipeptidyl peptidase 1 [OS=Homo sapiens]	14	7	18	7	463	51.8	6.99	61.08	7	CTSC	115.5	114	125.1	104.4	94.8	88.3	91.9	82.4	89.3	94.4
P53667	LIM domain kinase 1 [OS=Homo sapiens]	4	2	3	2	647	72.5	6.98	10.14	2	LIMK1	82.2	104.6	101.5	86.5	103	103.3	96.8	100.9	103	118.1
P53680	AP-2 complex subunit sigma [OS=Homo sapiens]	20	3	9	3	142	17	6.18	18.17	3	AP2S1	115.4	96.2	104.3	98.3	104.9	94.9	98.6	96.7	100.4	90.3
P53701	Holocytochrome c-type synthase [OS=Homo sapiens]	27	7	16	7	268	30.6	6.68	37.59	7	HCCS	122.9	108.1	107.6	92.2	95.6	96	94.9	95.3	91.3	96.1
P53778	Mitogen-activated protein kinase 12 [OS=Homo sapiens]	4	2	4	1	367	41.9	6.39	1.89	2	MAPK12	94.1	93.6	107.7	112.2	105.9	102.8	112.7	92.8	93.4	84.9
P53801	Pituitary tumor-transforming gene 1 protein-interacting protein [OS=Homo sapiens]	18	3	15	3	180	20.3	8.79	42.86	3	PTTG1IP	112.9	110.5	113	123.5	127.1	77.9	75.6	75.1	86.4	98
P53803	DNA-directed RNA polymerases I, II, and III subunit RPABC4 [OS=Homo sapiens]	14	1	1	1	58	7	9.06	2.37	1	POLR2K	137	104.9	107	87.3	99.2	87.6	104.4	88.8	90.1	93.6
P53814	Smoothelin [OS=Homo sapiens]	32	23	33	23	917	99	9.07	69.95	23	SMTN	110.5	113.2	109.8	90	93.1	99.1	105.5	104.9	90.9	83
P53990	IST1 homolog [OS=Homo sapiens]	21	7	11	7	364	39.7	5.35	21.76	7	IST1	90.1	86.6	83.3	89.2	85.5	112.5	105.8	117.1	116.1	113.8
P53992	Protein transport protein Sec24C [OS=Homo sapiens]	27	22	75	21	1094	118.2	7.06	204	22	SEC24C	94.8	96.3	96.9	102.8	101.6	100.4	99.6	101.4	102.2	104.1
P53999	Activated RNA polymerase II transcriptional coactivator p15 [OS=Homo sapiens]	46	7	25	7	127	14.4	9.6	54.07	7	SUB1	92.8	102.4	100.4	100.2	99.6	98.7	104.7	97.9	104	99.4
P54098	DNA polymerase subunit gamma-1 [OS=Homo sapiens]	2	3	4	3	1239	139.5	6.9	2.55	3	POLG	110.8	74	109.6	100.8	86.4	97	119.7	92.9	101.1	107.7
P54105	Methylosome subunit pICln [OS=Homo sapiens]	49	7	36	7	237	26.2	4.11	82.78	7	CLNS1A	109.5	110.9	111.2	108.6	123.3	83.5	89.2	82.6	96	85.1
P54132	RecQ-like DNA helicase BLM [OS=Homo sapiens]	3	3	3	3	1417	158.9	7.49	5.99	3	BLM	100.7	90.3	89.2	114.9	99	134.8	93	106.7	79	92.3
P54136	Arginine--tRNA ligase, cytoplasmic [OS=Homo sapiens]	59	41	162	41	660	75.3	6.68	378.21	41	RARS1	98.2	95.8	95.7	104.6	105	99.8	100.2	100	98.8	101.9
P54252	Ataxin-3 [OS=Homo sapiens]	14	4	7	4	361	41.2	4.78	14.32	4	ATXN3	102.1	102.2	112.1	106.3	93.9	99.3	89.1	95.3	103	96.8
P54259	Atrophin-1 [OS=Homo sapiens]	7	7	7	7	1190	125.3	8.98	9.05	7	ATN1	102.6	103.4	97.1	99.2	91.6	98.4	96.7	98.1	109.1	103.8
P54277	PMS1 protein homolog 1 [OS=Homo sapiens]	1	1	1	1	932	105.8	6.67	2.51	1	PMS1	118.5	102.6	105.9	94.8	84.5	90	106.3	118.4	100	79.1
P54577	Tyrosine--tRNA ligase, cytoplasmic [OS=Homo sapiens]	56	32	133	32	528	59.1	7.05	259.36	32	YARS1	98.8	91.2	93.8	95.3	100.1	103.3	108.6	104.5	102.3	102
P54578	Ubiquitin carboxyl-terminal hydrolase 14 [OS=Homo sapiens]	41	16	43	16	494	56	5.3	93.4	16	USP14	110.5	104	103.6	109.9	100.7	94.8	100.2	94.5	91.5	90.2
P54619	5'-AMP-activated protein kinase subunit gamma-1 [OS=Homo sapiens]	11	4	5	4	331	37.6	6.92	5.38	4	PRKAG1	96.3	92.2	105.1	110.6	110.5	91.6	100.2	102.4	96.4	94.6
P54646	5'-AMP-activated protein kinase catalytic subunit alpha-2 [OS=Homo sapiens]	8	3	4	1	552	62.3	7.75	13.6	3	PRKAA2	115.1	90	112	110.6	69.8	104.5	115.3	89.4	90.2	103.2
P54652	Heat shock-related 70 kDa protein 2 [OS=Homo sapiens]	24	21	275	2	639	70	5.74	578.88	21	HSPA2	105.4	95.6	109.4	105.2	112.6	94.8	99.3	89.4	92.5	95.8
P54687	Branched-chain-amino-acid aminotransferase, cytosolic [OS=Homo sapiens]	36	10	28	10	386	42.9	5.3	72.67	10	BCAT1	104.1	93.3	101.4	95.2	99	101.6	108	102.4	97.8	97.1
P54709	Sodium/potassium-transporting ATPase subunit beta-3 [OS=Homo sapiens]	24	7	19	7	279	31.5	8.35	26.44	7	ATP1B3	98.5	99	96.7	104.9	89	104.6	104.6	99.8	100.8	102.1
P54725	UV excision repair protein RAD23 homolog A [OS=Homo sapiens]	22	6	10	3	363	39.6	4.58	21.07	6	RAD23A	99	88.4	111.3	102.5	106.2	98.4	100.8	101.8	100.2	91.3
P54727	UV excision repair protein RAD23 homolog B [OS=Homo sapiens]	30	10	35	7	409	43.1	4.84	94.21	10	RAD23B	97.9	99.7	105.3	107.5	104.1	98.8	96.1	97.3	96.6	96.6
P54819	Adenylate kinase 2, mitochondrial [OS=Homo sapiens]	58	15	60	15	239	26.5	7.81	124.76	15	AK2	103.6	96.2	98.7	96.9	96.5	100.3	101.2	101.1	104.3	101.2
P54886	Delta-1-pyrroline-5-carboxylate synthase [OS=Homo sapiens]	31	19	73	19	795	87.2	7.12	170.95	19	ALDH18A1	99.8	97.3	102.9	95.5	88.3	106.4	103.7	99.4	103.5	103.2
P54920	Alpha-soluble NSF attachment protein [OS=Homo sapiens]	57	13	42	13	295	33.2	5.36	104.58	13	NAPA	102.1	99.6	99.7	102.7	100.7	98.6	96.6	97.8	101.4	100.8
P55010	Eukaryotic translation initiation factor 5 [OS=Homo sapiens]	48	23	72	23	431	49.2	5.58	162.17	23	EIF5	94.3	97.6	95.9	92.2	95.7	107.5	109.9	106.9	98.7	101.3
P55011	Solute carrier family 12 member 2 [OS=Homo sapiens]	5	5	6	5	1212	131.4	6.4	11.92	5	SLC12A2	117.5	82.7	102	89.8	117.7	94	95.6	76	103.4	121.3
P55036	26S proteasome non-ATPase regulatory subunit 4 [OS=Homo sapiens]	50	18	104	18	377	40.7	4.79	349.17	18	PSMD4	98.2	98.8	95.1	101.6	108.9	97.4	94	96.7	104.2	105
P55039	Developmentally-regulated GTP-binding protein 2 [OS=Homo sapiens]	22	7	11	6	364	40.7	8.88	16.1	7	DRG2	100.3	99.1	94.7	104.5	108.2	96.1	103.7	100.1	94.7	98.6
P55060	Exportin-2 [OS=Homo sapiens]	26	31	123	31	971	110.3	5.77	276.28	31	CSE1L	107.3	102.1	105.4	100.3	104.9	96.1	100.5	96.8	93.9	92.8
P55072	Transitional endoplasmic reticulum ATPase [OS=Homo sapiens]	77	64	462	64	806	89.3	5.26	1187.44	64	VCP	92.5	96	93.6	109.5	109.8	98.6	95.2	98.4	104.4	101.9
P55081	Microfibrillar-associated protein 1 [OS=Homo sapiens]	34	11	16	11	439	51.9	4.98	40.66	11	MFAP1	86.4	103.1	91.1	103.3	83.4	117.2	105.4	106.7	113.4	90
P55084	Trifunctional enzyme subunit beta, mitochondrial [OS=Homo sapiens]	27	11	25	11	474	51.3	9.41	48.95	11	HADHB	105.1	98.4	106.5	94.7	92.3	101	102	99.5	103.7	96.7
P55145	Mesencephalic astrocyte-derived neurotrophic factor [OS=Homo sapiens]	38	9	47	9	182	20.7	8.69	110.06	9	MANF	104.2	105.5	108.6	99.5	107.6	92.9	92.1	89.6	104	96
P55196	Afadin [OS=Homo sapiens]	7	9	13	9	1824	206.7	6.47	27.01	9	AFDN	106.6	108	99.6	93.2	109.1	85.4	91.8	85	107.2	114.1
P55199	RNA polymerase II elongation factor ELL [OS=Homo sapiens]	14	8	10	8	621	68.2	9.33	23.71	8	ELL	112	92.1	98.6	102.4	93.3	103	104.6	103.2	96.3	94.6
P55201	Peregrin [OS=Homo sapiens]	3	3	3	3	1214	137.4	7.93	5.26	3	BRPF1	112	81.8	105.5	80.8	85.3	109.7	114.4	99.7	104.9	105.9
P55209	Nucleosome assembly protein 1-like 1 [OS=Homo sapiens]	38	14	177	12	391	45.3	4.46	539.18	14	NAP1L1	102.7	101.2	99.7	95.4	101.8	101.7	100.4	99.6	95.9	101.6
P55210	Caspase-7 [OS=Homo sapiens]	22	5	8	5	303	34.3	6.07	13.5	5	CASP7	101.1	90	91.5	103	104.3	106.5	98.1	98.6	103.4	103.5
P55212	Caspase-6 [OS=Homo sapiens]	20	4	10	3	293	33.3	6.93	25.66	4	CASP6	109.1	94.4	118.1	101.7	84.8	109.1	92.2	91.3	102.8	96.7
P55263	Adenosine kinase [OS=Homo sapiens]	35	9	35	9	362	40.5	6.7	96.15	9	ADK	100.1	95.8	95	102.2	104.7	99.7	101.1	101.2	101.3	99
P55265	Double-stranded RNA-specific adenosine deaminase [OS=Homo sapiens]	31	33	101	33	1226	136	8.65	234.25	33	ADAR	93.9	97.2	96.5	97.8	88	106.9	106.3	107.8	102	103.7
P55268	Laminin subunit beta-2 [OS=Homo sapiens]	11	14	17	14	1798	195.9	6.52	43.9	14	LAMB2	97.7	100.9	99.9	112.8	120.5	91.8	87.4	91.3	98.9	98.8
P55283	Cadherin-4 [OS=Homo sapiens]	6	5	5	5	916	100.2	4.82	9.88	5	CDH4	110	105.8	109	78.7	87.2	115.9	103.7	104.7	96.8	88.2
P55287	Cadherin-11 [OS=Homo sapiens]	6	4	4	4	796	87.9	4.91	10.24	4	CDH11	107.4	91.3	115.7	96.1	79.1	94	109.2	96.9	108.3	102
P55327	Tumor protein D52 [OS=Homo sapiens]	58	9	35	9	224	24.3	4.83	93.07	9	TPD52	104.3	99.7	101.3	110.3	121.9	92.2	93	85.3	96	96.1
P55735	Protein SEC13 homolog [OS=Homo sapiens]	36	10	31	10	322	35.5	5.48	78.5	10	SEC13	95.1	101.1	92.5	105.7	112.8	98.4	98.2	97.8	101.1	97.4
P55769	NHP2-like protein 1 [OS=Homo sapiens]	53	9	40	9	128	14.2	8.46	89.58	9	SNU13	99	110.8	101.8	97	88.9	106.2	103.7	100.9	95.2	96.5
P55786	Puromycin-sensitive aminopeptidase [OS=Homo sapiens]	40	34	124	34	919	103.2	5.72	256.48	34	NPEPPS	94.9	95.7	92.9	105.1	105	98.5	98.7	102	106.4	100.9
P55789	FAD-linked sulfhydryl oxidase ALR [OS=Homo sapiens]	18	2	3	2	205	23.4	7.62	13.13	2	GFER	100	114.5	121.5	98.1	115.2	77.4	103.5	93.1	93.9	82.7
P55795	Heterogeneous nuclear ribonucleoprotein H2 [OS=Homo sapiens]	37	14	98	8	449	49.2	6.3	302.16	14	HNRNPH2	99.5	93.8	97.1	103.4	101	98.3	96.2	101	101.3	108.4
P55809	Succinyl-CoA:3-ketoacid coenzyme A transferase 1, mitochondrial [OS=Homo sapiens]	22	7	8	7	520	56.1	7.46	16.94	7	OXCT1	103.8	101.5	103	91.4	77.7	108.5	105.6	105.2	95.3	108
P55854	Small ubiquitin-related modifier 3 [OS=Homo sapiens]	20	2	13	1	103	11.6	5.49	36.12	2	SUMO3	100.8	99.7	102.5	101.2	100.9	97.2	103.9	101.3	96.9	95.6
P55884	Eukaryotic translation initiation factor 3 subunit B [OS=Homo sapiens]	37	24	124	24	814	92.4	5	283.48	24	EIF3B	101.3	95.3	100	98.7	101.5	101.3	108.3	100.3	95.3	97.9
P55957	BH3-interacting domain death agonist [OS=Homo sapiens]	34	4	21	4	195	22	5.44	48.34	4	BID	97.5	95.6	98.9	98.2	101	99.4	101.6	98.5	112	97.3
P56134	ATP synthase subunit f, mitochondrial [OS=Homo sapiens]	14	1	2	1	94	10.9	9.67	5.84	1	ATP5MF	96	82.8	102.8	94.9	77.7	112.5	118	117.8	106	91.5
P56182	Ribosomal RNA processing protein 1 homolog A [OS=Homo sapiens]	26	9	19	9	461	52.8	9.33	42.71	9	RRP1	98.8	106.9	109.9	99.4	91.9	101.5	107.6	97.6	89.9	96.6
P56192	Methionine--tRNA ligase, cytoplasmic [OS=Homo sapiens]	36	30	101	30	900	101.1	6.16	198.44	30	MARS1	101.2	96	101.3	98	103	94.8	101.1	95.7	103.3	105.5
P56199	Integrin alpha-1 [OS=Homo sapiens]	1	1	1	1	1179	130.8	6.29	2.17	1	ITGA1	94.3	102.6	87.1	136.1	68.3	98.8	96.9	109.1	105.4	101.3
P56211	cAMP-regulated phosphoprotein 19 [OS=Homo sapiens]	35	3	13	2	112	12.3	9.09	25.16	3	ARPP19	84.7	88.2	120.4	111.8	99.8	90.7	112.3	114.2	81.2	96.7
P56270	Myc-associated zinc finger protein [OS=Homo sapiens]	6	4	11	3	477	48.6	8.95	8.49	4	MAZ	98.5	94	94.3	90.5	90.4	107.3	104.1	114.3	96.1	110.6
P56277	Cx9C motif-containing protein 4 [OS=Homo sapiens]	34	3	3	3	68	7.7	8.18	5.8	3	CMC4	97.2	115.3	88	99.1	89	101.5	113.6	113	102.1	81.1
P56385	ATP synthase subunit e, mitochondrial [OS=Homo sapiens]	52	3	19	3	69	7.9	9.35	47.38	3	ATP5ME	100.9	102.7	102.2	91.9	87.8	100.8	104.5	104.2	106.5	98.6
P56524	Histone deacetylase 4 [OS=Homo sapiens]	8	5	5	5	1084	119	6.96	11.6	5	HDAC4	89	94.8	85.6	93.5	95.4	102.4	101.1	115.2	100.3	122.8
P56537	Eukaryotic translation initiation factor 6 [OS=Homo sapiens]	60	11	89	11	245	26.6	4.68	300.35	11	EIF6	104.3	102	102.2	104.1	102.8	98.9	98.8	96.2	94.2	96.5
P56556	NADH dehydrogenase [ubiquinone] 1 alpha subcomplex subunit 6 [OS=Homo sapiens]	27	3	11	3	128	15.1	9.98	8.3	3	NDUFA6	87.2	107.4	116.4	94	85.7	105.8	101.5	99.2	99.6	103.3
P56589	Peroxisomal biogenesis factor 3 [OS=Homo sapiens]	12	3	5	3	373	42.1	8.15	11.72	3	PEX3	131.4	93.6	95.6	102.6	98.8	97.4	113.7	102.3	77.7	86.8
P56945	Breast cancer anti-estrogen resistance protein 1 [OS=Homo sapiens]	30	17	45	17	870	93.3	5.67	118.11	17	BCAR1	81.2	81.1	80.1	93.9	97.5	104.3	105.9	103.5	131.6	120.9
P56962	Syntaxin-17 [OS=Homo sapiens]	9	2	6	2	302	33.4	6.57	11.2	2	STX17	94.3	94.5	117.7	101.5	84.1	98.2	104.1	97.8	98.4	109.3
P57071	PR domain zinc finger protein 15 [OS=Homo sapiens]	1	1	1	1	1507	169.2	8.24	2.66	1	PRDM15	103.2	104.9	88.1	73.2	86.3	112.8	128.7	103.6	98.3	100.8
P57105	Synaptojanin-2-binding protein [OS=Homo sapiens]	37	3	8	3	145	15.9	6.3	23.16	3	SYNJ2BP	95.6	103.8	114.7	93.2	88.5	99.1	96.6	104.8	97.4	106.3
P57678	Gem-associated protein 4 [OS=Homo sapiens]	5	6	12	6	1058	120	6.04	23.71	6	GEMIN4	101.9	86.8	112.2	105.2	101.7	102	114.9	104.9	82.9	87.5
P57721	Poly(rC)-binding protein 3 [OS=Homo sapiens]	24	8	73	2	371	39.4	8.07	210.18	8	PCBP3	105.7	96.1	104	94.8	102.2	97.2	96.4	100	102.9	100.6
P57737	Coronin-7 [OS=Homo sapiens]	18	12	22	12	925	100.5	5.8	47.44	12	CORO7	99.1	107.7	96.4	103.1	106.7	100.3	92.9	95.2	98	100.6
P57740	Nuclear pore complex protein Nup107 [OS=Homo sapiens]	12	9	16	9	925	106.3	5.43	38.92	9	NUP107	98.8	103.9	102.2	99.3	84.1	109.1	103.5	101.8	99.5	97.8
P57764	Gasdermin-D [OS=Homo sapiens]	11	3	7	3	484	52.8	5.08	19.16	3	GSDMD	109.9	112	105.6	108.1	117.2	90.4	87.5	89.1	90.4	89.9
P57768	Sorting nexin-16 [OS=Homo sapiens]	24	5	8	5	344	39.1	4.65	25.78	5	SNX16	103.8	125.9	97.1	116.3	93.7	109.1	70.1	63.2	115.5	105.4
P57772	Selenocysteine-specific elongation factor [OS=Homo sapiens]	9	4	8	4	596	65.3	8.35	14.13	4	EEFSEC	100.2	102	98.9	96.7	92.9	103.7	101	102.9	98.1	103.4
P58335	Anthrax toxin receptor 2 [OS=Homo sapiens]	19	8	14	7	489	53.6	7.46	30.99	8	ANTXR2	115.4	94.8	105.1	111	106.6	86.3	113.7	85	82.7	99.5
P58546	Myotrophin [OS=Homo sapiens]	47	7	36	7	118	12.9	5.52	90.51	7	MTPN	93.3	89.4	98.1	106.7	100.2	102.8	108.6	102.6	101.5	96.8
P59780	AP-3 complex subunit sigma-2 [OS=Homo sapiens]	6	1	1	1	193	22	5.22	2.05	1	AP3S2	73.8	111.6	107	90.1	98.6	88.8	107.8	122.5	97.7	102.1
P59998	Actin-related protein 2/3 complex subunit 4 [OS=Homo sapiens]	30	5	26	5	168	19.7	8.43	81.72	5	ARPC4	99.9	97.4	91.4	103.6	101.2	103	97.9	100.1	104.8	100.9
P60033	CD81 antigen [OS=Homo sapiens]	28	4	15	4	236	25.8	5.29	48.08	4	CD81	105.7	87.3	102	98	110.9	94.2	95.2	94.9	99.2	112.6
P60059	Protein transport protein Sec61 subunit gamma [OS=Homo sapiens]	19	1	2	1	68	7.7	9.99	3.96	1	SEC61G	80.5	97.7	88.2	104.4	77	101.2	112.5	114.1	125.8	98.7
P60174	Triosephosphate isomerase [OS=Homo sapiens]	94	26	307	26	249	26.7	6.9	770.85	26	TPI1	97.9	100.2	97.3	102.6	107.3	97.4	93.7	98.5	104.1	100.9
P60228	Eukaryotic translation initiation factor 3 subunit E [OS=Homo sapiens]	23	10	39	10	445	52.2	6.04	94.25	10	EIF3E	101.8	99.3	104.4	98.3	103.6	99.3	105.2	98.1	95.4	94.6
P60468	Protein transport protein Sec61 subunit beta [OS=Homo sapiens]	29	3	12	3	96	10	11.56	21.45	3	SEC61B	105.9	99	93.8	103.3	89.1	96.4	102.4	102.6	105.9	101.6
P60484	Phosphatidylinositol 3,4,5-trisphosphate 3-phosphatase and dual-specificity protein phosphatase PTEN [OS=Homo sapiens]	7	2	3	2	403	47.1	6.37	6.16	2	PTEN	114.1	89.8	93.6	91.3	106.4	97.9	92	97.1	105.1	112.7
P60510	Serine/threonine-protein phosphatase 4 catalytic subunit [OS=Homo sapiens]	22	5	7	4	307	35.1	5.06	17.99	5	PPP4C	107.8	108.4	92.3	105.7	103.4	97.2	101.8	88	97.8	97.7
P60660	Myosin light polypeptide 6 [OS=Homo sapiens]	84	12	202	10	151	16.9	4.65	418.33	12	MYL6	96.7	100.1	95.9	100.6	107.6	97.5	98.3	97.7	108	97.7
P60709	Actin, cytoplasmic 1 [OS=Homo sapiens]	79	32	1192	12	375	41.7	5.48	3152.88	32	ACTB	98.9	102.2	97.8	97.7	100.8	101.4	96.8	100.1	103	101.3
P60842	Eukaryotic initiation factor 4A-I [OS=Homo sapiens]	57	26	254	13	406	46.1	5.48	542.32	26	EIF4A1	101.7	96.7	99.1	100.9	102.5	101	105.4	101.1	92.8	98.7
P60866	40S ribosomal protein S20 [OS=Homo sapiens]	54	8	65	8	119	13.4	9.94	132.01	8	RPS20	98.7	102.1	98.7	96	94.9	104.8	105	104.2	93.9	101.6
P60891	Ribose-phosphate pyrophosphokinase 1 [OS=Homo sapiens]	55	15	39	7	318	34.8	6.98	94.34	15	PRPS1	103.1	98.8	102.6	102.7	105.8	96.9	101.1	98	94.8	96.2
P60900	Proteasome subunit alpha type-6 [OS=Homo sapiens]	53	12	35	12	246	27.4	6.76	76.52	12	PSMA6	104.6	99.1	98.3	94.5	104.7	100.1	96.9	99.6	98.6	103.5
P60903	Protein S100-A10 [OS=Homo sapiens]	46	4	27	4	97	11.2	7.37	36.66	4	S100A10	104.5	95.1	101.6	97	101.5	92.7	95	107.6	99.1	106
P60953	Cell division control protein 42 homolog [OS=Homo sapiens]	44	10	59	9	191	21.2	6.55	125.43	10	CDC42	103	103.7	100.8	104.5	111.3	93.2	95.1	92.1	98.3	98
P60981	Destrin [OS=Homo sapiens]	75	16	73	14	165	18.5	7.85	142.67	16	DSTN	99.5	91.4	96	114.5	115	92.8	95.9	95.3	99.6	99.9
P60983	Glia maturation factor beta [OS=Homo sapiens]	27	5	9	5	142	16.7	5.29	18.01	5	GMFB	96.7	75.4	92.8	105.9	93.4	117.4	113	114.8	91.9	98.6
P61006	Ras-related protein Rab-8A [OS=Homo sapiens]	42	9	50	4	207	23.7	9.07	137.51	9	RAB8A	105.4	114	102.6	100	96	96.7	93.5	100.8	94.6	96.4
P61011	Signal recognition particle 54 kDa protein [OS=Homo sapiens]	35	14	51	14	504	55.7	8.75	118.68	14	SRP54	93.5	95.8	100.3	98.1	95.8	105.9	104	103.4	100.5	102.7
P61018	Ras-related protein Rab-4B [OS=Homo sapiens]	16	3	8	2	213	23.6	6.06	21.01	3	RAB4B	95.2	101.8	101.2	98.4	127.1	90.2	81.9	104.4	88.4	111.5
P61019	Ras-related protein Rab-2A [OS=Homo sapiens]	40	7	29	3	212	23.5	6.54	63.66	7	RAB2A	100	102	104	104.8	98.2	97	96.2	94.2	99.5	104
P61020	Ras-related protein Rab-5B [OS=Homo sapiens]	51	9	30	5	215	23.7	8.13	72.04	9	RAB5B	99.5	96.7	103.6	103.8	106.5	96.1	91.9	93.6	100.7	107.7
P61024	Cyclin-dependent kinases regulatory subunit 1 [OS=Homo sapiens]	41	5	19	4	79	9.7	8.94	41.98	5	CKS1B	101.1	106.2	106.1	87.2	96.5	98.9	106.9	103	95.2	99
P61026	Ras-related protein Rab-10 [OS=Homo sapiens]	33	7	40	4	200	22.5	8.38	93.42	7	RAB10	112.4	100.7	105.8	105.3	102	92.8	97.8	92.3	101.9	89
P61077	Ubiquitin-conjugating enzyme E2 D3 [OS=Homo sapiens]	20	2	15	2	147	16.7	7.8	46.42	2	UBE2D3	84	100	100.8	103.4	104.4	100.9	102.8	100.6	97.9	105.3
P61081	NEDD8-conjugating enzyme Ubc12 [OS=Homo sapiens]	58	13	55	13	183	20.9	7.69	97.03	13	UBE2M	101.9	110.2	101.6	106.2	108.5	95.5	93.6	96.6	92.4	93.5
P61086	Ubiquitin-conjugating enzyme E2 K [OS=Homo sapiens]	42	9	32	9	200	22.4	5.44	67.37	9	UBE2K	100.7	94.1	98	104.8	110.8	99	95.2	99.5	96.5	101.3
P61088	Ubiquitin-conjugating enzyme E2 N [OS=Homo sapiens]	64	10	71	10	152	17.1	6.57	161.92	10	UBE2N	105.3	96.9	99	103.8	107.3	94.1	101.6	97.4	97.5	97
P61106	Ras-related protein Rab-14 [OS=Homo sapiens]	57	10	54	9	215	23.9	6.21	139.12	10	RAB14	102.1	99.3	100.5	102.2	100	100.8	102.2	99	95.9	98
P61158	Actin-related protein 3 [OS=Homo sapiens]	50	18	114	18	418	47.3	5.88	282.14	18	ACTR3	95.7	99.2	97.1	102.6	105.2	98.6	97.8	99.6	103.6	100.7
P61160	Actin-related protein 2 [OS=Homo sapiens]	38	14	95	13	394	44.7	6.74	231.89	14	ACTR2	96.9	95.1	95.6	105.5	104.6	98.1	100.1	101.8	102.4	99.8
P61163	Alpha-centractin [OS=Homo sapiens]	38	15	77	9	376	42.6	6.64	177.04	15	ACTR1A	98.6	95.7	98.5	107.3	106.3	97.3	97.2	99.6	99.7	99.8
P61201	COP9 signalosome complex subunit 2 [OS=Homo sapiens]	28	12	38	12	443	51.6	5.53	79.47	12	COPS2	100	93.9	98.7	106.4	109.1	99.8	100.1	100.6	94.3	97.2
P61204	ADP-ribosylation factor 3 [OS=Homo sapiens]	32	5	13	3	181	20.6	7.43	24	5	ARF3	104.8	83.7	109.6	101.8	110.4	92.9	97.8	102	80.9	116
P61221	ATP-binding cassette sub-family E member 1 [OS=Homo sapiens]	44	28	111	28	599	67.3	8.34	234.77	28	ABCE1	99.3	99.5	97.2	97.1	96.6	103.8	107.6	102.5	99.6	96.8
P61224	Ras-related protein Rap-1b [OS=Homo sapiens]	66	11	36	3	184	20.8	5.78	81.63	11	RAP1B	109.9	95.9	101.3	97.6	105.7	95.8	96.2	92.1	100.3	105.3
P61225	Ras-related protein Rap-2b [OS=Homo sapiens]	29	3	6	1	183	20.5	4.81	15.65	3	RAP2B	118.1	94.3	118.4	86.9	118.5	87.7	91.2	90.1	91.2	103.6
P61244	Protein max [OS=Homo sapiens]	39	6	9	6	160	18.3	6.3	21.22	6	MAX	94.4	106	96.2	100.7	102	104.4	94.8	101.1	96.8	103.6
P61247	40S ribosomal protein S3a [OS=Homo sapiens]	66	23	184	23	264	29.9	9.73	344.2	23	RPS3A	97.4	102.2	101.6	96.2	94.2	103.3	106.3	103.1	96.7	98.9
P61254	60S ribosomal protein L26 [OS=Homo sapiens]	53	10	46	10	145	17.2	10.55	71.74	10	RPL26	101.1	105.7	106.6	96.1	89.7	99.6	106.1	98.4	101	95.7
P61289	Proteasome activator complex subunit 3 [OS=Homo sapiens]	51	15	58	15	254	29.5	5.95	134.98	15	PSME3	101.4	103.5	104.6	92.1	99.8	104	105.4	99	94.8	95.2
P61313	60S ribosomal protein L15 [OS=Homo sapiens]	44	10	49	10	204	24.1	11.62	67.97	10	RPL15	98.1	102.1	101.1	98.2	92.7	104.8	103.3	103.4	96.6	99.7
P61326	Protein mago nashi homolog [OS=Homo sapiens]	30	7	20	7	146	17.2	6.11	25.96	7	MAGOH	90.6	89.1	94	92.4	92.2	108.3	118.9	111.2	103.3	99.9
P61353	60S ribosomal protein L27 [OS=Homo sapiens]	55	9	90	8	136	15.8	10.56	108.12	9	RPL27	102.8	102.3	103.7	96.1	93.6	104.1	104.7	102.7	96	94.1
P61421	V-type proton ATPase subunit d 1 [OS=Homo sapiens]	14	4	7	4	351	40.3	5	17.24	4	ATP6V0D1	103	93.9	100.8	105.3	94.7	95.3	104.5	99.6	103.6	99.4
P61513	60S ribosomal protein L37a [OS=Homo sapiens]	59	6	41	6	92	10.3	10.43	92.29	6	RPL37A	100.7	103	103.4	97.1	90.9	104.4	106.7	103.8	94.4	95.6
P61586	Transforming protein RhoA [OS=Homo sapiens]	50	11	70	4	193	21.8	6.1	159.45	11	RHOA	105.7	97.1	101.1	93.2	108.9	99.6	96.5	95.4	99.3	103.2
P61604	10 kDa heat shock protein, mitochondrial [OS=Homo sapiens]	83	11	111	11	102	10.9	8.92	215.68	11	HSPE1	98.1	109.7	103.1	94.5	88.7	100.2	99.4	99.5	105.9	100.9
P61619	Protein transport protein Sec61 subunit alpha isoform 1 [OS=Homo sapiens]	9	4	4	4	476	52.2	8.06	0	4	SEC61A1	104.7	89.4	102.9	108.3	93.2	124.2	94.3	106.4	95.1	81.5
P61758	Prefoldin subunit 3 [OS=Homo sapiens]	65	17	44	16	197	22.6	7.11	67.39	17	VBP1	107	104.5	104.5	100.4	109.1	94.9	94.5	93.4	95.4	96.2
P61764	Syntaxin-binding protein 1 [OS=Homo sapiens]	10	6	9	6	594	67.5	6.96	22.52	6	STXBP1	105	93.7	112.5	110.7	108	98.2	88.1	96.6	93.1	94.1
P61769	Beta-2-microglobulin [OS=Homo sapiens]	41	4	12	4	119	13.7	6.52	30.51	4	B2M	88.8	88.3	94.7	95.8	97.3	100.4	97.9	106.7	108.7	121.4
P61812	Transforming growth factor beta-2 proprotein [OS=Homo sapiens]	10	5	6	5	414	47.7	8.53	13.67	5	TGFB2	86.8	114.4	94.2	91.9	111.1	96.3	95.7	94.1	108.1	107.4
P61916	NPC intracellular cholesterol transporter 2 [OS=Homo sapiens]	52	9	21	9	151	16.6	7.65	48.49	9	NPC2	99.5	97	103	99	97.5	92.8	99.7	100.2	108.7	102.6
P61923	Coatomer subunit zeta-1 [OS=Homo sapiens]	29	6	26	6	177	20.2	4.81	55.69	6	COPZ1	97.6	97	98.5	108.4	109.2	97.1	93.5	96	100.7	101.9
P61927	60S ribosomal protein L37 [OS=Homo sapiens]	37	5	27	5	97	11.1	11.74	35.87	5	RPL37	103.6	108	103.5	94.8	90.7	102.5	105.9	100.4	97.1	93.3
P61956	Small ubiquitin-related modifier 2 [OS=Homo sapiens]	23	2	20	1	95	10.9	5.5	49.23	2	SUMO2	100	95	103.7	95.7	107.3	99	110.7	97.6	101	90
P61960	Ubiquitin-fold modifier 1 [OS=Homo sapiens]	68	3	10	3	85	9.1	9.31	28.98	3	UFM1	101.8	101.7	101.6	112.7	109.7	90	99.2	90.6	97.1	95.6
P61962	DDB1- and CUL4-associated factor 7 [OS=Homo sapiens]	19	5	9	5	342	38.9	5.52	10.05	5	DCAF7	96.5	99.6	104.1	94.2	105.2	105.9	105	112	86.6	90.8
P61964	WD repeat-containing protein 5 [OS=Homo sapiens]	39	10	30	10	334	36.6	8.27	66.2	10	WDR5	96.3	102.4	99.7	93.6	97.3	100.7	101.6	104.6	100	103.8
P61966	AP-1 complex subunit sigma-1A [OS=Homo sapiens]	16	3	8	3	158	18.7	5.73	19.94	3	AP1S1	82.7	76.5	85.5	98.6	81.4	116.5	112.1	114.9	115.7	116.3
P61970	Nuclear transport factor 2 [OS=Homo sapiens]	30	3	22	3	127	14.5	5.38	58.06	3	NUTF2	79.9	84.3	83.1	87.9	90.4	113.1	113	115.3	118.5	114.6
P61978	Heterogeneous nuclear ribonucleoprotein K [OS=Homo sapiens]	61	31	219	31	463	50.9	5.54	558.77	31	HNRNPK	97.6	98.8	97.8	97.2	92.3	104.8	102.7	105.1	102.4	101.3
P61981	14-3-3 protein gamma [OS=Homo sapiens]	67	20	164	13	247	28.3	4.89	323.51	20	YWHAG	94.5	94.5	97.4	104.9	110.6	96.4	100.5	98.8	100.8	101.5
P62070	Ras-related protein R-Ras2 [OS=Homo sapiens]	32	5	6	3	204	23.4	6.01	8.25	5	RRAS2	112.2	105.3	109.2	103.2	107.3	97	88.3	81.8	95.6	100.2
P62072	Mitochondrial import inner membrane translocase subunit Tim10 [OS=Homo sapiens]	34	3	8	3	90	10.3	6.29	16.45	3	TIMM10	103.9	117	111.5	104.7	86.6	96.5	98	93.4	99.5	89
P62081	40S ribosomal protein S7 [OS=Homo sapiens]	40	10	40	10	194	22.1	10.1	81.2	10	RPS7	104.5	102.2	101.3	93.6	89	105.1	108.4	103.8	96.4	95.7
P62136	Serine/threonine-protein phosphatase PP1-alpha catalytic subunit [OS=Homo sapiens]	42	11	75	4	330	37.5	6.33	173.55	11	PPP1CA	99.6	89.8	99.7	104.7	97.4	103	107.6	106.4	94.8	97.1
P62140	Serine/threonine-protein phosphatase PP1-beta catalytic subunit [OS=Homo sapiens]	36	9	73	2	327	37.2	6.19	183.04	9	PPP1CB	97.8	99.9	103.6	101	114	99	97.3	91.1	101.8	94.5
P62191	26S proteasome regulatory subunit 4 [OS=Homo sapiens]	63	30	124	28	440	49.2	6.21	279.59	30	PSMC1	97.9	95.8	96.8	105.1	106.4	100.6	101.4	98.3	98.6	99.1
P62195	26S proteasome regulatory subunit 8 [OS=Homo sapiens]	60	20	88	18	406	45.6	7.55	179.23	20	PSMC5	94.1	91.6	96.8	103.9	111.4	99.3	100	98.4	100.6	104
P62241	40S ribosomal protein S8 [OS=Homo sapiens]	62	15	115	15	208	24.2	10.32	206.94	15	RPS8	99.9	98.2	101.3	94.2	92	104.9	106.2	102.3	98.8	102.3
P62244	40S ribosomal protein S15a [OS=Homo sapiens]	71	10	43	10	130	14.8	10.13	85.62	10	RPS15A	106	99.3	100	97.5	90.8	105.7	105.7	103.1	98.5	93.6
P62249	40S ribosomal protein S16 [OS=Homo sapiens]	77	16	95	16	146	16.4	10.21	117.01	16	RPS16	103.7	97.6	99.8	97.6	90.4	104.9	110.4	103.5	95.4	96.6
P62253	Ubiquitin-conjugating enzyme E2 G1 [OS=Homo sapiens]	9	2	2	2	170	19.5	5.3	2.4	2	UBE2G1	117.2	84	102.8	115.4	109.8	86.5	109.2	96.7	86.9	91.5
P62258	14-3-3 protein epsilon [OS=Homo sapiens]	75	22	230	19	255	29.2	4.74	568.78	22	YWHAE	100.9	92	100	101.7	105.5	95.6	100.5	98.8	101.6	103.3
P62263	40S ribosomal protein S14 [OS=Homo sapiens]	43	10	106	10	151	16.3	10.05	259.21	10	RPS14	101.9	101	101.6	96.7	96.3	103.4	105.9	104.3	92.5	96.4
P62266	40S ribosomal protein S23 [OS=Homo sapiens]	54	8	84	8	143	15.8	10.49	177.32	8	RPS23	97.3	105.4	99.1	94.5	92.4	106.8	103.8	104	98.4	98.3
P62269	40S ribosomal protein S18 [OS=Homo sapiens]	47	12	77	12	152	17.7	10.99	152.65	12	RPS18	103.5	96.6	102.1	96.4	92.4	104.4	105.6	103.8	96.2	99.1
P62273	40S ribosomal protein S29 [OS=Homo sapiens]	14	2	9	2	56	6.7	10.13	7.4	2	RPS29	104.8	108.9	103.5	98	90.1	100.8	104.9	102.7	97.7	88.4
P62277	40S ribosomal protein S13 [OS=Homo sapiens]	57	12	54	12	151	17.2	10.54	75.73	12	RPS13	101.2	100.2	99.7	96.7	93.5	104.4	105.4	104.2	97.7	97
P62280	40S ribosomal protein S11 [OS=Homo sapiens]	54	14	95	14	158	18.4	10.3	125.14	14	RPS11	100.4	99	100.2	96.4	91.1	106.6	108.2	104.4	95.6	98.1
P62304	Small nuclear ribonucleoprotein E [OS=Homo sapiens]	29	3	14	3	92	10.8	9.44	24.13	3	SNRPE	103.2	107.5	103.7	94.4	91.2	103.4	99.2	98.3	97.7	101.3
P62306	Small nuclear ribonucleoprotein F [OS=Homo sapiens]	24	2	19	2	86	9.7	4.67	38.51	2	SNRPF	123.5	117.9	103.1	84.4	94.5	87.8	94	89.5	94.4	111
P62308	Small nuclear ribonucleoprotein G [OS=Homo sapiens]	26	2	8	2	76	8.5	8.88	18.54	2	SNRPG	104.2	112.3	96.6	95.5	93	105.6	97.7	102.4	94.3	98.3
P62310	U6 snRNA-associated Sm-like protein LSm3 [OS=Homo sapiens]	22	3	6	3	102	11.8	4.7	11.5	3	LSM3	97.5	96.2	107.9	95.7	103.8	98.8	98.3	96.3	104.6	100.9
P62312	U6 snRNA-associated Sm-like protein LSm6 [OS=Homo sapiens]	15	2	7	2	80	9.1	9.58	9.84	2	LSM6	96.5	98.1	100.4	95	99.1	97.8	98.4	103.1	103.6	108
P62314	Small nuclear ribonucleoprotein Sm D1 [OS=Homo sapiens]	20	2	13	2	119	13.3	11.56	27.39	2	SNRPD1	100.2	91.4	99.5	97	92.6	98.5	104.1	98.7	100.3	117.7
P62316	Small nuclear ribonucleoprotein Sm D2 [OS=Homo sapiens]	62	9	77	9	118	13.5	9.91	213.52	9	SNRPD2	102.4	103.7	101.2	97.1	94.3	99.9	101.1	102	95.5	102.9
P62318	Small nuclear ribonucleoprotein Sm D3 [OS=Homo sapiens]	59	6	34	6	126	13.9	10.32	72.51	6	SNRPD3	100.3	95.9	102.5	90.2	91.7	102.6	101.4	102	103.9	109.5
P62328	Thymosin beta-4 [OS=Homo sapiens]	57	9	86	6	44	5.1	5.06	64.24	9	TMSB4X	98.9	93.1	98.8	110.3	104.2	95.4	101.1	102.9	98.3	97
P62330	ADP-ribosylation factor 6 [OS=Homo sapiens]	24	3	11	3	175	20.1	8.95	23.43	3	ARF6	109.4	89	107.5	100.7	117.4	88.3	92.9	106.1	80.9	107.9
P62333	26S proteasome regulatory subunit 10B [OS=Homo sapiens]	59	21	99	21	389	44.1	7.49	235.67	21	PSMC6	95.9	94.4	94.6	106.3	110	101	99.4	98.9	98	101.5
P62424	60S ribosomal protein L7a [OS=Homo sapiens]	57	22	147	22	266	30	10.61	320.14	22	RPL7A	100	101.7	100.7	95.5	92.6	104.7	104	102.8	99.5	98.5
P62495	Eukaryotic peptide chain release factor subunit 1 [OS=Homo sapiens]	37	15	59	15	437	49	5.71	132.78	15	ETF1	102.8	93.9	100.4	100.8	98.7	99	104.3	101.5	98.3	100.3
P62633	CCHC-type zinc finger nucleic acid binding protein [OS=Homo sapiens]	63	10	72	10	177	19.5	7.71	158.37	10	CNBP	94.9	106.6	103.1	98.4	100.5	99.9	102.5	98.1	100.4	95.6
P62699	Protein yippee-like 5 [OS=Homo sapiens]	12	1	2	1	121	13.8	7.31	4.27	1	YPEL5	96.3	92.8	79.8	108.4	106.1	100.6	96.9	112.3	97.6	109.1
P62701	40S ribosomal protein S4, X isoform [OS=Homo sapiens]	73	23	169	23	263	29.6	10.15	311.63	23	RPS4X	103.5	97.6	101.5	97.7	93.3	103.6	106.5	104.2	92.2	99.9
P62714	Serine/threonine-protein phosphatase 2A catalytic subunit beta isoform [OS=Homo sapiens]	38	9	50	2	309	35.6	5.43	144.18	9	PPP2CB	88	88.6	88.5	95.4	92.6	93.9	90.7	94.2	92.6	175.5
P62750	60S ribosomal protein L23a [OS=Homo sapiens]	53	13	103	13	156	17.7	10.45	186.99	13	RPL23A	99.6	106.3	103.4	96.6	92	105.2	101.4	101.9	96.8	96.6
P62753	40S ribosomal protein S6 [OS=Homo sapiens]	55	22	102	22	249	28.7	10.84	185.73	22	RPS6	102.2	100	101.7	94.6	96.1	102.4	106.7	102.2	97.4	96.6
P62805	Histone H4 [OS=Homo sapiens]	61	11	157	11	103	11.4	11.36	281.15	11	H4C1; H4C11; H4C12; H4C13; H4C14; H4C15; H4C16; H4C2; H4C3; H4C4; H4C5; H4C6; H4C8; H4C9	210.1	94.4	108.9	55.8	147.9	58.3	66.2	63.2	66.6	128.6
P62820	Ras-related protein Rab-1A [OS=Homo sapiens]	66	15	95	6	205	22.7	6.21	236.5	15	RAB1A	94.4	102.7	102.7	101.9	98.7	99.5	97.9	98.2	101.9	102.1
P62826	GTP-binding nuclear protein Ran [OS=Homo sapiens]	44	11	85	11	216	24.4	7.49	184.47	11	RAN	102	98.2	101.8	103.1	103.6	98.4	103.6	98.5	96.3	94.4
P62829	60S ribosomal protein L23 [OS=Homo sapiens]	80	12	114	12	140	14.9	10.51	311.84	12	RPL23	100.4	102.1	102.4	94.7	93	103.9	104.6	102.2	99.4	97.4
P62834	Ras-related protein Rap-1A [OS=Homo sapiens]	52	10	27	2	184	21	6.67	48.24	10	RAP1A	115.9	107.6	100.8	101.4	98.6	98	89.1	92.1	92.4	104.1
P62841	40S ribosomal protein S15 [OS=Homo sapiens]	22	3	29	3	145	17	10.39	61.7	3	RPS15	100.7	99.7	101.8	97.7	95.6	105	100.7	102.4	97.4	98.9
P62847	40S ribosomal protein S24 [OS=Homo sapiens]	35	5	74	5	133	15.4	10.78	163.43	5	RPS24	98.5	97.9	100.9	96.3	94.9	104.4	106.1	103.5	97.3	100.2
P62851	40S ribosomal protein S25 [OS=Homo sapiens]	42	8	63	8	125	13.7	10.11	126.58	8	RPS25	103.3	104	102.2	95.7	93.2	104.7	104	102.8	94.8	95.2
P62854	40S ribosomal protein S26 [OS=Homo sapiens]	43	6	29	6	115	13	11	73.05	6	RPS26	93.1	86.4	94.3	96	90.5	108.7	116.8	109.5	96.9	107.9
P62857	40S ribosomal protein S28 [OS=Homo sapiens]	52	5	78	5	69	7.8	10.7	158.08	5	RPS28	100.4	108.8	105.3	98.1	94	101.2	101.4	97.3	97.2	96.3
P62861	FAU ubiquitin-like and ribosomal protein S30 [OS=Homo sapiens]	14	4	24	4	133	14.4	10.17	23.76	4	FAU	99.2	105.2	98.6	94.6	91	105.2	103.6	103.7	99.1	99.8
P62873	Guanine nucleotide-binding protein G(I)/G(S)/G(T) subunit beta-1 [OS=Homo sapiens]	31	9	34	5	340	37.4	6	100.19	9	GNB1	122.8	101.3	115.3	100.8	119.7	85.3	84.2	79.1	90.7	100.7
P62875	DNA-directed RNA polymerases I, II, and III subunit RPABC5 [OS=Homo sapiens]	13	1	4	1	67	7.6	7.77	10.37	1	POLR2L	92.8	108.7	101	94.3	82.1	116.2	105.6	107.5	98.3	93.4
P62877	E3 ubiquitin-protein ligase RBX1 [OS=Homo sapiens]	13	2	5	2	108	12.3	6.96	8.32	2	RBX1	95.3	99.4	96.7	103.7	88.1	105.3	99.8	102.2	105.4	104.2
P62879	Guanine nucleotide-binding protein G(I)/G(S)/G(T) subunit beta-2 [OS=Homo sapiens]	29	8	35	3	340	37.3	6	107.96	8	GNB2	101.9	97.2	103.2	94.6	113	93.9	91.2	89.8	105.7	109.5
P62888	60S ribosomal protein L30 [OS=Homo sapiens]	53	8	64	8	115	12.8	9.63	133.89	8	RPL30	104.1	95	102.4	97.3	94.1	104	108.9	103.2	95.7	95.2
P62891	60S ribosomal protein L39 [OS=Homo sapiens]	20	1	5	1	51	6.4	12.56	0	1	RPL39	95	95.6	100.8	100	93.8	93.9	102.7	105.4	102.6	110.1
P62899	60S ribosomal protein L31 [OS=Homo sapiens]	54	11	100	11	125	14.5	10.54	200.43	11	RPL31	103.3	101.3	103.3	95.6	95.4	103.4	106.3	102.5	93.2	95.7
P62906	60S ribosomal protein L10a [OS=Homo sapiens]	46	11	120	11	217	24.8	9.94	263.38	11	RPL10A	97	103.4	101.2	95.7	92.2	105	104.7	103.6	99.9	97.4
P62910	60S ribosomal protein L32 [OS=Homo sapiens]	40	7	89	7	135	15.9	11.33	164.98	7	RPL32	99.3	97.5	101.7	97.8	96.9	102.5	108.7	104.1	92.2	99.4
P62913	60S ribosomal protein L11 [OS=Homo sapiens]	35	9	56	9	178	20.2	9.6	94.07	9	RPL11	101.5	103.8	100.6	96.6	92.2	105.8	104.9	103.3	96.2	95.2
P62917	60S ribosomal protein L8 [OS=Homo sapiens]	59	17	84	17	257	28	11.03	156.01	17	RPL8	99.2	106.2	102.5	95.2	94.7	104	104.6	99.6	97.4	96.6
P62937	Peptidyl-prolyl cis-trans isomerase A [OS=Homo sapiens]	87	17	361	15	165	18	7.81	680.72	17	PPIA	92.7	97.7	92.3	96.9	98	104.1	99.4	103.9	108.1	106.9
P62942	Peptidyl-prolyl cis-trans isomerase FKBP1A [OS=Homo sapiens]	33	3	15	3	108	11.9	8.16	35.28	3	FKBP1A	89	91.1	97.3	105.7	112.6	105.5	101.3	100.2	100	97.4
P62979	Ubiquitin-40S ribosomal protein S27a [OS=Homo sapiens]	67	13	151	6	156	18	9.64	279.48	13	RPS27A	92.6	95.7	97.8	104	109.9	102.3	94	97	95.9	110.8
P62987	Ubiquitin-60S ribosomal protein L40 [OS=Homo sapiens]	51	8	117	1	128	14.7	9.83	147.96	8	UBA52	98	102.8	102.2	101.1	95.8	102.4	102.1	101.9	94.6	99.2
P62993	Growth factor receptor-bound protein 2 [OS=Homo sapiens]	59	11	32	11	217	25.2	6.32	68.79	11	GRB2	101	103.4	103.7	101	102.9	98.5	98.3	100.2	94.7	96.4
P62995	Transformer-2 protein homolog beta [OS=Homo sapiens]	33	11	46	9	288	33.6	11.25	77.17	11	TRA2B	100.1	95.9	94.6	93.4	85.8	106	107.4	105.3	103.6	108
P63000	Ras-related C3 botulinum toxin substrate 1 [OS=Homo sapiens]	45	11	75	6	192	21.4	8.5	142.52	11	RAC1	101.2	100.4	98.2	106.7	104.9	100.6	96.9	97.7	97.9	95.6
P63010	AP-2 complex subunit beta [OS=Homo sapiens]	29	29	75	15	937	104.5	5.38	163.28	29	AP2B1	104.6	99.3	102.9	97.9	102.9	97.6	99	101.7	95.3	98.8
P63027	Vesicle-associated membrane protein 2 [OS=Homo sapiens]	34	3	9	1	116	12.7	8.13	32.21	3	VAMP2	112.4	111.9	111.8	100.6	107.5	89.1	88.3	83	90.9	104.5
P63092	Guanine nucleotide-binding protein G(s) subunit alpha isoforms short [OS=Homo sapiens]	31	11	36	10	394	45.6	5.82	92.89	11	GNAS	121.2	97.9	103.5	89.8	106.5	93.1	91.8	87.4	102.1	106.7
P63104	14-3-3 protein zeta/delta [OS=Homo sapiens]	63	20	320	14	245	27.7	4.79	781.01	20	YWHAZ	96.2	95.9	93.8	101.3	104.8	100	97.2	101.4	105.8	103.7
P63151	Serine/threonine-protein phosphatase 2A 55 kDa regulatory subunit B alpha isoform [OS=Homo sapiens]	34	13	34	7	447	51.7	6.2	93.2	13	PPP2R2A	102.5	94	100.7	103.9	105	98.9	102.1	99	98	95.8
P63165	Small ubiquitin-related modifier 1 [OS=Homo sapiens]	42	5	19	5	101	11.6	5.52	27.12	5	SUMO1	95.6	107.8	104.6	104.1	94	101.9	99.3	97	102.2	93.5
[truncated: 3,814 more rows]
