# Supplementary material for: Exploiting the DCAF16–SPIN4 interaction to identify DCAF16 ligands for PROTAC development
Source: Royal Society of Chemistry journal article supplement (doi:10.1039/d4md00681j), 2024-12-06
Supplement: d4md00681j5.xlsx [file d4md00681j5.xlsx]

## Sheet: Summary
TMT tag	Sample
Abundances (Grouped): F1, 126	HEK293T expressing FLAG-FKBP12_NLS and HA-DCAF16, 5 µM MG132, 2 hours
Abundances (Grouped): F1, 127N	HEK293T expressing FLAG-FKBP12_NLS and HA-DCAF16, 5 µM MG132, 2 hours
Abundances (Grouped): F1, 127C	HEK293T expressing FLAG-FKBP12_NLS and HA-DCAF16, 5 µM KB02-SLF and 5 µM MG132, 2 hours
Abundances (Grouped): F1, 128N	HEK293T expressing FLAG-FKBP12_NLS and HA-DCAF16, 5 µM KB02-SLF and 5 µM MG132, 2 hours
Abundances (Grouped): F1, 128C	Not used in the study
Abundances (Grouped): F1, 129N
Abundances (Grouped): F1, 129C
Abundances (Grouped): F1, 130N	HEK293T expressing FLAG-FKBP12_NLS and HA-DCAF16, 5 µM 2G07-SLF and 5 µM MG132, 2 hours
Abundances (Grouped): F1, 130C	HEK293T expressing FLAG-FKBP12_NLS and HA-DCAF16, 5 µM 2G07-SLF and 5 µM MG132, 2 hours
Abundances (Grouped): F1, 131	HEK293T expressing FLAG-FKBP12_NLS and HA-DCAF16, 5 µM 2G07-SLF and 5 µM MG132, 2 hours

## Sheet: FKBP12_NLS interactome
Accession	Description	Coverage [%]	# Peptides	# PSMs	# Unique Peptides	# AAs	MW [kDa]	calc. pI	Score Sequest HT: Sequest HT	# Peptides (by Search Engine): Sequest HT	Gene Symbol	Abundances (Grouped): F1, 126	Abundances (Grouped): F1, 127N	Abundances (Grouped): F1, 127C	Abundances (Grouped): F1, 128N	Abundances (Grouped): F1, 128C	Abundances (Grouped): F1, 129N	Abundances (Grouped): F1, 129C	Abundances (Grouped): F1, 130N	Abundances (Grouped): F1, 130C	Abundances (Grouped): F1, 131
P33176	Kinesin-1 heavy chain [OS=Homo sapiens]	3	2	3	2	963	109.6	6.51	10.76	2	KIF5B	56.3	39.6	86.2	89.6	69.7	89.7	89.9	149.9	164.5	164.6
Q32MZ4	Leucine-rich repeat flightless-interacting protein 1 [OS=Homo sapiens]	3	2	2	2	808	89.2	4.65	6.77	2	LRRFIP1	66.2	62.1	75.7	70.8	76.3	75.7	71.2	160.3	165.1	176.5
O43719	HIV Tat-specific factor 1 [OS=Homo sapiens]	3	2	2	2	755	85.8	4.4	4.93	2	HTATSF1	50.8	42.4	123.8	143.7	91	100.8	92.1	107.4	129.9	118.2
Q15654	Thyroid receptor-interacting protein 6 [OS=Homo sapiens]	8	2	2	2	476	50.3	7.37	7.71	2	TRIP6	49.7	67.6	101.4	89.9	84.8	72.7	88.2	148.3	143.5	153.9
O60343	TBC1 domain family member 4 [OS=Homo sapiens]	2	2	2	2	1298	146.5	7.01	6.33	2	TBC1D4	36.2	52	141.8	128.3	97.9	118.2	93.7	115.5	112.1	104.3
P67870	Casein kinase II subunit beta [OS=Homo sapiens]	9	2	2	2	215	24.9	5.55	5.46	2	CSNK2B	61.9	61.5	124.7	134.1	84.6	79.5	79.4	130.7	112.9	130.9
Q7Z7A3	Cytoplasmic tRNA 2-thiolation protein 1 [OS=Homo sapiens]	12	2	2	2	348	36.4	9.2	7.41	2	CTU1	73.2	56	127.9	106.8	96.7	88.7	89.9	120.2	120.9	119.8
P31321	cAMP-dependent protein kinase type I-beta regulatory subunit [OS=Homo sapiens]	7	2	2	1	381	43	5.71	5.03	2	PRKAR1B	83	49.9	128.5	119.9	100	91.1	86.8	126	101	113.8
P55209	Nucleosome assembly protein 1-like 1 [OS=Homo sapiens]	5	2	2	2	391	45.3	4.46	5.35	2	NAP1L1	74.9	72.6	110.2	84.3	104.7	95	93	120.3	124.7	120.2
P35659	Protein DEK [OS=Homo sapiens]	5	2	2	2	375	42.6	8.56	4.65	2	DEK	67.4	71	133	149.4	86.4	88.2	78	109.6	112.3	104.6
Q96BK5	PIN2/TERF1-interacting telomerase inhibitor 1 [OS=Homo sapiens]	8	2	2	2	328	37	9.6	6.83	2	PINX1	61.6	79.9	149.6	121.4	76.7	84.7	94.1	115.6	104.9	111.6
Q9ULA0	Aspartyl aminopeptidase [OS=Homo sapiens]	5	2	2	2	485	53.4	7.58	3.93	2	DNPEP	64.1	64	117.8	112.9	115	114.4	111.3	98.1	96.9	105.4
P56537	Eukaryotic translation initiation factor 6 [OS=Homo sapiens]	10	2	2	2	245	26.6	4.68	5.72	2	EIF6	84	70.7	102.1	86.1	94.7	73.6	127.2	132	130.5	99.2
Q15024	Exosome complex component RRP42 [OS=Homo sapiens]	7	2	2	2	291	31.8	5.19	4.09	2	EXOSC7	94	63.2	93.8	90.2	116.1	65.6	125.9	100.8	115.1	135.3
P25786	Proteasome subunit alpha type-1 [OS=Homo sapiens]	8	2	2	2	263	29.5	6.61	4.9	2	PSMA1	84.7	66.3	120.7	114.3	94.2	92.7	92.7	106.2	118.9	109.4
Q15370	Elongin-B [OS=Homo sapiens]	27	2	2	2	118	13.1	4.88	7.06	2	ELOB	83.8	81	109.7	107.4	101.9	92.7	80.4	113.3	118.6	111
Q6DKI1	60S ribosomal protein L7-like 1 [OS=Homo sapiens]	10	2	2	2	255	29.7	10.52	7.2	2	RPL7L1	77.3	100.8	93.6	78.1	109.3	86.9	98.7	120.1	107.3	127.9
O60341	Lysine-specific histone demethylase 1A [OS=Homo sapiens]	3	2	2	2	852	92.8	6.52	6.17	2	KDM1A	77.4	79.5	119.5	109.2	96.2	104.5	102	99.6	95.7	116.3
Q92552	28S ribosomal protein S27, mitochondrial [OS=Homo sapiens]	4	2	2	2	414	47.6	6.18	4.46	2	MRPS27	84.3	63.2	132.4	171	97	95.1	76.4	86.9	69.5	124.3
Q96GQ7	Probable ATP-dependent RNA helicase DDX27 [OS=Homo sapiens]	3	2	2	2	796	89.8	9.28	5.23	2	DDX27	82	100.9	100.4	107.2	82.2	98	91.9	105	103.1	129.3
Q9Y265	RuvB-like 1 [OS=Homo sapiens]	6	2	2	2	456	50.2	6.42	5.04	2	RUVBL1	95.9	87.6	116.2	102.2	97.7	85	89.4	100.6	111.4	113.9
P10809	60 kDa heat shock protein, mitochondrial [OS=Homo sapiens]	3	2	2	2	573	61	5.87	4.58	2	HSPD1	88.7	89.3	157.9	143.2	75.8	54	82.5	107.6	105	95.9
P08238	Heat shock protein HSP 90-beta [OS=Homo sapiens]	3	2	2	2	724	83.2	5.03	6.02	2	HSP90AB1	109	110.3	95.8	90.3	76.2	89.8	64	137.7	114.7	112.2
Q9HC36	rRNA methyltransferase 3, mitochondrial [OS=Homo sapiens]	5	2	2	2	420	47	8.73	6.21	2	MRM3	82.6	92.3	124.9	142.4	100.7	87	80.6	97.9	94.9	96.8
Q03393	6-pyruvoyl tetrahydrobiopterin synthase [OS=Homo sapiens]	17	2	2	2	145	16.4	6.68	2.54	2	PTS	78.9	103.2	119.8	108.1	104.5	101	86	101.7	102.9	94
Q9Y2R9	28S ribosomal protein S7, mitochondrial [OS=Homo sapiens]	10	2	2	2	242	28.1	9.99	6.6	2	MRPS7	93.5	87.6	117.7	135.1	85.5	100.7	85.1	97.7	98.1	99
Q08170	Serine/arginine-rich splicing factor 4 [OS=Homo sapiens]	4	2	2	1	494	56.6	11.52	6.67	2	SRSF4	118.8	80.8	126.5	82.2	81.6	58.2	130	124	109.5	88.3
Q14690	Protein RRP5 homolog [OS=Homo sapiens]	1	2	2	2	1871	208.6	8.87	3	2	PDCD11	82.8	99.5	104.9	100.5	92.3	78.2	148.1	88.2	96.4	109.1
Q9UNQ2	Probable dimethyladenosine transferase [OS=Homo sapiens]	10	2	2	2	313	35.2	9.99	7.93	2	DIMT1	95.3	104.8	86.3	72	109.7	87	134	105.9	102.9	102.1
Q93008	Probable ubiquitin carboxyl-terminal hydrolase FAF-X [OS=Homo sapiens]	1	2	2	2	2554	290.3	5.8	7.05	2	USP9X	100.2	93.3	123.1	114.1	90.3	87.9	96.7	101.8	90.4	102.2
Q9Y3D3	28S ribosomal protein S16, mitochondrial [OS=Homo sapiens]	24	2	2	2	137	15.3	9.5	6.44	2	MRPS16	94	100.3	129.6	102.8	102.4	86.1	91.8	101.3	103.4	88.3
Q14152	Eukaryotic translation initiation factor 3 subunit A [OS=Homo sapiens]	2	2	2	2	1382	166.5	6.79	4.65	2	EIF3A	99.7	106	107.9	92.4	95.3	81.8	112.6	104.9	114	85.5
P62314	Small nuclear ribonucleoprotein Sm D1 [OS=Homo sapiens]	20	2	2	2	119	13.3	11.56	5.6	2	SNRPD1	105.9	102.9	93.3	94.8	97.1	104.1	95.6	94.3	109.9	102
P09012	U1 small nuclear ribonucleoprotein A [OS=Homo sapiens]	6	2	2	2	282	31.3	9.83	4.31	2	SNRPA	102.7	108.6	93.2	91.3	101.5	92.4	103	105.3	99.5	102.5
Q6P5R6	60S ribosomal protein L22-like 1 [OS=Homo sapiens]	30	2	3	2	122	14.6	9.38	12.89	2	RPL22L1	107.3	101	108.8	93.9	98.4	96.7	98.1	99.6	103.6	92.5
Q03701	CCAAT/enhancer-binding protein zeta [OS=Homo sapiens]	3	2	2	2	1054	120.9	5.94	3.3	2	CEBPZ	106.3	109.9	79	90.2	98.9	109.1	105.2	94.7	94.2	112.4
Q15717	ELAV-like protein 1 [OS=Homo sapiens]	8	2	2	2	326	36.1	9.17	7.29	2	ELAVL1	110.6	99.2	113.9	108.3	87	89.4	100.1	96.8	88.9	105.9
Q9UBU9	Nuclear RNA export factor 1 [OS=Homo sapiens]	4	2	2	2	619	70.1	8.51	6.12	2	NXF1	92.6	93.1	123.4	136	106.1	93.3	99.2	77.6	80.6	97.9
Q12872	Splicing factor, suppressor of white-apricot homolog [OS=Homo sapiens]	2	2	2	2	951	104.8	8.05	3.85	2	SFSWAP	110.3	99.5	106.4	111.4	104.4	69.9	108.8	104.4	96.8	88.1
Q71UM5	40S ribosomal protein S27-like [OS=Homo sapiens]	25	2	3	2	84	9.5	9.45	7.36	2	RPS27L	114.9	107.8	89.4	91.6	96.5	97.7	100.7	103.7	104.7	92.9
P41091	Eukaryotic translation initiation factor 2 subunit 3 [OS=Homo sapiens]	4	2	2	2	472	51.1	8.4	5.65	2	EIF2S3	107.7	109.7	86.7	80.6	100	96.8	127	95.9	90.9	104.8
P52907	F-actin-capping protein subunit alpha-1 [OS=Homo sapiens]	6	2	2	2	286	32.9	5.69	4.81	2	CAPZA1	102	101.6	91.8	83.4	116.2	95.1	140.4	84.4	89.7	95.5
P62995	Transformer-2 protein homolog beta [OS=Homo sapiens]	7	2	2	2	288	33.6	11.25	5.4	2	TRA2B	111.6	107	106.2	84.8	94	100.2	108.3	87.9	90.6	109.4
Q07021	Complement component 1 Q subcomponent-binding protein, mitochondrial [OS=Homo sapiens]	15	2	4	2	282	31.3	4.84	15.55	2	C1QBP	96.5	101.7	115.7	111.7	101.2	93.3	121	74.4	86.2	98.3
Q15050	Ribosome biogenesis regulatory protein homolog [OS=Homo sapiens]	7	2	2	2	365	41.2	10.7	5.46	2	RRS1	134.5	98.7	86.8	80.5	105	91	100.1	94	101.1	108.4
Q9Y2Q9	28S ribosomal protein S28, mitochondrial [OS=Homo sapiens]	11	2	2	2	187	20.8	9.1	6.09	2	MRPS28	105.8	102.1	130.3	115.3	103.6	80.2	93.3	87.1	80.3	102
Q5JTH9	RRP12-like protein [OS=Homo sapiens]	2	2	2	2	1297	143.6	8.75	5.56	2	RRP12	108.4	114.5	91.2	86.8	124.9	106.9	97.8	89.3	87.4	92.9
P62318	Small nuclear ribonucleoprotein Sm D3 [OS=Homo sapiens]	15	2	3	2	126	13.9	10.32	8.47	2	SNRPD3	114.5	119.8	83.6	91.3	102.3	101.8	104.6	92.5	92.2	97.4
Q8N5N7	39S ribosomal protein L50, mitochondrial [OS=Homo sapiens]	16	2	2	2	158	18.3	7.88	5.75	2	MRPL50	122.2	98.5	143.5	122.7	97.3	80.5	89.9	82.6	77.3	85.4
P09874	Poly [ADP-ribose] polymerase 1 [OS=Homo sapiens]	3	2	2	2	1014	113	8.88	6.18	2	PARP1	105.9	142	95.1	114.5	70.5	83.1	115.1	88.2	104.6	80.9
A0A0B4J2D5	Putative glutamine amidotransferase-like class 1 domain-containing protein 3B, mitochondrial [OS=Homo sapiens]	12	2	2	2	268	28.1	8.27	6.82	2	GATD3B	41.7	24.9	372.9	325.4	63.7	67.3	30.7	28.3	22.4	22.7
Q8N983	39S ribosomal protein L43, mitochondrial [OS=Homo sapiens]	11	2	2	2	215	23.4	8.65	6.41	2	MRPL43	132.6	108.6	122.2	98.7	77	100.1	95.1	92.9	79.7	93
Q9Y2W1	Thyroid hormone receptor-associated protein 3 [OS=Homo sapiens]	2	2	2	2	955	108.6	10.15	4.63	2	THRAP3	132.7	129.7	94.4	75.5	106.3	91.1	112.5	80.2	75.2	102.4
P13797	Plastin-3 [OS=Homo sapiens]	3	2	2	2	630	70.8	5.6	2.53	2	PLS3	134.2	131.6	91.5	93.4	97.5	99	93.8	85.9	86.5	86.8
Q8N5Z5	BTB/POZ domain-containing protein KCTD17 [OS=Homo sapiens]	15	2	3	2	321	35.6	4.86	12.86	2	KCTD17	136.1	146.4	74.8	87.5	103.1	74.4	111.4	79.8	86.1	100.6
P02768	Albumin [OS=Homo sapiens]	4	2	2	2	609	69.3	6.28	5.68	2	ALB	128.3	146.8	73.5	72.4	104.7	104	134.9	73.2	74.7	87.4
Q8NC51	Plasminogen activator inhibitor 1 RNA-binding protein [OS=Homo sapiens]	7	2	2	2	408	44.9	8.65	2.81	2	SERBP1	135.3	163.2	121.7	104.1	83.6	76.4	74.7	80.6	85.8	74.5
Q07666	KH domain-containing, RNA-binding, signal transduction-associated protein 1 [OS=Homo sapiens]	8	2	2	2	443	48.2	8.66	6.26	2	KHDRBS1	116	137.9	141.2	144	79	105.6	78.4	70.5	64.9	62.5
Q9NZT2	Opioid growth factor receptor [OS=Homo sapiens]	4	3	3	3	677	73.3	4.84	6.16	3	OGFR	32.1	41.3	140	132.1	91.5	83.3	76.5	128.1	136.1	139
Q96SZ5	2-aminoethanethiol dioxygenase [OS=Homo sapiens]	13	3	3	3	270	29.7	6.04	7.9	3	ADO	16.4	49.7	50.4	56.4	176.9	158.4	161.6	109.4	107.1	113.6
Q9NPD3	Exosome complex component RRP41 [OS=Homo sapiens]	15	3	4	3	245	26.4	6.52	8.98	3	EXOSC4	67.3	51.3	125.8	107.9	98.8	75.2	88.8	118.1	126.3	140.4
P27708	CAD protein [OS=Homo sapiens]	2	3	3	3	2225	242.8	6.46	10.41	3	CAD	54.4	62.3	178.2	174.6	65.9	92.3	51.6	115.1	101.7	104
P26358	DNA (cytosine-5)-methyltransferase 1 [OS=Homo sapiens]	2	3	3	3	1616	183.1	7.75	7.68	3	DNMT1	60	60.5	148.6	139.6	106.8	115.6	60.7	90	96.8	121.5
P51114	RNA-binding protein FXR1 [OS=Homo sapiens]	6	3	4	3	621	69.7	6.15	11.09	3	FXR1	61.9	86.2	105.7	99.8	109.5	87.4	73.4	129.8	129.8	116.6
Q96RL1	BRCA1-A complex subunit RAP80 [OS=Homo sapiens]	5	3	3	3	719	79.7	5.45	7.99	3	UIMC1	46.7	73.9	146.4	131.8	112.4	92.4	94.2	103.4	81.5	117.3
P26641	Elongation factor 1-gamma [OS=Homo sapiens]	5	3	3	3	437	50.1	6.67	7.83	3	EEF1G	59	50.8	148.1	149.3	118.5	111	102.6	88.9	91.6	80.2
Q99832	T-complex protein 1 subunit eta [OS=Homo sapiens]	5	3	3	3	543	59.3	7.65	4.4	3	CCT7	68.7	74.8	140.7	127.9	96.4	89.9	84.9	104.7	103.8	108.1
O60832	H/ACA ribonucleoprotein complex subunit DKC1 [OS=Homo sapiens]	4	3	3	3	514	57.6	9.42	5.65	3	DKC1	60.1	93.5	108.8	112.8	100.7	83.9	109.1	108.9	104.8	117.4
P50990	T-complex protein 1 subunit theta [OS=Homo sapiens]	6	3	3	3	548	59.6	5.6	8.58	3	CCT8	63.5	91.6	141.1	95.1	93.8	83.7	99.1	112.3	109.2	110.6
P62633	CCHC-type zinc finger nucleic acid binding protein [OS=Homo sapiens]	18	3	3	3	177	19.5	7.71	7.63	3	CNBP	85.9	79.3	104.3	93	100.5	102.3	106	116.7	113	98.9
P10644	cAMP-dependent protein kinase type I-alpha regulatory subunit [OS=Homo sapiens]	10	3	3	2	381	43	5.35	8.96	3	PRKAR1A	89.1	76.3	118.5	108.2	93.8	98	93.6	102.1	113	107.5
B5ME19	Eukaryotic translation initiation factor 3 subunit C-like protein [OS=Homo sapiens]	4	3	3	3	914	105.4	5.64	7.84	3	EIF3CL	103.8	71.3	89.4	100.9	87.2	101.1	115.1	105.5	90	135.7
P11274	Breakpoint cluster region protein [OS=Homo sapiens]	3	3	3	3	1271	142.7	7.03	6.39	3	BCR	84.8	92.1	102.8	91.3	104.2	93.7	107	105.2	104.4	114.5
P60900	Proteasome subunit alpha type-6 [OS=Homo sapiens]	15	3	3	3	246	27.4	6.76	8.49	3	PSMA6	79.4	82.1	108.3	104.3	118.1	115.5	108.8	97.8	94.4	91.5
Q9BWJ5	Splicing factor 3B subunit 5 [OS=Homo sapiens]	38	3	3	3	86	10.1	6.35	8.32	3	SF3B5	77.5	94.5	94.6	95.4	121	95.3	122.1	123.1	94.3	82.2
Q2NL82	Pre-rRNA-processing protein TSR1 homolog [OS=Homo sapiens]	4	3	3	3	804	91.8	7.42	8.25	3	TSR1	85.7	105.4	95.3	98	96.7	87.7	98.8	108.7	111.7	111.9
Q13610	Periodic tryptophan protein 1 homolog [OS=Homo sapiens]	7	3	3	3	501	55.8	4.77	8.76	3	PWP1	100	90.7	94.6	85.1	97.7	93.2	115.3	102.3	102	119.2
Q9Y2R4	Probable ATP-dependent RNA helicase DDX52 [OS=Homo sapiens]	6	3	3	2	599	67.4	9.67	5.88	3	DDX52	86.7	80.9	82.7	70	86.1	235.9	83	90.5	85.1	99.1
P17987	T-complex protein 1 subunit alpha [OS=Homo sapiens]	8	3	3	3	556	60.3	6.11	9.19	3	TCP1	89.4	99.9	104.6	107.9	104	86.7	98.2	113	95.4	100.8
Q5RKV6	Exosome complex component MTR3 [OS=Homo sapiens]	15	3	3	3	272	28.2	6.28	8.96	3	EXOSC6	95	94.6	105.6	102.8	95.6	92.8	104.1	106.7	93.6	109.1
P62316	Small nuclear ribonucleoprotein Sm D2 [OS=Homo sapiens]	23	3	4	3	118	13.5	9.91	9.34	3	SNRPD2	86.7	102.9	97.3	98	101	103.1	110.8	105.9	93.9	100.5
Q14684	Ribosomal RNA processing protein 1 homolog B [OS=Homo sapiens]	5	3	3	3	758	84.4	9.76	7.94	3	RRP1B	94.2	96.8	88.1	111.7	140.7	75	92.7	97.1	91.2	112.6
O75934	Pre-mRNA-splicing factor SPF27 [OS=Homo sapiens]	23	3	3	3	225	26.1	5.66	10.74	3	BCAS2	74.4	138.4	102.5	84.3	92.1	74.7	98.8	98.9	106.9	129
Q9Y221	60S ribosome subunit biogenesis protein NIP7 homolog [OS=Homo sapiens]	21	3	3	3	180	20.4	8.51	8.36	3	NIP7	102.1	105.3	92.9	83.2	98.2	97.9	99.4	105.5	99.2	116.2
Q9NXS2	Glutaminyl-peptide cyclotransferase-like protein [OS=Homo sapiens]	11	3	3	3	382	42.9	9.82	7.92	3	QPCTL	96.7	99.9	101.5	92.2	109	93.1	107.9	94	101.2	104.6
P37108	Signal recognition particle 14 kDa protein [OS=Homo sapiens]	18	3	3	3	136	14.6	10.04	7.48	3	SRP14	120.5	100.5	77	81.9	94.3	98.7	93	117.8	106.7	109.6
Q71UI9	Histone H2A.V [OS=Homo sapiens]	23	3	3	1	128	13.5	10.58	8.8	3	H2AZ2	111.3	103.2	83.5	82.1	98	91.8	108.2	102.8	103.3	115.8
Q13243	Serine/arginine-rich splicing factor 5 [OS=Homo sapiens]	10	3	3	2	272	31.2	11.59	7.59	3	SRSF5	94.5	106.1	106.3	98.1	101	90.1	103.2	100.3	97.3	103.2
P62861	FAU ubiquitin-like and ribosomal protein S30 [OS=Homo sapiens]	9	3	3	3	133	14.4	10.17	8.63	3	FAU	104.7	98.5	93.4	94.3	104.2	99.3	101.4	98.3	103.6	102.2
Q86VM9	Zinc finger CCCH domain-containing protein 18 [OS=Homo sapiens]	4	3	3	3	953	106.3	8.32	9.89	3	ZC3H18	94.7	99.8	128.5	94.4	73.2	103.1	118.8	86.1	105.5	95.8
Q9Y3T9	Nucleolar complex protein 2 homolog [OS=Homo sapiens]	4	3	3	3	749	84.9	5.62	5.22	3	NOC2L	85.4	106	100.2	91.7	107.2	107.3	119.6	86.7	89	106.8
P82930	28S ribosomal protein S34, mitochondrial [OS=Homo sapiens]	16	3	3	3	218	25.6	9.98	7.51	3	MRPS34	106.7	82.9	129.4	134.6	95.2	96.3	83.7	92.8	93.4	85
P09661	U2 small nuclear ribonucleoprotein A' [OS=Homo sapiens]	16	3	3	3	255	28.4	8.62	10.86	3	SNRPA1	104.7	110.3	102.3	95.2	96.3	96.3	101.9	98.5	94.1	100.3
Q7Z6Z7	E3 ubiquitin-protein ligase HUWE1 [OS=Homo sapiens]	1	3	3	3	4374	481.6	5.22	7.9	3	HUWE1	89.1	108	114.1	90.2	110.7	95.7	124.2	85.7	82.7	99.6
Q9BQ67	Glutamate-rich WD repeat-containing protein 1 [OS=Homo sapiens]	9	3	3	3	446	49.4	4.92	9.81	3	GRWD1	97.6	114.6	107.9	96.7	105.3	98.8	97.5	102.1	92.3	87.3
Q92974	Rho guanine nucleotide exchange factor 2 [OS=Homo sapiens]	4	3	3	3	986	111.5	7.27	10.61	3	ARHGEF2	105.8	104	99.2	93.1	99.8	103.8	116.9	94.8	95	87.5
Q8TDN6	Ribosome biogenesis protein BRX1 homolog [OS=Homo sapiens]	9	3	3	3	353	41.4	9.92	4.86	3	BRIX1	118.4	112.8	79.1	75.6	108.5	107.5	101.5	97.6	96.4	102.6
P13010	X-ray repair cross-complementing protein 5 [OS=Homo sapiens]	5	3	3	3	732	82.7	5.81	9.39	3	XRCC5	112.7	106.4	103.3	114.8	93.7	97.8	92	101.2	93.2	84.8
P06753	Tropomyosin alpha-3 chain [OS=Homo sapiens]	10	3	3	3	285	32.9	4.72	7.56	3	TPM3	122	111.1	105.5	102.5	98.7	99.9	80	96.4	93.8	90.1
Q99417	c-Myc-binding protein [OS=Homo sapiens]	35	3	3	3	103	12	5.91	7.74	3	MYCBP	123.2	99	103	96.8	97.5	100.5	114.9	93.1	88.3	83.7
Q13813	Spectrin alpha chain, non-erythrocytic 1 [OS=Homo sapiens]	1	3	3	3	2472	284.4	5.35	7.48	3	SPTAN1	127.2	110.6	91.2	83	97	103	109	86.5	93.1	99.5
Q9BUJ2	Heterogeneous nuclear ribonucleoprotein U-like protein 1 [OS=Homo sapiens]	5	3	3	3	856	95.7	6.92	9.63	3	HNRNPUL1	110.1	144.6	98.6	98.8	93.3	73.8	83.7	93	93.6	110.4
Q16637	Survival motor neuron protein [OS=Homo sapiens]	13	3	4	3	294	31.8	6.55	12.25	3	SMN1; SMN2	117.4	119.9	100.1	98.1	106.4	91.8	95.8	91	86.1	93.4
Q8NE71	ATP-binding cassette sub-family F member 1 [OS=Homo sapiens]	6	3	3	3	845	95.9	6.8	10.54	3	ABCF1	120.2	134	94.1	83.6	99	91.6	99.2	97.3	92.8	88.2
Q01804	OTU domain-containing protein 4 [OS=Homo sapiens]	4	3	3	3	1114	124	6.71	8.67	3	OTUD4	120.2	134.6	95	75.2	111.9	104.7	80.7	99.3	76.1	102.3
Q92598	Heat shock protein 105 kDa [OS=Homo sapiens]	4	3	4	3	858	96.8	5.39	11.2	3	HSPH1	104.6	139.3	76.7	77.1	95.5	195.3	86.8	76.8	73.4	74.6
P32929	Cystathionine gamma-lyase [OS=Homo sapiens]	14	4	6	4	405	44.5	6.7	16.29	4	CTH	16.9	27.3	38.2	27.7	29	40.3	52.2	260.3	269.7	238.3
Q13045	Protein flightless-1 homolog [OS=Homo sapiens]	4	4	4	4	1269	144.7	6.05	11.28	4	FLII	43.9	53.9	93.3	73.7	63.8	70.4	61.7	174.6	179.5	185.2
P10599	Thioredoxin [OS=Homo sapiens]	30	4	6	4	105	11.7	4.92	16.14	4	TXN	36.9	36	120.9	127.6	124	123.9	118	113.4	110.8	88.5
Q9NWU2	Glucose-induced degradation protein 8 homolog [OS=Homo sapiens]	30	4	4	4	228	26.7	4.97	12.01	4	GID8	34.8	55.5	133.2	127.9	107.8	99.8	85.7	102	123.3	129.9
P31946	14-3-3 protein beta/alpha [OS=Homo sapiens]	16	4	4	1	246	28.1	4.83	12.93	4	YWHAB	49	54.6	137.8	149.4	90.8	89.1	85.7	119.2	117.2	107.2
P04637	Cellular tumor antigen p53 [OS=Homo sapiens]	12	4	5	4	393	43.6	6.79	13.06	4	TP53	71.9	51.7	125.4	108.1	85.2	102.3	67.4	129.6	108.4	150.2
Q15366	Poly(rC)-binding protein 2 [OS=Homo sapiens]	12	4	4	2	365	38.6	6.79	12.24	4	PCBP2	60.6	72.3	120.8	112.1	95	82.1	82.3	124.9	136.6	113.4
Q14145	Kelch-like ECH-associated protein 1 [OS=Homo sapiens]	6	4	4	4	624	69.6	6.44	8.23	4	KEAP1	57	72.1	111.9	107.1	119.6	83.4	86.8	120.3	117.3	124.5
Q6P158	Putative ATP-dependent RNA helicase DHX57 [OS=Homo sapiens]	3	4	4	3	1386	155.5	7.71	8.15	4	DHX57	69.9	63	113.1	108.8	90.9	100.2	94.6	124	120.8	114.7
Q8WYQ5	Microprocessor complex subunit DGCR8 [OS=Homo sapiens]	5	4	4	4	773	86	5.95	9.82	4	DGCR8	68.4	56	144.9	137.2	80.2	76.1	105.1	112.7	90.2	129.1
Q96EY4	Translation machinery-associated protein 16 [OS=Homo sapiens]	27	4	5	4	203	23.8	9.26	14.85	4	TMA16	72	62.8	119.8	118.2	86.3	92.5	95.1	119.7	112.9	120.5
P55265	Double-stranded RNA-specific adenosine deaminase [OS=Homo sapiens]	3	4	4	4	1226	136	8.65	10.18	4	ADAR	63.8	61	134.4	153.6	107.8	65.2	100.2	95.2	108	110.7
Q9ULW0	Targeting protein for Xklp2 [OS=Homo sapiens]	5	4	4	4	747	85.6	9.23	11.94	4	TPX2	54.8	82	166.6	130.5	83.2	79.9	78.2	110.8	88.8	125.3
Q9H6R4	Nucleolar protein 6 [OS=Homo sapiens]	6	4	4	4	1146	127.5	7.64	13.98	4	NOL6	70.4	60.9	127.7	130.3	91.8	111.7	96	107.1	86.9	117.2
P36873	Serine/threonine-protein phosphatase PP1-gamma catalytic subunit [OS=Homo sapiens]	15	4	4	4	323	37	6.54	10.56	4	PPP1CC	75	68.6	115.7	104.7	99.2	105.3	104.8	109.4	112.3	105.1
Q9Y4W2	Ribosomal biogenesis protein LAS1L [OS=Homo sapiens]	6	4	4	4	734	83	4.73	10.86	4	LAS1L	87.4	80.2	97.6	91.8	97.2	89.4	90.7	119.2	121.1	125.5
P46109	Crk-like protein [OS=Homo sapiens]	16	4	4	4	303	33.8	6.74	9.39	4	CRKL	51.6	68.5	167.5	149.1	110.7	100.9	93.4	84.4	79.1	94.7
O00410	Importin-5 [OS=Homo sapiens]	5	4	4	4	1097	123.6	4.94	12.28	4	IPO5	65.4	68.2	141.9	131.4	120.8	108.4	80.9	92	97.6	93.6
Q99848	Probable rRNA-processing protein EBP2 [OS=Homo sapiens]	13	4	4	4	306	34.8	10.1	10.73	4	EBNA1BP2	92.5	83.8	106.7	84.1	94	111.2	101	112	88	126.7
Q01780	Exosome component 10 [OS=Homo sapiens]	7	4	4	4	885	100.8	8.46	9.6	4	EXOSC10	89.8	83.1	106.3	91.9	107.6	100.9	102.5	96.9	100.4	120.6
P08621	U1 small nuclear ribonucleoprotein 70 kDa [OS=Homo sapiens]	11	4	4	4	437	51.5	9.94	12.58	4	SNRNP70	80.7	100.7	113.2	89.9	97.3	93.5	97.6	102.7	105.3	119.2
Q99575	Ribonucleases P/MRP protein subunit POP1 [OS=Homo sapiens]	6	4	4	4	1024	114.6	9.22	13.78	4	POP1	114.7	69.7	101.3	91	98	93.1	111.5	103	106.1	111.7
Q8TD19	Serine/threonine-protein kinase Nek9 [OS=Homo sapiens]	5	4	4	4	979	107.1	5.74	7.55	4	NEK9	70.2	70.6	214.9	170.9	85.1	90.9	63.6	77.9	78.4	77.5
P22087	rRNA 2'-O-methyltransferase fibrillarin [OS=Homo sapiens]	19	4	4	4	321	33.8	10.18	14.93	4	FBL	95.5	100.9	80	87.8	104.4	103.5	105.1	108.8	104.3	109.7
P30153	Serine/threonine-protein phosphatase 2A 65 kDa regulatory subunit A alpha isoform [OS=Homo sapiens]	8	4	4	4	589	65.3	5.11	12.12	4	PPP2R1A	85.8	90.5	133.3	119.2	106.1	99.5	82.9	91.8	93.3	97.5
P82933	28S ribosomal protein S9, mitochondrial [OS=Homo sapiens]	11	4	4	4	396	45.8	9.51	11.21	4	MRPS9	91	90.5	128.2	147	87.5	87.6	78.5	94.3	98	97.4
P62913	60S ribosomal protein L11 [OS=Homo sapiens]	21	4	7	4	178	20.2	9.6	17.43	4	RPL11	98.3	100.3	94.4	91.9	100.8	101.8	97.3	105.4	110.1	99.7
P56270	Myc-associated zinc finger protein [OS=Homo sapiens]	8	4	4	4	477	48.6	8.95	7.79	4	MAZ	114	85.3	99.2	102.3	99.6	83.7	104.2	98.2	112.1	101.4
Q6PKG0	La-related protein 1 [OS=Homo sapiens]	5	4	4	4	1096	123.4	8.82	8.94	4	LARP1	112.6	84.8	93.8	96.8	100	100.5	104.3	101.6	93.1	112.5
Q16777	Histone H2A type 2-C [OS=Homo sapiens]	36	4	5	2	129	14	10.9	14.38	4	H2AC20	104.3	109.7	76.1	86.7	94	99.7	110.9	102.8	107.7	108.1
Q13395	Probable methyltransferase TARBP1 [OS=Homo sapiens]	3	4	4	4	1621	181.6	7.05	11.28	4	TARBP1	59.2	67.5	56.7	39.9	202.5	183.1	203.5	61.2	61.6	64.7
P61513	60S ribosomal protein L37a [OS=Homo sapiens]	39	4	6	4	92	10.3	10.43	13.86	4	RPL37A	98.9	111.7	72.8	91.3	97	112.9	104.4	102.3	110.1	98.6
P48643	T-complex protein 1 subunit epsilon [OS=Homo sapiens]	8	4	4	4	541	59.6	5.66	9.18	4	CCT5	112.9	97.7	108.2	112.1	83.1	90.7	86.5	104.8	104	100
P62854	40S ribosomal protein S26 [OS=Homo sapiens]	44	4	7	4	115	13	11	18.52	4	RPS26	108.3	100	88.5	87.8	105.5	103.1	102.5	106	103.2	95.1
Q96GA3	Protein LTV1 homolog [OS=Homo sapiens]	9	4	4	4	475	54.8	4.91	7.91	4	LTV1	99.1	117.3	85.1	99.8	95.5	96.6	93.7	101.5	110.9	100.6
Q9BYN8	28S ribosomal protein S26, mitochondrial [OS=Homo sapiens]	15	4	4	4	205	24.2	10.39	11.68	4	MRPS26	94.3	107	134.8	118.1	87.1	78.5	96.2	98.6	83.9	101.4
O43290	U4/U6.U5 tri-snRNP-associated protein 1 [OS=Homo sapiens]	5	4	4	4	800	90.2	6.13	8.57	4	SART1	105.1	109.8	92.8	87	102.5	98.2	102.6	98.1	93.9	110
P78316	Nucleolar protein 14 [OS=Homo sapiens]	4	4	4	4	857	97.6	7.58	5.22	4	NOP14	97.2	115.2	84.4	89.9	107.8	98.6	110.2	90.7	92.6	113.6
P05455	Lupus La protein [OS=Homo sapiens]	9	4	4	4	408	46.8	7.12	10.37	4	SSB	138.7	94.9	104.1	83.5	90.7	88.9	80.6	104.3	103.1	111.3
P62841	40S ribosomal protein S15 [OS=Homo sapiens]	37	4	6	4	145	17	10.39	13	4	RPS15	113.4	112.2	86.1	94.7	95.2	104.9	98.2	105.6	99.6	90
P14678	Small nuclear ribonucleoprotein-associated proteins B and B' [OS=Homo sapiens]	16	4	5	4	240	24.6	11.19	14.85	4	SNRPB	112.4	112.2	98.2	87	105.3	88.2	110.1	95.7	89.2	101.7
Q8IYB3	Serine/arginine repetitive matrix protein 1 [OS=Homo sapiens]	4	4	4	4	904	102.3	11.84	10.98	4	SRRM1	127.5	105.7	74	93.3	101.5	96.9	116.6	90.6	101.3	92.7
Q16695	Histone H3.1t [OS=Homo sapiens]	23	4	4	4	136	15.5	11.12	9.06	4	H3-4	141.4	119.5	82	82.2	110.9	106.5	89.3	72.2	99.1	97
Q04637	Eukaryotic translation initiation factor 4 gamma 1 [OS=Homo sapiens]	3	4	4	4	1599	175.4	5.33	12.53	4	EIF4G1	126.8	142.2	108.2	94.1	91.9	84.1	76.2	95.5	92.7	88.4
P12956	X-ray repair cross-complementing protein 6 [OS=Homo sapiens]	8	4	5	4	609	69.8	6.64	15.09	4	XRCC6	131.6	127.9	83.8	80.1	101.6	102.2	111.2	83.4	87.4	90.9
Q9NX58	Cell growth-regulating nucleolar protein [OS=Homo sapiens]	11	4	5	4	379	43.6	9.57	14.31	4	LYAR	131.3	141.4	76.8	70.1	106.7	105.7	116.8	84.4	81.6	85.1
Q9H3K6	BolA-like protein 2 [OS=Homo sapiens]	59	4	5	4	86	10.1	6.52	14.09	4	BOLA2; BOLA2B	150	162.2	75.7	70.5	100.3	93.9	106.1	64.9	63.8	112.7
A2NJV5	Immunoglobulin kappa variable 2-29 [OS=Homo sapiens]	19	4	10	4	120	13.1	7.28	23.41	4	IGKV2-29	153.9	158.9	66.9	68.2	106.7	104.7	113.4	70.9	74.5	81.9
O76003	Glutaredoxin-3 [OS=Homo sapiens]	13	5	5	5	335	37.4	5.39	13.45	5	GLRX3	17.6	11.6	17	18	127.8	139	122.9	195.2	197.8	153
Q9NXF7	DDB1- and CUL4-associated factor 16 [OS=Homo sapiens]	37	5	9	5	216	24.2	6.04	25.37	5	DCAF16	30.7	28.9	94.4	92.1	95.1	95.8	91.6	163.6	161.1	146.9
Q16576	Histone-binding protein RBBP7 [OS=Homo sapiens]	10	5	5	1	425	47.8	5.05	13.95	5	RBBP7	25.7	34.9	148.4	144.6	90.7	73.1	102.9	117.2	129.4	133.1
Q9Y3F4	Serine-threonine kinase receptor-associated protein [OS=Homo sapiens]	19	5	5	5	350	38.4	5.12	15.17	5	STRAP	60.9	38.4	125.6	128.6	64.1	85.9	88.9	109.2	113.2	185.3
P57678	Gem-associated protein 4 [OS=Homo sapiens]	5	5	5	5	1058	120	6.04	14.18	5	GEMIN4	55.7	52.8	142	114.9	78.1	103.2	70.9	127.5	117.6	137.4
Q8TEQ6	Gem-associated protein 5 [OS=Homo sapiens]	4	5	5	5	1508	168.5	6.62	12.21	5	GEMIN5	78	54.5	102.3	85.3	75.7	91.3	77.1	139.6	142.5	153.5
Q6DKJ4	Nucleoredoxin [OS=Homo sapiens]	14	5	5	5	435	48.4	4.97	16.49	5	NXN	32.9	37.1	231	236.7	86.1	87.4	63.2	73.7	76.5	75.5
Q92769	Histone deacetylase 2 [OS=Homo sapiens]	10	5	5	1	488	55.3	5.91	12.5	5	HDAC2	71.7	41.6	116.2	130.9	80.9	145	69.6	119.5	116.7	107.9
Q9H6S0	3'-5' RNA helicase YTHDC2 [OS=Homo sapiens]	4	5	5	5	1430	160.1	8.4	14.61	5	YTHDC2	77.6	94.6	103.7	82.5	81.4	80.1	82.2	113.6	142.5	141.9
P31689	DnaJ homolog subfamily A member 1 [OS=Homo sapiens]	14	5	5	5	397	44.8	7.08	16.62	5	DNAJA1	79.9	79.6	114.6	104.9	91	102.9	85.6	112.4	116.7	112.6
P51116	RNA-binding protein FXR2 [OS=Homo sapiens]	11	5	6	5	673	74.2	6.23	20.89	5	FXR2	79.3	97.4	101.3	90.6	102.3	91.8	99.5	113.3	108.1	116.4
Q06830	Peroxiredoxin-1 [OS=Homo sapiens]	22	5	5	3	199	22.1	8.13	12.82	5	PRDX1	80.2	83.4	129.1	133.2	89.5	87.2	91.2	104.1	97.7	104.4
Q9GZR7	ATP-dependent RNA helicase DDX24 [OS=Homo sapiens]	6	5	5	5	859	96.3	9.06	13.9	5	DDX24	96.1	94.9	101.6	94.9	102.5	97.7	98.3	94.9	101.8	117.2
P47914	60S ribosomal protein L29 [OS=Homo sapiens]	24	5	5	5	159	17.7	11.66	10.14	5	RPL29	97.2	98.2	89.1	88.2	108.6	104	96.6	102.5	111.9	103.7
Q9Y3U8	60S ribosomal protein L36 [OS=Homo sapiens]	30	5	7	5	105	12.2	11.59	23.47	5	RPL36	96.1	104.3	94.6	83.5	104.6	103.4	100.6	105.2	101.8	105.9
Q01081	Splicing factor U2AF 35 kDa subunit [OS=Homo sapiens]	24	5	5	5	240	27.9	8.81	14.46	5	U2AF1	98.2	96.6	105.5	103.3	101.2	93.5	99.4	104.5	94.4	103.5
P16989	Y-box-binding protein 3 [OS=Homo sapiens]	17	5	5	2	372	40.1	9.77	12.86	5	YBX3	124.8	84	100.1	73.6	114.1	80.5	107.3	86.8	113.3	115.5
Q9H0A0	RNA cytidine acetyltransferase [OS=Homo sapiens]	6	5	6	5	1025	115.7	8.27	18.21	5	NAT10	105.4	93.3	109.8	92	104.2	109.4	88.7	105.3	92.8	99.1
P62888	60S ribosomal protein L30 [OS=Homo sapiens]	50	5	7	5	115	12.8	9.63	23.36	5	RPL30	102.9	105.7	89.7	82.9	110.2	102.3	100.2	99.9	98.2	108
P08708	40S ribosomal protein S17 [OS=Homo sapiens]	39	5	8	5	135	15.5	9.85	23.9	5	RPS17	107.1	105.2	81.9	93.8	105.8	110.9	92.1	101.9	104.3	97.1
P46779	60S ribosomal protein L28 [OS=Homo sapiens]	32	5	5	5	137	15.7	12.02	11.8	5	RPL28	101.1	116	86.8	91.8	93.6	98.4	102.4	105.9	106.4	97.6
P35268	60S ribosomal protein L22 [OS=Homo sapiens]	45	5	6	5	128	14.8	9.19	19.93	5	RPL22	107.4	107.1	96.1	94.2	97.7	99.6	91.7	105	103.9	97.2
P05387	60S acidic ribosomal protein P2 [OS=Homo sapiens]	48	5	8	5	115	11.7	4.54	32.23	5	RPLP2	112.7	104.7	86.8	84.7	98	102.2	100.5	104	105.7	100.5
P49458	Signal recognition particle 9 kDa protein [OS=Homo sapiens]	50	5	5	5	86	10.1	7.97	11.45	5	SRP9	102.6	115.2	92.1	88	89.2	102.8	101.4	104.2	105.7	98.7
P49207	60S ribosomal protein L34 [OS=Homo sapiens]	34	5	6	5	117	13.3	11.47	15.11	5	RPL34	98.2	116.4	86.5	87.7	102.6	100.4	105.1	100.3	103.3	99.6
P83881	60S ribosomal protein L36a [OS=Homo sapiens]	42	5	6	1	106	12.4	10.58	14.2	5	RPL36A	107.1	111.4	85.4	94.2	100.5	101.7	94.1	101	104.9	99.6
O00567	Nucleolar protein 56 [OS=Homo sapiens]	10	5	5	5	594	66	9.19	14.85	5	NOP56	112.7	109.7	114.1	101.3	102.3	79.8	79	100.6	109.7	90.6
O60264	SWI/SNF-related matrix-associated actin-dependent regulator of chromatin subfamily A member 5 [OS=Homo sapiens]	5	5	6	5	1052	121.8	8.09	9.89	5	SMARCA5	103.3	126.1	81.3	71.1	103.1	107.6	111.7	90.7	85.4	119.7
P62851	40S ribosomal protein S25 [OS=Homo sapiens]	30	5	5	5	125	13.7	10.11	16.13	5	RPS25	116.8	117.1	88.8	83.6	98.3	101.4	105.4	99.5	102.1	87.1
P62805	Histone H4 [OS=Homo sapiens]	42	5	11	5	103	11.4	11.36	32.95	5	H4C1; H4C11; H4C12; H4C13; H4C14; H4C15; H4C16; H4C2; H4C3; H4C4; H4C5; H4C6; H4C8; H4C9	119.1	115.1	79.4	74	107.9	105.9	110.7	92.1	92	103.8
P68104	Elongation factor 1-alpha 1 [OS=Homo sapiens]	11	5	5	5	462	50.1	9.01	9.86	5	EEF1A1	117.2	120.2	106.3	105.3	92.2	98.4	100.8	88.3	82.4	88.8
Q9Y2H1	Serine/threonine-protein kinase 38-like [OS=Homo sapiens]	13	5	5	3	464	54	6.81	15.13	5	STK38L	110	133.2	89.6	76.7	107.4	97.1	121.4	82.2	87.3	95.1
O95881	Thioredoxin domain-containing protein 12 [OS=Homo sapiens]	35	5	7	5	172	19.2	5.4	23	5	TXNDC12	142.9	138.6	69.4	71.1	102.2	102.5	113.3	86.8	87.8	85.2
O15042	U2 snRNP-associated SURP motif-containing protein [OS=Homo sapiens]	5	5	6	5	1029	118.2	8.47	13.18	5	U2SURP	127.4	151.2	80.3	76.3	102.9	90.5	116.6	83.7	79.2	91.9
Q8IWX8	Calcium homeostasis endoplasmic reticulum protein [OS=Homo sapiens]	5	5	5	5	916	103.6	9.04	14.1	5	CHERP	143.1	143.6	82.2	80.6	95.7	93.5	120.9	77.8	77.2	85.4
Q9NXV2	BTB/POZ domain-containing protein KCTD5 [OS=Homo sapiens]	24	5	6	5	234	26.1	6.24	19.06	5	KCTD5	163.2	165.1	65.4	74.3	98.8	101.6	113.8	71	69.8	76.8
P30876	DNA-directed RNA polymerase II subunit RPB2 [OS=Homo sapiens]	6	6	6	6	1174	133.8	6.87	18.44	6	POLR2B	36.1	47.8	124.9	111.2	116	99.7	93	124	120.4	127
Q93009	Ubiquitin carboxyl-terminal hydrolase 7 [OS=Homo sapiens]	8	6	6	6	1102	128.2	5.55	21.79	6	USP7	57.7	62	94.2	86.5	96.6	87.7	87.4	143.9	142	142
Q9BU76	Multiple myeloma tumor-associated protein 2 [OS=Homo sapiens]	24	6	6	6	263	29.4	10.02	17.76	6	MMTAG2	79	69.5	133.1	111.7	104.3	90	90.3	104.2	107.8	110.1
Q5T3I0	G patch domain-containing protein 4 [OS=Homo sapiens]	16	6	6	6	446	50.4	9.63	16.66	6	GPATCH4	102.3	74	103.9	92.7	94.2	86.2	109	104.6	102.2	130.9
Q09028	Histone-binding protein RBBP4 [OS=Homo sapiens]	14	6	6	2	425	47.6	4.89	16.17	6	RBBP4	93.7	77.2	117.5	107.7	99.9	94.8	92	103.6	101.6	112
P48634	Protein PRRC2A [OS=Homo sapiens]	3	6	6	5	2157	228.7	9.45	13.46	6	PRRC2A	99.1	81.6	110.2	101.9	108.3	92.6	92.5	105.1	103.3	105.5
P29692	Elongation factor 1-delta [OS=Homo sapiens]	29	6	6	6	281	31.1	5.01	18.93	6	EEF1D	55.7	103.5	168.7	137.3	86	106.2	77.1	94.6	90.7	80
Q7Z2T5	TRMT1-like protein [OS=Homo sapiens]	12	6	8	6	733	81.7	7.88	24.48	6	TRMT1L	95.6	101.5	107.2	92.3	97.9	92	100.2	103.5	101.4	108.4
P46776	60S ribosomal protein L27a [OS=Homo sapiens]	24	6	10	6	148	16.6	11	31.44	6	RPL27A	99.1	105	91.6	87.1	104.5	98.2	97.9	103.7	105.8	107
Q16629	Serine/arginine-rich splicing factor 7 [OS=Homo sapiens]	26	6	6	5	238	27.4	11.82	14.28	6	SRSF7	92.9	103.2	108.7	96.1	88.8	92.4	118.4	83.2	101.6	114.7
O00411	DNA-directed RNA polymerase, mitochondrial [OS=Homo sapiens]	8	6	6	6	1230	138.5	8.98	18.46	6	POLRMT	100.1	87.5	132.6	125.2	99.9	90.4	87.1	90.6	88.3	98.3
Q13263	Transcription intermediary factor 1-beta [OS=Homo sapiens]	8	6	6	6	835	88.5	5.77	16.57	6	TRIM28	103.7	96.6	103.3	98.1	107.8	96.4	98.7	106.4	95.1	93.9
P62266	40S ribosomal protein S23 [OS=Homo sapiens]	30	6	7	6	143	15.8	10.49	24.45	6	RPS23	107.8	106.9	82.1	93.5	101.4	105.5	103.4	100.4	104.7	94.2
Q13895	Bystin [OS=Homo sapiens]	18	6	7	6	437	49.6	8.12	21.36	6	BYSL	111.6	107.2	102.8	83.8	103.4	95.6	92.9	99.8	101.3	101.5
Q07955	Serine/arginine-rich splicing factor 1 [OS=Homo sapiens]	29	6	6	6	248	27.7	10.36	17.08	6	SRSF1	115.9	99.4	97.3	81.9	112.5	93.1	103.3	101.9	89.8	104.9
Q8IWZ3	Ankyrin repeat and KH domain-containing protein 1 [OS=Homo sapiens]	3	6	7	1	2542	269.3	5.73	21.43	6	ANKHD1	108.7	102.7	114.6	95.8	102.4	93.8	95.2	103.1	94.1	89.7
P62847	40S ribosomal protein S24 [OS=Homo sapiens]	40	6	9	6	133	15.4	10.78	25.51	6	RPS24	113	105.4	88.2	89.3	103.3	106	99.5	103.2	101	91.1
O00425	Insulin-like growth factor 2 mRNA-binding protein 3 [OS=Homo sapiens]	11	6	6	3	579	63.7	8.87	14.51	6	IGF2BP3	109.5	106.7	92.4	92.7	93.6	107.4	107	98	103.3	89.3
P84098	60S ribosomal protein L19 [OS=Homo sapiens]	26	6	7	6	196	23.5	11.47	21.85	6	RPL19	113.5	114.3	87.1	87.5	98.7	104.9	95	103.7	101.5	93.8
Q9NYF8	Bcl-2-associated transcription factor 1 [OS=Homo sapiens]	7	6	6	6	920	106.1	9.98	15.42	6	BCLAF1	106.2	116.7	86.9	78.8	106.4	93.7	121.1	92.1	89.8	108.4
Q14444	Caprin-1 [OS=Homo sapiens]	9	6	6	6	709	78.3	5.25	15.07	6	CAPRIN1	106	112	105.4	91.4	98.9	92.5	112.6	91.5	91.8	97.9
Q14692	Ribosome biogenesis protein BMS1 homolog [OS=Homo sapiens]	6	6	6	6	1282	145.7	6.44	20.07	6	BMS1	107.9	120.2	95.7	79.4	105.3	94.1	108.4	94.3	93.1	101.5
P11387	DNA topoisomerase 1 [OS=Homo sapiens]	8	6	6	6	765	90.7	9.31	16.74	6	TOP1	117.8	111	97.1	79.7	102.6	99.6	103.2	90.9	95.5	102.7
P84103	Serine/arginine-rich splicing factor 3 [OS=Homo sapiens]	38	6	6	5	164	19.3	11.65	15.59	6	SRSF3	103.9	124.2	85.3	110.7	96.1	96.9	96.8	87.7	101.8	96.5
Q9Y5Q8	General transcription factor 3C polypeptide 5 [OS=Homo sapiens]	15	6	6	6	519	59.5	6.9	13.59	6	GTF3C5	104.7	128.4	105.9	100.4	90.6	86	96.7	98	95.1	94.3
P42766	60S ribosomal protein L35 [OS=Homo sapiens]	30	6	6	6	123	14.5	11.05	9.57	6	RPL35	125	110.1	84.4	86.1	101.9	110.8	98.5	99.5	96.6	87.1
Q9BRS2	Serine/threonine-protein kinase RIO1 [OS=Homo sapiens]	13	6	6	6	568	65.5	6.19	17.18	6	RIOK1	103.2	120.7	101.1	83.2	108.3	90.5	123.7	87.4	83.5	98.3
P67809	Y-box-binding protein 1 [OS=Homo sapiens]	17	6	9	3	324	35.9	9.88	20.63	6	YBX1	119.8	119.6	79.2	96.9	93.1	108.5	98.9	99.4	100.4	84.2
P24752	Acetyl-CoA acetyltransferase, mitochondrial [OS=Homo sapiens]	14	6	6	6	427	45.2	8.85	14.98	6	ACAT1	37.4	39.7	286.9	298.5	105.6	102.7	41.7	30.1	27.2	30.1
P11021	Endoplasmic reticulum chaperone BiP [OS=Homo sapiens]	10	6	7	4	654	72.3	5.16	19.59	6	HSPA5	149.4	74.1	145.4	131.3	105.1	70.4	81.3	88.7	77.5	76.8
P60866	40S ribosomal protein S20 [OS=Homo sapiens]	36	6	6	6	119	13.4	9.94	15.01	6	RPS20	127.8	128.4	91.6	89.9	96	94.5	94.8	94.4	95.9	86.7
Q9P1Y5	Calmodulin-regulated spectrin-associated protein 3 [OS=Homo sapiens]	8	6	6	6	1249	134.7	8.35	19.49	6	CAMSAP3	97.9	174.4	97.1	81.3	96.4	73.7	123.5	87.5	75.3	92.9
Q9Y657	Spindlin-1 [OS=Homo sapiens]	32	6	8	6	262	29.6	6.96	24.69	6	SPIN1	141.1	140.2	66.7	71.5	109.8	111.4	118.2	80.4	78.6	82.1
Q9Y2I1	Nischarin [OS=Homo sapiens]	7	7	9	7	1504	166.5	5.14	27.09	7	NISCH	47.6	57.9	93.7	81.7	72	75.6	74.7	157.2	154.1	185.4
Q7Z2W4	Zinc finger CCCH-type antiviral protein 1 [OS=Homo sapiens]	9	7	7	7	902	101.4	8.4	21.21	7	ZC3HAV1	52.5	52.6	125.1	108.2	89.1	103.9	80.9	138.2	122.4	127.2
P13639	Elongation factor 2 [OS=Homo sapiens]	9	7	7	6	858	95.3	6.83	17.89	7	EEF2	57.7	56.1	132.3	93.9	99	96.1	86.2	127.1	126.4	125.3
O75534	Cold shock domain-containing protein E1 [OS=Homo sapiens]	9	7	7	7	798	88.8	6.25	14.29	7	CSDE1	59.2	61.9	97.5	116.7	133	69	171.9	101.6	106.3	83
Q13547	Histone deacetylase 1 [OS=Homo sapiens]	17	7	7	3	482	55.1	5.48	15.82	7	HDAC1	65.6	66.5	112	101	96.9	160.7	86.3	102.2	93.4	115.4
Q13162	Peroxiredoxin-4 [OS=Homo sapiens]	33	7	7	5	271	30.5	6.29	24.26	7	PRDX4	47.3	49.1	263.1	232	71.7	67.9	54.4	73.6	67.8	73.1
Q96HS1	Serine/threonine-protein phosphatase PGAM5, mitochondrial [OS=Homo sapiens]	28	7	8	7	289	32	8.68	23.12	7	PGAM5	78.6	81.2	108.8	96.1	94.1	96.3	97.8	116.1	111	120.1
Q9H2U1	ATP-dependent DNA/RNA helicase DHX36 [OS=Homo sapiens]	8	7	9	6	1008	114.7	7.68	19.55	7	DHX36	74.1	85.2	127.6	122.6	94.4	95	94.9	104.3	100.2	101.7
Q14008	Cytoskeleton-associated protein 5 [OS=Homo sapiens]	4	7	7	7	2032	225.4	7.8	15.8	7	CKAP5	76.5	88.2	122.4	85.5	103.1	107.7	106.2	97.2	102.8	110.3
Q14980	Nuclear mitotic apparatus protein 1 [OS=Homo sapiens]	4	7	7	7	2115	238.1	5.78	17.81	7	NUMA1	93.1	88.6	113.4	87.9	100.9	96.4	90	101.4	109.5	118.8
P78371	T-complex protein 1 subunit beta [OS=Homo sapiens]	24	7	7	7	535	57.5	6.46	25.19	7	CCT2	90	92.1	119.4	103.3	91.5	91.8	94.2	110	97.1	110.6
P46778	60S ribosomal protein L21 [OS=Homo sapiens]	36	7	7	7	160	18.6	10.49	12.51	7	RPL21	92.1	100.4	90.9	90.1	98.9	101.8	99.7	108.8	109.7	107.7
Q9UHI6	Probable ATP-dependent RNA helicase DDX20 [OS=Homo sapiens]	10	7	7	7	824	92.2	6.95	19.48	7	DDX20	104.9	78.2	103.4	102.9	103.3	102.9	97.8	96.2	111.8	98.5
P50914	60S ribosomal protein L14 [OS=Homo sapiens]	33	7	12	7	215	23.4	10.93	31.81	7	RPL14	104.9	97.9	83.1	82.3	103.2	101.1	108.3	106.4	108.3	104.4
P62244	40S ribosomal protein S15a [OS=Homo sapiens]	52	7	13	7	130	14.8	10.13	42.7	7	RPS15A	99.3	100.8	93.7	90.3	101.6	102.6	102.7	108	104.9	96.1
Q07020	60S ribosomal protein L18 [OS=Homo sapiens]	36	7	14	7	188	21.6	11.72	48.06	7	RPL18	103.5	101.3	84.2	87	99.7	102.9	108	98.9	106.3	108.1
P62263	40S ribosomal protein S14 [OS=Homo sapiens]	40	7	8	7	151	16.3	10.05	27.09	7	RPS14	98.6	101.1	83.2	86.8	92.2	91.8	144.7	96.2	114.7	90.7
P18621	60S ribosomal protein L17 [OS=Homo sapiens]	35	7	10	7	184	21.4	10.17	33.2	7	RPL17	107.6	106.1	83.1	88.8	97.9	105.6	101.8	104.4	106.4	98.3
P61353	60S ribosomal protein L27 [OS=Homo sapiens]	54	7	7	7	136	15.8	10.56	17.46	7	RPL27	109.6	102.8	82.4	92.1	97.7	107.6	100.9	102.5	104.2	100.2
Q12905	Interleukin enhancer-binding factor 2 [OS=Homo sapiens]	23	7	8	7	390	43	5.26	21.32	7	ILF2	109.1	101.1	87.3	96.4	99.5	105.5	97.7	99.7	104.3	99.4
Q9Y383	Putative RNA-binding protein Luc7-like 2 [OS=Homo sapiens]	17	7	7	3	392	46.5	10.01	10.71	7	LUC7L2	102.3	100.9	100.8	98.8	102.8	104.7	97.7	102.9	101.5	87.6
P62750	60S ribosomal protein L23a [OS=Homo sapiens]	34	7	8	7	156	17.7	10.45	20.31	7	RPL23A	107.8	107	77.8	93.7	99.8	109.2	97.1	101.4	109.6	96.8
P21333	Filamin-A [OS=Homo sapiens]	4	7	7	7	2647	280.6	6.06	19.59	7	FLNA	121.5	104.7	93	112.3	71.5	88.2	85	123	96.8	103.9
Q9NVI7	ATPase family AAA domain-containing protein 3A [OS=Homo sapiens]	12	7	7	7	634	71.3	8.98	21.26	7	ATAD3A	113.9	88.3	112.6	100.1	107.3	89.2	106.2	86.4	86.9	109.1
P26368	Splicing factor U2AF 65 kDa subunit [OS=Homo sapiens]	17	7	7	7	475	53.5	9.09	17.36	7	U2AF2	116.8	96.2	99.2	101.4	99.7	92.7	97.3	101.9	98.7	96.1
P62910	60S ribosomal protein L32 [OS=Homo sapiens]	45	7	9	7	135	15.9	11.33	22.28	7	RPL32	109.6	113.9	86	87.9	99.1	98.7	97.6	107	102.3	97.9
P62899	60S ribosomal protein L31 [OS=Homo sapiens]	40	7	9	7	125	14.5	10.54	25.15	7	RPL31	115.2	107	88.6	90.5	96.2	106.5	97.1	99	103.3	96.6
P49368	T-complex protein 1 subunit gamma [OS=Homo sapiens]	14	7	7	7	545	60.5	6.49	20.43	7	CCT3	108.4	109.6	93.6	106.3	105.9	97.4	100.7	85.4	94.4	98.4
P25398	40S ribosomal protein S12 [OS=Homo sapiens]	54	7	13	7	132	14.5	7.21	41.21	7	RPS12	114.3	114.2	90.7	97.8	95.4	97.2	101.1	99.4	97.3	92.6
Q49A26	Cytokine-like nuclear factor N-PAC [OS=Homo sapiens]	16	7	7	7	553	60.5	9.17	20.6	7	GLYR1	104.5	129.6	88.6	83.8	108.2	89.4	126.3	79.7	80.7	109.2
P46777	60S ribosomal protein L5 [OS=Homo sapiens]	25	7	8	7	297	34.3	9.72	21.4	7	RPL5	130.7	123.3	87.3	86.8	98.7	100.7	95.2	98.3	92.5	86.6
P36969	Phospholipid hydroperoxide glutathione peroxidase [OS=Homo sapiens]	37	8	8	8	197	22.2	8.37	26.86	8	GPX4	5.5	7.2	90.3	97	46.2	53.3	47.9	219.2	233	200.4
P30050	60S ribosomal protein L12 [OS=Homo sapiens]	64	8	11	8	165	17.8	9.42	32.63	8	RPL12	92.2	103.1	84.7	97.2	98.4	93.6	97.3	106.3	111	116
Q9UN86	Ras GTPase-activating protein-binding protein 2 [OS=Homo sapiens]	18	8	10	8	482	54.1	5.55	29.36	8	G3BP2	94.4	102.1	112.8	98.6	93.8	87.6	94.2	106.9	102.2	107.3
Q99459	Cell division cycle 5-like protein [OS=Homo sapiens]	11	8	8	8	802	92.2	8.18	21.82	8	CDC5L	97.6	94.2	97.4	81.8	115.8	83.6	123.8	99	93.3	113.4
Q9UMS4	Pre-mRNA-processing factor 19 [OS=Homo sapiens]	15	8	8	8	504	55.1	6.61	21.58	8	PRPF19	94.9	98.7	100.3	102.5	99.5	93.8	102.9	102.2	100.8	104.3
P32969	60S ribosomal protein L9 [OS=Homo sapiens]	49	8	9	8	192	21.9	9.95	26.07	8	RPL9; RPL9P7; RPL9P8; RPL9P9	101	98.5	87	96.2	95.5	107.5	98	101.1	112.1	103.1
P40429	60S ribosomal protein L13a [OS=Homo sapiens]	30	8	8	8	203	23.6	10.93	21.68	8	RPL13A	101.8	99.6	73.9	79	102.3	104.6	125.2	109.9	100.9	102.7
P62917	60S ribosomal protein L8 [OS=Homo sapiens]	30	8	11	8	257	28	11.03	31.29	8	RPL8	109.8	103.6	91.9	78.5	101.7	96.9	106.6	102.2	100.2	108.7
P62829	60S ribosomal protein L23 [OS=Homo sapiens]	55	8	13	8	140	14.9	10.51	33.06	8	RPL23	115	107.6	87.4	91.5	100	99.4	91.1	103.2	97.9	106.9
Q9BUA3	Spindlin interactor and repressor of chromatin-binding protein [OS=Homo sapiens]	28	8	10	8	381	41	5.01	29.15	8	SPINDOC	92	93.7	129.3	121.3	105.5	102.6	110.2	75.8	82	87.6
Q13283	Ras GTPase-activating protein-binding protein 1 [OS=Homo sapiens]	25	8	10	8	466	52.1	5.52	30.13	8	G3BP1	106.3	127.2	94.5	89.6	99.9	99.2	95.4	97.7	91.5	98.6
Q13151	Heterogeneous nuclear ribonucleoprotein A0 [OS=Homo sapiens]	27	8	12	6	305	30.8	9.29	33.54	8	HNRNPA0	113.5	118.8	95.5	96.9	89.6	98.7	103.1	88.6	94.4	100.9
Q99729	Heterogeneous nuclear ribonucleoprotein A/B [OS=Homo sapiens]	23	8	12	7	332	36.2	8.21	31.42	8	HNRNPAB	126.4	118.1	91.3	92.2	98.5	97.5	97.4	94.5	94.5	89.4
P07910	Heterogeneous nuclear ribonucleoproteins C1/C2 [OS=Homo sapiens]	23	8	8	8	306	33.7	5.08	18.71	8	HNRNPC	131.1	111.1	90	97.9	103.2	94.1	100.4	87.8	83.3	101
P14866	Heterogeneous nuclear ribonucleoprotein L [OS=Homo sapiens]	16	8	11	8	589	64.1	8.22	28.33	8	HNRNPL	137.7	132.9	113	96.4	94	83.4	108.8	74.8	69.9	89.2
P62942	Peptidyl-prolyl cis-trans isomerase FKBP1A [OS=Homo sapiens]	66	8	35	8	108	11.9	8.16	99.64	8	FKBP1A	164.5	163.2	61.8	64.9	107.2	105.6	106.9	78.3	78.9	68.6
Q9HCC0	Methylcrotonoyl-CoA carboxylase beta chain, mitochondrial [OS=Homo sapiens]	22	9	10	9	563	61.3	7.68	27.41	9	MCCC2	30.3	28.1	194.9	218.9	61.7	70.6	32.8	118.2	138.1	106.4
Q15365	Poly(rC)-binding protein 1 [OS=Homo sapiens]	38	9	15	7	356	37.5	7.09	51.36	9	PCBP1	46.7	56.6	104.8	104.1	87.8	78.8	78.5	154.9	157.7	130
Q12789	General transcription factor 3C polypeptide 1 [OS=Homo sapiens]	5	9	9	9	2109	238.7	7.3	25.05	9	GTF3C1	53.5	67	123.9	113.6	98	76.2	153	103.2	102.1	109.5
O00541	Pescadillo homolog [OS=Homo sapiens]	18	9	12	9	588	68	7.33	30.74	9	PES1	89.6	78.5	85.6	84.5	89.3	87	95.1	126.6	124.8	139.1
P62979	Ubiquitin-40S ribosomal protein S27a [OS=Homo sapiens]	58	9	13	9	156	18	9.64	36.46	9	RPS27A	77.7	78.8	134.9	124.3	95.1	92.3	81	103.3	104.7	108
Q9BQ39	ATP-dependent RNA helicase DDX50 [OS=Homo sapiens]	15	9	10	6	737	82.5	9.17	31.16	9	DDX50	75.9	87.1	109.2	98.4	118.5	104.4	111	96.5	92.6	106.3
Q14839	Chromodomain-helicase-DNA-binding protein 4 [OS=Homo sapiens]	6	9	9	9	1912	217.9	5.86	25.43	9	CHD4	88.7	99.1	99	92.2	104.2	100.9	114.6	98.6	91.9	110.8
O95793	Double-stranded RNA-binding protein Staufen homolog 1 [OS=Homo sapiens]	17	9	9	7	577	63.1	9.44	18.73	9	STAU1	97.8	103.4	89.4	102.7	93.6	104.3	95.8	105.6	111	96.4
P62906	60S ribosomal protein L10a [OS=Homo sapiens]	37	9	9	9	217	24.8	9.94	31.32	9	RPL10A	103.9	99.1	76.8	91.3	101.9	109.1	102.2	106.4	109.4	100
O76021	Ribosomal L1 domain-containing protein 1 [OS=Homo sapiens]	18	9	9	9	490	54.9	10.13	21.79	9	RSL1D1	104.8	113.8	73.6	83.5	90.1	105.5	119.2	104.2	94.1	111.2
Q16778	Histone H2B type 2-E [OS=Homo sapiens]	56	9	14	2	126	13.9	10.32	45.5	9	H2BC21	110.5	112.8	88.1	78.6	102.6	95.7	101.9	95.7	101.4	112.7
P26373	60S ribosomal protein L13 [OS=Homo sapiens]	40	9	12	9	211	24.2	11.65	33.85	9	RPL13	102.6	118	86.4	86	101.4	101.4	101	103.2	97.6	102.4
Q5QNW6	Histone H2B type 2-F [OS=Homo sapiens]	56	9	16	2	126	13.9	10.32	52.71	9	H2BC18	115.7	110.5	80.9	87.1	89.4	105.8	100.7	102.5	109.1	98.3
P46782	40S ribosomal protein S5 [OS=Homo sapiens]	32	9	13	9	204	22.9	9.72	43.23	9	RPS5	106.2	115.4	96	88.8	101.7	92.7	97.7	101.5	99.6	100.2
P62269	40S ribosomal protein S18 [OS=Homo sapiens]	44	9	14	9	152	17.7	10.99	37.48	9	RPS18	114.2	111.5	81.1	89.2	93.1	103.5	104	103	106.8	93.5
P51991	Heterogeneous nuclear ribonucleoprotein A3 [OS=Homo sapiens]	25	9	13	7	378	39.6	9.01	35.46	9	HNRNPA3	104.6	113.1	92	99	99.9	101.7	102.2	93.6	87.8	106.2
Q9UQ35	Serine/arginine repetitive matrix protein 2 [OS=Homo sapiens]	4	9	9	9	2752	299.4	12.06	25.41	9	SRRM2	96.6	111.5	88	86	118.8	108.7	117	101.2	81.5	90.7
P18077	60S ribosomal protein L35a [OS=Homo sapiens]	50	9	11	9	110	12.5	11.06	26.06	9	RPL35A	122.6	111.7	82	83.7	102.4	103	100.6	98.4	97.8	97.8
P62753	40S ribosomal protein S6 [OS=Homo sapiens]	37	9	15	9	249	28.7	10.84	46.66	9	RPS6	119.1	112.6	87.6	92.9	95.2	108.9	96.8	100.3	97	89.6
P38159	RNA-binding motif protein, X chromosome [OS=Homo sapiens]	21	9	10	9	391	42.3	10.05	23.84	9	RBMX	116.1	111.2	95.8	97.3	98.6	101.8	112.1	90	82	95.1
P61254	60S ribosomal protein L26 [OS=Homo sapiens]	46	9	12	2	145	17.2	10.55	34.02	9	RPL26	124	123.8	79.5	84.6	97.2	99	107.6	95.6	96.8	91.9
Q86YZ3	Hornerin [OS=Homo sapiens]	11	9	9	9	2850	282.2	10.04	25.6	9	HRNR	106.5	152.2	111.8	118.1	104.8	89.3	96	74.4	70.7	76.2
Q15208	Serine/threonine-protein kinase 38 [OS=Homo sapiens]	21	9	9	7	465	54.2	7.15	22.45	9	STK38	146.7	161.3	67.6	59.5	108.8	100.8	120.1	78.8	74.4	81.9
Q14137	Ribosome biogenesis protein BOP1 [OS=Homo sapiens]	16	10	11	10	746	83.6	6.19	27.6	10	BOP1	43.7	52.7	96.2	78.4	65.1	63.6	68.5	177.3	168.8	185.6
Q9NYU2	UDP-glucose:glycoprotein glucosyltransferase 1 [OS=Homo sapiens]	7	10	11	10	1555	177.1	5.63	30.06	10	UGGT1	37.4	26.8	211.2	179.8	104.8	90.2	77.8	92.1	102.8	77.2
Q8NBS9	Thioredoxin domain-containing protein 5 [OS=Homo sapiens]	26	10	11	10	432	47.6	5.97	31.18	10	TXNDC5	23.6	16.7	363.2	341.5	64.1	56.6	24.3	36.2	36.8	37
O75179	Ankyrin repeat domain-containing protein 17 [OS=Homo sapiens]	4	10	11	5	2603	274.1	6.52	32.24	10	ANKRD17	77.1	75.3	111.9	115.4	99.5	95.6	96	110.9	107.2	111.2
Q96SB4	SRSF protein kinase 1 [OS=Homo sapiens]	18	10	10	10	655	74.3	6.16	27.95	10	SRPK1	90.1	84.8	92.8	96.2	100.4	99.3	103.1	111	117.6	104.7
P27635	60S ribosomal protein L10 [OS=Homo sapiens]	42	10	11	10	214	24.6	10.08	30.08	10	RPL10	97.4	102	96.9	93	101.1	96.6	102	103.1	103.5	104.5
Q9BVP2	Guanine nucleotide-binding protein-like 3 [OS=Homo sapiens]	19	10	13	10	549	62	9.16	40.47	10	GNL3	102.5	103.6	90.7	92.5	103.2	96.4	100.1	102.1	99.7	109.2
P61313	60S ribosomal protein L15 [OS=Homo sapiens]	50	10	13	10	204	24.1	11.62	26.37	10	RPL15	107.8	104.9	82.9	80	109.3	107.1	98.6	104	102.7	102.7
Q9NVP1	ATP-dependent RNA helicase DDX18 [OS=Homo sapiens]	18	10	10	10	670	75.4	9.5	27.71	10	DDX18	101.5	97.2	100.2	79.1	111.7	100.1	133.5	88.7	83.1	104.9
P83731	60S ribosomal protein L24 [OS=Homo sapiens]	43	10	13	10	157	17.8	11.25	38.6	10	RPL24	112.4	110.4	83.4	90	100.4	103	100.8	99.3	101.5	98.9
P62249	40S ribosomal protein S16 [OS=Homo sapiens]	60	10	14	10	146	16.4	10.21	31.51	10	RPS16	111.3	116.1	87.3	84.2	100.8	95.7	99.1	105.2	96.6	103.7
Q9BQG0	Myb-binding protein 1A [OS=Homo sapiens]	9	10	10	10	1328	148.8	9.28	22.73	10	MYBBP1A	109.3	110.9	93.6	81.6	109.3	100.7	107.4	93	89.7	104.6
P31943	Heterogeneous nuclear ribonucleoprotein H [OS=Homo sapiens]	31	10	13	5	449	49.2	6.3	40.28	10	HNRNPH1	102.1	116.2	115.8	98.9	103.2	87.6	96.7	92.4	92.7	94.3
Q14103	Heterogeneous nuclear ribonucleoprotein D0 [OS=Homo sapiens]	28	10	13	8	355	38.4	7.81	40.52	10	HNRNPD	113	125.1	91.4	88.1	103.1	97	110.1	91.9	87	93.2
P62081	40S ribosomal protein S7 [OS=Homo sapiens]	46	10	14	10	194	22.1	10.1	48.29	10	RPS7	116.5	144	83	78.4	99	94.8	96.3	97.1	102	88.9
Q9H857	5'-nucleotidase domain-containing protein 2 [OS=Homo sapiens]	24	11	12	11	520	60.7	6.77	33.17	11	NT5DC2	39.9	38	168.2	153.6	78.6	81.8	68.7	123.7	125.4	122.1
O00571	ATP-dependent RNA helicase DDX3X [OS=Homo sapiens]	20	11	12	10	662	73.2	7.18	32.76	11	DDX3X	90.4	87.1	110	116.3	93.3	96.7	100.5	99.4	101	105.1
P52597	Heterogeneous nuclear ribonucleoprotein F [OS=Homo sapiens]	45	11	16	9	415	45.6	5.58	57.27	11	HNRNPF	94.1	89	126.9	120.1	96.2	95.3	90.7	94.7	94.2	98.8
P05388	60S acidic ribosomal protein P0 [OS=Homo sapiens]	35	11	17	11	317	34.3	5.97	54.18	11	RPLP0	103.7	102.3	82.6	82.2	104.2	108.3	100.8	105.7	108.2	102.1
Q02543	60S ribosomal protein L18a [OS=Homo sapiens]	45	11	13	11	176	20.7	10.71	35.32	11	RPL18A	104.4	105.3	80.8	80.9	106.5	103.5	104.2	105.9	107.5	101
Q15084	Protein disulfide-isomerase A6 [OS=Homo sapiens]	33	11	15	11	440	48.1	5.08	48.53	11	PDIA6	39.1	34.8	314.2	299.1	67.2	83.6	53.2	34	40.8	34
P62277	40S ribosomal protein S13 [OS=Homo sapiens]	54	11	18	11	151	17.2	10.54	50.37	11	RPS13	106.7	103.3	97.9	85.7	104.4	95.2	105.9	97.7	98.8	104.5
P62241	40S ribosomal protein S8 [OS=Homo sapiens]	58	11	18	11	208	24.2	10.32	55.62	11	RPS8	102.2	115.2	78.8	87.7	97.4	113.2	103.6	97.3	103.8	100.7
Q9BQA1	Methylosome protein 50 [OS=Homo sapiens]	30	11	24	11	342	36.7	5.17	75.81	11	WDR77	109.3	108.2	82.9	85	106.2	106.2	123.9	91.5	89.9	96.8
P68133	Actin, alpha skeletal muscle [OS=Homo sapiens]	28	11	15	1	377	42	5.39	35.49	11	ACTA1	122.2	129.9	50.5	73.7	112.9	114.3	130.4	81.2	91.4	93.4
P46783	40S ribosomal protein S10 [OS=Homo sapiens]	57	11	13	11	165	18.9	10.15	31.13	11	RPS10	139.4	135.7	89.6	91.5	96.9	92.5	89.8	91.9	87.9	84.7
Q15029	116 kDa U5 small nuclear ribonucleoprotein component [OS=Homo sapiens]	15	12	14	11	972	109.4	5	41.57	12	EFTUD2	53.8	58.1	135.4	120.3	109.7	94.5	92.5	117.2	103.2	115.4
Q6P2Q9	Pre-mRNA-processing-splicing factor 8 [OS=Homo sapiens]	5	12	12	12	2335	273.4	8.84	26.71	12	PRPF8	88.6	77.1	120.3	121.1	94.4	102.1	97.9	102.4	95.3	100.8
P05141	ADP/ATP translocase 2 [OS=Homo sapiens]	36	12	14	12	298	32.8	9.69	38.19	12	SLC25A5	88.5	95.6	115.1	110.8	100.1	94.1	95	100.5	102.7	97.6
O43390	Heterogeneous nuclear ribonucleoprotein R [OS=Homo sapiens]	20	12	15	5	633	70.9	8.13	42.34	12	HNRNPR	97.4	97.2	104.3	93.2	94.7	102.8	106.4	85	99.2	119.7
P18124	60S ribosomal protein L7 [OS=Homo sapiens]	47	12	29	12	248	29.2	10.65	93.05	12	RPL7	103.6	99.4	96.8	82.1	105.1	99.5	104.2	104.2	102.7	102.4
P15880	40S ribosomal protein S2 [OS=Homo sapiens]	45	12	27	12	293	31.3	10.24	84.33	12	RPS2	103.1	105.1	90.7	90.6	105.2	99.4	101.4	102.7	103	98.7
P62280	40S ribosomal protein S11 [OS=Homo sapiens]	59	12	16	12	158	18.4	10.3	41.5	12	RPS11	112.3	101.2	92.6	91.3	99.3	98.6	100.7	104.3	102.7	97
P39019	40S ribosomal protein S19 [OS=Homo sapiens]	57	12	15	12	145	16.1	10.32	46.49	12	RPS19	119.4	118	85.4	91	91.1	102.2	98.5	99.5	100.6	94.2
P26599	Polypyrimidine tract-binding protein 1 [OS=Homo sapiens]	33	12	12	12	531	57.2	9.17	40.21	12	PTBP1	112.5	110.7	114.1	110.8	103.1	89.2	85.4	88.2	90.1	95.8
Q71U36	Tubulin alpha-1A chain [OS=Homo sapiens]	31	12	15	12	451	50.1	5.06	44.88	12	TUBA1A	116.2	111.9	104.8	106.6	107.9	91.4	91	91.2	92.2	86.8
P16402	Histone H1.3 [OS=Homo sapiens]	36	12	14	2	221	22.3	11.02	44.03	12	H1-3	125	132.8	66.5	80	103.8	112.7	90	107.5	96.1	85.4
P08243	Asparagine synthetase [glutamine-hydrolyzing] [OS=Homo sapiens]	28	13	16	13	561	64.3	6.86	41.04	13	ASNS	16.2	14.6	23.3	21.2	254.1	246.4	233.5	69.9	67.2	53.7
O75643	U5 small nuclear ribonucleoprotein 200 kDa helicase [OS=Homo sapiens]	8	13	13	13	2136	244.4	6.06	32.02	13	SNRNP200	74.3	63.3	142	121.8	93.9	94	89.2	105.9	105.6	110
P06748	Nucleophosmin [OS=Homo sapiens]	42	13	25	13	294	32.6	4.78	75.85	13	NPM1	110.3	111.3	86	89.4	97.2	99.3	105.8	100.1	97.4	103.4
Q8WWY3	U4/U6 small nuclear ribonucleoprotein Prp31 [OS=Homo sapiens]	28	13	15	13	499	55.4	5.78	42	13	PRPF31	117.2	111.5	74.4	75.3	109.7	105.1	118.4	94.4	90.2	104
P10412	Histone H1.4 [OS=Homo sapiens]	41	14	18	2	219	21.9	11.03	55.07	14	H1-4	129.7	119.6	75.5	95.4	94.6	105.5	95.6	98.5	103.2	82.5
P49327	Fatty acid synthase [OS=Homo sapiens]	8	15	15	15	2511	273.3	6.44	40.98	15	FASN	43.6	49.7	142	135.6	92	88.1	84.4	122.7	123.6	118.4
O14654	Insulin receptor substrate 4 [OS=Homo sapiens]	13	15	15	15	1257	133.7	8.44	42.18	15	IRS4	58.4	68.2	122.1	114.1	88.2	85.7	93.1	126.2	112.7	131.3
P30101	Protein disulfide-isomerase A3 [OS=Homo sapiens]	35	15	17	15	505	56.7	6.35	52.19	15	PDIA3	24.9	26.8	301.9	368.4	63.5	68.7	27.7	40.6	40.8	36.8
P38646	Stress-70 protein, mitochondrial [OS=Homo sapiens]	24	15	17	15	679	73.6	6.16	48.82	15	HSPA9	69.8	68.5	155.8	159.7	97.8	93.1	76.6	89	91.5	98.1
P09651	Heterogeneous nuclear ribonucleoprotein A1 [OS=Homo sapiens]	44	15	28	11	372	38.7	9.13	95.97	15	HNRNPA1	111.5	112	99.5	94.6	98.6	93.2	102.1	93.9	94.4	100.4
P16403	Histone H1.2 [OS=Homo sapiens]	39	15	18	4	213	21.4	10.93	54.61	15	H1-2	130	125.8	82.8	96.7	95.1	100	93.8	95.3	94.7	85.8
O75688	Protein phosphatase 1B [OS=Homo sapiens]	40	15	20	15	479	52.6	5.05	60.92	15	PPM1B	148.7	152.1	68.9	65.3	102.4	103.3	114.8	83.3	82.4	78.8
P02538	Keratin, type II cytoskeletal 6A [OS=Homo sapiens]	21	15	18	3	564	60	8	49.92	15	KRT6A	206.3	216.9	65.5	55.4	112	104.1	73.7	27.1	30.4	108.5
P12277	Creatine kinase B-type [OS=Homo sapiens]	57	16	40	16	381	42.6	5.59	138.05	16	CKB	24.3	22.2	22.1	20.1	98.9	97.1	109.1	207.5	210.7	188
P61978	Heterogeneous nuclear ribonucleoprotein K [OS=Homo sapiens]	37	16	19	16	463	50.9	5.54	55.38	16	HNRNPK	90.7	84.8	134.7	138.6	88.4	91.2	91.7	90.2	91.8	97.8
P15924	Desmoplakin [OS=Homo sapiens]	6	16	17	16	2871	331.6	6.81	41.43	16	DSP	96	83.8	147.5	116.3	109.1	94.1	88.3	84.8	81.5	98.7
P62424	60S ribosomal protein L7a [OS=Homo sapiens]	51	16	18	16	266	30	10.61	56.52	16	RPL7A	109.5	106.9	81.8	84.8	102.6	105.6	98.9	103.4	106.8	99.7
O60506	Heterogeneous nuclear ribonucleoprotein Q [OS=Homo sapiens]	26	16	19	9	623	69.6	8.59	48.4	16	SYNCRIP	108.8	115.6	101.1	95.3	97.7	96	101	92.9	93.2	98.4
O43143	ATP-dependent RNA helicase DHX15 [OS=Homo sapiens]	20	16	17	16	795	90.9	7.46	45.59	16	DHX15	107.7	117.5	84.3	87.3	108	116.7	96.6	98.8	84.9	98.1
P43243	Matrin-3 [OS=Homo sapiens]	26	16	18	16	847	94.6	6.25	45.34	16	MATR3	94.8	120.2	122.4	111.3	86.3	95.7	104	87.4	84.9	93
P60709	Actin, cytoplasmic 1 [OS=Homo sapiens]	49	16	21	6	375	41.7	5.48	59.86	16	ACTB	113.2	114.1	69.4	69.3	110.6	107.4	145.3	83.8	84.2	102.7
P23396	40S ribosomal protein S3 [OS=Homo sapiens]	69	17	27	17	243	26.7	9.66	80.25	17	RPS3	97.6	99	94.3	91	99.3	97.1	95.6	110.3	109.5	106.3
Q7L2E3	ATP-dependent RNA helicase DHX30 [OS=Homo sapiens]	15	17	18	17	1194	133.9	8.78	46.58	17	DHX30	97.3	96.8	104.5	95.9	105	96.8	100.2	96.8	94.6	112
Q02878	60S ribosomal protein L6 [OS=Homo sapiens]	55	17	26	17	288	32.7	10.58	78.44	17	RPL6	105.2	103.6	88.1	89.1	101.5	104.2	99.5	104.6	105.9	98.1
P46781	40S ribosomal protein S9 [OS=Homo sapiens]	62	17	20	17	194	22.6	10.65	52.35	17	RPS9	119	111	80.1	82.5	99.9	107.8	97.3	100.8	105	96.6
P07437	Tubulin beta chain [OS=Homo sapiens]	56	17	22	9	444	49.6	4.89	69.24	17	TUBB	104	112.3	109.4	103.6	98.5	93.9	94.9	95.2	93.9	94.3
Q15393	Splicing factor 3B subunit 3 [OS=Homo sapiens]	15	17	17	17	1217	135.5	5.26	42.45	17	SF3B3	105.7	112.4	77.1	66.3	98.9	186.8	94.2	113.7	69.4	75.4
P02533	Keratin, type I cytoskeletal 14 [OS=Homo sapiens]	37	17	20	5	472	51.5	5.16	60.27	17	KRT14	186.8	200.3	95.5	89.7	92.9	86.1	76.5	51.1	43	78.1
Q9C0C9	(E3-independent) E2 ubiquitin-conjugating enzyme [OS=Homo sapiens]	17	18	18	18	1292	141.2	5.12	52.12	18	UBE2O	13.9	22.3	76.5	73.2	55.9	54.9	55.6	215.8	219.4	212.5
Q9P258	Protein RCC2 [OS=Homo sapiens]	32	18	20	18	522	56	8.78	60.29	18	RCC2	22	20.9	69	64.4	46.2	51	55.2	231.4	232.9	206.9
P12532	Creatine kinase U-type, mitochondrial [OS=Homo sapiens]	46	18	37	17	417	47	8.34	118.52	18	CKMT1A; CKMT1B	48.5	44.6	34	30.8	87.4	90.8	103.1	183.2	184.6	193
Q13310	Polyadenylate-binding protein 4 [OS=Homo sapiens]	28	18	19	9	644	70.7	9.26	56.08	18	PABPC4	89	92	118.1	118.9	96	90.7	95.7	98.4	99.9	101.2
P62701	40S ribosomal protein S4, X isoform [OS=Homo sapiens]	61	18	27	18	263	29.6	10.15	85.44	18	RPS4X	106.3	103.6	91	92.5	101.4	101	102.5	103.1	102.5	96.1
Q12906	Interleukin enhancer-binding factor 3 [OS=Homo sapiens]	25	18	19	18	894	95.3	8.76	51.03	18	ILF3	105.1	111.8	85.7	90.7	102.7	106.5	99.9	96	103.1	98.4
Q92841	Probable ATP-dependent RNA helicase DDX17 [OS=Homo sapiens]	30	19	25	12	729	80.2	8.27	66.24	19	DDX17	107	106.6	107.6	109.1	98.7	98.1	96.2	90.4	88	98.3
Q9NZI8	Insulin-like growth factor 2 mRNA-binding protein 1 [OS=Homo sapiens]	35	19	23	16	577	63.4	9.2	59.42	19	IGF2BP1	119.5	110.9	93.6	90	98.7	99.9	100.3	95.9	97.3	93.8
P22626	Heterogeneous nuclear ribonucleoproteins A2/B1 [OS=Homo sapiens]	61	19	27	15	353	37.4	8.95	77.79	19	HNRNPA2B1	107.9	110.2	87.1	90.4	92.8	90.5	158	86.8	87.4	88.8
O75533	Splicing factor 3B subunit 1 [OS=Homo sapiens]	19	19	19	19	1304	145.7	7.09	59.12	19	SF3B1	132.4	124.5	79.6	76.4	103.1	100.8	122.7	80.6	78.7	101.3
P61247	40S ribosomal protein S3a [OS=Homo sapiens]	61	20	29	20	264	29.9	9.73	80.49	20	RPS3A	114.1	108.5	86.7	89.2	100.5	103.5	99.4	101.2	101.9	94.9
P23588	Eukaryotic translation initiation factor 4B [OS=Homo sapiens]	33	20	22	20	611	69.1	5.73	61.19	20	EIF4B	138.9	136.2	80.1	82.5	106.5	104.1	115.8	72.9	78.1	84.9
P39023	60S ribosomal protein L3 [OS=Homo sapiens]	43	21	23	21	403	46.1	10.18	64.59	21	RPL3	104.3	101.4	88.2	86.7	100.8	102.9	106.1	102.5	104.3	102.9
Q13428	Treacle protein [OS=Homo sapiens]	15	21	21	21	1488	152	9.04	52.13	21	TCOF1	126.2	120.2	94	97.3	87.7	95.1	90.6	98.8	98.3	91.8
P35527	Keratin, type I cytoskeletal 9 [OS=Homo sapiens]	43	21	28	20	623	62	5.24	85.37	21	KRT9	141.5	142.8	112.1	108.9	103.4	95.9	92.9	66.9	69.1	66.5
Q13435	Splicing factor 3B subunit 2 [OS=Homo sapiens]	27	22	22	22	895	100.2	5.67	61.3	22	SF3B2	135.5	136.8	83.3	84.3	97.5	101.7	116.9	80.1	78.3	85.6
P13647	Keratin, type II cytoskeletal 5 [OS=Homo sapiens]	33	22	26	11	590	62.3	7.74	76.91	22	KRT5	178	174.2	88.1	90.1	95.6	96.1	81.2	53.8	50	92.8
Q16881	Thioredoxin reductase 1, cytoplasmic [OS=Homo sapiens]	38	23	30	23	649	70.9	7.39	94.7	23	TXNRD1	11.1	13.3	108.7	101.5	103.7	102	101.6	157.9	155.6	144.6
P0DMV9	Heat shock 70 kDa protein 1B [OS=Homo sapiens]	37	23	33	19	641	70	5.66	98.56	23	HSPA1B	96.4	96.2	105.8	113.9	97.3	97.3	91.5	102	102.8	96.8
Q00839	Heterogeneous nuclear ribonucleoprotein U [OS=Homo sapiens]	22	23	28	23	825	90.5	6	80.27	23	HNRNPU	122.8	122.3	83	88.3	101.1	98.4	111.6	90.2	92.2	90.2
P13667	Protein disulfide-isomerase A4 [OS=Homo sapiens]	33	24	29	24	645	72.9	5.07	72.4	24	PDIA4	30.3	15.9	317.9	336.2	65.7	68.5	34.5	42	44.8	44.2
O14744	Protein arginine N-methyltransferase 5 [OS=Homo sapiens]	38	24	35	24	637	72.6	6.29	109.43	24	PRMT5	116.5	116	73.3	82.2	106.1	106.8	110.9	91.2	99	98
P11940	Polyadenylate-binding protein 1 [OS=Homo sapiens]	41	25	27	16	636	70.6	9.5	78	25	PABPC1	93.5	89.2	115.2	114.5	94.2	93.7	96.9	100	103.1	99.7
P36578	60S ribosomal protein L4 [OS=Homo sapiens]	51	25	30	25	427	47.7	11.06	86.12	25	RPL4	104.4	99.4	87.2	88.6	104.9	100.8	102.6	105.3	105.5	101.4
P54886	Delta-1-pyrroline-5-carboxylate synthase [OS=Homo sapiens]	40	26	31	26	795	87.2	7.12	86.61	26	ALDH18A1	44.8	44.3	51.5	49.6	154.7	145.7	174.4	108.1	105.6	121.3
P17844	Probable ATP-dependent RNA helicase DDX5 [OS=Homo sapiens]	51	26	34	19	614	69.1	8.92	93.65	26	DDX5	118.8	114.2	95.7	91	98.6	92.6	106	91.3	90	101.9
Q9NR30	Nucleolar RNA helicase 2 [OS=Homo sapiens]	36	27	32	24	783	87.3	9.28	92.36	27	DDX21	112.3	118.2	80.1	81.2	103.3	105.3	108.8	92.9	93.3	104.6
P52272	Heterogeneous nuclear ribonucleoprotein M [OS=Homo sapiens]	40	28	30	28	730	77.5	8.7	86.08	28	HNRNPM	113.3	113.1	90.9	84	100.3	100.1	105.4	97.5	93.5	101.9
P98175	RNA-binding protein 10 [OS=Homo sapiens]	30	28	32	28	930	103.5	5.97	103.89	28	RBM10	146.1	150	69.6	68.5	103.4	100.8	120	75.5	75.7	90.4
P35908	Keratin, type II cytoskeletal 2 epidermal [OS=Homo sapiens]	50	28	36	21	639	65.4	8	111.02	28	KRT2	161.3	162.4	90.8	97.4	127.6	135.2	79.3	45.7	46.2	54
P11142	Heat shock cognate 71 kDa protein [OS=Homo sapiens]	46	29	40	25	646	70.9	5.52	114.98	29	HSPA8	80.6	83	120.1	123.3	92.4	92.7	85.5	110.5	111.8	100.2
Q08211	ATP-dependent RNA helicase A [OS=Homo sapiens]	26	29	32	29	1270	140.9	6.84	98.56	29	DHX9	106.6	109.7	92.7	86.5	103.9	101.1	103.3	98	96.7	101.6
P13645	Keratin, type I cytoskeletal 10 [OS=Homo sapiens]	50	29	45	25	584	58.8	5.21	136.33	29	KRT10	166.9	158.8	93.2	94.7	121.1	117.7	84.9	48.4	44.2	70
P04264	Keratin, type II cytoskeletal 1 [OS=Homo sapiens]	49	33	65	31	644	66	8.12	208.26	33	KRT1	165	159.7	112.3	110.9	103.8	102.6	82.3	50.9	52.2	60.1
P07237	Protein disulfide-isomerase [OS=Homo sapiens]	60	38	59	38	508	57.1	4.87	168.87	38	P4HB	17.3	10.1	322.1	362.1	61	65.3	24.7	47.5	48.1	41.6
P19338	Nucleolin [OS=Homo sapiens]	43	39	53	39	710	76.6	4.7	151.27	39	NCL	122.1	115.6	79.2	82.2	101.1	100.2	104.6	98.5	100.7	95.9
P52732	Kinesin-like protein KIF11 [OS=Homo sapiens]	40	41	52	41	1056	119.1	5.64	160.08	41	KIF11	157	155.8	59.7	60.7	109.9	111	116.6	76.3	76	77
Q16531	DNA damage-binding protein 1 [OS=Homo sapiens]	46	54	82	54	1140	126.9	5.26	236.33	54	DDB1	23.4	23.6	88.7	92	97.8	100.2	98.5	164.8	167.1	144
