# Supplementary material for: Exploiting the DCAF16–SPIN4 interaction to identify DCAF16 ligands for PROTAC development
Source: Royal Society of Chemistry journal article supplement (doi:10.1039/d4md00681j), 2024-12-06
Supplement: d4md00681j6.xlsx [file d4md00681j6.xlsx]

## Sheet: Summary
TMT tag	Sample
Abundances (Grouped): F1, 126	HEK293T cells, DMSO 2 hours
Abundances (Grouped): F1, 127	HEK293T cells, DMSO 2 hours
Abundances (Grouped): F1, 128	Not used in the study
Abundances (Grouped): F1, 129
Abundances (Grouped): F1, 130	HEK293T cells, 5 µM 2G07-SLF 2 hours
Abundances (Grouped): F1, 131	HEK293T cells, 5 µM 2G07-SLF 2 hours

## Sheet: 2G07-SLF_ABPP
Annotated Sequence	Modifications	Master Protein Accessions	GeneID+Site	Theo. MH+ [Da]	Abundances (Grouped): F1, 126	Abundances (Grouped): F1, 127	Abundances (Grouped): F1, 128	Abundances (Grouped): F1, 129	Abundances (Grouped): F1, 130	Abundances (Grouped): F1, 131
[R].KPNVGCQQDSEELLK.[L]	2xTMT6plex [K1; K15]; 1xTMT6plex [N-Term]; 1xDBIA [C6]	A0AVT1	UBA6_C347	2671.51	120.2	104.1	141.6	90.4	80	63.7
[R].LADFNIYQVSTAEQCR.[S]	1xTMT6plex [N-Term]; 1xDBIA [C15]	A0JNW5	BLT3B_C476	2383.23	114.5	93.9	152.1	96.5	72.8	70.2
[K].GCESAVDELK.[G]	1xTMT6plex [K10]; 1xTMT6plex [N-Term]; 1xDBIA [C2]	A0MZ66	SHOT1_C442	1804.99	116.1	92.4	149.5	93.5	85.5	63
[K].VTFQPPSSIGCR.[K]	1xTMT6plex [N-Term]; 1xDBIA [C11]	A0MZ66	SHOT1_C565	1816.99	122	98.3	150.5	98.6	60.3	70.4
[R].AAVETLGVPCFLGGMAR.[G]	1xTMT6plex [N-Term]; 1xDBIA [C10]	A1L0T0	HACL2_C315	2217.21	102.3	76	126.7	91.9	128.1	75
[K].ADVIVLAGTVCDFR.[L]	1xTMT6plex [N-Term]; 1xDBIA [C11]	A1L0T0	HACL2_C354	2004.11	124	102.5	159.3	74.2	85.5	54.5
[K].VLHDAQQQCR.[D]	1xTMT6plex [N-Term]; 1xDBIA [C9]	A1L0T0	HACL2_C608	1722.93	107.6	103.2	93.7	93.6	102.8	99
[K].NDMGLECGHK.[V]	1xTMT6plex [K10]; 1xTMT6plex [N-Term]; 1xDBIA [C7]	A1X283	SPD2B_C598	1857.97	119.1	94.6	143.7	104.1	64.7	73.7
[R].GPQCEGHESR.[A]	1xTMT6plex [N-Term]; 1xDBIA [C4]	A1X283	SPD2B_C783	1624.81	99.1	96.8	158.2	98.2	86	61.8
[R].ELCPLK.[T]	1xTMT6plex [K6]; 1xTMT6plex [N-Term]; 1xDBIA [C3]	A2VDJ0	T131L_C1105	1456.9	112.7	95	129.7	92.8	93.5	76.4
[K].LGHILVVDEADKAPTNVTCILK.[T]	2xTMT6plex [K12; K22]; 1xTMT6plex [N-Term]; 1xDBIA [C19]	A3KMH1	VWA8_C858	3332.96	106.9	72	111	108.7	116	85.4
[R].LGDSELAMVCSQR.[N]	1xTMT6plex [N-Term]; 1xDBIA [C10]	A4D1P6	WDR91_C246	1934	115.7	94.4	136.9	104.8	76	72.2
[R].VPPLSLGYGVCPEPPSPGPALVK.[L]	1xTMT6plex [K23]; 1xTMT6plex [N-Term]; 1xDBIA [C11]	A4D1S0	KLRG2_C90	3028.73	108.8	94.7	145.1	103.8	78.7	68.9
[K].LFQSVAQCCMGQK.[Q]	1xCarbamidomethyl [C9]; 1xTMT6plex [K13]; 1xTMT6plex [N-Term]; 1xDBIA [C8]	A5YKK6	CNOT1_C2359	2254.19	112	101.8	148.7	103.2	70.1	64.2
[K].NNQESDCVSK.[K]	1xTMT6plex [K10]; 1xTMT6plex [N-Term]; 1xDBIA [C7]	A6NDG6	PGP_C297	1877.98	119.6	101	144.2	96.2	70.5	68.5
[R].CPIQLNEGVSFQDLDTAK.[L]	1xTMT6plex [K18]; 1xTMT6plex [N-Term]; 1xDBIA [C1]	A6NDU8	RIMC1_C179	2732.47	120.7	96.9	142.7	105.3	69.8	64.7
[R].ETYPDDPCFPSK.[L]	1xTMT6plex [K12]; 1xTMT6plex [N-Term]; 1xDBIA [C8]	A6NHR9	SMHD1_C444	2153.1	105.7	83.5	146.6	96.2	92.4	75.6
[R].ACVCQTLGISPEEK.[F]	1xCarbamidomethyl [C4]; 1xTMT6plex [K14]; 1xTMT6plex [N-Term]; 1xDBIA [C2]	A6NHR9	SMHD1_C59	2289.23	98.8	87.9	129.4	103.6	103.4	76.9
[K].GPVNSCQGK.[N]	1xTMT6plex [K9]; 1xTMT6plex [N-Term]; 1xDBIA [C6]	A6NHR9	SMHD1_C897	1643.93	96.9	84.9	164	93.4	91.5	69.3
[K].LIVHCK.[F]	1xTMT6plex [K6]; 1xTMT6plex [N-Term]; 1xDBIA [C5]	A6NHR9	SMHD1_C970	1466.93	106.7	89.1	155.2	91.7	78.9	78.3
[R].ELCCFLDDDRQK.[G]	1xCarbamidomethyl [C3]; 1xTMT6plex [K12]; 1xTMT6plex [N-Term]; 1xDBIA [C4]	A6NKD9	CC85C_C89	2296.18	112.2	96.1	123.9	111.8	78.9	77.1
[K].SDILSLEEILAEGTDLAETAPPPLCASR.[N]	1xTMT6plex [N-Term]; 1xDBIA [C25]	A6QL63	ABTB3_C783	3436.81	106.1	71.3	121.5	95.4	132.6	73
[K].AVHMEACSGQLEK.[A]	1xTMT6plex [K13]; 1xTMT6plex [N-Term]; 1xDBIA [C7]	A8K855	EFCB7_C524	2157.16	93.4	95.2	126.2	97.3	109.6	78.4
[K].AFNQCSNLTTHK.[K]	1xTMT6plex [K12]; 1xTMT6plex [N-Term]; 1xDBIA [C5]	A8MTY0	ZN724_C602	2118.15	108.4	72.8	145	96.6	91.5	85.7
[K].TGHDDTAPCAILK.[S]	1xTMT6plex [K13]; 1xTMT6plex [N-Term]; 1xDBIA [C9]	B2RTY4	MYO9A_C735	2096.16	105.4	93.1	138	104.4	87.3	71.8
[K].LALGSFFDDGPGIYTSCSK.[S]	1xTMT6plex [K19]; 1xTMT6plex [N-Term]; 1xDBIA [C17]	B3KU38	IQIP1_C358	2732.44	135.3	105.6	150.7	96.6	51.3	60.6
[K].NQDCSK.[G]	1xTMT6plex [K6]; 1xTMT6plex [N-Term]; 1xDBIA [C4]	O00139	KIF2A_C334	1448.79	121.9	94.6	123.5	82.1	104.3	73.7
[K].CVEDVLK.[L]	1xTMT6plex [K7]; 1xTMT6plex [N-Term]; 1xDBIA [C1]	O00139	KIF2A_C406	1559.92	121.8	87.9	143.7	102.5	73.8	70.3
[K].AALANLCIGDVITAIDGENTSNMTHLEAQNR.[I]	1xTMT6plex [N-Term]; 1xDBIA [C7]	O00151	PDLI1_C45	3780.92	97.5	103.9	128.1	94.6	111.6	64.3
[K].GCTDNLTLTVAR.[S]	1xTMT6plex [N-Term]; 1xDBIA [C2]	O00151	PDLI1_C73	1788.98	122.4	93.3	163	91.3	73.5	56.5
[K].TTWGDGGENSPCNVVSK.[Q]	1xTMT6plex [K17]; 1xTMT6plex [N-Term]; 1xDBIA [C12]	O00161	SNP23_C112	2505.28	133.6	105.9	171.1	88.8	55.7	44.8
[R].MCPIFQISNVTGENLDLLK.[M]	1xTMT6plex [K19]; 1xTMT6plex [N-Term]; 1xDBIA [C2]	O00178	GTPB1_C360	2889.6	126.5	91.6	151.3	91.2	65.7	73.8
[K].SVDCFLHDFASK.[S]	1xTMT6plex [K12]; 1xTMT6plex [N-Term]; 1xDBIA [C4]	O00186	STXB3_C90	2123.14	105.1	84.6	162.5	93.3	79.4	75.2
[R].QPCIFGDK.[M]	1xTMT6plex [K8]; 1xTMT6plex [N-Term]; 1xDBIA [C3]	O00203	AP3B1_C893	1661.94	116.6	95.1	158.3	97.1	65.7	67.2
[K].CVAQASK.[N]	1xTMT6plex [K7]; 1xTMT6plex [N-Term]; 1xDBIA [C1]	O00231	PSD11_C289	1460.87	115.3	95.5	146.6	109.8	62.8	69.9
[R].AIYDTPCIQAESEK.[W]	1xTMT6plex [K14]; 1xTMT6plex [N-Term]; 1xDBIA [C7]	O00232	PSD12_C255	2322.24	100.3	91.2	113.2	82.5	138.5	74.3
[K].GLLGCNIIPLQR.[-]	1xTMT6plex [N-Term]; 1xDBIA [C5]	O00233	PSMD9_C216	1822.09	129.9	98.5	147.1	94.8	62.6	67
[K].GIGMNEPLVDCEGYPR.[S]	1xTMT6plex [N-Term]; 1xDBIA [C11]	O00233	PSMD9_C59	2275.14	106.9	99.4	130	91.1	100.4	72.3
[K].GIGMNEPLVDCEGYPR.[S]	1xOxidation [M4]; 1xTMT6plex [N-Term]; 1xDBIA [C11]	O00233	PSMD9_C59	2291.14	88	103	158	90.2	92.3	68.5
[K].HEFSVDMTCGGCAEAVSR.[V]	1xCarbamidomethyl [C12]; 1xTMT6plex [N-Term]; 1xDBIA [C9]	O00244	ATOX1_C12	2481.15	96.9	107.2	188.1	88.2	65.2	54.5
[R].SFAFLHCK.[K]	1xTMT6plex [K8]; 1xTMT6plex [N-Term]; 1xDBIA [C7]	O00267	SPT5H_C626	1706.98	106.6	99.3	158	85.5	82	68.6
[R].VELHSTCQTISVDR.[Q]	1xTMT6plex [N-Term]; 1xDBIA [C7]	O00267	SPT5H_C740	2113.13	91	80.2	116	101.2	133.6	78
[R].EQHGVAASCLEDLR.[S]	1xTMT6plex [N-Term]; 1xDBIA [C9]	O00273	DFFA_C38	2053.07	91.7	92.6	123.2	106.1	113.5	72.9
[K].SLTPVTLVLAEDGTIVDDDDYFLCLPSNTK.[F]	1xTMT6plex [K30]; 1xTMT6plex [N-Term]; 1xDBIA [C24]	O00273	DFFA_C78	4009.11	102.6	98.1	106.6	83.4	123	86.2
[K].IGNCPFSQR.[L]	1xTMT6plex [N-Term]; 1xDBIA [C4]	O00299	CLIC1_C24	1546.84	138.5	92.6	145.5	87.5	75.6	60.3
[K].LCPGGQLPFLLYGTEVHTDTNK.[I]	1xTMT6plex [K22]; 1xTMT6plex [N-Term]; 1xDBIA [C2]	O00299	CLIC1_C59	3157.71	126.1	100.7	146	92.1	66	69.2
[R].GYFHTFAGDTCQVALNFANEEEAK.[K]	1xTMT6plex [K24]; 1xTMT6plex [N-Term]; 1xDBIA [C11]	O00401	WASL_C115	3416.7	97.8	89.2	130.1	94.8	109.1	79
[K].VEQNSRPVSCSGR.[D]	1xTMT6plex [N-Term]; 1xDBIA [C10]	O00401	WASL_C431	1944.03	140.1	80.1	177.1	92.7	57	53
[K].HEDPCAK.[R]	1xTMT6plex [K7]; 1xTMT6plex [N-Term]; 1xDBIA [C5]	O00410	IPO5_C1057	1553.85	120.8	90.6	147.3	89.9	78	73.4
[R].VQAHAAAALINFTEDCPK.[S]	1xTMT6plex [K18]; 1xTMT6plex [N-Term]; 1xDBIA [C16]	O00410	IPO5_C473	2653.45	110.9	90.3	133	94.8	96.5	74.4
[R].VAAAESMPLLLECAR.[V]	1xTMT6plex [N-Term]; 1xDBIA [C13]	O00410	IPO5_C733	2099.16	111.1	92.7	134.6	94.9	92.3	74.4
[K].DATPVPCGR.[W]	1xTMT6plex [N-Term]; 1xDBIA [C7]	O00411	RPOM_C119	1440.78	104.3	77.5	156.8	92.4	96.9	72.1
[K].TLQCLFEK.[Q]	1xTMT6plex [K8]; 1xTMT6plex [N-Term]; 1xDBIA [C4]	O00411	RPOM_C398	1736.02	96.2	79.4	121.7	97.5	116.4	88.7
[R].VCVVSVEKPTLPSK.[E]	2xTMT6plex [K8; K14]; 1xTMT6plex [N-Term]; 1xDBIA [C2]	O00411	RPOM_C413	2469.51	109.1	83.2	122.9	92.6	109.8	82.6
[K].LLAEMLVQATQMPCSLDKPHR.[S]	1xTMT6plex [K18]; 1xTMT6plex [N-Term]; 1xDBIA [C14]	O00411	RPOM_C591	3135.72	79.7	80.9	109.1	87.4	151.1	91.7
[K].GCPQLGVPAPPSEAPQPPEAHLPHSAAPAR.[K]	1xTMT6plex [N-Term]; 1xDBIA [C2]	O00411	RPOM_C726	3504.84	84.8	93.6	130.2	84.6	130.5	76.3
[R].ELAHCQK.[V]	1xTMT6plex [K7]; 1xTMT6plex [N-Term]; 1xDBIA [C5]	O00411	RPOM_C765	1582.91	87.6	84.8	132.7	100	106.4	88.4
[R].LPECGSGDGSLQPPRK.[V]	1xTMT6plex [K16]; 1xTMT6plex [N-Term]; 1xDBIA [C4]	O00411	RPOM_C94	2395.32	98.8	88.9	120.6	95.5	115.9	80.3
[K].GNVETCAK.[A]	1xTMT6plex [K8]; 1xTMT6plex [N-Term]; 1xDBIA [C6]	O00425	IF2B3_C336	1575.89	110.9	85.2	141.3	107.7	83	72
[R].ICYIFHETFGR.[T]	1xTMT6plex [N-Term]; 1xDBIA [C2]	O00429	DNM1L_C367	1911.01	103.4	100.4	177.8	92.1	61.4	64.9
[K].LHDAIVEVVTCLLR.[K]	1xTMT6plex [N-Term]; 1xDBIA [C11]	O00429	DNM1L_C470	2106.23	106.3	97.1	123.3	111.5	88.2	73.5
[R].LQLLTFSAMCQNLAR.[T]	1xTMT6plex [N-Term]; 1xDBIA [C10]	O00443	P3C2A_C514	2234.24	110	90.2	120	95.4	107.3	77.2
[K].HLYQIEKPCK.[E]	2xTMT6plex [K7; K10]; 1xTMT6plex [N-Term]; 1xDBIA [C9]	O00443	P3C2A_C541	2242.33	109.2	82.1	146.3	95.3	89	78
[K].DEQFEQCVQNFNK.[Q]	1xTMT6plex [K13]; 1xTMT6plex [N-Term]; 1xDBIA [C7]	O00499	BIN1_C47	2383.21	98	85.8	135.6	99.6	99.1	81.9
[K].AGEGTYALDSESCMEK.[L]	1xTMT6plex [K16]; 1xTMT6plex [N-Term]; 1xDBIA [C13]	O00541	PESC_C272	2445.2	89.2	78	109.2	91.9	153.2	78.5
[K].SLCIGATYDVTDSR.[I]	1xTMT6plex [N-Term]; 1xDBIA [C3]	O00541	PESC_C361	2026.05	107.9	91.3	147.9	94.6	85.3	73.1
[R].CYVQPQWVFDSVNAR.[L]	1xTMT6plex [N-Term]; 1xDBIA [C1]	O00541	PESC_C391	2337.2	104.4	74.4	166.4	90.6	84.8	79.4
[K].GLTDLSACK.[A]	1xTMT6plex [K9]; 1xTMT6plex [N-Term]; 1xDBIA [C8]	O00567	NOP56_C142	1661.97	90.4	80.9	132.6	82.6	135	78.4
[R].IDCFSEVPTSVFGEK.[L]	1xTMT6plex [K15]; 1xTMT6plex [N-Term]; 1xDBIA [C3]	O00567	NOP56_C384	2412.29	124.7	82.4	160	86.3	77.9	68.7
[K].RDLMACAQTGSGK.[T]	1xTMT6plex [K13]; 1xTMT6plex [N-Term]; 1xDBIA [C6]	O00571	DDX3X_C223	2092.14	120.4	89	158.8	96.2	65.9	69.7
[R].DLMACAQTGSGK.[T]	1xTMT6plex [K12]; 1xTMT6plex [N-Term]; 1xDBIA [C5]	O00571	DDX3X_C223	1936.04	119.5	90.5	138.4	104.7	76.8	70
[K].DQVAYLIQQNVIPPFCNLLTVK.[D]	1xTMT6plex [K22]; 1xTMT6plex [N-Term]; 1xDBIA [C16]	O00629	IMA3_C417	3270.87	108	85.1	114.5	92.4	121.9	78.1
[K].GAFCDLVWSDPEDVDTWAISPR.[G]	1xTMT6plex [N-Term]; 1xDBIA [C4]	O00743	PPP6_C192	3004.47	121.5	94.8	170.7	91.5	53.1	68.4
[R].TIQCAK.[A]	1xTMT6plex [K6]; 1xTMT6plex [N-Term]; 1xDBIA [C4]	O00764	PDXK_C273	1417.86	128.9	82	153.1	99.3	67.4	69.2
[R].LQMPVLGMTPADDFCQGTK.[A]	1xTMT6plex [K19]; 1xTMT6plex [N-Term]; 1xDBIA [C15]	O14531	DPYL4_C90	2806.47	124	110.6	138.4	88.5	67.1	71.3
[K].SDMETHMAAEHCQVTCK.[C]	1xCarbamidomethyl [C16]; 1xTMT6plex [K17]; 1xTMT6plex [N-Term]; 1xDBIA [C12]	O14545	TRAD1_C60	2732.3	99.5	84.5	125.7	87.5	127.3	75.6
[K].CSDSTLLSNLLEEMK.[A]	1xTMT6plex [K15]; 1xTMT6plex [N-Term]; 1xDBIA [C1]	O14617	AP3D1_C1133	2437.31	132	90.3	146.8	101.7	60.2	69
[R].ASCILQLVK.[H]	1xTMT6plex [K9]; 1xTMT6plex [N-Term]; 1xDBIA [C3]	O14617	AP3D1_C574	1729.08	126.7	101.1	164.2	89.3	60.5	58.3
[K].ANAVCK.[L]	1xTMT6plex [K6]; 1xTMT6plex [N-Term]; 1xDBIA [C5]	O14617	AP3D1_C60	1359.82	123.1	99.6	161.5	98.5	50.5	66.8
[R].GYGNCGLDNLYLR.[K]	1xTMT6plex [N-Term]; 1xDBIA [C5]	O14628	ZN195_C178	1983.03	92.4	103.8	171.8	95.5	62.7	73.8
[K].SAAGYPDYYCK.[W]	1xTMT6plex [K11]; 1xTMT6plex [N-Term]; 1xDBIA [C10]	O14646	CHD1_C411	1992.03	105.8	80.6	146.1	93.7	91	82.9
[K].GNSCILADEMGLGK.[T]	1xTMT6plex [K14]; 1xTMT6plex [N-Term]; 1xDBIA [C4]	O14646	CHD1_C502	2162.17	117.5	87.9	152.8	89.5	83.5	68.8
[R].KPAPSNEPEYLCK.[W]	2xTMT6plex [K1; K13]; 1xTMT6plex [N-Term]; 1xDBIA [C12]	O14647	CHD2_C415	2459.39	106.1	85.1	151.4	108.4	77.6	71.4
[K].QVHEIQSCMGR.[L]	1xTMT6plex [N-Term]; 1xDBIA [C8]	O14653	GOSR2_C18	1812.94	92	83.1	139.9	99.5	110	75.5
[R].ALCADEYR.[A]	1xTMT6plex [N-Term]; 1xDBIA [C3]	O14654	IRS4_C332	1465.77	125.1	90.9	159.8	99.2	70.9	54.2
[R].SRFEQFCHLR.[A]	1xTMT6plex [N-Term]; 1xDBIA [C7]	O14654	IRS4_C381	1847.99	121.3	90.5	182.7	88.4	61.9	55.1
[R].FEQFCHLR.[A]	1xTMT6plex [N-Term]; 1xDBIA [C5]	O14654	IRS4_C381	1604.86	122.2	88.9	173.9	96	61.5	57.6
[R].GSGGGQGSNGQGSSSHSSGGNQCSGEGQGSR.[G]	1xTMT6plex [N-Term]; 1xDBIA [C23]	O14654	IRS4_C522	3277.44	102.6	99	152.6	97	83.7	65.1
[R].GGQGSNGQGSGGNQCSR.[D]	1xTMT6plex [N-Term]; 1xDBIA [C15]	O14654	IRS4_C545	2075.98	138.2	93.5	178.3	93	52.4	44.6
[R].LYFCVDR.[G]	1xTMT6plex [N-Term]; 1xDBIA [C4]	O14654	IRS4_C658	1440.79	157	88.5	208.8	78.2	27.5	40
[K].DSIWGICTISK.[L]	1xTMT6plex [K11]; 1xTMT6plex [N-Term]; 1xDBIA [C7]	O14681	EI24_C24	1977.12	128.1	92.2	166.6	86.1	62.2	64.8
[R].SVAEQHTPVCSR.[F]	1xTMT6plex [N-Term]; 1xDBIA [C10]	O14686	KMT2D_C369	1838.97	101.2	97.4	131.2	104.4	87.7	78
[R].YALLLDIVQPTCR.[R]	1xTMT6plex [N-Term]; 1xDBIA [C12]	O14717	TRDMT_C287	2030.17	115.6	102	164.4	90	63.9	64.1
[K].CPWAIPQNTISCSLADVMSEQLAK.[E]	1xCarbamidomethyl [C12]; 1xTMT6plex [K24]; 1xTMT6plex [N-Term]; 1xDBIA [C1]	O14730	RIOK3_C22	3416.78	129.8	91.3	178.6	93.9	46.5	59.9
[R].YQAEINDLENLGEMGSGTCGQVWK.[M]	1xTMT6plex [K24]; 1xTMT6plex [N-Term]; 1xDBIA [C19]	O14733	MP2K7_C131	3396.7	116.4	94.2	157	107.3	63.7	61.3
[K].LCDFGISGR.[L]	1xTMT6plex [N-Term]; 1xDBIA [C2]	O14733	MP2K7_C260	1492.81	134.1	88.6	183.3	94.8	46.9	52.3
[K].EFCSYLQYLEYLSQNRPPPNAYELFAK.[G]	1xTMT6plex [K27]; 1xTMT6plex [N-Term]; 1xDBIA [C3]	O14744	ANM5_C278	4038.09	119.2	100.8	138	84.9	85.9	71.2
[K].LVQGISFSQPTCPDHMLLNSQLLGTPGSSQNPWQR.[L]	1xTMT6plex [N-Term]; 1xDBIA [C12]	O14757	CHK1_C349	4362.23	113.9	95.2	117.5	116.9	87.3	69.2
[R].YISCLK.[G]	1xTMT6plex [K6]; 1xTMT6plex [N-Term]; 1xDBIA [C4]	O14770	MEIS2_C178	1480.9	93.8	99.2	199.1	89.7	57.3	60.8
[R].VPLPGMPIPLPGVAMMQIVSCPYVK.[T]	1xTMT6plex [K25]; 1xTMT6plex [N-Term]; 1xDBIA [C21]	O14776	TCRG1_C388	3391.91	111.9	104.9	131.1	102.3	84.1	65.7
[K].AKPVATAPIPGTPWCVVWTGDER.[V]	1xTMT6plex [K2]; 1xTMT6plex [N-Term]; 1xDBIA [C15]	O14776	TCRG1_C535	3205.76	105.9	83.3	145.2	91.8	98.7	75
[K].DSVCGVSECIIMGIPMNIGTGLFK.[L]	1xCarbamidomethyl [C9]; 1xTMT6plex [K24]; 1xTMT6plex [N-Term]; 1xDBIA [C4]	O14802	RPC1_C1341	3295.73	119.6	95	155	98.1	67.9	64.4
[K].GSFINISQMIACVGQQAISGSR.[V]	1xTMT6plex [N-Term]; 1xDBIA [C12]	O14802	RPC1_C798	2792.47	97	93.8	166	106.8	81	55.4
[K].SEFLCCQDSFLQEIK.[K]	1xCarbamidomethyl [C6]; 1xTMT6plex [K15]; 1xTMT6plex [N-Term]; 1xDBIA [C5]	O14802	RPC1_C960	2601.35	109.9	88.2	129.2	105.5	92.1	75.1
[K].VEYPIMYSTDPENGHIFNCIQR.[A]	1xTMT6plex [N-Term]; 1xDBIA [C19]	O14880	MGST3_C56	3151.55	188.8	120	100.2	65.7	74.1	51.3
[K].LCADGAVGPATNESPGIDYVQIGFPPLLSIVSR.[M]	1xTMT6plex [N-Term]; 1xDBIA [C2]	O14893	GEMI2_C154	3882.07	107.6	70.8	134.6	108.3	107.6	71.2
[R].LLPVEPCDLTEGFDPSVPPR.[T]	1xTMT6plex [N-Term]; 1xDBIA [C7]	O14893	GEMI2_C34	2706.44	86.5	72.8	99.4	90.7	167.6	83
[K].ELDQGSLCTSFVGTLQYLAPELLEQQK.[Y]	1xTMT6plex [K27]; 1xTMT6plex [N-Term]; 1xDBIA [C8]	O14920	IKKB_C179	3765.02	100.3	89.2	137.7	81.9	120.1	70.8
[K].LCQDLPCFSR.[E]	1xCarbamidomethyl [C2]; 1xTMT6plex [N-Term]; 1xDBIA [C7]	O14929	HAT1_C299	1763.91	124.6	92.8	158.1	91.4	57.7	75.4
[R].APDWVDAEECHR.[C]	1xTMT6plex [N-Term]; 1xDBIA [C10]	O14964	HGS_C166	1952.95	96.1	93.8	118.9	97.2	113.3	80.7
[R].TTLCGTLDYLPPEMIEGR.[M]	1xTMT6plex [N-Term]; 1xDBIA [C4]	O14965	AURKA_C290	2534.32	118.5	95.4	121.9	97.8	82.4	84
[R].VLVTQQFPCQNPLPVNSGQAQR.[V]	1xTMT6plex [N-Term]; 1xDBIA [C9]	O14965	AURKA_C33	2949.59	125.8	117	142.4	105.9	56.7	52.2
[K].ACTQPRPNYASNFSVIGAR.[E]	1xTMT6plex [N-Term]; 1xDBIA [C2]	O14976	GAK_C1142	2577.36	138.9	99.5	158.5	94.1	45.9	63.1
[K].LCDFGSATTISHYPDYSWSAQR.[R]	1xTMT6plex [N-Term]; 1xDBIA [C2]	O14976	GAK_C190	3030.46	105.4	92.6	175.6	90.3	65.1	70.9
[R].AIIQEVCFMK.[K]	1xTMT6plex [K10]; 1xTMT6plex [N-Term]; 1xDBIA [C7]	O14976	GAK_C87	1936.12	130.9	97	168	94.5	53.4	56.2
[R].AIIQEVCFMK.[K]	1xOxidation [M9]; 1xTMT6plex [K10]; 1xTMT6plex [N-Term]; 1xDBIA [C7]	O14976	GAK_C87	1952.11	111.7	93.9	164.7	93.8	61.6	74.1
[K].RQMSVPGIFNPHEIPEEMCD.[-]	1xTMT6plex [N-Term]; 1xDBIA [C19]	O14980	XPO1_C1070	2854.39	100	95.1	102.4	89.8	137.7	74.9
[R].QMSVPGIFNPHEIPEEMCD.[-]	1xTMT6plex [N-Term]; 1xDBIA [C18]	O14980	XPO1_C1070	2698.29	94.8	76.5	116.4	91.1	141.9	79.3
[K].LDINLLDNVVNCLYHGEGAQQR.[M]	1xTMT6plex [N-Term]; 1xDBIA [C12]	O14980	XPO1_C34	3009.58	104	84.5	124.3	96.1	111.6	79.6
[K].DLLGLCEQK.[R]	1xTMT6plex [K9]; 1xTMT6plex [N-Term]; 1xDBIA [C6]	O14980	XPO1_C528	1773.03	112.4	84.6	129.6	92	110.7	70.7
[K].CLSENISAAIQANGEMVTK.[Q]	1xTMT6plex [K19]; 1xTMT6plex [N-Term]; 1xDBIA [C1]	O14980	XPO1_C723	2733.47	132.4	92.2	120.3	96.1	77.4	81.5
[R].AADCCR.[I]	1xCarbamidomethyl [C5]; 1xTMT6plex [N-Term]; 1xDBIA [C4]	O15013	ARHGA_C808	1220.61	130.7	98.1	164.5	91.9	54	60.8
[R].SAELGCTVDEVESLIK.[R]	1xTMT6plex [K16]; 1xTMT6plex [N-Term]; 1xDBIA [C6]	O15020	SPTN2_C2043	2447.35	93.7	80.6	103.5	101.8	137.2	83.1
[R].MPAASTCCGDEK.[W]	1xCarbamidomethyl [C8]; 1xTMT6plex [K12]; 1xTMT6plex [N-Term]; 1xDBIA [C7]	O15027	SC16A_C1692	2024	116.7	103.7	146.2	91.3	74.9	67.2
[R].ANNNAAVAPTTCPLQPVTDPFAFSR.[Q]	1xTMT6plex [N-Term]; 1xDBIA [C12]	O15027	SC16A_C46	3127.62	107.1	103.7	120.9	96.5	120.5	51.3
[K].EEIALGGGGFCVHR.[E]	1xTMT6plex [N-Term]; 1xDBIA [C11]	O15037	KHNYN_C320	1970.05	121.2	114.3	159	99.3	47.5	58.7
[K].DCPDNPHIWLQLEGPK.[E]	1xTMT6plex [K16]; 1xTMT6plex [N-Term]; 1xDBIA [C2]	O15037	KHNYN_C46	2616.4	104.4	90.8	165.5	104.1	67.9	67.2
[R].NCGFVAFMNR.[R]	1xTMT6plex [N-Term]; 1xDBIA [C2]	O15042	SR140_C320	1683.87	111.4	85.2	134.6	116.3	77.1	75.5
[K].LCQIFSDLNATYR.[T]	1xTMT6plex [N-Term]; 1xDBIA [C2]	O15042	SR140_C624	2069.11	124.2	83.3	168.2	89.4	70.4	64.5
[R].ESLCDSPHQNLSRPLLENK.[L]	1xTMT6plex [K19]; 1xTMT6plex [N-Term]; 1xDBIA [C4]	O15042	SR140_C65	2934.59	84.5	94.9	133.9	97.3	112.3	77.1
[K].DECTPTR.[K]	1xTMT6plex [N-Term]; 1xDBIA [C3]	O15042	SR140_C918	1346.69	114	59.1	120.8	110.2	115.5	80.3
[K].YLDVCPVSAR.[Q]	1xTMT6plex [N-Term]; 1xDBIA [C5]	O15047	SET1A_C1514	1647.91	119.9	81	142.4	104.5	80.9	71.3
[R].GLAPLHWADDDGNPTEQYPLNPNGSPGGVAGICSCDGR.[H]	1xCarbamidomethyl [C33]; 1xTMT6plex [N-Term]; 1xDBIA [C35]	O15067	PUR4_C1287	4433.09	112.2	95.7	156.2	83.8	84.5	67.6
[R].ACVEAPK.[G]	1xTMT6plex [K7]; 1xTMT6plex [N-Term]; 1xDBIA [C2]	O15067	PUR4_C502	1471.87	108.7	105.2	170.7	86	67.3	62
[K].GNPICSLHDQGAGGNGNVLK.[E]	1xTMT6plex [K20]; 1xTMT6plex [N-Term]; 1xDBIA [C5]	O15067	PUR4_C512	2705.46	92	97.8	173.3	102.1	73.6	61.3
[R].IVLVDDRECPVR.[R]	1xTMT6plex [N-Term]; 1xDBIA [C9]	O15067	PUR4_C606	1939.1	113.8	100.3	130.3	99.4	88.4	67.7
[K].LMWLFGCPLLLDDVAR.[E]	1xTMT6plex [N-Term]; 1xDBIA [C7]	O15067	PUR4_C66	2387.32	111.4	89.7	129.5	104.2	80.7	84.5
[K].ACLPDAK.[T]	1xTMT6plex [K7]; 1xTMT6plex [N-Term]; 1xDBIA [C2]	O15091	MRPP3_C507	1471.87	85.2	73.2	142.7	101.1	118.4	79.4
[R].KPASQCVLDGVR.[G]	1xTMT6plex [K1]; 1xTMT6plex [N-Term]; 1xDBIA [C6]	O15111	IKKA_C371	2027.18	120.3	95.4	155	95.7	59.6	74
[R].GCDSYMVYLFDK.[S]	1xTMT6plex [K12]; 1xTMT6plex [N-Term]; 1xDBIA [C2]	O15111	IKKA_C379	2195.13	123.5	98.3	165.8	99.2	55.5	57.7
[R].SLSDCVNYIVQDSK.[I]	1xTMT6plex [K14]; 1xTMT6plex [N-Term]; 1xDBIA [C5]	O15111	IKKA_C406	2325.25	121.2	92.3	142.1	96.3	83.5	64.6
[K].WWTCFVK.[R]	1xTMT6plex [K7]; 1xTMT6plex [N-Term]; 1xDBIA [C4]	O15145	ARPC3_C162	1723.98	135.2	108.9	169.1	84.1	45.9	56.9
[K].AFGSPMIDLSSPVGGSYNLPSLPDIDCSSTIMLDNIVR.[K]	1xOxidation [M32]; 1xTMT6plex [N-Term]; 1xDBIA [C27]	O15164	TIF1A_C629	4523.27	90.3	82.2	85.8	90.5	171.9	79.3
[K].AFGSPMIDLSSPVGGSYNLPSLPDIDCSSTIMLDNIVR.[K]	1xTMT6plex [N-Term]; 1xDBIA [C27]	O15164	TIF1A_C629	4507.28	85.7	78.5	97.3	82.1	179	77.4
[K].LLPCLHSFCQR.[C]	1xCarbamidomethyl [C4]; 1xTMT6plex [N-Term]; 1xDBIA [C9]	O15164	TIF1A_C78	1899.03	98.8	92.3	136.3	94.7	82	95.8
[K].VPAELICLDPR.[A]	1xTMT6plex [N-Term]; 1xDBIA [C7]	O15213	WDR46_C515	1751.01	70	61.7	90	80.3	216.4	81.6
[R].HLSTCDGQNPPK.[K]	1xTMT6plex [K12]; 1xTMT6plex [N-Term]; 1xDBIA [C5]	O15226	NKRF_C37	2051.11	97.9	89.8	113.3	98.9	109.3	90.8
[K].SSQCHTGSSPR.[G]	1xTMT6plex [N-Term]; 1xDBIA [C4]	O15226	NKRF_C424	1671.84	91	73.3	157.6	94	105.4	78.7
[K].DLVVYENSSNPVCTLNDTAQFNR.[M]	1xTMT6plex [N-Term]; 1xDBIA [C13]	O15226	NKRF_C453	3124.56	94.8	83.1	126.1	80.6	140.2	75.2
[K].DFEEGCYLLCK.[S]	1xCarbamidomethyl [C6]; 1xTMT6plex [K11]; 1xTMT6plex [N-Term]; 1xDBIA [C10]	O15228	GNPAT_C544	2131.1	99.2	86.1	109.6	89.5	127.3	88.3
[K].GITPCKPIDIK.[C]	2xTMT6plex [K6; K11]; 1xTMT6plex [N-Term]; 1xDBIA [C5]	O15228	GNPAT_C66	2168.34	98.5	94.6	129.8	88.1	120.4	68.6
[R].GGGSCSGSAGGGGSGSLPSQR.[G]	1xTMT6plex [N-Term]; 1xDBIA [C5]	O15234	CASC3_C36	2248.09	114.5	84.6	132.4	106.8	79.9	81.8
[K].YDCGHVQK.[K]	1xTMT6plex [K8]; 1xTMT6plex [N-Term]; 1xDBIA [C3]	O15235	RT12_C132	1703.93	106.1	83.1	155.3	103.3	85	67.3
[R].EAVCFIPGEGHTLQEHQIVLVEGGR.[T]	1xTMT6plex [N-Term]; 1xDBIA [C4]	O15235	RT12_C93	3243.71	100.4	86.9	122.4	81	136.9	72.4
[K].ECINFASFNFLGLLDNPR.[V]	1xTMT6plex [N-Term]; 1xDBIA [C2]	O15269	SPTC1_C100	2595.36	86.8	79.7	122.3	109	112.8	89.3
[R].AACFAIQK.[G]	1xTMT6plex [K8]; 1xTMT6plex [N-Term]; 1xDBIA [C3]	O15269	SPTC1_C192	1605.96	96.4	80.3	152.5	92	99.5	79.4
[R].GVTEHYGINIDDIDLISANMENALASIGGFCCGR.[S]	1xCarbamidomethyl [C32]; 1xTMT6plex [N-Term]; 1xDBIA [C31]	O15269	SPTC1_C318	4151.02	96.5	68.1	122.9	68.2	151	93.3
[R].LLQEIVDQCMNR.[S]	1xTMT6plex [N-Term]; 1xDBIA [C9]	O15269	SPTC1_C419	1987.07	92.8	75	120.9	90.3	132.7	88.1
[R].ANGCVANGEVR.[N]	1xTMT6plex [N-Term]; 1xDBIA [C4]	O15270	SPTC2_C19	1614.86	129.4	114.5	168.3	100.7	44.2	42.9
[K].GSVAEAEDCYNTALR.[L]	1xTMT6plex [N-Term]; 1xDBIA [C9]	O15294	OGT1_C315	2124.06	97.3	91.8	146.2	100.5	87.4	76.8
[R].YGQNCHK.[G]	1xTMT6plex [K7]; 1xTMT6plex [N-Term]; 1xDBIA [C5]	O15355	PPM1G_C164	1603.88	135.4	102.4	167.3	92.6	43.7	58.5
[R].GTEAGQVGEPGIPTGEAGPSCSSASDKLPR.[V]	1xTMT6plex [K27]; 1xTMT6plex [N-Term]; 1xDBIA [C21]	O15355	PPM1G_C241	3609.86	102.4	103.7	105.2	91.9	136.4	60.3
[R].KPAFTEASCPLSR.[L]	1xTMT6plex [K1]; 1xTMT6plex [N-Term]; 1xDBIA [C9]	O15357	SHIP2_C926	2161.22	136.2	107.5	173.7	77.8	48.9	56
[K].FMTPVIQDNPSGWGPCAVPEQFR.[D]	1xTMT6plex [N-Term]; 1xDBIA [C16]	O15371	EIF3D_C19	3101.55	117.9	90	135.6	99.7	78	78.8
[R].YLEVSEPQDIECCGALEYYDK.[A]	1xCarbamidomethyl [C13]; 1xTMT6plex [K21]; 1xTMT6plex [N-Term]; 1xDBIA [C12]	O15371	EIF3D_C195	3278.6	97.9	83.3	90.4	85.8	170.5	72.1
[R].HCNGVDWR.[Q]	1xTMT6plex [N-Term]; 1xDBIA [C2]	O15371	EIF3D_C404	1511.77	114.9	91.3	139.7	98.3	74.7	81.1
[K].DSFFLDLSCEK.[S]	1xTMT6plex [K11]; 1xTMT6plex [N-Term]; 1xDBIA [C9]	O15381	NVL_C192	2058.1	105.5	76.7	135.6	90.8	108.3	83.2
[R].GVLLHGPPGCGK.[T]	1xTMT6plex [K12]; 1xTMT6plex [N-Term]; 1xDBIA [C10]	O15381	NVL_C309	1889.12	97.6	82.2	134	88.3	116.5	81.4
[R].IVAQLLTCMDDLNNVAATAR.[V]	1xTMT6plex [N-Term]; 1xDBIA [C8]	O15381	NVL_C391	2657.43	78.4	59.5	98.2	93.6	183.4	86.9
[R].EICLGIPDEASR.[E]	1xTMT6plex [N-Term]; 1xDBIA [C3]	O15381	NVL_C431	1827.98	88.9	73.8	102.6	94.5	159.2	81
[R].LPQAFDFCHLAHLTPGFVGADLMALCR.[E]	1xCarbamidomethyl [C26]; 1xTMT6plex [N-Term]; 1xDBIA [C8]	O15381	NVL_C460	3525.82	99.2	81.3	114.4	96	121.8	87.2
[R].EVFGSGTACQVCPVHR.[I]	1xCarbamidomethyl [C12]; 1xTMT6plex [N-Term]; 1xDBIA [C9]	O15382	BCAT2_C342	2272.15	84	81.6	118.2	87.7	147.8	80.6
[R].GIDQCIPLFVQLVLER.[L]	1xTMT6plex [N-Term]; 1xDBIA [C5]	O15397	IPO8_C757	2368.36	105.7	83.6	134	110.5	86.8	79.5
[R].DAVAVRPGGCGK.[K]	1xTMT6plex [K12]; 1xTMT6plex [N-Term]; 1xDBIA [C10]	O15417	TNC18_C607	1884.09	94.5	88.9	147.3	106.3	79.4	83.6
[K].AVDQVCTFLFK.[K]	1xTMT6plex [K11]; 1xTMT6plex [N-Term]; 1xDBIA [C6]	O15541	R113A_C15	2025.16	120.3	100.6	164.1	95.2	60.8	59
[K].ANNNVGTGTCDK.[V]	1xTMT6plex [K12]; 1xTMT6plex [N-Term]; 1xDBIA [C10]	O15550	KDM6A_C797	1948.03	106.8	82.1	145.1	98.6	88	79.4
[R].GVACTQPR.[R]	1xTMT6plex [N-Term]; 1xDBIA [C4]	O43143	DHX15_C190	1356.76	121.8	85	121.3	85.8	107.8	78.3
[K].FQIYFDNCPLLTIPGR.[T]	1xTMT6plex [N-Term]; 1xDBIA [C8]	O43143	DHX15_C307	2422.32	98.3	77.6	129.5	85.9	137.5	71.1
[R].TCTDIKPEWLVK.[I]	2xTMT6plex [K6; K12]; 1xTMT6plex [N-Term]; 1xDBIA [C2]	O43143	DHX15_C750	2416.42	98.4	98.3	135.2	89.6	105.9	72.6
[K].ESSSCGK.[D]	1xTMT6plex [K7]; 1xTMT6plex [N-Term]; 1xDBIA [C5]	O43148	MCES_C73	1451.79	120.8	87.4	153.2	101	73.9	63.7
[R].EAAAALLPTPPCESLVSR.[H]	1xTMT6plex [N-Term]; 1xDBIA [C12]	O43149	ZZEF1_C69	2350.3	105.9	87.3	113.5	96.1	119.2	78.1
[K].AQLSGLQLQPCLYK.[R]	1xTMT6plex [K14]; 1xTMT6plex [N-Term]; 1xDBIA [C11]	O43159	RRP8_C451	2316.35	112.2	79.5	131.8	88.1	106.6	81.8
[K].LWSVPDCNLLHTLR.[G]	1xTMT6plex [N-Term]; 1xDBIA [C7]	O43172	PRP4_C263	2192.22	111.9	84.7	132.5	89.6	98.5	82.8
[K].GILVMNTPNGNSLSAAELTCGMIMCLAR.[Q]	1xCarbamidomethyl [C20]; 1xTMT6plex [N-Term]; 1xDBIA [C25]	O43175	SERA_C116	3462.76	110.3	90.1	136.7	98.8	91.4	72.7
[K].VLISDSLDPCCRK.[I]	1xCarbamidomethyl [C11]; 1xTMT6plex [K13]; 1xTMT6plex [N-Term]; 1xDBIA [C10]	O43175	SERA_C18	2260.26	124.4	95	150.8	101.5	58.2	70
[R].ALQSGQCAGAALDVFTEEPPRDR.[A]	1xTMT6plex [N-Term]; 1xDBIA [C7]	O43175	SERA_C254	2956.51	107.5	79.1	121.8	94.7	125.7	71.2
[R].ALVDHENVISCPHLGASTK.[E]	1xTMT6plex [K19]; 1xTMT6plex [N-Term]; 1xDBIA [C11]	O43175	SERA_C281	2745.51	92.2	94	127.7	82.9	129.5	73.8
[K].NAGNCLSPAVIVGLLK.[E]	1xTMT6plex [K16]; 1xTMT6plex [N-Term]; 1xDBIA [C5]	O43175	SERA_C369	2323.39	112.7	103.9	161.4	93.3	58.6	70
[R].ISFCLDIHNMSVK.[A]	1xTMT6plex [K13]; 1xTMT6plex [N-Term]; 1xDBIA [C4]	O43242	PSMD3_C483	2261.26	103.9	99.2	153.7	85.8	87.6	69.8
[K].QLQEFSTAIEEYNCALTEK.[K]	1xTMT6plex [K19]; 1xTMT6plex [N-Term]; 1xDBIA [C14]	O43264	ZW10_C124	2971.55	97.5	88.4	116.9	92.9	128.5	75.8
[R].LAPILCDGTATFVDLVPGFR.[R]	1xTMT6plex [N-Term]; 1xDBIA [C6]	O43264	ZW10_C568	2630.46	109.3	90.7	124.8	91.3	108.8	75.2
[R].LAPILCDGTATFVDLVPGFRR.[L]	1xTMT6plex [N-Term]; 1xDBIA [C6]	O43264	ZW10_C568	2786.56	87.4	99.2	116.1	121.8	96.7	78.9
[R].LGIVWQDVLPVNIYCK.[A]	1xTMT6plex [K16]; 1xTMT6plex [N-Term]; 1xDBIA [C15]	O43264	ZW10_C650	2614.52	134	100.7	163.4	74.3	65	62.6
[R].GLAAALLLCQNK.[G]	1xTMT6plex [K12]; 1xTMT6plex [N-Term]; 1xDBIA [C9]	O43290	SNUT1_C645	1969.2	102.4	85.2	115.8	95	123.5	78.1
[K].ESMAVFEQHCK.[M]	1xTMT6plex [K11]; 1xTMT6plex [N-Term]; 1xDBIA [C10]	O43318	M3K7_C527	2063.08	115.9	101.4	150.7	92.8	63.7	75.6
[R].KAQDCYFMK.[L]	2xTMT6plex [K1; K9]; 1xTMT6plex [N-Term]; 1xDBIA [C5]	O43353	RIPK2_C380	2117.19	126.4	110.3	180.7	92.8	39.1	50.6
[K].AQDCYFMK.[L]	1xTMT6plex [K8]; 1xTMT6plex [N-Term]; 1xDBIA [C4]	O43353	RIPK2_C380	1759.93	117.1	109.8	170.2	97.5	46.6	58.8
[R].GYAFITFCGK.[E]	1xTMT6plex [K10]; 1xTMT6plex [N-Term]; 1xDBIA [C8]	O43390	HNRPR_C214	1861.04	97.1	78.2	151.9	93.3	98.3	81.2
[K].AYSFAMGCWPK.[N]	1xTMT6plex [K11]; 1xTMT6plex [N-Term]; 1xDBIA [C8]	O43414	ERI3_C285	2015.06	123.9	98.2	156.4	90.7	63.9	66.8
[R].GDFCGGTER.[A]	1xTMT6plex [N-Term]; 1xDBIA [C4]	O43482	MS18B_C21	1466.73	114.6	103.1	159	90.8	69.3	63.2
[R].QVETELFPCLR.[H]	1xTMT6plex [N-Term]; 1xDBIA [C9]	O43488	ARK72_C214	1860.03	112.3	89.8	138.1	97	92.7	70
[K].LGVCANGLLIYKDR.[L]	1xTMT6plex [K12]; 1xTMT6plex [N-Term]; 1xDBIA [C4]	O43491	E41L2_C424	2289.35	105.8	79.7	162.7	107.3	64.2	80.2
[K].LGVCANGLLIYK.[D]	1xTMT6plex [K12]; 1xTMT6plex [N-Term]; 1xDBIA [C4]	O43491	E41L2_C424	2018.22	105.9	91	144.3	97.3	91.6	69.9
[K].VNGEVSHVDIDVLPQIICCSEPPVVK.[T]	1xCarbamidomethyl [C19]; 1xTMT6plex [K26]; 1xTMT6plex [N-Term]; 1xDBIA [C18]	O43491	E41L2_C866	3600.95	93.3	84.4	115.6	94.7	132.1	79.9
[R].LSLGCPVLDALLR.[G]	1xTMT6plex [N-Term]; 1xDBIA [C5]	O43542	XRCC3_C86	1895.13	142.3	118.9	139.1	79	61.3	59.3
[R].VCGLATFEIDLK.[E]	1xTMT6plex [K12]; 1xTMT6plex [N-Term]; 1xDBIA [C2]	O43583	DENR_C132	2063.2	114.4	89.5	144.5	99.8	79	72.8
[R].GEPGRPALYFCGSIR.[G]	1xTMT6plex [N-Term]; 1xDBIA [C11]	O43598	DNPH1_C26	2148.16	102.9	93.8	145.8	102.1	85.8	69.6
[R].LPPSGSKPVAASTCSGK.[K]	2xTMT6plex [K7; K17]; 1xTMT6plex [N-Term]; 1xDBIA [C14]	O43663	PRC1_C531	2570.49	113.7	100.2	159.5	93.9	64.8	67.9
[R].ECSDVQPK.[L]	1xTMT6plex [K8]; 1xTMT6plex [N-Term]; 1xDBIA [C2]	O43678	NDUA2_C58	1659.91	98	79.6	140	91.1	115.5	75.7
[R].APCLPVTYQQTPVNMEK.[N]	1xTMT6plex [K17]; 1xTMT6plex [N-Term]; 1xDBIA [C3]	O43683	BUB1_C339	2673.45	121.2	105.2	137.8	102.8	67.3	65.7
[K].DAGCVNK.[S]	1xTMT6plex [K7]; 1xTMT6plex [N-Term]; 1xDBIA [C4]	O43683	BUB1_C407	1460.83	119	95.5	168.6	102.9	52.7	61.2
[R].TPCNAGTFSQPEK.[V]	1xTMT6plex [K13]; 1xTMT6plex [N-Term]; 1xDBIA [C3]	O43684	BUB3_C129	2134.14	118.9	86.5	131.6	100.6	92.1	70.3
[R].LLVLEAFQVSHPCR.[Q]	1xTMT6plex [N-Term]; 1xDBIA [C13]	O43708	MAAI_C205	2137.22	106.3	87.2	138.6	92	96.7	79.2
[K].RGFEGSCSQK.[E]	1xTMT6plex [K10]; 1xTMT6plex [N-Term]; 1xDBIA [C7]	O43719	HTSF1_C480	1853.01	132.3	105.1	154.4	97.7	49.7	60.9
[K].ADCASGIFLAAEK.[Y]	1xTMT6plex [K13]; 1xTMT6plex [N-Term]; 1xDBIA [C3]	O43747	AP1G1_C400	2050.14	123.3	100.8	142.3	100.2	62.7	70.8
[K].AIELNPANAVYFCNR.[A]	1xTMT6plex [N-Term]; 1xDBIA [C13]	O43765	SGTA_C129	2220.18	99.4	102.1	165.8	95	74.9	62.6
[R].AICIDPAYSK.[A]	1xTMT6plex [K10]; 1xTMT6plex [N-Term]; 1xDBIA [C3]	O43765	SGTA_C153	1835.05	91.9	101.4	166.9	96.4	75.4	68.1
[R].AFPANAACFLGFEVAMK.[F]	1xTMT6plex [K17]; 1xTMT6plex [N-Term]; 1xDBIA [C8]	O43772	MCAT_C283	2541.38	122.9	103.1	155.9	79.4	84.7	54
[R].LMTDTINEPILLCR.[F]	1xTMT6plex [N-Term]; 1xDBIA [C13]	O43776	SYNC_C438	2157.2	114.6	90	142.1	93.4	80.8	79.1
[R].CPEDSR.[L]	1xTMT6plex [N-Term]; 1xDBIA [C1]	O43776	SYNC_C452	1231.63	122.8	88.7	180.8	87.7	54.5	65.6
[R].SLASAQCPFLGPPRK.[R]	1xTMT6plex [K15]; 1xTMT6plex [N-Term]; 1xDBIA [C7]	O43791	SPOP_C361	2326.35	107.2	86.6	148.5	101.7	80.5	75.6
[K].LVMSYVAAVCGK.[G]	1xTMT6plex [K12]; 1xTMT6plex [N-Term]; 1xDBIA [C10]	O43795	MYO1B_C129	1995.15	102.5	85	154.8	102.4	84.3	71
[K].AAHIFNEALVCHQIR.[Y]	1xTMT6plex [N-Term]; 1xDBIA [C11]	O43795	MYO1B_C613	2247.24	100.5	87.4	118.4	87.3	120	86.5
[K].EDQCLMPEAWNVDQGVITK.[L]	1xTMT6plex [K19]; 1xTMT6plex [N-Term]; 1xDBIA [C4]	O43815	STRN_C316	2930.52	98.2	79.1	105.4	91.5	152.9	73
[K].CYIASAGADALAK.[V]	1xTMT6plex [K13]; 1xTMT6plex [N-Term]; 1xDBIA [C1]	O43815	STRN_C765	2008.13	110.5	88.1	153.9	105	73.1	69.4
[R].GEPGLEQPFWISSVAALLNTDLVATGSHSSCVR.[L]	1xTMT6plex [N-Term]; 1xDBIA [C31]	O43818	U3IP2_C399	3967.06	77.3	76.5	126.8	68.4	171.6	79.4
[K].ANDGGLAAGAPAMHMASYGPEPCTDNSDSLIAK.[I]	1xTMT6plex [K33]; 1xTMT6plex [N-Term]; 1xDBIA [C23]	O43823	AKAP8_C85	3986.95	63.1	73.9	83.3	77.5	233.1	69.2
[K].GSSNFCVK.[N]	1xTMT6plex [K8]; 1xTMT6plex [N-Term]; 1xDBIA [C6]	O43865	SAHH2_C106	1595.9	111.8	98.2	162.4	105.2	54.4	67.9
[K].LCVPAMNVNDSVTK.[Q]	1xOxidation [M6]; 1xTMT6plex [K14]; 1xTMT6plex [N-Term]; 1xDBIA [C2]	O43865	SAHH2_C272	2261.24	122.4	100	144	95.2	65.4	72.9
[K].LCVPAMNVNDSVTK.[Q]	1xTMT6plex [K14]; 1xTMT6plex [N-Term]; 1xDBIA [C2]	O43865	SAHH2_C272	2245.24	123.7	94.5	151.9	94.1	70.6	65.2
[K].FDNLYCCR.[E]	1xCarbamidomethyl [C6]; 1xTMT6plex [N-Term]; 1xDBIA [C7]	O43865	SAHH2_C293	1615.79	124.6	101	172	94.3	47.6	60.5
[K].IEYDDFVECLLR.[Q]	1xTMT6plex [N-Term]; 1xDBIA [C9]	O43920	NDUS5_C66	2040.07	113	77.6	143.5	123	67.8	75.1
[K].AHVFECNLESSVESIISPK.[V]	1xTMT6plex [K19]; 1xTMT6plex [N-Term]; 1xDBIA [C6]	O60216	RAD21_C35	2843.54	103.9	84.8	119.4	92.5	121.4	78
[K].LSDDPCPVESK.[K]	1xTMT6plex [K11]; 1xTMT6plex [N-Term]; 1xDBIA [C6]	O60244	MED14_C621	1944.05	100	76.6	123	91	128.5	81
[K].LLASMMCK.[A]	1xTMT6plex [K8]; 1xTMT6plex [N-Term]; 1xDBIA [C7]	O60256	KPRB_C135	1650.95	121.6	93	142.3	99.6	68.2	75.2
[K].ATNVCTR.[F]	1xTMT6plex [N-Term]; 1xDBIA [C5]	O60264	SMCA5_C165	1289.72	112.3	81.9	157.7	93.8	91.7	62.6
[R].VLDILEDYCMWR.[N]	1xTMT6plex [N-Term]; 1xDBIA [C9]	O60264	SMCA5_C519	2081.08	112.7	75.7	137.9	120.7	52.5	100.6
[R].AVSPAIPSAPLYEEITYSGISDGLSQASCPLAAIDHILDSSR.[Q]	1xTMT6plex [N-Term]; 1xDBIA [C29]	O60291	MGRN1_C428	4840.49	59	76	90.2	87.6	233.9	53.3
[R].AASIENVLQDSSPEHCGR.[G]	1xTMT6plex [N-Term]; 1xDBIA [C16]	O60291	MGRN1_C528	2438.23	98.6	97.2	135.4	90.5	99.1	79.3
[R].ASLCNLYNWR.[Y]	1xTMT6plex [N-Term]; 1xDBIA [C4]	O60306	AQR_C1144	1764.94	106.4	87.7	149.8	96.4	83.9	75.8
[K].KIVAPTVSQINAEFVTQLACK.[Y]	2xTMT6plex [K1; K21]; 1xTMT6plex [N-Term]; 1xDBIA [C20]	O60306	AQR_C28	3243.91	101.1	76.1	140.5	95.4	109.4	77.4
[K].IVAPTVSQINAEFVTQLACK.[Y]	1xTMT6plex [K20]; 1xTMT6plex [N-Term]; 1xDBIA [C19]	O60306	AQR_C28	2886.65	101.1	76.9	121.7	85.3	133.2	81.8
[R].TQEQCVHNETK.[N]	1xTMT6plex [K11]; 1xTMT6plex [N-Term]; 1xDBIA [C5]	O60313	OPA1_C786	2071.1	111	87.7	107.7	83.8	132.7	77.1
[R].ALAPSAECPIAEENLAR.[G]	1xTMT6plex [N-Term]; 1xDBIA [C8]	O60318	GANP_C1285	2280.22	84.8	68.9	91.4	76.5	211.1	67.4
[R].STECAQEGR.[I]	1xTMT6plex [N-Term]; 1xDBIA [C4]	O60318	GANP_C1839	1505.76	103.8	74.4	143.1	111.6	86.1	80.9
[R].GASAEELLAQCLSSSLLLEKEENK.[R]	2xTMT6plex [K20; K24]; 1xTMT6plex [N-Term]; 1xDBIA [C11]	O60318	GANP_C1864	3545.97	78.9	71.5	99.2	98.8	170.3	81.3
[R].EQLQLSEATGTCLGER.[L]	1xTMT6plex [N-Term]; 1xDBIA [C12]	O60318	GANP_C1945	2260.18	101.8	79.3	122.8	86.2	139.6	70.4
[R].QGCEEAVSQVEPLPSLMK.[G]	1xTMT6plex [K18]; 1xTMT6plex [N-Term]; 1xDBIA [C3]	O60318	GANP_C274	2699.45	103.1	73.3	113	101.3	126	83.3
[R].SQKPEAGGCGAPAAR.[E]	1xTMT6plex [K3]; 1xTMT6plex [N-Term]; 1xDBIA [C9]	O60343	TBCD4_C74	2154.19	124.2	97.8	153.5	102.1	53.3	69.1
[K].GYDAPLCNLLLFK.[K]	1xTMT6plex [K13]; 1xTMT6plex [N-Term]; 1xDBIA [C7]	O60488	ACSL4_C420	2221.28	100	89	130.7	79	126.5	74.7
[K].LGCFEIAK.[M]	1xTMT6plex [K8]; 1xTMT6plex [N-Term]; 1xDBIA [C3]	O60502	OGA_C896	1634.97	131.4	94.2	170.6	89	54.1	60.7
[R].GYAFVTFCTK.[E]	1xTMT6plex [K10]; 1xTMT6plex [N-Term]; 1xDBIA [C8]	O60506	HNRPQ_C211	1891.06	106.8	88.6	141.4	91.6	94	77.6
[R].CPLPAADSLMHLTK.[S]	1xTMT6plex [K14]; 1xTMT6plex [N-Term]; 1xDBIA [C1]	O60508	PRP17_C29	2251.27	96.3	90.6	129.2	98	112.3	73.6
[R].QAEEIYENIPGLCK.[T]	1xTMT6plex [K14]; 1xTMT6plex [N-Term]; 1xDBIA [C13]	O60518	RNBP6_C48	2361.29	104.2	82.9	135.3	87.3	115.3	75
[K].IYLGQLECFSLGNLDAK.[R]	1xTMT6plex [K17]; 1xTMT6plex [N-Term]; 1xDBIA [C8]	O60547	GMDS_C237	2638.47	119.5	103.7	131.2	95.6	79	71
[R].AMELLSACQGPAR.[N]	1xTMT6plex [N-Term]; 1xDBIA [C8]	O60551	NMT2_C104	1872	109.3	98.6	150.9	98.7	70.3	72.3
[R].ACEAAK.[K]	1xTMT6plex [K6]; 1xTMT6plex [N-Term]; 1xDBIA [C2]	O60563	CCNT1_C261	1346.79	115.1	83.1	154.9	98.2	81.1	67.7
[K].CLQIPEK.[L]	1xTMT6plex [K7]; 1xTMT6plex [N-Term]; 1xDBIA [C1]	O60566	BUB1B_C700	1584.95	121	94.5	182.1	98.6	45.8	58
[K].LELTNETSENPTQSPWCSQYR.[R]	1xTMT6plex [N-Term]; 1xDBIA [C17]	O60566	BUB1B_C723	3008.46	114.2	103.5	180.8	96.7	45.6	59.2
[R].IHDPYDCNK.[N]	1xTMT6plex [K9]; 1xTMT6plex [N-Term]; 1xDBIA [C7]	O60566	BUB1B_C900	1858.99	108.1	97.1	150	94.7	74	76.2
[K].GLDYEGGGCR.[F]	1xTMT6plex [N-Term]; 1xDBIA [C9]	O60568	PLOD3_C691	1551.78	99.2	83.2	151.1	83.5	112.8	70.1
[K].LVAEDLSQDCFWTK.[V]	1xTMT6plex [K14]; 1xTMT6plex [N-Term]; 1xDBIA [C10]	O60610	DIAP1_C796	2409.29	118.1	108.9	172.2	86.3	49.1	65.3
[K].LMDLECSR.[D]	1xTMT6plex [N-Term]; 1xDBIA [C6]	O60645	EXOC3_C150	1491.79	115.1	90	163.4	102.5	60.8	68.1
[K].ADLLDTINSCIR.[I]	1xTMT6plex [N-Term]; 1xDBIA [C10]	O60658	PDE8A_C279	1859.03	104.6	86.8	157.6	93	78.8	79.2
[R].AVGNIVTGDDIQTQVILNCSALPCLLHLLSSPK.[E]	1xCarbamidomethyl [C19]; 1xTMT6plex [K33]; 1xTMT6plex [N-Term]; 1xDBIA [C24]	O60684	IMA7_C340	4244.36	92.2	89.2	124	85.5	133.1	76
[R].ISSINSISALCEATGADVEEVATAIGMDQR.[I]	1xTMT6plex [N-Term]; 1xDBIA [C11]	O60701	UGDH_C241	3576.81	74.9	73.4	107.9	73.5	197	73.3
[K].ASVGFGGSCFQK.[D]	1xTMT6plex [K12]; 1xTMT6plex [N-Term]; 1xDBIA [C9]	O60701	UGDH_C276	1942.06	138.6	94	156	97.9	53.1	60.3
[R].EPNEDCKPR.[H]	1xTMT6plex [K7]; 1xTMT6plex [N-Term]; 1xDBIA [C6]	O60716	CTND1_C516	1841.99	89.7	73.6	118.4	86.5	143.1	88.8
[R].HIEWESVLTNTAGCLR.[N]	1xTMT6plex [N-Term]; 1xDBIA [C14]	O60716	CTND1_C533	2354.25	103.6	99.9	124.7	92.7	88.6	90.6
[K].LVENCVCLLR.[N]	1xCarbamidomethyl [C5]; 1xTMT6plex [N-Term]; 1xDBIA [C7]	O60716	CTND1_C581	1743.98	109.6	94.7	137.3	103.4	80.4	74.6
[K].TPAILEASAGAIQNLCAGR.[W]	1xTMT6plex [N-Term]; 1xDBIA [C16]	O60716	CTND1_C692	2381.32	113.8	86.8	129.8	97.9	86.4	85.4
[K].NICQFLLEVGIVK.[E]	1xTMT6plex [K13]; 1xTMT6plex [N-Term]; 1xDBIA [C3]	O60739	EIF1B_C94	2230.34	105.5	87.1	129.5	106.7	88.5	82.6
[K].CQNEQLQTAVTQQVSQIQQHK.[D]	1xTMT6plex [K21]; 1xTMT6plex [N-Term]; 1xDBIA [C1]	O60763	USO1_C678	3193.72	107.6	89.5	153.9	100.2	73.8	75
[K].VFDPSCGLPYYWNADTDLVSWLSPHDPNSVVTK.[S]	1xTMT6plex [K33]; 1xTMT6plex [N-Term]; 1xDBIA [C6]	O60828	PQBP1_C60	4477.26	94.3	106	134.2	84.1	104	77.4
[R].APIICVLGHVDTGK.[T]	1xTMT6plex [K14]; 1xTMT6plex [N-Term]; 1xDBIA [C5]	O60841	IF2P_C635	2177.29	103.6	99	164	97.5	67.1	68.8
[K].LRAPIICVLGHVDTGK.[T]	1xTMT6plex [K16]; 1xTMT6plex [N-Term]; 1xDBIA [C7]	O60841	IF2P_C635	2446.47	106	87	154.1	99.6	72.7	80.5
[K].CPFIVALNK.[I]	1xTMT6plex [K9]; 1xTMT6plex [N-Term]; 1xDBIA [C1]	O60841	IF2P_C749	1759.07	130.2	98.8	175.5	90.5	45.1	60
[K].KCPFIVALNK.[I]	2xTMT6plex [K1; K10]; 1xTMT6plex [N-Term]; 1xDBIA [C2]	O60841	IF2P_C749	2116.33	126.3	94	183.2	93.8	43	59.8
[R].LAHCEELR.[A]	1xTMT6plex [N-Term]; 1xDBIA [C4]	O60841	IF2P_C853	1495.83	110.3	99.8	150.4	102.4	68.6	68.4
[K].IEPTELSENCFWLR.[V]	1xTMT6plex [N-Term]; 1xDBIA [C10]	O60879	DIAP2_C655	2262.18	119.9	103.9	157.4	92.6	62.4	63.8
[K].IETELVCVTTHFK.[D]	1xTMT6plex [K13]; 1xTMT6plex [N-Term]; 1xDBIA [C7]	O60921	HUS1_C200	2274.29	109	97.3	127	94.5	104.3	67.9
[R].LITEENEEEHNFFLAPGTCVVDTGITNSQTLIPDCQK.[K]	1xCarbamidomethyl [C19]; 1xTMT6plex [K37]; 1xTMT6plex [N-Term]; 1xDBIA [C35]	O60934	NBN_C285	4917.47	88.5	74.1	104.3	72.5	185.5	75
[R].ERDEENQEMSSCK.[S]	1xTMT6plex [K13]; 1xTMT6plex [N-Term]; 1xDBIA [C12]	O60934	NBN_C478	2339.14	107.7	80.6	155.9	95.1	93.4	67.2
[R].IETSCSLLEQTQPATPSLWK.[N]	1xTMT6plex [K20]; 1xTMT6plex [N-Term]; 1xDBIA [C5]	O60934	NBN_C487	2986.63	114.1	92.4	129.4	94.6	94.5	75
[R].SASTAGDIACAFRPVK.[S]	1xTMT6plex [K16]; 1xTMT6plex [N-Term]; 1xDBIA [C10]	O75044	SRGP2_C1020	2348.32	120.1	97.9	152.9	113.3	60.5	55.3
[K].DQNVLSPVNCWNLLLNQVK.[WR]	1xTMT6plex [K19]; 1xTMT6plex [N-Term]; 1xDBIA [C10]	O75044	SRGP2_C98	2951.65	137.6	113.4	175.3	87.2	37.4	49
[R].ELLHCAR.[LA]	1xTMT6plex [N-Term]; 1xDBIA [C5]	O75081	MTG16_C250	1366.78	116.9	97.9	162.1	95.3	61.6	66.1
[K].VCALGGSK.[A]	1xTMT6plex [K8]; 1xTMT6plex [N-Term]; 1xDBIA [C2]	O75083	WDR1_C225	1488.9	115.8	90.6	142	101.5	66.1	84
[K].KDDGDSMCGGPGMSDPR.[A]	1xTMT6plex [K1]; 1xTMT6plex [N-Term]; 1xDBIA [C8]	O75122	CLAP2_C976	2479.18	116.3	87.9	163.5	101.7	63.9	66.5
[R].LLLEHLECLVSR.[H]	1xTMT6plex [N-Term]; 1xDBIA [C8]	O75145	LIPA3_C122	1950.14	79.4	78.3	141.4	109.2	111.3	80.4
[K].AGAVEVPGDCVPSEGDYR.[F]	1xTMT6plex [N-Term]; 1xDBIA [C10]	O75147	OBSL1_C581	2346.16	99.3	86.6	123.3	97.5	126	67.2
[R].QACEDELRER.[I]	1xTMT6plex [N-Term]; 1xDBIA [C3]	O75150	BRE1B_C69	1773.91	103.1	92.4	107	105.2	99	93.3
[R].QACEDELR.[E]	1xTMT6plex [N-Term]; 1xDBIA [C3]	O75150	BRE1B_C69	1488.77	96.1	81.8	139.5	90.6	124.1	68
[R].LREIQPCLAESR.[A]	1xTMT6plex [N-Term]; 1xDBIA [C7]	O75150	BRE1B_C890	1940.09	117	102.4	119.5	101.2	82.5	77.3
[K].KDTTCIK.[L]	2xTMT6plex [K1; K7]; 1xTMT6plex [N-Term]; 1xDBIA [C5]	O75152	ZC11A_C431	1792.1	105.6	82.5	149.2	88.7	97.7	76.3
[R].GDVASCNTQVAEKPVLTAVPGITR.[H]	1xTMT6plex [K13]; 1xTMT6plex [N-Term]; 1xDBIA [C6]	O75152	ZC11A_C588	3180.78	98.3	81.2	120.2	90.8	134.2	75.3
[K].CAAQTLEK.[R]	1xTMT6plex [K8]; 1xTMT6plex [N-Term]; 1xDBIA [C1]	O75152	ZC11A_C636	1617.94	112.8	77.3	141.5	110.3	80.7	77.4
[K].CLTQQAVALQR.[T]	1xTMT6plex [N-Term]; 1xDBIA [C1]	O75153	CLU_C1196	1756.01	104.5	100	159.5	89.2	74.3	72.5
[K].SLDPSDAFNGVDCNSLSFLSVFTDGDLGDSGK.[R]	1xTMT6plex [K32]; 1xTMT6plex [N-Term]; 1xDBIA [C13]	O75153	CLU_C153	4033.97	103.5	79.8	119.5	89.6	137.9	69.7
[R].ERPLCPLQPQNR.[D]	1xTMT6plex [N-Term]; 1xDBIA [C5]	O75153	CLU_C200	1976.11	108.9	104	136.3	96.8	75.6	78.5
[R].FPESCQDEVR.[D]	1xTMT6plex [N-Term]; 1xDBIA [C5]	O75153	CLU_C732	1734.87	107.4	70.3	167.3	90.7	85.2	79.1
[K].DAAAFLLSCQIPGLVK.[D]	1xTMT6plex [K16]; 1xTMT6plex [N-Term]; 1xDBIA [C9]	O75153	CLU_C753	2400.41	114.4	88.5	134.7	101.3	83.3	77.7
[R].VCLEIPQEVSQSELFPK.[E]	1xTMT6plex [K17]; 1xTMT6plex [N-Term]; 1xDBIA [C2]	O75164	KDM4A_C402	2700.5	111.7	92.1	133.7	99.9	83.9	78.7
[R].GLPADCR.[G]	1xTMT6plex [N-Term]; 1xDBIA [C6]	O75170	PP6R2_C511	1256.7	118.4	101.4	156.7	97.5	65.2	60.7
[R].DIILSSTSAPPASAQPPLQLSEVNIPLSLGVCPLGPVPLTK.[E]	1xTMT6plex [K41]; 1xTMT6plex [N-Term]; 1xDBIA [C32]	O75175	CNOT3_C600	4874.77	93.7	95.7	129.9	97.4	111.7	71.6
[K].LSETISEGTSNSLSTCTK.[S]	1xTMT6plex [K18]; 1xTMT6plex [N-Term]; 1xDBIA [C16]	O75179	ANR17_C1690	2612.39	104.3	94.6	142.8	99	87.7	71.6
[R].VCDLLLK.[K]	1xTMT6plex [K7]; 1xTMT6plex [N-Term]; 1xDBIA [C2]	O75179	ANR17_C58	1557.98	128	103.7	175.1	92.9	44.8	55.6
[R].QLEAAVGGAQALSCLTGSR.[A]	1xTMT6plex [N-Term]; 1xDBIA [C14]	O75191	XYLB_C161	2357.28	124.4	87.1	129.7	98.3	93.2	67.2
[R].GDCYDR.[Y]	1xTMT6plex [N-Term]; 1xDBIA [C3]	O75306	NDUS2_C326	1253.61	95.1	67.8	161	78.9	109.9	87.3
[K].LAPEECFSPLDLFNK.[I]	1xTMT6plex [K15]; 1xTMT6plex [N-Term]; 1xDBIA [C6]	O75319	DUS11_C117	2477.35	81.5	64.6	89.5	84.3	188.1	92
[K].LQFHNVKPECLEAYNK.[I]	2xTMT6plex [K7; K16]; 1xTMT6plex [N-Term]; 1xDBIA [C10]	O75323	NIPS2_C85	2916.64	85.9	69.6	136.9	89.8	132.8	85
[R].APMECQESWK.[-]	1xTMT6plex [K10]; 1xTMT6plex [N-Term]; 1xDBIA [C5]	O75330	HMMR_C719	1963.02	116.1	101.4	145.1	101.3	62.2	73.9
[R].GSCSTEVEKETQEK.[M]	2xTMT6plex [K9; K14]; 1xTMT6plex [N-Term]; 1xDBIA [C3]	O75348	VATG1_C69	2538.37	107.4	107.6	176.7	103.1	43.3	61.8
[R].GSCSTEVEK.[E]	1xTMT6plex [K9]; 1xTMT6plex [N-Term]; 1xDBIA [C3]	O75348	VATG1_C69	1693.92	105.3	92.8	157	88.5	85.2	71.3
[R].ENKPSIIFIDEIDSLCGSR.[S]	1xTMT6plex [K3]; 1xTMT6plex [N-Term]; 1xDBIA [C16]	O75351	VPS4B_C240	2890.57	116.1	90.7	145.6	99	75.8	72.9
[K].FVIHCNSPVWGADK.[C]	1xTMT6plex [K14]; 1xTMT6plex [N-Term]; 1xDBIA [C5]	O75367	H2AY_C276	2327.27	94.3	85.3	129.5	89.7	118.1	83
[K].GAGTGGLGLTVEGPCEAK.[I]	1xTMT6plex [K18]; 1xTMT6plex [N-Term]; 1xDBIA [C15]	O75369	FLNB_C1081	2371.31	95.1	85.1	110.4	91.9	136.7	80.9
[K].ALGALVDSCAPGLCPDWESWDPQKPVDNAR.[E]	1xCarbamidomethyl [C9]; 1xTMT6plex [K24]; 1xTMT6plex [N-Term]; 1xDBIA [C14]	O75369	FLNB_C183	4022.03	100.3	78.4	121	88.6	130.9	80.8
[K].APSGRDEPCLLK.[R]	1xTMT6plex [K12]; 1xTMT6plex [N-Term]; 1xDBIA [C9]	O75369	FLNB_C1952	2040.17	108.2	83	139.2	97.5	89.4	82.6
[R].APSVATVGSICDLNLK.[I]	1xTMT6plex [K16]; 1xTMT6plex [N-Term]; 1xDBIA [C11]	O75369	FLNB_C2115	2342.35	95.4	95.8	129.3	99.9	95.4	84.2
[R].SSTETCYSAIPK.[A]	1xTMT6plex [K12]; 1xTMT6plex [N-Term]; 1xDBIA [C6]	O75369	FLNB_C2501	2041.1	114	92.8	151.4	101.2	69.4	71.2
[K].IEYNDQNDGSCDVK.[Y]	1xTMT6plex [K14]; 1xTMT6plex [N-Term]; 1xDBIA [C11]	O75369	FLNB_C604	2354.17	114.5	73.8	134.6	88.4	104.7	84
[K].SGCIVNNLAEFTVDPK.[D]	1xTMT6plex [K16]; 1xTMT6plex [N-Term]; 1xDBIA [C3]	O75369	FLNB_C660	2461.35	118.5	90.5	158.1	94.9	66.1	71.8
[R].ESPVSAPLEGLICR.[A]	1xTMT6plex [N-Term]; 1xDBIA [C13]	O75376	NCOR1_C1274	1996.11	100.4	90.3	138.2	103	98.4	69.7
[R].AAVIPPMVSCTPCNIPIGTPVSGYALYQR.[H]	1xCarbamidomethyl [C10]; 1xTMT6plex [N-Term]; 1xDBIA [C13]	O75376	NCOR1_C946	3600.89	97.9	102.7	151.9	90.5	85	72
[R].GFSIPECQK.[L]	1xTMT6plex [K9]; 1xTMT6plex [N-Term]; 1xDBIA [C7]	O75390	CISY_C101	1762.99	90.7	77.9	119.7	88.4	140.9	82.4
[K].AAHGCVTAVSGK.[A]	1xTMT6plex [K12]; 1xTMT6plex [N-Term]; 1xDBIA [C5]	O75410	TACC1_C174	1855.06	93.3	88.3	134.8	98.5	101.5	83.7
[K].APVSVSCGGESPLDGICLSESDK.[T]	1xCarbamidomethyl [C17]; 1xTMT6plex [K23]; 1xTMT6plex [N-Term]; 1xDBIA [C7]	O75410	TACC1_C587	3061.56	100.6	96.9	121.6	93.4	119.6	67.9
[K].SFVCSTK.[N]	1xTMT6plex [K7]; 1xTMT6plex [N-Term]; 1xDBIA [C4]	O75419	CDC45_C479	1525.88	124	90.2	171.3	91.2	56.2	67.1
[R].VTCLESGLR.[V]	1xTMT6plex [N-Term]; 1xDBIA [C3]	O75439	MPPB_C62	1502.86	94.5	98.3	108.8	114.4	98.2	85.9
[R].GYAQSCR.[FY]	1xTMT6plex [N-Term]; 1xDBIA [C6]	O75444	MAF_C305	1309.69	113	77.1	165	102.1	70.2	72.6
[K].AQLVEIVGCHFR.[S]	1xTMT6plex [N-Term]; 1xDBIA [C9]	O75446	SAP30_C184	1897.07	111.9	77.6	174.5	89.8	82.2	64.1
[R].FYSPATIFIDEIDSICSR.[R]	1xTMT6plex [N-Term]; 1xDBIA [C16]	O75449	KTNA1_C314	2602.34	103.6	117.7	141.4	94.1	66.7	76.5
[K].WIFEFGSC.[-]	1xTMT6plex [N-Term]; 1xDBIA [C8]	O75449	KTNA1_C491	1513.77	138.8	71.6	163.6	88.8	70.9	66.3
[K].AMISDFGLCK.[K]	1xTMT6plex [K10]; 1xTMT6plex [N-Term]; 1xDBIA [C9]	O75460	ERN1_C715	1839.03	98.5	82	141.3	91.5	98.9	87.8
[R].ETLGSLPDDFVCYFTSR.[F]	1xTMT6plex [N-Term]; 1xDBIA [C12]	O75460	ERN1_C931	2475.24	101.6	86	144.6	103.5	101	63.4
[K].QPCPSESDIITEEDKSK.[K]	2xTMT6plex [K15; K17]; 1xTMT6plex [N-Term]; 1xDBIA [C3]	O75475	PSIP1_C204	2889.55	86.6	62.8	104.9	95.2	170.1	80.5
[K].QPCPSESDIITEEDK.[S]	1xTMT6plex [K15]; 1xTMT6plex [N-Term]; 1xDBIA [C3]	O75475	PSIP1_C204	2445.26	78.5	68	83.7	82.5	209.9	77.5
[K].IYFGSNIPNMFVDSSCALK.[Y]	1xTMT6plex [K19]; 1xTMT6plex [N-Term]; 1xDBIA [C16]	O75477	ERLN1_C312	2860.51	104.5	92.1	121.5	95.6	99.8	86.5
[R].GCSSYLMEPYIK.[C]	1xTMT6plex [K12]; 1xTMT6plex [N-Term]; 1xDBIA [C2]	O75478	TAD2A_C20	2145.15	112.2	98.2	133.1	78.5	96.9	81.1
[K].GAETWFDSYDCSK.[F]	1xTMT6plex [K13]; 1xTMT6plex [N-Term]; 1xDBIA [C11]	O75503	CLN5_C231	2263.11	96.2	80.1	141.6	82.5	119.2	80.4
[R].WLSDECTNAVVNFLSR.[K]	1xTMT6plex [N-Term]; 1xDBIA [C6]	O75521	ECI2_C380	2379.23	104.9	77.8	137.9	92	112.9	74.4
[K].SEAQHEQPEDGCPFGALTQR.[L]	1xTMT6plex [N-Term]; 1xDBIA [C12]	O75528	TADA3_C255	2725.32	97.8	89.2	144.6	92	111.5	64.8
[K].DCPLQFHDFK.[S]	1xTMT6plex [K10]; 1xTMT6plex [N-Term]; 1xDBIA [C2]	O75528	TADA3_C7	2004.08	111.1	90.2	156.4	99.4	75.4	67.4
[R].IINPITMQCIK.[H]	1xTMT6plex [K11]; 1xTMT6plex [N-Term]; 1xDBIA [C9]	O75530	EED_C182	2028.21	113.7	71.4	129.9	97.3	109.9	77.9
[K].VQENCIDLVGR.[I]	1xTMT6plex [N-Term]; 1xDBIA [C5]	O75533	SF3B1_C1035	1770.97	121.5	86.9	149.9	95.1	75.6	71.1
[R].VKPYLPQICGTVLWR.[L]	1xTMT6plex [K2]; 1xTMT6plex [N-Term]; 1xDBIA [C9]	O75533	SF3B1_C933	2527.5	106.5	104.5	171.3	83.2	72.6	61.9
[K].LLTSYGFIQCSER.[Q]	1xTMT6plex [N-Term]; 1xDBIA [C10]	O75534	CSDE1_C42	2042.09	117.4	83	133.3	108.2	86.8	71.1
[K].EAEDGIIAYDDCGVK.[L]	1xTMT6plex [K15]; 1xTMT6plex [N-Term]; 1xDBIA [C12]	O75534	CSDE1_C464	2352.22	111.4	86.8	138.9	96.9	94.2	71.8
[K].QRPGQQVATCVR.[L]	1xTMT6plex [N-Term]; 1xDBIA [C10]	O75534	CSDE1_C506	1868.05	130.3	101.1	144.3	94.8	67.3	62.1
[R].ATVECVK.[D]	1xTMT6plex [K7]; 1xTMT6plex [N-Term]; 1xDBIA [C5]	O75534	CSDE1_C680	1503.9	118.8	91.6	132.9	95.6	89.6	71.5
[K].ANASICFAVPDPLMPDPSKQPK.[N]	2xTMT6plex [K19; K22]; 1xTMT6plex [N-Term]; 1xDBIA [C6]	O75569	PRKRA_C106	3309.83	124.8	91.6	145.3	99.3	70.9	68.2
[K].ANASICFAVPDPLMPDPSK.[Q]	1xTMT6plex [K19]; 1xTMT6plex [N-Term]; 1xDBIA [C6]	O75569	PRKRA_C106	2727.46	107.3	86.6	138.6	102.9	93.7	70.8
[K].GASCSAQGFDYGLGNSK.[G]	1xTMT6plex [K17]; 1xTMT6plex [N-Term]; 1xDBIA [C4]	O75592	MYCB2_C2700	2416.23	117.4	97.6	169.6	92.7	57.4	65.4
[K].AASQNMIFPSPGSCAVLK.[K]	1xTMT6plex [K18]; 1xTMT6plex [N-Term]; 1xDBIA [C14]	O75592	MYCB2_C3190	2575.41	117.6	101.3	134.5	100.2	74.1	72.3
[K].MPCLYLQTLAR.[H]	1xTMT6plex [N-Term]; 1xDBIA [C3]	O75592	MYCB2_C3392	1834.03	107.9	91.9	135.8	90.8	82	91.5
[R].LVATDGAFSMDGDIAPLQEICCLASR.[Y]	1xCarbamidomethyl [C21]; 1xTMT6plex [N-Term]; 1xDBIA [C22]	O75600	KBL_C219	3278.64	98.8	66	128	98.3	129.7	79.1
[K].LSCQPMLSLDDFQLQPPVTFR.[L]	1xTMT6plex [N-Term]; 1xDBIA [C3]	O75607	NPM3_C105	2960.56	110.6	90.6	136.9	98.3	91.2	72.3
[R].VPAPVTMDSFFFGCELSGHTR.[S]	1xTMT6plex [N-Term]; 1xDBIA [C14]	O75607	NPM3_C41	2823.42	100.4	53.3	148.1	69.9	136.6	91.8
[R].WLSCETQLPVSFR.[H]	1xTMT6plex [N-Term]; 1xDBIA [C4]	O75643	U520_C1278	2091.13	111.1	83.9	149.5	85.5	92.7	77.2
[R].DILCGAADEVLAVLK.[N]	1xTMT6plex [K15]; 1xTMT6plex [N-Term]; 1xDBIA [C4]	O75643	U520_C133	2284.34	103.3	77.6	121.4	88.1	127.9	81.7
[R].LTAIDILTTCAADIQR.[Q]	1xTMT6plex [N-Term]; 1xDBIA [C10]	O75643	U520_C1580	2243.26	96.1	73.4	107.2	96.3	142.5	84.5
[R].CQLPDGSFR.[R]	1xTMT6plex [N-Term]; 1xDBIA [C1]	O75643	U520_C428	1547.82	113.7	81.6	150	100.8	77	77
[R].AALETDENLLLCAPTGAGK.[T]	1xTMT6plex [K19]; 1xTMT6plex [N-Term]; 1xDBIA [C12]	O75643	U520_C502	2641.46	88.3	81.5	108.3	78.2	163.7	80
[R].LATYGITVAELTGDHQLCK.[E]	1xTMT6plex [K19]; 1xTMT6plex [N-Term]; 1xDBIA [C18]	O75643	U520_C576	2787.55	86	85.4	120.4	87.4	139.7	81
[K].VACAEEWQESR.[T]	1xTMT6plex [N-Term]; 1xDBIA [C3]	O75663	TIPRL_C87	1832.92	107	97.7	164.6	92.4	82.8	55.5
[R].VDEEEKEYTCK.[S]	2xTMT6plex [K6; K11]; 1xTMT6plex [N-Term]; 1xDBIA [C10]	O75691	UTP20_C1730	2356.27	106.4	69.8	125.5	116.7	102.6	79
[K].ESECITKPVSFLPQNK.[E]	2xTMT6plex [K7; K16]; 1xTMT6plex [N-Term]; 1xDBIA [C4]	O75691	UTP20_C1757	2803.6	84.5	85.4	123.7	98.4	131.2	76.8
[R].LPPQSCLLLPPTPVR.[G]	1xTMT6plex [N-Term]; 1xDBIA [C6]	O75691	UTP20_C2058	2156.28	99.1	79.2	127	87	124.3	83.5
[K].VLYLLELYCEDK.[Q]	1xTMT6plex [K12]; 1xTMT6plex [N-Term]; 1xDBIA [C9]	O75691	UTP20_C2571	2255.28	85.6	78.4	93.7	87.5	183.1	71.7
[R].VPLPPELVEQFGHMQCNCMMGVFPPISR.[A]	1xCarbamidomethyl [C18]; 1xTMT6plex [N-Term]; 1xDBIA [C16]	O75694	NU155_C102	3738.87	95	81.3	89.9	103.9	139	90.9
[R].YVENPSQVLNCER.[R]	1xTMT6plex [N-Term]; 1xDBIA [C11]	O75694	NU155_C1344	2076.07	88.5	77.2	135.4	99.7	122.9	76.3
[R].DNAAVDGISLHLQDICPLLYSTDDAICSK.[A]	1xCarbamidomethyl [C16]; 1xTMT6plex [K29]; 1xTMT6plex [N-Term]; 1xDBIA [C27]	O75694	NU155_C874	3902.01	78.4	73.5	101.7	82.7	183.9	79.9
[K].CITDTLQELVNQSK.[A]	1xTMT6plex [K14]; 1xTMT6plex [N-Term]; 1xDBIA [C1]	O75694	NU155_C974	2346.31	109.9	81	157.8	89.1	86.8	75.4
[R].GTGFDGDQCLGVQLLELGK.[K]	1xTMT6plex [K19]; 1xTMT6plex [N-Term]; 1xDBIA [C9]	O75717	WDHD1_C598	2704.47	102.1	76.3	119.3	91.4	131.1	79.7
[R].GLGNTWTPICNTR.[E]	1xTMT6plex [N-Term]; 1xDBIA [C10]	O75717	WDHD1_C662	1958.05	114.4	98.7	175.5	94.6	48.5	68.2
[K].LPYCQIATEK.[G]	1xTMT6plex [K10]; 1xTMT6plex [N-Term]; 1xDBIA [C4]	O75717	WDHD1_C716	1920.1	121.2	100.5	159.1	94.9	59.5	64.8
[K].MLALSCK.[L]	1xTMT6plex [K7]; 1xTMT6plex [N-Term]; 1xDBIA [C6]	O75717	WDHD1_C773	1519.91	118.3	90.4	140.7	96.4	79.2	75.1
[R].GPVLGPMVYAICYCPLPR.[L]	1xCarbamidomethyl [C12]; 1xTMT6plex [N-Term]; 1xDBIA [C14]	O75792	RNH2A_C52	2531.35	104.9	95.7	161.3	80.2	87.3	70.5
[R].DFTQPFIHCTDDSPDPCIEYELVLR.[K]	1xCarbamidomethyl [C9]; 1xTMT6plex [N-Term]; 1xDBIA [C17]	O75794	CD123_C159	3535.71	100	84.2	128.3	82.8	113.5	91.1
[R].CIQDFFKK.[H]	2xTMT6plex [K7; K8]; 1xTMT6plex [N-Term]; 1xDBIA [C1]	O75794	CD123_C212	2012.2	126.9	94	170	99.9	47.2	61.9
[K].EDLNCQEEEDPMNK.[L]	1xTMT6plex [K14]; 1xTMT6plex [N-Term]; 1xDBIA [C5]	O75821	EIF3G_C139	2448.18	94.6	77.6	81.8	75.5	203.3	67.3
[K].CVTSELLK.[G]	1xTMT6plex [K8]; 1xTMT6plex [N-Term]; 1xDBIA [C1]	O75821	EIF3G_C25	1646.99	128.9	90.6	141.8	97.8	70.5	70.4
[K].ITNSLTVLCSEK.[Q]	1xTMT6plex [K12]; 1xTMT6plex [N-Term]; 1xDBIA [C9]	O75822	EIF3J_C207	2062.2	109.7	102.6	110.3	97.7	94.7	84.9
[K].GAQVNAVNQNGCTPLHYAASK.[N]	1xTMT6plex [K21]; 1xTMT6plex [N-Term]; 1xDBIA [C12]	O75832	PSD10_C107	2897.55	112.8	102.7	164.6	94.6	62.8	62.5
[R].SSHSGNGCK.[N]	1xTMT6plex [K9]; 1xTMT6plex [N-Term]; 1xDBIA [C8]	O75845	SC5D_C285	1630.87	103.2	95.6	169.2	85.6	79.3	67.2
[K].DLAACIK.[G]	1xTMT6plex [K7]; 1xTMT6plex [N-Term]; 1xDBIA [C5]	O75874	IDHC_C379	1487.9	113.6	100.3	170.6	113.9	46.3	55.2
[R].LPIAVNGSLIYGVCAGK.[K]	1xTMT6plex [K17]; 1xTMT6plex [N-Term]; 1xDBIA [C14]	O75879	GATB_C170	2429.44	97.4	90.4	123.7	97.2	110.6	80.8
[K].ANCPYIVQFGSTDDPFLPWK.[E]	1xTMT6plex [K20]; 1xTMT6plex [N-Term]; 1xDBIA [C3]	O75884	RBBP9_C127	3052.6	99.1	88.7	126.7	107.2	93.2	85
[R].IENLELMSQHGCNAWK.[V]	1xTMT6plex [K16]; 1xTMT6plex [N-Term]; 1xDBIA [C12]	O75934	SPF27_C132	2627.38	68.8	79.5	150.6	93.5	135.7	71.9
[K].VGVGTCGIADKPMTQYQDTSK.[Y]	2xTMT6plex [K11; K21]; 1xTMT6plex [N-Term]; 1xDBIA [C6]	O75940	SPF30_C214	3182.72	101.7	80.7	143.7	109.6	93.4	71
[K].SCAEWVSLSK.[A]	1xTMT6plex [K10]; 1xTMT6plex [N-Term]; 1xDBIA [C2]	O75947	ATP5H_C101	1864.04	86.8	78.2	134.2	93.3	120.9	86.7
[R].ECLAETER.[N]	1xTMT6plex [N-Term]; 1xDBIA [C2]	O75956	CDKA2_C116	1475.77	80.3	75.3	147.1	93.4	136.1	67.8
[K].LTHAAPCMLFMK.[G]	1xTMT6plex [K12]; 1xTMT6plex [N-Term]; 1xDBIA [C7]	O76003	GLRX3_C146	2117.18	122.3	97.6	154.5	98.7	54.8	72
[K].LTHAAPCMLFMK.[G]	1xOxidation [M]; 1xTMT6plex [K12]; 1xTMT6plex [N-Term]; 1xDBIA [C7]	O76003	GLRX3_C146	2133.18	119.9	85.4	175.7	100.3	56.2	62.3
[R].EINDCIGGTVLNISK.[S]	1xTMT6plex [K15]; 1xTMT6plex [N-Term]; 1xDBIA [C5]	O76021	RL1D1_C197	2330.32	94.4	73.2	135.1	85.2	131.6	80.7
[K].AVDALLTHCK.[S]	1xTMT6plex [K10]; 1xTMT6plex [N-Term]; 1xDBIA [C9]	O76021	RL1D1_C47	1825.08	97.1	80.4	127.2	89.8	127.1	78.4
[K].CELNVTEDALK.[A]	1xTMT6plex [K11]; 1xTMT6plex [N-Term]; 1xDBIA [C1]	O76031	CLPX_C538	1989.11	84	63.3	125.9	91.8	130.1	104.9
[K].VVQMEQELQDLQSQLCAEQAQQQAR.[V]	1xTMT6plex [N-Term]; 1xDBIA [C16]	O76064	RNF8_C300	3426.73	91.9	83.8	103.7	92.3	147.9	80.4
[K].SVAWAPSGNLLATCSR.[D]	1xTMT6plex [N-Term]; 1xDBIA [C14]	O76071	CIAO1_C123	2158.16	123.9	84.5	124.7	94.9	102	70
[R].QYLPGNEQGVACSGSDPSWK.[C]	1xTMT6plex [K20]; 1xTMT6plex [N-Term]; 1xDBIA [C12]	O76071	CIAO1_C234	2877.46	100.1	81.8	144.6	92.8	114.3	66.3
[R].TIYDIAWCQLTGALATACGDDAIR.[V]	1xCarbamidomethyl [C18]; 1xTMT6plex [N-Term]; 1xDBIA [C8]	O76071	CIAO1_C261	3123.58	91.6	89.4	118.9	91.2	129.2	79.8
[K].ALLAMYTNQAEQCR.[K]	1xTMT6plex [N-Term]; 1xDBIA [C13]	O76094	SRP72_C323	2137.11	106.1	100.5	139.4	96.4	80.1	77.5
[K].GECFGGGGATVTTK.[E]	1xTMT6plex [K14]; 1xTMT6plex [N-Term]; 1xDBIA [C3]	O94761	RECQ4_C389	2039.1	114.3	91.3	178.1	100.6	57	58.6
[K].GCDHCQNPTAVR.[R]	1xCarbamidomethyl [C2]; 1xTMT6plex [N-Term]; 1xDBIA [C5]	O94762	RECQ5_C434	1882.92	100.6	97.4	146.3	88.7	100.8	66.1
[K].GSCPFQTATELMETTR.[I]	1xTMT6plex [N-Term]; 1xDBIA [C3]	O94762	RECQ5_C664	2297.15	94	92.1	145.9	94.2	86.8	86.9
[R].ALDCSSSIR.[Q]	1xTMT6plex [N-Term]; 1xDBIA [C4]	O94776	MTA2_C209	1476.8	114.7	81.1	127.3	105	107.8	64.1
[K].SPNIIFADADLDYAVEQAHQGVFFNQGQCCTAGSR.[I]	1xCarbamidomethyl [C29]; 1xTMT6plex [N-Term]; 1xDBIA [C30]	O94788	AL1A2_C320	4355.08	155.7	144.1	142.8	83.2	40.4	33.9
[K].LVLHYCK.[S]	1xTMT6plex [K7]; 1xTMT6plex [N-Term]; 1xDBIA [C6]	O94817	ATG12_C134	1629.99	108.3	97.4	162.9	92.9	66.2	72.3
[R].ACPEEPAAPSPEPR.[V]	1xTMT6plex [N-Term]; 1xDBIA [C2]	O94819	KBTBB_C99	1976.01	102.4	68.4	119.7	104.8	121.1	83.6
[K].ESFFPLTEGNLHTIQSLCPFLSK.[E]	1xTMT6plex [K23]; 1xTMT6plex [N-Term]; 1xDBIA [C18]	O94822	LTN1_C1131	3362.82	99.8	97.5	148.9	113.5	79	61.3
[K].CVSSEGEK.[I]	1xTMT6plex [K8]; 1xTMT6plex [N-Term]; 1xDBIA [C1]	O94822	LTN1_C555	1592.87	120.9	93.8	132.6	114.4	64.4	73.9
[K].THLPDFLICK.[L]	1xTMT6plex [K10]; 1xTMT6plex [N-Term]; 1xDBIA [C9]	O94822	LTN1_C869	1941.14	101.5	95.2	142.3	97.8	77.6	85.5
[R].LSLNYECFK.[T]	1xTMT6plex [K9]; 1xTMT6plex [N-Term]; 1xDBIA [C7]	O94822	LTN1_C981	1871.05	109.9	95.7	161.8	90.7	70.9	71
[K].ESEFCSSSNTR.[N]	1xTMT6plex [N-Term]; 1xDBIA [C5]	O94830	DDHD2_C470	1771.85	116.9	94.6	177.9	93	52.3	65.2
[K].GLYGGSSYVDFLCCVHK.[E]	1xCarbamidomethyl [C14]; 1xTMT6plex [K17]; 1xTMT6plex [N-Term]; 1xDBIA [C13]	O94855	SC24D_C1021	2659.38	115.1	97.2	181.8	90.2	62.6	53
[K].LCESLEELQNLNGK.[L]	1xTMT6plex [K14]; 1xTMT6plex [N-Term]; 1xDBIA [C2]	O94880	PHF14_C662	2344.29	107.1	84.5	145.8	82.5	104.3	75.7
[R].AVECCPTSVELWLALAR.[L]	1xCarbamidomethyl [C5]; 1xTMT6plex [N-Term]; 1xDBIA [C4]	O94906	PRP6_C429	2443.3	94.2	85.8	127	105.1	117.5	70.4
[K].CPHSTPLWLLLSR.[L]	1xTMT6plex [N-Term]; 1xDBIA [C1]	O94906	PRP6_C739	2048.17	108.6	84.2	106.8	102.3	112.4	85.7
[R].GEDLQFDQLISSMSSVAEHCLPSLLR.[T]	1xTMT6plex [N-Term]; 1xDBIA [C20]	O94915	FRYL_C70	3400.74	95.4	88.7	101.8	102.6	129	82.4
[K].AMQVESCSSAVGVSNR.[G]	1xTMT6plex [N-Term]; 1xDBIA [C7]	O94916	NFAT5_C108	2150.09	91.5	105	139.7	104	82.1	77.7
[K].FSPDLWGVSVCTVDGQR.[H]	1xTMT6plex [N-Term]; 1xDBIA [C11]	O94925	GLSK_C266	2391.23	102.5	75.2	126.3	88.9	115.7	91.4
[K].VPFCLQSCVKPLK.[Y]	1xCarbamidomethyl [C4]; 2xTMT6plex [K10; K13]; 1xTMT6plex [N-Term]; 1xDBIA [C8]	O94925	GLSK_C287	2502.49	92.4	78.4	116.8	100.7	129.4	82.3
[K].AAFNQEHVSCQQAFEHFAQK.[G]	1xTMT6plex [K20]; 1xTMT6plex [N-Term]; 1xDBIA [C10]	O94953	KDM4B_C547	3074.57	97.3	101.1	123.6	105.3	97.5	75.2
[K].LVACWTK.[A]	1xTMT6plex [K7]; 1xTMT6plex [N-Term]; 1xDBIA [C4]	O94979	SC31A_C704	1574.95	147	94.4	162.3	82.8	51.5	62
[K].VCLEFQDCGVGLNAAQFK.[Q]	1xCarbamidomethyl [C2]; 1xTMT6plex [K18]; 1xTMT6plex [N-Term]; 1xDBIA [C8]	O95059	RPP14_C31	2753.45	100.9	80.9	93.5	95.4	142.8	86.5
[K].VPDCFQR.[T]	1xTMT6plex [N-Term]; 1xDBIA [C4]	O95071	UBR5_C730	1389.75	124.4	92.1	158.8	95.2	66.3	63.2
[K].AEAEAASEVWCR.[R]	1xTMT6plex [N-Term]; 1xDBIA [C11]	O95081	AGFG2_C30	1846.93	121.8	93.9	163.2	97.3	55.8	68
[K].VKPEELESFCEGGMLDSDTLNPDWK.[G]	2xTMT6plex [K2; K25]; 1xTMT6plex [N-Term]; 1xDBIA [C10]	O95104	SCAF4_C616	3822.95	79.4	76.2	89.6	71.8	200.4	82.7
[R].QCFSLNYDLNCDK.[L]	1xCarbamidomethyl [C11]; 1xTMT6plex [K13]; 1xTMT6plex [N-Term]; 1xDBIA [C2]	O95140	MFN2_C521	2374.19	103	69.2	128.5	109.6	94.4	95.3
[R].GLFSANDWQCK.[T]	1xTMT6plex [K11]; 1xTMT6plex [N-Term]; 1xDBIA [C10]	O95218	ZRAB2_C71	2023.08	130.1	94.6	142.9	97.7	67.1	67.5
[K].LLCSQLQVADFLQNILAQEDTAK.[G]	1xTMT6plex [K23]; 1xTMT6plex [N-Term]; 1xDBIA [C3]	O95229	ZWINT_C54	3315.84	131.6	106.4	153.3	94.9	53.3	60.5
[R].ACCHSTGAGK.[L]	1xCarbamidomethyl [C2]; 1xTMT6plex [K10]; 1xTMT6plex [N-Term]; 1xDBIA [C3]	O95235	KI20A_C763	1745.92	98.5	95.9	149.1	101.8	82	72.6
[K].AACIAEQYHTVLK.[L]	1xTMT6plex [K13]; 1xTMT6plex [N-Term]; 1xDBIA [C3]	O95235	KI20A_C809	2201.25	97.4	99.3	143.6	96.6	95.4	67.7
[R].TPTCQSSTDCSPYAR.[I]	1xCarbamidomethyl [C10]; 1xTMT6plex [N-Term]; 1xDBIA [C4]	O95235	KI20A_C860	2199.04	93.4	103.7	155.4	92.9	72.4	82.2
[K].YCSEHSVNEHEDGDGDDDEGDDEEWKPTK.[L]	2xTMT6plex [K26; K29]; 1xTMT6plex [N-Term]; 1xDBIA [C2]	O95239	KIF4A_C1047	4320.94	117.1	104.4	156	90.2	67.4	65
[K].LEDPTEVTPGLSFFNPVCATPNSK.[I]	1xTMT6plex [K24]; 1xTMT6plex [N-Term]; 1xDBIA [C18]	O95239	KIF4A_C1159	3317.75	116.1	110.9	133.1	101.7	70.8	67.5
[K].EMCDVEQVLSK.[K]	1xTMT6plex [K11]; 1xTMT6plex [N-Term]; 1xDBIA [C3]	O95239	KIF4A_C1171	2035.1	111.9	99.5	147.7	99.3	72.7	68.8
[R].ALASNTSFFSGCSPIEEEAH.[-]	1xTMT6plex [N-Term]; 1xDBIA [C12]	O95239	KIF4A_C1224	2622.27	106.3	88.1	150.9	111	72.7	71
[R].GLLCLGNVISALGDDKK.[G]	2xTMT6plex [K16; K17]; 1xTMT6plex [N-Term]; 1xDBIA [C4]	O95239	KIF4A_C269	2699.61	103.5	87.6	139.9	96.3	89.6	83.1
[R].EVCEQNQQLLR.[E]	1xTMT6plex [N-Term]; 1xDBIA [C3]	O95239	KIF4A_C977	1885.02	108.7	90.8	126.3	100	96	78.3
[R].LLPGEECVLDGLR.[V]	1xTMT6plex [N-Term]; 1xDBIA [C7]	O95248	MTMR5_C896	1939.09	110.6	94.2	139.4	98.3	88.4	69.1
[K].DQVAQLDDIVDISDEISPSVDDLALSIYPPMCHLTVR.[I]	1xTMT6plex [N-Term]; 1xDBIA [C32]	O95273	CCDB1_C300	4608.34	98.5	102.8	127.4	118.1	97.3	56
[R].EQIDNLATELCR.[I]	1xTMT6plex [N-Term]; 1xDBIA [C11]	O95295	SNAPN_C66	1930.03	102.1	90.4	128.1	96.5	112.2	70.7
[R].AACCLAGAR.[A]	1xCarbamidomethyl [C4]; 1xTMT6plex [N-Term]; 1xDBIA [C3]	O95336	6PGL_C32	1417.76	109.2	119.6	130.3	106.7	66.5	67.7
[R].VQDLFCSVGLNVNNPHFLIMQGR.[I]	1xTMT6plex [N-Term]; 1xDBIA [C6]	O95347	SMC2_C132	3126.65	114	96.2	127.8	101.7	84.3	76
[K].KNLACEESK.[R]	2xTMT6plex [K1; K9]; 1xTMT6plex [N-Term]; 1xDBIA [C5]	O95347	SMC2_C326	2005.17	109.6	104.2	139.6	108.2	66.5	71.9
[R].GIDQCIPLFVEAALER.[L]	1xTMT6plex [N-Term]; 1xDBIA [C5]	O95373	IPO7_C757	2299.27	99.2	93.9	130.4	96.1	106.4	73.9
[R].AVACSK.[Y]	1xTMT6plex [K6]; 1xTMT6plex [N-Term]; 1xDBIA [C4]	O95391	SLU7_C416	1332.81	93.9	81.1	144.3	94.3	121.6	64.9
[K].QASCSGDEYR.[S]	1xTMT6plex [N-Term]; 1xDBIA [C4]	O95394	AGM1_C200	1640.79	136.1	79.9	158.6	97.8	63.7	63.9
[K].GLGCQTLGPHNPTPPPSLDMFAEELAEEELETPTPTQR.[G]	1xTMT6plex [N-Term]; 1xDBIA [C4]	O95400	CD2B2_C234	4628.29	88.7	82.5	138.1	94.2	126.5	70
[R].RLELLPSAESPVCWLEQPESHQR.[L]	1xTMT6plex [N-Term]; 1xDBIA [C13]	O95402	MED26_C340	3229.7	131.4	80.6	150.1	91.4	74.1	72.5
[K].CPVTIPEDQK.[K]	1xTMT6plex [K10]; 1xTMT6plex [N-Term]; 1xDBIA [C1]	O95453	PARN_C169	1884.07	108.1	84.7	143.3	100.6	84.2	79
[R].LNPQCIPYTLQNHYYR.[N]	1xTMT6plex [N-Term]; 1xDBIA [C5]	O95453	PARN_C543	2548.33	117.5	99.5	147.6	97.9	68	69.4
[K].AAAECFVQSYWEQYK.[F]	1xTMT6plex [K15]; 1xTMT6plex [N-Term]; 1xDBIA [C5]	O95455	TGDS_C175	2577.32	116	103.2	157.6	91.9	74.8	56.6
[K].VCFVGDGFTR.[K]	1xTMT6plex [N-Term]; 1xDBIA [C2]	O95478	NSA2_C154	1625.87	113.6	91.5	135.9	94.6	86.6	77.8
[K].ATFCLPILGVK.[K]	1xTMT6plex [K11]; 1xTMT6plex [N-Term]; 1xDBIA [C4]	O95478	NSA2_C193	1916.18	104.5	78.8	130.6	93	113.5	79.6
[K].GCDNNFIEDVLGYTNFASIPQK.[M]	1xTMT6plex [K22]; 1xTMT6plex [N-Term]; 1xDBIA [C2]	O95487	SC24B_C1175	3199.65	118.4	108.9	149.5	89.7	75	58.4
[K].ACVLQNPQTIMHIQDPASQR.[L]	1xTMT6plex [N-Term]; 1xDBIA [C2]	O95544	NADK_C79	2775.46	128.3	113.4	163.1	96	38.9	60.3
[R].TDFQQGCAK.[T]	1xTMT6plex [K9]; 1xTMT6plex [N-Term]; 1xDBIA [C7]	O95571	ETHE1_C170	1751.95	100.6	78.7	124.4	106	110.7	79.6
[R].LLLCGGAPLSATTQR.[F]	1xTMT6plex [N-Term]; 1xDBIA [C4]	O95573	ACSL3_C450	2026.17	85	61.4	125.4	79.7	149.6	99
[R].WLCTGDIGEFEPDGCLK.[I]	1xCarbamidomethyl [C15]; 1xTMT6plex [K17]; 1xTMT6plex [N-Term]; 1xDBIA [C3]	O95573	ACSL3_C561	2694.37	102.2	73.9	128.6	88.8	115.8	90.7
[R].VCLGEVLQK.[I]	1xTMT6plex [K9]; 1xTMT6plex [N-Term]; 1xDBIA [C2]	O95602	RPA1_C1289	1743.06	103.7	82	142.2	93.4	98.4	80.1
[R].SVICPDMYINTNEIGIPMVFATK.[L]	1xTMT6plex [K23]; 1xTMT6plex [N-Term]; 1xDBIA [C4]	O95602	RPA1_C446	3310.77	93	81.9	123.5	97.2	117.6	86.7
[R].LHYANCK.[A]	1xTMT6plex [K7]; 1xTMT6plex [N-Term]; 1xDBIA [C6]	O95602	RPA1_C582	1602.92	91.5	103.8	145	103.4	80.8	75.5
[R].AEAYVLACTDQQYLVPK.[D]	1xTMT6plex [K17]; 1xTMT6plex [N-Term]; 1xDBIA [C8]	O95602	RPA1_C613	2666.46	94	87.9	121.3	90.6	124.7	81.6
[K].SLPCFEPYEFTPR.[A]	1xTMT6plex [N-Term]; 1xDBIA [C4]	O95602	RPA1_C937	2111.08	101	80.5	135.5	105.2	90.2	87.6
[K].GAVSSHEAVVDLSGFCK.[A]	1xTMT6plex [K17]; 1xTMT6plex [N-Term]; 1xDBIA [C16]	O95625	ZBT11_C262	2460.33	85.7	90.6	156.7	86.5	113	67.5
[K].ECPFLHIDPESK.[I]	1xTMT6plex [K12]; 1xTMT6plex [N-Term]; 1xDBIA [C2]	O95639	CPSF4_C110	2169.18	97.7	72.7	133.4	97.2	120.2	78.7
[K].GGMCPFR.[H]	1xTMT6plex [N-Term]; 1xDBIA [C4]	O95639	CPSF4_C55	1292.68	106.4	87.1	170.7	87.1	71.6	77.1
[K].AEAGEAGQATAEAECHR.[T]	1xTMT6plex [N-Term]; 1xDBIA [C15]	O95671	ASML_C274	2226.08	104.2	95.4	130.3	99.1	104.3	66.7
[R].DDHEELAWPGIMESFFTGQNCR.[N]	1xTMT6plex [N-Term]; 1xDBIA [C21]	O95714	HERC2_C1201	3107.46	86.1	84.8	137.2	99.4	111.3	81.2
[R].DGLCGLWNEMVK.[D]	1xTMT6plex [K12]; 1xTMT6plex [N-Term]; 1xDBIA [C4]	O95714	HERC2_C33	2119.14	115.7	80.9	133.8	107.9	86.3	75.4
[K].LMSANASDLPLNIECFMNDLDVSSK.[M]	1xTMT6plex [K25]; 1xTMT6plex [N-Term]; 1xDBIA [C15]	O95757	HS74L_C290	3481.78	111.5	93.8	124.8	90.8	95.6	83.5
[K].CHAEHTPEEEIDHTGAK.[T]	1xTMT6plex [K17]; 1xTMT6plex [N-Term]; 1xDBIA [C1]	O95757	HS74L_C540	2658.33	111.4	75.9	179.3	111.1	57.9	64.5
[K].SIDLPIQSSLCR.[Q]	1xTMT6plex [N-Term]; 1xDBIA [C11]	O95757	HS74L_C589	1857.05	115.8	87.6	157.7	100	68.8	70.1
[K].IPCDVTEAEIISLGLPFGK.[V]	1xTMT6plex [K19]; 1xTMT6plex [N-Term]; 1xDBIA [C3]	O95758	PTBP3_C68	2756.57	97.7	88.3	124	88.1	124.9	77.1
[K].SKPCLIK.[K]	2xTMT6plex [K2; K7]; 1xTMT6plex [N-Term]; 1xDBIA [C4]	O95785	WIZ_C1279	1772.14	113	78.3	122.6	106.9	100.8	78.4
[R].TGNGPMSVCGR.[C]	1xTMT6plex [N-Term]; 1xDBIA [C9]	O95793	STAU1_C574	1603.82	136.2	96.1	147	103.2	52.7	64.8
[R].ENPDLACLQSIIFDEER.[S]	1xTMT6plex [N-Term]; 1xDBIA [C7]	O95801	TTC4_C63	2517.29	102.7	85.1	108.3	86.8	138.3	78.8
[R].ENPDLACLQSIIFDEERSPEEQAK.[T]	1xTMT6plex [K24]; 1xTMT6plex [N-Term]; 1xDBIA [C7]	O95801	TTC4_C63	3515.81	96.4	85.8	104	97.6	144.4	71.9
[K].QCGQVAAAAAAQPPASHGPER.[S]	1xTMT6plex [N-Term]; 1xDBIA [C2]	O95817	BAG3_C151	2542.31	125.6	101.4	142.9	94.9	65.4	69.9
[R].GMPETTQPDKQCGQVAAAAAAQPPASHGPER.[S]	1xTMT6plex [K10]; 1xTMT6plex [N-Term]; 1xDBIA [C12]	O95817	BAG3_C151	3855.96	91.3	101.6	121.2	91.4	109.9	84.6
[R].SQSPAASDCSSSSSSASLPSSGR.[S]	1xTMT6plex [N-Term]; 1xDBIA [C9]	O95817	BAG3_C179	2668.27	133.3	90.9	157.1	94.8	70.7	53.1
[R].LLQISPSSGTTVTSVVGFSCDGMRPEAIR.[Q]	1xTMT6plex [N-Term]; 1xDBIA [C20]	O95819	M4K4_C883	3533.87	122.3	109.3	146.1	97.2	63.8	61.3
[K].YLCILK.[D]	1xTMT6plex [K6]; 1xTMT6plex [N-Term]; 1xDBIA [C3]	O95825	QORL1_C302	1506.95	121.7	98.9	158.1	89.9	59.6	71.9
[K].TCATDLQTK.[A]	1xTMT6plex [K9]; 1xTMT6plex [N-Term]; 1xDBIA [C2]	O95861	BPNT1_C42	1734.98	127	119.4	160	83	52.7	57.9
[K].SWCGACK.[A]	1xCarbamidomethyl [C6]; 1xTMT6plex [K7]; 1xTMT6plex [N-Term]; 1xDBIA [C3]	O95881	TXD12_C66	1565.83	113.4	87.9	163.2	93.1	78.6	63.7
[K].GLQGVGPGCTDETLLSAIASALHTSTMPITGQLSAAVEK.[N]	1xTMT6plex [K39]; 1xTMT6plex [N-Term]; 1xDBIA [C9]	O95983	MBD3_C172	4579.45	68.3	83.8	102	75.9	186.8	83.2
[K].NPGVWLNTTQPLCK.[A]	1xTMT6plex [K14]; 1xTMT6plex [N-Term]; 1xDBIA [C13]	O95983	MBD3_C215	2325.32	99.4	82.2	136.2	77.5	111.6	93.1
[K].ACAEDDDEEDEEEEEEEPDPDPEMEHV.[-]	1xTMT6plex [N-Term]; 1xDBIA [C2]	O95983	MBD3_C266	3686.45	88.2	65.6	119	80.9	167.5	78.7
[R].GAPSPGVLGPHASEPQLAPPACTPAAPAVPGPPGPR.[S]	1xTMT6plex [N-Term]; 1xDBIA [C22]	O96013	PAK4_C276	3844.05	75.5	72.8	124.1	83.4	166.9	77.4
[R].RPKPLVDPACITSIQPGAPK.[T]	2xTMT6plex [K3; K20]; 1xTMT6plex [N-Term]; 1xDBIA [C10]	O96013	PAK4_C58	3071.84	103.2	86	138.1	98.1	93.4	81.3
[K].TLGSGACGEVK.[L]	1xTMT6plex [K11]; 1xTMT6plex [N-Term]; 1xDBIA [C7]	O96017	CHK2_C231	1776.01	121.4	104.8	146.9	98.8	61.3	66.8
[K].SPLAGDFITMQCR.[E]	1xTMT6plex [N-Term]; 1xDBIA [C12]	O96019	ACL6A_C206	1964.03	99.7	89.4	142.3	101.1	92.3	75.2
[R].VGLFAVCDIPAGTELTFNYNLDCLGNEK.[T]	1xCarbamidomethyl [C7]; 1xTMT6plex [K28]; 1xTMT6plex [N-Term]; 1xDBIA [C23]	O96028	NSD2_C1183	3827.98	82	67.4	103.6	92.6	170.5	83.9
[R].SYCCEHDLGAASVR.[S]	1xCarbamidomethyl [C3]; 1xTMT6plex [N-Term]; 1xDBIA [C4]	O96028	NSD2_C1324	2093.01	103.1	71.9	149	84.6	112.7	78.7
[K].LCSSAETLESHPDIGK.[S]	1xTMT6plex [K16]; 1xTMT6plex [N-Term]; 1xDBIA [C2]	O96028	NSD2_C406	2441.31	87.6	96.4	130.1	99.2	103.2	83.5
[R].ECSVFLSK.[A]	1xTMT6plex [K8]; 1xTMT6plex [N-Term]; 1xDBIA [C2]	O96028	NSD2_C44	1666.96	126.2	93.3	157	97.3	63.9	62.3
[K].YSPNCK.[L]	1xTMT6plex [K6]; 1xTMT6plex [N-Term]; 1xDBIA [C5]	P00338	LDHA_C131	1465.82	142.1	79.4	157.8	97.6	67.6	55.5
[K].GLYGIKDDVFLSVPCILGQNGISDLVK.[V]	2xTMT6plex [K6; K27]; 1xTMT6plex [N-Term]; 1xDBIA [C15]	P00338	LDHA_C293	3847.2	118	104.3	191.3	61.9	47.8	76.7
[K].DDVFLSVPCILGQNGISDLVK.[V]	1xTMT6plex [K21]; 1xTMT6plex [N-Term]; 1xDBIA [C9]	P00338	LDHA_C293	2986.67	104.7	85.9	116.4	97.9	120.8	74.3
[K].AKPYEGSILEADCDILIPAASEK.[Q]	2xTMT6plex [K2; K23]; 1xTMT6plex [N-Term]; 1xDBIA [C13]	P00367	DHE3_C376	3416.9	51.4	62.4	64.8	59.8	297	64.6
[K].LGGTCVNVGCVPK.[K]	1xCarbamidomethyl [C10]; 1xTMT6plex [K13]; 1xTMT6plex [N-Term]; 1xDBIA [C5]	P00390	GSHR_C102	2058.16	116.7	96.2	139.3	110.3	60.6	77
[K].DGVADVSIEDSVISLSGDHCIIGR.[T]	1xTMT6plex [N-Term]; 1xDBIA [C20]	P00441	SODC_C112	2982.54	89.4	95.7	144.1	96.9	103.1	70.8
[R].LACGVIGIAQ.[-]	1xTMT6plex [N-Term]; 1xDBIA [C3]	P00441	SODC_C147	1469.87	103.2	106.6	170.8	98.8	68.5	52
[R].ELQEGTYVMVAGPSFETVAECR.[V]	1xTMT6plex [N-Term]; 1xDBIA [C21]	P00491	PNPH_C206	2941.46	117	87.3	156.5	91.2	77.6	70.4
[K].HRPQVAIICGSGLGGLTDK.[L]	1xTMT6plex [K19]; 1xTMT6plex [N-Term]; 1xDBIA [C9]	P00491	PNPH_C31	2676.54	111.9	95	135.7	94	81.7	81.7
[K].SYCNDQSTGDIK.[V]	1xTMT6plex [K12]; 1xTMT6plex [N-Term]; 1xDBIA [C3]	P00492	HPRT_C106	2085.07	128.2	93.6	163.5	91.7	59.1	63.9
[K].EYLPIGGLAEFCK.[A]	1xTMT6plex [K13]; 1xTMT6plex [N-Term]; 1xDBIA [C12]	P00505	AATM_C106	2194.23	97.1	79.6	126	87	122.8	87.5
[K].ACANPAAGSVILLENLR.[F]	1xTMT6plex [N-Term]; 1xDBIA [C2]	P00558	PGK1_C108	2237.26	115.5	93	151.8	88.5	76	75.1
[K].FCLDNGAK.[S]	1xTMT6plex [K8]; 1xTMT6plex [N-Term]; 1xDBIA [C2]	P00558	PGK1_C50	1621.91	129.1	90.9	162.4	98.5	56.2	62.9
[K].DCVGPEVEK.[A]	1xTMT6plex [K9]; 1xTMT6plex [N-Term]; 1xDBIA [C2]	P00558	PGK1_C99	1729.96	123.6	92.6	159.5	97.5	65.3	61.5
[K].GTQCEK.[IL]	1xTMT6plex [K6]; 1xTMT6plex [N-Term]; 1xDBIA [C4]	P00568	KAD1_C25	1419.8	102.3	78.5	185.3	100.9	72	61
[K].CNLLAEK.[Q]	1xTMT6plex [K7]; 1xTMT6plex [N-Term]; 1xDBIA [C1]	P02765	FETUA_C219	1544.92	195	91.1	183.5	51.8	45.3	33.3
[K].YICENQDSISSK.[L]	1xTMT6plex [K12]; 1xTMT6plex [N-Term]; 1xDBIA [C3]	P02768	ALBU_C289	2141.13	176.1	77	230.6	50.1	32.3	33.9
[K].EFQVPMATTEGCLVASTNR.[G]	1xTMT6plex [N-Term]; 1xDBIA [C12]	P04035	HMDH_C561	2579.32	99.8	94.7	118.6	105.6	114.6	66.8
[K].INLQDLQGACTK.[K]	1xTMT6plex [K12]; 1xTMT6plex [N-Term]; 1xDBIA [C10]	P04035	HMDH_C883	2058.18	106.6	91.1	125.9	102.7	97.5	76.3
[R].LGPNYLHIPVNCPYR.[A]	1xTMT6plex [N-Term]; 1xDBIA [C12]	P04040	CATA_C377	2281.25	108.3	86.3	140	94.3	99.3	71.8
[K].DAVFDGSSCISPTIVQQFGYQR.[R]	1xTMT6plex [N-Term]; 1xDBIA [C9]	P04049	RAF1_C27	2943.49	118.9	111.5	161.6	93.5	65.2	49.2
[R].AAHTEDINACTLTTSPR.[L]	1xTMT6plex [N-Term]; 1xDBIA [C10]	P04049	RAF1_C637	2326.2	108	100.1	135.4	96.6	79.2	80.7
[R].GLQPECCAVFR.[L]	1xCarbamidomethyl [C7]; 1xTMT6plex [N-Term]; 1xDBIA [C6]	P04049	RAF1_C95	1804.94	93.2	115	131.4	110	68.3	82.2
[R].VPMASCDFSIR.[T]	1xTMT6plex [N-Term]; 1xDBIA [C6]	P04062	GBA1_C165	1750.92	100.2	88.5	132.3	88	113.9	77.1
[R].ALANSLACQGK.[Y]	1xTMT6plex [K11]; 1xTMT6plex [N-Term]; 1xDBIA [C8]	P04075	ALDOA_C339	1830.07	140.9	88.8	143.6	89.2	77.5	60.2
[K].LGTVYCQASFPGANIIGNK.[M]	1xTMT6plex [K19]; 1xTMT6plex [N-Term]; 1xDBIA [C6]	P04150	GCR_C302	2707.5	133.9	102	185.2	93.2	38	47.6
[K].VLPMNTGVEAGETACK.[L]	1xOxidation [M4]; 1xTMT6plex [K16]; 1xTMT6plex [N-Term]; 1xDBIA [C15]	P04181	OAT_C150	2390.28	81.1	79.1	104.1	97.1	157.4	81.2
[R].CSDSDGLAPPQHLIR.[V]	1xTMT6plex [N-Term]; 1xDBIA [C1]	P04637	P53_C182	2134.13	112.5	68.9	137.2	104.4	97.2	79.8
[R].QLFALSCTAEEQGVLPDDLSGVIR.[R]	1xTMT6plex [N-Term]; 1xDBIA [C7]	P04899	GNAI2_C112	3086.64	86.9	68.6	92.3	90.3	182.7	79.2
[R].CSSILLHGK.[E]	1xTMT6plex [K9]; 1xTMT6plex [N-Term]; 1xDBIA [C1]	P05023	AT1A1_C518	1712.03	99.4	88.6	141.9	94.2	95.2	80.7
[K].ANYLSQALQAGTVWVNCYDVFGAQSPFGGYK.[M]	1xTMT6plex [K31]; 1xTMT6plex [N-Term]; 1xDBIA [C17]	P05091	ALDH2_C472	4109.1	80.2	92.2	104.6	110	135.1	77.9
[R].KGTDIMYTGTLDCWR.[K]	1xTMT6plex [K1]; 1xTMT6plex [N-Term]; 1xDBIA [C13]	P05141	ADT2_C257	2514.32	119.7	85.8	160.5	91.9	76.5	65.5
[K].GTDIMYTGTLDCWR.[K]	1xTMT6plex [N-Term]; 1xDBIA [C12]	P05141	ADT2_C257	2157.07	107	80.8	160.2	83.5	97.3	71.2
[K].GTDIMYTGTLDCWR.[K]	1xOxidation [M5]; 1xTMT6plex [N-Term]; 1xDBIA [C12]	P05141	ADT2_C257	2173.06	103.5	78.9	150.8	95	102.3	69.5
[R].ICCDLDVLASK.[K]	1xCarbamidomethyl [C2]; 1xTMT6plex [K11]; 1xTMT6plex [N-Term]; 1xDBIA [C3]	P05166	PCCB_C517	1991.11	100.2	73.5	139.6	97	109.3	80.5
[K].ALANVNIGSLICNVGAGGPAPAAGAAPAGGPAPSTAAAPAEEK.[K]	1xTMT6plex [K43]; 1xTMT6plex [N-Term]; 1xDBIA [C12]	P05386	RLA1_C61	4506.42	72.8	99.7	150.2	95.5	119.2	62.6
[R].AGAIAPCEVTVPAQNTGLGPEK.[T]	1xTMT6plex [K22]; 1xTMT6plex [N-Term]; 1xDBIA [C7]	P05388	RLA0_C119	2877.59	100.8	87	120.2	87.8	129.1	75.2
[K].CFIVGADNVGSK.[Q]	1xTMT6plex [K12]; 1xTMT6plex [N-Term]; 1xDBIA [C1]	P05388	RLA0_C27	1964.1	126.9	94.1	170	87.9	55.2	65.9
[R].LIIQSSNGHITTTPTPTQFLCPK.[N]	1xTMT6plex [K23]; 1xTMT6plex [N-Term]; 1xDBIA [C21]	P05412	JUN_C99	3251.82	78.3	90.5	115.4	95.7	137.5	82.7
[K].ICHQIEYYFGDFNLPR.[D]	1xTMT6plex [N-Term]; 1xDBIA [C2]	P05455	LA_C18	2540.3	86.5	95.9	148.3	106.1	75	88.2
[R].AAWGEETDYTPVWCMR.[Q]	1xTMT6plex [N-Term]; 1xDBIA [C14]	P06132	DCUP_C35	2440.16	124.9	99.1	169.4	76	65.2	65.4
[R].AAQDFFSTCR.[S]	1xTMT6plex [N-Term]; 1xDBIA [C9]	P06132	DCUP_C59	1670.85	112.5	88.2	177.2	81.5	77.2	63.4
[R].SPEACCELTLQPLR.[R]	1xCarbamidomethyl [C5]; 1xTMT6plex [N-Term]; 1xDBIA [C6]	P06132	DCUP_C66	2142.12	112.9	113.6	126.9	93.6	79.9	73
[K].AVGQGCVEIGSQR.[Y]	1xTMT6plex [N-Term]; 1xDBIA [C6]	P06400	RB_C438	1828.99	103.7	95	126.2	97.3	101.4	76.4
[K].IAIWTTECENR.[E]	1xTMT6plex [N-Term]; 1xDBIA [C8]	P06730	IF4E_C170	1860.98	112.7	88.9	130.6	102.6	77.1	88.2
[K].FGANAILGVSLAVCK.[A]	1xTMT6plex [K15]; 1xTMT6plex [N-Term]; 1xDBIA [C14]	P06733	ENOA_C119	2217.32	114	90.1	142.4	101.4	78	74
[R].SGETEDTFIADLVVGLCTGQIK.[T]	1xTMT6plex [K22]; 1xTMT6plex [N-Term]; 1xDBIA [C17]	P06733	ENOA_C389	3050.65	111.3	94	105.4	100.9	122.6	65.7
[K].TGAPCR.[S]	1xTMT6plex [N-Term]; 1xDBIA [C5]	P06733	ENOA_C399	1129.63	125.6	105.6	140	105.2	52.9	70.8
[K].MIPCDFLIPVQTQHPIRK.[G]	1xTMT6plex [K18]; 1xTMT6plex [N-Term]; 1xDBIA [C4]	P06744	G6PI_C404	2890.66	130.5	94.3	171.9	81.5	53.1	68.8
[K].MIPCDFLIPVQTQHPIRK.[G]	1xOxidation [M1]; 1xTMT6plex [K18]; 1xTMT6plex [N-Term]; 1xDBIA [C4]	P06744	G6PI_C404	2906.65	110.5	100.5	146	102.5	67.8	72.8
[K].CGSGPVHISGQHLVAVEEDAESEDEEEEDVK.[L]	1xTMT6plex [K31]; 1xTMT6plex [N-Term]; 1xDBIA [C1]	P06748	NPM_C104	4077.96	91.5	75.4	142.2	96.2	114.1	80.6
[K].GMYGIENEVFLSLPCILNAR.[G]	1xTMT6plex [N-Term]; 1xDBIA [C15]	P07195	LDHB_C294	2764.47	110.9	102.8	144	89.7	77.6	75
[K].GMYGIENEVFLSLPCILNAR.[G]	1xOxidation [M2]; 1xTMT6plex [N-Term]; 1xDBIA [C15]	P07195	LDHB_C294	2780.47	124.4	89.4	146	85.8	83.3	71.1
[K].ITVVGVGQVGMACAISILGK.[S]	1xTMT6plex [K20]; 1xTMT6plex [N-Term]; 1xDBIA [C13]	P07195	LDHB_C36	2670.58	114.1	95.1	135.5	100.9	86.4	68.1
[R].HGVVSCSGVAR.[A]	1xTMT6plex [N-Term]; 1xDBIA [C6]	P07199	CENPB_C135	1596.88	96.2	89.9	151.1	83.3	98.3	81.3
[R].AGQAGLPCDYTANSK.[G]	1xTMT6plex [K15]; 1xTMT6plex [N-Term]; 1xDBIA [C8]	P07199	CENPB_C259	2250.2	108.2	84.7	146.1	91.9	93.6	75.5
[R].RFQTIDIEPDIEALLSQGPSCA.[-]	1xTMT6plex [N-Term]; 1xDBIA [C21]	P07203	GPX1_C202	2928.53	125.7	66.7	139.9	89.8	102.7	75.2
[R].FQTIDIEPDIEALLSQGPSCA.[-]	1xTMT6plex [N-Term]; 1xDBIA [C20]	P07203	GPX1_C202	2772.43	115.3	79.6	134.6	80.9	115.7	73.9
[K].LLDIACWIHHK.[Y]	1xTMT6plex [K11]; 1xTMT6plex [N-Term]; 1xDBIA [C6]	P07339	CATD_C117	2103.23	97.4	97.5	203	99.1	48.8	54.2
[K].AIGAVPLIQGEYMIPCEK.[V]	1xTMT6plex [K18]; 1xTMT6plex [N-Term]; 1xDBIA [C16]	P07339	CATD_C329	2686.51	107.1	93.7	147.9	97.1	85	69.1
[K].GLGTDEDSLIEIICSR.[T]	1xTMT6plex [N-Term]; 1xDBIA [C14]	P07355	ANXA2_C133	2246.19	118.2	64.3	133.1	81.3	131.1	72.1
[K].GDLENAFLNLVQCIQNKPLYFADR.[L]	1xTMT6plex [K17]; 1xTMT6plex [N-Term]; 1xDBIA [C13]	P07355	ANXA2_C262	3535.91	75.8	74.1	86.1	76.5	210.7	76.8
[K].CYEMASHLR.[R]	1xTMT6plex [N-Term]; 1xDBIA [C1]	P07737	PROF1_C128	1634.83	129.7	94.3	155.1	80.9	65.8	74.2
[R].VVVVDDLLATGGTMNAACELLGR.[L]	1xTMT6plex [N-Term]; 1xDBIA [C18]	P07741	APT_C140	2842.54	113.2	94.5	126	90.4	108.1	67.8
[R].VVVVDDLLATGGTMNAACELLGR.[L]	1xOxidation [M14]; 1xTMT6plex [N-Term]; 1xDBIA [C18]	P07741	APT_C140	2858.53	109.1	91.7	134.2	93.7	102.1	69.2
[R].GFLFGPSLAQELGLGCVLIR.[K]	1xTMT6plex [N-Term]; 1xDBIA [C16]	P07741	APT_C83	2615.49	117.8	95.8	117.3	91.3	102	75.8
[K].LNQWCNVVR.[W]	1xTMT6plex [N-Term]; 1xDBIA [C5]	P07814	SYEP_C1148	1656.92	126.6	88.5	154.5	84.1	65.9	80.3
[R].VACVQVVIIPCGITNALSEEDK.[E]	1xCarbamidomethyl [C11]; 1xTMT6plex [K22]; 1xTMT6plex [N-Term]; 1xDBIA [C3]	P07814	SYEP_C1301	3112.72	109.7	92.6	129.5	104.7	92.1	71.4
[K].SCQFVAVR.[R]	1xTMT6plex [N-Term]; 1xDBIA [C2]	P07814	SYEP_C1377	1434.81	124.7	84.3	178.3	94.6	57.8	60.3
[K].GSQFGQSCCLR.[A]	1xCarbamidomethyl [C8]; 1xTMT6plex [N-Term]; 1xDBIA [C9]	P07814	SYEP_C337	1767.88	105.5	90.5	149.2	99.3	79.2	76.2
[K].HEELMLGDPCLK.[D]	1xTMT6plex [K12]; 1xTMT6plex [N-Term]; 1xDBIA [C10]	P07814	SYEP_C660	2139.17	109.5	82.5	142.3	105.3	86	74.3
[K].EAPCVLIYIPDGHTK.[E]	1xTMT6plex [K15]; 1xTMT6plex [N-Term]; 1xDBIA [C4]	P07814	SYEP_C697	2410.36	111.7	96.6	156.3	90.4	76.4	68.6
[K].ERPTPSLNNNCTTSEDSLVLYNR.[V]	1xTMT6plex [N-Term]; 1xDBIA [C11]	P07814	SYEP_C744	3148.59	105.4	76.9	141	110.8	96.5	69.4
[K].INEAVECLLSLK.[A]	1xTMT6plex [K12]; 1xTMT6plex [N-Term]; 1xDBIA [C7]	P07814	SYEP_C856	2086.23	112.3	94.6	126	95.5	97.8	73.8
[K].LSSCDSFTSTINELNHCLSLR.[T]	1xCarbamidomethyl [C17]; 1xTMT6plex [N-Term]; 1xDBIA [C4]	P07814	SYEP_C92	2922.47	94.6	92.5	154.3	84	103.7	70.8
[K].ICEPGYSPTYK.[Q]	1xTMT6plex [K11]; 1xTMT6plex [N-Term]; 1xDBIA [C2]	P07858	CATB_C211	2012.09	133.7	88.6	178.6	96.8	43.3	59
[R].VFIMDNCEELIPEYLNFIR.[G]	1xOxidation [M4]; 1xTMT6plex [N-Term]; 1xDBIA [C7]	P07900	HS90A_C374	2899.49	107.5	97.1	87.5	101.9	124.6	81.4
[K].CLELFTELAEDKENYK.[K]	2xTMT6plex [K12; K16]; 1xTMT6plex [N-Term]; 1xDBIA [C1]	P07900	HS90A_C420	2928.6	126.3	100	137.5	95.6	69.7	71
[K].HGLEVIYMIEPIDEYCVQQLK.[E]	1xTMT6plex [K21]; 1xTMT6plex [N-Term]; 1xDBIA [C16]	P07900	HS90A_C529	3274.76	106.7	86.9	130.1	98.8	99.8	77.8
[R].EQCEQLEK.[C]	1xTMT6plex [K8]; 1xTMT6plex [N-Term]; 1xDBIA [C3]	P07919	QCR6_C37	1760.96	68.9	91.3	148.3	97.5	130.1	64
[R].ERLELCDER.[V]	1xTMT6plex [N-Term]; 1xDBIA [C6]	P07919	QCR6_C53	1687.9	92.6	97	147.9	88.2	102.2	72.2
[R].QRQEVCQSYK.[S]	1xTMT6plex [K10]; 1xTMT6plex [N-Term]; 1xDBIA [C6]	P08133	ANXA6_C59	2023.12	99.1	101.2	122.2	79.7	112.8	85
[R].ISAFGYLECSAK.[T]	1xTMT6plex [K12]; 1xTMT6plex [N-Term]; 1xDBIA [C9]	P08134	RHOC_C159	2043.13	107.1	81.4	121.2	110.6	92.3	87.4
[R].MGVEAVMALLEGTPDTPACVVSLSGNQAVR.[L]	1xTMT6plex [N-Term]; 1xDBIA [C19]	P08237	PFKAM_C334	3540.84	92.8	58.3	122	118.7	120.9	87.2
[R].LPLMECVQVTK.[D]	1xTMT6plex [K11]; 1xTMT6plex [N-Term]; 1xDBIA [C6]	P08237	PFKAM_C351	2015.18	104.9	86.1	124.2	99.5	107	78.4
[R].RVFIMDSCDELIPEYLNFIR.[G]	1xTMT6plex [N-Term]; 1xDBIA [C8]	P08238	HS90B_C366	2998.57	126.3	84.5	133.8	108.3	74.2	73
[R].VFIMDSCDELIPEYLNFIR.[G]	1xTMT6plex [N-Term]; 1xDBIA [C7]	P08238	HS90B_C366	2842.47	109.8	89.8	121.7	93.3	120.9	64.5
[R].VFIMDSCDELIPEYLNFIR.[G]	1xOxidation [M4]; 1xTMT6plex [N-Term]; 1xDBIA [C7]	P08238	HS90B_C366	2858.47	101	84	147.3	83.8	115.5	68.5
[R].GFEVVYMTEPIDEYCVQQLK.[E]	1xOxidation [M7]; 1xTMT6plex [K20]; 1xTMT6plex [N-Term]; 1xDBIA [C15]	P08238	HS90B_C521	3161.63	104.6	99.2	116.5	77.6	123.1	78.9
[K].AMTEDGFLAVCSEAK.[G]	1xTMT6plex [K15]; 1xTMT6plex [N-Term]; 1xDBIA [C11]	P08243	ASNS_C158	2326.22	108.1	96.4	117.2	89.7	114.5	74.1
[R].IGCLLSGGLDSSLVAATLLK.[Q]	1xTMT6plex [K20]; 1xTMT6plex [N-Term]; 1xDBIA [C3]	P08243	ASNS_C255	2685.6	121.5	101.4	142.7	93.6	64.3	76.4
[R].RQVQSLTCEVDALK.[G]	1xTMT6plex [K14]; 1xTMT6plex [N-Term]; 1xDBIA [C8]	P08670	VIME_C328	2344.34	100.3	85.2	104.9	83.2	138.8	87.6
[R].QVQSLTCEVDALKGTNESLER.[Q]	1xTMT6plex [K13]; 1xTMT6plex [N-Term]; 1xDBIA [C7]	P08670	VIME_C328	3074.66	99.5	71.1	116	88.2	136.8	88.4
[R].QVQSLTCEVDALK.[G]	1xTMT6plex [K13]; 1xTMT6plex [N-Term]; 1xDBIA [C7]	P08670	VIME_C328	2188.24	91.7	68.2	108.9	78.1	172.9	80.1
[R].DCLIPMGITSENVAER.[F]	1xTMT6plex [N-Term]; 1xDBIA [C2]	P09110	THIK_C177	2273.18	106	79.1	129.5	93.5	108	83.9
[K].GCFQAEIVPVTTTVHDDK.[G]	1xTMT6plex [K18]; 1xTMT6plex [N-Term]; 1xDBIA [C2]	P09110	THIK_C218	2714.46	91.2	72.5	140.3	86.8	130.5	78.7
[K].ASCLYGQLPK.[F]	1xTMT6plex [K10]; 1xTMT6plex [N-Term]; 1xDBIA [C3]	P09211	GSTP1_C48	1834.07	140.4	99	152.4	71.1	80.4	56.7
[K].RLDEDLAAYCR.[R]	1xTMT6plex [N-Term]; 1xDBIA [C10]	P09543	CN37_C111	1849.98	85.6	84.1	129.5	110.5	105.8	84.4
[R].LDCAQLK.[E]	1xTMT6plex [K7]; 1xTMT6plex [N-Term]; 1xDBIA [C3]	P09543	CN37_C158	1544.92	82.1	75.7	154.2	106.3	97.2	84.6
[K].VCSTNDLK.[E]	1xTMT6plex [K8]; 1xTMT6plex [N-Term]; 1xDBIA [C2]	P09874	PARP1_C256	1633.93	114.2	82.2	142	97.5	86.5	77.6
[R].VADGMVFGALLPCEECSGQLVFK.[S]	1xCarbamidomethyl [C13]; 1xTMT6plex [K23]; 1xTMT6plex [N-Term]; 1xDBIA [C16]	P09874	PARP1_C298	3224.69	89.5	81.6	94.6	102.7	140	91.6
[K].ASLCISTK.[K]	1xTMT6plex [K8]; 1xTMT6plex [N-Term]; 1xDBIA [C4]	P09874	PARP1_C429	1576.95	109.9	85.3	147.2	84.2	93.4	80
[K].IEREGECQR.[Y]	1xTMT6plex [N-Term]; 1xDBIA [C7]	P09874	PARP1_C845	1644.87	103.8	76.4	140.3	103.2	90.4	86
[R].YIFDAECALEK.[L]	1xTMT6plex [K11]; 1xTMT6plex [N-Term]; 1xDBIA [C7]	P09884	DPOLA_C1403	2056.12	115.9	93.8	143.3	88.9	85.1	73
[K].LFAGCAVK.[S]	1xTMT6plex [K8]; 1xTMT6plex [N-Term]; 1xDBIA [C5]	P09884	DPOLA_C1458	1562.95	124.1	95.7	150.6	93.4	64.5	71.7
[K].AAPKPPFQSHFCVVSKPK.[D]	3xTMT6plex [K4; K16; K18]; 1xTMT6plex [N-Term]; 1xDBIA [C12]	P09884	DPOLA_C584	3180.89	112.3	100	134.6	111.2	69.2	72.7
[K].NEAIQAAHDAVAQEGQCR.[V]	1xTMT6plex [N-Term]; 1xDBIA [C17]	P09936	UCHL1_C152	2436.23	94.4	95.7	148.2	97.1	93.5	71.1
[R].AILPCQDTPSVK.[L]	1xTMT6plex [K12]; 1xTMT6plex [N-Term]; 1xDBIA [C5]	P09960	LKHA4_C147	2026.18	115.8	102.4	139.1	91.4	79.3	72.1
[K].AAAIGIDLGTTYSCVGVFQHGK.[V]	1xTMT6plex [K22]; 1xTMT6plex [N-Term]; 1xDBIA [C14]	P0DMV9	HS71B_C17	2962.62	100.5	96.6	145.6	94.2	88	75.2
[R].ARFEELCSDLFR.[S]	1xTMT6plex [N-Term]; 1xDBIA [C7]	P0DMV9	HS71B_C306	2011.06	120.6	86.8	139.3	84.5	97	71.7
[K].CQEVISWLDANTLAEK.[D]	1xTMT6plex [K16]; 1xTMT6plex [N-Term]; 1xDBIA [C1]	P0DMV9	HS71B_C574	2574.4	126.4	88.6	150.6	87.5	75.8	71.2
[K].ELEQVCNPIISGLYQGAGGPGPGGFGAQGPK.[G]	1xTMT6plex [K31]; 1xTMT6plex [N-Term]; 1xDBIA [C6]	P0DMV9	HS71B_C603	3752.98	100.9	85.1	111.6	94.6	132.6	75.2
[R].ALAEEWGCPFMETSAK.[S]	1xTMT6plex [K16]; 1xTMT6plex [N-Term]; 1xDBIA [C8]	P10114	RAP2A_C140	2524.3	90.9	74.5	129	90	133.2	82.4
[R].MSGCDLGPDGR.[L]	1xTMT6plex [N-Term]; 1xDBIA [C4]	P10321	HLAC_C125	1632.8	116.9	86.7	145.2	88.9	82.2	80.1
[R].AYLEGTCVEWLR.[R]	1xTMT6plex [N-Term]; 1xDBIA [C7]	P10321	HLAC_C188	1965.05	122.2	94.5	163.7	80.9	75.4	63.3
[K].ASALACLK.[V]	1xTMT6plex [K8]; 1xTMT6plex [N-Term]; 1xDBIA [C6]	P10515	ODP2_C488	1530.94	87	77.5	126.9	93.3	129.7	85.7
[K].AIALFTPDACGLSDPAHVESLQEK.[A]	1xTMT6plex [K24]; 1xTMT6plex [N-Term]; 1xDBIA [C10]	P10588	NR2F6_C316	3266.75	94.5	91.8	127.4	80.4	126.2	79.7
[K].TAFQEALDAAGDKLVVVDFSATWCGPCK.[M]	1xCarbamidomethyl [C27]; 2xTMT6plex [K13; K28]; 1xTMT6plex [N-Term]; 1xDBIA [C24]	P10599	THIO_C32	3983.1	152.5	117.5	176	90.9	15.9	47.2
[K].LVVVDFSATWCGPCK.[M]	1xCarbamidomethyl [C14]; 1xTMT6plex [K15]; 1xTMT6plex [N-Term]; 1xDBIA [C11]	P10599	THIO_C32	2436.32	141.5	117.7	170.8	90.1	36.6	43.2
[K].CMPTFQFFK.[K]	1xTMT6plex [K9]; 1xTMT6plex [N-Term]; 1xDBIA [C1]	P10599	THIO_C73	1903.04	134.7	104.1	163	87.2	50.2	60.8
[R].SLRECELYVQK.[H]	1xTMT6plex [K11]; 1xTMT6plex [N-Term]; 1xDBIA [C5]	P10644	KAP0_C18	2122.21	134.6	92.3	165.4	99.1	47	61.5
[K].CPALYWLSGLTCTEQNFISK.[S]	1xCarbamidomethyl [C1]; 1xTMT6plex [K20]; 1xTMT6plex [N-Term]; 1xDBIA [C12]	P10768	ESTD_C56	3085.63	94.8	105.1	121.1	96.5	102.4	80.1
[K].CEFQDAYVLLSEKK.[I]	2xTMT6plex [K13; K14]; 1xTMT6plex [N-Term]; 1xDBIA [C1]	P10809	CH60_C237	2656.5	86.4	71.8	143	92.5	113.8	92.6
[K].CEFQDAYVLLSEK.[K]	1xTMT6plex [K13]; 1xTMT6plex [N-Term]; 1xDBIA [C1]	P10809	CH60_C237	2299.24	86.5	61.2	126.3	90.8	141.8	93.4
[R].AAVEEGIVLGGGCALLR.[C]	1xTMT6plex [N-Term]; 1xDBIA [C13]	P10809	CH60_C442	2153.23	95.1	78	141.9	97.4	107.4	80.1
[R].CIPALDSLTPANEDQK.[I]	1xTMT6plex [K16]; 1xTMT6plex [N-Term]; 1xDBIA [C1]	P10809	CH60_C447	2469.34	94.2	73.9	132.7	87.2	119.2	92.8
[K].GPAVGIDLGTTYSCVGVFQHGK.[V]	1xTMT6plex [K22]; 1xTMT6plex [N-Term]; 1xDBIA [C14]	P11142	HSP7C_C17	2960.61	96.8	94.9	138.9	93.4	100.5	75.5
[K].VCNPIITK.[L]	1xTMT6plex [K8]; 1xTMT6plex [N-Term]; 1xDBIA [C2]	P11142	HSP7C_C603	1642.01	116	91	152.4	98.6	72.4	69.5
[K].VSLLDDTVYECVVEK.[H]	1xTMT6plex [K15]; 1xTMT6plex [N-Term]; 1xDBIA [C11]	P11171	EPB41_C224	2466.36	107.8	89.2	123.5	89	117.2	73.2
[R].ELLQLADALGPSICMLK.[T]	1xTMT6plex [K17]; 1xTMT6plex [N-Term]; 1xDBIA [C14]	P11172	UMPS_C278	2569.49	109.5	92.7	126.8	101.8	89.4	79.7
[K].IPHFGYCDEIDLTELVK.[L]	1xTMT6plex [K17]; 1xTMT6plex [N-Term]; 1xDBIA [C7]	P11182	ODB2_C279	2746.49	97.7	71.3	128	85	140.4	77.6
[R].TCFETFPDK.[V]	1xTMT6plex [K9]; 1xTMT6plex [N-Term]; 1xDBIA [C2]	P11216	PYGB_C326	1841.99	135.6	97.6	161.6	94.1	45.1	66
[K].EYGFCIMDNHK.[E]	1xTMT6plex [K11]; 1xTMT6plex [N-Term]; 1xDBIA [C5]	P11387	TOP1_C341	2111.08	102.5	85.9	122.5	93.5	113.6	82.1
[R].IMPEDIIINCSK.[D]	1xTMT6plex [K12]; 1xTMT6plex [N-Term]; 1xDBIA [C10]	P11387	TOP1_C386	2130.21	104.3	79	148.9	89.9	101.8	76.1
[R].AGEMELKPFNGEDYTCITFQPDLSK.[F]	2xTMT6plex [K7; K25]; 1xTMT6plex [N-Term]; 1xDBIA [C16]	P11388	TOP2A_C216	3816.98	92.4	74.9	133.5	89.1	138.6	71.5
[K].SFGSTCQLSEK.[F]	1xTMT6plex [K11]; 1xTMT6plex [N-Term]; 1xDBIA [C6]	P11388	TOP2A_C392	1941.05	116.5	88.4	150.3	89.2	89.8	65.8
[K].AAIGCGIVESILNWVK.[F]	1xTMT6plex [K16]; 1xTMT6plex [N-Term]; 1xDBIA [C5]	P11388	TOP2A_C405	2427.42	122.5	99	117	90.1	104.7	66.7
[R].LQFHDVAGDIFHQQCK.[R]	1xTMT6plex [K16]; 1xTMT6plex [N-Term]; 1xDBIA [C15]	P11413	G6PD_C385	2640.41	136.6	95.6	144.4	96.2	62	65.3
[K].GCLELIK.[E]	1xTMT6plex [K7]; 1xTMT6plex [N-Term]; 1xDBIA [C2]	P11586	C1TC_C152	1529.95	109.7	93.2	162.9	88.6	78.6	67
[K].IVGAPMHDLLLWNNATVTTCHSK.[T]	1xTMT6plex [K23]; 1xTMT6plex [N-Term]; 1xDBIA [C20]	P11586	C1TC_C195	3275.78	92.1	93.5	122.3	100.9	105.4	85.9
[K].QGFGNLPICMAK.[T]	1xTMT6plex [K12]; 1xTMT6plex [N-Term]; 1xDBIA [C9]	P11586	C1TC_C863	2033.14	119.1	95.5	136.3	102	74.2	72.8
[R].GLDFLHANCIVHR.[D]	1xTMT6plex [N-Term]; 1xDBIA [C9]	P11802	CDK4_C135	2020.11	105.5	107.2	163.6	82.4	66.4	74.8
[R].KPLFCGNSEADQLGK.[I]	2xTMT6plex [K1; K15]; 1xTMT6plex [N-Term]; 1xDBIA [C5]	P11802	CDK4_C215	2590.46	111.6	110	138.4	92.4	81.4	66.2
[R].RKPLFCGNSEADQLGK.[I]	2xTMT6plex [K2; K16]; 1xTMT6plex [N-Term]; 1xDBIA [C6]	P11802	CDK4_C215	2746.56	116.5	84	147.8	94.3	84.6	72.8
[R].LMDVCATSR.[T]	1xTMT6plex [N-Term]; 1xDBIA [C5]	P11802	CDK4_C78	1520.81	127	106.2	153.3	84.9	55	73.5
[K].LMDLDVEQLGIPEQEYSCVVK.[M]	1xTMT6plex [K21]; 1xTMT6plex [N-Term]; 1xDBIA [C18]	P12004	PCNA_C135	3162.68	113.3	89.1	128.2	93	102.8	73.6
[R].YFAGNLASGGAAGATSLCFVYPLDFAR.[T]	1xTMT6plex [N-Term]; 1xDBIA [C18]	P12236	ADT3_C129	3264.67	107.9	61.9	137.7	80.2	126.5	85.7
[R].KGADIMYTGTVDCWR.[K]	1xTMT6plex [K1]; 1xTMT6plex [N-Term]; 1xDBIA [C13]	P12236	ADT3_C257	2470.3	119.3	83.7	154.8	90.3	78.4	73.6
[K].GADIMYTGTVDCWR.[K]	1xTMT6plex [N-Term]; 1xDBIA [C12]	P12236	ADT3_C257	2113.04	106	83.1	156.8	82.3	104.8	67
[R].VGMGSGSICITQEVLACGRPQATAVYK.[V]	1xCarbamidomethyl [C17]; 1xTMT6plex [K27]; 1xTMT6plex [N-Term]; 1xDBIA [C9]	P12268	IMDH2_C331	3550.89	123.3	92.8	127.3	100	82.2	74.4
[K].SKDYEFMWNPHLGYILTCPSNLGTGLR.[A]	1xTMT6plex [K2]; 1xTMT6plex [N-Term]; 1xDBIA [C18]	P12277	KCRB_C283	3867.01	120.1	109.6	145.3	100	60.6	64.3
[K].SKDYEFMWNPHLGYILTCPSNLGTGLR.[A]	1xOxidation [M7]; 1xTMT6plex [K2]; 1xTMT6plex [N-Term]; 1xDBIA [C18]	P12277	KCRB_C283	3883.01	105.7	109.9	165.4	100	63.2	55.7
[K].DYEFMWNPHLGYILTCPSNLGTGLR.[A]	1xOxidation [M5]; 1xTMT6plex [N-Term]; 1xDBIA [C16]	P12277	KCRB_C283	3438.72	123.4	104.8	140.2	94.9	78.8	57.9
[K].DYEFMWNPHLGYILTCPSNLGTGLR.[A]	1xTMT6plex [N-Term]; 1xDBIA [C16]	P12277	KCRB_C283	3422.72	115.2	112.3	133.6	82.4	92.3	64.2
[R].LGYILTCPSNLGTGLR.[A]	1xTMT6plex [N-Term]; 1xDBIA [C7]	P12532	KCRU_C316	2203.25	162.3	129.3	133.1	87.2	47.9	40.2
[R].DYPLELFMAQCYGNISDLGK.[G]	1xTMT6plex [K20]; 1xTMT6plex [N-Term]; 1xDBIA [C11]	P12694	ODBA_C178	3031.57	92.8	81.6	135	89.8	128	72.9
[R].MVSDINNAWGCLEQVEK.[G]	1xTMT6plex [K17]; 1xTMT6plex [N-Term]; 1xDBIA [C11]	P12814	ACTN1_C370	2690.4	104.5	88.9	128.5	92.7	110.4	75
[K].ICDQWDNLGALTQK.[R]	1xTMT6plex [K14]; 1xTMT6plex [N-Term]; 1xDBIA [C2]	P12814	ACTN1_C480	2359.28	119.9	87.9	144.5	103.5	82.8	61.4
[R].TVEEIEACMAGCDK.[A]	1xCarbamidomethyl [C8]; 1xTMT6plex [K14]; 1xTMT6plex [N-Term]; 1xDBIA [C12]	P12955	PEPD_C482	2310.15	116.3	95.2	131.9	94.8	89.5	72.3
[K].CDISLQFFLPFSLGK.[E]	1xTMT6plex [K15]; 1xTMT6plex [N-Term]; 1xDBIA [C1]	P13010	XRCC5_C157	2469.4	122.6	87	152.6	89.9	74.6	73.3
[K].ETVYCLNDDDETEVLK.[E]	1xTMT6plex [K16]; 1xTMT6plex [N-Term]; 1xDBIA [C5]	P13010	XRCC5_C296	2640.35	95.1	78.3	110.4	89.4	150.6	76.2
[K].AESCQGDLSTLANVVTSLANLGK.[T]	1xTMT6plex [K23]; 1xTMT6plex [N-Term]; 1xDBIA [C4]	P13056	NR2C1_C265	3045.67	115.8	86.7	122	119.6	88.4	67.4
[R].GSSVFCK.[A]	1xTMT6plex [K7]; 1xTMT6plex [N-Term]; 1xDBIA [C6]	P13196	HEM1_C124	1481.86	96.8	90	169.6	105.2	67.8	70.6
[K].DSPCQLEALK.[L]	1xTMT6plex [K10]; 1xTMT6plex [N-Term]; 1xDBIA [C4]	P13489	RINI_C199	1858.05	121.5	94.9	156.7	96.6	59.9	70.4
[R].WAELLPLLQQCQVVR.[L]	1xTMT6plex [N-Term]; 1xDBIA [C11]	P13489	RINI_C30	2321.34	120.3	91.2	145.3	87.3	75.1	80.8
[R].SNELGDVGVHCVLQGLQTPSCK.[I]	1xCarbamidomethyl [C21]; 1xTMT6plex [K22]; 1xTMT6plex [N-Term]; 1xDBIA [C11]	P13489	RINI_C75	3095.64	102.4	86.3	125.8	96	113.4	76.1
[R].TFCQLILDPIFK.[V]	1xTMT6plex [K12]; 1xTMT6plex [N-Term]; 1xDBIA [C3]	P13639	EF2_C290	2192.29	131.1	87.5	136.4	95.2	75.1	74.7
[K].YRCELLYEGPPDDEAAMGIK.[S]	1xTMT6plex [K20]; 1xTMT6plex [N-Term]; 1xDBIA [C3]	P13639	EF2_C369	3024.56	123.3	100	179.4	92.2	40.6	64.5
[R].CELLYEGPPDDEAAMGIK.[S]	1xTMT6plex [K18]; 1xTMT6plex [N-Term]; 1xDBIA [C1]	P13639	EF2_C369	2705.39	130.3	90.1	156.5	94.9	60.6	67.5
[K].STLTDSLVCK.[A]	1xTMT6plex [K10]; 1xTMT6plex [N-Term]; 1xDBIA [C9]	P13639	EF2_C41	1821.06	129.2	98.6	150.6	96	63.3	62.3
[R].YVEPIEDVPCGNIVGLVGVDQFLVK.[T]	1xTMT6plex [K25]; 1xTMT6plex [N-Term]; 1xDBIA [C10]	P13639	EF2_C466	3456.92	115	103.9	109.8	84.9	120.9	65.4
[K].DLEEDHACIPIKK.[S]	2xTMT6plex [K12; K13]; 1xTMT6plex [N-Term]; 1xDBIA [C8]	P13639	EF2_C567	2494.43	106.3	97.4	116.9	96.2	114.3	69
[K].DLEEDHACIPIK.[K]	1xTMT6plex [K12]; 1xTMT6plex [N-Term]; 1xDBIA [C8]	P13639	EF2_C567	2137.17	101.5	90.3	110.3	90.9	130.5	76.5
[R].ETVSEESNVLCLSK.[S]	1xTMT6plex [K14]; 1xTMT6plex [N-Term]; 1xDBIA [C11]	P13639	EF2_C591	2292.25	123.7	96.6	121.7	101.9	92.7	63.4
[K].IWCFGPDGTGPNILTDITK.[G]	1xTMT6plex [K19]; 1xTMT6plex [N-Term]; 1xDBIA [C3]	P13639	EF2_C651	2802.53	130.4	98.1	164.6	95.6	55.3	56
[R].KIWCFGPDGTGPNILTDITK.[G]	2xTMT6plex [K1; K20]; 1xTMT6plex [N-Term]; 1xDBIA [C4]	P13639	EF2_C651	3159.78	125.9	96	162.5	107.3	45.8	62.5
[K].EGALCEENMR.[G]	1xOxidation [M9]; 1xTMT6plex [N-Term]; 1xDBIA [C5]	P13639	EF2_C693	1692.82	109	93.5	146.8	97.1	84.7	68.9
[K].EGALCEENMR.[G]	1xTMT6plex [N-Term]; 1xDBIA [C5]	P13639	EF2_C693	1676.83	121.3	87.3	134.6	96.1	92	68.7
[R].CLYASVLTAQPR.[L]	1xTMT6plex [N-Term]; 1xDBIA [C1]	P13639	EF2_C728	1847.04	119.3	106.3	175.4	82.1	57.6	59.3
[R].LMEPIYLVEIQCPEQVVGGIYGVLNRK.[R]	1xTMT6plex [K27]; 1xTMT6plex [N-Term]; 1xDBIA [C12]	P13639	EF2_C751	3815.14	111.4	94	129.8	90	105.7	69
[R].LMEPIYLVEIQCPEQVVGGIYGVLNR.[K]	1xTMT6plex [N-Term]; 1xDBIA [C12]	P13639	EF2_C751	3457.88	101.8	103.5	102	94.3	120.8	77.5
[R].LMEPIYLVEIQCPEQVVGGIYGVLNRK.[R]	1xOxidation [M2]; 1xTMT6plex [K27]; 1xTMT6plex [N-Term]; 1xDBIA [C12]	P13639	EF2_C751	3831.13	116.8	81.8	109.4	99	108.2	84.8
[R].SNTGGQAFPQCVFDHWQILPGDPFDNSSRPSQVVAETR.[K]	1xTMT6plex [N-Term]; 1xDBIA [C11]	P13639	EF2_C812	4713.31	110.1	98.8	132.7	93.1	84.3	81
[K].ENFDEVVNDADIILVEFYAPWCGHCK.[K]	1xCarbamidomethyl [C25]; 1xTMT6plex [K26]; 1xTMT6plex [N-Term]; 1xDBIA [C22]	P13667	PDIA4_C206	3837.9	99.4	79.4	113.4	110.4	124.8	72.5
[K].KDVLIEFYAPWCGHCK.[Q]	1xCarbamidomethyl [C15]; 2xTMT6plex [K1; K16]; 1xTMT6plex [N-Term]; 1xDBIA [C12]	P13667	PDIA4_C555	2949.61	110.8	84.6	162.9	93.8	76.5	71.4
[K].DTVLLEFYAPWCGHCK.[Q]	1xCarbamidomethyl [C15]; 1xTMT6plex [K16]; 1xTMT6plex [N-Term]; 1xDBIA [C12]	P13667	PDIA4_C91	2693.4	76.4	87.4	129.2	106.6	128	72.4
[K].EGICALGGTSELSSEGTQHSYSEEEK.[Y]	1xTMT6plex [K26]; 1xTMT6plex [N-Term]; 1xDBIA [C4]	P13797	PLST_C104	3482.7	102.6	97.7	140.1	92.6	102.7	64.2
[K].ALENDPDCR.[H]	1xTMT6plex [N-Term]; 1xDBIA [C8]	P13797	PLST_C143	1557.79	123.9	92.6	149.4	92	75.1	67
[K].VDLNSNGFICDYELHELFK.[E]	1xTMT6plex [K19]; 1xTMT6plex [N-Term]; 1xDBIA [C10]	P13797	PLST_C33	3010.57	119.9	107.8	143.8	97.9	64.8	66
[K].LENCNYAVELGKHPAK.[F]	2xTMT6plex [K12; K16]; 1xTMT6plex [N-Term]; 1xDBIA [C4]	P13797	PLST_C463	2769.57	118.2	96.5	158.8	100.9	52.4	73.2
[K].IENCNYAVELGK.[NH]	1xTMT6plex [K12]; 1xTMT6plex [N-Term]; 1xDBIA [C4]	P13797	PLST_C463	2107.16	120.4	98.6	150.8	99.9	65.7	64.5
[R].RASCTSSTSGSK.[R]	1xTMT6plex [K12]; 1xTMT6plex [N-Term]; 1xDBIA [C4]	P13807	GYS1_C699	1926.05	124.1	110.5	151.1	110.6	44.9	58.7
[R].ASCTSSTSGSK.[R]	1xTMT6plex [K11]; 1xTMT6plex [N-Term]; 1xDBIA [C3]	P13807	GYS1_C699	1769.95	120.8	106.6	160	95.8	56.4	60.5
[R].VSVCAETYNPDEEEEDTDPR.[V]	1xTMT6plex [N-Term]; 1xDBIA [C4]	P13861	KAP2_C101	2823.28	104.1	88.8	128.6	95.4	117.5	65.6
[R].RVSVCAETYNPDEEEEDTDPR.[V]	1xTMT6plex [N-Term]; 1xDBIA [C5]	P13861	KAP2_C101	2979.38	96.1	96.7	116.3	96.8	112.7	81.3
[R].ICNAVSPDKDVDGFHVINVGR.[M]	1xTMT6plex [K9]; 1xTMT6plex [N-Term]; 1xDBIA [C2]	P13995	MTDC_C145	3009.63	101.8	86.1	114.9	91.3	119.4	86.5
[R].MCLDQYSMLPATPWGVWEIIK.[R]	1xTMT6plex [K21]; 1xTMT6plex [N-Term]; 1xDBIA [C2]	P13995	MTDC_C166	3235.71	106	80.7	122.8	87.7	113.2	89.6
[R].MCLDQYSMLPATPWGVWEIIK.[R]	1xOxidation [M]; 1xTMT6plex [K21]; 1xTMT6plex [N-Term]; 1xDBIA [C2]	P13995	MTDC_C166	3251.71	110	78.4	118.7	85.2	120.8	87
[K].WTIGVCEDSVCR.[K]	1xCarbamidomethyl [C6]; 1xTMT6plex [N-Term]; 1xDBIA [C11]	P14373	TRI27_C393	1949.98	120.6	89.2	133.7	93.7	90.4	72.4
[K].CDENILWLDYK.[N]	1xTMT6plex [K11]; 1xTMT6plex [N-Term]; 1xDBIA [C1]	P14618	KPYM_C152	2166.17	133.2	91.7	156.9	87.4	65.3	65.5
[R].AGKPVICATQMLESMIK.[K]	2xTMT6plex [K3; K17]; 1xTMT6plex [N-Term]; 1xDBIA [C7]	P14618	KPYM_C326	2803.62	109.4	96.9	99.9	91.4	120.4	82.1
[R].AGKPVICATQMLESMIK.[K]	1xOxidation [M]; 2xTMT6plex [K3; K17]; 1xTMT6plex [N-Term]; 1xDBIA [C7]	P14618	KPYM_C326	2819.62	91.6	87.9	118.8	98.7	123.2	79.9
[R].AEGSDVANAVLDGADCIMLSGETAK.[G]	1xTMT6plex [K25]; 1xTMT6plex [N-Term]; 1xDBIA [C16]	P14618	KPYM_C358	3191.63	86.2	71.5	83.5	77.2	208	73.6
[R].GIFPVLCKDPVQEAWAEDVDLR.[V]	1xTMT6plex [K8]; 1xTMT6plex [N-Term]; 1xDBIA [C7]	P14618	KPYM_C474	3254.76	89.2	88.3	85.4	88.4	171.7	77
[K].KGYEVIYLTEPVDEYCIQALPEFDGK.[R]	2xTMT6plex [K1; K26]; 1xTMT6plex [N-Term]; 1xDBIA [C16]	P14625	ENPL_C576	4003.14	84.4	67.4	95.3	76.5	203.8	72.6
[K].GYEVIYLTEPVDEYCIQALPEFDGK.[R]	1xTMT6plex [K25]; 1xTMT6plex [N-Term]; 1xDBIA [C15]	P14625	ENPL_C576	3645.88	64	64.1	88.1	71.4	234.5	77.8
[R].LTESPCALVASQYGWSGNMER.[I]	1xOxidation [M19]; 1xTMT6plex [N-Term]; 1xDBIA [C6]	P14625	ENPL_C645	2840.39	89.4	79.2	124.2	90.2	135.5	81.4
[R].LTESPCALVASQYGWSGNMER.[I]	1xTMT6plex [N-Term]; 1xDBIA [C6]	P14625	ENPL_C645	2824.4	100.6	75.7	107.6	87.4	143.8	84.9
[K].ASLNGADIYSGCCTLK.[I]	1xCarbamidomethyl [C13]; 1xTMT6plex [K16]; 1xTMT6plex [N-Term]; 1xDBIA [C12]	P14866	HNRPL_C260	2427.28	99.4	81.6	142.4	94	107.5	75.2
[K].QPAIMPGQSYGLEDGSCSYK.[D]	1xTMT6plex [K20]; 1xTMT6plex [N-Term]; 1xDBIA [C17]	P14866	HNRPL_C472	2885.46	104	74.2	145.6	97.3	102	76.9
[K].QPAIMPGQSYGLEDGSCSYK.[D]	1xOxidation [M5]; 1xTMT6plex [K20]; 1xTMT6plex [N-Term]; 1xDBIA [C17]	P14866	HNRPL_C472	2901.45	98.8	69.4	152.5	91.7	109.5	78
[K].LCFSTAQHAS.[-]	1xTMT6plex [N-Term]; 1xDBIA [C2]	P14866	HNRPL_C581	1589.83	91.5	79.8	167.6	77.4	94.2	89.6
[R].LQSGICHLFR.[E]	1xTMT6plex [N-Term]; 1xDBIA [C6]	P14868	SYDC_C203	1698.97	99.8	83.7	137.5	92.4	100.1	86.5
[R].LEYCEALAMLR.[E]	1xTMT6plex [N-Term]; 1xDBIA [C4]	P14868	SYDC_C349	1836.99	120.4	81.2	147.6	91.5	90.8	68.5
[K].GIMEEDEACGR.[Q]	1xTMT6plex [N-Term]; 1xDBIA [C9]	P14923	PLAK_C49	1734.84	122	95.1	167.8	88.3	68	58.9
[R].AGFQTEDFSLYACASPK.[T]	1xTMT6plex [K17]; 1xTMT6plex [N-Term]; 1xDBIA [C13]	P15056	BRAF_C748	2589.34	115.6	91.8	137.1	100.1	77.2	78.2
[K].CVEELPEWNFDGSSTLQSEGSNSDMYLVPAAMFR.[D]	1xTMT6plex [N-Term]; 1xDBIA [C1]	P15104	GLNA_C53	4335.02	126.3	103.6	145	96.3	60.2	68.5
[R].VCALLSCTSHK.[D]	1xCarbamidomethyl [C7]; 1xTMT6plex [K11]; 1xTMT6plex [N-Term]; 1xDBIA [C2]	P15121	ALDR_C299	1973.11	120.3	112.8	159.9	89.9	59.6	57.6
[K].EIGLWFHPEELVDYTSCAQNWIYE.[-]	1xTMT6plex [N-Term]; 1xDBIA [C17]	P15531	NDKA_C145	3467.68	122	102.2	144.3	83.7	89.1	58.8
[K].LLMMAGIDDCYTSAR.[G]	1xTMT6plex [N-Term]; 1xDBIA [C10]	P15880	RS2_C222	2185.1	121.5	100.5	150.8	87.1	69.4	70.7
[R].GCTATLGNFAK.[A]	1xTMT6plex [K11]; 1xTMT6plex [N-Term]; 1xDBIA [C2]	P15880	RS2_C229	1837.04	117.7	108.1	155.9	85.6	82	50.7
[K].YQAECSQFK.[A]	1xTMT6plex [K9]; 1xTMT6plex [N-Term]; 1xDBIA [C5]	P15924	DESP_C1069	1857.99	126.2	89.1	157.4	93.4	68	65.9
[R].QMGQPCDAYQK.[R]	1xTMT6plex [K11]; 1xTMT6plex [N-Term]; 1xDBIA [C6]	P15924	DESP_C135	2023.05	101.5	92.4	114.1	94.9	103	94.1
[K].RTASEDSCK.[R]	1xTMT6plex [K9]; 1xTMT6plex [N-Term]; 1xDBIA [C8]	P15924	DESP_C1589	1750.95	122.5	90.7	134.7	97	90.9	64.2
[K].GGGGYTCQSGSGWDEFTK.[H]	1xTMT6plex [K18]; 1xTMT6plex [N-Term]; 1xDBIA [C7]	P15924	DESP_C174	2591.26	106.6	85.2	175.5	94.6	73.7	64.4
[R].ETQTECEWTVDTSK.[L]	1xTMT6plex [K14]; 1xTMT6plex [N-Term]; 1xDBIA [C6]	P15924	DESP_C1957	2411.22	119.2	83.9	147.7	93.8	89.7	65.6
[K].GDECILKDNNER.[S]	1xTMT6plex [K7]; 1xTMT6plex [N-Term]; 1xDBIA [C4]	P15924	DESP_C482	2160.15	90.3	92.2	112.7	89.5	109.5	105.9
[R].GVITDQNSDGYCQTGTMSR.[H]	1xTMT6plex [N-Term]; 1xDBIA [C12]	P15924	DESP_C57	2558.22	113.8	97.1	159.4	86.6	79.4	63.7
[R].GVITDQNSDGYCQTGTMSR.[H]	1xOxidation [M17]; 1xTMT6plex [N-Term]; 1xDBIA [C12]	P15924	DESP_C57	2574.21	110.5	86.9	160.6	96.1	78.1	67.8
[K].YCYLQNEVFGLFQK.[L]	1xTMT6plex [K14]; 1xTMT6plex [N-Term]; 1xDBIA [C2]	P15924	DESP_C740	2506.36	122.7	92.2	174.2	92.9	55.7	62.2
[K].LENINGVTDGYLNSLCTVR.[A]	1xTMT6plex [N-Term]; 1xDBIA [C16]	P15924	DESP_C768	2606.38	114	79.9	138.2	91.1	100.7	76.1
[R].LTEEETVCLDLDK.[V]	1xTMT6plex [K13]; 1xTMT6plex [N-Term]; 1xDBIA [C8]	P15924	DESP_C798	2262.23	85.8	73	84.8	75.7	208.2	72.5
[R].DVCTELLPLIKPQGR.[V]	1xTMT6plex [K11]; 1xTMT6plex [N-Term]; 1xDBIA [C3]	P16152	CBR1_C122	2436.44	124.3	103	123.1	98.1	82.9	68.7
[R].ICSFEEAK.[G]	1xTMT6plex [K8]; 1xTMT6plex [N-Term]; 1xDBIA [C2]	P16298	PP2BB_C477	1680.94	114.4	98.8	153.9	96.4	58.5	78
[K].STIQNLESSSNQALNCK.[F]	1xTMT6plex [K17]; 1xTMT6plex [N-Term]; 1xDBIA [C16]	P16383	GCFC2_C320	2591.39	129.1	104.3	148.9	91.2	62.2	64.4
[K].EVGETLLYYGCR.[R]	1xTMT6plex [N-Term]; 1xDBIA [C11]	P16435	NCPR_C566	1928.01	104.8	88.4	120.3	100.6	96.5	89.5
[R].HCDDDGRTENGALAPK.[Q]	1xTMT6plex [K16]; 1xTMT6plex [N-Term]; 1xDBIA [C2]	P17028	ZNF24_C189	2453.26	112.7	87.7	137.8	102	82.5	77.2
[K].YGETCFPK.[G]	1xTMT6plex [K8]; 1xTMT6plex [N-Term]; 1xDBIA [C5]	P17028	ZNF24_C233	1698.93	119.2	84	163	99.6	67.8	66.4
[R].MVLCSQQWK.[L]	1xTMT6plex [K9]; 1xTMT6plex [N-Term]; 1xDBIA [C4]	P17480	UBF1_C328	1877.05	112.9	80.8	136	103.2	85.8	81.3
[K].ICEGSEDKERPDQTNPSANWLHAR.[S]	1xTMT6plex [K8]; 1xTMT6plex [N-Term]; 1xDBIA [C2]	P17482	HXB9_C161	3507.78	87.9	90	145.8	91	105.6	79.7
[R].AAPCDYGPAPAFYR.[E]	1xTMT6plex [N-Term]; 1xDBIA [C4]	P17509	HXB6_C72	2024.03	98.1	90.2	153.7	111.3	67	79.7
[K].ESACALSGADEQPPFHPEPR.[K]	1xTMT6plex [N-Term]; 1xDBIA [C4]	P17509	HXB6_C88	2663.31	114.3	88.6	147.1	82.9	96.4	70.7
[R].WNDNCPSWNTIDPEER.[E]	1xTMT6plex [N-Term]; 1xDBIA [C5]	P17655	CAN2_C301	2501.17	132.5	96.4	161.2	92.1	56.7	61
[K].MPCQLHQVIVAR.[F]	1xTMT6plex [N-Term]; 1xDBIA [C3]	P17655	CAN2_C640	1920.09	79.1	50.8	87.8	77	165	140.2
[K].RPTEICADPQFIIGGATR.[T]	1xTMT6plex [N-Term]; 1xDBIA [C6]	P17655	CAN2_C82	2470.34	105.4	111.8	113.9	97.8	96.7	74.5
[K].APPTACYAGAAPAPSQVK.[S]	1xTMT6plex [K18]; 1xTMT6plex [N-Term]; 1xDBIA [C6]	P17676	CEBPB_C248	2454.36	90.9	84.9	142.1	96.4	107.3	78.3
[K].LCSAHGVLVPGGFGVR.[G]	1xTMT6plex [N-Term]; 1xDBIA [C2]	P17812	PYRG1_C362	2094.18	107.2	99.6	156.7	96	71.9	68.6
[K].KCLEEQGLK.[F]	2xTMT6plex [K1; K9]; 1xTMT6plex [N-Term]; 1xDBIA [C2]	P17812	PYRG1_C491	2031.22	116.1	95.5	145.9	106.9	57.9	77.6
[R].ELAQQVQQVAAEYCR.[A]	1xTMT6plex [N-Term]; 1xDBIA [C14]	P17844	DDX5_C191	2261.19	102.3	81.8	137.9	107.7	93.5	76.8
[R].LIDFLECGK.[T]	1xTMT6plex [K9]; 1xTMT6plex [N-Term]; 1xDBIA [C7]	P17844	DDX5_C234	1792.04	99.7	77.1	137.5	92.2	113.1	80.3
[R].GHNCPKPVLNFYEANFPANVMDVIAR.[Q]	1xTMT6plex [K6]; 1xTMT6plex [N-Term]; 1xDBIA [C4]	P17844	DDX5_C89	3670.94	96.2	74.6	110.1	98.9	126.8	93.4
[R].LPLMECVQMTK.[E]	1xTMT6plex [K11]; 1xTMT6plex [N-Term]; 1xDBIA [C6]	P17858	PFKAL_C351	2047.15	98.5	88.4	114.3	95.2	116.1	87.5
[R].ACAAQTK.[A]	1xTMT6plex [K7]; 1xTMT6plex [N-Term]; 1xDBIA [C2]	P17980	PRS6A_C240	1446.85	109.7	86.4	134.6	105.9	85.5	78
[R].YINENLIVNTDELGRDCLINAAK.[T]	1xTMT6plex [K23]; 1xTMT6plex [N-Term]; 1xDBIA [C17]	P17987	TCPA_C147	3345.82	111.5	91.9	117.8	98	107.7	73.1
[R].SQMESMLISGYALNCVVGSQGMPK.[R]	1xTMT6plex [K24]; 1xTMT6plex [N-Term]; 1xDBIA [C15]	P17987	TCPA_C218	3284.69	101.2	89.8	117.9	105.9	101.2	84
[K].IACLDFSLQK.[T]	1xTMT6plex [K10]; 1xTMT6plex [N-Term]; 1xDBIA [C3]	P17987	TCPA_C236	1892.11	116	93.7	150.7	87.1	81.4	71.2
[R].ICDDELILIK.[N]	1xTMT6plex [K10]; 1xTMT6plex [N-Term]; 1xDBIA [C2]	P17987	TCPA_C357	1929.15	118.4	94	143.6	96.7	82.7	64.7
[R].GANDFMCDEMER.[S]	1xTMT6plex [N-Term]; 1xDBIA [C7]	P17987	TCPA_C385	1942.87	104.7	94.3	116.4	90.3	126.5	67.8
[R].SLHDALCVVKR.[V]	1xTMT6plex [K10]; 1xTMT6plex [N-Term]; 1xDBIA [C7]	P17987	TCPA_C397	1995.19	101.3	94.9	150.6	101	74.9	77.4
[K].VLCELADLQDK.[E]	1xTMT6plex [K11]; 1xTMT6plex [N-Term]; 1xDBIA [C3]	P17987	TCPA_C76	2001.15	109	89.3	138.8	104.3	87.9	70.6
[K].EETQEDKDCPIKEEK.[G]	3xTMT6plex [K7; K12; K15]; 1xTMT6plex [N-Term]; 1xDBIA [C9]	P18031	PTN1_C344	3033.66	69.8	56.7	64.6	76.8	272	60
[R].HAAQCVGR.[A]	1xTMT6plex [N-Term]; 1xDBIA [C5]	P18074	ERCC2_C663	1366.76	114.8	84.4	135.3	104.2	84.5	76.8
[K].YGIICMEDLIHEIYTVGK.[R]	1xTMT6plex [K18]; 1xTMT6plex [N-Term]; 1xDBIA [C5]	P18124	RL7_C186	2851.55	97.9	97.5	128.8	96.2	104.3	75.2
[K].ANAAAMCAK.[A]	1xTMT6plex [K9]; 1xTMT6plex [N-Term]; 1xDBIA [C7]	P18583	SON_C2070	1604.9	114.4	57.5	147.5	98	93.6	89.1
[K].ANAAAMCAK.[A]	1xOxidation [M6]; 1xTMT6plex [K9]; 1xTMT6plex [N-Term]; 1xDBIA [C7]	P18583	SON_C2070	1620.9	97.7	76.9	142.3	94.1	108.7	80.3
[R].CVSVQTDPTDEIPTKK.[S]	2xTMT6plex [K15; K16]; 1xTMT6plex [N-Term]; 1xDBIA [C1]	P18583	SON_C92	2744.55	105.1	70.1	153.4	103.2	86.1	82
[R].INPYMSSPCHIEMILTEK.[E]	1xTMT6plex [K18]; 1xTMT6plex [N-Term]; 1xDBIA [C9]	P18621	RL17_C144	2860.52	111.5	98.9	159.6	84.1	75.8	70.1
[R].INPYMSSPCHIEMILTEK.[E]	1xOxidation [M]; 1xTMT6plex [K18]; 1xTMT6plex [N-Term]; 1xDBIA [C9]	P18621	RL17_C144	2876.51	95.3	96.9	163.4	102.5	70	72
[K].QCVPFR.[R]	1xTMT6plex [N-Term]; 1xDBIA [C2]	P18621	RL17_C57	1274.72	138.7	87.6	166.9	100.6	41.7	64.6
[K].QCVPFRR.[Y]	1xTMT6plex [N-Term]; 1xDBIA [C2]	P18621	RL17_C57	1430.83	120.8	94.7	157.4	97.1	54.7	75.3
[R].YADLTEDQLPSCESLK.[D]	1xTMT6plex [K16]; 1xTMT6plex [N-Term]; 1xDBIA [C12]	P18669	PGAM1_C153	2566.35	103.5	77.2	127.7	90.2	121.9	79.5
[R].GIVCPFVEIEVAGAEYDSTK.[Q]	1xTMT6plex [K20]; 1xTMT6plex [N-Term]; 1xDBIA [C4]	P19174	PLCG1_C1109	2881.54	100.5	95.7	118.9	112.1	99.9	72.9
[K].EALNSCNK.[R]	1xTMT6plex [K8]; 1xTMT6plex [N-Term]; 1xDBIA [C6]	P19338	NUCL_C543	1632.91	106.1	86	134.8	93.2	101.7	78.2
[K].KLPVGFTFSFPCQQSK.[I]	2xTMT6plex [K1; K16]; 1xTMT6plex [N-Term]; 1xDBIA [C12]	P19367	HXK1_C158	2797.6	98.4	85.4	125.4	92	111.5	87.4
[R].SGVIVLPCGAGK.[S]	1xTMT6plex [K12]; 1xTMT6plex [N-Term]; 1xDBIA [C8]	P19447	ERCC3_C342	1855.12	110.7	86.1	133.9	92.1	104.2	73.1
[R].GLGGGDLSVSSDSDSSQAGANLGAQPMLWPAWVYCTR.[Y]	1xTMT6plex [N-Term]; 1xDBIA [C35]	P19622	HME2_C219	4279.07	119.6	105.9	177.2	88.7	57.2	51.5
[K].EDGVLCCQGECQWLHLDLIK.[E]	2xCarbamidomethyl [C6; C7]; 1xTMT6plex [K20]; 1xTMT6plex [N-Term]; 1xDBIA [C11]	P19623	SPEE_C209	3170.62	102.7	79.2	98.3	92.3	144.5	83
[R].ETCSLWPGQALSLQVEQLLHHR.[R]	1xTMT6plex [N-Term]; 1xDBIA [C3]	P19623	SPEE_C25	3070.65	99.1	101	125.2	85.7	106	83.1
[K].EQSQPCADNAVLSSGLTAAR.[-]	1xTMT6plex [N-Term]; 1xDBIA [C6]	P19784	CSK22_C336	2543.31	109.1	84.4	118	99	117.4	72.1
[R].YVCEGPSHGGLPGASSEK.[N]	1xTMT6plex [K18]; 1xTMT6plex [N-Term]; 1xDBIA [C3]	P19838	NFKB1_C61	2529.32	118.8	109.2	175.2	104.5	43.1	49.2
[R].LGTDESCFNMILATR.[S]	1xTMT6plex [N-Term]; 1xDBIA [C7]	P20073	ANXA7_C363	2196.14	99	97	130.1	85.8	109.4	78.6
[K].CTDFDDISLLHAK.[N]	1xTMT6plex [K13]; 1xTMT6plex [N-Term]; 1xDBIA [C1]	P20585	MSH3_C166	2232.21	111	92.3	153.5	105.8	62.9	74.5
[K].GKLPIVNDCDELVAIIAR.[T]	1xTMT6plex [K2]; 1xTMT6plex [N-Term]; 1xDBIA [C9]	P20839	IMDH1_C215	2693.58	101.8	78.4	106.9	95.7	131.8	85.5
[R].GPVVLAEDFLDIMGQPINPQCR.[I]	1xTMT6plex [N-Term]; 1xDBIA [C21]	P21281	VATB2_C162	2937.55	96.9	78.1	110.6	91.5	131.8	91.1
[K].AHVVPCFDASK.[V]	1xTMT6plex [K11]; 1xTMT6plex [N-Term]; 1xDBIA [C6]	P21333	FLNA_C1157	1928.08	115.9	94.3	144.2	100.2	78.7	66.7
[K].VEYTPYEEGLHSVDVTYDGSPVPSSPFQVPVTEGCDPSR.[V]	1xTMT6plex [N-Term]; 1xDBIA [C35]	P21333	FLNA_C1353	4765.28	85.2	68.2	138.6	93.6	141.5	72.9
[K].AEISCTDNQDGTCSVSYLPVLPGDYSILVK.[Y]	1xCarbamidomethyl [C13]; 1xTMT6plex [K30]; 1xTMT6plex [N-Term]; 1xDBIA [C5]	P21333	FLNA_C1912	3999.05	98.8	92.3	124.9	99.7	119	65.2
[R].EEPCLLK.[R]	1xTMT6plex [K7]; 1xTMT6plex [N-Term]; 1xDBIA [C4]	P21333	FLNA_C1997	1585.94	105.6	100.3	113.3	102.3	116.2	62.3
[R].ALGALVDSCAPGLCPDWDSWDASKPVTNAR.[E]	1xCarbamidomethyl [C9]; 1xTMT6plex [K24]; 1xTMT6plex [N-Term]; 1xDBIA [C14]	P21333	FLNA_C210	3926.99	110.6	91	118.6	91.5	112.8	75.6
[R].VTYCPTEPGNYIINIK.[F]	1xTMT6plex [K16]; 1xTMT6plex [N-Term]; 1xDBIA [C4]	P21333	FLNA_C2107	2579.43	111.9	101.7	131.6	94.7	85.9	74.2
[K].DGSCGVAYVVQEPGDYEVSVK.[F]	1xTMT6plex [K21]; 1xTMT6plex [N-Term]; 1xDBIA [C4]	P21333	FLNA_C2293	2955.52	119.8	93	152.4	95.3	67.4	72.2
[K].ATCAPQHGAPGPGPADASK.[V]	1xTMT6plex [K19]; 1xTMT6plex [N-Term]; 1xDBIA [C3]	P21333	FLNA_C2543	2487.32	113.8	102.7	129.4	100.3	84.8	69
[K].SSFTVDCSK.[A]	1xTMT6plex [K9]; 1xTMT6plex [N-Term]; 1xDBIA [C7]	P21333	FLNA_C2582	1727.94	109	88.4	164.1	91.4	71	76.1
[R].SPYTVTVGQACNPSACR.[A]	1xCarbamidomethyl [C16]; 1xTMT6plex [N-Term]; 1xDBIA [C11]	P21333	FLNA_C478	2336.17	102.7	92.6	136.9	95.6	92.3	79.9
[K].VGTECGNQK.[V]	1xTMT6plex [K9]; 1xTMT6plex [N-Term]; 1xDBIA [C5]	P21333	FLNA_C574	1689.94	120.4	90.5	140.4	99	73.7	76.1
[K].IECDDKGDGSCDVR.[Y]	1xCarbamidomethyl [C11]; 1xTMT6plex [K6]; 1xTMT6plex [N-Term]; 1xDBIA [C3]	P21333	FLNA_C623	2323.14	110.1	87.1	132.9	91.8	99.1	79
[R].YWPQEAGEYAVHVLCNSEDIR.[L]	1xTMT6plex [N-Term]; 1xDBIA [C15]	P21333	FLNA_C649	3004.48	85.6	95.9	92.1	98.5	126.8	101
[R].VQVQDNEGCPVEALVK.[D]	1xTMT6plex [K16]; 1xTMT6plex [N-Term]; 1xDBIA [C9]	P21333	FLNA_C717	2482.37	101.6	81.6	105.5	85.5	144.6	81.1
[R].GSQPADVDLMIDCLVSCFR.[I]	1xCarbamidomethyl [C13]; 1xTMT6plex [N-Term]; 1xDBIA [C17]	P21359	NF1_C383	2651.32	113.7	88.9	139.5	107.1	85.1	65.7
[R].ELVDIFVVGQQCPLFEVPGPNSK.[R]	1xTMT6plex [K23]; 1xTMT6plex [N-Term]; 1xDBIA [C12]	P21675	TAF1_C786	3269.8	110.6	80	130.4	86.4	118.1	74.5
[K].IVDAVIQEHQPSVLLELGAYCGYSAVR.[M]	1xTMT6plex [N-Term]; 1xDBIA [C21]	P21964	COMT_C119	3455.86	99.8	91.4	143.7	81.8	102.2	81.1
[R].LITIEINPDCAAITQR.[M]	1xTMT6plex [N-Term]; 1xDBIA [C10]	P21964	COMT_C145	2296.29	84	77.6	104.5	82.7	179.2	72.1
[K].GTVLLADNVICPGAPDFLAHVR.[G]	1xTMT6plex [N-Term]; 1xDBIA [C11]	P21964	COMT_C223	2803.55	88.6	84.5	111.3	87.8	157.5	70.3
[R].GSSCFECTHYQSFLEYR.[E]	1xCarbamidomethyl [C7]; 1xTMT6plex [N-Term]; 1xDBIA [C4]	P21964	COMT_C238	2639.22	90.7	94.3	143.3	93.1	96.2	82.3
[R].HEGVFICR.[G]	1xTMT6plex [N-Term]; 1xDBIA [C7]	P22087	FBRL_C99	1485.82	108.9	77	152.8	89.2	90.8	81.3
[K].AFTKPEEACSFILSADFPALVVK.[A]	2xTMT6plex [K4; K23]; 1xTMT6plex [N-Term]; 1xDBIA [C9]	P22102	PUR2_C134	3466.96	120.2	100.9	139.4	86	88.3	65.2
[R].LLEGDGGPNTGGMGAYCPAPQVSNDLLLK.[I]	1xTMT6plex [K29]; 1xTMT6plex [N-Term]; 1xDBIA [C17]	P22102	PUR2_C237	3641.91	102.4	87.1	114.7	97.2	116.8	81.9
[K].QVLVAPGNAGTACSEK.[I]	1xTMT6plex [K16]; 1xTMT6plex [N-Term]; 1xDBIA [C13]	P22102	PUR2_C41	2299.28	119.1	103.6	124	89.9	93.2	70.3
[K].SSLQYSSPAPDGCGDQTLGDLLLTPTR.[I]	1xTMT6plex [N-Term]; 1xDBIA [C13]	P22102	PUR2_C646	3317.69	117.3	91	112.5	95.1	99.7	84.3
[R].SAGVQCFGPTAEAAQLESSK.[R]	1xTMT6plex [K20]; 1xTMT6plex [N-Term]; 1xDBIA [C6]	P22102	PUR2_C93	2735.44	112.3	89.8	162.6	100.7	71.9	62.7
[K].ACGNFGIPCELR.[V]	1xCarbamidomethyl [C2]; 1xTMT6plex [N-Term]; 1xDBIA [C9]	P22234	PUR6_C295	1861.96	131.5	87.1	164.1	101.8	51	64.4
[K].ITSCIFQLLQEAGIK.[T]	1xTMT6plex [K15]; 1xTMT6plex [N-Term]; 1xDBIA [C4]	P22234	PUR6_C63	2418.42	117.4	91.3	155.9	99.7	70.3	65.5
[K].ADCTITMADSDFLALMTGK.[M]	1xTMT6plex [K19]; 1xTMT6plex [N-Term]; 1xDBIA [C3]	P22307	SCP2_C495	2758.42	101.3	79.6	113.2	82	136.5	87.4
[K].ALADAQIPYSAVDQACVGYVFGDSTCGQR.[A]	1xCarbamidomethyl [C16]; 1xTMT6plex [N-Term]; 1xDBIA [C26]	P22307	SCP2_C71	3587.75	65.3	76	145.4	108.5	112.8	92.1
[R].AIYHSLGMTGIPIINVNNNCATGSTALFMAR.[Q]	1xTMT6plex [N-Term]; 1xDBIA [C20]	P22307	SCP2_C94	3775.96	183.3	181.8	76	60.8	56.4	41.8
[K].DNPGVVTCLDEAR.[H]	1xTMT6plex [N-Term]; 1xDBIA [C8]	P22314	UBA1_C234	1914	117.3	91.5	113.9	89.3	115.3	72.7
[K].VLGPYTFSICDTSNFSDYIR.[G]	1xTMT6plex [N-Term]; 1xDBIA [C10]	P22314	UBA1_C278	2823.42	125.2	89	139.4	94	81.5	70.8
[K].SIPICTLK.[N]	1xTMT6plex [K8]; 1xTMT6plex [N-Term]; 1xDBIA [C5]	P22314	UBA1_C632	1629.02	121.4	87.2	141.3	90.2	91.6	68.3
[R].VCVPSSASALGTASK.[A]	1xTMT6plex [K15]; 1xTMT6plex [N-Term]; 1xDBIA [C2]	P22681	CBL_C508	2132.21	131.2	107	167.1	95.2	39.5	60.1
[R].NALANPLYCPDYR.[I]	1xTMT6plex [N-Term]; 1xDBIA [C9]	P22695	QCR2_C192	2035.06	105.4	100.9	154.9	84.9	94	60
[R].ILQDDIESLMPIVYTPTVGLACSQYGHIFR.[R]	1xTMT6plex [N-Term]; 1xDBIA [C22]	P23368	MAOM_C120	3905.05	83.8	79.3	122.6	75.1	154.7	84.5
[K].YCTFNDDIQGTAAVALAGLLAAQK.[V]	1xTMT6plex [K24]; 1xTMT6plex [N-Term]; 1xDBIA [C2]	P23368	MAOM_C274	3208.74	100.2	76.7	123.9	121.1	99.2	78.9
[K].RNEDACPVGTVSAAPWGSSSILPISWAYIK.[M]	1xTMT6plex [K30]; 1xTMT6plex [N-Term]; 1xDBIA [C6]	P23378	GCSP_C795	3930.1	103.2	87.7	140.6	89.9	97	81.5
[K].GIFGFTDSDCIGK.[I]	1xTMT6plex [K13]; 1xTMT6plex [N-Term]; 1xDBIA [C10]	P23381	SYWC_C274	2114.14	109.2	93.3	138.8	87.5	98.6	72.6
[K].GCEVVVSGK.[L]	1xTMT6plex [K9]; 1xTMT6plex [N-Term]; 1xDBIA [C2]	P23396	RS3_C134	1631.96	102.5	98.4	145.6	81.3	109.2	63.1
[R].GLCAIAQAESLR.[Y]	1xTMT6plex [N-Term]; 1xDBIA [C3]	P23396	RS3_C97	1756.99	113	102.6	139.1	87.4	94.7	63.2
[K].SCYEDGWLIK.[M]	1xTMT6plex [K10]; 1xTMT6plex [N-Term]; 1xDBIA [C2]	P23434	GCSH_C138	1968.07	113.1	76.3	138.5	79.9	108.2	84.1
[K].AQCEQSHLMR.[E]	1xTMT6plex [N-Term]; 1xDBIA [C3]	P23508	CRCM_C58	1727.89	111.3	94.1	140	100	79.9	74.7
[K].QAQYLGMSCDGPFKPDHYR.[Y]	1xTMT6plex [K14]; 1xTMT6plex [N-Term]; 1xDBIA [C9]	P23526	SAHH_C421	2967.5	115.2	86.9	145.1	97.2	80.5	75.1
[K].HELQANCYEEVKDR.[C]	1xTMT6plex [K12]; 1xTMT6plex [N-Term]; 1xDBIA [C7]	P23528	COF1_C139	2488.3	116.3	99.9	144	99.7	72.6	67.5
[K].HELQANCYEEVK.[D]	1xTMT6plex [K12]; 1xTMT6plex [N-Term]; 1xDBIA [C7]	P23528	COF1_C139	2217.17	111.9	99.3	136.9	92.1	89.9	69.9
[R].CTLAEK.[L]	1xTMT6plex [K6]; 1xTMT6plex [N-Term]; 1xDBIA [C1]	P23528	COF1_C147	1418.84	135.3	94.4	165.8	91.7	53.6	59.1
[K].AVLFCLSEDKK.[N]	2xTMT6plex [K10; K11]; 1xTMT6plex [N-Term]; 1xDBIA [C5]	P23528	COF1_C39	2236.33	112.8	84.2	133.2	105.1	90.2	74.5
[K].AVLFCLSEDK.[K]	1xTMT6plex [K10]; 1xTMT6plex [N-Term]; 1xDBIA [C5]	P23528	COF1_C39	1879.08	105.7	89.9	134.1	98.3	96.9	75.1
[K].ENFSLDWCK.[Q]	1xTMT6plex [K9]; 1xTMT6plex [N-Term]; 1xDBIA [C8]	P23919	KTHY_C117	1896.01	118.7	74.3	123.3	92.9	110.2	80.7
[R].CFHQLMK.[D]	1xTMT6plex [K7]; 1xTMT6plex [N-Term]; 1xDBIA [C1]	P23919	KTHY_C163	1660.94	113	86.5	143.7	100.8	70.2	85.8
[K].LVEALCAAGHR.[A]	1xTMT6plex [N-Term]; 1xDBIA [C6]	P23919	KTHY_C31	1664.95	108.6	92	137.4	96.3	89.2	76.4
[K].RVETNQDWSLMCPNECPGLDEVWGEEFEK.[L]	1xCarbamidomethyl [C16]; 1xTMT6plex [K29]; 1xTMT6plex [N-Term]; 1xDBIA [C12]	P23921	RIR1_C352	4252.02	115.7	77.2	119.8	113.8	98	75.4
[K].RVETNQDWSLMCPNECPGLDEVWGEEFEK.[L]	1xCarbamidomethyl [C16]; 1xOxidation [M11]; 1xTMT6plex [K29]; 1xTMT6plex [N-Term]; 1xDBIA [C12]	P23921	RIR1_C352	4268.01	98.1	84.2	119.3	99.4	124.6	74.4
[K].IIDINYYPVPEACLSNK.[R]	1xTMT6plex [K17]; 1xTMT6plex [N-Term]; 1xDBIA [C13]	P23921	RIR1_C492	2706.49	108.7	96.2	138.2	98.8	86.2	71.9
[K].QIFETIYYGALEASCDLAK.[E]	1xTMT6plex [K19]; 1xTMT6plex [N-Term]; 1xDBIA [C15]	P23921	RIR1_C544	2889.55	110.8	109.1	95.5	104.8	105.3	74.6
[K].SQCALEEYVR.[S]	1xTMT6plex [N-Term]; 1xDBIA [C3]	P24468	COT2_C343	1722.9	109.8	85.8	138	94.5	99.7	72.2
[K].SYIEGYVPSQADVAVFEAVSSPPPADLCHALR.[W]	1xTMT6plex [N-Term]; 1xDBIA [C28]	P24534	EF1B_C50	3914	114	104.5	114.7	94.6	94.2	78
[R].QAVLGAGLPISTPCTTINK.[V]	1xTMT6plex [K19]; 1xTMT6plex [N-Term]; 1xDBIA [C14]	P24752	THIL_C119	2638.54	96.5	75.4	135.7	98.3	115.4	78.6
[K].AIMMASQSLMCGHQDVMVAGGMESMSNVPYVMNR.[G]	1xTMT6plex [N-Term]; 1xDBIA [C11]	P24752	THIL_C142	4200.95	83.4	103.1	98.5	90.3	138.3	86.5
[K].IHMGSCAENTAK.[K]	1xTMT6plex [K12]; 1xTMT6plex [N-Term]; 1xDBIA [C6]	P24752	THIL_C196	2016.08	98.4	87.4	134.2	91.8	108.1	80.1
[K].IHMGSCAENTAK.[K]	1xOxidation [M3]; 1xTMT6plex [K12]; 1xTMT6plex [N-Term]; 1xDBIA [C6]	P24752	THIL_C196	2032.07	84.4	79.3	151	101.3	109	74.9
[K].QGEYGLASICNGGGGASAMLIQK.[L]	1xTMT6plex [K23]; 1xTMT6plex [N-Term]; 1xDBIA [C10]	P24752	THIL_C413	2979.58	108.8	78.3	137.2	108.3	99.2	68.2
[K].QGEYGLASICNGGGGASAMLIQK.[L]	1xOxidation [M19]; 1xTMT6plex [K23]; 1xTMT6plex [N-Term]; 1xDBIA [C10]	P24752	THIL_C413	2995.57	114.9	74.5	130.3	108.1	106.4	65.9
[K].INAGFGDDLNCIFNDDNAEK.[L]	1xTMT6plex [K20]; 1xTMT6plex [N-Term]; 1xDBIA [C11]	P24928	RPB1_C1245	2939.46	100.3	58.2	123.8	89	129.5	99.1
[R].CIESNMLTDMTLQGIEQISK.[V]	1xTMT6plex [K20]; 1xTMT6plex [N-Term]; 1xDBIA [C1]	P24928	RPB1_C1287	3008.59	99	84.7	124.8	96.1	118.7	76.6
[K].GVSENIMLGQLAPAGTGCFDLLLDAEK.[C]	1xOxidation [M7]; 1xTMT6plex [K27]; 1xTMT6plex [N-Term]; 1xDBIA [C18]	P24928	RPB1_C1470	3532.88	89.6	85.6	138.4	97.3	115.1	74
[K].QIFSLIIPGHINCIR.[T]	1xTMT6plex [N-Term]; 1xDBIA [C13]	P24928	RPB1_C602	2249.32	103.1	94	171.5	76.9	73.4	81.1
[K].VVVENGELIMGILCK.[K]	1xTMT6plex [K15]; 1xTMT6plex [N-Term]; 1xDBIA [C14]	P24928	RPB1_C641	2371.39	94.9	88.1	129.3	100.8	106.8	80.1
[R].APEILLGCK.[Y]	1xTMT6plex [K9]; 1xTMT6plex [N-Term]; 1xDBIA [C8]	P24941	CDK2_C177	1698.04	108.7	104.9	145.4	88.9	86.2	65.9
[K].SFHVEDTPVCFSR.[N]	1xTMT6plex [N-Term]; 1xDBIA [C10]	P25054	APC_C2020	2049.04	93.7	90.7	158.9	95.4	84	77.4
[R].ISDLGLACDFSK.[K]	1xTMT6plex [K12]; 1xTMT6plex [N-Term]; 1xDBIA [C8]	P25098	ARBK1_C340	2023.13	120.4	97.2	144.3	95.5	74.4	68.2
[R].SVHYCPATKK.[T]	2xTMT6plex [K9; K10]; 1xTMT6plex [N-Term]; 1xDBIA [C5]	P25205	MCM3_C148	2117.25	100.7	102	148.5	94	73.4	81.4
[R].SVHYCPATK.[K]	1xTMT6plex [K9]; 1xTMT6plex [N-Term]; 1xDBIA [C5]	P25205	MCM3_C148	1759.99	103.1	96.8	160.4	86.4	82.9	70.4
[K].AILCLLLGGVER.[D]	1xTMT6plex [N-Term]; 1xDBIA [C4]	P25205	MCM3_C319	1782.09	114.8	86.2	124	93.9	101	80.1
[K].VVGCSCVVVK.[D]	1xCarbamidomethyl [C6]; 1xTMT6plex [K10]; 1xTMT6plex [N-Term]; 1xDBIA [C4]	P25398	RS12_C106	1804.06	104.2	97.5	137.9	88.7	101.8	69.9
[K].LVEALCAEHQINLIK.[V]	1xTMT6plex [K15]; 1xTMT6plex [N-Term]; 1xDBIA [C6]	P25398	RS12_C69	2448.44	85.2	96.2	104	86.7	153.8	74.1
[R].RPYGVGLLIAGYDDMGPHIFQTCPSANYFDCR.[A]	1xCarbamidomethyl [C31]; 1xTMT6plex [N-Term]; 1xDBIA [C23]	P25786	PSA1_C148	4159.02	107	94.8	141.5	106.7	85.2	64.8
[R].YLLQYQEPIPCEQLVTALCDIK.[Q]	1xCarbamidomethyl [C11]; 1xTMT6plex [K22]; 1xTMT6plex [N-Term]; 1xDBIA [C19]	P25789	PSA4_C115	3391.84	114.4	95.7	98.2	91.7	124.1	75.8
[K].ATCIGNNSAAAVSMLK.[Q]	1xTMT6plex [K16]; 1xTMT6plex [N-Term]; 1xDBIA [C3]	P25789	PSA4_C163	2305.28	117.8	92.1	142.8	98.7	75	73.5
[K].GNEFEDYCLK.[R]	1xTMT6plex [K10]; 1xTMT6plex [N-Term]; 1xDBIA [C8]	P26196	DDX6_C102	1972.03	103.7	93.2	160	90	81.3	71.9
[R].CTVEYGEDLPECVQVYSMGGPNR.[F]	1xCarbamidomethyl [C1]; 1xTMT6plex [N-Term]; 1xDBIA [C12]	P26358	DNMT1_C1071	3128.47	95.8	84.6	118.6	100.6	127.9	72.5
[K].GDVEMLCGGPPCQGFSGMNR.[F]	1xCarbamidomethyl [C7]; 1xTMT6plex [N-Term]; 1xDBIA [C12]	P26358	DNMT1_C1226	2637.22	106.5	91.5	138.1	93.5	87.7	82.7
[R].ACQLSVVVDDKK.[F]	2xTMT6plex [K11; K12]; 1xTMT6plex [N-Term]; 1xDBIA [C2]	P26358	DNMT1_C1339	2288.36	113.9	81.2	117.7	99.7	101.6	86
[R].GVCSCVEAGK.[A]	1xCarbamidomethyl [C3]; 1xTMT6plex [K10]; 1xTMT6plex [N-Term]; 1xDBIA [C5]	P26358	DNMT1_C1478	1763.95	104.4	94.6	148.2	95.1	86.1	71.6
[K].ACDPAAR.[Q]	1xTMT6plex [N-Term]; 1xDBIA [C2]	P26358	DNMT1_C1485	1228.67	114	92.1	175.5	102.3	53.1	63.1
[R].QFNTLIPWCLPHTGNR.[H]	1xTMT6plex [N-Term]; 1xDBIA [C9]	P26358	DNMT1_C1499	2422.3	114.2	85.8	176.5	112.1	47.5	64
[K].SIEIPRPVDGVEVPGCGK.[I]	1xTMT6plex [K18]; 1xTMT6plex [N-Term]; 1xDBIA [C16]	P26368	U2AF2_C429	2606.47	93.4	86.2	132.3	94.4	120	73.7
[K].IFVEFTSVFDCQK.[A]	1xTMT6plex [K13]; 1xTMT6plex [N-Term]; 1xDBIA [C11]	P26368	U2AF2_C442	2317.27	105.5	77.2	117.4	98.2	125	76.7
[K].RGSDELFSTCVTNGPFIMSSNSASAANGNDSK.[K]	1xTMT6plex [K32]; 1xTMT6plex [N-Term]; 1xDBIA [C10]	P26599	PTBP1_C23	4018.96	101.2	81.4	136.7	103.6	111.1	65.9
[R].GSDELFSTCVTNGPFIMSSNSASAANGNDSK.[K]	1xOxidation [M17]; 1xTMT6plex [K31]; 1xTMT6plex [N-Term]; 1xDBIA [C9]	P26599	PTBP1_C23	3878.86	93.7	88.2	134.1	88.4	121.9	73.7
[R].GSDELFSTCVTNGPFIMSSNSASAANGNDSKK.[F]	2xTMT6plex [K31; K32]; 1xTMT6plex [N-Term]; 1xDBIA [C9]	P26599	PTBP1_C23	4220.12	90.8	83.2	141.1	95.3	102.7	86.9
[R].GSDELFSTCVTNGPFIMSSNSASAANGNDSK.[K]	1xTMT6plex [K31]; 1xTMT6plex [N-Term]; 1xDBIA [C9]	P26599	PTBP1_C23	3862.86	95.7	82.1	130.3	93.9	118.9	79.1
[K].LSLDGQNIYNACCTLR.[I]	1xCarbamidomethyl [C12]; 1xTMT6plex [N-Term]; 1xDBIA [C13]	P26599	PTBP1_C251	2366.22	115.4	90.4	123.9	96	89.6	84.6
[R].DQELYFFHELSPGSCFFLPK.[G]	1xTMT6plex [K20]; 1xTMT6plex [N-Term]; 1xDBIA [C15]	P26639	SYTC_C343	3158.64	105.5	93.4	143.5	99	89.7	68.8
[K].FMADIDLDPGCTLNK.[K]	1xTMT6plex [K15]; 1xTMT6plex [N-Term]; 1xDBIA [C11]	P26639	SYTC_C656	2407.28	129	87	139.3	94.7	79.7	70.3
[R].ACFTMDPK.[L]	1xTMT6plex [K8]; 1xTMT6plex [N-Term]; 1xDBIA [C2]	P26640	SYVC_C444	1666.91	124.2	100.6	167.9	90.6	57	59.7
[K].KAAAPAPEEEMDECEQALAAEPK.[A]	2xTMT6plex [K1; K23]; 1xTMT6plex [N-Term]; 1xDBIA [C14]	P26641	EF1G_C266	3411.77	82.1	79.4	77.8	77.4	219.7	63.6
[K].AAAPAPEEEMDECEQALAAEPK.[A]	1xTMT6plex [K22]; 1xTMT6plex [N-Term]; 1xDBIA [C13]	P26641	EF1G_C266	3054.52	60.9	68.7	75.4	68	256.2	70.8
[K].AAAPAPEEEMDECEQALAAEPK.[A]	1xOxidation [M10]; 1xTMT6plex [K22]; 1xTMT6plex [N-Term]; 1xDBIA [C13]	P26641	EF1G_C266	3070.51	67.6	61.6	71.4	66.4	266.5	66.4
[R].FPEELTQTFMSCNLITGMFQR.[L]	1xTMT6plex [N-Term]; 1xDBIA [C12]	P26641	EF1G_C339	3018.51	107	87.3	99.2	89.8	144.2	72.5
[K].VPAFEGDDGFCVFESNAIAYYVSNEELR.[G]	1xTMT6plex [N-Term]; 1xDBIA [C11]	P26641	EF1G_C68	3666.76	94.1	90.2	108.9	95.1	147.1	64.5
[K].GTVCQR.[I]	1xTMT6plex [N-Term]; 1xDBIA [C4]	P27144	KAD4_C22	1188.67	87	67.3	156.6	94.3	122.8	72.1
[R].YLAEVACGDDRK.[Q]	1xTMT6plex [K12]; 1xTMT6plex [N-Term]; 1xDBIA [C7]	P27348	1433T_C134	2094.14	122.3	77.9	146.8	106.8	79.4	66.8
[R].YLAEVACGDDR.[K]	1xTMT6plex [N-Term]; 1xDBIA [C7]	P27348	1433T_C134	1736.88	107.5	85.5	130.8	89.8	108.7	77.7
[R].SICTTVLELLDK.[Y]	1xTMT6plex [K12]; 1xTMT6plex [N-Term]; 1xDBIA [C3]	P27348	1433T_C94	2089.23	124.9	94.6	118.4	88.7	99.9	73.5
[K].MTAYITELSDMVPTCSALAR.[K]	1xTMT6plex [N-Term]; 1xDBIA [C15]	P27540	ARNT_C119	2698.38	121.8	99.4	144.9	94.3	70	69.5
[K].MLSCAGADR.[L]	1xTMT6plex [N-Term]; 1xDBIA [C4]	P27635	RL10_C105	1448.76	133.3	93.1	150	104.3	61.9	57.4
[R].LIPDGCGVK.[Y]	1xTMT6plex [K9]; 1xTMT6plex [N-Term]; 1xDBIA [C6]	P27635	RL10_C195	1655.99	117.5	93.7	163.4	97.1	60.7	67.7
[K].VDEFPLCGHMVSDEYEQLSSEALEAAR.[I]	1xOxidation [M10]; 1xTMT6plex [N-Term]; 1xDBIA [C7]	P27635	RL10_C49	3566.7	103.1	98.2	144.4	91.2	95.5	67.6
[K].VDEFPLCGHMVSDEYEQLSSEALEAAR.[I]	1xTMT6plex [N-Term]; 1xDBIA [C7]	P27635	RL10_C49	3550.7	103.5	101.5	127.9	99	97.2	70.9
[K].DSLVDIIGICK.[S]	1xTMT6plex [K11]; 1xTMT6plex [N-Term]; 1xDBIA [C10]	P27694	RFA1_C323	1930.14	110.2	84.6	136.1	99	93.1	76.9
[K].VAEPELMGTPDGTCYPPPPVPR.[Q]	1xTMT6plex [N-Term]; 1xDBIA [C14]	P27708	PYR1_C1889	2848.46	128.5	90.2	156.6	96.9	63.4	64.4
[K].VAEPELMGTPDGTCYPPPPVPR.[Q]	1xOxidation [M7]; 1xTMT6plex [N-Term]; 1xDBIA [C14]	P27708	PYR1_C1889	2864.45	125.9	81.6	151.7	90.5	87.6	62.7
[K].GESLADSVQTMSCYADVVVLR.[H]	1xTMT6plex [N-Term]; 1xDBIA [C13]	P27708	PYR1_C2016	2768.42	124.1	90.6	160.9	97.7	60.2	66.5
[K].AQILVLTYPLIGNYGIPPDEMDEFGLCK.[W]	1xTMT6plex [K28]; 1xTMT6plex [N-Term]; 1xDBIA [C27]	P27708	PYR1_C73	3864.07	116.8	108.4	125.7	88.4	97.3	63.4
[K].IGSCMK.[S]	1xTMT6plex [K6]; 1xTMT6plex [N-Term]; 1xDBIA [C4]	P27708	PYR1_C758	1392.81	144.8	86.2	167.9	103	38.9	59.2
[K].HEQNIDCGGGYVK.[L]	1xTMT6plex [K13]; 1xTMT6plex [N-Term]; 1xDBIA [C7]	P27797	CALR_C105	2174.14	100.6	94	138.7	103.1	74.7	88.9
[K].LFPNSLDQTDMHGDSEYNIMFGPDICGPGTK.[K]	1xTMT6plex [K31]; 1xTMT6plex [N-Term]; 1xDBIA [C26]	P27797	CALR_C137	4154.01	59.7	57.5	87.5	65	219.4	110.9
[K].MAYQEYPNSQNWPEDTNFCFQPEQVVDPIQTDPFK.[M]	1xTMT6plex [K35]; 1xTMT6plex [N-Term]; 1xDBIA [C19]	P27816	MAP4_C126	4960.36	84.3	135.2	133.9	93.2	95.7	57.7
[K].LNKPFLFDTKPLIVQYEVNFQNGIECGGAYVK.[L]	3xTMT6plex [K3; K10; K32]; 1xTMT6plex [N-Term]; 1xDBIA [C26]	P27824	CALX_C160	4857.72	121.9	84.4	109.8	69.8	121.2	92.9
[K].CGEDYK.[L]	1xTMT6plex [K6]; 1xTMT6plex [N-Term]; 1xDBIA [C1]	P27824	CALX_C194	1468.79	126.2	73.6	150.1	65.4	98	86.7
[K].VIEINPYLLGTMAGGAADCSFWER.[L]	1xTMT6plex [N-Term]; 1xDBIA [C19]	P28074	PSB5_C111	3138.6	123.7	88.3	142.6	90.1	90	65.3
[R].SGANVLICGPNGCGK.[S]	1xCarbamidomethyl [C8]; 1xTMT6plex [K15]; 1xTMT6plex [N-Term]; 1xDBIA [C13]	P28288	ABCD3_C477	2201.19	109.5	81.2	148.5	93.3	93.7	73.9
[K].VLFLLGADGGCITR.[Q]	1xTMT6plex [N-Term]; 1xDBIA [C11]	P28331	NDUS1_C554	1960.13	99	75	128.6	96.2	119.8	81.4
[K].VVAACAMPVMK.[G]	1xTMT6plex [K11]; 1xTMT6plex [N-Term]; 1xDBIA [C5]	P28331	NDUS1_C92	1874.08	101.4	74.3	130.1	93.6	107.2	93.3
[R].CQGSLHEDVICTSR.[D]	1xCarbamidomethyl [C11]; 1xTMT6plex [N-Term]; 1xDBIA [C1]	P28340	DPOD1_C1061	2130.06	112.9	97.5	144.5	85.1	83.7	76.3
[K].GIFPEPERDPVIQICSLGLR.[W]	1xTMT6plex [N-Term]; 1xDBIA [C15]	P28340	DPOD1_C338	2764.54	105	97.1	136	97.1	92.8	72
[R].DLKPSNLLINTTCDLK.[I]	2xTMT6plex [K3; K16]; 1xTMT6plex [N-Term]; 1xDBIA [C13]	P28482	MK01_C161	2771.63	111.4	93.2	129.8	97.4	97	71.2
[K].ICDFGLAR.[DVIS]	1xTMT6plex [N-Term]; 1xDBIA [C2]	P28482	MK01_C166	1419.8	126.5	91.3	157.5	101.5	47.1	76.1
[K].ISPFEHQTYCQR.[T]	1xTMT6plex [N-Term]; 1xDBIA [C10]	P28482	MK01_C65	2034.04	97.7	96	140.9	92.8	87.4	85.2
[R].AAVAAGCR.[Q]	1xTMT6plex [N-Term]; 1xDBIA [C7]	P28838	AMPL_C129	1243.71	99.3	94.6	149.5	85.4	98.8	72.3
[K].LNLPINIIGLAPLCENMPSGK.[A]	1xTMT6plex [K21]; 1xTMT6plex [N-Term]; 1xDBIA [C14]	P28838	AMPL_C335	2961.7	101.8	72.8	105.2	83.1	154.5	82.6
[R].LILADALCYAHTFNPK.[V]	1xTMT6plex [K16]; 1xTMT6plex [N-Term]; 1xDBIA [C8]	P28838	AMPL_C376	2544.44	109.2	86.3	146.1	94.9	87	76.5
[K].SCQFSVDEEFQK.[L]	1xTMT6plex [K12]; 1xTMT6plex [N-Term]; 1xDBIA [C2]	P29084	T2EB_C208	2201.13	137.8	82.5	136.8	98.2	74.9	69.7
[R].AGQPHSSSDAAQAPAEQPHSSSDAAQAPCPR.[E]	1xTMT6plex [N-Term]; 1xDBIA [C29]	P29372	3MG_C56	3581.7	82.7	91.9	122.9	101.2	114.7	86.6
[K].CYASDQEVLDMHGFLR.[Q]	1xTMT6plex [N-Term]; 1xDBIA [C1]	P29590	PML_C338	2409.19	112.9	95	181.4	86.9	69.7	54.2
[R].LQDLSSCITQGK.[D]	1xTMT6plex [K12]; 1xTMT6plex [N-Term]; 1xDBIA [C7]	P29590	PML_C389	2047.16	126.4	94.7	138.9	94.6	79.2	66.2
[K].DINAYNCEEPTEK.[L]	1xTMT6plex [K13]; 1xTMT6plex [N-Term]; 1xDBIA [C7]	P30041	PRDX6_C91	2280.16	114.2	87.5	122.1	87.4	126.2	62.6
[K].GVLFGVPGAFTPGCSK.[T]	1xTMT6plex [K16]; 1xTMT6plex [N-Term]; 1xDBIA [C14]	P30044	PRDX5_C100	2291.3	118.1	100.7	169.3	93.4	59.4	59
[K].ALNVEPDGTGLTCSLAPNIISQL.[-]	1xTMT6plex [N-Term]; 1xDBIA [C13]	P30044	PRDX5_C204	2851.54	82.4	67.4	94.2	83	186.5	86.5
[K].AFQYVETHGEVCPANWTPDSPTIKPSPAASK.[E]	2xTMT6plex [K24; K31]; 1xTMT6plex [N-Term]; 1xDBIA [C12]	P30048	PRDX3_C229	4312.27	88.9	94.6	124	92.3	116	84.2
[K].EILGTAQSVGCNVDGR.[H]	1xTMT6plex [N-Term]; 1xDBIA [C11]	P30050	RL12_C141	2144.13	104.1	89.1	139.5	92.2	93.6	81.6
[R].HPHDIIDDINSGAVECPAS.[-]	1xTMT6plex [N-Term]; 1xDBIA [C16]	P30050	RL12_C162	2515.24	91	73.9	116.9	84.6	151.4	82.2
[R].CTGGEVGATSALAPK.[I]	1xTMT6plex [K15]; 1xTMT6plex [N-Term]; 1xDBIA [C1]	P30050	RL12_C17	2116.18	116.8	94.7	159.2	88.7	73.7	66.9
[K].EMQNLSFQDCYSSK.[F]	1xTMT6plex [K14]; 1xTMT6plex [N-Term]; 1xDBIA [C10]	P30084	ECHM_C111	2434.21	90.7	64.9	122.9	91.4	132	98
[K].ALNALCDGLIDELNQALK.[T]	1xTMT6plex [K18]; 1xTMT6plex [N-Term]; 1xDBIA [C6]	P30084	ECHM_C62	2668.51	74	70.6	64.6	112.1	171.3	107.4
[R].APVAGTCYQAEWDDYVPK.[L]	1xTMT6plex [K18]; 1xTMT6plex [N-Term]; 1xDBIA [C7]	P30086	PEBP1_C168	2767.42	104.8	94	167.2	84.6	84.8	64.6
[K].FIQENIFGICPHMTEDNKDLIQGK.[D]	2xTMT6plex [K18; K24]; 1xTMT6plex [N-Term]; 1xDBIA [C10]	P30101	PDIA3_C244	3774.03	66	88.9	103.9	84.2	166.9	90.1
[K].VDCTANTNTCNK.[Y]	1xCarbamidomethyl [C3]; 1xTMT6plex [K12]; 1xTMT6plex [N-Term]; 1xDBIA [C10]	P30101	PDIA3_C92	2095.07	101.4	82	133.4	100	107.2	76
[K].EFCENLSADCR.[E]	1xCarbamidomethyl [C3]; 1xTMT6plex [N-Term]; 1xDBIA [C10]	P30153	2AAA_C317	1868.88	96.2	90.6	160.1	95.8	92.2	65.2
[K].DECPEVR.[L]	1xTMT6plex [N-Term]; 1xDBIA [C3]	P30153	2AAA_C377	1372.71	102.1	88.4	113.7	84.6	138.1	73
[K].DNTIEHLLPLFLAQLKDECPEVR.[L]	1xTMT6plex [K16]; 1xTMT6plex [N-Term]; 1xDBIA [C19]	P30153	2AAA_C377	3447.91	104.2	90.5	94.8	93.6	149.3	67.6
[K].GSECYQK.[S]	1xTMT6plex [K7]; 1xTMT6plex [N-Term]; 1xDBIA [C4]	P30260	CDC27_C137	1568.85	111.9	94.9	148.3	95.6	74.2	75.2
[K].SLSLNPFLWSPFESLCEIGEKPDPDQTFK.[F]	2xTMT6plex [K21; K29]; 1xTMT6plex [N-Term]; 1xDBIA [C16]	P30260	CDC27_C156	4308.29	93	80	124.4	88.3	131.5	82.8
[K].ALDINPQSSVLLCHIGVVQHALK.[K]	1xTMT6plex [K23]; 1xTMT6plex [N-Term]; 1xDBIA [C13]	P30260	CDC27_C673	3209.86	93.3	86.2	135	86.9	115.8	82.8
[K].GHSCTTPQCK.[Y]	1xCarbamidomethyl [C4]; 1xTMT6plex [K10]; 1xTMT6plex [N-Term]; 1xDBIA [C9]	P30260	CDC27_C71	1872.98	94.2	84.3	138.4	107.8	93.7	81.5
[R].KCPFYAAEQDK.[G]	2xTMT6plex [K1; K11]; 1xTMT6plex [N-Term]; 1xDBIA [C2]	P30519	HMOX2_C265	2283.28	158.2	108.5	199.9	76.1	25.7	31.5
[K].CPFYAAEQDK.[G]	1xTMT6plex [K10]; 1xTMT6plex [N-Term]; 1xDBIA [C1]	P30519	HMOX2_C265	1926.02	142.7	100.6	206.4	80.9	31.5	37.9
[K].GALEGSSCPFR.[T]	1xTMT6plex [N-Term]; 1xDBIA [C8]	P30519	HMOX2_C282	1648.87	305.2	171.7	81.5	20.2	10.4	10.8
[R].MCDLVSDFDGFSER.[F]	1xTMT6plex [N-Term]; 1xDBIA [C2]	P30520	PURA2_C182	2146.01	122.2	83.9	145.8	89.3	88.6	70.2
[K].VVDLLAQDADIVCR.[C]	1xTMT6plex [N-Term]; 1xDBIA [C13]	P30520	PURA2_C58	2055.15	119.8	87.2	143.8	91.5	87.6	70
[R].YASPEMCFVFSDR.[Y]	1xTMT6plex [N-Term]; 1xDBIA [C7]	P30566	PUR8_C27	2077.01	117	89.8	128.4	90.5	105.7	68.7
[R].TPDGNLDQCK.[-]	1xTMT6plex [K10]; 1xTMT6plex [N-Term]; 1xDBIA [C9]	P30825	CTR1_C628	1844.99	138.1	95	169.4	80.9	57.5	59.1
[K].TIPMDGQHFCFTR.[H]	1xTMT6plex [N-Term]; 1xDBIA [C10]	P30837	AL1B1_C169	2078.05	111.3	80.6	135.2	96.2	93.9	82.9
[R].HEPVGVCGQIIPWNFPLVMQGWK.[L]	1xTMT6plex [K23]; 1xTMT6plex [N-Term]; 1xDBIA [C7]	P30837	AL1B1_C179	3389.84	121	80.3	126.5	96	96.1	80
[R].DCQIAHGAAQFLR.[E]	1xTMT6plex [N-Term]; 1xDBIA [C2]	P30876	RPB2_C1093	1955.05	118.3	91.4	159.2	98.6	67.5	65.1
[R].LFEASDPYQVHVCNLCGIMAIANTR.[T]	1xCarbamidomethyl [C16]; 1xTMT6plex [N-Term]; 1xDBIA [C13]	P30876	RPB2_C1119	3347.69	94.5	87.5	135.3	93.8	109.6	79.2
[K].YAYTGECR.[S]	1xTMT6plex [N-Term]; 1xDBIA [C7]	P30876	RPB2_C221	1487.75	94.9	68.7	199.8	87.4	78.7	70.4
[R].SCLENSSRPTSTIWVSMLAR.[G]	1xTMT6plex [N-Term]; 1xDBIA [C2]	P30876	RPB2_C224	2763.45	113.7	81.8	148.4	82.2	97.4	76.4
[K].IFVNGCWVGIHKDPEQLMNTLR.[K]	1xTMT6plex [K12]; 1xTMT6plex [N-Term]; 1xDBIA [C6]	P30876	RPB2_C572	3324.81	117.3	66	143.6	102.8	81.5	88.8
[R].ETCQGMR.[H]	1xTMT6plex [N-Term]; 1xDBIA [C3]	P30876	RPB2_C837	1349.69	136.1	78.3	149.8	88.3	80.9	66.6
[K].ICDQISDAVLDAHLQQDPDAK.[V]	1xTMT6plex [K21]; 1xTMT6plex [N-Term]; 1xDBIA [C2]	P31153	METK2_C34	3049.6	123.1	99.6	158.7	107.3	60.1	51.2
[K].VACETVAK.[T]	1xTMT6plex [K8]; 1xTMT6plex [N-Term]; 1xDBIA [C3]	P31153	METK2_C56	1574.93	132.4	97	157.5	117	51.9	44.1
[R].GNLAHCYSAEELVHR.[D]	1xTMT6plex [N-Term]; 1xDBIA [C6]	P31270	HXA11_C82	2224.15	105.2	92.9	133.6	101.5	84.1	82.6
[K].SCAQPASAAAAAAFADK.[Y]	1xTMT6plex [K17]; 1xTMT6plex [N-Term]; 1xDBIA [C2]	P31271	HXA13_C194	2305.24	112.3	82.3	137.9	102.1	92.8	72.6
[R].ADCGPGEGR.[S]	1xTMT6plex [N-Term]; 1xDBIA [C3]	P31274	HXC9_C130	1386.7	109.8	83.5	137	88.8	74.9	106
[K].APEPVCAAPGPPHGPAGAASNFYSAVGR.[N]	1xTMT6plex [N-Term]; 1xDBIA [C6]	P31277	HXD11_C148	3173.62	64.3	90.3	124.6	84.4	157.5	79
[R].EFLFNAIETMPCVK.[K]	1xOxidation [M10]; 1xTMT6plex [K14]; 1xTMT6plex [N-Term]; 1xDBIA [C12]	P31350	RIR2_C202	2412.31	105.2	91.1	117.8	102.3	97.6	86
[K].ITDFGLCK.[E]	1xTMT6plex [K8]; 1xTMT6plex [N-Term]; 1xDBIA [C7]	P31751	AKT2_C297	1650.97	122.4	97.4	158.5	96.5	58.8	66.3
[K].AVELLGDIVQNCSLEDSQIEK.[E]	1xTMT6plex [K21]; 1xTMT6plex [N-Term]; 1xDBIA [C12]	P31930	QCR1_C154	3057.65	67.5	58	78.7	68.5	254.6	72.6
[K].HLGGIPWTYAEDAVPTLTPCR.[F]	1xTMT6plex [N-Term]; 1xDBIA [C20]	P31930	QCR1_C268	2822.49	94.4	73.3	127.5	90.5	124.8	89.5
[R].NALVSHLDGTTPVCEDIGR.[S]	1xTMT6plex [N-Term]; 1xDBIA [C14]	P31930	QCR1_C410	2522.32	82.7	68.4	101.8	77	189.4	80.9
[K].YIYDQCPAVAGYGPIEQLPDYNR.[I]	1xTMT6plex [N-Term]; 1xDBIA [C6]	P31930	QCR1_C453	3170.58	96.4	80.8	120.7	92.3	125.8	84
[K].LPITVLNGAPGFINLCDALNAWQLVK.[E]	1xTMT6plex [K26]; 1xTMT6plex [N-Term]; 1xDBIA [C16]	P31939	PUR9_C241	3535.03	112.7	99.6	114.2	97.7	100.6	75.2
[K].VCMVYDLYK.[T]	1xTMT6plex [K9]; 1xTMT6plex [N-Term]; 1xDBIA [C2]	P31939	PUR9_C287	1888.05	122.9	88.2	154.3	95.7	66	72.9
[R].YGDGGSTFQSTTGHCVHMR.[G]	1xTMT6plex [N-Term]; 1xDBIA [C15]	P31943	HNRH1_C290	2566.21	80.3	88.5	139.1	88.4	126.3	77.5
[K].ALSVGNIDDALQCYSEAIK.[L]	1xTMT6plex [K19]; 1xTMT6plex [N-Term]; 1xDBIA [C13]	P31948	STIP1_C26	2764.5	102.2	84.7	124.7	98.8	114.4	75.1
[K].GNECFQK.[G]	1xTMT6plex [K7]; 1xTMT6plex [N-Term]; 1xDBIA [C4]	P31948	STIP1_C370	1579.87	104.6	96.5	124.1	88.5	93.9	92.4
[R].AACYTK.[L]	1xTMT6plex [K6]; 1xTMT6plex [N-Term]; 1xDBIA [C3]	P31948	STIP1_C403	1410.82	125.3	92.6	126.9	96.7	86.5	72
[K].AYEDGCK.[T]	1xTMT6plex [K7]; 1xTMT6plex [N-Term]; 1xDBIA [C6]	P31948	STIP1_C62	1539.82	120.3	88.1	169.1	87.1	70.7	64.7
[R].LVQAFQYTDEHGEVCPAGWKPGSDTIKPNVDDSK.[E]	3xTMT6plex [K20; K27; K34]; 1xTMT6plex [N-Term]; 1xDBIA [C15]	P32119	PRDX2_C172	4944.6	98.3	91.1	94.6	95.6	128.5	92
[K].DLFAECAK.[I]	1xTMT6plex [K8]; 1xTMT6plex [N-Term]; 1xDBIA [C6]	P32780	TF2H1_C246	1650.93	110.3	82.2	143.6	97.7	91.2	74.9
[R].TICSHVQNMIK.[G]	1xTMT6plex [K11]; 1xTMT6plex [N-Term]; 1xDBIA [C3]	P32969	RL9_C74	2028.15	119.8	92.3	120.7	108	90.2	68.9
[R].FVCSPDEVMDTIDEGK.[S]	1xTMT6plex [K16]; 1xTMT6plex [N-Term]; 1xDBIA [C3]	P33176	KINH_C174	2539.28	107.3	93.9	145.2	101.9	79.5	72.1
[K].CEEEIAK.[L]	1xTMT6plex [K7]; 1xTMT6plex [N-Term]; 1xDBIA [C1]	P33176	KINH_C421	1575.88	125.3	85.6	149.1	99.3	71.9	68.6
[R].IAQLICER.[I]	1xTMT6plex [N-Term]; 1xDBIA [C6]	P33316	DUT_C222	1470.87	133	100.4	139.5	93.8	71.5	61.8
[R].VPVNLLNSPDCDVK.[T]	1xTMT6plex [K14]; 1xTMT6plex [N-Term]; 1xDBIA [C11]	P33981	TTK_C284	2267.28	109.1	114.6	125	96.5	77.1	77.7
[K].LVIWGTDVNVAACK.[E]	1xTMT6plex [K14]; 1xTMT6plex [N-Term]; 1xDBIA [C13]	P33991	MCM4_C162	2243.3	117.8	94.6	145	87.6	82.3	72.7
[R].QLVLQTGALVLSDNGICCIDEFDK.[M]	1xCarbamidomethyl [C18]; 1xTMT6plex [K24]; 1xTMT6plex [N-Term]; 1xDBIA [C17]	P33991	MCM4_C571	3405.82	97.6	87.9	108.8	96.9	133	75.9
[K].AGIICQLNAR.[T]	1xTMT6plex [N-Term]; 1xDBIA [C5]	P33991	MCM4_C605	1583.93	111.9	91.2	157.7	97.7	74.6	66.9
[K].CPLDPYFIMPDK.[C]	1xTMT6plex [K12]; 1xTMT6plex [N-Term]; 1xDBIA [C1]	P33992	MCM5_C207	2193.19	120.5	88.4	160.2	93.6	70.7	66.6
[K].CVDFQTLK.[L]	1xTMT6plex [K8]; 1xTMT6plex [N-Term]; 1xDBIA [C1]	P33992	MCM5_C221	1707.99	121.5	88.8	153.6	93.8	67	75.2
[R].GNINICLMGDPGVAK.[S]	1xTMT6plex [K15]; 1xTMT6plex [N-Term]; 1xDBIA [C6]	P33993	MCM7_C378	2256.26	100.3	85.4	133.5	94.3	110.3	76.1
[K].LIIAGTSCYSR.[N]	1xTMT6plex [N-Term]; 1xDBIA [C8]	P34896	GLYC_C204	1708.96	90.5	91.1	112.1	94.6	85.5	126.2
[R].AVLEALGSCLNNK.[Y]	1xTMT6plex [K13]; 1xTMT6plex [N-Term]; 1xDBIA [C9]	P34896	GLYC_C68	2086.21	126.8	96.8	154.2	97.1	64.7	60.4
[R].GLELIASENFCSR.[A]	1xTMT6plex [N-Term]; 1xDBIA [C11]	P34897	GLYM_C80	1964.05	98.4	71.8	137.7	88.4	131.6	72.1
[R].AALEALGSCLNNK.[Y]	1xTMT6plex [K13]; 1xTMT6plex [N-Term]; 1xDBIA [C9]	P34897	GLYM_C91	2058.18	95.2	79.8	121.9	85.1	133.3	84.8
[K].FDEVLVNHFCEEFGK.[K]	1xTMT6plex [K15]; 1xTMT6plex [N-Term]; 1xDBIA [C10]	P34932	HSP74_C245	2567.34	107.2	83.4	133.7	97.9	100.2	77.5
[K].LMSANASDLPLSIECFMNDVDVSGTMNR.[G]	1xOxidation [M26]; 1xTMT6plex [N-Term]; 1xDBIA [C15]	P34932	HSP74_C290	3571.71	110.3	80.2	132.3	102.9	89.3	85
[R].CTPACISFGPK.[N]	1xCarbamidomethyl [C5]; 1xTMT6plex [K11]; 1xTMT6plex [N-Term]; 1xDBIA [C1]	P34932	HSP74_C34	1935.06	115.5	87.6	172.9	96.8	59.8	67.4
[R].WNSPAEEGSSDCEVFSK.[N]	1xTMT6plex [K17]; 1xTMT6plex [N-Term]; 1xDBIA [C12]	P34932	HSP74_C417	2626.29	112.7	88.3	140	89	89.3	80.7
[K].ELTSTCSPIISKPKPK.[V]	3xTMT6plex [K12; K14; K16]; 1xTMT6plex [N-Term]; 1xDBIA [C6]	P34932	HSP74_C779	2941.79	123.9	90.5	145.5	97.7	71.9	70.4
[R].VFPLSCAVQQYAWGK.[M]	1xTMT6plex [K15]; 1xTMT6plex [N-Term]; 1xDBIA [C6]	P34949	MPI_C11	2451.36	135.1	100.3	149.6	90.7	54.5	69.7
[K].GATGLSNLGNTCFMNSSIQCVSNTQPLTQYFISGR.[H]	1xCarbamidomethyl [C20]; 1xTMT6plex [N-Term]; 1xDBIA [C12]	P35125	UBP6_C541	4292.11	119	83.8	162.8	104	60.6	69.8
[K].TIPCFNPNTLLPDPLLR.[D]	1xTMT6plex [N-Term]; 1xDBIA [C4]	P35219	CAH8_C200	2449.38	108.6	85.5	124.2	86.5	113.5	81.7
[R].LESIISGAALMADSSCTR.[D]	1xTMT6plex [N-Term]; 1xDBIA [C16]	P35221	CTNA1_C324	2350.23	113.2	80.3	134.6	93.4	93.2	85.3
[R].TIADHCPDSACK.[Q]	1xCarbamidomethyl [C11]; 1xTMT6plex [K12]; 1xTMT6plex [N-Term]; 1xDBIA [C6]	P35221	CTNA1_C767	2072.07	104	84.7	104.8	93.9	127.9	84.6
[R].GVQDIVVGEGTHFLIPWVQKPIIFDCR.[S]	1xTMT6plex [K20]; 1xTMT6plex [N-Term]; 1xDBIA [C26]	P35232	PHB1_C69	3821.13	95.9	81.5	123.9	91.1	128.8	78.8
[K].CVDEVAFQEEVVAVLKK.[S]	2xTMT6plex [K16; K17]; 1xTMT6plex [N-Term]; 1xDBIA [C1]	P35249	RFC4_C48	2889.67	111.2	71.9	152.6	116	79.8	68.6
[R].QDPVTYISETDEEDDFMCK.[K]	1xTMT6plex [K19]; 1xTMT6plex [N-Term]; 1xDBIA [C18]	P35251	RFC1_C118	3019.43	90.1	79.4	113.7	91.2	138.7	86.9
[K].TIIGQQGDQSCANK.[L]	1xTMT6plex [K14]; 1xTMT6plex [N-Term]; 1xDBIA [C11]	P35251	RFC1_C607	2217.21	126.6	83	142.6	82.7	93.1	72.1
[R].QVLHNLSMWCAR.[S]	1xTMT6plex [N-Term]; 1xDBIA [C10]	P35251	RFC1_C822	1983.06	103.5	91.8	159.3	91.5	80.6	73.2
[K].FTLDCTHPVEDGIMDAANFEQFLQER.[I]	1xTMT6plex [N-Term]; 1xDBIA [C5]	P35268	RL22_C25	3551.71	115.9	84.2	100.5	97.6	131.9	69.9
[R].TVVNISSLCALQPFK.[G]	1xTMT6plex [K15]; 1xTMT6plex [N-Term]; 1xDBIA [C9]	P35270	SPRE_C159	2374.39	116.8	88.3	124	98.2	102	70.6
[R].ADGGGAGGAPASSSSSSVAAAAASGQCR.[G]	1xTMT6plex [N-Term]; 1xDBIA [C27]	P35453	HXD13_C40	2833.37	103	83.9	156.7	96.3	86.8	73.3
[KR].GPNVCGSR.[YF]	1xTMT6plex [N-Term]; 1xDBIA [C5]	P35555	FBN1_C59	1314.71	121.5	102.9	202.5	97.1	31.8	44.3
[R].VGADNHVLPLDCVTLQTFLAK.[C]	1xTMT6plex [K21]; 1xTMT6plex [N-Term]; 1xDBIA [C12]	P35573	GDE_C126	3008.7	108.9	95.1	117.5	104.6	98.5	75.3
[K].MEDSVGCLETAEEVKR.[K]	1xTMT6plex [K15]; 1xTMT6plex [N-Term]; 1xDBIA [C7]	P35579	MYH9_C1379	2550.33	110.3	93	121.4	97.6	104.1	73.6
[K].KMEDSVGCLETAEEVK.[R]	2xTMT6plex [K1; K16]; 1xTMT6plex [N-Term]; 1xDBIA [C8]	P35579	MYH9_C1379	2751.49	105	87.8	121.9	97	115.8	72.4
[K].MEDSVGCLETAEEVK.[R]	1xTMT6plex [K15]; 1xTMT6plex [N-Term]; 1xDBIA [C7]	P35579	MYH9_C1379	2394.23	101.9	79	100.4	90.1	147.4	81.3
[R].CQHLQAEK.[K]	1xTMT6plex [K8]; 1xTMT6plex [N-Term]; 1xDBIA [C1]	P35579	MYH9_C931	1710.97	109.5	98.4	142.8	112.2	63	74.2
[K].ELACEVK.[V]	1xTMT6plex [K7]; 1xTMT6plex [N-Term]; 1xDBIA [C4]	P35580	MYH10_C1238	1545.91	101	86.4	143.1	92.5	99.9	77
[K].DMGSCEIYPQTIQHNPNGR.[F]	1xTMT6plex [N-Term]; 1xDBIA [C5]	P35606	COPB2_C351	2685.31	111.7	93.6	143.7	101.2	80.4	69.4
[K].SASLDNGGCALTTFSVLEGEK.[N]	1xTMT6plex [K21]; 1xTMT6plex [N-Term]; 1xDBIA [C9]	P35610	SOAT1_C92	2853.51	123.5	89.9	126.7	96.6	95.2	68.1
[K].KYSDVEVPASVTGYSFASDGDSGTCSPLR.[H]	1xTMT6plex [K1]; 1xTMT6plex [N-Term]; 1xDBIA [C25]	P35611	ADDA_C430	3749.87	118.2	90.1	135.3	103.3	86.5	66.6
[K].YSDVEVPASVTGYSFASDGDSGTCSPLR.[H]	1xTMT6plex [N-Term]; 1xDBIA [C24]	P35611	ADDA_C430	3392.62	110.9	82.5	135.9	101.9	97.1	71.8
[K].ACFQVGTSEEMK.[M]	1xOxidation [M11]; 1xTMT6plex [K12]; 1xTMT6plex [N-Term]; 1xDBIA [C2]	P35658	NU214_C728	2100.09	98	77.4	148.8	102.1	89	84.7
[K].VAQATCKL.[-]	1xTMT6plex [K7]; 1xTMT6plex [N-Term]; 1xDBIA [C6]	P35914	HMGCL_C323	1587.97	121.3	72.3	160.1	99.2	68.1	79
[K].VAQATCK.[L]	1xTMT6plex [K7]; 1xTMT6plex [N-Term]; 1xDBIA [C6]	P35914	HMGCL_C323	1474.88	99.8	74	140.6	97.6	118.1	69.9
[K].IDPTVTMMQVEEKPDVTYSDVGGCK.[E]	2xTMT6plex [K13; K25]; 1xTMT6plex [N-Term]; 1xDBIA [C24]	P35998	PRS7_C180	3725.94	117.2	87.1	142	97.6	80.4	75.7
[R].LCPNSTGAEIR.[S]	1xTMT6plex [N-Term]; 1xDBIA [C2]	P35998	PRS7_C377	1685.92	119.1	100.6	151.3	71.1	87.2	70.7
[R].SVCTEAGMFAIR.[A]	1xTMT6plex [N-Term]; 1xDBIA [C3]	P35998	PRS7_C389	1809.96	91	111.3	118.1	105.7	85.3	88.5
[K].LSCVPVLIFANK.[Q]	1xTMT6plex [K12]; 1xTMT6plex [N-Term]; 1xDBIA [C3]	P36405	ARL3_C118	2058.25	128	95.9	161.8	95.9	57.6	60.7
[K].LCDFGVSGQLIDSMANSFVGTR.[S]	1xOxidation [M14]; 1xTMT6plex [N-Term]; 1xDBIA [C2]	P36507	MP2K2_C211	2858.44	120.4	84.5	145.9	99.2	79.4	70.6
[K].LCDFGVSGQLIDSMANSFVGTR.[S]	1xTMT6plex [N-Term]; 1xDBIA [C2]	P36507	MP2K2_C211	2842.44	102.4	82.2	133.2	90.5	111.4	80.3
[R].SEVEEVDFAGWLCK.[T]	1xTMT6plex [K14]; 1xTMT6plex [N-Term]; 1xDBIA [C13]	P36507	MP2K2_C384	2366.25	125.4	99.5	143.2	99.5	71.5	60.9
[R].KEGGGGISCVLQDGCVFEK.[A]	1xCarbamidomethyl [C9]; 2xTMT6plex [K1; K19]; 1xTMT6plex [N-Term]; 1xDBIA [C15]	P36551	HEM6_C198	2966.6	113.3	80.5	132.7	97.7	99.9	75.9
[K].EGGGGISCVLQDGCVFEK.[A]	1xCarbamidomethyl [C8]; 1xTMT6plex [K18]; 1xTMT6plex [N-Term]; 1xDBIA [C14]	P36551	HEM6_C198	2609.35	110.1	81.1	127.7	90.2	117.5	73.4
[R].YAICSALAASALPALVMSK.[G]	1xTMT6plex [K19]; 1xTMT6plex [N-Term]; 1xDBIA [C4]	P36578	RL4_C125	2634.51	121.9	86.3	148.7	96.2	78.3	68.6
[R].RGPCIIYNEDNGIIK.[A]	1xTMT6plex [K15]; 1xTMT6plex [N-Term]; 1xDBIA [C4]	P36578	RL4_C208	2459.38	104.2	81.6	155.1	92.2	83.9	83
[R].GPCIIYNEDNGIIK.[A]	1xTMT6plex [K14]; 1xTMT6plex [N-Term]; 1xDBIA [C3]	P36578	RL4_C208	2303.28	101.5	80.4	151	86.3	109.3	71.5
[R].SGQGAFGNMCR.[G]	1xTMT6plex [N-Term]; 1xDBIA [C10]	P36578	RL4_C96	1652.82	127.1	89.6	167.5	93.6	55	67.2
[R].LVIGQNGILSTPAVSCIIR.[K]	1xTMT6plex [N-Term]; 1xDBIA [C16]	P36871	PGM1_C101	2479.46	113.1	96.8	105.7	85.7	100.8	97.9
[K].ICVNGDDAHPLWK.[W]	1xTMT6plex [K13]; 1xTMT6plex [N-Term]; 1xDBIA [C2]	P36969	GPX4_C134	2222.22	157.9	112.9	131	74.7	64.5	59.1
[R].YAECGLR.[I]	1xTMT6plex [N-Term]; 1xDBIA [C4]	P36969	GPX4_C93	1336.72	126	95.2	173	84	49.3	72.5
[K].DIIEHLNTSGAPADTSDPLQQICK.[I]	1xTMT6plex [K24]; 1xTMT6plex [N-Term]; 1xDBIA [C23]	P37198	NUP62_C475	3320.76	57.8	65.3	119.2	77.1	210	70.6
[K].CLGHPEEFYNLVR.[F]	1xTMT6plex [N-Term]; 1xDBIA [C1]	P37268	FDFT_C6	2102.11	237.2	167.4	44.1	44.9	55.7	50.8
[K].KENPVATNSCK.[S]	2xTMT6plex [K1; K11]; 1xTMT6plex [N-Term]; 1xDBIA [C10]	P37275	ZEB1_C503	2174.26	115.2	86.1	145	101.6	79.1	72.9
[K].DGTVLCELINALYPEGQAPVK.[K]	1xTMT6plex [K21]; 1xTMT6plex [N-Term]; 1xDBIA [C6]	P37802	TAGL2_C63	2984.65	77.4	91.8	145.5	103	107.6	74.7
[K].ALAGCDFLTISPK.[L]	1xTMT6plex [K13]; 1xTMT6plex [N-Term]; 1xDBIA [C5]	P37837	TALDO_C250	2090.21	118.6	92.4	153.1	95.5	69.7	70.7
[K].EVIAVSCGPAQCQETIR.[T]	1xCarbamidomethyl [C7]; 1xTMT6plex [N-Term]; 1xDBIA [C12]	P38117	ETFB_C71	2386.24	83.3	67.5	89	76.2	203.2	80.9
[K].AACEFSETDVTNTEHHQPSNNDLNTTEK.[R]	1xTMT6plex [K28]; 1xTMT6plex [N-Term]; 1xDBIA [C3]	P38398	BRCA1_C226	3886.86	97.6	85.9	125.6	74.9	131.1	84.9
[R].AFQLEEGEETEPDCK.[Y]	1xTMT6plex [K15]; 1xTMT6plex [N-Term]; 1xDBIA [C14]	P38432	COIL_C126	2479.24	92.3	80.8	105.9	76.8	171.3	72.9
[K].ATCGTVGDDNEEAK.[R]	1xTMT6plex [K14]; 1xTMT6plex [N-Term]; 1xDBIA [C3]	P38432	COIL_C170	2164.1	111.6	82.6	136.5	92.5	101.5	75.2
[K].WDFTPCK.[N]	1xTMT6plex [K7]; 1xTMT6plex [N-Term]; 1xDBIA [C6]	P38606	VATA_C138	1650.91	128.6	97.5	174.5	83.7	53.5	62.1
[R].VLDALFPCVQGGTTAIPGAFGCGK.[T]	1xCarbamidomethyl [C8]; 1xTMT6plex [K24]; 1xTMT6plex [N-Term]; 1xDBIA [C22]	P38606	VATA_C254	3133.69	126.1	94	143.2	98.4	71.8	66.4
[K].YSNSDVIIYVGCGER.[G]	1xTMT6plex [N-Term]; 1xDBIA [C12]	P38606	VATA_C277	2200.13	130.7	100.3	168.1	91.6	53.7	55.6
[K].CELSSSVQTDINLPYLTMDSSGPK.[H]	1xTMT6plex [K24]; 1xTMT6plex [N-Term]; 1xDBIA [C1]	P38646	GRP75_C317	3339.72	78.2	65.7	100	100.3	148.3	107.5
[K].CELSSSVQTDINLPYLTMDSSGPK.[H]	1xOxidation [M18]; 1xTMT6plex [K24]; 1xTMT6plex [N-Term]; 1xDBIA [C1]	P38646	GRP75_C317	3355.72	84.9	60.9	103.2	88.9	161.9	100.1
[R].RTIAPCQK.[A]	1xTMT6plex [K8]; 1xTMT6plex [N-Term]; 1xDBIA [C6]	P38646	GRP75_C366	1671.01	96.6	69.8	124.5	106.6	119	83.5
[K].MEEFKDQLPADECNK.[L]	2xTMT6plex [K5; K15]; 1xTMT6plex [N-Term]; 1xDBIA [C13]	P38646	GRP75_C608	2780.46	85.3	73.7	104.9	81.8	170.7	83.5
[K].TVFAEHISDECKR.[R]	1xTMT6plex [K12]; 1xTMT6plex [N-Term]; 1xDBIA [C11]	P39023	RL3_C114	2289.24	102	91.5	122.6	92.4	111.6	79.9
[K].TVFAEHISDECK.[R]	1xTMT6plex [K12]; 1xTMT6plex [N-Term]; 1xDBIA [C11]	P39023	RL3_C114	2133.14	101.2	89.1	120.1	94.4	118.6	76.6
[K].VACIGAWHPAR.[V]	1xTMT6plex [N-Term]; 1xDBIA [C3]	P39023	RL3_C253	1705.95	116.9	91.7	160.2	106.3	65.7	59.2
[K].GCVVGTK.[K]	1xTMT6plex [K7]; 1xTMT6plex [N-Term]; 1xDBIA [C2]	P39023	RL3_C336	1417.86	119.6	97.7	144.7	94.5	81.7	61.7
[K].GCVVGTKK.[R]	2xTMT6plex [K7; K8]; 1xTMT6plex [N-Term]; 1xDBIA [C2]	P39023	RL3_C336	1775.12	122.6	90	146.9	94.9	73.5	72
[K].CPNLTHLNLSGNK.[I]	1xTMT6plex [K13]; 1xTMT6plex [N-Term]; 1xDBIA [C1]	P39687	AN32A_C87	2165.23	131.2	94.7	162.3	94.2	56.7	60.7
[K].VYAAATEDMDCLTFGSPVLMR.[H]	1xTMT6plex [N-Term]; 1xDBIA [C11]	P39748	FEN1_C182	2815.4	127.3	84.1	103.4	99.5	107.5	78.1
[R].VTEAPCYPGAPSTEASGQTGPQEPTSAR.[A]	1xTMT6plex [N-Term]; 1xDBIA [C6]	P40222	TXLNA_C523	3314.62	118.5	93.3	131.7	105.3	77.1	74.2
[K].FICVTPTTCSNTIDLPMSPR.[T]	1xCarbamidomethyl [C3]; 1xTMT6plex [N-Term]; 1xDBIA [C9]	P40763	STAT3_C718	2778.42	119	101	137.8	108.2	69.9	64.1
[R].VGSDMTSQQEFTSCLK.[E]	1xTMT6plex [K16]; 1xTMT6plex [N-Term]; 1xDBIA [C14]	P40855	PEX19_C128	2515.29	60.7	97.4	146.3	99.4	137.1	59
[K].VIVVGNPANTNCLTASK.[S]	1xTMT6plex [K17]; 1xTMT6plex [N-Term]; 1xDBIA [C12]	P40925	MDHC_C137	2455.41	118	99.5	128.1	91.3	91.2	72
[K].AICDHVR.[D]	1xTMT6plex [N-Term]; 1xDBIA [C3]	P40925	MDHC_C251	1338.75	109.1	102.7	164	93.6	70.5	59.9
[K].SQETECTYFSTPLLLGK.[K]	1xTMT6plex [K17]; 1xTMT6plex [N-Term]; 1xDBIA [C6]	P40926	MDHM_C285	2671.44	87.9	86.3	115.3	103	134	73.5
[K].GYLGPEQLPDCLK.[G]	1xTMT6plex [K13]; 1xTMT6plex [N-Term]; 1xDBIA [C11]	P40926	MDHM_C89	2187.22	79.1	74.2	99.5	79.1	180.9	87.2
[K].YRPCSLGR.[L]	1xTMT6plex [N-Term]; 1xDBIA [C4]	P40938	RFC3_C11	1476.83	121.2	94.4	139.9	91.3	82.2	71.1
[R].SAVLISSKPGCFIAGADINMLAACK.[T]	1xCarbamidomethyl [C11]; 2xTMT6plex [K8; K25]; 1xTMT6plex [N-Term]; 1xDBIA [C24]	P40939	ECHA_C110	3520.97	127.7	104.6	126.7	85.1	91.3	64.7
[K].LDDPSCPRPECYR.[S]	1xCarbamidomethyl [C6]; 1xTMT6plex [N-Term]; 1xDBIA [C11]	P41091	IF2G_C101	2133.04	102.1	92.6	151.4	96.1	90.1	67.6
[R].SCGSSTPDEFPTDIPGTK.[G]	1xTMT6plex [K18]; 1xTMT6plex [N-Term]; 1xDBIA [C2]	P41091	IF2G_C105	2593.32	117.5	88.4	158.4	94.6	74.7	66.4
[K].IVLTNPVCTEVGEK.[I]	1xTMT6plex [K14]; 1xTMT6plex [N-Term]; 1xDBIA [C8]	P41091	IF2G_C434	2256.3	96.5	87	109.8	90.6	135.7	80.3
[R].LPALLDEQQVNVLLYDMNGCYSR.[L]	1xTMT6plex [N-Term]; 1xDBIA [C20]	P41134	ID1_C72	3179.64	108.6	102.7	207.1	94.9	41.5	45.2
[R].ICPIDITLAQR.[A]	1xTMT6plex [N-Term]; 1xDBIA [C2]	P41214	EIF2D_C489	1768.04	122	90.6	160.6	91.9	63	71.9
[K].GNSPPSSGEACR.[E]	1xTMT6plex [N-Term]; 1xDBIA [C11]	P41227	NAA10_C194	1686.84	100.6	91.1	169.3	87.3	77.6	74.1
[K].GNSPPSSGEACREEK.[G]	1xTMT6plex [K15]; 1xTMT6plex [N-Term]; 1xDBIA [C11]	P41227	NAA10_C194	2302.19	100.9	95.5	114.1	110.5	106.2	72.9
[R].AWIADVDEIQNGDHYPCLDDLEGLVAVGR.[D]	1xTMT6plex [N-Term]; 1xDBIA [C17]	P41229	KDM5C_C1047	3708.85	85	96.5	77.5	74.9	182.9	83.2
[K].YNFHGTAEQDLPFCK.[G]	1xTMT6plex [K15]; 1xTMT6plex [N-Term]; 1xDBIA [C14]	P41240	CSK_C31	2524.31	110	102.1	152	92.6	68.8	74.4
[R].SCYDLSCHAR.[A]	1xCarbamidomethyl [C2]; 1xTMT6plex [N-Term]; 1xDBIA [C7]	P41250	GARS_C471	1736.84	110.7	96.9	166.1	87.8	67.9	70.6
[K].DSLPVCPVDASGCFTTEVTDFAGQYVK.[D]	1xCarbamidomethyl [C13]; 1xTMT6plex [K27]; 1xTMT6plex [N-Term]; 1xDBIA [C6]	P41252	SYIC_C350	3660.83	91.5	77.9	107.3	85.4	154.1	83.7
[R].ISEVFDCWFESGSMPYAQVHYPFENK.[R]	1xTMT6plex [K26]; 1xTMT6plex [N-Term]; 1xDBIA [C7]	P41252	SYIC_C526	3864.88	111.3	93.1	151.8	93.9	71.2	78.8
[R].FGWDCHGLPVEYEIDK.[T]	1xTMT6plex [K16]; 1xTMT6plex [N-Term]; 1xDBIA [C5]	P41252	SYIC_C87	2662.37	113.5	84.6	157.4	98.2	79.5	66.8
[K].LGLQCLPSDGVQNVNQ.[-]	1xTMT6plex [N-Term]; 1xDBIA [C5]	P41440	S19A1_C580	2210.18	130.9	94.3	139.3	86.1	84.5	64.9
[K].NICQFLVEIGLAK.[D]	1xTMT6plex [K13]; 1xTMT6plex [N-Term]; 1xDBIA [C3]	P41567	EIF1_C94	2202.31	114.4	96.5	150.2	84	78.3	76.5
[R].GVILTSDRPGVFSAGLDLTEMCGR.[S]	1xTMT6plex [N-Term]; 1xDBIA [C22]	P42126	ECI1_C114	3019.59	97.2	86.7	129.4	82.2	126.2	78.4
[R].YCIGLNETQLGIIAPFWLK.[D]	1xTMT6plex [K19]; 1xTMT6plex [N-Term]; 1xDBIA [C2]	P42126	ECI1_C173	2933.67	114.9	67.4	135.1	79.8	131.8	70.9
[K].DIVENICGR.[E]	1xTMT6plex [N-Term]; 1xDBIA [C7]	P42166	LAP2A_C330	1543.85	128.1	90.7	168.5	95.1	58.7	58.8
[K].SGIQPLCPER.[S]	1xTMT6plex [N-Term]; 1xDBIA [C7]	P42166	LAP2A_C341	1624.9	114.8	93.6	133	91.2	90.4	77
[R].QLPSLACK.[Y]	1xTMT6plex [K8]; 1xTMT6plex [N-Term]; 1xDBIA [C7]	P42166	LAP2A_C518	1613.98	119.5	92.3	156.6	87.7	79.6	64.3
[K].VMCIEHEIK.[S]	1xTMT6plex [K9]; 1xTMT6plex [N-Term]; 1xDBIA [C3]	P42224	STAT1_C155	1856.05	121.1	104.4	138.6	98.4	70.2	67.2
[R].NLSFFLTPPCAR.[W]	1xTMT6plex [N-Term]; 1xDBIA [C10]	P42224	STAT1_C492	1891.05	115.9	97.5	158.1	87.1	75.4	66
[K].MVEEVFSNAIDCLSDEDK.[K]	1xTMT6plex [K18]; 1xTMT6plex [N-Term]; 1xDBIA [C12]	P42285	MTREX_C430	2798.4	72.1	64	80.7	76.5	221.9	84.9
[R].GGGGGGGGGGGCSGSGSSASR.[G]	1xTMT6plex [N-Term]; 1xDBIA [C12]	P42356	PI4KA_C19	2050.95	91.5	89.4	162.5	88.2	98.2	70.2
[R].SILPSNLLTVCQEGTLK.[R]	1xTMT6plex [K17]; 1xTMT6plex [N-Term]; 1xDBIA [C11]	P42356	PI4KA_C246	2570.5	105.1	88.6	112.6	98.2	120.9	74.6
[K].GSDPFASDCFFR.[Q]	1xTMT6plex [N-Term]; 1xDBIA [C9]	P42566	EPS15_C657	1873.91	119.8	92.2	156.5	97.6	72.4	61.4
[K].SFSSAPPLILTCSADK.[K]	1xTMT6plex [K16]; 1xTMT6plex [N-Term]; 1xDBIA [C12]	P42568	AF9_C320	2391.34	97.1	89.1	124.6	91.1	114.4	83.7
[R].GTELDCGIETDSGVDDDMACHK.[I]	1xCarbamidomethyl [C20]; 1xTMT6plex [K22]; 1xTMT6plex [N-Term]; 1xDBIA [C6]	P42574	CASP3_C170	3122.45	81.4	84.2	92.1	84.2	175	83.1
[R].LTEGCSFR.[R]	1xTMT6plex [N-Term]; 1xDBIA [C5]	P42677	RS27_C77	1437.77	141.5	111.1	162.5	87.3	58.9	38.7
[R].AVLCCMQLK.[G]	1xCarbamidomethyl [C4]; 1xTMT6plex [K9]; 1xTMT6plex [N-Term]; 1xDBIA [C5]	P42694	HELZ_C101	1820.04	120.7	102.2	165.1	93	57.1	61.9
[R].GVVPVVMDCESTVQEK.[A]	1xTMT6plex [K16]; 1xTMT6plex [N-Term]; 1xDBIA [C9]	P42695	CNDD3_C631	2474.34	90.4	91.3	113.1	80.7	150.2	74.4
[K].YIFTLGDIAQLCPAR.[V]	1xTMT6plex [N-Term]; 1xDBIA [C12]	P42695	CNDD3_C867	2206.23	122.9	96.5	143.6	85.3	85.3	66.4
[K].VFNDTCR.[S]	1xTMT6plex [N-Term]; 1xDBIA [C6]	P42704	LPPRC_C113	1379.73	97.7	83.4	141.8	91.6	107.8	77.7
[R].IHDVLCK.[L]	1xTMT6plex [K7]; 1xTMT6plex [N-Term]; 1xDBIA [C6]	P42704	LPPRC_C863	1581.96	98.2	78.6	127.7	92.8	117.4	85.3
[R].IVGYFVSGCDPSIMGIGPVPAISGALK.[K]	1xTMT6plex [K27]; 1xTMT6plex [N-Term]; 1xDBIA [C9]	P42765	THIM_C287	3402.89	96.6	80.3	124.7	98	113.9	86.5
[R].DEATEPGDQENKPCR.[I]	1xTMT6plex [K12]; 1xTMT6plex [N-Term]; 1xDBIA [C14]	P42858	HD_C664	2443.23	114.5	78.9	127.1	93.4	113.8	72.3
[R].GATAILCGTLICSILSR.[S]	1xCarbamidomethyl [C7]; 1xTMT6plex [N-Term]; 1xDBIA [C12]	P42858	HD_C777	2274.29	115.1	98	114.5	99.5	88.7	84.3
[R].CRDDSFFGETSHNYHK.[F]	1xTMT6plex [K16]; 1xTMT6plex [N-Term]; 1xDBIA [C1]	P43243	MATR3_C230	2697.32	95.9	86.4	155.5	88.1	97.6	76.5
[KR].TGFYCK.[L]	1xTMT6plex [K6]; 1xTMT6plex [N-Term]; 1xDBIA [C5]	P43243	MATR3_C803	1472.83	114	100.8	138.1	93.5	77.8	75.8
[K].GVCDQSFGIHVAELANFPK.[H]	1xTMT6plex [K19]; 1xTMT6plex [N-Term]; 1xDBIA [C3]	P43246	MSH2_C822	2786.51	95.4	100.1	158.4	87.3	86.2	72.5
[K].HVIECAK.[Q]	1xTMT6plex [K7]; 1xTMT6plex [N-Term]; 1xDBIA [C5]	P43246	MSH2_C843	1553.92	114.8	94.8	134.5	96.6	84.7	74.5
[R].EEEGPSTSCILESLFR.[A]	1xTMT6plex [N-Term]; 1xDBIA [C9]	P43355	MAGA1_C92	2322.18	126.6	101.1	159.6	90.6	71.3	50.9
[R].AWVWNTHADFADECPKPELLAIR.[F]	1xTMT6plex [K16]; 1xTMT6plex [N-Term]; 1xDBIA [C14]	P43487	RANG_C132	3436.82	104.7	94.3	103.3	80.2	137.5	80.1
[K].ICANHYITPMMELKPNAGSDR.[A]	1xTMT6plex [K14]; 1xTMT6plex [N-Term]; 1xDBIA [C2]	P43487	RANG_C99	3115.63	123.2	95.3	163.4	85.7	65.5	66.8
[K].DAFEHIVTQFSSVPVSVVSDSYDIYNACEK.[I]	1xTMT6plex [K30]; 1xTMT6plex [N-Term]; 1xDBIA [C28]	P43490	NAMPT_C287	4104.07	108.5	108.5	123.2	116.9	72.7	70.3
[R].GVLMYGPPGCGK.[T]	1xTMT6plex [K12]; 1xTMT6plex [N-Term]; 1xDBIA [C10]	P43686	PRS6B_C210	1933.08	101.1	76.5	142.5	89.9	105.5	84.6
[K].ALETCGGDLK.[Q]	1xTMT6plex [K10]; 1xTMT6plex [N-Term]; 1xDBIA [C5]	P43897	EFTS_C71	1761	95.7	87.4	110.8	91.9	131.9	82.3
[K].SCSGVEFSTSGSSNTDTGK.[V]	1xTMT6plex [K19]; 1xTMT6plex [N-Term]; 1xDBIA [C2]	P45880	VDAC2_C47	2605.28	125.7	88.1	167.4	86.6	79.4	52.8
[K].WCEYGLTFTEK.[W]	1xTMT6plex [K11]; 1xTMT6plex [N-Term]; 1xDBIA [C2]	P45880	VDAC2_C76	2131.13	135.9	85.2	174.9	77.4	73.8	52.9
[K].VGSFCLSEAGAGSDSFALK.[T]	1xTMT6plex [K19]; 1xTMT6plex [N-Term]; 1xDBIA [C5]	P45954	ACDSB_C175	2600.38	95.9	75.6	115.7	95	130.2	87.6
[K].IIGATDSCGDLMFLMK.[W]	1xTMT6plex [K16]; 1xTMT6plex [N-Term]; 1xDBIA [C8]	P45973	CBX5_C133	2469.33	103.7	82.3	128.5	84.6	120.9	80.1
[K].IIGATDSCGDLMFLMK.[W]	1xOxidation [M]; 1xTMT6plex [K16]; 1xTMT6plex [N-Term]; 1xDBIA [C8]	P45973	CBX5_C133	2485.33	95.8	75.3	133.9	95.7	117.6	81.7
[K].NLDCPELISEFMK.[K]	1xTMT6plex [K13]; 1xTMT6plex [N-Term]; 1xDBIA [C4]	P45973	CBX5_C59	2293.23	75.5	73	90	80.6	190	90.9
[R].AQVPFSSCLEAYGAPEQVDDFWSTALQAK.[S]	1xTMT6plex [K29]; 1xTMT6plex [N-Term]; 1xDBIA [C8]	P45974	UBP5_C532	3912.99	111.5	96.5	126	97.1	92	76.8
[K].VCASEKPPK.[D]	2xTMT6plex [K6; K9]; 1xTMT6plex [N-Term]; 1xDBIA [C2]	P45974	UBP5_C838	1942.18	115.9	93.6	120	110.1	78.8	81.6
[R].TACTNFMMTPYVVTR.[Y]	1xTMT6plex [N-Term]; 1xDBIA [C3]	P45984	MK09_C177	2260.15	100.1	89.4	163.6	104.2	68.9	73.9
[R].DAGCRPYMAPER.[I]	1xTMT6plex [N-Term]; 1xDBIA [C4]	P45985	MP2K4_C266	1890.95	104.8	94.1	154.7	101.1	70.4	75
[K].MPCQSLQPEPINTPTHTK.[Q]	1xOxidation [M1]; 1xTMT6plex [K18]; 1xTMT6plex [N-Term]; 1xDBIA [C3]	P46013	KI67_C1007	2792.48	97.1	77	130.9	93.4	116.2	85.5
[K].IPCDSPQSDPVDTPTSTK.[Q]	1xTMT6plex [K18]; 1xTMT6plex [N-Term]; 1xDBIA [C3]	P46013	KI67_C1251	2642.37	90.6	71.7	117.9	93.9	142.7	83.2
[R].KADVEGELLACR.[N]	1xTMT6plex [K1]; 1xTMT6plex [N-Term]; 1xDBIA [C11]	P46013	KI67_C1285	2058.18	116.5	96	129.5	95	83.2	79.9
[K].ADVEGELLACR.[N]	1xTMT6plex [N-Term]; 1xDBIA [C10]	P46013	KI67_C1285	1700.92	99.1	77.8	139.7	89.6	117.4	76.4
[R].ELFQTPCTDNPTTDEK.[T]	1xTMT6plex [K16]; 1xTMT6plex [N-Term]; 1xDBIA [C7]	P46013	KI67_C1843	2593.32	81.4	71.1	88.1	86.6	195.5	77.2
[K].ITEVSCK.[S]	1xTMT6plex [K7]; 1xTMT6plex [N-Term]; 1xDBIA [C6]	P46013	KI67_C1981	1533.91	99.9	72.7	138.1	87.5	118.9	82.9
[K].ELFQTPICTDKPTTHEK.[T]	2xTMT6plex [K11; K17]; 1xTMT6plex [N-Term]; 1xDBIA [C8]	P46013	KI67_C2206	2971.65	84.5	69.2	96.9	89.3	185.3	74.7
[K].IPCESPPLEVVDTTASTK.[R]	1xTMT6plex [K18]; 1xTMT6plex [N-Term]; 1xDBIA [C3]	P46013	KI67_C2706	2641.45	93.3	72.8	104.5	100	146.6	82.7
[K].GEAGNSDSMCLR.[S]	1xTMT6plex [N-Term]; 1xDBIA [C10]	P46013	KI67_C3199	1764.86	98	77.3	133	96	112.4	83.3
[R].SQHDILQMICSK.[R]	1xTMT6plex [K12]; 1xTMT6plex [N-Term]; 1xDBIA [C10]	P46013	KI67_C643	2157.19	79.1	84	144.3	88	122.2	82.3
[K].EQPQLTSTCHIAISNSENLLGK.[Q]	1xTMT6plex [K22]; 1xTMT6plex [N-Term]; 1xDBIA [C9]	P46013	KI67_C773	3137.7	92.5	93.6	114.5	99.1	126.3	74
[K].SEETNTEIVECILK.[R]	1xTMT6plex [K14]; 1xTMT6plex [N-Term]; 1xDBIA [C11]	P46013	KI67_C903	2362.29	95.4	77.3	112.3	92.6	141.8	80.5
[K].CAPMSDLTDLK.[S]	1xTMT6plex [K11]; 1xTMT6plex [N-Term]; 1xDBIA [C1]	P46013	KI67_C958	1948.06	115.1	77.4	146.2	88	95.7	77.6
[R].QVEVINFGDCLVR.[S]	1xTMT6plex [N-Term]; 1xDBIA [C10]	P46060	RAGP1_C274	2017.11	129	95.6	167.6	85.2	62.8	59.7
[K].ELNLSFCEIK.[R]	1xTMT6plex [K10]; 1xTMT6plex [N-Term]; 1xDBIA [C7]	P46060	RAGP1_C303	1950.11	122.2	103.1	146.9	89	76.7	62
[K].ALAPLLLAFVTKPNSALESCSFAR.[H]	1xTMT6plex [K12]; 1xTMT6plex [N-Term]; 1xDBIA [C20]	P46060	RAGP1_C573	3273.88	106.9	92.3	123.7	99.8	102.9	74.4
[R].AESSQTCHSEQGDK.[K]	1xTMT6plex [K14]; 1xTMT6plex [N-Term]; 1xDBIA [C7]	P46063	RECQ1_C606	2261.12	100	120.1	124.6	97	103.5	54.7
[R].AESSQTCHSEQGDKK.[M]	2xTMT6plex [K14; K15]; 1xTMT6plex [N-Term]; 1xDBIA [C7]	P46063	RECQ1_C606	2618.38	98.5	109.1	127.3	100.6	101.5	63
[R].VLLDAPCSGTGVISKDPAVK.[T]	2xTMT6plex [K15; K20]; 1xTMT6plex [N-Term]; 1xDBIA [C7]	P46087	NOP2_C463	2953.74	99.6	76	128.9	100.6	104.5	90.4
[R].VLLDAPCSGTGVISK.[D]	1xTMT6plex [K15]; 1xTMT6plex [N-Term]; 1xDBIA [C7]	P46087	NOP2_C463	2214.29	104.7	77.4	114.4	84.5	134.2	84.9
[R].CAHLQK.[E]	1xTMT6plex [K6]; 1xTMT6plex [N-Term]; 1xDBIA [C1]	P46087	NOP2_C487	1453.87	111.2	84.7	149	89.4	90	75.7
[K].GEKPCALEK.[K]	2xTMT6plex [K3; K9]; 1xTMT6plex [N-Term]; 1xDBIA [C5]	P46100	ATRX_C450	1958.17	90.8	83.2	123.3	99.4	123.1	80.2
[K].GADCQEVPQDKDGYK.[S]	2xTMT6plex [K11; K15]; 1xTMT6plex [N-Term]; 1xDBIA [C4]	P46100	ATRX_C605	2636.4	95.9	87.7	135.1	102	102.1	77.2
[R].CPTDELSLTNCAVVNEK.[D]	1xCarbamidomethyl [C11]; 1xTMT6plex [K17]; 1xTMT6plex [N-Term]; 1xDBIA [C1]	P46459	NSF_C11	2647.38	98.8	73.3	119.9	110.4	110.2	87.4
[R].VFPPEIVEQMGCK.[H]	1xTMT6plex [K13]; 1xTMT6plex [N-Term]; 1xDBIA [C12]	P46459	NSF_C250	2231.23	105.6	83.4	139	106.2	76.5	89.4
[K].GILLYGPPGCGK.[T]	1xTMT6plex [K12]; 1xTMT6plex [N-Term]; 1xDBIA [C10]	P46459	NSF_C264	1929.14	108.6	85.3	152	96.1	78.8	79.3
[R].FSPEFVDFTAQCLR.[K]	1xTMT6plex [N-Term]; 1xDBIA [C12]	P46734	MP2K3_C305	2185.13	121.7	87.8	117.1	118.6	85.3	69.6
[K].VCLESAVELPK.[I]	1xTMT6plex [K11]; 1xTMT6plex [N-Term]; 1xDBIA [C2]	P46736	BRCC3_C228	1942.14	117	97.5	153.4	99.2	65.8	67.1
[K].SVGGACVLVA.[-]	1xTMT6plex [N-Term]; 1xDBIA [C6]	P46776	RL27A_C144	1400.81	115.7	97.3	140.1	101.4	82.1	63.5
[R].NQSFCPTVNLDK.[L]	1xTMT6plex [K12]; 1xTMT6plex [N-Term]; 1xDBIA [C5]	P46776	RL27A_C70	2120.16	98.6	94.6	132.9	101.5	91.9	80.5
[R].NCSSFLIK.[R]	1xTMT6plex [K8]; 1xTMT6plex [N-Term]; 1xDBIA [C2]	P46779	RL28_C13	1665.98	118.7	86.3	162.2	92.1	69.3	71.5
[R].VNQAIWLLCTGAR.[E]	1xTMT6plex [N-Term]; 1xDBIA [C9]	P46782	RS5_C155	1970.12	119.7	91	141.2	90.1	93	65
[K].AQCPIVER.[L]	1xTMT6plex [N-Term]; 1xDBIA [C3]	P46782	RS5_C66	1440.82	111.6	114.5	94.8	73.6	149.2	56.3
[R].DAYCSEVK.[A]	1xTMT6plex [K8]; 1xTMT6plex [N-Term]; 1xDBIA [C4]	P46821	MAP1B_C1228	1668.9	116.9	96.4	163.6	85.3	65	72.7
[R].SIEEACFTLQYLNK.[L]	1xTMT6plex [K14]; 1xTMT6plex [N-Term]; 1xDBIA [C6]	P46821	MAP1B_C382	2413.32	127.5	108.8	164.6	92.5	50	56.6
[R].LCVLNAGWSR.[V]	1xTMT6plex [N-Term]; 1xDBIA [C2]	P46939	UTRN_C1627	1643.93	108.2	87.9	149.2	101.1	96.9	56.6
[K].LLIAQEPLYQCLVTTETFETGVPFSDLEK.[L]	1xTMT6plex [K29]; 1xTMT6plex [N-Term]; 1xDBIA [C11]	P46939	UTRN_C1759	4039.18	73.6	69.6	82	93.4	210.9	70.6
[K].ECIQEPSSVSQTR.[I]	1xTMT6plex [N-Term]; 1xDBIA [C2]	P46939	UTRN_C2185	1989.03	105.7	78.1	133.1	98.6	101	83.5
[R].SPDVGLYGVIPECGETYHSDLAEAK.[K]	1xTMT6plex [K25]; 1xTMT6plex [N-Term]; 1xDBIA [C13]	P46940	IQGA1_C660	3404.74	110.3	87.8	146.1	93.6	88.5	73.8
[K].KQIPAITCIQSQWR.[G]	1xTMT6plex [K1]; 1xTMT6plex [N-Term]; 1xDBIA [C8]	P46940	IQGA1_C781	2426.41	119.3	93.9	156.1	106.7	60.4	63.5
[K].EATDPRPCEVENAVESWR.[T]	1xTMT6plex [N-Term]; 1xDBIA [C8]	P47755	CAZA2_C111	2613.29	87.8	84.7	112.7	86.6	155.4	72.7
[K].GCWDSIHVVEVQEK.[S]	1xTMT6plex [K14]; 1xTMT6plex [N-Term]; 1xDBIA [C2]	P47756	CAPZB_C147	2383.28	88.6	71.8	172.5	91.9	102.7	72.6
[K].DETVSDCSPHIANIGR.[L]	1xTMT6plex [N-Term]; 1xDBIA [C7]	P47756	CAPZB_C206	2239.13	105.9	83.2	128.7	96.8	113.8	71.7
[K].AFIHWVSQPLMCEVR.[L]	1xTMT6plex [N-Term]; 1xDBIA [C12]	P47897	SYQ_C687	2341.25	106.8	97.6	150.8	88.6	84.2	72
[R].GEVPCTVTSASPLEEATLSELK.[T]	1xTMT6plex [K22]; 1xTMT6plex [N-Term]; 1xDBIA [C5]	P48047	ATPO_C141	3015.63	73.9	66	86.7	82.4	215	76
[K].ICDPYAWLEDPDSEQTK.[A]	1xTMT6plex [K17]; 1xTMT6plex [N-Term]; 1xDBIA [C2]	P48147	PPCE_C25	2764.39	117.3	94	160.2	96.1	63	69.5
[R].EGCDPVNR.[L]	1xTMT6plex [N-Term]; 1xDBIA [C3]	P48147	PPCE_C255	1414.73	134.1	100	161.9	89	58	56.9
[K].ITVPFLEQCPIR.[G]	1xTMT6plex [N-Term]; 1xDBIA [C9]	P48147	PPCE_C57	1941.12	128.3	105.9	143	94.4	64.4	64
[K].YTIGHAWTTDYGCSDSK.[Q]	1xTMT6plex [K17]; 1xTMT6plex [N-Term]; 1xDBIA [C13]	P48147	PPCE_C601	2659.32	108.2	94.8	153.3	95.3	80.6	67.8
[R].GSCDSGELGR.[N]	1xTMT6plex [N-Term]; 1xDBIA [C3]	P48200	IREB2_C178	1505.76	133.1	98.7	173.9	92.6	57.7	44.1
[R].GGPPCKPPAPEDEDEAWR.[Q]	1xTMT6plex [K6]; 1xTMT6plex [N-Term]; 1xDBIA [C5]	P48634	PRC2A_C437	2705.38	88.3	95.1	108	84.5	152.3	71.8
[K].VVNSCHR.[Q]	1xTMT6plex [N-Term]; 1xDBIA [C5]	P48643	TCPE_C181	1339.75	113.3	86.4	161.5	94	72.8	72
[K].IAILTCPFEPPKPK.[T]	2xTMT6plex [K12; K14]; 1xTMT6plex [N-Term]; 1xDBIA [C6]	P48643	TCPE_C253	2537.55	112.4	93	133.5	100.8	82.7	77.6
[K].ETGANLAICQWGFDDEANHLLLQNNLPAVR.[W]	1xTMT6plex [N-Term]; 1xDBIA [C9]	P48643	TCPE_C302	3847.98	121.6	80.9	133.9	105.1	92	66.5
[K].EMNPALGIDCLHK.[G]	1xTMT6plex [K13]; 1xTMT6plex [N-Term]; 1xDBIA [C10]	P48643	TCPE_C493	2195.21	111.9	99.7	124.1	97.8	96.4	70
[K].SSGGFVWACK.[N]	1xTMT6plex [K10]; 1xTMT6plex [N-Term]; 1xDBIA [C9]	P48735	IDHP_C308	1795.99	122.4	103.3	186	104.1	33.1	51.2
[K].DLAGCIHGLSNVK.[L]	1xTMT6plex [K13]; 1xTMT6plex [N-Term]; 1xDBIA [C5]	P48735	IDHP_C418	2081.19	117.1	103.2	159.2	101.4	67.5	51.6
[K].ELANSPDCPQMCAYK.[L]	1xCarbamidomethyl [C12]; 1xTMT6plex [K15]; 1xTMT6plex [N-Term]; 1xDBIA [C8]	P48739	PIPNB_C187	2481.23	108.7	93.3	115.4	86.6	121.1	74.9
[K].EGGGDSSASSPTEEEQEQGEIGACSDEGTAQEGK.[A]	1xTMT6plex [K34]; 1xTMT6plex [N-Term]; 1xDBIA [C24]	P49006	MRP_C134	4110.86	66	59.1	68	63	274.2	69.6
[R].EPLGVCVGIGAWNYPFQIASWK.[S]	1xTMT6plex [K22]; 1xTMT6plex [N-Term]; 1xDBIA [C6]	P49189	AL9A1_C150	3189.73	107.8	90.1	123.9	88.4	114.5	75.4
[K].GALMANFLTQGQVCCNGTR.[V]	1xCarbamidomethyl [C15]; 1xTMT6plex [N-Term]; 1xDBIA [C14]	P49189	AL9A1_C288	2566.29	109	99.6	134.8	94.7	85.5	76.4
[R].AYGGSMCAK.[C]	1xTMT6plex [K9]; 1xTMT6plex [N-Term]; 1xDBIA [C7]	P49207	RL34_C83	1641.89	122.8	91.5	153.9	94.7	66.6	70.4
[R].GGAGNTSTSCGDSNSICPAPSTMSK.[A]	1xCarbamidomethyl [C17]; 1xTMT6plex [K25]; 1xTMT6plex [N-Term]; 1xDBIA [C10]	P49247	RPIA_C62	3141.5	121.2	115.5	138.1	109.5	54.1	61.7
[K].SVSGTDVQEECREK.[G]	1xTMT6plex [K14]; 1xTMT6plex [N-Term]; 1xDBIA [C11]	P49321	NASP_C254	2321.22	97.8	81.1	125.1	98.7	108.7	88.6
[R].KPTDGASSSNCVTDISHLVR.[K]	1xTMT6plex [K1]; 1xTMT6plex [N-Term]; 1xDBIA [C11]	P49321	NASP_C708	2841.53	100.7	101.1	150.5	91.8	86.6	69.3
[R].HAQPTCPGAQLCTVYYASLNFR.[D]	1xCarbamidomethyl [C12]; 1xTMT6plex [N-Term]; 1xDBIA [C6]	P49327	FAS_C1558	3022.52	112.1	105.3	139.6	95.2	87.7	60.1
[R].CLATHGR.[F]	1xTMT6plex [N-Term]; 1xDBIA [C1]	P49327	FAS_C1759	1282.73	115.1	97.6	160.9	92.3	63.5	70.6
[K].CTVFHGAQVEDAFR.[Y]	1xTMT6plex [N-Term]; 1xDBIA [C1]	P49327	FAS_C1828	2105.08	129.1	93.3	158.2	95.4	60.9	63.2
[K].TFCPAHK.[S]	1xTMT6plex [K7]; 1xTMT6plex [N-Term]; 1xDBIA [C3]	P49327	FAS_C1881	1557.9	119.8	96.9	149.4	102.4	57.8	73.6
[R].DGLLENQTPEFFQDVCKPK.[Y]	2xTMT6plex [K17; K19]; 1xTMT6plex [N-Term]; 1xDBIA [C16]	P49327	FAS_C1992	3191.74	108	86.3	136.9	96.7	95.4	76.5
[R].EACPELDYFVVFSSVSCGR.[G]	1xCarbamidomethyl [C17]; 1xTMT6plex [N-Term]; 1xDBIA [C3]	P49327	FAS_C2010	2690.32	100.9	101.9	141.1	107.6	69.7	78.7
[R].LGMLSPEGTCK.[A]	1xTMT6plex [K11]; 1xTMT6plex [N-Term]; 1xDBIA [C10]	P49327	FAS_C212	1890.06	124.1	93	155.2	95.5	63	69.2
[R].LGMLSPEGTCK.[A]	1xOxidation [M3]; 1xTMT6plex [K11]; 1xTMT6plex [N-Term]; 1xDBIA [C10]	P49327	FAS_C212	1906.05	117.1	90.3	160.7	104.7	60.7	66.5
[K].ADEASELACPTPK.[E]	1xTMT6plex [K13]; 1xTMT6plex [N-Term]; 1xDBIA [C9]	P49327	FAS_C2202	2086.13	104.4	89.5	107.6	89.9	135.7	72.8
[K].AFDTAGNGYCR.[S]	1xTMT6plex [N-Term]; 1xDBIA [C10]	P49327	FAS_C223	1699.84	126.2	90.8	174.4	87.6	57.4	63.6
[K].LTPGCEAEAETEAICFFVQQFTDMEHNR.[V]	1xCarbamidomethyl [C15]; 1xTMT6plex [N-Term]; 1xDBIA [C5]	P49327	FAS_C2359	3798.78	115.3	105.8	84.8	110.1	117.2	66.8
[K].LTPGCEAEAETEAICFFVQQFTDMEHNR.[V]	1xCarbamidomethyl [C15]; 1xOxidation [M24]; 1xTMT6plex [N-Term]; 1xDBIA [C5]	P49327	FAS_C2359	3814.77	86.2	80.2	122.4	83.1	151.9	76.1
[R].GGPEVQQVPAGERPLWFICSGMGTQWR.[G]	1xTMT6plex [N-Term]; 1xDBIA [C19]	P49327	FAS_C496	3511.79	120.1	99.7	156.2	102.6	52.1	69.3
[R].GLKPSCTIIPLMK.[K]	2xTMT6plex [K3; K13]; 1xTMT6plex [N-Term]; 1xDBIA [C6]	P49327	FAS_C779	2384.47	117.2	103.9	127.4	94.2	82.5	74.7
[R].GLKPSCTIIPLMK.[K]	1xOxidation [M12]; 2xTMT6plex [K3; K13]; 1xTMT6plex [N-Term]; 1xDBIA [C6]	P49327	FAS_C779	2400.47	118.4	93.2	144.4	86.3	79.8	77.8
[R].ITSEQAMQDPYFLEDPLPTSDVFAGCQIPYPK.[R]	1xTMT6plex [K32]; 1xTMT6plex [N-Term]; 1xDBIA [C26]	P49336	CDK8_C349	4355.2	108.1	79.1	133.3	95.7	110.4	73.4
[R].WSSLACNIALDAVK.[M]	1xTMT6plex [K14]; 1xTMT6plex [N-Term]; 1xDBIA [C6]	P49368	TCPG_C173	2245.28	111.3	94.8	149	96.4	72.8	75.8
[K].IPGGIIEDSCVLR.[G]	1xTMT6plex [N-Term]; 1xDBIA [C10]	P49368	TCPG_C213	1897.08	119.9	93.6	121.5	102.3	88.8	73.9
[K].IGDEYFTFITDCKDPK.[A]	2xTMT6plex [K13; K16]; 1xTMT6plex [N-Term]; 1xDBIA [C12]	P49368	TCPG_C366	2875.55	109.6	88.7	116.1	93.6	119.9	72.1
[K].GEETPVIVGSALCALEGR.[D]	1xTMT6plex [N-Term]; 1xDBIA [C13]	P49411	EFTU_C222	2326.26	53.3	52.5	52.9	56.1	317.3	67.9
[K].KGDECELLGHSK.[N]	2xTMT6plex [K1; K12]; 1xTMT6plex [N-Term]; 1xDBIA [C5]	P49411	EFTU_C290	2299.3	72.4	56.5	93.7	71.7	223.7	82
[K].GDECELLGHSK.[N]	1xTMT6plex [K11]; 1xTMT6plex [N-Term]; 1xDBIA [C4]	P49411	EFTU_C290	1942.05	60.7	57	67.5	76.7	252.6	85.5
[R].STCTINYSK.[D]	1xTMT6plex [K9]; 1xTMT6plex [N-Term]; 1xDBIA [C3]	P49419	AL7A1_C522	1770.98	112.5	80	154	88.6	85.4	79.5
[R].GEVITTYCPANNEPIAR.[V]	1xTMT6plex [N-Term]; 1xDBIA [C8]	P49419	AL7A1_C70	2373.24	92.7	80	116.9	82.5	134.7	93.1
[K].VPTTLAEYCVK.[T]	1xTMT6plex [K11]; 1xTMT6plex [N-Term]; 1xDBIA [C9]	P49427	UB2R1_C191	1978.14	116.5	104	143.2	86.5	81	68.7
[K].EMQLGLEEGLVPSLSSSCVPDSSSLSSLGDSSFYR.[A]	1xTMT6plex [N-Term]; 1xDBIA [C18]	P49454	CENPF_C1480	4189.05	66.6	92.6	102.1	91.6	173.6	73.4
[K].GVEELESLCEVYR.[Q]	1xTMT6plex [N-Term]; 1xDBIA [C9]	P49454	CENPF_C1556	2051.07	92	86.8	152.3	103.4	91.3	74.1
[R].VAALHNDQEACK.[A]	1xTMT6plex [K12]; 1xTMT6plex [N-Term]; 1xDBIA [C11]	P49454	CENPF_C2464	2053.13	97.2	89.6	126.6	93.2	115	78.4
[K].EMLETQVAHLCSQQSK.[Q]	1xTMT6plex [K16]; 1xTMT6plex [N-Term]; 1xDBIA [C11]	P49454	CENPF_C2889	2586.38	72	81.6	100.5	98.3	165.5	82.1
[K].VTDDLVCLVYK.[T]	1xTMT6plex [K11]; 1xTMT6plex [N-Term]; 1xDBIA [C7]	P49458	SRP09_C48	2022.17	106.4	83	133.9	100.1	103.6	73
[K].AVYTQDCPLAAAK.[A]	1xTMT6plex [K13]; 1xTMT6plex [N-Term]; 1xDBIA [C7]	P49588	SYAC_C671	2105.18	124.6	98.6	123.5	97.5	85.1	70.6
[K].CLSVMEAK.[V]	1xTMT6plex [K8]; 1xTMT6plex [N-Term]; 1xDBIA [C1]	P49588	SYAC_C773	1634.94	132.6	98.3	174.1	89.1	48.7	57.2
[K].CLSVMEAK.[V]	1xOxidation [M5]; 1xTMT6plex [K8]; 1xTMT6plex [N-Term]; 1xDBIA [C1]	P49588	SYAC_C773	1650.93	121	91.4	151.7	98.2	63	74.8
[K].NVGCLQEALQLATSFAQLR.[L]	1xTMT6plex [N-Term]; 1xDBIA [C4]	P49588	SYAC_C947	2587.42	116.7	82	133.3	96.8	93	78.2
[R].VQPQWSPPAGTQPCR.[L]	1xTMT6plex [N-Term]; 1xDBIA [C14]	P49589	SYCC_C27	2177.15	132.6	79.5	158.3	97.3	65.2	67
[K].ASKPGEPSWPCPWGK.[G]	2xTMT6plex [K3; K15]; 1xTMT6plex [N-Term]; 1xDBIA [C11]	P49589	SYCC_C335	2610.45	118.7	98.1	174.9	87.5	57.9	62.9
[K].YAGLSTCFR.[Q]	1xTMT6plex [N-Term]; 1xDBIA [C7]	P49591	SYSC_C300	1542.83	121	86.2	153.2	85.7	71.6	82.4
[K].VEFVHMLNATMCATTR.[T]	1xTMT6plex [N-Term]; 1xDBIA [C12]	P49591	SYSC_C431	2349.21	124.9	88.3	111.1	94.6	105.2	75.9
[K].VDQFDPFTVPTISFICR.[E]	1xTMT6plex [N-Term]; 1xDBIA [C16]	P49642	PRI1_C354	2510.33	119.2	82.5	133.5	114.3	68.9	81.6
[K].IILSNPPSQGDYHGCPFR.[H]	1xTMT6plex [N-Term]; 1xDBIA [C15]	P49643	PRI2_C384	2526.31	123.5	106.1	143.7	84.5	71.9	70.3
[K].EGLAESEPMICHTLPLPEGFQVVK.[V]	1xOxidation [M9]; 1xTMT6plex [K24]; 1xTMT6plex [N-Term]; 1xDBIA [C11]	P49711	CTCF_C155	3394.82	81.2	75.7	85	92.8	185.1	80.3
[K].EGLAESEPMICHTLPLPEGFQVVK.[V]	1xTMT6plex [K24]; 1xTMT6plex [N-Term]; 1xDBIA [C11]	P49711	CTCF_C155	3378.82	69.9	60.9	72.7	79.6	240.9	76
[R].NLADCLR.[S]	1xTMT6plex [N-Term]; 1xDBIA [C5]	P49721	PSB2_C91	1329.75	109.5	95.4	167.4	91.2	64.1	72.4
[R].GDINVLLCGDPGTAK.[S]	1xTMT6plex [K15]; 1xTMT6plex [N-Term]; 1xDBIA [C8]	P49736	MCM2_C522	2227.25	100.5	94	124.3	86.2	119.6	75.4
[R].GVCLIDEFDK.[M]	1xTMT6plex [K10]; 1xTMT6plex [N-Term]; 1xDBIA [C3]	P49736	MCM2_C584	1893.06	105.2	93.3	140.7	89.8	98.3	72.7
[K].GFEVYLAEMSADNQTCGK.[R]	1xTMT6plex [K18]; 1xTMT6plex [N-Term]; 1xDBIA [C16]	P49750	YLPM1_C1967	2717.37	89.6	84.1	129.6	79.3	136.4	81.1
[K].ENDENCGPTTTVFVGNISEK.[A]	1xTMT6plex [K20]; 1xTMT6plex [N-Term]; 1xDBIA [C6]	P49756	RBM25_C83	2908.48	96.3	72	80.4	96.6	190.6	64
[K].FHVIVAECAPFCQGHEMAVNLSK.[A]	1xCarbamidomethyl [C8]; 1xTMT6plex [K23]; 1xTMT6plex [N-Term]; 1xDBIA [C12]	P49770	EI2BB_C198	3341.74	113.7	99.6	146.9	83.3	91.5	65
[R].CLAFHDISPQAPTHFLVIPK.[K]	1xTMT6plex [K20]; 1xTMT6plex [N-Term]; 1xDBIA [C1]	P49773	HINT1_C38	2988.69	107.1	94	167.4	88.9	69	73.7
[K].SASVAPFTCK.[T]	1xTMT6plex [K10]; 1xTMT6plex [N-Term]; 1xDBIA [C9]	P49790	NU153_C1065	1765.01	109.1	81.6	140.7	96.6	96.1	75.9
[K].CSTGYEK.[N]	1xTMT6plex [K7]; 1xTMT6plex [N-Term]; 1xDBIA [C1]	P49790	NU153_C404	1541.84	107.3	83.7	173.4	83.8	78.1	73.7
[K].AGSSWQCDTCLLQNK.[V]	1xCarbamidomethyl [C7]; 1xTMT6plex [K15]; 1xTMT6plex [N-Term]; 1xDBIA [C10]	P49790	NU153_C667	2465.27	100	71.7	137	105.3	104.3	81.7
[K].TGEEDEEEFFCNR.[A]	1xTMT6plex [N-Term]; 1xDBIA [C11]	P49792	RBP2_C1196	2129.96	107	74.7	140.3	90.9	110.9	76.1
[R].SSLEWNSCVVQTLK.[E]	1xTMT6plex [K14]; 1xTMT6plex [N-Term]; 1xDBIA [C8]	P49792	RBP2_C206	2348.3	119.3	97.3	156.5	87.5	75.2	64.2
[R].VWLWTACDFADGERK.[V]	1xTMT6plex [K15]; 1xTMT6plex [N-Term]; 1xDBIA [C7]	P49792	RBP2_C2407	2551.35	92.1	84.9	147.4	87.1	100.9	87.6
[R].VWLWTACDFADGER.[K]	1xTMT6plex [N-Term]; 1xDBIA [C7]	P49792	RBP2_C2407	2194.1	99	81.7	128.6	92.5	120.2	78
[K].LKLPPTFFCYK.[N]	2xTMT6plex [K2; K11]; 1xTMT6plex [N-Term]; 1xDBIA [C9]	P49792	RBP2_C2659	2340.41	99.3	78	125.7	102.7	106.6	87.7
[K].CRPLEENTADNEK.[E]	1xTMT6plex [K13]; 1xTMT6plex [N-Term]; 1xDBIA [C1]	P49792	RBP2_C2696	2273.2	125.1	70.9	121.5	93.5	108.6	80.4
[K].ECIIVWEK.[K]	1xTMT6plex [K8]; 1xTMT6plex [N-Term]; 1xDBIA [C2]	P49792	RBP2_C2710	1774.03	107.1	84.7	147.6	98.3	90.1	72.1
[K].ETNPVVFFDVCADGEPLGR.[I]	1xTMT6plex [N-Term]; 1xDBIA [C11]	P49792	RBP2_C3071	2590.32	100.9	73.6	108.6	90.3	145.4	81.3
[R].VIPDFVCQGGDITK.[H]	1xTMT6plex [K14]; 1xTMT6plex [N-Term]; 1xDBIA [C7]	P49792	RBP2_C3122	2246.26	102	81.2	130.9	98.5	108.7	78.8
[K].GEAGQNLLEMMACDR.[L]	1xTMT6plex [N-Term]; 1xDBIA [C13]	P49792	RBP2_C348	2163.06	102.4	87.8	145.1	82.7	112.2	69.7
[K].GEAGQNLLEMMACDR.[L]	1xOxidation [M]; 1xTMT6plex [N-Term]; 1xDBIA [C13]	P49792	RBP2_C348	2179.05	110.5	83	123.3	93.8	109.5	79.9
[K].MICQQVEAIK.[K]	1xTMT6plex [K10]; 1xTMT6plex [N-Term]; 1xDBIA [C3]	P49792	RBP2_C815	1917.11	111.8	90.7	149.6	101.7	69.8	76.4
[R].LPPQQHIYAYPQQMHTPPVQSSSACMFSQEMYGPPALR.[F]	1xTMT6plex [N-Term]; 1xDBIA [C25]	P49792	RBP2_C932	4841.37	89	105.2	154.6	90.1	87.4	73.6
[R].GAGAYICGEETALIESIEGK.[Q]	1xTMT6plex [K20]; 1xTMT6plex [N-Term]; 1xDBIA [C7]	P49821	NDUV1_C206	2765.48	81.6	78	113	91.4	141.3	94.9
[K].QIEGHTICALGDGAAWPVQGLIR.[H]	1xTMT6plex [N-Term]; 1xDBIA [C8]	P49821	NDUV1_C425	2930.59	95.6	82.5	116.2	102.5	125.7	77.6
[R].TTSFAESCKPVQQPSAFGSMK.[V]	2xTMT6plex [K9; K21]; 1xTMT6plex [N-Term]; 1xDBIA [C8]	P49841	GSK3B_C14	3214.72	121.9	91.5	130.8	104	77.3	74.6
[R].VPLDVCLK.[A]	1xTMT6plex [K8]; 1xTMT6plex [N-Term]; 1xDBIA [C6]	P49848	TAF6_C130	1641.02	103	87.8	142.9	94.7	103.8	67.7
[K].EITEACVGSCEAK.[R]	1xCarbamidomethyl [C6]; 1xTMT6plex [K13]; 1xTMT6plex [N-Term]; 1xDBIA [C10]	P49848	TAF6_C235	2151.12	92.1	80.2	111	97.8	137.7	81.2
[R].EDGVFNISVDNTCSLFR.[G]	1xTMT6plex [N-Term]; 1xDBIA [C13]	P49915	GUAA_C137	2441.23	131.6	80.7	152.1	90.9	68.9	75.8
[R].VICAEEPYICK.[D]	1xCarbamidomethyl [C3]; 1xTMT6plex [K11]; 1xTMT6plex [N-Term]; 1xDBIA [C10]	P49915	GUAA_C456	2079.14	123.3	93	151.3	97.7	66.7	68
[K].ACTTEEDQEK.[L]	1xTMT6plex [K10]; 1xTMT6plex [N-Term]; 1xDBIA [C2]	P49915	GUAA_C489	1907.98	117.6	86.7	163.3	93.7	69.8	68.8
[K].TVGVQGDCR.[S]	1xTMT6plex [N-Term]; 1xDBIA [C8]	P49915	GUAA_C523	1459.79	125.2	82.1	135.2	106	75.3	76.2
[K].AADETLCQTK.[V]	1xTMT6plex [K10]; 1xTMT6plex [N-Term]; 1xDBIA [C7]	P49916	DNLI3_C929	1834.01	90.5	83	123	91.1	137.2	75.1
[R].VICILSHPIK.[N]	1xTMT6plex [K10]; 1xTMT6plex [N-Term]; 1xDBIA [C3]	P50395	GDIB_C302	1877.18	115.7	91.7	165.5	92.2	67.4	67.5
[R].LLGHWEEAAHDLALACK.[FL]	1xTMT6plex [K17]; 1xTMT6plex [N-Term]; 1xDBIA [C16]	P50502	F10A1_C209	2631.45	115	87.9	144.4	93.1	76.9	82.7
[R].ELVEAECGGANPLMK.[L]	1xTMT6plex [K15]; 1xTMT6plex [N-Term]; 1xDBIA [C7]	P50542	PEX5_C11	2315.25	113.2	110.1	135.1	93.1	83.6	64.8
[K].LQDAFSSIGQSCHLDLPQIAVVGGQSAGK.[S]	1xTMT6plex [K29]; 1xTMT6plex [N-Term]; 1xDBIA [C12]	P50570	DYN2_C27	3680.98	108.9	90.4	132.7	101.3	92.7	74.1
[K].CVDLVIQELINTVR.[Q]	1xTMT6plex [N-Term]; 1xDBIA [C1]	P50570	DYN2_C427	2140.24	92.8	111.7	96.7	116.1	91.9	90.9
[K].TEHAEFLHCK.[S]	1xTMT6plex [K10]; 1xTMT6plex [N-Term]; 1xDBIA [C9]	P50570	DYN2_C86	1969.07	101.7	101.7	139.9	91.9	85.2	79.6
[K].GVVHDDMECSHYMK.[N]	1xTMT6plex [K14]; 1xTMT6plex [N-Term]; 1xDBIA [C9]	P50579	MAP2_C380	2405.18	104.1	104.5	131.1	95.2	92.3	72.9
[K].HLLNVINENFGTLAFCR.[R]	1xTMT6plex [N-Term]; 1xDBIA [C16]	P50579	MAP2_C416	2486.35	99.1	99.2	148.8	101.6	72.9	78.4
[K].GSYTAQFEHTILLRPTCK.[E]	1xTMT6plex [K18]; 1xTMT6plex [N-Term]; 1xDBIA [C17]	P50579	MAP2_C468	2819.56	105.1	99.2	134.6	108	79.7	73.3
[R].ALVDGPCTQVR.[R]	1xTMT6plex [N-Term]; 1xDBIA [C7]	P50914	RL14_C42	1683.94	107.4	90.6	143.7	90.6	98.1	69.6
[K].CMQLTDFILK.[F]	1xTMT6plex [K10]; 1xTMT6plex [N-Term]; 1xDBIA [C1]	P50914	RL14_C54	1966.13	120.3	91.9	157.2	86.7	75.9	68
[K].IAVYSCPFDGMITETK.[G]	1xTMT6plex [K16]; 1xTMT6plex [N-Term]; 1xDBIA [C6]	P50990	TCPQ_C244	2529.35	127.1	96.8	136.8	88	78.9	72.5
[K].IAVYSCPFDGMITETK.[G]	1xOxidation [M11]; 1xTMT6plex [K16]; 1xTMT6plex [N-Term]; 1xDBIA [C6]	P50990	TCPQ_C244	2545.34	106.2	100.6	149.9	99.8	76.9	66.7
[R].NIQACK.[E]	1xTMT6plex [K6]; 1xTMT6plex [N-Term]; 1xDBIA [C5]	P50990	TCPQ_C36	1430.86	111.1	98.8	147.1	103.2	76.8	63
[K].QITSYGETCPGLEQYAIK.[K]	1xTMT6plex [K18]; 1xTMT6plex [N-Term]; 1xDBIA [C9]	P50990	TCPQ_C430	2755.47	118.5	92.3	123.4	91	99.2	75.5
[K].AQDIEAGDGTTSVVIIAGSLLDSCTK.[L]	1xTMT6plex [K26]; 1xTMT6plex [N-Term]; 1xDBIA [C24]	P50991	TCPD_C120	3318.79	110.1	89.4	130.4	97.8	100.2	72.1
[K].LGGTIDDCELVEGLVLTQK.[V]	1xTMT6plex [K19]; 1xTMT6plex [N-Term]; 1xDBIA [C8]	P50991	TCPD_C221	2757.55	83.9	77	90.2	77.4	193.6	77.8
[K].IGLIQFCLSAPK.[T]	1xTMT6plex [K12]; 1xTMT6plex [N-Term]; 1xDBIA [C7]	P50991	TCPD_C252	2044.24	120.1	95.3	142.8	97.1	74.4	70.3
[K].TGCNVLLIQK.[S]	1xTMT6plex [K10]; 1xTMT6plex [N-Term]; 1xDBIA [C3]	P50991	TCPD_C295	1843.12	126.1	91.2	128.3	101.7	77.3	75.5
[K].GFGTDEQAIIDCLGSR.[S]	1xTMT6plex [N-Term]; 1xDBIA [C12]	P50995	ANX11_C226	2207.13	94.7	90.5	133.4	82.3	120.6	78.5
[K].GVGTDEACLIEILASR.[S]	1xTMT6plex [N-Term]; 1xDBIA [C8]	P50995	ANX11_C294	2172.19	86.2	121.4	86.7	70.2	163.2	72.2
[K].ETDCVLTQK.[L]	1xTMT6plex [K9]; 1xTMT6plex [N-Term]; 1xDBIA [C4]	P51003	PAPOA_C36	1791.01	119.4	98.4	139.3	99.2	77.3	66.5
[R].EACANENAHK.[D]	1xTMT6plex [K10]; 1xTMT6plex [N-Term]; 1xDBIA [C3]	P51114	FXR1_C141	1840.97	96.1	91.8	100.9	102.6	117.5	91.1
[K].HLECTK.[Q]	1xTMT6plex [K6]; 1xTMT6plex [N-Term]; 1xDBIA [C4]	P51114	FXR1_C211	1484.87	113.2	96.9	157	88.5	75.5	68.8
[R].EACSNENVHK.[E]	1xTMT6plex [K10]; 1xTMT6plex [N-Term]; 1xDBIA [C3]	P51116	FXR2_C151	1885	103.5	83.1	120.9	91.6	123.2	77.6
[R].KVPGVTAIELGEETCTFR.[I]	1xTMT6plex [K1]; 1xTMT6plex [N-Term]; 1xDBIA [C15]	P51116	FXR2_C270	2704.51	101	92.6	120.8	92.9	115.3	77.3
[K].IVCDGQYLHNFQCK.[H]	1xCarbamidomethyl [C13]; 1xTMT6plex [K14]; 1xTMT6plex [N-Term]; 1xDBIA [C3]	P51530	DNA2_C492	2479.3	118.1	96	146.5	92.6	73.1	73.7
[K].GIVEDIHCGSMK.[G]	1xTMT6plex [K12]; 1xTMT6plex [N-Term]; 1xDBIA [C8]	P51531	SMCA2_C91	2043.11	84.8	89.4	125	88.3	135.9	76.5
[R].QEVVVCMR.[R]	1xTMT6plex [N-Term]; 1xDBIA [C6]	P51532	SMCA4_C423	1488.82	106.1	82.9	134.7	83	114.1	79.3
[K].SCSTFEQWFNAPFAMTGEK.[V]	1xOxidation [M15]; 1xTMT6plex [K19]; 1xTMT6plex [N-Term]; 1xDBIA [C2]	P51532	SMCA4_C936	2951.45	87.2	90.3	160.3	89.3	100.6	72.4
[R].AQVCQQAEHSFAGMPCGIMDQFISLMGQK.[G]	1xCarbamidomethyl [C4]; 1xTMT6plex [K29]; 1xTMT6plex [N-Term]; 1xDBIA [C16]	P51570	GALK1_C182	3966.96	115.8	94.3	128.3	98.4	91.5	71.7
[K].CYADTMFSLLGK.[K]	1xTMT6plex [K12]; 1xTMT6plex [N-Term]; 1xDBIA [C1]	P51580	TPMT_C165	2103.14	134.1	90.8	156.3	90	65.4	63.4
[K].SWGIDCLFEK.[L]	1xTMT6plex [K10]; 1xTMT6plex [N-Term]; 1xDBIA [C6]	P51580	TPMT_C234	1952.07	123.5	95.2	144.3	102.1	67.5	67.5
[K].EVVPSLACEWSQLTLSGLNGAQMEK.[I]	1xTMT6plex [K25]; 1xTMT6plex [N-Term]; 1xDBIA [C8]	P51587	BRCA2_C393	3444.83	110.4	100.7	133.5	94.9	89	71.4
[R].GGSLESDGCPKEPAK.[T]	2xTMT6plex [K11; K15]; 1xTMT6plex [N-Term]; 1xDBIA [C9]	P51608	MECP2_C429	2458.36	85.2	86	107.8	88.3	146.8	86
[R].VAGINACGR.[G]	1xTMT6plex [N-Term]; 1xDBIA [C7]	P51610	HCFC1_C1872	1385.79	124.6	100.6	183.7	105	35.8	50.3
[K].TCLPGFPGAPCAIK.[I]	1xCarbamidomethyl [C11]; 1xTMT6plex [K14]; 1xTMT6plex [N-Term]; 1xDBIA [C2]	P51610	HCFC1_C1886	2186.22	113.8	93.6	124.2	101.7	83.1	83.7
[K].LVIYGGMSGCR.[L]	1xTMT6plex [N-Term]; 1xDBIA [C10]	P51610	HCFC1_C227	1680.91	119.7	89.5	160.5	89.5	76.5	64.2
[K].AWNNQVCCK.[D]	1xCarbamidomethyl [C7]; 1xTMT6plex [K9]; 1xTMT6plex [N-Term]; 1xDBIA [C8]	P51610	HCFC1_C353	1876.99	107.9	87.1	151.8	90.2	86.8	76.2
[K].VMDALEPADWCQFAALIVR.[D]	1xTMT6plex [N-Term]; 1xDBIA [C11]	P51617	IRAK1_C43	2673.41	139.7	98	146.6	95.4	61	59.3
[R].AAYEAFCR.[W]	1xTMT6plex [N-Term]; 1xDBIA [C7]	P51649	SSDH_C110	1455.76	86.5	92.3	159.5	79.4	123.7	58.7
[K].SNIHCNTIAPNAGSR.[M]	1xTMT6plex [N-Term]; 1xDBIA [C5]	P51659	DHB4_C189	2080.09	98.3	77.3	127.1	91.9	114.3	91
[K].FIYEGSSDFSCLPTFGVIIGQK.[S]	1xTMT6plex [K22]; 1xTMT6plex [N-Term]; 1xDBIA [C11]	P51659	DHB4_C373	3162.69	110.3	79	110.3	100.1	116.7	83.6
[K].RYCPNSVLVIIDVKPK.[D]	2xTMT6plex [K14; K16]; 1xTMT6plex [N-Term]; 1xDBIA [C3]	P51665	PSMD7_C116	2827.72	110.5	74.8	169.4	101	79	65.2
[R].VCFAQHTPSLPAESPRPLK.[L]	1xTMT6plex [K19]; 1xTMT6plex [N-Term]; 1xDBIA [C2]	P51790	CLCN3_C733	2832.6	108.1	88.3	145.7	98.4	75.5	84
[K].SCVEEPEPEPEAAEGDGDKK.[G]	2xTMT6plex [K19; K20]; 1xTMT6plex [N-Term]; 1xDBIA [C2]	P51858	HDGF_C108	3099.58	109.1	88.7	140.6	102.6	84.2	74.8
[K].KSCVEEPEPEPEAAEGDGDK.[K]	2xTMT6plex [K1; K20]; 1xTMT6plex [N-Term]; 1xDBIA [C3]	P51858	HDGF_C108	3099.58	108.3	94.4	123.3	104.1	99.6	70.2
[K].SCVEEPEPEPEAAEGDGDK.[K]	1xTMT6plex [K19]; 1xTMT6plex [N-Term]; 1xDBIA [C2]	P51858	HDGF_C108	2742.32	113.1	87.4	127.3	100.2	94.7	77.3
[R].TCLSQLLDIMK.[S]	1xTMT6plex [K11]; 1xTMT6plex [N-Term]; 1xDBIA [C2]	P51946	CCNH_C244	2019.17	109.3	100.5	104.9	103.5	88.1	93.8
[K].ESCEDVPVANPVSEFK.[L]	1xTMT6plex [K16]; 1xTMT6plex [N-Term]; 1xDBIA [C3]	P51957	NEK4_C724	2504.31	113.6	99.2	121.8	93.2	88.5	83.6
[K].ELADITLDPPPNCSAGPK.[G]	1xTMT6plex [K18]; 1xTMT6plex [N-Term]; 1xDBIA [C13]	P51965	UB2E1_C67	2592.41	97.8	94.8	120.8	84.1	126.1	76.4
[K].YHTINGHNCEVK.[K]	1xTMT6plex [K12]; 1xTMT6plex [N-Term]; 1xDBIA [C9]	P51991	ROA3_C196	2169.16	91.3	74.9	118.2	95.5	133	87.2
[R].GFGFVTYSCVEEVDAAMCARPHK.[V]	1xCarbamidomethyl [C18]; 1xTMT6plex [K23]; 1xTMT6plex [N-Term]; 1xDBIA [C9]	P51991	ROA3_C85	3328.67	81.5	91.5	129.8	90.2	123.3	83.7
[K].VGTGEPCCDWVGDEGAGHFVK.[M]	1xCarbamidomethyl [C7]; 1xTMT6plex [K21]; 1xTMT6plex [N-Term]; 1xDBIA [C8]	P52209	6PGD_C171	2974.46	127.9	88.3	123.8	98.9	91.1	69.9
[K].SAVENCQDSWR.[R]	1xTMT6plex [N-Term]; 1xDBIA [C6]	P52209	6PGD_C402	1819.9	132.9	102.2	126.2	87.9	81.7	69.1
[R].GCAVVEFK.[M]	1xTMT6plex [K8]; 1xTMT6plex [N-Term]; 1xDBIA [C2]	P52272	HNRPM_C114	1606.94	102.4	81.2	157.2	96.6	92.5	70.1
[K].DKFNECGHVLYADIK.[M]	2xTMT6plex [K2; K15]; 1xTMT6plex [N-Term]; 1xDBIA [C6]	P52272	HNRPM_C676	2735.52	113.7	80.9	151.8	96.2	85.3	72
[R].TDCSPIQFESAWALTNIASGTSEQTK.[A]	1xTMT6plex [K26]; 1xTMT6plex [N-Term]; 1xDBIA [C3]	P52292	IMA1_C133	3539.81	118.4	101.6	119.7	96.8	87.8	75.7
[K].YGAVDPLLALLAVPDMSSLACGYLR.[N]	1xOxidation [M16]; 1xTMT6plex [N-Term]; 1xDBIA [C21]	P52292	IMA1_C223	3149.69	108	98.5	129.8	91.8	92.6	79.3
[R].NITWTLSNLCR.[N]	1xTMT6plex [N-Term]; 1xDBIA [C10]	P52292	IMA1_C237	1846.02	125	83.1	154.3	95.9	72.8	68.9
[R].LLHHDDPEVLADTCWAISYLTDGPNER.[I]	1xTMT6plex [N-Term]; 1xDBIA [C14]	P52292	IMA1_C272	3605.79	90.5	99.5	136.3	96.8	98.5	78.3
[K].ENCTLQFESAWVLTNIASGNSLQTR.[I]	1xTMT6plex [N-Term]; 1xDBIA [C3]	P52294	IMA5_C141	3307.69	88.9	93.7	137.5	86.1	136.2	57.5
[K].TEDSLEGCLDCLLQALAQNNTETSEK.[I]	1xCarbamidomethyl [C8]; 1xTMT6plex [K26]; 1xTMT6plex [N-Term]; 1xDBIA [C11]	P52306	GDS1_C29	3636.81	96.8	88.1	75.9	86.7	171.3	81.3
[R].IPCVDAGLISPLVQLLNSK.[D]	1xTMT6plex [K19]; 1xTMT6plex [N-Term]; 1xDBIA [C3]	P52306	GDS1_C85	2734.63	111.9	97.8	147.8	96.9	76.7	68.8
[K].TIDAGCKPYMAPER.[I]	1xTMT6plex [K7]; 1xTMT6plex [N-Term]; 1xDBIA [C6]	P52564	MP2K6_C216	2306.24	117.6	92.9	138.4	97.9	72.3	80.9
[K].ACISIGNQNFEVK.[A]	1xTMT6plex [K13]; 1xTMT6plex [N-Term]; 1xDBIA [C2]	P52564	MP2K6_C38	2177.22	123.8	96.2	168.2	99.1	59.7	53
[R].GLPFGCTK.[E]	1xTMT6plex [K8]; 1xTMT6plex [N-Term]; 1xDBIA [C6]	P52597	HNRPF_C122	1576.93	102	84.1	145.5	86.6	102.1	79.8
[R].GLPWSCSVEDVQNFLSDCTIHDGAAGVHFIYTR.[E]	1xCarbamidomethyl [C18]; 1xTMT6plex [N-Term]; 1xDBIA [C6]	P52597	HNRPF_C22	4220.05	83.2	94	148.3	86.9	95.9	91.7
[R].DLSYCLSGMYDHR.[Y]	1xOxidation [M9]; 1xTMT6plex [N-Term]; 1xDBIA [C5]	P52597	HNRPF_C267	2101	96.4	89.3	167.4	103.3	82.4	61.3
[R].DLSYCLSGMYDHR.[Y]	1xTMT6plex [N-Term]; 1xDBIA [C5]	P52597	HNRPF_C267	2085.01	102.4	87.1	150.5	94.3	100.6	65.2
[R].HPCITK.[T]	1xTMT6plex [K6]; 1xTMT6plex [N-Term]; 1xDBIA [C3]	P52701	MSH6_C1098	1452.88	118.6	98.7	137.9	89.9	79.4	75.4
[K].AYCVLVTGPNMGGK.[S]	1xTMT6plex [K14]; 1xTMT6plex [N-Term]; 1xDBIA [C3]	P52701	MSH6_C1129	2164.2	113.9	81.8	168	96.1	66.1	74.2
[R].EVCLASER.[S]	1xTMT6plex [N-Term]; 1xDBIA [C3]	P52701	MSH6_C1337	1431.78	108.4	84.9	136.4	92.4	103.2	74.6
[R].SVAPAAPTSCDFSPGDLVWAK.[M]	1xTMT6plex [K21]; 1xTMT6plex [N-Term]; 1xDBIA [C10]	P52701	MSH6_C88	2873.53	112.5	91.9	132.6	99.6	89.4	74
[K].LNCFLEQDLK.[L]	1xTMT6plex [K10]; 1xTMT6plex [N-Term]; 1xDBIA [C3]	P52732	KIF11_C911	1977.12	133.5	98.1	174.1	97.5	44.3	52.6
[K].DVLILGGGDGGILCEIVK.[L]	1xTMT6plex [K18]; 1xTMT6plex [N-Term]; 1xDBIA [C14]	P52788	SPSY_C206	2525.48	107.8	78	141.9	92.5	106.6	73.2
[R].LYCPVEFSK.[E]	1xTMT6plex [K9]; 1xTMT6plex [N-Term]; 1xDBIA [C3]	P52788	SPSY_C337	1840.04	121.5	95.3	144.9	98.4	66.9	72.9
[K].KLPLGFTFSFPCHQTK.[L]	2xTMT6plex [K1; K16]; 1xTMT6plex [N-Term]; 1xDBIA [C12]	P52789	HXK2_C158	2834.64	98.4	90.8	151.2	87.9	95.4	76.2
[K].MLPTYVCATPDGTEK.[G]	1xTMT6plex [K15]; 1xTMT6plex [N-Term]; 1xDBIA [C7]	P52789	HXK2_C517	2380.27	99.2	71.8	98.1	88.8	159.3	82.8
[K].GVSLPLGFTFSFPCQQNSLDESILLK.[W]	1xTMT6plex [K26]; 1xTMT6plex [N-Term]; 1xDBIA [C14]	P52789	HXK2_C606	3594.96	75	77.1	91.8	80	180.8	95.4
[K].FLSQIESDCLALLQVR.[A]	1xTMT6plex [N-Term]; 1xDBIA [C9]	P52789	HXK2_C794	2360.32	87.1	80.5	99.9	82.7	167.7	82.1
[K].GAALITAVACR.[I]	1xTMT6plex [N-Term]; 1xDBIA [C10]	P52789	HXK2_C909	1570.93	96.5	76.5	132.6	95.5	115.6	83.3
[K].EENCAILK.[E]	1xTMT6plex [K8]; 1xTMT6plex [N-Term]; 1xDBIA [C4]	P52888	THOP1_C253	1673.97	118.1	71.3	143.7	97.5	91.3	78.1
[K].GLQVGGCEPEPQVC.[-]	1xCarbamidomethyl [C14]; 1xTMT6plex [N-Term]; 1xDBIA [C7]	P52888	THOP1_C682	1998	121.5	103.3	129.3	98.8	73.5	73.6
[K].FTSGAFLSPSVSVQECR.[T]	1xTMT6plex [N-Term]; 1xDBIA [C16]	P52948	NUP98_C1068	2340.22	113.8	73.1	140	98.1	103.7	71.2
[R].WLSCTATPQIEEEVSLTQK.[N]	1xTMT6plex [K19]; 1xTMT6plex [N-Term]; 1xDBIA [C4]	P52948	NUP98_C1312	2917.57	111	77.3	144.1	89.5	99.1	79
[R].DVCFHLLK.[L]	1xTMT6plex [K8]; 1xTMT6plex [N-Term]; 1xDBIA [C3]	P52948	NUP98_C1492	1729.02	104.1	81.7	148.5	90.4	94.5	80.8
[K].KELCALQK.[A]	2xTMT6plex [K1; K8]; 1xTMT6plex [N-Term]; 1xDBIA [C4]	P52952	NKX25_C114	1916.2	107.1	85.4	139.3	99.2	101.3	67.7
[K].MTVCLETEK.[K]	1xTMT6plex [K9]; 1xTMT6plex [N-Term]; 1xDBIA [C4]	P53004	BIEA_C204	1808.01	115.7	98.6	132.5	92	96.5	64.7
[R].GLLCGLGAGVAEAVVVVCPMETIK.[V]	1xCarbamidomethyl [C4]; 1xTMT6plex [K24]; 1xTMT6plex [N-Term]; 1xDBIA [C18]	P53007	TXTP_C141	3140.76	72.2	86.2	95.9	82.7	188.1	74.9
[K].TLCGTPNYIAPEVLSK.[K]	1xTMT6plex [K16]; 1xTMT6plex [N-Term]; 1xDBIA [C3]	P53350	PLK1_C212	2460.39	112.6	100.4	140.4	104.5	70.9	71.2
[R].LSLLEEYGCCK.[E]	1xCarbamidomethyl [C9]; 1xTMT6plex [K11]; 1xTMT6plex [N-Term]; 1xDBIA [C10]	P53350	PLK1_C573	2069.12	118	93.2	151	82.7	87.5	67.6
[R].GASCQGCPNQR.[L]	1xCarbamidomethyl [C7]; 1xTMT6plex [N-Term]; 1xDBIA [C4]	P53384	NUBP1_C22	1702.83	116.9	117	140.8	110.5	55.4	59.4
[K].LPIIGVVENMSGFICPK.[C]	1xTMT6plex [K17]; 1xTMT6plex [N-Term]; 1xDBIA [C15]	P53384	NUBP1_C235	2571.48	131.3	118.8	150.5	103.2	43.6	52.7
[K].VKLPIIGVVENMSGFICPK.[C]	2xTMT6plex [K2; K19]; 1xTMT6plex [N-Term]; 1xDBIA [C17]	P53384	NUBP1_C235	3027.81	134.4	109.6	147.1	109.8	40.6	58.6
[K].FICTTSAIQNR.[F]	1xTMT6plex [N-Term]; 1xDBIA [C3]	P53396	ACLY_C20	1778.98	119.1	93.8	177.6	88.4	62	59.2
[K].GVTIIGPATVGGIKPGCFK.[I]	2xTMT6plex [K14; K19]; 1xTMT6plex [N-Term]; 1xDBIA [C17]	P53396	ACLY_C633	2798.69	121.1	100.1	167.5	90.4	57.1	63.8
[R].KPASFMTSICDER.[G]	1xTMT6plex [K1]; 1xTMT6plex [N-Term]; 1xDBIA [C10]	P53396	ACLY_C845	2239.2	111	83.3	128.4	76.3	131.5	69.5
[R].VCETDGCSSEAK.[L]	1xCarbamidomethyl [C2]; 1xTMT6plex [K12]; 1xTMT6plex [N-Term]; 1xDBIA [C7]	P53582	MAP11_C14	2040.01	113	90.9	132.9	94.6	97	71.6
[R].SYCGHGIHK.[L]	1xTMT6plex [K9]; 1xTMT6plex [N-Term]; 1xDBIA [C3]	P53582	MAP11_C292	1755.97	109.8	104.5	148.5	79.6	82.5	75.2
[K].LGIQGSYFCSQECFK.[G]	1xCarbamidomethyl [C9]; 1xTMT6plex [K15]; 1xTMT6plex [N-Term]; 1xDBIA [C13]	P53582	MAP11_C40	2521.3	118.6	89.4	156.6	91.5	73.6	70.3
[K].YIIVTQVGPGPQILDDPCAHLLGPDGLPKPAA.[-]	1xTMT6plex [K29]; 1xTMT6plex [N-Term]; 1xDBIA [C18]	P53602	MVD1_C386	4020.24	97.5	97.6	127.8	98.9	102.5	75.7
[K].NEMNCK.[E]	1xTMT6plex [K6]; 1xTMT6plex [N-Term]; 1xDBIA [C5]	P53618	COPB_C684	1492.8	120	84.7	161.2	102.8	64.5	66.9
[K].NPTDAYQLNYDMHNPFDICAASYRPIYR.[G]	1xTMT6plex [N-Term]; 1xDBIA [C19]	P53621	COPA_C1169	3873.87	101	96.6	173.8	94.1	67.3	67.2
[K].CPLSGACYSPEFK.[G]	1xCarbamidomethyl [C7]; 1xTMT6plex [K13]; 1xTMT6plex [N-Term]; 1xDBIA [C1]	P53621	COPA_C1185	2213.15	120.2	103.1	143.6	103.3	59.4	70.3
[K].FPVFNMSYNPAENAVLLCTR.[A]	1xTMT6plex [N-Term]; 1xDBIA [C18]	P53621	COPA_C380	2811.45	99.9	106.5	153.4	88.9	91.3	60
[K].VQVPNCDEIFYAGTGNLLLR.[D]	1xTMT6plex [N-Term]; 1xDBIA [C6]	P53621	COPA_C453	2747.48	100.6	89.9	129.3	92.6	111.2	76.3
[K].LDALCNIHENIR.[V]	1xTMT6plex [N-Term]; 1xDBIA [C5]	P53621	COPA_C522	1936.06	97.1	88	142.3	89.2	103.5	79.9
[K].GNNVYCLDR.[E]	1xTMT6plex [N-Term]; 1xDBIA [C6]	P53621	COPA_C580	1578.83	110.2	89.9	173.1	102.5	62.7	61.6
[K].GTSPTQIWCNNSQLPVDHILAGSFETAMR.[L]	1xTMT6plex [N-Term]; 1xDBIA [C9]	P53621	COPA_C921	3698.86	108.6	99.1	140.7	87	86.2	78.3
[K].WEALHAAECPCGPSLIR.[F]	1xCarbamidomethyl [C9]; 1xTMT6plex [N-Term]; 1xDBIA [C11]	P53701	CCHL_C178	2435.25	111.2	82.9	116.6	86.9	124.9	77.6
[K].VIEQLGTPCPEFMK.[K]	1xTMT6plex [K14]; 1xTMT6plex [N-Term]; 1xDBIA [C9]	P53779	MK10_C283	2346.3	108	99.3	124.5	105.2	86.5	76.5
[K].SLSGGASYVDFLCHMHK.[E]	1xTMT6plex [K17]; 1xTMT6plex [N-Term]; 1xDBIA [C13]	P53992	SC24C_C1083	2606.36	101.6	99	165.8	89.8	81.6	62.2
[K].LLPVYLNCVLK.[S]	1xTMT6plex [K11]; 1xTMT6plex [N-Term]; 1xDBIA [C8]	P53992	SC24C_C910	2029.26	129	105.8	159.5	92.9	55.1	57.7
[K].SLMDLANDACQLLSGER.[Y]	1xTMT6plex [N-Term]; 1xDBIA [C10]	P54098	DPOG1_C471	2361.21	90.2	80.7	110.1	99	133.7	86.3
[R].SDCLGEHLYVMVNAK.[F]	1xTMT6plex [K15]; 1xTMT6plex [N-Term]; 1xDBIA [C3]	P54105	ICLN_C73	2433.3	123.1	103.3	156.7	93.2	62.5	61.2
[R].DRSDCLGEHLYVMVNAK.[F]	1xTMT6plex [K17]; 1xTMT6plex [N-Term]; 1xDBIA [C5]	P54105	ICLN_C73	2704.43	116.2	96.9	159.1	91.3	69.5	67.1
[K].GGSATCR.[K]	1xTMT6plex [N-Term]; 1xDBIA [C6]	P54132	BLM_C1364	1176.64	94.9	75.3	165.4	98.4	90.4	75.6
[K].LICDVSR.[Q]	1xTMT6plex [N-Term]; 1xDBIA [C3]	P54136	SYRC_C312	1330.77	113.8	115.1	102	111.1	77.1	80.9
[K].IVFVPGCSIPLTIVK.[S]	1xTMT6plex [K15]; 1xTMT6plex [N-Term]; 1xDBIA [C7]	P54136	SYRC_C369	2340.45	123.3	100.4	151.9	88.1	70.4	65.8
[R].MLLCEAVAAVMAK.[G]	1xTMT6plex [K13]; 1xTMT6plex [N-Term]; 1xDBIA [C4]	P54136	SYRC_C638	2104.21	123	90.5	125.8	93.9	92.1	74.6
[K].EAMCLSAPALALK.[L]	1xTMT6plex [K13]; 1xTMT6plex [N-Term]; 1xDBIA [C4]	P54198	HIRA_C673	2072.2	103.3	89.1	134.5	96	99.8	77.2
[K].AYCFNPSLSTWNLVSDK.[Q]	1xTMT6plex [K17]; 1xTMT6plex [N-Term]; 1xDBIA [C3]	P54198	HIRA_C846	2699.43	118.5	90.3	174.9	93.9	54.7	67.8
[K].AFCEPGNVENNGVLSFIK.[H]	1xTMT6plex [K18]; 1xTMT6plex [N-Term]; 1xDBIA [C3]	P54577	SYYC_C250	2692.45	114.9	91.6	163.3	94.7	66.4	69
[K].YEPFSFADDIGSNNCGYYDLQAVLTHQGR.[S]	1xTMT6plex [N-Term]; 1xDBIA [C15]	P54578	UBP14_C415	3805.81	112.5	93.7	148.1	83.9	80.2	81.6
[K].GGTGDCK.[M]	1xTMT6plex [K7]; 1xTMT6plex [N-Term]; 1xDBIA [C6]	P54687	BCAT1_C221	1391.77	115.9	107.7	180.6	99.2	47.2	49.4
[R].LAENFCVCHLATGDMLR.[A]	1xCarbamidomethyl [C6]; 1xTMT6plex [N-Term]; 1xDBIA [C8]	P54819	KAD2_C42	2475.25	98.5	90.4	125	94	112.6	79.6
[K].CEYPAACNALETLLIHR.[D]	1xCarbamidomethyl [C1]; 1xTMT6plex [N-Term]; 1xDBIA [C7]	P54886	P5CS_C612	2499.3	81.8	70.5	103.8	98.4	148.5	97
[K].SQICDNAALYAQK.[Y]	1xTMT6plex [K13]; 1xTMT6plex [N-Term]; 1xDBIA [C4]	P55060	XPO2_C272	2179.19	117.1	96	144.2	93.2	83.8	65.7
[K].NLFEDQNTLTSICEK.[V]	1xTMT6plex [K15]; 1xTMT6plex [N-Term]; 1xDBIA [C13]	P55060	XPO2_C344	2509.34	109.8	95.1	149.6	95.9	76.9	72.7
[K].ICAVGITK.[L]	1xTMT6plex [K8]; 1xTMT6plex [N-Term]; 1xDBIA [C2]	P55060	XPO2_C842	1558.98	133.6	107.2	169.3	87.1	45.2	57.5
[K].LLTECPPMMDTEYTK.[L]	1xTMT6plex [K15]; 1xTMT6plex [N-Term]; 1xDBIA [C5]	P55060	XPO2_C853	2526.31	108.4	77.2	118	104.3	122.7	69.4
[K].LSTACPGR.[V]	1xTMT6plex [N-Term]; 1xDBIA [C5]	P55060	XPO2_C939	1329.75	125.3	101.3	148.4	106.4	61.6	57
[K].REDEEESLNEVGYDDIGGCR.[K]	1xTMT6plex [N-Term]; 1xDBIA [C19]	P55072	TERA_C209	2810.31	102.4	85.1	140.7	98.4	95.6	77.8
[K].GVLFYGPPGCGK.[T]	1xTMT6plex [K12]; 1xTMT6plex [N-Term]; 1xDBIA [C10]	P55072	TERA_C522	1949.11	114.2	86.4	149.8	90.1	84.6	74.8
[R].QAAPCVLFFDELDSIAK.[A]	1xTMT6plex [K17]; 1xTMT6plex [N-Term]; 1xDBIA [C5]	P55072	TERA_C572	2621.44	117.5	84.6	133.1	98.6	92.1	74.1
[K].FNNWGGSLSLGHPFGATGCR.[L]	1xTMT6plex [N-Term]; 1xDBIA [C19]	P55084	ECHB_C435	2603.31	100.6	93.4	120.9	112.6	86.2	86.4
[K].EGGQYGLVAACAAGGQGHAMIVEAYPK.[-]	1xTMT6plex [K27]; 1xTMT6plex [N-Term]; 1xDBIA [C11]	P55084	ECHB_C458	3402.77	84	69.1	108	101.5	156	81.3
[R].LLEPEAPGLCRPPLPR.[D]	1xTMT6plex [N-Term]; 1xDBIA [C10]	P55196	AFAD_C1684	2283.32	83.4	92.1	126.4	95.3	119	83.8
[K].FVAYNEEEEEEDCSLAGPNSYPGSTGAAVGAHDACR.[D]	1xCarbamidomethyl [C13]; 1xTMT6plex [N-Term]; 1xDBIA [C35]	P55196	AFAD_C1764	4327.93	115.6	99.6	140.7	108.1	61.1	75
[K].EIILDDDECPLQIFR.[E]	1xTMT6plex [N-Term]; 1xDBIA [C9]	P55196	AFAD_C324	2344.24	119	69.3	95.9	106.1	125.2	84.6
[R].EVQLEEDPDLQLPFLLPEDGYSCDVVR.[N]	1xTMT6plex [N-Term]; 1xDBIA [C23]	P55196	AFAD_C942	3643.84	123.6	94.5	144.1	94	80	63.8
[R].NIPNGLQEFLDPLCQR.[G]	1xTMT6plex [N-Term]; 1xDBIA [C14]	P55196	AFAD_C960	2382.28	115.4	92.6	158.8	88	77	68.1
[R].DCEHGEAAAPAPTVR.[L]	1xTMT6plex [N-Term]; 1xDBIA [C2]	P55199	ELL_C411	2049.04	98.8	84.7	137.7	94.8	107.9	76.2
[R].SEPDDSDPFSFDGPEIMGCTGCQIDWK.[K]	1xCarbamidomethyl [C19]; 1xTMT6plex [K27]; 1xTMT6plex [N-Term]; 1xDBIA [C22]	P55209	NP1L1_C258	3787.73	129.5	90.4	131.7	89.7	88.8	69.9
[K].KQIPCVVSMLTK.[E]	2xTMT6plex [K1; K12]; 1xTMT6plex [N-Term]; 1xDBIA [C5]	P55210	CASP7_C290	2330.43	110.8	107.5	138.1	101.1	73.3	69.3
[K].QIPCVVSMLTK.[E]	1xTMT6plex [K11]; 1xTMT6plex [N-Term]; 1xDBIA [C4]	P55210	CASP7_C290	1973.17	121.1	97.3	131.9	93.3	78.2	78.2
[K].LFFIQACGGEQK.[D]	1xTMT6plex [K12]; 1xTMT6plex [N-Term]; 1xDBIA [C7]	P55211	CASP9_C287	2095.18	112.4	102.8	168.2	94.4	57.9	64.2
[R].TGCTFPEKPDFH.[-]	1xTMT6plex [K8]; 1xTMT6plex [N-Term]; 1xDBIA [C3]	P55263	ADK_C353	2133.12	109.3	94	136.4	101.5	76.6	82.3
[R].GVDCLSSHFQELSIYQDQEQR.[I]	1xTMT6plex [N-Term]; 1xDBIA [C4]	P55265	DSRAD_C125	3007.48	87.1	100.7	141.4	89.2	115.2	66.4
[K].ICDYLFNVSDSSALNLAK.[N]	1xTMT6plex [K18]; 1xTMT6plex [N-Term]; 1xDBIA [C2]	P55265	DSRAD_C304	2727.48	95.8	79.1	153.3	82.4	108.2	81.2
[R].NAEFLTCNIPTSNASNNMVTTEK.[V]	1xTMT6plex [K23]; 1xTMT6plex [N-Term]; 1xDBIA [C7]	P55265	DSRAD_C392	3253.66	93.2	79.6	111.6	84.6	146	85.1
[K].SPVTTLLECMHK.[L]	1xTMT6plex [K12]; 1xTMT6plex [N-Term]; 1xDBIA [C9]	P55265	DSRAD_C622	2113.19	94	90.3	106.1	90.5	134	85.1
[K].LGNSCEFR.[L]	1xTMT6plex [N-Term]; 1xDBIA [C5]	P55265	DSRAD_C630	1450.77	100.6	86.8	174.5	86.3	79.6	72.2
[K].FQYCVAVGAQTFPSVSAPSKK.[V]	2xTMT6plex [K20; K21]; 1xTMT6plex [N-Term]; 1xDBIA [C4]	P55265	DSRAD_C649	3198.8	115.4	78	134	92.4	88	92.2
[K].FQYCVAVGAQTFPSVSAPSK.[K]	1xTMT6plex [K20]; 1xTMT6plex [N-Term]; 1xDBIA [C4]	P55265	DSRAD_C649	2841.54	110.2	84.8	131.2	91.6	106.2	76
[K].GETVNDCHAEIISR.[R]	1xTMT6plex [N-Term]; 1xDBIA [C7]	P55265	DSRAD_C909	2069.06	107.7	87.7	142.7	92.1	92.3	77.5
[R].ILQPMLDSSCSETPK.[T]	1xTMT6plex [K15]; 1xTMT6plex [N-Term]; 1xDBIA [C10]	P55347	PKNX1_C326	2403.3	104.8	75.4	124.1	95	126.4	74.3
[R].FASGGCDNLIK.[L]	1xTMT6plex [K11]; 1xTMT6plex [N-Term]; 1xDBIA [C6]	P55735	SEC13_C187	1879.05	121.4	94.9	158.4	89.9	69.5	65.8
[R].DVAWAPSIGLPTSTIASCSQDGR.[V]	1xTMT6plex [N-Term]; 1xDBIA [C18]	P55735	SEC13_C234	2857.47	99.7	89.4	140.8	95.1	106.4	68.6
[K].KLLDLVQQSCNYK.[Q]	2xTMT6plex [K1; K13]; 1xTMT6plex [N-Term]; 1xDBIA [C10]	P55769	NH2L1_C30	2535.49	109.8	89.4	163.8	92	73.3	71.7
[R].AFPCWDEPAIK.[A]	1xTMT6plex [K11]; 1xTMT6plex [N-Term]; 1xDBIA [C4]	P55786	PSA_C190	2031.11	119	107	157.5	88.7	63.9	63.9
[R].LPADVSPINYSLCLKPDLLDFTFEGK.[L]	2xTMT6plex [K15; K26]; 1xTMT6plex [N-Term]; 1xDBIA [C13]	P55786	PSA_C66	3879.16	91.7	93.4	115.9	84.9	144.5	69.6
[R].GLPWSCSADEVMR.[F]	1xTMT6plex [N-Term]; 1xDBIA [C6]	P55795	HNRH2_C22	1975.99	103.4	80.9	129.4	98	112.5	75.8
[R].GFHCESSAHWPIFK.[W]	1xTMT6plex [K14]; 1xTMT6plex [N-Term]; 1xDBIA [C4]	P55884	EIF3B_C420	2400.27	86.6	113.7	137.3	82.3	102.1	77.9
[K].RSEKPPAGSICR.[A]	1xTMT6plex [K4]; 1xTMT6plex [N-Term]; 1xDBIA [C11]	P56182	RRP1_C274	2055.19	96.6	73.5	142.9	109.7	99.6	77.8
[R].LFVSDGVPGCLPVLAAAGR.[A]	1xTMT6plex [N-Term]; 1xDBIA [C10]	P56192	SYMC_C12	2367.34	112.2	87.9	142.7	94	79.4	83.8
[K].ALEEGLTPQEICDK.[Y]	1xTMT6plex [K14]; 1xTMT6plex [N-Term]; 1xDBIA [C12]	P56192	SYMC_C333	2300.26	90.1	82.5	100.6	76.2	161.4	89.3
[R].SCPVVQSSQHLFLDLPK.[L]	1xTMT6plex [K17]; 1xTMT6plex [N-Term]; 1xDBIA [C2]	P56192	SYMC_C441	2652.49	101.1	95.8	156	97.2	80.5	69.3
[K].QACEIQK.[C]	1xTMT6plex [K7]; 1xTMT6plex [N-Term]; 1xDBIA [C3]	P56277	CMC4_C12	1573.91	93.9	82.8	155.6	97.9	99	70.7
[K].AAGELGIAVCNIPSAAVEETADSTICHILNLYR.[R]	1xCarbamidomethyl [C10]; 1xTMT6plex [N-Term]; 1xDBIA [C26]	P56545	CTBP2_C140	3997.07	76.8	73.4	103.4	82.5	186.8	77.1
[K].DLATVAFCDAQSTQEIHEK.[V]	1xTMT6plex [K19]; 1xTMT6plex [N-Term]; 1xDBIA [C8]	P56545	CTBP2_C60	2860.49	92.5	81.2	111.4	91.1	143.9	79.9
[K].DGSKPLLCHYMMPDEETPLAVQACGLSPR.[D]	1xCarbamidomethyl [C8]; 1xTMT6plex [K4]; 1xTMT6plex [N-Term]; 1xDBIA [C24]	P56589	PEX3_C251	3970.01	95.8	75.1	113.3	102.1	129.5	84
[K].SGDVYSFSVLEPHGCGR.[L]	1xTMT6plex [N-Term]; 1xDBIA [C15]	P57081	WDR4_C137	2335.17	104.1	93.6	143.9	102.3	82.6	73.5
[R].IVVEHIIMKPACPLFVR.[R]	1xTMT6plex [K9]; 1xTMT6plex [N-Term]; 1xDBIA [C12]	P57088	TMM33_C224	2719.63	96	74.9	118.7	80.7	155.4	74.2
[R].SDPDACPTMPLLAMLLR.[G]	1xTMT6plex [N-Term]; 1xDBIA [C6]	P57678	GEMI4_C210	2369.26	109.6	98.2	133.8	108.2	88.8	61.4
[K].LPSETIFVGCEFLHHLLR.[E]	1xTMT6plex [N-Term]; 1xDBIA [C10]	P57678	GEMI4_C317	2636.46	136.8	105.2	126.6	81.7	79.5	70.2
[R].LCDSLTSFSQNATLYLNR.[T]	1xTMT6plex [N-Term]; 1xDBIA [C2]	P57678	GEMI4_C349	2571.34	132.3	100.8	155.9	90.5	62.6	57.8
[R].AGTAPSCR.[N]	1xTMT6plex [N-Term]; 1xDBIA [C7]	P57737	CORO7_C34	1287.7	126.4	89.7	165.8	99	52.7	66.3
[K].GLNLTTPGESDGFCANK.[L]	1xTMT6plex [K17]; 1xTMT6plex [N-Term]; 1xDBIA [C14]	P57737	CORO7_C505	2478.31	106.4	96.6	123.3	103.6	87.3	82.9
[R].QPDISCILGTGGK.[S]	1xTMT6plex [K13]; 1xTMT6plex [N-Term]; 1xDBIA [C6]	P57740	NU107_C78	2043.17	102.4	87.6	146.1	98	88.4	77.5
[R].GITLDLGFSCFSVPLPAR.[L]	1xTMT6plex [N-Term]; 1xDBIA [C10]	P57772	SELB_C55	2418.34	103.9	95.5	174.4	89.4	67	69.7
[R].VCISILHAPGDDPMGYESSAER.[W]	1xTMT6plex [N-Term]; 1xDBIA [C2]	P60604	UB2G2_C89	2872.42	74.8	69.3	140.7	90.2	144.4	80.6
[K].LCYVALDFEQEMATAASSSSLEK.[S]	1xTMT6plex [K23]; 1xTMT6plex [N-Term]; 1xDBIA [C2]	P60709	ACTB_C217	3247.66	101.8	80.1	132.4	90.5	115.3	79.9
[R].FRCPEALFQPSFLGMESCGIHETTFNSIMK.[C]	1xCarbamidomethyl [C3]; 1xTMT6plex [K30]; 1xTMT6plex [N-Term]; 1xDBIA [C18]	P60709	ACTB_C272	4232.12	99.5	98.9	156.2	96.8	69.9	78.6
[K].VVMALGDYMGASCHACIGGTNVR.[A]	1xCarbamidomethyl [C13]; 1xTMT6plex [N-Term]; 1xDBIA [C16]	P60842	IF4A1_C134	2907.43	103.2	96.1	149.2	93.9	85.7	72
[K].TPCGEGSK.[T]	1xTMT6plex [K8]; 1xTMT6plex [N-Term]; 1xDBIA [C3]	P60866	RS20_C70	1532.85	106.2	95.5	115.9	83.9	134.2	64.3
[R].VAILVDDMADTCGTICHAADK.[L]	1xCarbamidomethyl [C12]; 1xTMT6plex [K21]; 1xTMT6plex [N-Term]; 1xDBIA [C16]	P60891	PRPS1_C230	2973.52	103.7	88.7	122.8	96.2	123.8	64.8
[R].VTAVIPCFPYAR.[Q]	1xTMT6plex [N-Term]; 1xDBIA [C7]	P60891	PRPS1_C91	1862.06	118.8	88.2	154.8	96.1	76.9	65.2
[K].YVECSALTQK.[G]	1xTMT6plex [K10]; 1xTMT6plex [N-Term]; 1xDBIA [C4]	P60953	CDC42_C157	1896.07	105.3	83	133.3	91	98.1	89.2
[K].LGGSLIVAFEGCPV.[-]	1xTMT6plex [N-Term]; 1xDBIA [C12]	P60981	DEST_C163	1887.06	126.7	93.6	157.4	94.7	59.8	67.9
[K].CSTPEEIKK.[R]	2xTMT6plex [K8; K9]; 1xTMT6plex [N-Term]; 1xDBIA [C1]	P60981	DEST_C23	2018.19	132.4	98.9	139.4	90.4	64.2	74.7
[KR].IYHPNINSNGSICLDILR.[S]	1xTMT6plex [N-Term]; 1xDBIA [C13]	P61077	UB2D3_C85	2567.4	107.7	95.8	141.4	96.7	88.2	70.3
[K].TCDISFSDPDDLLNFK.[L]	1xTMT6plex [K16]; 1xTMT6plex [N-Term]; 1xDBIA [C2]	P61081	UBC12_C47	2584.34	113.9	94.6	131.2	113.7	73.8	72.9
[K].LVICPDEGFYK.[S]	1xTMT6plex [K11]; 1xTMT6plex [N-Term]; 1xDBIA [C4]	P61081	UBC12_C65	2038.14	115.9	101.4	151.3	92	70.5	69
[R].ICLDILK.[D]	1xTMT6plex [K7]; 1xTMT6plex [N-Term]; 1xDBIA [C2]	P61088	UBE2N_C87	1572	125.4	100.7	140.7	91.2	76.7	65.3
[K].FMADCPHTIGVEFGTR.[I]	1xTMT6plex [N-Term]; 1xDBIA [C5]	P61106	RAB14_C40	2306.16	107.8	93.4	113.8	83.8	110.9	90.3
[R].YSYVCPDLVK.[E]	1xTMT6plex [K10]; 1xTMT6plex [N-Term]; 1xDBIA [C5]	P61158	ARP3_C235	1941.09	121.7	100.4	149.6	89.8	67.9	70.6
[K].KDYEEIGPSICR.[H]	1xTMT6plex [K1]; 1xTMT6plex [N-Term]; 1xDBIA [C11]	P61158	ARP3_C408	2164.18	117.1	93.4	160.7	103	67.3	58.5
[R].LPACVVDCGTGYTK.[L]	1xCarbamidomethyl [C8]; 1xTMT6plex [K14]; 1xTMT6plex [N-Term]; 1xDBIA [C4]	P61158	ARP3_C8	2238.2	121.2	96.2	144.7	100.1	69.5	68.3
[K].VVVCDNGTGFVK.[C]	1xTMT6plex [K12]; 1xTMT6plex [N-Term]; 1xDBIA [C4]	P61160	ARP2_C11	1992.14	123.1	98.4	143.5	98	72	65
[R].ACYLSINPQK.[D]	1xTMT6plex [K10]; 1xTMT6plex [N-Term]; 1xDBIA [C2]	P61163	ACTZ_C222	1891.09	116.4	93.5	162.5	89.4	66.9	71.2
[K].LCIEVTPQSK.[I]	1xTMT6plex [K10]; 1xTMT6plex [N-Term]; 1xDBIA [C2]	P61221	ABCE1_C38	1872.1	118.9	92.4	135.4	104.3	76.6	72.4
[R].YCANAFK.[L]	1xTMT6plex [K7]; 1xTMT6plex [N-Term]; 1xDBIA [C2]	P61221	ABCE1_C88	1570.88	118	93.3	166.3	94.8	52.6	75
[K].ALAEEWSCPFMETSAK.[N]	1xTMT6plex [K16]; 1xTMT6plex [N-Term]; 1xDBIA [C8]	P61225	RAP2B_C140	2554.31	85.8	77	114.2	90	145	88
[K].MCSMVK.[K]	1xTMT6plex [K6]; 1xTMT6plex [N-Term]; 1xDBIA [C2]	P61247	RS3A_C111	1452.81	122.5	106.1	142.9	84.3	76.4	67.8
[R].LFCVGFTK.[K]	1xTMT6plex [K8]; 1xTMT6plex [N-Term]; 1xDBIA [C3]	P61247	RS3A_C139	1668.99	111.2	94.6	135.3	86.7	97.8	74.3
[K].ACQSIYPLHDVFVR.[K]	1xTMT6plex [N-Term]; 1xDBIA [C2]	P61247	RS3A_C201	2173.18	111.2	101.2	135.3	77.2	100.4	74.6
[K].NCLTNFHGMDLTR.[D]	1xTMT6plex [N-Term]; 1xDBIA [C2]	P61247	RS3A_C96	2047.04	102	94.4	147	95	93.3	68.2
[R].RLDECEEAFQGTK.[V]	1xTMT6plex [K13]; 1xTMT6plex [N-Term]; 1xDBIA [C5]	P61289	PSME3_C92	2280.21	114.8	95.4	119.8	97.4	104.6	68
[R].LDECEEAFQGTK.[V]	1xTMT6plex [K12]; 1xTMT6plex [N-Term]; 1xDBIA [C4]	P61289	PSME3_C92	2124.1	115.7	86.1	117.9	97.4	110.6	72.4
[K].IIPTLEEGLQLPSPTATSQLPLESDAVECLNYQHYK.[G]	1xTMT6plex [K36]; 1xTMT6plex [N-Term]; 1xDBIA [C29]	P61978	HNRPK_C132	4752.52	75.7	72.2	99.4	88.9	186.9	76.9
[K].GSDFDCELR.[L]	1xTMT6plex [N-Term]; 1xDBIA [C6]	P61978	HNRPK_C145	1566.78	104.8	74.4	147	93	112	68.8
[R].GNHECASINR.[I]	1xTMT6plex [N-Term]; 1xDBIA [C5]	P62136	PP1A_C127	1625.84	84.4	87.2	123.8	88	128	88.6
[K].TFTDCFNCLPIAAIVDEK.[I]	1xCarbamidomethyl [C8]; 1xTMT6plex [K18]; 1xTMT6plex [N-Term]; 1xDBIA [C5]	P62136	PP1A_C155	2811.48	141.7	67.2	120.9	101.2	89.6	79.3
[K].AICTEAGLMALR.[E]	1xTMT6plex [N-Term]; 1xDBIA [C3]	P62191	PRS4_C399	1773.99	97.7	82.9	127	94.3	111.7	86.3
[K].LPLVTPHTQCR.[L]	1xTMT6plex [N-Term]; 1xDBIA [C10]	P62191	PRS4_C58	1790.03	114.2	94.2	145.8	97.1	73.9	74.9
[K].FVVDVDKNIDINDVTPNCR.[V]	1xTMT6plex [K7]; 1xTMT6plex [N-Term]; 1xDBIA [C18]	P62195	PRS8_C112	2930.58	105	87.4	137.6	106.2	71.8	92
[K].NCIVLIDSTPYR.[Q]	1xTMT6plex [N-Term]; 1xDBIA [C2]	P62241	RS8_C100	1919.06	110.5	101.6	137.4	78.9	110.2	61.4
[K].LLACIASRPGQCGR.[A]	1xCarbamidomethyl [C4]; 1xTMT6plex [N-Term]; 1xDBIA [C12]	P62241	RS8_C182	2027.12	112.8	93.3	151	103.8	80.4	58.7
[R].QVLIRPCSK.[V]	1xTMT6plex [K9]; 1xTMT6plex [N-Term]; 1xDBIA [C7]	P62244	RS15A_C30	1798.11	110.2	100.2	133.4	89.9	100.6	65.7
[K].TATAVAHCK.[R]	1xTMT6plex [K9]; 1xTMT6plex [N-Term]; 1xDBIA [C8]	P62249	RS16_C25	1655.97	104.4	129	125.7	83.1	100.9	56.8
[K].LICCDILDVLDK.[H]	1xCarbamidomethyl [C4]; 1xTMT6plex [K12]; 1xTMT6plex [N-Term]; 1xDBIA [C3]	P62258	1433E_C97	2174.23	119.4	91.9	126.3	88.6	99.6	74.2
[K].LICCDILDVLDKHLIPAANTGESK.[V]	1xCarbamidomethyl [C3]; 2xTMT6plex [K12; K24]; 1xTMT6plex [N-Term]; 1xDBIA [C4]	P62258	1433E_C98	3622.03	119.9	83.3	171.1	92.9	58.7	74.1
[K].ITAFVPNDGCLNFIEENDEVLVAGFGR.[K]	1xTMT6plex [N-Term]; 1xDBIA [C10]	P62266	RS23_C90	3464.77	109.9	100.4	112.8	91.6	125.3	60.1
[K].NMSVHLSPCFR.[D]	1xOxidation [M2]; 1xTMT6plex [N-Term]; 1xDBIA [C9]	P62280	RS11_C116	1831.95	102.8	102.4	158.5	85.4	86.4	64.5
[K].NMSVHLSPCFR.[D]	1xTMT6plex [N-Term]; 1xDBIA [C9]	P62280	RS11_C116	1815.96	97.3	111.5	152.2	84.4	85.5	68.9
[R].DVQIGDIVTVGECRPLSK.[T]	1xTMT6plex [K18]; 1xTMT6plex [N-Term]; 1xDBIA [C13]	P62280	RS11_C131	2683.52	100.2	75.3	91.6	84.3	185	63.5
[K].KCPFTGNVSIR.[G]	1xTMT6plex [K1]; 1xTMT6plex [N-Term]; 1xDBIA [C2]	P62280	RS11_C60	1976.15	131.9	104	150	86.2	70.4	57.6
[K].CPFTGNVSIR.[G]	1xTMT6plex [N-Term]; 1xDBIA [C1]	P62280	RS11_C60	1618.89	126.3	96.2	151.3	88.2	88.8	49.3
[R].IEGCIIGFDEYMNLVLDDAEEIHSK.[T]	1xTMT6plex [K25]; 1xTMT6plex [N-Term]; 1xDBIA [C4]	P62304	RUXE_C46	3607.84	92.3	73.5	95.7	94.3	171.6	72.6
[K].GCLLYGPPGTGK.[T]	1xTMT6plex [K12]; 1xTMT6plex [N-Term]; 1xDBIA [C2]	P62333	PRS10_C170	1917.1	116.3	92.3	150.4	98.3	69	73.7
[R].AVASQLDCNFLK.[V]	1xTMT6plex [K12]; 1xTMT6plex [N-Term]; 1xDBIA [C8]	P62333	PRS10_C193	2063.17	101.8	88.6	131.8	90.9	107.3	79.7
[R].DHQPCIIFMDEIDAIGGR.[R]	1xTMT6plex [N-Term]; 1xDBIA [C5]	P62333	PRS10_C228	2555.29	116.2	92.3	152.9	90.5	78.3	69.8
[K].VNIDFEPFKPINTSLYLCDNK.[F]	2xTMT6plex [K9; K21]; 1xTMT6plex [N-Term]; 1xDBIA [C18]	P62495	ERF1_C127	3453.91	113.1	82	142	84.8	90.8	87.3
[R].DCDHADEQK.[C]	1xTMT6plex [K9]; 1xTMT6plex [N-Term]; 1xDBIA [C2]	P62633	CNBP_C111	1814.91	115.3	82.3	135.9	104.7	90.1	71.7
[K].TSEVNCYR.[C]	1xTMT6plex [N-Term]; 1xDBIA [C6]	P62633	CNBP_C158	1496.77	133.1	89.6	142.6	104.3	63.8	66.6
[R].CGESGHLAR.[E]	1xTMT6plex [N-Term]; 1xDBIA [C1]	P62633	CNBP_C161	1454.77	109.9	101	98.5	105.3	103.5	81.7
[R].GFQFVSSSLPDICYR.[C]	1xTMT6plex [N-Term]; 1xDBIA [C13]	P62633	CNBP_C54	2244.17	120.6	87.6	165.1	82.6	72.6	71.5
[K].FDTGNLCMVTGGANLGR.[I]	1xTMT6plex [N-Term]; 1xDBIA [C7]	P62701	RS4X_C181	2251.15	103.4	88.5	146.3	84.5	97.2	80
[K].LRECLPLIIFLR.[N]	1xTMT6plex [N-Term]; 1xDBIA [C4]	P62701	RS4X_C41	2011.25	109.2	84.7	139.3	99.5	104.3	62.9
[K].ELDQWVEQLNECK.[Q]	1xTMT6plex [K13]; 1xTMT6plex [N-Term]; 1xDBIA [C12]	P62714	PP2AB_C20	2388.26	117.7	87.6	131	98.2	85.4	80
[R].GCIVDANLSVLNLVIVK.[K]	1xTMT6plex [K17]; 1xTMT6plex [N-Term]; 1xDBIA [C2]	P62753	RS6_C100	2524.53	112.7	102.2	139.6	93.3	97	55.2
[K].LNISFPATGCQK.[L]	1xTMT6plex [K12]; 1xTMT6plex [N-Term]; 1xDBIA [C10]	P62753	RS6_C12	2033.16	128.6	108	140.2	88.7	75.6	58.9
[K].GHSCYRPR.[R]	1xTMT6plex [N-Term]; 1xDBIA [C4]	P62753	RS6_C83	1500.81	111.1	88.1	166.1	85.4	88.8	60.4
[K].SDPSIVLLLQCDIQK.[-]	1xTMT6plex [K15]; 1xTMT6plex [N-Term]; 1xDBIA [C11]	P62760	VISL1_C187	2426.41	119.5	109.2	131	102.7	75.7	61.9
[K].ECADLWPR.[I]	1xTMT6plex [N-Term]; 1xDBIA [C2]	P62829	RL23_C125	1514.8	120.8	96	169.2	97.5	53.4	63.1
[R].ISLGLPVGAVINCADNTGAK.[N]	1xTMT6plex [K20]; 1xTMT6plex [N-Term]; 1xDBIA [C13]	P62829	RL23_C28	2667.53	119.4	93.5	132.3	100.2	89.2	65.3
[R].CTNCAR.[C]	1xCarbamidomethyl [C4]; 1xTMT6plex [N-Term]; 1xDBIA [C1]	P62854	RS26_C23	1249.63	157.8	118.3	107.6	96.4	68	51.9
[K].LHYCVSCAIHSK.[V]	1xCarbamidomethyl [C4]; 1xTMT6plex [K12]; 1xTMT6plex [N-Term]; 1xDBIA [C7]	P62854	RS26_C77	2172.18	105.5	114.4	136.1	87.3	99.5	57.3
[R].TGSQGQCTQVR.[V]	1xTMT6plex [N-Term]; 1xDBIA [C7]	P62857	RS28_C27	1689.89	101.4	142.7	113	75	100.7	67.1
[K].ACADATLSQITNNIDPVGR.[I]	1xTMT6plex [N-Term]; 1xDBIA [C2]	P62873	GBB1_C25	2484.31	100.5	88	139.5	81.7	123.2	67.1
[R].ADQELMTYSHDNIICGITSVSFSK.[S]	1xTMT6plex [K24]; 1xTMT6plex [N-Term]; 1xDBIA [C15]	P62873	GBB1_C271	3413.75	89.2	79.6	109.2	87.6	147.4	86.9
[K].ACGDSTLTQITAGLDPVGR.[I]	1xTMT6plex [N-Term]; 1xDBIA [C2]	P62879	GBB2_C25	2400.28	108.5	87.9	131.8	97.5	93	81.4
[K].VLCLAVAVGHVK.[M]	1xTMT6plex [K12]; 1xTMT6plex [N-Term]; 1xDBIA [C3]	P62906	RL10A_C164	1963.23	114.1	104.8	142.8	91.3	85.7	61.2
[K].ELEVLLMCNK.[S]	1xTMT6plex [K10]; 1xTMT6plex [N-Term]; 1xDBIA [C8]	P62910	RL32_C91	1946.12	111.3	89.5	120.5	99.1	112.3	67.3
[K].ELEVLLMCNK.[S]	1xOxidation [M7]; 1xTMT6plex [K10]; 1xTMT6plex [N-Term]; 1xDBIA [C8]	P62910	RL32_C91	1962.12	110.4	81.2	135.6	101.6	105.5	65.9
[K].SYCAEIAHNVSSK.[N]	1xTMT6plex [K13]; 1xTMT6plex [N-Term]; 1xDBIA [C3]	P62910	RL32_C96	2163.16	116.6	92.8	151.5	93.5	84.9	60.6
[K].GSCFHR.[I]	1xTMT6plex [N-Term]; 1xDBIA [C3]	P62937	PPIA_C52	1231.66	101	100.5	180.2	80.9	76.1	61.2
[R].IIPGFMCQGGDFTR.[H]	1xTMT6plex [N-Term]; 1xDBIA [C7]	P62937	PPIA_C62	2067.07	135.3	95.2	139.9	85.8	75.2	68.7
[R].ECPSDECGAGVFMASHFDR.[H]	1xCarbamidomethyl [C7]; 1xTMT6plex [N-Term]; 1xDBIA [C2]	P62979	RS27A_C121	2640.18	104.7	105.9	134.5	82.6	112.9	59.5
[R].ECPSDECGAGVFMASHFDR.[H]	1xCarbamidomethyl [C7]; 1xOxidation [M13]; 1xTMT6plex [N-Term]; 1xDBIA [C2]	P62979	RS27A_C121	2656.18	98.6	95.5	127.9	93.7	112.5	71.8
[K].CGHTNNLRPK.[K]	1xTMT6plex [K10]; 1xTMT6plex [N-Term]; 1xDBIA [C1]	P62987	RL40_C115	1894.08	117.3	97.1	167.8	95.4	56.6	65.9
[K].VLNEECDQNWYK.[A]	1xTMT6plex [K12]; 1xTMT6plex [N-Term]; 1xDBIA [C6]	P62993	GRB2_C32	2295.18	119.8	94.7	149.2	90.6	78.2	67.5
[R].ANPDPNCCLGVFGLSLYTTER.[D]	1xCarbamidomethyl [C8]; 1xTMT6plex [N-Term]; 1xDBIA [C7]	P62995	TRA2B_C118	2852.43	91.3	79.5	118.2	85.5	146.6	78.9
[R].HHCPNTPIILVGTK.[L]	1xTMT6plex [K14]; 1xTMT6plex [N-Term]; 1xDBIA [C3]	P63000	RAC1_C105	2284.34	105.9	77.2	159	101.9	75	81
[R].AVLCPPPVK.[K]	1xTMT6plex [K9]; 1xTMT6plex [N-Term]; 1xDBIA [C4]	P63000	RAC1_C178	1678.05	107.8	95.2	135.1	92.7	92.8	76.6
[R].YDDMAACMK.[S]	1xTMT6plex [K9]; 1xTMT6plex [N-Term]; 1xDBIA [C7]	P63104	1433Z_C25	1801.91	132.1	91.9	138	101	65.2	71.7
[K].MFHPNVYADGSICLDILQNR.[W]	1xOxidation [M1]; 1xTMT6plex [N-Term]; 1xDBIA [C13]	P63146	UBE2B_C88	2847.45	112.8	94.1	138	85.2	100.4	69.6
[K].MFHPNVYADGSICLDILQNR.[W]	1xTMT6plex [N-Term]; 1xDBIA [C13]	P63146	UBE2B_C88	2831.45	107.7	96.7	125.9	97	97.5	75.2
[K].GLLDVTCK.[T]	1xTMT6plex [K8]; 1xTMT6plex [N-Term]; 1xDBIA [C7]	P63208	SKP1_C120	1602.97	86.7	99.2	140.8	87.6	112.5	73.2
[R].KENQWCEEK.[-]	2xTMT6plex [K1; K9]; 1xTMT6plex [N-Term]; 1xDBIA [C6]	P63208	SKP1_C160	2177.2	96.5	96.5	151.7	90.4	94.4	70.5
[K].ENQWCEEK.[-]	1xTMT6plex [K8]; 1xTMT6plex [N-Term]; 1xDBIA [C5]	P63208	SKP1_C160	1819.94	91.5	87.5	163.2	104.3	83.5	69.9
[K].CSASNR.[I]	1xTMT6plex [N-Term]; 1xDBIA [C1]	P63220	RS21_C17	1162.62	117.3	88.2	159.7	91.7	87.1	55.9
[K].TYAICGAIR.[R]	1xTMT6plex [N-Term]; 1xDBIA [C5]	P63220	RS21_C56	1492.85	108.7	110.3	119.1	85.5	105.8	70.6
[K].YDCGEEILITVLSAMTEEAAVAIK.[A]	1xTMT6plex [K24]; 1xTMT6plex [N-Term]; 1xDBIA [C3]	P63241	IF5A1_C129	3323.79	119.6	96.2	89.5	103.2	93.4	98.1
[K].KYEDICPSTHNMDVPNIK.[R]	2xTMT6plex [K1; K18]; 1xTMT6plex [N-Term]; 1xDBIA [C6]	P63241	IF5A1_C73	3087.66	103	101.3	169.3	87.9	71.1	67.4
[R].YWLCAATGPSIK.[I]	1xTMT6plex [K12]; 1xTMT6plex [N-Term]; 1xDBIA [C4]	P63244	RACK1_C249	2064.17	121.2	97.9	140.8	78	94.6	67.4
[K].QILLGIQELLNEPNIQDPAQAEAYTIYCQNR.[V]	1xTMT6plex [N-Term]; 1xDBIA [C28]	P63279	UBC9_C138	4084.14	102.4	86.4	103.8	91.2	147.5	68.8
[K].EENVGLHQTLDQTLNELNCI.[-]	1xTMT6plex [N-Term]; 1xDBIA [C19]	P67936	TPM4_C247	2808.44	103.9	93.6	145.3	88.3	96.6	72.3
[K].SGDAAIVDMVPGKPMCVESFSDYPPLGR.[F]	1xTMT6plex [K13]; 1xTMT6plex [N-Term]; 1xDBIA [C16]	P68104	EF1A1_C411	3692.89	104.9	91.2	110.8	96.3	119.5	77.2
[K].SGDAAIVDMVPGKPMCVESFSDYPPLGR.[F]	1xOxidation [M]; 1xTMT6plex [K13]; 1xTMT6plex [N-Term]; 1xDBIA [C16]	P68104	EF1A1_C411	3708.88	98.7	92	121.3	94.4	120	73.6
[K].AYHEQLSVAEITNACFEPANQMVK.[C]	1xTMT6plex [K24]; 1xTMT6plex [N-Term]; 1xDBIA [C15]	P68363	TBA1B_C295	3447.78	107.6	108.5	139.6	93.9	81.5	68.9
[K].AYHEQLSVAEITNACFEPANQMVK.[C]	1xOxidation [M22]; 1xTMT6plex [K24]; 1xTMT6plex [N-Term]; 1xDBIA [C15]	P68363	TBA1B_C295	3463.78	103.5	103.9	138.5	96.9	83.6	73.6
[K].RSIQFVDWCPTGFK.[V]	1xTMT6plex [K14]; 1xTMT6plex [N-Term]; 1xDBIA [C9]	P68363	TBA1B_C347	2438.34	134.7	100.9	181.9	88.2	48.4	45.9
[R].SIQFVDWCPTGFK.[V]	1xTMT6plex [K13]; 1xTMT6plex [N-Term]; 1xDBIA [C8]	P68363	TBA1B_C347	2282.24	127.3	107.1	156.4	96.3	53.3	59.6
[R].AVCMLSNTTAIAEAWAR.[L]	1xTMT6plex [N-Term]; 1xDBIA [C3]	P68363	TBA1B_C376	2333.23	131.2	106.1	144.5	97.8	62.3	58.1
[R].AVCMLSNTTAIAEAWAR.[L]	1xOxidation [M4]; 1xTMT6plex [N-Term]; 1xDBIA [C3]	P68363	TBA1B_C376	2349.23	128.3	103.7	147.1	94.1	68.4	58.5
[R].FQSSAVMALQEACEAYLVGLFEDTNLCAIHAK.[R]	1xCarbamidomethyl [C13]; 1xTMT6plex [K32]; 1xTMT6plex [N-Term]; 1xDBIA [C27]	P68431	H31_C111	4284.19	82.1	57.4	76.8	81.5	206.7	95.5
[R].EMGSCMEFKDR.[E]	1xTMT6plex [K9]; 1xTMT6plex [N-Term]; 1xDBIA [C5]	P78332	RBM6_C277	2087.05	89.5	71.5	141.4	94.9	103	99.7
[K].GPEDSGAGGTGCGGADDPAK.[K]	1xTMT6plex [K20]; 1xTMT6plex [N-Term]; 1xDBIA [C12]	P78337	PITX1_C77	2473.2	102.9	88.8	140.9	90.8	106.9	69.6
[K].DMGEDLECLCQIMR.[T]	1xCarbamidomethyl [C8]; 1xTMT6plex [N-Term]; 1xDBIA [C10]	P78344	IF4G2_C255	2238.06	118	114.6	113.3	89.2	90.8	74
[K].QEGIATSDNFMQAFLNVLDQCPK.[L]	1xTMT6plex [K23]; 1xTMT6plex [N-Term]; 1xDBIA [C21]	P78344	IF4G2_C629	3323.72	113.5	87	135.3	105.6	86.2	72.4
[K].CSIAVDISENLK.[E]	1xTMT6plex [K12]; 1xTMT6plex [N-Term]; 1xDBIA [C1]	P78345	RPP38_C80	2046.17	114.2	92	149.2	96	77.9	70.8
[R].LTIIVSDPSHCNVLR.[A]	1xTMT6plex [N-Term]; 1xDBIA [C11]	P78346	RPP30_C87	2192.24	99.5	85.7	117.7	96.4	130.2	70.6
[R].SILSPGGSCGPIK.[V]	1xTMT6plex [K13]; 1xTMT6plex [N-Term]; 1xDBIA [C9]	P78347	GTF2I_C215	1970.15	112.2	83.6	145.5	92.5	90.2	76
[K].YCVEEEEK.[A]	1xTMT6plex [K8]; 1xTMT6plex [N-Term]; 1xDBIA [C2]	P78347	GTF2I_C80	1782.93	110.2	79.9	161.3	101	77.6	70
[K].ITINPGCVVVDGMPPGVSFK.[A]	1xTMT6plex [K20]; 1xTMT6plex [N-Term]; 1xDBIA [C7]	P78347	GTF2I_C903	2784.56	88.7	97.2	128.3	79	128.8	78
[R].SLHDALCVLAQTVK.[D]	1xTMT6plex [K14]; 1xTMT6plex [N-Term]; 1xDBIA [C7]	P78371	TCPB_C395	2252.32	91.9	93.9	128.3	91.9	120.9	73.2
[R].TVYGGGCSEMLMAHAVTQLANR.[T]	1xTMT6plex [N-Term]; 1xDBIA [C7]	P78371	TCPB_C412	2834.43	106.5	111.9	116.8	102.1	80.1	82.6
[K].APNYSCVMTGSWDK.[T]	1xTMT6plex [K14]; 1xTMT6plex [N-Term]; 1xDBIA [C6]	P78406	RAE1L_C143	2313.18	99	99.2	170.3	97.1	67.1	67.3
[K].DIEVTSSPDDSIGCLSFSPPTLPGNFLIAGSWANDVR.[C]	1xTMT6plex [N-Term]; 1xDBIA [C14]	P78406	RAE1L_C44	4403.21	90.5	86.1	120.1	78.3	149.7	75.3
[K].AQQMHTGPVLDVCWSDDGSK.[V]	1xTMT6plex [K20]; 1xTMT6plex [N-Term]; 1xDBIA [C13]	P78406	RAE1L_C93	2928.47	102.7	87.3	135.6	87.9	109.8	76.6
[R].GFPPSASLCLLDLVK.[W]	1xTMT6plex [K15]; 1xTMT6plex [N-Term]; 1xDBIA [C9]	P78527	PRKDC_C1164	2314.36	103.2	83.9	121.5	86.8	129.2	75.3
[K].EEGVSFLINTFEGGGCGQPSGILAQPTLLYLR.[G]	1xTMT6plex [N-Term]; 1xDBIA [C16]	P78527	PRKDC_C1229	3892.05	95.8	69.3	116.6	71.4	163.3	83.7
[K].DLCNTHLMR.[V]	1xTMT6plex [N-Term]; 1xDBIA [C3]	P78527	PRKDC_C1364	1627.86	106.1	84.9	134.1	86.5	92.1	96.3
[R].QCLPSLDLSCK.[Q]	1xCarbamidomethyl [C2]; 1xTMT6plex [K11]; 1xTMT6plex [N-Term]; 1xDBIA [C10]	P78527	PRKDC_C1507	2018.12	112.2	80.7	156.9	90.2	89.2	70.9
[R].GSCVTQVGLLESVYEMFR.[K]	1xOxidation [M16]; 1xTMT6plex [N-Term]; 1xDBIA [C3]	P78527	PRKDC_C1791	2559.31	89.3	95	123.5	93.7	120.2	78.3
[R].GSCVTQVGLLESVYEMFR.[K]	1xTMT6plex [N-Term]; 1xDBIA [C3]	P78527	PRKDC_C1791	2543.32	97.3	80.7	129.3	79.5	129.4	83.8
[K].INQVFHGSCITEGNELTK.[T]	1xTMT6plex [K18]; 1xTMT6plex [N-Term]; 1xDBIA [C9]	P78527	PRKDC_C1904	2744.48	96.5	82.3	119.3	81.5	137.6	82.8
[K].GLSSLLCNFTK.[S]	1xTMT6plex [K11]; 1xTMT6plex [N-Term]; 1xDBIA [C7]	P78527	PRKDC_C232	1937.13	127.6	92.9	156.2	86.1	73.2	63.9
[K].NILEESLCELVAK.[Q]	1xTMT6plex [K13]; 1xTMT6plex [N-Term]; 1xDBIA [C8]	P78527	PRKDC_C2342	2215.28	79.1	79.6	91.5	80.8	184.9	84.1
[R].ELLNPVVEFVSHPSTTCR.[E]	1xTMT6plex [N-Term]; 1xDBIA [C17]	P78527	PRKDC_C2469	2553.37	94.2	74.3	135.9	89	127.3	79.4
[R].CGAALAGHQLIR.[G]	1xTMT6plex [N-Term]; 1xDBIA [C1]	P78527	PRKDC_C25	1735	114.1	84.8	160.7	97.3	77.2	66
[R].GYGLFAGPCK.[V]	1xTMT6plex [K10]; 1xTMT6plex [N-Term]; 1xDBIA [C9]	P78527	PRKDC_C373	1767	105.3	91.6	139.9	91.3	92.3	79.7
[R].APPCEYK.[D]	1xTMT6plex [K7]; 1xTMT6plex [N-Term]; 1xDBIA [C4]	P78527	PRKDC_C3837	1561.88	98.4	88.1	154.8	94.7	93.5	70.5
[K].DILPCLDGYLK.[T]	1xTMT6plex [K11]; 1xTMT6plex [N-Term]; 1xDBIA [C5]	P78527	PRKDC_C795	2004.16	102	84.6	113.3	87.8	133.6	78.8
[R].LACDVDQVTR.[Q]	1xTMT6plex [N-Term]; 1xDBIA [C3]	P78527	PRKDC_C974	1644.89	103.8	77.1	146.1	82.3	111.7	79
[K].SPCGLTEQYLHK.[D]	1xTMT6plex [K12]; 1xTMT6plex [N-Term]; 1xDBIA [C3]	P78559	MAP1A_C1174	2130.18	98.5	91.7	181.1	89.7	66.2	72.7
[K].AENEEAAACPAWER.[G]	1xTMT6plex [N-Term]; 1xDBIA [C9]	P78559	MAP1A_C2385	2072.01	121.4	104.2	142.4	91.2	72.4	68.5
[K].DSSLCVSGETLAAGTSSPK.[T]	1xTMT6plex [K19]; 1xTMT6plex [N-Term]; 1xDBIA [C5]	P82094	TMF1_C158	2564.36	107.9	66.2	114	92.2	131.3	88.4
[K].DFCTEWPAALDSDEK.[C]	1xTMT6plex [K15]; 1xTMT6plex [N-Term]; 1xDBIA [C3]	P82673	RT35_C130	2481.24	111.7	85.4	126.1	88.6	100.1	88
[K].ASHNNTQIQVVSASNEPLAFASCGTEGFR.[N]	1xTMT6plex [N-Term]; 1xDBIA [C23]	P82912	RT11_C112	3560.78	87.3	86	124.4	88.9	125.3	88
[K].ECEGIVPVPLAEK.[L]	1xTMT6plex [K13]; 1xTMT6plex [N-Term]; 1xDBIA [C2]	P82932	RT06_C105	2138.23	97.3	79.2	108.2	91.6	150.4	73.3
[K].HPLTQELKECEGIVPVPLAEK.[L]	2xTMT6plex [K8; K21]; 1xTMT6plex [N-Term]; 1xDBIA [C10]	P82932	RT06_C105	3313.92	87	64.6	83.4	105.7	180.1	79.3
[R].LPPIPYPNAPCFNNVAEYESFLR.[T]	1xTMT6plex [N-Term]; 1xDBIA [C11]	P83369	LSM11_C52	3176.64	101.1	94.5	157.8	98.4	78.9	69.2
[K].YLSDSCSPR.[S]	1xTMT6plex [N-Term]; 1xDBIA [C6]	P83436	COG7_C505	1552.8	94.9	95.4	147.2	98	71.7	92.7
[K].CESAFLSK.[R]	1xTMT6plex [K8]; 1xTMT6plex [N-Term]; 1xDBIA [C1]	P83731	RL24_C36	1638.93	132.7	95.1	165.2	92.7	46.9	67.5
[K].VELCSFSGYK.[I]	1xTMT6plex [K10]; 1xTMT6plex [N-Term]; 1xDBIA [C4]	P83731	RL24_C6	1887.05	133.6	92.9	162.3	97.9	50.1	63.2
[K].GFSDEDNTWEPEENLDCPDLIAEFLQSQK.[T]	1xTMT6plex [K29]; 1xTMT6plex [N-Term]; 1xDBIA [C17]	P83916	CBX1_C60	4123.98	37	39.7	45.1	42	382.4	53.8
[R].LLQCDPSSASQF.[-]	1xTMT6plex [N-Term]; 1xDBIA [C4]	P84074	HPCA_C185	1820.94	132.1	102.8	160.2	79.7	72.4	52.7
[R].FQSAAIGALQEASEAYLVGLFEDTNLCAIHAK.[R]	1xTMT6plex [K32]; 1xTMT6plex [N-Term]; 1xDBIA [C27]	P84243	H33_C111	4135.19	81.8	83.6	105.8	94.5	150.6	83.7
[R].SMVSPVPSPTGTISVPNSCPASPR.[G]	1xTMT6plex [N-Term]; 1xDBIA [C19]	P85037	FOXK1_C254	2893.51	124.7	117.2	130.1	111.4	42.1	74.5
[R].RLDSIVGPQLTVLASDICEQFNINK.[R]	1xTMT6plex [K25]; 1xTMT6plex [N-Term]; 1xDBIA [C18]	P86790	CCZ1B_C358	3527.97	112	96.8	116.8	94.1	109.4	70.8
[K].LCATQFNNIFFLD.[-]	1xTMT6plex [N-Term]; 1xDBIA [C2]	P86790	CCZ1B_C471	2071.09	111.4	103.9	136.9	112.4	69.9	65.4
[R].ASALCDR.[H]	1xTMT6plex [N-Term]; 1xDBIA [C5]	Q00005	2ABB_C258	1260.69	132.8	78.7	164.5	97.3	64.9	61.8
[K].GWAPTFLGYSMQGLCK.[F]	1xTMT6plex [K16]; 1xTMT6plex [N-Term]; 1xDBIA [C15]	Q00325	MPCP_C136	2513.34	99.1	84.1	114.5	78.9	135.8	87.6
[R].ANCEAAR.[S]	1xTMT6plex [N-Term]; 1xDBIA [C3]	Q00341	VIGLN_C636	1259.67	99	89.3	175.3	106.9	68	61.6
[K].DCDPGSPR.[R]	1xTMT6plex [N-Term]; 1xDBIA [C2]	Q00341	VIGLN_C940	1371.69	122.7	83	158.7	97.8	66.4	71.4
[R].RCDIIIISGR.[K]	1xTMT6plex [N-Term]; 1xDBIA [C2]	Q00341	VIGLN_C948	1670.99	121.2	90.4	147.1	102.4	70.8	68
[R].LFDVCTVSR.[T]	1xTMT6plex [N-Term]; 1xDBIA [C5]	Q00534	CDK6_C83	1564.87	121.6	109.1	179.1	93.9	41.2	55.1
[K].FGHTFCK.[Y]	1xTMT6plex [K7]; 1xTMT6plex [N-Term]; 1xDBIA [C6]	Q00577	PURA_C272	1593.9	107.9	99.2	164	88.5	65.9	74.5
[R].AACEQLHQQQQQQQEETAAATLLLQGEEEGEED.[-]	1xTMT6plex [N-Term]; 1xDBIA [C3]	Q00577	PURA_C292	4207.99	110.3	75.1	131.8	105	105.8	72
[K].QSVELCK.[K]	1xTMT6plex [K7]; 1xTMT6plex [N-Term]; 1xDBIA [C6]	Q00610	CLH1_C1528	1560.92	104.4	83.3	141.5	103.5	85.4	81.7
[K].VIQCFAETGQVQK.[I]	1xTMT6plex [K13]; 1xTMT6plex [N-Term]; 1xDBIA [C4]	Q00610	CLH1_C491	2205.25	117.1	91.9	149.3	97.8	75.4	68.4
[R].AHIAQLCEK.[A]	1xTMT6plex [K9]; 1xTMT6plex [N-Term]; 1xDBIA [C7]	Q00610	CLH1_C617	1767.04	116.6	97	137.8	96.8	76	75.7
[K].YIQAACK.[T]	1xTMT6plex [K7]; 1xTMT6plex [N-Term]; 1xDBIA [C6]	Q00610	CLH1_C736	1550.91	115.7	88.5	163.9	95.9	64.4	71.7
[R].ESNCYDPER.[V]	1xTMT6plex [N-Term]; 1xDBIA [C4]	Q00610	CLH1_C753	1637.78	124.3	86.5	150.6	97.3	70.7	70.7
[R].LPVVIGGLLDVDCSEDVIK.[N]	1xTMT6plex [K19]; 1xTMT6plex [N-Term]; 1xDBIA [C13]	Q00610	CLH1_C824	2738.58	70.4	74.7	82.5	69.5	221.4	81.5
[R].IHEGCEEPATHNALAK.[I]	1xTMT6plex [K16]; 1xTMT6plex [N-Term]; 1xDBIA [C5]	Q00610	CLH1_C870	2474.32	109.7	92.2	138.7	104.7	82.4	72.3
[K].QECMDSK.[L]	1xTMT6plex [K7]; 1xTMT6plex [N-Term]; 1xDBIA [C3]	Q00613	HSF1_C153	1594.83	130.1	84.4	151.1	98	74	62.5
[R].YGCEGPSHGGLPGASSEK.[G]	1xTMT6plex [K18]; 1xTMT6plex [N-Term]; 1xDBIA [C3]	Q00653	NFKB2_C57	2487.27	116.6	101.2	177.8	100.4	50.9	53
[R].ENDEFCK.[M]	1xTMT6plex [K7]; 1xTMT6plex [N-Term]; 1xDBIA [C6]	Q00796	DHSO_C106	1638.86	127.1	98.5	149.3	89.4	55.5	80.3
[R].YNLSPSIFFCATPPDDGNLCR.[F]	1xCarbamidomethyl [C20]; 1xTMT6plex [N-Term]; 1xDBIA [C10]	Q00796	DHSO_C120	2912.43	105.3	76.6	149.1	93.6	87.3	88.1
[K].TCNCETEDYGEK.[F]	1xCarbamidomethyl [C4]; 1xTMT6plex [K12]; 1xTMT6plex [N-Term]; 1xDBIA [C2]	Q00839	HNRPU_C389	2203.04	87	68.2	118	97	141.2	88.6
[K].FDENDVITCFANFESDEVELSYAK.[N]	1xTMT6plex [K24]; 1xTMT6plex [N-Term]; 1xDBIA [C9]	Q00839	HNRPU_C408	3539.73	96.3	76.9	113.9	87.5	143.3	82.1
[K].DCEVVMMIGLPGAGK.[T]	1xOxidation [M6]; 1xTMT6plex [K15]; 1xTMT6plex [N-Term]; 1xDBIA [C2]	Q00839	HNRPU_C497	2290.24	104.5	79.4	147.9	87.2	102.7	78.4
[K].KDCEVVMMIGLPGAGK.[T]	1xOxidation [M8]; 2xTMT6plex [K1; K16]; 1xTMT6plex [N-Term]; 1xDBIA [C3]	Q00839	HNRPU_C497	2647.5	90.6	85	145.9	100.6	105.1	72.8
[K].DCEVVMMIGLPGAGK.[T]	1xTMT6plex [K15]; 1xTMT6plex [N-Term]; 1xDBIA [C2]	Q00839	HNRPU_C497	2274.24	106.1	74	143.6	90	105.1	81.1
[K].KDCEVVMMIGLPGAGK.[T]	2xTMT6plex [K1; K16]; 1xTMT6plex [N-Term]; 1xDBIA [C3]	Q00839	HNRPU_C497	2631.5	93.5	74.1	128.8	98.3	108.3	97
[R].APQCLGK.[F]	1xTMT6plex [K7]; 1xTMT6plex [N-Term]; 1xDBIA [C4]	Q00839	HNRPU_C562	1470.89	111.9	93.9	144.5	81.6	100.8	67.3
[R].KAVVVCPK.[D]	2xTMT6plex [K1; K8]; 1xTMT6plex [N-Term]; 1xDBIA [C6]	Q00839	HNRPU_C607	1827.19	101.6	79.6	144.8	93.9	106.9	73.1
[K].AVVVCPKDEDYK.[Q]	2xTMT6plex [K7; K12]; 1xTMT6plex [N-Term]; 1xDBIA [C5]	Q00839	HNRPU_C607	2349.35	93	77.9	110.2	93.9	136.3	88.8
[K].GNFTLPEVAECFDEITYVELQK.[E]	1xTMT6plex [K22]; 1xTMT6plex [N-Term]; 1xDBIA [C11]	Q00839	HNRPU_C648	3299.73	62.7	62.9	69.2	70	254	81.1
[R].QYEMGECTR.[G]	1xTMT6plex [N-Term]; 1xDBIA [C7]	Q01081	U2AF1_C163	1641.79	102.2	78.5	150.7	94.8	98.5	75.3
[R].GGFCNFMHLKPISR.[E]	1xTMT6plex [K10]; 1xTMT6plex [N-Term]; 1xDBIA [C4]	Q01081	U2AF1_C169	2361.31	104.1	86.9	145.5	88.3	91.1	84.2
[R].CAVSDVEMQEHYDEFFEEVFTEMEEK.[Y]	1xTMT6plex [K26]; 1xTMT6plex [N-Term]; 1xDBIA [C1]	Q01081	U2AF1_C67	3954.82	96.7	78	124.5	95.2	117.6	88.1
[R].SLPGPAPCLK.[H]	1xTMT6plex [K10]; 1xTMT6plex [N-Term]; 1xDBIA [C8]	Q01433	AMPD2_C107	1737.05	127.1	114.5	154.8	104.4	42.3	57
[K].LVVECVMNNVTCTR.[I]	1xCarbamidomethyl [C5]; 1xTMT6plex [N-Term]; 1xDBIA [C12]	Q01469	FABP5_C127	2163.13	124.5	89.1	152.4	98.5	67.6	67.8
[K].LSIQCYLSALDR.[C]	1xTMT6plex [N-Term]; 1xDBIA [C5]	Q01581	HMCS1_C224	1907.06	99	83.6	134.5	96.7	104.3	81.9
[K].EVLQECK.[T]	1xTMT6plex [K7]; 1xTMT6plex [N-Term]; 1xDBIA [C6]	Q01658	NC2B_C94	1602.93	118.2	104.2	141.9	100.5	74.6	60.6
[K].EVIGGLCSLANIPLTPETQR.[D]	1xTMT6plex [N-Term]; 1xDBIA [C7]	Q01664	TFAP4_C29	2636.46	98.7	90.3	116.1	93.9	126.4	74.6
[R].VMQYHGCR.[S]	1xTMT6plex [N-Term]; 1xDBIA [C7]	Q01780	EXOSX_C93	1518.79	108.8	95.1	147	107.3	65.5	76.3
[R].AIVPPYSLCQTGEDLPK.[D]	1xTMT6plex [K17]; 1xTMT6plex [N-Term]; 1xDBIA [C9]	Q01804	OTUD4_C686	2585.44	119.8	115.9	124.9	97.3	82.2	59.9
[R].GCSHPGGSADGPAK.[K]	1xTMT6plex [K14]; 1xTMT6plex [N-Term]; 1xDBIA [C2]	Q01831	XPC_C60	1995.05	94.3	77.9	136.3	89.6	121.3	80.6
[K].GHEETCIR.[R]	1xTMT6plex [N-Term]; 1xDBIA [C6]	Q01850	CDR2_C331	1469.77	103.4	121.8	141.9	85	73.1	74.8
[K].EIFSCIK.[K]	1xTMT6plex [K7]; 1xTMT6plex [N-Term]; 1xDBIA [C5]	Q01850	CDR2_C432	1593.94	115.6	99.7	166.1	97.7	61.2	59.8
[R].ACLPTPPLQSNLFASLDETLLAR.[A]	1xTMT6plex [N-Term]; 1xDBIA [C2]	Q01851	PO4F1_C36	2995.65	103.2	102.4	131.5	122.6	70.1	70.2
[R].LCMPDANEVK.[S]	1xTMT6plex [K10]; 1xTMT6plex [N-Term]; 1xDBIA [C2]	Q01968	OCRL_C428	1874.03	122.9	103.9	138.6	94.2	73.9	66.3
[K].GIPACEQNVSR.[K]	1xTMT6plex [N-Term]; 1xDBIA [C5]	Q02040	AK17A_C563	1698.92	97	90.2	125.4	99.6	100.2	87.6
[K].KQITPSQCK.[E]	2xTMT6plex [K1; K9]; 1xTMT6plex [N-Term]; 1xDBIA [C8]	Q02224	CENPE_C2626	2016.22	119.3	105	149.3	109.2	48.8	68.4
[R].VRPLGFPDQECCIEVINNTTVQLHTPEGYR.[L]	1xCarbamidomethyl [C12]; 1xTMT6plex [N-Term]; 1xDBIA [C11]	Q02241	KIF23_C42	4011.04	131.4	77.9	125	98.8	105.9	61.1
[K].AICGLTPGRR.[Y]	1xTMT6plex [N-Term]; 1xDBIA [C3]	Q02241	KIF23_C447	1568.93	115.8	90.9	149.5	98.7	69.8	75.3
[K].AICGLTPGR.[R]	1xTMT6plex [N-Term]; 1xDBIA [C3]	Q02241	KIF23_C447	1412.82	114.5	70.8	134.7	99.1	94	86.9
[R].CMALSTAVLVGEAK.[K]	1xTMT6plex [K14]; 1xTMT6plex [N-Term]; 1xDBIA [C1]	Q02252	MMSA_C317	2147.23	121	81.9	161.9	91.4	73.2	70.6
[K].GGHQTSESCR.[G]	1xTMT6plex [N-Term]; 1xDBIA [C9]	Q02487	DSC2_C797	1586.79	99.4	115.4	198	87.7	55.8	43.6
[R].DLTTAGAVTQCYR.[D]	1xTMT6plex [N-Term]; 1xDBIA [C11]	Q02543	RL18A_C109	1924.02	112.2	87.1	143.3	84.5	90.9	82
[K].CHTPPLYR.[M]	1xTMT6plex [N-Term]; 1xDBIA [C1]	Q02543	RL18A_C22	1511.84	118.8	81.2	127.4	113.9	90.1	68.6
[K].TQLAVCQQR.[I]	1xTMT6plex [N-Term]; 1xDBIA [C6]	Q02790	FKBP4_C396	1571.89	124.1	84.5	163.4	92.3	68.1	67.7
[K].GKPHCSR.[N]	1xTMT6plex [K2]; 1xTMT6plex [N-Term]; 1xDBIA [C5]	Q02878	RL6_C44	1538.9	86.1	99.1	150.4	89.5	90.1	84.8
[R].AYDLAGSCR.[G]	1xTMT6plex [N-Term]; 1xDBIA [C8]	Q02880	TOP2B_C271	1480.78	108.3	75.1	159.1	82.7	99.8	75
[K].APQVTESIESSELVTTCQAETLAGVK.[S]	1xTMT6plex [K26]; 1xTMT6plex [N-Term]; 1xDBIA [C17]	Q02952	AKA12_C1139	3445.85	79.9	81.7	80.8	78.2	215.6	63.9
[K].EVSSLEGSPPPCLGQEEAVCTK.[I]	1xCarbamidomethyl [C12]; 1xTMT6plex [K22]; 1xTMT6plex [N-Term]; 1xDBIA [C20]	Q02952	AKA12_C1407	3071.58	114.7	96.9	118.3	101.4	97.3	71.5
[K].SDEVDEQVACQEVK.[V]	1xTMT6plex [K14]; 1xTMT6plex [N-Term]; 1xDBIA [C10]	Q02952	AKA12_C1521	2333.21	90.6	76.3	104.7	91.7	165.7	70.9
[K].GESSASSPEEPEEITCLEK.[G]	1xTMT6plex [K19]; 1xTMT6plex [N-Term]; 1xDBIA [C16]	Q02952	AKA12_C578	2776.4	71	70.3	89.8	69.6	225.5	73.7
[K].CNNPNGHGHNYK.[V]	1xTMT6plex [K12]; 1xTMT6plex [N-Term]; 1xDBIA [C1]	Q03393	PTPS_C43	2109.08	108.2	106.2	153.2	97.9	65.3	69.4
[K].DGDCVNR.[W]	1xTMT6plex [N-Term]; 1xDBIA [C4]	Q03426	KIME_C173	1303.66	132.4	90	162.5	100	55.1	60
[K].QQCLMALDTFK.[E]	1xTMT6plex [K11]; 1xTMT6plex [N-Term]; 1xDBIA [C3]	Q03701	CEBPZ_C282	2052.14	103	77.9	142.6	89.4	109.4	77.7
[K].ASHLLETLLCK.[H]	1xTMT6plex [K11]; 1xTMT6plex [N-Term]; 1xDBIA [C10]	Q03701	CEBPZ_C411	1982.19	88.4	81.8	128.6	91.2	129.8	80.2
[K].MLDPGLMTCSK.[Q]	1xTMT6plex [K11]; 1xTMT6plex [N-Term]; 1xDBIA [C9]	Q03701	CEBPZ_C560	1950.06	107.7	84.7	133.6	83.6	113.9	76.5
[R].DADEESIEDVDDEEFEELIDTFEDDNCFSSGK.[D]	1xTMT6plex [K32]; 1xTMT6plex [N-Term]; 1xDBIA [C27]	Q03701	CEBPZ_C856	4440.96	119.2	67.1	134.6	85.4	109.9	83.7
[R].DGFYEAELCPDR.[C]	1xTMT6plex [N-Term]; 1xDBIA [C9]	Q04206	TF65_C105	1939.94	115.4	90.5	154.9	94	77.9	67.2
[K].EAVQCVQELASPSLLFIFVR.[H]	1xTMT6plex [N-Term]; 1xDBIA [C5]	Q04637	IF4G1_C1265	2774.55	105.4	80.2	109.9	90.6	142.7	71.3
[K].YLCDEQK.[E]	1xTMT6plex [K7]; 1xTMT6plex [N-Term]; 1xDBIA [C3]	Q04637	IF4G1_C1516	1652.91	111.8	86.8	157.2	84.1	83.5	76.5
[R].LQGINCGPDFTPSFANLGR.[T]	1xTMT6plex [N-Term]; 1xDBIA [C6]	Q04637	IF4G1_C662	2532.32	126.3	90.2	167.6	94	60.2	61.8
[R].GPHCLNGGQCMDR.[I]	1xCarbamidomethyl [C4]; 1xTMT6plex [N-Term]; 1xDBIA [C10]	Q04721	NOTC2_C1241	1969.94	112.5	156.8	164.9	79.2	36.4	50.2
[R].GPDGCTPLMLASLR.[G]	1xTMT6plex [N-Term]; 1xDBIA [C5]	Q04721	NOTC2_C1829	1956.06	92.7	94	150.1	89.5	104.1	69.6
[R].LLDEYNVTPSPPGTVLTSALSPVICGPNR.[S]	1xTMT6plex [N-Term]; 1xDBIA [C25]	Q04721	NOTC2_C2085	3535.9	100.9	97.8	147.7	97.2	95.9	60.3
[K].SPVSQLDCLNR.[D]	1xTMT6plex [N-Term]; 1xDBIA [C8]	Q04724	TLE1_C526	1756.96	115.4	84.7	154.2	101.1	69.6	75
[K].AELTSSAPACYALAISPDSK.[V]	1xTMT6plex [K20]; 1xTMT6plex [N-Term]; 1xDBIA [C10]	Q04724	TLE1_C577	2749.48	127.2	88.7	130.8	104.2	75.8	73.3
[K].FTVAESCDR.[I]	1xTMT6plex [N-Term]; 1xDBIA [C7]	Q04726	TLE3_C26	1552.8	113.4	89.5	163.5	102.5	63.4	67.6
[R].GFGHIGIAVPDVYSACK.[R]	1xTMT6plex [K17]; 1xTMT6plex [N-Term]; 1xDBIA [C16]	Q04760	LGUL_C139	2488.38	106.9	101.2	156.1	94.5	72.2	69.1
[K].GAPNNSCSEIK.[M]	1xTMT6plex [K11]; 1xTMT6plex [N-Term]; 1xDBIA [C7]	Q05086	UBE3A_C108	1874.02	115.2	102.9	148.9	100.2	68.7	64
[K].AACSAAAMEEDSEASSSR.[I]	1xTMT6plex [N-Term]; 1xDBIA [C3]	Q05086	UBE3A_C198	2298.05	112.1	91.4	141.6	83.8	90	81.1
[K].ECSVEK.[G]	1xTMT6plex [K6]; 1xTMT6plex [N-Term]; 1xDBIA [C2]	Q05519	SRS11_C455	1448.82	106.8	97.6	127.5	87.1	99.5	81.5
[K].VLMSVQYFLEDVDCK.[Q]	1xTMT6plex [K15]; 1xTMT6plex [N-Term]; 1xDBIA [C14]	Q05655	KPCD_C127	2543.37	122.5	91.8	130.3	100.8	74.3	80.3
[K].QGFWEEFETLQQQECK.[L]	1xTMT6plex [K16]; 1xTMT6plex [N-Term]; 1xDBIA [C15]	Q06124	PTN11_C259	2784.41	124.1	93.6	133.7	92.6	91.8	64
[K].LGPVDMLVNCAGMAVSGK.[F]	1xTMT6plex [K18]; 1xTMT6plex [N-Term]; 1xDBIA [C10]	Q06136	KDSR_C121	2516.38	101	92.6	87.4	111.8	107.4	99.8
[K].CELENCQPFVVETLHGK.[I]	1xCarbamidomethyl [C6]; 1xTMT6plex [K17]; 1xTMT6plex [N-Term]; 1xDBIA [C1]	Q06203	PUR1_C100	2757.45	135.7	92.6	163.7	95.3	50.8	61.9
[K].YPCFMGINIPTK.[E]	1xTMT6plex [K12]; 1xTMT6plex [N-Term]; 1xDBIA [C3]	Q06203	PUR1_C426	2138.19	99.9	81.9	124.8	98.4	103.7	91.2
[K].GSCNLSR.[V]	1xTMT6plex [N-Term]; 1xDBIA [C3]	Q06210	GFPT1_C254	1261.69	136.9	97.7	174.7	102	42.4	46.3
[K].DWEANACK.[I]	1xTMT6plex [K8]; 1xTMT6plex [N-Term]; 1xDBIA [C7]	Q06210	GFPT1_C55	1690.9	126.2	91.6	156.4	80.4	79.1	66.3
[K].ETPLSNCER.[R]	1xTMT6plex [N-Term]; 1xDBIA [C7]	Q06265	EXOS9_C9	1573.82	122.5	92.3	150.5	94.6	69.4	70.7
[K].VDVFREDLCTK.[T]	1xTMT6plex [K11]; 1xTMT6plex [N-Term]; 1xDBIA [C9]	Q06323	PSME1_C22	2079.17	129.9	98.7	140.7	101.8	61.8	67.2
[R].EDLCTK.[T]	1xTMT6plex [K6]; 1xTMT6plex [N-Term]; 1xDBIA [C4]	Q06323	PSME1_C22	1462.83	148.1	88.6	126.2	95.3	54.6	87.2
[R].IIQFQATPCPK.[E]	1xTMT6plex [K11]; 1xTMT6plex [N-Term]; 1xDBIA [C9]	Q06330	SUH_C313	2000.18	105.4	83.7	124.2	92.4	117.8	76.6
[R].LVTECEQK.[K]	1xTMT6plex [K8]; 1xTMT6plex [N-Term]; 1xDBIA [C5]	Q06546	GABPA_C421	1703.98	130.8	92.8	115.8	102	85.3	73.4
[K].GEYCQTR.[Y]	1xTMT6plex [N-Term]; 1xDBIA [C4]	Q06587	RING1_C279	1381.71	106.5	82.3	153.1	102.3	89.9	65.9
[R].VDCNNER.[S]	1xTMT6plex [N-Term]; 1xDBIA [C3]	Q06787	FMR1_C584	1374.7	129.8	95	167	95.4	53	60
[K].KLNCQVIGASVDSHFCHLAWVNTPK.[K]	1xCarbamidomethyl [C4]; 2xTMT6plex [K1; K25]; 1xTMT6plex [N-Term]; 1xDBIA [C16]	Q06830	PRDX1_C83	3808.08	118	108.9	174.3	95.3	44.4	59.1
[K].LNCQVIGASVDSHFCHLAWVNTPKK.[Q]	1xCarbamidomethyl [C3]; 2xTMT6plex [K24; K25]; 1xTMT6plex [N-Term]; 1xDBIA [C15]	Q06830	PRDX1_C83	3808.08	101.5	113.3	188.1	81.6	50.9	64.5
[K].LNCQVIGASVDSHFCHLAWVNTPK.[K]	1xCarbamidomethyl [C3]; 1xTMT6plex [K24]; 1xTMT6plex [N-Term]; 1xDBIA [C15]	Q06830	PRDX1_C83	3450.82	112.7	106.8	164.4	79.6	71.7	64.8
[R].LEHEEGAPCTAIR.[E]	1xTMT6plex [N-Term]; 1xDBIA [C9]	Q07002	CDK18_C185	1951.03	100.4	79.7	124.8	99	115.2	80.9
[K].GCGTVLLSGPR.[K]	1xTMT6plex [N-Term]; 1xDBIA [C2]	Q07020	RL18_C134	1584.91	112.5	77.7	163.6	88.9	88.9	68.4
[K].ALVLDCHYPEDEVGQEDEAESDIFSIR.[E]	1xTMT6plex [N-Term]; 1xDBIA [C6]	Q07021	C1QBP_C186	3604.73	76.9	60.3	84.9	78	212.7	87.2
[K].SSSSSSASAAAAAAAASSSASCSR.[R]	1xTMT6plex [N-Term]; 1xDBIA [C22]	Q07065	CKAP4_C100	2558.23	234.2	115.1	181.1	35.3	13.9	20.4
[K].CLPGDPNYLVGANCVSVLIDHF.[-]	1xCarbamidomethyl [C14]; 1xTMT6plex [N-Term]; 1xDBIA [C1]	Q07157	ZO1_C1727	2928.49	113	73.7	168.7	98.3	73.2	73.1
[K].FLVPDMMDDICQEQFLELSYLNGVPEPSR.[G]	1xTMT6plex [N-Term]; 1xDBIA [C11]	Q07666	KHDR1_C264	3910.93	71.8	67.9	95.5	107.7	183.8	73.3
[R].IHCGLQDSQK.[A]	1xTMT6plex [K10]; 1xTMT6plex [N-Term]; 1xDBIA [C3]	Q07864	DPOE1_C1935	1883.06	115.8	93.2	155.9	95.7	68.9	70.5
[R].LVDVGEFSEEAQFRDPCR.[S]	1xTMT6plex [N-Term]; 1xDBIA [C17]	Q07864	DPOE1_C2148	2622.32	112.5	90.3	181	95.8	57.5	62.9
[K].LMAFTLQDLVCLK.[C]	1xTMT6plex [K13]; 1xTMT6plex [N-Term]; 1xDBIA [C11]	Q07864	DPOE1_C2221	2249.32	107.9	97.2	136.7	114.2	78.5	65.4
[K].LGYDPVELDPEDMCR.[M]	1xTMT6plex [N-Term]; 1xDBIA [C14]	Q07864	DPOE1_C445	2277.11	108.3	94	141.1	91.9	84.8	79.9
[R].LCQENQWLRDELANTQQK.[L]	1xTMT6plex [K18]; 1xTMT6plex [N-Term]; 1xDBIA [C2]	Q07866	KLC1_C114	2971.58	98.9	103.7	130	104.4	83.9	79
[K].YKEAEPLCK.[R]	2xTMT6plex [K2; K9]; 1xTMT6plex [N-Term]; 1xDBIA [C8]	Q07866	KLC1_C320	2064.21	102.3	81.6	127.3	117.5	78.7	92.7
[R].EFGSVDDENKPIWMHAEEREECK.[G]	2xTMT6plex [K10; K23]; 1xTMT6plex [N-Term]; 1xDBIA [C22]	Q07866	KLC1_C436	3761.89	114	105.2	111	97.2	101.1	71.5
[R].GCPGDGPEAGRPADK.[I]	1xTMT6plex [K15]; 1xTMT6plex [N-Term]; 1xDBIA [C2]	Q07912	ACK1_C948	2181.15	104.2	103.4	148.1	94.9	85	64.3
[R].GPAGNNDCR.[I]	1xTMT6plex [N-Term]; 1xDBIA [C8]	Q07955	SRSF1_C16	1428.72	104	79.5	152.9	85.4	97.9	80.3
[K].SSVNCPFSSQDMK.[Y]	1xOxidation [M12]; 1xTMT6plex [K13]; 1xTMT6plex [N-Term]; 1xDBIA [C5]	Q08211	DHX9_C1029	2200.11	107.7	74.9	106.5	96.9	129.6	84.4
[K].LQISHEAAACITGLR.[A]	1xTMT6plex [N-Term]; 1xDBIA [C10]	Q08211	DHX9_C1099	2108.18	91.9	72.6	124.8	87.9	147.8	75.1
[R].AAECNIVVTQPR.[R]	1xTMT6plex [N-Term]; 1xDBIA [C4]	Q08211	DHX9_C438	1826.02	101.8	82	121	92.8	127.4	74.9
[R].VRPGFCFHLCSR.[A]	1xCarbamidomethyl [C6]; 1xTMT6plex [N-Term]; 1xDBIA [C10]	Q08211	DHX9_C777	2004.06	99	77.9	148.9	86.4	107.3	80.5
[R].LSLPMQETQLCSTDSPLPLEK.[E]	1xTMT6plex [K21]; 1xTMT6plex [N-Term]; 1xDBIA [C11]	Q08378	GOGA3_C136	3084.67	94.5	88.2	106.2	92	146.2	73
[K].ECSMSR.[V]	1xTMT6plex [N-Term]; 1xDBIA [C2]	Q08379	GOGA2_C427	1237.62	108.5	69.4	142.3	90.6	101.8	87.4
[K].EPEAAAPAPGTGGDSVCGETHR.[A]	1xTMT6plex [N-Term]; 1xDBIA [C17]	Q08379	GOGA2_C794	2634.28	76.8	88	113.3	83.6	159	79.4
[K].FGGQLLSFDIGDQPVFEIPLSNVSQCTTGK.[N]	1xTMT6plex [K30]; 1xTMT6plex [N-Term]; 1xDBIA [C26]	Q08945	SSRP1_C139	3952.09	111.3	85.4	131.9	91.1	104.3	76.1
[K].ADVIQATGDAICIFR.[E]	1xTMT6plex [N-Term]; 1xDBIA [C12]	Q08945	SSRP1_C200	2118.16	125.5	86.6	164.7	91.3	71.5	60.4
[K].ITVPGNFQGHSGAQCITCSYK.[A]	1xCarbamidomethyl [C15]; 1xTMT6plex [K21]; 1xTMT6plex [N-Term]; 1xDBIA [C18]	Q08945	SSRP1_C343	3022.56	82.7	106.1	153.1	108.3	69.4	80.3
[K].GLECSPSTPTMNSYFYK.[F]	1xTMT6plex [K17]; 1xTMT6plex [N-Term]; 1xDBIA [C4]	Q08AM6	VAC14_C516	2679.36	102.3	94.5	157.8	93.2	79.6	72.6
[R].CYLLVHQAK.[R]	1xTMT6plex [K9]; 1xTMT6plex [N-Term]; 1xDBIA [C1]	Q08J23	NSUN2_C221	1829.09	108	85.4	146.6	104.6	74.3	81.1
[R].MVYSTCSLNPIEDEAVIASLLEK.[S]	1xTMT6plex [K23]; 1xTMT6plex [N-Term]; 1xDBIA [C6]	Q08J23	NSUN2_C321	3279.76	92.4	71.5	120.1	97.5	124.9	93.6
[K].DGVCGPPPSKK.[M]	2xTMT6plex [K10; K11]; 1xTMT6plex [N-Term]; 1xDBIA [C4]	Q08J23	NSUN2_C502	2068.22	119.4	99.6	144.1	93.2	72.5	71.2
[K].KDGVCGPPPSK.[K]	2xTMT6plex [K1; K11]; 1xTMT6plex [N-Term]; 1xDBIA [C5]	Q08J23	NSUN2_C502	2068.22	114.3	94.1	147.5	95.3	76.7	72.1
[K].YEPDSANPDALQCPIVLCGWR.[G]	1xCarbamidomethyl [C18]; 1xTMT6plex [N-Term]; 1xDBIA [C13]	Q08J23	NSUN2_C673	2929.45	117.2	88.8	113.4	88	124.2	68.5
[R].AGEPNSPDAEEANSPDVTAGCDPAGVHPPR.[-]	1xTMT6plex [N-Term]; 1xDBIA [C21]	Q08J23	NSUN2_C758	3482.64	92.5	82.4	95.9	85.6	160.7	82.9
[K].EILHCLK.[N]	1xTMT6plex [K7]; 1xTMT6plex [N-Term]; 1xDBIA [C5]	Q08J23	NSUN2_C93	1609.99	119.5	109.3	144.3	94.8	70	62.3
[R].YMPQNPCIIATK.[T]	1xTMT6plex [K12]; 1xTMT6plex [N-Term]; 1xDBIA [C7]	Q09028	RBBP4_C138	2133.2	119.7	90.8	150.9	95.1	73.6	69.9
[K].SACSLESNLEGLAGVLEADLPNYK.[S]	1xTMT6plex [K24]; 1xTMT6plex [N-Term]; 1xDBIA [C3]	Q09161	NCBP1_C44	3247.73	110.4	90.7	121.9	93.3	109.1	74.6
[R].ILDIVPPTFSALCPANPTCIYK.[Y]	1xCarbamidomethyl [C13]; 1xTMT6plex [K22]; 1xTMT6plex [N-Term]; 1xDBIA [C19]	Q09161	NCBP1_C483	3187.77	123.9	80.1	156.3	86.9	79.6	73.2
[K].LSEVFEQEIDPVMQSLGYCCGR.[K]	1xCarbamidomethyl [C19]; 1xTMT6plex [N-Term]; 1xDBIA [C20]	Q09472	EP300_C1164	3085.5	129.8	101.7	135	87.4	73.6	72.5
[K].LEGDLTGPSVGVEVPDVELECPDAK.[L]	1xTMT6plex [K25]; 1xTMT6plex [N-Term]; 1xDBIA [C21]	Q09666	AHNK_C1900	3322.75	63	47.8	61.4	65.3	292.5	70
[R].DCPLNAEAASSK.[L]	1xTMT6plex [K12]; 1xTMT6plex [N-Term]; 1xDBIA [C2]	Q10567	AP1B1_C866	1960.06	117.7	90.1	143.3	96.6	78.4	73.9
[R].FCPTENVAK.[I]	1xTMT6plex [K9]; 1xTMT6plex [N-Term]; 1xDBIA [C2]	Q10713	MPPA_C225	1762.99	96.4	73.9	125.8	89	122.3	92.7
[R].KLPHELCTLIR.[N]	1xTMT6plex [K1]; 1xTMT6plex [N-Term]; 1xDBIA [C7]	Q10713	MPPA_C466	2077.27	95.3	78.1	126.8	92.5	126.3	81
[R].IVSCGNAIIAELLR.[L]	1xTMT6plex [N-Term]; 1xDBIA [C4]	Q12768	WASC5_C21	1997.18	109.2	92.5	139.7	98.4	88.8	71.4
[R].NHDGECTAAPTNR.[Q]	1xTMT6plex [N-Term]; 1xDBIA [C6]	Q12769	NU160_C1166	1910.93	96.7	65	115.7	100.2	149.8	72.7
[K].ALECFCQAASEVGK.[E]	1xCarbamidomethyl [C6]; 1xTMT6plex [K14]; 1xTMT6plex [N-Term]; 1xDBIA [C4]	Q12769	NU160_C929	2267.19	93.6	89	127.6	90.5	121.6	77.6
[R].RDPEACEK.[L]	1xTMT6plex [K8]; 1xTMT6plex [N-Term]; 1xDBIA [C6]	Q12788	TBL3_C696	1701.94	94.5	82	118.7	84.7	133.1	87.1
[R].LRPAAAPLEELTMGTSCLPDTFTK.[L]	1xTMT6plex [K24]; 1xTMT6plex [N-Term]; 1xDBIA [C17]	Q12789	TF3C1_C1704	3316.8	100.3	73.4	113.1	96.4	141.5	75.3
[R].VVDGHLNLPVCK.[G]	1xTMT6plex [K12]; 1xTMT6plex [N-Term]; 1xDBIA [C11]	Q12789	TF3C1_C1999	2048.21	100.5	93.9	159.8	99.5	75.5	70.8
[K].LREELGLCER.[T]	1xTMT6plex [N-Term]; 1xDBIA [C8]	Q12789	TF3C1_C286	1742.98	121.4	97.7	133.4	93.5	86.7	67.3
[R].LQEIHPECGPCK.[T]	1xCarbamidomethyl [C8]; 1xTMT6plex [K12]; 1xTMT6plex [N-Term]; 1xDBIA [C11]	Q12789	TF3C1_C320	2165.16	102.9	84.3	131.3	98.9	105.9	76.8
[R].VPPFPLPLEPCTQEFLWR.[A]	1xTMT6plex [N-Term]; 1xDBIA [C11]	Q12789	TF3C1_C42	2694.47	98	89.2	133.2	93.3	103.8	82.5
[K].YISCVFAEESDLSR.[Q]	1xTMT6plex [N-Term]; 1xDBIA [C4]	Q12789	TF3C1_C431	2144.09	110.4	94.8	174.9	87.6	71.1	61.3
[R].ACQSLASR.[D]	1xTMT6plex [N-Term]; 1xDBIA [C2]	Q12789	TF3C1_C544	1360.76	116.1	88	173.2	98.9	53.3	70.5
[R].DSLLDTSSVSEPNVSFVSHCADSNSGDIAVIEEVR.[M]	1xTMT6plex [N-Term]; 1xDBIA [C20]	Q12789	TF3C1_C570	4204.06	83.3	75	112.4	91.6	143.9	93.8
[R].AGVRPSSSGSAWEACSEAPSK.[G]	1xTMT6plex [K21]; 1xTMT6plex [N-Term]; 1xDBIA [C15]	Q12789	TF3C1_C853	2818.46	95.8	89.1	113.3	100.2	123.1	78.5
[K].IAQLFSISPCQISQIYK.[Q]	1xTMT6plex [K17]; 1xTMT6plex [N-Term]; 1xDBIA [C10]	Q12800	TFCP2_C453	2693.55	115	88.9	137.7	96.7	89.9	71.6
[K].ILPFQYVLCAATSPAVK.[L]	1xTMT6plex [K17]; 1xTMT6plex [N-Term]; 1xDBIA [C9]	Q12800	TFCP2_C72	2575.51	105.2	97	125.5	89.9	103.3	79.1
[R].DLCQVSHPHTK.[L]	1xTMT6plex [K11]; 1xTMT6plex [N-Term]; 1xDBIA [C3]	Q12802	AKP13_C2685	2019.12	118.7	96.1	166.8	104.1	53	61.2
[R].TFPLCFDDHDPAVIHENASQPEVLVPIR.[L]	1xTMT6plex [N-Term]; 1xDBIA [C5]	Q12824	SNF5_C167	3684.9	97.3	82.9	87.6	89	160	83.3
[K].LASADDIGTLICK.[N]	1xTMT6plex [K13]; 1xTMT6plex [N-Term]; 1xDBIA [C12]	Q12830	BPTF_C1357	2074.2	97	81.5	126.7	96.8	117.5	80.6
[K].AVAWCPWQSNVLATGGGTSDR.[H]	1xTMT6plex [N-Term]; 1xDBIA [C5]	Q12834	CDC20_C364	2701.37	124	78.9	165.7	107.6	59	64.8
[R].GLCVDALIELSDENADWK.[L]	1xTMT6plex [K18]; 1xTMT6plex [N-Term]; 1xDBIA [C3]	Q12841	FSTL1_C197	2745.45	120.5	99.1	156.4	97.4	73.7	52.9
[R].YIELFLNSCPK.[G]	1xTMT6plex [K11]; 1xTMT6plex [N-Term]; 1xDBIA [C9]	Q12849	GRSF1_C476	2081.19	92.8	75.7	132.7	91.2	127.1	80.5
[R].KHPNEICVPMSVEFEELLK.[A]	2xTMT6plex [K1; K19]; 1xTMT6plex [N-Term]; 1xDBIA [C7]	Q12874	SF3A3_C103	3225.8	93.8	68.3	97.7	76.5	174.1	89.7
[R].YLDLHDCYLK.[Y]	1xTMT6plex [K10]; 1xTMT6plex [N-Term]; 1xDBIA [C7]	Q12874	SF3A3_C145	2037.12	99.6	84.4	152.4	90	93.8	79.8
[K].CGGTLEER.[A]	1xTMT6plex [N-Term]; 1xDBIA [C1]	Q12874	SF3A3_C274	1389.74	107.7	83.8	158.6	80.5	89.8	79.5
[R].CLGIPNTAHFANVTQIEDAVSLWAK.[L]	1xTMT6plex [K25]; 1xTMT6plex [N-Term]; 1xDBIA [C1]	Q12874	SF3A3_C437	3452.88	103.8	79.3	136.8	95.7	101.8	82.6
[K].VADPVDSSNLDTCGSISQVIEQLPQPNR.[T]	1xTMT6plex [N-Term]; 1xDBIA [C13]	Q12888	TP53B_C101	3507.8	92.4	73.3	109.4	92.1	160.3	72.5
[K].TMSVLSCICEAR.[Q]	1xCarbamidomethyl [C7]; 1xTMT6plex [N-Term]; 1xDBIA [C9]	Q12888	TP53B_C1040	1894.98	123.3	69.8	105.5	105.6	111.7	84.1
[K].ALIERPSQNNIGIQTMECSLR.[V]	1xTMT6plex [N-Term]; 1xDBIA [C18]	Q12888	TP53B_C1159	2898.55	108.3	84.8	138.6	94	100.9	73.4
[K].NVCEQGTSTVDQNFGK.[Q]	1xTMT6plex [K16]; 1xTMT6plex [N-Term]; 1xDBIA [C3]	Q12888	TP53B_C1178	2481.28	101.8	77.4	137.2	92.3	108.5	82.8
[K].DIALGVFDVVVTDPSCPASVLK.[C]	1xTMT6plex [K22]; 1xTMT6plex [N-Term]; 1xDBIA [C16]	Q12888	TP53B_C1926	2999.69	87.4	89.3	88.4	80.7	168.6	85.6
[K].NSPEDLGLSLTGDSCK.[L]	1xTMT6plex [K16]; 1xTMT6plex [N-Term]; 1xDBIA [C15]	Q12888	TP53B_C513	2390.26	100.2	79.4	141.9	85.4	113.6	79.5
[K].GDDTDTRDDISILATGCK.[G]	1xTMT6plex [K18]; 1xTMT6plex [N-Term]; 1xDBIA [C17]	Q12888	TP53B_C604	2650.38	89.7	85	130.3	84.1	129.8	81.1
[K].GDLDLELVLLCK.[E]	1xTMT6plex [K12]; 1xTMT6plex [N-Term]; 1xDBIA [C11]	Q12906	ILF3_C116	2085.24	93	82.6	130.4	83.1	134.1	76.8
[K].CLAALASLR.[H]	1xTMT6plex [N-Term]; 1xDBIA [C1]	Q12906	ILF3_C203	1442.87	96.9	73.9	152.5	112.4	89.6	74.6
[R].EVESLPAVCPSDGCTWK.[G]	1xCarbamidomethyl [C9]; 1xTMT6plex [K17]; 1xTMT6plex [N-Term]; 1xDBIA [C14]	Q12933	TRAF2_C112	2632.35	110.3	91.7	172.8	94.6	63.4	67.2
[R].APCCGADVK.[A]	1xCarbamidomethyl [C4]; 1xTMT6plex [K9]; 1xTMT6plex [N-Term]; 1xDBIA [C3]	Q12933	TRAF2_C170	1674.91	107.4	96.5	171.2	100.6	59.5	64.7
[K].TATFENIVCVLNR.[E]	1xTMT6plex [N-Term]; 1xDBIA [C9]	Q12933	TRAF2_C287	2005.11	117.2	93.3	152.3	102.4	66	68.8
[K].LLAVNNVCLEEVTHEEAVTALK.[N]	1xTMT6plex [K22]; 1xTMT6plex [N-Term]; 1xDBIA [C8]	Q12959	DLG1_C378	3149.76	70.8	66.7	91.9	88.3	200.5	82
[K].FISDIANDALQHCK.[M]	1xTMT6plex [K14]; 1xTMT6plex [N-Term]; 1xDBIA [C13]	Q12962	TAF10_C174	2329.27	98.5	111.3	126.4	96.7	92	75
[K].STCDSENLAVINK.[S]	1xTMT6plex [K13]; 1xTMT6plex [N-Term]; 1xDBIA [C3]	Q12986	NFX1_C295	2148.17	107.1	99.2	133.6	100.7	80.8	78.6
[R].GCVNPMINIEQLWR.[D]	1xTMT6plex [N-Term]; 1xDBIA [C2]	Q12996	CSTF3_C176	2198.18	107.8	96.6	142.4	92.5	81.4	79.3
[K].ESHSVQPTCSAVK.[K]	1xTMT6plex [K13]; 1xTMT6plex [N-Term]; 1xDBIA [C9]	Q13029	PRDM2_C875	2127.16	98.4	89.2	121.8	92.3	120.9	77.3
[K].LPCICTYNGDK.[K]	1xCarbamidomethyl [C5]; 1xTMT6plex [K11]; 1xTMT6plex [N-Term]; 1xDBIA [C3]	Q13033	STRN3_C621	2038.09	108.2	86.4	154.8	101.5	81.8	67.3
[K].LCNEEQELLR.[F]	1xTMT6plex [N-Term]; 1xDBIA [C2]	Q13042	CDC16_C194	1771.96	96.3	87.3	156	99.8	96.9	63.6
[K].CYDFDVHTMK.[T]	1xTMT6plex [K10]; 1xTMT6plex [N-Term]; 1xDBIA [C1]	Q13042	CDC16_C544	2013.03	115.7	84.6	141.6	95	76.2	87
[K].LDDLSVLDLSHNQLTECPR.[E]	1xTMT6plex [N-Term]; 1xDBIA [C17]	Q13045	FLII_C119	2693.41	108.3	92.7	119.8	104.5	99.7	75
[R].CFHAWSAFCK.[A]	1xCarbamidomethyl [C1]; 1xTMT6plex [K10]; 1xTMT6plex [N-Term]; 1xDBIA [C9]	Q13045	FLII_C1265	2011.04	109.3	87.4	136.4	101.4	82.2	83.3
[R].VPECLYTLPSLR.[R]	1xTMT6plex [N-Term]; 1xDBIA [C4]	Q13045	FLII_C241	1916.09	115.2	112.1	133.8	90.6	71.1	77.2
[K].LTNLEEFMAANNNLELVPESLCR.[C]	1xTMT6plex [N-Term]; 1xDBIA [C22]	Q13045	FLII_C337	3145.62	124.6	95.5	151.4	91.3	75.3	61.9
[R].TGLCYLPEELAALQK.[L]	1xTMT6plex [K15]; 1xTMT6plex [N-Term]; 1xDBIA [C4]	Q13045	FLII_C46	2403.37	116.8	85.8	130	110.1	80.1	77.2
[R].LQFIADHCPTLR.[V]	1xTMT6plex [N-Term]; 1xDBIA [C8]	Q13098	CSN1_C67	1939.08	117.1	102.3	118.3	89.2	96.6	76.5
[K].LAFPGETLSDIPCK.[T]	1xTMT6plex [K14]; 1xTMT6plex [N-Term]; 1xDBIA [C13]	Q13111	CAF1A_C181	2245.27	111.7	88.4	134.4	98.5	92.1	74.9
[K].TEEEGVGCGGAGR.[R]	1xTMT6plex [N-Term]; 1xDBIA [C8]	Q13111	CAF1A_C190	1746.86	120.3	95.6	140.9	102.1	76	65
[K].TLAGSCGK.[F]	1xTMT6plex [K8]; 1xTMT6plex [N-Term]; 1xDBIA [C6]	Q13111	CAF1A_C465	1490.88	110.8	76.6	152.1	93.7	86.6	80.3
[R].LSFTPDGSLLLTPAGCVESGENVMNTTYVFSR.[K]	1xTMT6plex [N-Term]; 1xDBIA [C16]	Q13112	CAF1B_C255	3930.98	94.7	86.1	126	84	117.9	91.3
[K].RPIAHLPCPGK.[A]	1xTMT6plex [K11]; 1xTMT6plex [N-Term]; 1xDBIA [C8]	Q13112	CAF1B_C283	1943.18	106.4	85.1	138.3	92	96.7	81.5
[K].ADCPTMEAQTTLTTNDIVISK.[L]	1xTMT6plex [K21]; 1xTMT6plex [N-Term]; 1xDBIA [C3]	Q13123	RED_C263	3006.59	96.2	77.8	128.8	73	152.2	71.9
[R].GVCHIPMAEPFCPK.[T]	1xCarbamidomethyl [C12]; 1xTMT6plex [K14]; 1xTMT6plex [N-Term]; 1xDBIA [C3]	Q13126	MTAP_C136	2340.24	117.3	103.8	145.9	90.5	78.5	63.9
[K].RPCTEDTMLELLLR.[L]	1xTMT6plex [N-Term]; 1xDBIA [C3]	Q13129	RLF_C1055	2215.21	113.2	86.1	126.1	90.4	109.1	75.1
[K].GCIESSSVFDADTLLYR.[G]	1xTMT6plex [N-Term]; 1xDBIA [C2]	Q13129	RLF_C1654	2401.23	102.2	96.4	117.5	105.5	94.6	83.9
[R].AFAFVTFADDQIAQSLCGEDLIIK.[G]	1xTMT6plex [K24]; 1xTMT6plex [N-Term]; 1xDBIA [C17]	Q13148	TADBP_C244	3369.82	86.6	81.1	94.7	94	160.1	83.4
[R].VTEDENDEPIEIPSEDDGTVLLSTVTAQFPGACGLR.[Y]	1xTMT6plex [N-Term]; 1xDBIA [C33]	Q13148	TADBP_C39	4343.14	103.1	85.6	128.1	96.4	108.5	78.3
[R].YRNPVSQCMR.[G]	1xTMT6plex [N-Term]; 1xDBIA [C8]	Q13148	TADBP_C50	1778.94	88.3	112.3	103.8	100.3	94.9	100.4
[R].VELPTCMYR.[L]	1xTMT6plex [N-Term]; 1xDBIA [C6]	Q13155	AIMP2_C23	1636.88	138.4	98.7	156.6	90.3	57.4	58.7
[R].SCENLAPFNTALK.[L]	1xTMT6plex [K13]; 1xTMT6plex [N-Term]; 1xDBIA [C2]	Q13155	AIMP2_C306	2162.2	129.4	91.3	177.7	86.5	48.1	67
[R].RVDDFEAGAAAGAAPGEEDLCAAFNVICDNVGK.[D]	1xCarbamidomethyl [C28]; 1xTMT6plex [K33]; 1xTMT6plex [N-Term]; 1xDBIA [C21]	Q13158	FADD_C98	4107.03	90	91.5	129.8	98.5	118.9	71.2
[R].EEECHFYAGGQVYPGEASR.[V]	1xTMT6plex [N-Term]; 1xDBIA [C4]	Q13162	PRDX4_C51	2654.25	144.3	108.5	182.2	92.9	37.7	34.4
[R].TREEECHFYAGGQVYPGEASR.[V]	1xTMT6plex [N-Term]; 1xDBIA [C6]	Q13162	PRDX4_C51	2911.4	147.1	95.5	187	91.3	41.2	37.9
[K].LCDFGVSTQLVNSIAK.[T]	1xTMT6plex [K16]; 1xTMT6plex [N-Term]; 1xDBIA [C2]	Q13163	MP2K5_C300	2449.39	112.3	79.7	147.1	106.8	70.9	83.1
[R].LTWHSCPEDEAQ.[-]	1xTMT6plex [N-Term]; 1xDBIA [C6]	Q13185	CBX3_C177	1940.94	101.3	90	118.6	86.9	129.6	73.5
[K].GFTDADNTWEPEENLDCPELIEAFLNSQK.[A]	1xTMT6plex [K29]; 1xTMT6plex [N-Term]; 1xDBIA [C17]	Q13185	CBX3_C69	4079.99	36.1	35.7	32.7	41.7	401.9	51.7
[R].DVFGTNQLVGCR.[L]	1xTMT6plex [N-Term]; 1xDBIA [C11]	Q13191	CBLB_C607	1833.98	123.2	108.7	115.9	115.3	60.9	76
[K].GTLTLCPYHSDR.[Q]	1xTMT6plex [N-Term]; 1xDBIA [C6]	Q13200	PSMD2_C779	1887.99	106.5	92.3	138	88.5	96.4	78.2
[R].ADELLCWEDSAGHWLYE.[-]	1xTMT6plex [N-Term]; 1xDBIA [C6]	Q13232	NDK3_C158	2562.22	120.7	93.4	126.8	78.1	120.8	60.1
[R].NGYDYGQCR.[L]	1xTMT6plex [N-Term]; 1xDBIA [C8]	Q13242	SRSF9_C80	1600.77	120.9	76.1	131.4	95.9	103	72.6
[R].TVYCNVHK.[H]	1xTMT6plex [K8]; 1xTMT6plex [N-Term]; 1xDBIA [C4]	Q13263	TIF1B_C209	1717.98	115.9	95	154.1	94.6	69.9	70.6
[R].DCQLNAHK.[D]	1xTMT6plex [K8]; 1xTMT6plex [N-Term]; 1xDBIA [C2]	Q13263	TIF1B_C232	1682.94	124.2	89.7	161.9	91.9	64	68.3
[R].STAPSAAASASASAAASSPAGGGAEALELLEHCGVCR.[E]	1xCarbamidomethyl [C33]; 1xTMT6plex [N-Term]; 1xDBIA [C36]	Q13263	TIF1B_C68	3910.92	106.4	94.8	112.2	99.1	110.5	76.9
[K].VMSQNFTNCHTK.[I]	1xTMT6plex [K12]; 1xTMT6plex [N-Term]; 1xDBIA [C9]	Q13283	G3BP1_C73	2164.14	101.8	94.2	132.7	100.1	88.9	82.3
[R].LAMDFGGAGAAQQGLTDSCQSGGVPTAVQNLAPR.[A]	1xTMT6plex [N-Term]; 1xDBIA [C19]	Q13310	PABP4_C494	3813.92	100.4	86.3	157.2	107.2	69.4	79.4
[R].SGVLEWCTGTVPIGEFLVNNEDGAHK.[R]	1xTMT6plex [K26]; 1xTMT6plex [N-Term]; 1xDBIA [C7]	Q13315	ATM_C2770	3526.84	99.1	91.8	163.8	92.6	76.9	75.7
[K].IDPENAEFLTALCELR.[L]	1xTMT6plex [N-Term]; 1xDBIA [C13]	Q13325	IFIT5_C476	2359.25	114.4	90.2	131.7	101.2	92.9	69.6
[R].ALDCSSSVR.[Q]	1xTMT6plex [N-Term]; 1xDBIA [C4]	Q13330	MTA1_C229	1462.79	100.7	90.6	138.6	86.4	112.8	71
[K].IPCNDSK.[I]	1xTMT6plex [K7]; 1xTMT6plex [N-Term]; 1xDBIA [C3]	Q13347	EIF3I_C144	1530.87	121.4	103.7	148.5	89.6	70.7	66
[K].HVLTGSADNSCR.[L]	1xTMT6plex [N-Term]; 1xDBIA [C11]	Q13347	EIF3I_C76	1784.93	120.9	88.7	150.2	81.8	79.7	78.8
[K].MYITCAEYTHFYGGK.[K]	1xTMT6plex [K15]; 1xTMT6plex [N-Term]; 1xDBIA [C5]	Q13356	PPIL2_C15	2538.29	118.1	94.3	158	95.3	69.2	65
[K].AVAVTSMSFPVGDVNNFVVGSEEGSVYTACR.[H]	1xTMT6plex [N-Term]; 1xDBIA [C30]	Q13409	DC1I2_C460	3717.85	118.2	100.3	148.4	90.8	77.8	64.5
[R].DFNEECPR.[L]	1xTMT6plex [N-Term]; 1xDBIA [C6]	Q13418	ILK_C239	1534.75	115.6	103.1	145.7	98.4	73.5	63.6
[K].FSFQCPGR.[M]	1xTMT6plex [N-Term]; 1xDBIA [C5]	Q13418	ILK_C346	1466.78	123.9	101.4	166.7	82.2	60	65.9
[K].DLLLYDCMPWTR.[D]	1xTMT6plex [N-Term]; 1xDBIA [C7]	Q13425	SNTB2_C362	2051.07	102.7	80.4	154.2	87	101.8	73.9
[R].DAWASPCHSYPLVATR.[L]	1xTMT6plex [N-Term]; 1xDBIA [C7]	Q13425	SNTB2_C374	2299.19	92.5	75.9	155.8	83.7	109.7	82.4
[R].LVHSGSGCR.[S]	1xTMT6plex [N-Term]; 1xDBIA [C8]	Q13425	SNTB2_C391	1440.79	99.4	83.3	163.2	98.6	78.7	76.7
[R].ELICYCLDTIAENQAK.[N]	1xCarbamidomethyl [C6]; 1xTMT6plex [K16]; 1xTMT6plex [N-Term]; 1xDBIA [C4]	Q13426	XRCC4_C128	2638.4	120.2	91.3	149.5	100.1	69.1	69.7
[R].ERECNPPNSQPASYQR.[R]	1xTMT6plex [N-Term]; 1xDBIA [C4]	Q13427	PPIG_C310	2401.19	87.8	86.7	128.2	92.4	120.3	84.6
[R].VVFELFSDVCPK.[T]	1xTMT6plex [K12]; 1xTMT6plex [N-Term]; 1xDBIA [C10]	Q13427	PPIG_C33	2137.21	99.5	72.7	123.9	84.7	135.6	83.6
[K].GAGNPQASTLALQSNITQCLLGQPWPLNEAQVQASVVK.[V]	1xTMT6plex [K38]; 1xTMT6plex [N-Term]; 1xDBIA [C19]	Q13428	TCOF_C1298	4686.54	99	87.7	125.9	86.1	122.7	78.5
[K].CFLAQPVTLLDIYTHWQQTSELGR.[K]	1xTMT6plex [N-Term]; 1xDBIA [C1]	Q13428	TCOF_C38	3344.77	109.1	67.6	160.9	97.5	82.5	82.4
[K].ALLDGMGSCLFER.[L]	1xTMT6plex [N-Term]; 1xDBIA [C9]	Q13444	ADA15_C409	1937.02	123.3	86.7	158.5	86.9	81.7	62.9
[K].KEDLICPCK.[V]	1xCarbamidomethyl [C8]; 2xTMT6plex [K1; K9]; 1xTMT6plex [N-Term]; 1xDBIA [C6]	Q13464	ROCK1_C1281	2089.21	119.2	99.3	146.3	101.5	66.9	66.8
[K].SSSQPSSCCSDPSKPGGNVEGATQSLAEQMR.[K]	1xCarbamidomethyl [C8]; 1xTMT6plex [K14]; 1xTMT6plex [N-Term]; 1xDBIA [C9]	Q13501	SQSTM_C290	3936.89	119.2	100.4	126	99	97	58.4
[K].DLLADLIGCQR.[L]	1xTMT6plex [N-Term]; 1xDBIA [C9]	Q13523	PRP4B_C962	1741.98	100.5	73.7	147.5	91.1	111.2	76.1
[K].SGEEDFESLASQFSDCSSAK.[A]	1xTMT6plex [K20]; 1xTMT6plex [N-Term]; 1xDBIA [C16]	Q13526	PIN1_C113	2878.38	113.2	108.7	135.5	86.3	83.7	72.6
[R].LGCFNLTIK.[G]	1xTMT6plex [K9]; 1xTMT6plex [N-Term]; 1xDBIA [C3]	Q13547	HDAC1_C273	1763.07	102.3	94.4	145.2	98.1	81.5	78.4
[K].HPWVCQR.[S]	1xTMT6plex [N-Term]; 1xDBIA [C5]	Q13555	KCC2G_C273	1450.79	131.3	108.6	111.9	86.2	85	77.1
[K].IPPCISNWK.[N]	1xTMT6plex [K9]; 1xTMT6plex [N-Term]; 1xDBIA [C4]	Q13573	SNW1_C250	1812.06	117.3	97.3	157.7	94.6	65.4	67.6
[R].ANPDPNTCLGVFGLSLYTTER.[D]	1xTMT6plex [N-Term]; 1xDBIA [C8]	Q13595	TRA2A_C120	2793.44	96	74.5	120	81.5	153.5	74.5
[K].LQEVECEEQR.[L]	1xTMT6plex [N-Term]; 1xDBIA [C6]	Q13596	SNX1_C318	1787.92	95.8	72.5	90.1	92.1	166	83.6
[K].DVMYICPFMGAVSGTLTVTDFK.[L]	1xTMT6plex [K22]; 1xTMT6plex [N-Term]; 1xDBIA [C6]	Q13613	MTMR1_C117	3149.65	124	102.7	115.7	99.3	94.9	63.4
[K].IGAQSHGDNSCGIEIVCK.[D]	1xCarbamidomethyl [C17]; 1xTMT6plex [K18]; 1xTMT6plex [N-Term]; 1xDBIA [C11]	Q13613	MTMR1_C170	2642.38	112.9	83.5	142.2	101	87.5	73
[K].FDCHYCR.[D]	1xCarbamidomethyl [C3]; 1xTMT6plex [N-Term]; 1xDBIA [C6]	Q13642	FHL1_C10	1525.72	118.6	91.1	181.1	96.6	53.4	59.2
[K].GEDFYCVTCHETK.[F]	1xCarbamidomethyl [C9]; 1xTMT6plex [K13]; 1xTMT6plex [N-Term]; 1xDBIA [C6]	Q13642	FHL1_C150	2343.15	100.6	109	144.4	99.3	81.3	65.4
[K].VFCVQRPDR.[-]	1xTMT6plex [N-Term]; 1xDBIA [C3]	Q13685	AAMP_C428	1644.92	118.6	95.4	147	98.6	64.7	75.7
[K].ELCGPWPSHQLLTNQLQR.[L]	1xTMT6plex [N-Term]; 1xDBIA [C3]	Q13769	THOC5_C613	2645.42	96.6	83	128.5	98.1	114.6	79.3
[R].ACNFFNNVGGNLK.[G]	1xTMT6plex [K13]; 1xTMT6plex [N-Term]; 1xDBIA [C2]	Q13772	NCOA4_C244	2152.17	120.5	93.8	170.3	95.9	53.8	65.8
[K].VVTSEALCGVPVLVLANK.[Q]	1xTMT6plex [K18]; 1xTMT6plex [N-Term]; 1xDBIA [C8]	Q13795	ARFRP_C125	2566.54	104.4	97.4	127.7	91.4	103.6	75.5
[R].GACAGSEDAVK.[A]	1xTMT6plex [K11]; 1xTMT6plex [N-Term]; 1xDBIA [C3]	Q13813	SPTN1_C1622	1761.96	88.7	90.1	141.7	84.8	107.8	86.8
[K].ALCAEADRLQQSHPLSATQIQVK.[R]	1xTMT6plex [K23]; 1xTMT6plex [N-Term]; 1xDBIA [C3]	Q13813	SPTN1_C315	3261.81	83.4	82.2	135.7	93.6	112.7	92.5
[R].EQAQSCR.[Q]	1xTMT6plex [N-Term]; 1xDBIA [C6]	Q13813	SPTN1_C956	1346.7	106.9	76.6	156.2	106.8	82.1	71.4
[K].VCNVAPIAGETK.[V]	1xTMT6plex [K12]; 1xTMT6plex [N-Term]; 1xDBIA [C2]	Q13823	NOG2_C336	1956.14	107.4	80.2	134.4	91.9	108.3	77.7
[K].EETEENSHCDANTEMQQILTR.[V]	1xTMT6plex [N-Term]; 1xDBIA [C9]	Q13823	NOG2_C516	3003.4	67.1	56.7	83.2	73.4	249.6	70
[K].NCPHIVVGTPGR.[I]	1xTMT6plex [N-Term]; 1xDBIA [C2]	Q13838	DX39B_C165	1774.99	102.4	90.6	138.8	96.4	90	81.8
[K].EIRPVCR.[K]	1xTMT6plex [N-Term]; 1xDBIA [C6]	Q13838	DX39B_C239	1397.82	94.2	82.4	161.9	99.7	86.9	74.9
[K].YCELPVECK.[I]	1xCarbamidomethyl [C8]; 1xTMT6plex [K9]; 1xTMT6plex [N-Term]; 1xDBIA [C2]	Q13888	TF2H2_C299	1895.02	112.2	91.3	164.9	94.6	65	72
[K].GILIPLCESGTCTLR.[E]	1xCarbamidomethyl [C7]; 1xTMT6plex [N-Term]; 1xDBIA [C12]	Q13895	BYST_C300	2158.19	111.5	90.6	122	89.5	103.7	82.6
[R].CEMPELVQHK.[L]	1xTMT6plex [K10]; 1xTMT6plex [N-Term]; 1xDBIA [C1]	Q14008	CKAP5_C1500	1968.08	120.4	96.1	161.3	100.1	55.6	66.6
[K].TLLHTLCK.[L]	1xTMT6plex [K8]; 1xTMT6plex [N-Term]; 1xDBIA [C7]	Q14008	CKAP5_C1768	1683.04	135.5	100.2	171.5	97.5	41.6	53.8
[K].NESELEAHLCR.[M]	1xTMT6plex [N-Term]; 1xDBIA [C10]	Q14008	CKAP5_C1795	1825.94	105.1	93.8	172.1	99.5	66.9	62.6
[K].ASAVLPPTCIQLLDSSNWK.[E]	1xTMT6plex [K19]; 1xTMT6plex [N-Term]; 1xDBIA [C9]	Q14008	CKAP5_C604	2797.57	120.4	102.1	144.3	96.6	72	64.7
[K].AVELMDRTEMPCQALVR.[M]	1xTMT6plex [N-Term]; 1xDBIA [C12]	Q14008	CKAP5_C637	2487.31	108.4	97.2	159.3	91.1	69.7	74.3
[R].GFCFITFKEEEPVK.[K]	2xTMT6plex [K8; K14]; 1xTMT6plex [N-Term]; 1xDBIA [C3]	Q14103	HNRPD_C226	2657.5	112.1	76.1	151.6	85.4	91.8	83
[R].GFCFITFK.[E]	1xTMT6plex [K8]; 1xTMT6plex [N-Term]; 1xDBIA [C3]	Q14103	HNRPD_C226	1716.99	101.2	83.2	139	86.2	117.8	72.6
[K].TCMSEETSNQK.[Q]	1xTMT6plex [K11]; 1xTMT6plex [N-Term]; 1xDBIA [C2]	Q14119	VEZF1_C327	2012.02	104.5	86.3	134.9	102	89.7	82.6
[K].KTTEEQVQASTPCPR.[T]	1xTMT6plex [K1]; 1xTMT6plex [N-Term]; 1xDBIA [C13]	Q14137	BOP1_C108	2429.32	105.6	81.3	153.3	102.5	85.9	71.4
[K].TTEEQVQASTPCPR.[T]	1xTMT6plex [N-Term]; 1xDBIA [C12]	Q14137	BOP1_C108	2072.06	100.7	82.4	112.6	97.9	121.8	84.6
[R].DLQPFPTCQALVYR.[G]	1xTMT6plex [N-Term]; 1xDBIA [C8]	Q14137	BOP1_C404	2176.18	101.9	83	140.1	94.4	105.3	75.2
[R].LLTFNPTYCALK.[E]	1xTMT6plex [K12]; 1xTMT6plex [N-Term]; 1xDBIA [C9]	Q14139	UBE4A_C465	2138.24	103.6	90.5	145.1	97.4	77.1	86.2
[R].SQQEICEQLNINHMIQR.[I]	1xTMT6plex [N-Term]; 1xDBIA [C6]	Q14139	UBE4A_C79	2609.35	92.4	78	114.2	87.7	145.3	82.4
[R].QVGEGCR.[T]	1xTMT6plex [N-Term]; 1xDBIA [C6]	Q14141	SEPT6_C14	1273.69	106.1	97.4	160.8	82.7	73.2	79.9
[R].ACPQIVTALTLLNR.[E]	1xTMT6plex [N-Term]; 1xDBIA [C2]	Q14146	URB2_C1294	2038.2	92.6	79.3	124.6	91.5	116.6	95.5
[R].AFGDVTAHLLQPCLVLR.[H]	1xTMT6plex [N-Term]; 1xDBIA [C13]	Q14146	URB2_C205	2378.36	115.8	71	137.9	74.3	122	79
[K].GGYAVTDFLTYNCLTNDTDLYSDCLR.[T]	1xCarbamidomethyl [C13]; 1xTMT6plex [N-Term]; 1xDBIA [C24]	Q14147	DHX34_C1062	3515.67	108.7	89.9	152.1	89.5	93.4	66.5
[K].SADDAGCQLQELR.[N]	1xTMT6plex [N-Term]; 1xDBIA [C7]	Q14149	MORC3_C694	1930.99	107.4	92.1	140.3	86.4	93.5	80.5
[R].LQLECQR.[Q]	1xTMT6plex [N-Term]; 1xDBIA [C5]	Q14151	SAFB2_C672	1414.8	115.7	86.6	121.7	103.4	91.2	81.4
[R].ERLQLECQR.[Q]	1xTMT6plex [N-Term]; 1xDBIA [C7]	Q14151	SAFB2_C672	1699.95	90.8	89.5	131.6	95.3	99.9	92.9
[R].SLEPSPSPGPQEEDGEVALVLLGRPSPGAVGPEDVALCSSR.[R]	1xTMT6plex [N-Term]; 1xDBIA [C38]	Q14160	SCRIB_C1612	4624.38	88.8	84.9	130.2	106.5	125.8	63.8
[R].HVACLAR.[S]	1xTMT6plex [N-Term]; 1xDBIA [C4]	Q14160	SCRIB_C864	1294.76	104.2	82.2	146	101.1	87	79.5
[K].LSQERPGVLLNQFPCENLLTVK.[D]	1xTMT6plex [K22]; 1xTMT6plex [N-Term]; 1xDBIA [C15]	Q14166	TTL12_C361	3252.85	117.7	97.1	131.1	99.1	83	71.9
[K].QVHCEEFIPEFEK.[Q]	1xTMT6plex [K13]; 1xTMT6plex [N-Term]; 1xDBIA [C4]	Q14166	TTL12_C528	2389.26	110.5	95.7	117.8	97.6	104.6	73.8
[R].AFTELFQVACAKPPPLGLCDYPSSR.[A]	1xCarbamidomethyl [C10]; 1xTMT6plex [K12]; 1xTMT6plex [N-Term]; 1xDBIA [C19]	Q14166	TTL12_C572	3521.87	121.4	100.5	119.3	96.4	86.1	76.4
[R].VMQPQILEVNFNPDCER.[A]	1xTMT6plex [N-Term]; 1xDBIA [C15]	Q14166	TTL12_C612	2557.31	119.8	87.3	138	93.6	91.2	70.2
[R].EVLTCK.[I]	1xTMT6plex [K6]; 1xTMT6plex [N-Term]; 1xDBIA [C5]	Q14181	DPOA2_C222	1446.88	118.3	100.4	149.5	98.4	63.2	70.3
[K].HEQVENCLLTSPFEDIFK.[Q]	1xTMT6plex [K18]; 1xTMT6plex [N-Term]; 1xDBIA [C7]	Q14181	DPOA2_C392	2903.54	105.7	81.9	121.3	99.9	106.5	84.6
[R].KCPEWMNVQNK.[R]	2xTMT6plex [K1; K11]; 1xTMT6plex [N-Term]; 1xDBIA [C2]	Q14191	WRN_C15	2360.32	127.7	107.5	163.6	98.7	48.1	54.4
[R].AITIASQTNCPLYVTK.[V]	1xTMT6plex [K16]; 1xTMT6plex [N-Term]; 1xDBIA [C10]	Q14195	DPYL3_C248	2477.42	119.2	93.8	147.4	97.4	68.7	73.5
[R].LVLSESCSR.[D]	1xTMT6plex [N-Term]; 1xDBIA [C7]	Q14202	ZMYM3_C1048	1518.85	112.7	90.2	156.2	102.4	71.2	67.3
[R].DSMSSQPSCTGLNYSYGVNAWK.[C]	1xTMT6plex [K22]; 1xTMT6plex [N-Term]; 1xDBIA [C9]	Q14202	ZMYM3_C1059	3149.54	112.4	83.6	131.8	103.3	90.2	78.8
[K].CWVQSK.[Y]	1xTMT6plex [K6]; 1xTMT6plex [N-Term]; 1xDBIA [C1]	Q14202	ZMYM3_C1073	1504.87	104	85.4	160.1	102.3	73.5	74.8
[R].VEEEHLWECK.[Q]	1xTMT6plex [K10]; 1xTMT6plex [N-Term]; 1xDBIA [C9]	Q14202	ZMYM3_C1197	2056.09	98	81.7	145.6	91.4	100.8	82.5
[R].SCIAESPLWYSVIPMDR.[S]	1xTMT6plex [N-Term]; 1xDBIA [C2]	Q14202	ZMYM3_C1326	2492.29	108	79	150.4	94.2	88.6	79.8
[K].GLPQLFCSSSCLTTFSK.[K]	1xCarbamidomethyl [C11]; 1xTMT6plex [K17]; 1xTMT6plex [N-Term]; 1xDBIA [C7]	Q14202	ZMYM3_C335	2630.41	91.8	95.4	128.5	94.8	112.1	77.4
[R].SLSDPCYYNK.[V]	1xTMT6plex [K10]; 1xTMT6plex [N-Term]; 1xDBIA [C6]	Q14202	ZMYM3_C557	1944.03	102.3	79.3	149	99	89.5	80.8
[K].FELSENCSERPGLR.[G]	1xTMT6plex [N-Term]; 1xDBIA [C7]	Q14203	DCTN1_C636	2162.12	123.7	99.5	129.4	93.2	83.1	71.2
[K].ASEQIYGTPSSSPYECLR.[Q]	1xTMT6plex [N-Term]; 1xDBIA [C16]	Q14203	DCTN1_C888	2513.25	112.4	96.8	150.1	95.3	77	68.3
[K].TSAPITCELLNK.[Q]	1xTMT6plex [K12]; 1xTMT6plex [N-Term]; 1xDBIA [C7]	Q14204	DYHC1_C1999	2044.19	115.5	99.7	134.5	102.2	73.5	74.6
[R].CVLNWFGDWSTEALYQVGK.[E]	1xTMT6plex [K19]; 1xTMT6plex [N-Term]; 1xDBIA [C1]	Q14204	DYHC1_C3089	2970.56	136.2	94.3	159.6	89.2	55.3	65.4
[R].WQASSLPADDLCTENAIMLK.[R]	1xTMT6plex [K20]; 1xTMT6plex [N-Term]; 1xDBIA [C12]	Q14204	DYHC1_C3573	2960.56	96.8	84.3	115.8	86.5	129.3	87.4
[K].LHSLQPHACFR.[L]	1xTMT6plex [N-Term]; 1xDBIA [C9]	Q14204	DYHC1_C4121	1834.01	100.8	99.7	158.4	98.7	75.7	66.7
[R].SACDTVDTWLDDTAK.[G]	1xTMT6plex [K15]; 1xTMT6plex [N-Term]; 1xDBIA [C3]	Q14204	DYHC1_C4216	2395.22	117	83.9	144.3	96.5	84.1	74.4
[K].VQYPQSQACK.[M]	1xTMT6plex [K10]; 1xTMT6plex [N-Term]; 1xDBIA [C9]	Q14204	DYHC1_C633	1906.06	116.6	96.3	168.5	95.5	62.6	60.5
[R].SLETCMYDHK.[T]	1xTMT6plex [K10]; 1xTMT6plex [N-Term]; 1xDBIA [C5]	Q14204	DYHC1_C867	1981.03	123.1	93.5	164.2	83.5	66.1	69.6
[R].QVLHMPLTAPVCNR.[S]	1xTMT6plex [N-Term]; 1xDBIA [C12]	Q14207	NPAT_C978	2104.17	109.6	90.9	132.6	101.1	92.7	73.1
[K].ALCHLNVPVTVVLDAAVGYIMEK.[A]	1xTMT6plex [K23]; 1xTMT6plex [N-Term]; 1xDBIA [C3]	Q14232	EI2BA_C169	3209.82	120.3	100.1	134.4	97.6	79.2	68.3
[K].ALCHLNVPVTVVLDAAVGYIMEK.[A]	1xOxidation [M21]; 1xTMT6plex [K23]; 1xTMT6plex [N-Term]; 1xDBIA [C3]	Q14232	EI2BA_C169	3225.81	105.9	103.8	143.1	91.3	87.7	68.3
[K].VILALGDYMGATCHACIGGTNVR.[N]	1xCarbamidomethyl [C13]; 1xTMT6plex [N-Term]; 1xDBIA [C16]	Q14240	IF4A2_C135	2917.5	97.8	104.6	138.6	95	81.3	82.7
[K].HCSQVDSVR.[G]	1xTMT6plex [N-Term]; 1xDBIA [C2]	Q14247	SRC8_C112	1555.82	104.9	96	187.9	84.6	56.8	69.8
[K].CALGWDHQEK.[L]	1xTMT6plex [K10]; 1xTMT6plex [N-Term]; 1xDBIA [C1]	Q14247	SRC8_C246	1941.04	126	91	174.4	94.6	55.5	58.4
[R].FTYCSQVLGLHCYK.[K]	1xCarbamidomethyl [C12]; 1xTMT6plex [K14]; 1xTMT6plex [N-Term]; 1xDBIA [C4]	Q14258	TRI25_C498	2473.31	117.1	85.3	158	94.3	73.3	71.9
[K].NTVLCNVVEQFLQADLAR.[E]	1xTMT6plex [N-Term]; 1xDBIA [C5]	Q14258	TRI25_C70	2558.4	99.1	90.4	112.1	98.4	109.1	90.9
[R].SCSLVLEHQPDNIK.[A]	1xTMT6plex [K14]; 1xTMT6plex [N-Term]; 1xDBIA [C2]	Q14318	FKBP8_C295	2337.3	107.7	75.7	140	80.5	118.4	77.5
[K].QCEINYVK.[K]	1xTMT6plex [K8]; 1xTMT6plex [N-Term]; 1xDBIA [C2]	Q14331	FRG1_C205	1750.99	106.9	99.8	140.8	105.9	72.5	74.2
[K].DYFLEFEGDPHCLR.[D]	1xTMT6plex [N-Term]; 1xDBIA [C12]	Q14344	GNA13_C318	2266.12	82.7	76.9	110.8	86.9	150.4	92.4
[K].VQEAPIDEHWIIECNDGVFQR.[L]	1xTMT6plex [N-Term]; 1xDBIA [C14]	Q14353	GAMT_C91	3023.52	113	101.2	108	93.2	116.3	68.3
[K].EKPVCGTTYK.[V]	2xTMT6plex [K2; K10]; 1xTMT6plex [N-Term]; 1xDBIA [C5]	Q14444	CAPR1_C226	2109.23	129.8	97.4	148.3	101.9	60.2	62.3
[K].GYGFITFSDSECAK.[K]	1xTMT6plex [K14]; 1xTMT6plex [N-Term]; 1xDBIA [C12]	Q14498	RBM39_C303	2279.18	105.9	77.9	142.1	83.5	118.8	71.8
[K].LKELFPVLCQPDNPSVR.[T]	1xTMT6plex [K2]; 1xTMT6plex [N-Term]; 1xDBIA [C9]	Q14562	DHX8_C123	2709.55	100.4	77.1	121.8	91.9	133.6	75.2
[K].YTQPNICR.[N]	1xTMT6plex [N-Term]; 1xDBIA [C7]	Q14566	MCM6_C180	1519.83	110.9	91.5	143	91.4	77.1	86
[R].LVFLACCVAPTNPR.[F]	1xCarbamidomethyl [C7]; 1xTMT6plex [N-Term]; 1xDBIA [C6]	Q14566	MCM6_C301	2086.15	119.9	92	140.2	94.8	78.5	74.6
[R].GDINVCIVGDPSTAK.[S]	1xTMT6plex [K15]; 1xTMT6plex [N-Term]; 1xDBIA [C6]	Q14566	MCM6_C393	2243.25	103.1	90.3	123.3	82.1	116.6	84.5
[R].MHCCDEVQPK.[H]	1xCarbamidomethyl [C4]; 1xTMT6plex [K10]; 1xTMT6plex [N-Term]; 1xDBIA [C3]	Q14566	MCM6_C636	2001.01	104.1	89.5	141.8	92.1	83.6	88.8
[R].LGFSEYCR.[I]	1xTMT6plex [N-Term]; 1xDBIA [C7]	Q14566	MCM6_C721	1499.79	107.4	90.5	125.5	86.9	109.2	80.5
[R].DADADAGGGADGGDGRGGHSCR.[G]	1xTMT6plex [N-Term]; 1xDBIA [C21]	Q14657	LAGE3_C23	2499.12	113.5	98	175.8	95.5	50.2	67
[K].TFESTENPDDFLPSVMTCVNYLK.[L]	1xTMT6plex [K23]; 1xTMT6plex [N-Term]; 1xDBIA [C18]	Q14669	TRIPC_C1959	3404.72	106.1	78.7	106.6	97.9	131.9	78.8
[R].SCSSSSAVIVPQPEDPDRANTSER.[Q]	1xTMT6plex [N-Term]; 1xDBIA [C2]	Q14669	TRIPC_C35	3057.51	104.8	73.4	140.4	87.8	113.6	80
[R].AVLIDEVCTMNDGPHSALYTMMK.[D]	1xTMT6plex [K23]; 1xTMT6plex [N-Term]; 1xDBIA [C8]	Q14671	PUM1_C1102	3293.68	106.5	106.6	153.5	89.1	83.6	60.7
[R].SESGGLGVSMVEYVLSSSPGDSCLR.[K]	1xTMT6plex [N-Term]; 1xDBIA [C23]	Q14671	PUM1_C234	3041.51	96.4	89.4	154.1	92.1	96.2	71.7
[R].AMPVPTTPEFQSPVTTDQPISPEPITQPSCIK.[R]	1xOxidation [M2]; 1xTMT6plex [K32]; 1xTMT6plex [N-Term]; 1xDBIA [C30]	Q14676	MDC1_C1720	4207.21	107.3	86.6	93.8	99.1	146.5	66.6
[R].AMPVPTTPEFQSPVTTDQPISPEPITQPSCIK.[R]	1xTMT6plex [K32]; 1xTMT6plex [N-Term]; 1xDBIA [C30]	Q14676	MDC1_C1720	4191.21	85.6	93.7	127.8	83.7	136.1	73.1
[R].VVITCPQDFPHCSIPLR.[V]	1xCarbamidomethyl [C12]; 1xTMT6plex [N-Term]; 1xDBIA [C5]	Q14676	MDC1_C2042	2507.35	100.6	107.2	130.3	88.8	104.4	68.7
[R].CNVEPVGR.[L]	1xTMT6plex [N-Term]; 1xDBIA [C1]	Q14676	MDC1_C26	1398.77	108.3	70.4	163.4	86.6	98.8	72.6
[R].AASQINVCGVR.[K]	1xTMT6plex [N-Term]; 1xDBIA [C8]	Q14678	KANK1_C317	1642.93	119.7	88.8	142.1	96.9	76.2	76.2
[K].LIDFGLCAKPK.[G]	2xTMT6plex [K9; K11]; 1xTMT6plex [N-Term]; 1xDBIA [C7]	Q14680	MELK_C154	2188.35	117.4	100.3	144.3	95.2	69.5	73.3
[R].LSSFSCGQASATPFTDIK.[S]	1xTMT6plex [K18]; 1xTMT6plex [N-Term]; 1xDBIA [C6]	Q14680	MELK_C339	2614.4	130.3	95.2	164.4	93.5	55.8	60.9
[R].LVEDILSSCKV.[-]	1xTMT6plex [K10]; 1xTMT6plex [N-Term]; 1xDBIA [C9]	Q14680	MELK_C649	1960.16	111.3	89.6	146.3	107.8	79.9	65.1
[K].EQSTCNFQAIVISLK.[E]	1xTMT6plex [K15]; 1xTMT6plex [N-Term]; 1xDBIA [C5]	Q14683	SMC1A_C1180	2435.37	103.7	89.9	108	93.8	139.7	65
[K].AESLIGVYPEQGDCVISK.[V]	1xTMT6plex [K18]; 1xTMT6plex [N-Term]; 1xDBIA [C14]	Q14683	SMC1A_C1210	2662.45	88	71.4	116.7	87.4	154.2	82.4
[R].EALIEIDYGDLCEDLK.[D]	1xTMT6plex [K16]; 1xTMT6plex [N-Term]; 1xDBIA [C12]	Q14683	SMC1A_C987	2593.38	83.1	69	95	79	192	81.9
[R].EALIEIDYGDLCEDLKDAQAEEEIK.[Q]	2xTMT6plex [K16; K25]; 1xTMT6plex [N-Term]; 1xDBIA [C12]	Q14683	SMC1A_C987	3836.01	59.2	57.1	62.6	65.1	290.6	65.3
[K].EVLCPESQSPNGVR.[F]	1xTMT6plex [N-Term]; 1xDBIA [C4]	Q14684	RRP1B_C155	2040.07	84	74.3	102.6	81.5	180.5	77
[R].GRDDCGTFEDTGPLLQFDYK.[A]	1xTMT6plex [K20]; 1xTMT6plex [N-Term]; 1xDBIA [C5]	Q14684	RRP1B_C286	3031.52	94.3	80.3	124.4	90.8	128.8	81.4
[K].AGPGSLELCGLPSQK.[T]	1xTMT6plex [K15]; 1xTMT6plex [N-Term]; 1xDBIA [C9]	Q14684	RRP1B_C583	2211.26	91.7	85.5	116.5	90.1	137.1	79
[R].VMSNLVEHNGVLESEAGQPQALGSSGTCSSLK.[K]	1xTMT6plex [K32]; 1xTMT6plex [N-Term]; 1xDBIA [C28]	Q14684	RRP1B_C628	3984.06	89.4	75.2	110.5	89.6	151.1	84.2
[K].QYQAGQTVTCFLK.[K]	1xTMT6plex [K13]; 1xTMT6plex [N-Term]; 1xDBIA [C10]	Q14690	RRP5_C1154	2241.25	111.1	84.3	153.7	90.3	85.4	75.2
[K].TLLCLSLTGPHK.[L]	1xTMT6plex [K12]; 1xTMT6plex [N-Term]; 1xDBIA [C4]	Q14690	RRP5_C1218	2037.23	88.7	78.5	119.8	101.5	122.9	88.6
[K].VGQYLNCIVEK.[V]	1xTMT6plex [K11]; 1xTMT6plex [N-Term]; 1xDBIA [C7]	Q14690	RRP5_C241	2020.17	102.7	86.3	109.5	99.8	110.1	91.5
[R].LSCQNLGAVLDDVPVQGFFKK.[A]	2xTMT6plex [K20; K21]; 1xTMT6plex [N-Term]; 1xDBIA [C3]	Q14690	RRP5_C361	3261.86	99.3	77.3	157.4	114.4	72.5	78.9
[R].LSCQNLGAVLDDVPVQGFFK.[K]	1xTMT6plex [K20]; 1xTMT6plex [N-Term]; 1xDBIA [C3]	Q14690	RRP5_C361	2904.61	103.3	79.7	146.9	82.6	108.5	78.9
[R].VLLCDPEAK.[K]	1xTMT6plex [K9]; 1xTMT6plex [N-Term]; 1xDBIA [C4]	Q14690	RRP5_C510	1742.03	97.5	81.8	121.4	86.9	124.5	88
[K].LPVITCYADAKPGLQTHGFIIR.[V]	1xTMT6plex [K11]; 1xTMT6plex [N-Term]; 1xDBIA [C6]	Q14690	RRP5_C535	3167.82	98.5	72.5	169.6	86.2	96.3	77
[K].VVVLNCEPSKER.[M]	1xTMT6plex [K10]; 1xTMT6plex [N-Term]; 1xDBIA [C6]	Q14690	RRP5_C599	2127.24	82.5	70.1	136.5	90.8	137.1	83.1
[K].VVVLNCEPSK.[E]	1xTMT6plex [K10]; 1xTMT6plex [N-Term]; 1xDBIA [C6]	Q14690	RRP5_C599	1842.09	85.6	74.2	105.3	89.8	165	80
[R].VLCLSQSEGR.[V]	1xTMT6plex [N-Term]; 1xDBIA [C3]	Q14690	RRP5_C694	1616.9	121.3	93.6	105.3	86.6	105.3	87.9
[K].FEILSVESLCEGMR.[I]	1xTMT6plex [N-Term]; 1xDBIA [C10]	Q14690	RRP5_C81	2138.12	103.7	79.4	119.6	80.5	141.4	75.4
[K].AGLSPANCQSDR.[V]	1xTMT6plex [N-Term]; 1xDBIA [C8]	Q14692	BMS1_C556	1743.9	104	73.1	120.3	94.6	138.7	69.4
[K].EASYGSIDCQYPGSALALDGSSNVEAEVLENDGVSGGLGQR.[E]	1xTMT6plex [N-Term]; 1xDBIA [C9]	Q14694	UBP10_C115	4640.23	98.9	95.5	139.6	104.5	94.1	67.4
[R].TAGQPEGGPGADFGQSCFPAEAGR.[D]	1xTMT6plex [N-Term]; 1xDBIA [C17]	Q14694	UBP10_C254	2832.36	123.2	91.5	155.9	105.9	57.4	66.1
[R].SSVELPPYSGTVLCGTQAVDKLPDGQEYQR.[I]	1xTMT6plex [K21]; 1xTMT6plex [N-Term]; 1xDBIA [C14]	Q14694	UBP10_C40	3992.08	106.8	98	128.9	100.1	98.8	67.4
[R].TPSYSISSTLNPQAPEFILGCTASK.[I]	1xTMT6plex [K25]; 1xTMT6plex [N-Term]; 1xDBIA [C21]	Q14694	UBP10_C94	3366.8	116.4	101.4	163.3	103.5	55.5	59.9
[R].DGSDYEGWCWPGSAGYPDFTNPTMR.[A]	1xTMT6plex [N-Term]; 1xDBIA [C9]	Q14697	GANAB_C502	3334.48	106.1	68.5	130.2	93.7	124	77.4
[K].CTAKPSSSGK.[D]	2xTMT6plex [K4; K10]; 1xTMT6plex [N-Term]; 1xDBIA [C1]	Q14738	2A5D_C17	1949.15	126.6	104.8	159.1	103.5	45.4	60.6
[K].EACGGPSAMATPENLASLMK.[G]	1xTMT6plex [K20]; 1xTMT6plex [N-Term]; 1xDBIA [C3]	Q14781	CBX2_C222	2732.42	100.9	80.9	136.8	88.6	111.2	81.6
[K].QLQVELCEMK.[Q]	1xTMT6plex [K10]; 1xTMT6plex [N-Term]; 1xDBIA [C7]	Q14789	GOGB1_C1462	1975.11	95.7	76.7	98.8	93.1	146.6	89.1
[K].ECMETLLSSNASMK.[E]	1xTMT6plex [K14]; 1xTMT6plex [N-Term]; 1xDBIA [C2]	Q14789	GOGB1_C1713	2298.19	88.8	75.7	148.8	95.6	115.5	75.6
[K].SDPEELREPQQSFSEAQQQLCNTR.[Q]	1xTMT6plex [N-Term]; 1xDBIA [C21]	Q14789	GOGB1_C3144	3345.63	84.8	88.4	139.1	97.4	116.6	73.6
[R].YIPDEADFLLGMATVNNCVSYR.[N]	1xTMT6plex [N-Term]; 1xDBIA [C18]	Q14790	CASP8_C409	3016.51	118.7	96.8	138.5	93.5	82.3	70.2
[R].LLSSSLTADCSLR.[S]	1xTMT6plex [N-Term]; 1xDBIA [C10]	Q147X3	NAA30_C195	1891.05	110.3	88.3	143.5	90.1	79.9	87.9
[R].CPQPPQEQQQLNGLISPELR.[H]	1xTMT6plex [N-Term]; 1xDBIA [C1]	Q147X3	NAA30_C74	2800.5	106.8	101.5	152.5	103.1	77	59.1
[R].LRPFVDGTAGASDPPCVR.[G]	1xTMT6plex [N-Term]; 1xDBIA [C16]	Q14807	KIF22_C65	2383.28	106.1	84.5	151.2	95.9	90.5	71.8
[R].GMDSCSLEIANWR.[N]	1xTMT6plex [N-Term]; 1xDBIA [C5]	Q14807	KIF22_C72	2007	97.3	80.7	136.6	94.8	109.6	81
[K].CCNHPYLFPVAAMEAPK.[M]	1xCarbamidomethyl [C1]; 1xTMT6plex [K17]; 1xTMT6plex [N-Term]; 1xDBIA [C2]	Q14839	CHD4_C1019	2702.4	112.5	86.9	156.9	89.8	79.4	74.5
[R].HLCEPGADGAETFADGVPR.[E]	1xTMT6plex [N-Term]; 1xDBIA [C3]	Q14839	CHD4_C1468	2467.22	87	74.7	130	93.9	126.4	88.1
[R].FAEVECLAESHQHLSK.[E]	1xTMT6plex [K16]; 1xTMT6plex [N-Term]; 1xDBIA [C6]	Q14839	CHD4_C1827	2582.38	73.6	81.4	102.1	87.5	177.5	78
[R].FVHLDNLPEDGLQCVLCVGLQFGK.[V]	1xCarbamidomethyl [C14]; 1xTMT6plex [K24]; 1xTMT6plex [N-Term]; 1xDBIA [C17]	Q14966	ZN638_C1026	3455.86	84.4	77.1	104	97.9	156.7	79.8
[R].HFIMQVVCEATQCPDTR.[V]	1xCarbamidomethyl [C8]; 1xTMT6plex [N-Term]; 1xDBIA [C13]	Q14974	IMB1_C228	2560.27	104.6	90.5	108	95.5	119.4	82
[R].ESCLEAYTGIVQGLK.[G]	1xTMT6plex [K15]; 1xTMT6plex [N-Term]; 1xDBIA [C3]	Q14974	IMB1_C765	2365.32	110.1	80.6	117.2	97	112.5	82.6
[K].SDYDMVDYLNELRESCLEAYTGIVQGLK.[G]	1xTMT6plex [K28]; 1xTMT6plex [N-Term]; 1xDBIA [C16]	Q14974	IMB1_C765	3979.02	78.9	88.5	103.8	76.9	170	82
[K].HLCQQLQAEQAAAEK.[R]	1xTMT6plex [K15]; 1xTMT6plex [N-Term]; 1xDBIA [C3]	Q14980	NUMA1_C1367	2422.33	95.6	72.4	123.9	91.5	128	88.5
[K].APVPSTCSSTFPEELSPPSHQAK.[R]	1xTMT6plex [K23]; 1xTMT6plex [N-Term]; 1xDBIA [C7]	Q14980	NUMA1_C160	3151.65	78.7	84.1	108.4	80.2	165.3	83.3
[K].EAEQTCR.[H]	1xTMT6plex [N-Term]; 1xDBIA [C6]	Q14980	NUMA1_C1673	1361.7	103.9	67.1	133.8	83.3	128.9	83
[R].VCPPHLK.[T]	1xTMT6plex [K7]; 1xTMT6plex [N-Term]; 1xDBIA [C2]	Q14980	NUMA1_C1930	1547.95	130.6	100.1	151.7	108.4	51.9	57.3
[K].TCYPLESRPSLSLGTITDEEMK.[T]	1xTMT6plex [K22]; 1xTMT6plex [N-Term]; 1xDBIA [C2]	Q14980	NUMA1_C1937	3224.69	116.5	113	167	87.3	53	63.1
[R].QFCSTQAALQAMER.[E]	1xTMT6plex [N-Term]; 1xDBIA [C3]	Q14980	NUMA1_C961	2109.08	116.4	80.4	146.5	104.3	78.8	73.6
[K].KEPMSICDK.[G]	2xTMT6plex [K1; K9]; 1xTMT6plex [N-Term]; 1xDBIA [C7]	Q149N8	SHPRH_C171	2034.17	109.5	109.7	137.3	106	60.6	77
[K].SCVAAFLDVVIGGR.[A]	1xTMT6plex [N-Term]; 1xDBIA [C2]	Q14C86	GAPD1_C374	1932.09	119.8	81	158.3	115.5	64.7	60.7
[R].FSLCSDNLEGISEGPSNR.[S]	1xTMT6plex [N-Term]; 1xDBIA [C4]	Q14C86	GAPD1_C568	2450.22	138.4	95.4	147.4	95.3	55.5	68
[K].EPCQVQSCQEEMISLGDGDIR.[T]	1xCarbamidomethyl [C8]; 1xTMT6plex [N-Term]; 1xDBIA [C3]	Q15003	CND2_C397	2919.38	126.2	106.2	137.4	89.9	83.3	57.1
[R].TMCPLLSMKPGEYSYFSPR.[T]	1xTMT6plex [K9]; 1xTMT6plex [N-Term]; 1xDBIA [C3]	Q15003	CND2_C418	2961.54	133.1	100.2	158.6	96.9	45.8	65.3
[R].SLPPVMAQNLSIPLAFACLLHLANEK.[N]	1xTMT6plex [K26]; 1xTMT6plex [N-Term]; 1xDBIA [C18]	Q15003	CND2_C714	3545.02	117.7	88.9	118.6	94.6	105.1	75.2
[truncated: 2,064 more rows]
